# Supplementary material for: Direct transfer of tri- and di-fluoroethanol units enabled by radical activation of organosilicon reagents
Source: PubMed Central journal article supplement (PMC7265496; doi:10.1038/s41467-020-16380-9), 2020-06-02
Supplement: 41467_2020_16380_MOESM1_ESM.pdf [file 41467_2020_16380_MOESM1_ESM.pdf]

## SUPPLEMENTARY INFORMATION

### **Direct Transfer of Tri- and di- fluoroethanol Units Enabled by Radical Activation of Organosilicon Reagents**

Chen *et al.*

## Supplementary Methods

### General information

Chromatography: HaiLang Silica Flash P60 size 40~63  $\mu\text{m}$  (200~300 mesh), TLC: HaiLang silica gel 60 (0.25mm). Visualization of the chromatogram was performed by UV, phosphomolybdic acid and  $\text{KMnO}_4$  staining. Mass spectra were recorded on Bruker UltiMate3000 & Compact, Thermo ISQ LT, LTQ XL and VELOS pro & ORBITRIP mass spectrometers.  $^1\text{H}$ ,  $^{13}\text{C}$ ,  $^{19}\text{F}$  were recorded on Bruker 400, Bruker 600 and JNM-ECZ 400 using  $\text{CDCl}_3$  or  $\text{DMSO-d}_6$  as solvent. Chemical shift values are reported in ppm with the solvent resonance as the internal standard ( $\text{CDCl}_3$ :  $\delta$  7.26 for  $^1\text{H}$ ,  $\delta$  77.16 for  $^{13}\text{C}$ ). Data are reported as follows: chemical shifts, multiplicity (s = singlet, bs = broad singlet, d = doublet, dd = doublet of doublets, t = triplet, td = triplet of doublets, m = multiplet), coupling constants (Hz), and integration. Infrared spectra were recorded on an Agilent Technologies Cary 630 FTIR and wavelengths are reported in  $\text{cm}^{-1}$ . Melting point was measured by INESA SGW X-4. All reagents were used as received and solvents were dried and degassed according to standard procedure. If no special description, all reactions were conducted under nitrogen.  $\text{MnF}_3$ ,  $\text{MnPO}_4$  hydrate and  $\text{Mn}(\text{OAc})_3 \cdot 2\text{H}_2\text{O}$  was purchased from Alfa,  $\text{Mn}(\text{OAc})_2 \cdot 4\text{H}_2\text{O}$  was purchased from adamas, L(-)-menthol, Epiandrosterone, Cholesterol, Diosgenin for preparation of **7ai**, **7aj**, **7ak**, **7am** were purchased from energy-chemicals and Testosterone, Estrone, ( $8\alpha$ )-Estradiol for preparation of **7al**, **7ao**, **7ap** were purchased from adamas. Vitamin E for preparation of **7n** was purchased from TCI. Other alcohols and ketones were purchased from Bidepharm and Meryer. Cinnamic acids **12a**~**12l** were purchased from adamas and used without further purification.

### Synthesis of $\alpha$ -silyl trifluoroethanols

#### Synthesis of 1-((dimethyl)(phenyl)silyl)-2,2,2-trifluoroethan-1-ol (**1a**)

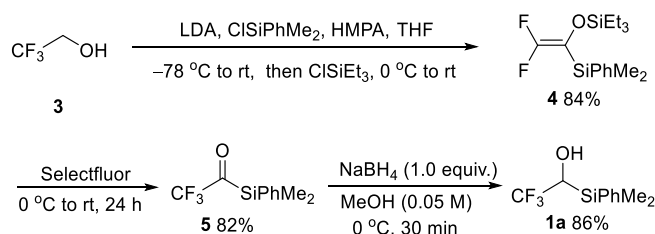

Supplementary Figure. 1 Synthesis of 1-((dimethyl)(phenyl)silyl)-2,2,2-trifluoroethan-1-ol (**1a**)

1-((Dimethyl)(phenyl)silyl)-2,2,2-trifluoroethan-1-ol was synthesized according to Welch's protocol with slightly variation and modification.<sup>[1]</sup> To a stirring solution of 2,2,2-trifluoroethanol (6.0 g, 60 mmol) and phenyldimethylchlorosilane (10.2 g, 60 mmol, 1.0 equiv.) and HMPA (6.0 mL) in dry THF (60 mL) in low temperature bath under  $-78\text{ }^\circ\text{C}$ , was added LDA (prepared by Diisopropylamine with *n*-BuLi in THF, 3.5 equiv.) dropwise with syringe. The mixture was kept for 4 h under  $-78\text{ }^\circ\text{C}$  and allowed to rt, after which the mixture was stirred for another 15 h. After addition of triethylchlorosilane (15 mL, 90 mmol, 1.5 equiv.) to the mixture at  $0\text{ }^\circ\text{C}$ , the mixture was stirred for 4 h, and then quenched by the addition of a saturated aqueous solution of  $\text{NH}_4\text{Cl}$  (20 mL), **4** was isolated by silica gel column chromatography (silica: 200~300 mesh) using PE as eluent (colorless oil, 16.5 g, 50.4 mmol, 84% yield).

To a solution of Selectfluor (5.4 g, 15 mmol, 1.5 equiv.) in 40 mL of MeCN was added a solution of compound **4** (3.3 g, 10 mmol) in 10 mL of DCM at  $0\text{ }^\circ\text{C}$ . The resulting mixture was stirred at room temperature for 24 h and quenched by the addition of 20 mL water, then extracted with DCM. The organic layer was dried over  $\text{Na}_2\text{SO}_4$ , filtered and concentrated. Product **5** was purified by either silica gel column chromatography (silica: 200~300 mesh) using PE as eluent (slight yellow oil, 1.9 g, 8.2 mmol, 82% yield).

To a stirring solution of **5** (0.46 g, 2.0 mmol) in MeOH (0.05 M) at 0 °C was added NaBH<sub>4</sub> (0.074 g, 2.0 mmol, 1.0 equiv.) in portions, the resulting mixture was stirred for 0.5 h and quenched by water, then extracted with DCM. The organic layer was dried over Na<sub>2</sub>SO<sub>4</sub>, filtered, and concentrated, 1-((dimethyl)(phenyl)silyl)-2,2,2-trifluoroethan-1-ol (**1a**) was further purified by silica gel column chromatography (siliga: 200~300 mesh) using PE/EA (50/1, v/v) (colorless oil, 0.40 g, 1.72 mmol, 86% yield).

**1-((dimethyl)(phenyl)silyl)-2,2,2-trifluoroethan-1-one (5)** NMR spectroscopy: <sup>1</sup>H NMR (400 MHz, CDCl<sub>3</sub>) δ 7.56 (d, *J* = 6.7 Hz, 2H), 7.49–7.40 (m, 3H), 0.65 (s, 6H); <sup>13</sup>C NMR (100 MHz, CDCl<sub>3</sub>) δ 222.4 (q, *J* = 36.4 Hz), 134.3, 131.2, 130.9, 128.5, 116.0 (q, *J* = 294.7 Hz), –5.0; <sup>19</sup>F NMR (375 MHz, CDCl<sub>3</sub>) δ –79.4 (s, 3F). IR (ATR): 3075, 1689, 1431, 1271, 1193, 1133, 738, 697 cm<sup>-1</sup>. HRMS (EI+, *m/z*): calcd for C<sub>10</sub>H<sub>11</sub>F<sub>3</sub>OSi<sup>+</sup> (M)<sup>+</sup>: 232.0531; Found: 232.0533.

**1-((Dimethyl)(phenyl)silyl)-2,2,2-trifluoroethanol (1a)** NMR spectroscopy: <sup>1</sup>H NMR (400 MHz, CDCl<sub>3</sub>) δ 7.61 (d, *J* = 6.1 Hz, 2H), 7.47–7.39 (m, 3H), 3.84 (q, *J* = 11.1 Hz, 1H), 0.49 (d, *J* = 3.1 Hz, 6H); <sup>13</sup>C NMR (100 MHz, CDCl<sub>3</sub>) δ 134.4, 134.2, 130.3, 128.2, 127.1 (q, *J* = 278.4 Hz), 65.3 (q, *J* = 33.1 Hz), –4.7, –5.4; <sup>19</sup>F NMR (375 MHz, CDCl<sub>3</sub>) δ –70.6 (d, *J* = 8.9 Hz, 3F). IR (ATR): 3441, 2963, 2919, 1428, 1253, 1148, 1085, 1044, 738, 701 cm<sup>-1</sup>. HRMS (ESI, *m/z*): calcd for C<sub>10</sub>H<sub>13</sub>F<sub>3</sub>NaO<sup>+</sup> (M+Na)<sup>+</sup>: 257.0580; Found: 257.0570.

#### Synthesis of 1-((methyl)(diphenyl)silyl)-2,2,2-trifluoroethan-1-ol (**1b**)

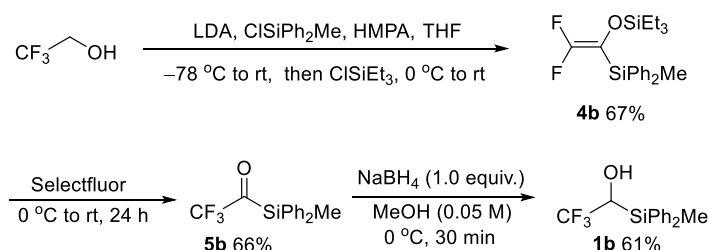

Supplementary Figure. 2 Synthesis of 1-((methyl)(diphenyl)silyl)-2,2,2-trifluoroethan-1-ol (**1b**)

1-((Diphenyl)(methyl)silyl)-2,2,2-trifluoroethan-1-ol was synthesized according to Welch's protocol with slightly variation and modification.<sup>[1]</sup> To a stirring solution of 2,2,2-trifluoroethanol (3.0 g, 30 mmol) and methyl-diphenylchlorosilane (6.96 g, 30 mmol, 1.0 equiv.) and HMPA (3 mL) in dry THF (30 mL) in low temperature bath under –78 °C, was added LDA (2.0 M in THF, 3.5 equiv.) dropwise with syringe, the mixture was kept for 4 h under –78 °C and allowed to RT, after which the mixture was stirred for 15 h. After addition of triethylchlorosilane (7.5 mL, 45 mmol, 1.5 equiv.) to the mixture under 0 °C, the resulting mixture was stirred for 4 h and then quenched by the addition of a saturated aqueous solution of NH<sub>4</sub>Cl (20 mL), compound **4b** was coarsely isolated by silica gel column chromatography (siliga: 200~300 mesh) using PE as eluent (colorless oil, 7.9 g, 20.1 mmol, 67% yield).

To a solution of Selectfluor (5.4 g, 15 mmol, 1.5 equiv.) in 40 mL of MeCN was added a solution of compound **4b** (3.9 g, 10 mmol) in 10 mL of DCM under 0 °C. The resulting mixture was stirred at room temperature for 24 h and quenched by the addition of 20 mL water, then extracted with DCM. The organic layer was dried over Na<sub>2</sub>SO<sub>4</sub>, filtered, and concentrated. Product **5b** was purified by silica gel column chromatography (siliga: 200~300 mesh) using PE as eluent (slight yellow oil, 1.0 g, 3.3 mmol, 66% yield).

To a stirring solution of **5b** (0.58 g, 2.0 mmol) in MeOH (0.05 M) under 0 °C was added NaBH<sub>4</sub> (0.074 g, 2.0 mmol, 1.0 equiv.) in portions, the resulting mixture was stirred for 0.5 h and quenched by water, then extracted with DCM. The organic layer was dried over Na<sub>2</sub>SO<sub>4</sub>, filtered, and concentrated, 1-((Diphenyl)(methyl)silyl)-2,2,2-trifluoroethan-1-ol (**1b**) was further purified by silica gel column chromatography (siliga: 200~300 mesh) using PE/EA (50/1, v/v) (colorless oil, 0.35 g, 1.2 mmol, 61% yield).

**Trifluoroacetyldiphenylmethylsilane (5b)** NMR spectroscopy:  $^1\text{H}$  NMR (400 MHz,  $\text{CDCl}_3$ )  $\delta$  7.64 (d,  $J = 6.7$  Hz, 4H), 7.53 (t,  $J = 7.2$  Hz, 2H), 7.46 (t,  $J = 7.2$  Hz, 4H), 0.97 (s, 3H);  $^{13}\text{C}$  NMR (100 MHz,  $\text{CDCl}_3$ )  $\delta$  221.1 (q,  $J = 34.8$  Hz), 135.2, 131.1, 129.9, 128.6, 115.9 (q,  $J = 295.2$  Hz),  $-5.5$ ;  $^{19}\text{F}$  NMR (375 MHz,  $\text{CDCl}_3$ )  $\delta$   $-78.9$  (s, 3F). IR (ATR): 3075, 1685, 1431, 1267, 1193, 1137, 731, 697  $\text{cm}^{-1}$ . HRMS (ESI, m/z): calcd for  $\text{C}_{15}\text{H}_{13}\text{F}_3\text{NaOSi}^+$  ( $\text{M}+\text{Na}$ ) $^+$ : 317.0580; Found: 317.0570.

**1-((methyl)(Diphenyl)silyl)-2,2,2-trifluoroethanol (1b)** NMR spectroscopy:  $^1\text{H}$  NMR (400 MHz,  $\text{CDCl}_3$ )  $\delta$  7.67–7.64 (m, 4H), 7.48–7.40 (m, 6H), 4.23 (q,  $J = 11.1$  Hz, 1H), 0.78 (s, 3H), 2.00 (s, 1H);  $^{13}\text{C}$  NMR (100 MHz,  $\text{CDCl}_3$ )  $\delta$  135.5, 135.0, 132.8, 132.0, 130.5, 130.4, 128.3, 128.3, 126.8 (q,  $J = 278.6$  Hz), 64.9 (q,  $J = 32.8$  Hz),  $-5.9$ ;  $^{19}\text{F}$  NMR (375 MHz,  $\text{CDCl}_3$ )  $\delta$   $-69.8$  (d,  $J = 11.9$  Hz, 3F). IR (ATR): 3429, 2919, 1428, 1256, 1152, 1085, 1044, 731, 697  $\text{cm}^{-1}$ . HRMS (ESI, m/z): calcd for  $\text{C}_{15}\text{H}_{15}\text{F}_3\text{NaOSi}^+$  ( $\text{M}+\text{Na}$ ) $^+$ : 319.0736; Found: 319.0739.

#### Synthesis of 2,2,2-trifluoro-1-((triethyl)silyl)ethan-1-ol (1c)

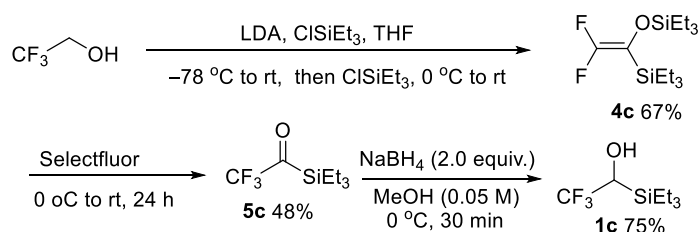

Supplementary Figure. 3 Synthesis of 2,2,2-trifluoro-1-((triethyl)silyl)ethan-1-ol (1c)

2,2,2-trifluoro-1-((triethyl)silyl)-ethan-1-ol was synthesized according to Welch's protocol with slightly variation and modification.<sup>[1]</sup> To a stirring solution of 2,2,2-trifluoroethanol (3.0 g, 30 mmol) and triethylchlorosilane (5.0 mL, 30 mmol, 1.0 equiv.) in dry THF (30 mL) in low temperature bath under  $-78$  °C, was added LDA (2.0 M in THF, 3.5 equiv.) dropwise with syringe, the mixture was kept for 2 h under  $-78$  °C and allowed to rt, after which the mixture was stirred for 3 h. After addition of triethylchlorosilane (7.5 mL, 45 mmol, 1.5 equiv.) to the mixture at 0 °C, the resulting mixture was stirred for 4 h and then quenched by the addition of a saturated aqueous solution of  $\text{NH}_4\text{Cl}$  (20 mL), compound **4c** was coarsely isolated with 67% yield (colorless oil, 6.2 g, 20.1 mmol) by silica gel column chromatography using PE as eluent.

To a solution of Selectfluor (2.66 g, 7.5 mmol) in 50 mL of MeCN was added a solution of compound **4c** (5 mmol) in 12.5 mL of DCM at 0 °C. The resulting mixture was stirred at room temperature for 12 h and quenched by the addition of 20 mL water, then extracted with DCM. The organic layer was dried over  $\text{Na}_2\text{SO}_4$ , filtered, and concentrated. Product **5c** was purified by distillation under reduced pressure using cold trap (slight yellow oil, 0.5 g, 2.4 mmol, 48% yield).

To a stirring solution of **5c** (0.42 g, 2.0 mmol) in MeOH (0.05 M) at 0 °C was added  $\text{NaBH}_4$  (0.148 g, 4.0 mmol, 2.0 equiv.) in portions, the resulting mixture was stirred for 0.5 h and quenched by water, then extracted with DCM. The organic layer was dried over  $\text{Na}_2\text{SO}_4$ , filtered, and concentrated, 2,2,2-trifluoro-1-((triethyl)silyl)ethan-1-ol (**1c**) was further purified by silica gel column chromatography using PE/EA (10/1, v/v) (colorless oil, 0.32 g, 1.5 mmol, 75% yield).

**1-((triethyl)silyl)-2,2,2-trifluoroethanol (1c)** NMR spectroscopy:  $^1\text{H}$  NMR (400 MHz,  $\text{CDCl}_3$ )  $\delta$  3.79 (q,  $J = 11.5$  Hz, 1H), 1.01 (t,  $J = 7.8$  Hz, 9H), 0.76–0.69 (m, 6H), 1.82 (s, 1H);  $^{13}\text{C}$  NMR (100 MHz,  $\text{CDCl}_3$ )  $\delta$  127.5 (q,  $J = 278.4$  Hz), 64.1 (q,  $J = 33.1$  Hz), 7.2, 1.9;  $^{19}\text{F}$  NMR (375 MHz,  $\text{CDCl}_3$ )  $\delta$   $-71.0$  (d,  $J = 8.9$  Hz, 3F). IR (ATR): 3429, 2960, 2881, 1461, 1264, 1152, 1085, 723, 686  $\text{cm}^{-1}$ . HRMS (EI, m/z): calcd for  $\text{C}_6\text{H}_{12}\text{F}_3\text{OSi}^+$  ( $\text{M}-\text{Et}$ ) $^+$ : 185.0610; Found: 185.0607.



### Synthesis of 1-triphenylsilyl-2,2,2-trifluoroethanol (**1d**)

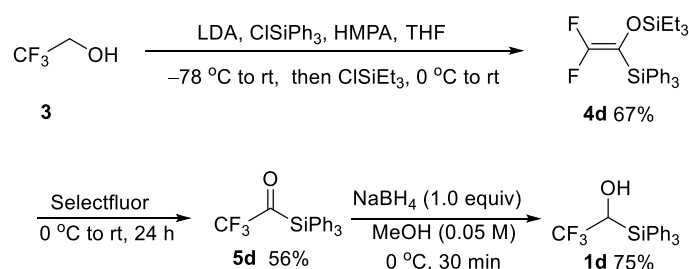

Supplementary Figure. 4 Synthesis of 1-triphenylsilyl-2,2,2-trifluoroethanol (**1d**)

2,2,2-Trifluoro-1-(triphenylsilyl)-ethan-1-ol was synthesized according to Welch's protocol with slightly variation and modification.<sup>[1]</sup> To a stirring solution of 2,2,2-trifluoroethanol (3.0 g, 30 mmol) and triphenylchlorosilane (8.82 g, 30 mmol, 1.0 equiv.) and HMPA (3 mL) in dry THF (30 mL) in low temperature bath under  $-78\text{ }^\circ\text{C}$ , was added LDA (2.0 M in THF, 3.5 equiv.) dropwise with syringe. The mixture was kept for 4 h under  $-78\text{ }^\circ\text{C}$  and allowed to rt, after which the mixture was stirred for 15 h. After addition of triethylchlorosilane (7.5 mL, 45 mmol, 1.5 equiv.) to the mixture at  $0\text{ }^\circ\text{C}$ , the mixture was stirred for 4 h, and then quenched by the addition of a saturated solution of  $\text{NH}_4\text{Cl}$  (20 mL), compound **4d** was coarsely isolated by silica gel column chromatography (silica: 200~300 mesh) using PE as eluent (colorless oil, 9.1 g, 20.1 mmol, 67% yield).

To a solution of Selectfluor (5.40 g, 15 mmol, 1.5 equiv.) in 40 mL of MeCN was added a solution of compound **4d** (4.5 g, 10 mmol) in 10 mL of DCM at  $0\text{ }^\circ\text{C}$ . The resulting mixture was stirred at room temperature for 12 h and quenched by the addition of water, then extracted with DCM. The organic layer was dried over  $\text{Na}_2\text{SO}_4$ , filtered, and concentrated. Product **5d** was purified by silica gel column chromatography (silica: 200~300 mesh) using PE as eluent (white solid, 2.0 g, 5.6 mmol, 56% yield).

To a stirring solution of **5d** (0.71 g, 2.0 mmol) in MeOH (0.05 M) at  $0\text{ }^\circ\text{C}$  was added  $\text{NaBH}_4$  (0.074 g, 2.0 mmol, 1.0 equiv.) in portions, the resulting mixture was stirred for 0.5 h and quenched by water, then extracted with DCM. The organic layer was dried over  $\text{Na}_2\text{SO}_4$ , filtered, and concentrated, 2,2,2-trifluoro-1-(triphenylsilyl)ethan-1-ol (**1d**) was further purified by silica gel column chromatography (silica: 200~300 mesh) using PE/EA (50/1, v/v) (white solid, 0.54 g, 1.5 mmol, 75% yield).

**1-((Triphenyl)silyl)-2,2,2-trifluoroethanol (1d)**, white solid, mp:  $127\text{ }^\circ\text{C}$ – $130\text{ }^\circ\text{C}$ . NMR spectroscopy:  $^1\text{H}$  NMR (400 MHz,  $\text{CDCl}_3$ )  $\delta$  7.65 (dd,  $J = 7.9, 1.2\text{ Hz}$ , 6H), 7.52–7.47 (m, 3H), 7.44–7.40 (m, 6H), 4.55 (q,  $J = 11.1\text{ Hz}$ , 1H), 2.13 (s, 1H);  $^{13}\text{C}$  NMR (100 MHz,  $\text{CDCl}_3$ )  $\delta$  136.5, 130.9, 130.6, 130.6, 128.3, 126.7 (q,  $J = 278.4\text{ Hz}$ ), 65.4 (q,  $J = 33.1\text{ Hz}$ );  $^{19}\text{F}$  NMR (375 MHz,  $\text{CDCl}_3$ )  $\delta$   $-68.4$  (d,  $J = 11.9\text{ Hz}$ , 3F). IR (ATR): 3470, 2922, 1379, 1260, 1148, 1111, 737, 701  $\text{cm}^{-1}$ . HRMS (ESI, m/z): calcd for  $\text{C}_{20}\text{H}_{18}\text{F}_3\text{O}^+$  ( $\text{M}+\text{H}$ ) $^+$ : 359.1074; Found: 359.1066.

### Synthesis of 1-phenyldimethylsilyl-2,2-difluoroethanol (**2a**)

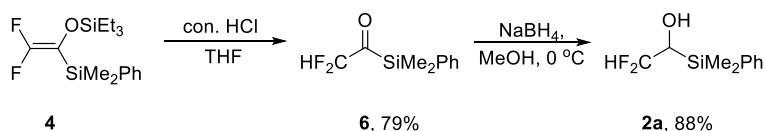

Supplementary Figure. 5 Synthesis of 1-phenyldimethylsilyl-2,2-difluoroethanol (**2a**)

To a stirring solution of **4** (15.7g, 48 mmol, 1.0 equiv.) in dry THF (10 mL) at  $0\text{ }^\circ\text{C}$  was added con. HCl (20 mL), the reaction medium was brought to room temperature and stirred for 3.0 h, then extracted with EA. The combined organic phase was washed with brine, dried over  $\text{Na}_2\text{SO}_4$ , filtered, and concentrated. Product **6** was purified by silica gel column chromatography (silica: 200~300 mesh) using PE as eluent (light yellow oil, 8.1 g, 37.9 mmol, 79% yield).

To a stirring solution of **6** (0.43 g, 2.0 mmol) in MeOH (0.05 M) at 0 °C was added NaBH<sub>4</sub> (0.074 g, 2.0 mmol, 1.0 equiv.) in portions, the resulting mixture was stirred for 0.5 h and quenched by water, then extracted with DCM. The organic layer was dried over Na<sub>2</sub>SO<sub>4</sub>, filtered, and concentrated, 2,2-difluoro-1-(phenyldimethylsilyl)ethan-1-ol (**2a**) was further purified by silica gel column chromatography (silica: 200~300 mesh) using PE/EA (50/1, v/v) (colorless oil, 0.38 g, 1.8 mmol, 88% yield).

**Difluoroacetylphenyldimethylsilane (6)** NMR spectroscopy: <sup>1</sup>H NMR (400 MHz, CDCl<sub>3</sub>) δ 7.57 (d, *J* = 6.4 Hz, 2H), 7.45–7.39 (m, 3H), 5.39 (t, *J* = 54.9 Hz, 1H), 0.62 (s, 6H); <sup>13</sup>C NMR (100 MHz, CDCl<sub>3</sub>) δ 233.0 (t, *J* = 32.0 Hz), 134.3, 132.4, 130.5, 128.4, 112.2 (t, *J* = 249.9 Hz), –4.7; <sup>19</sup>F NMR (375 MHz, CDCl<sub>3</sub>) δ –125.3 (d, *J* = 53.6 Hz, 3F). IR (ATR): 3071, 2960, 1670, 1428, 1252, 1118, 1044, 828, 787, 697 cm<sup>-1</sup>. HRMS (ESI, m/z): calcd for C<sub>10</sub>H<sub>13</sub>F<sub>2</sub>OSi<sup>+</sup> (M+H)<sup>+</sup>: 215.0698; Found: 215.0693.

**1-((Phenyl)(dimethyl)silyl)-2,2-difluoroethanol (2a)** NMR spectroscopy: <sup>1</sup>H NMR (400 MHz, CDCl<sub>3</sub>) δ 7.62–7.59 (m, 2H), 7.44–7.40 (m, 3H), 5.77 (td, *J* = 56.4, 4.1 Hz, 1H), 3.70 (ddd, *J* = 21.5, 14.4, 4.1 Hz, 1H), 0.47 (d, *J* = 2.8 Hz, 6H); <sup>13</sup>C NMR (100 MHz, CDCl<sub>3</sub>) δ 134.7, 134.3, 130.1, 128.3, 117.7 (t, *J* = 242.3 Hz), 66.2 (t, *J* = 24.1 Hz), –5.01, –5.14; <sup>19</sup>F NMR (375 MHz, CDCl<sub>3</sub>) δ –121.1– –123.1 (m, 2F). IR (ATR): 3567, 3422, 3071, 2960, 2915, 1457, 1428, 1379, 1252, 1110, 1059, 1014, 962, 820, 783, 701 cm<sup>-1</sup>. HRMS (ESI, m/z): calcd for C<sub>10</sub>H<sub>14</sub>F<sub>2</sub>NaOSi<sup>+</sup> (M+Na)<sup>+</sup>: 239.0674; Found: 239.0668.

## Preparation of substituted allylic sulfone.

### Synthesis of phenyl-2-acylallylic sulfone

Phenyl-2-acylallylic sulfones (**7b~7i**, **7k~7p**, **7ah**) were synthesized according to reported procedure [2].

### Synthesis of 2-((Phenylsulfonyl)methyl)acrylate

2-((Phenylsulfonyl)methyl)acryloyl chloride was prepared according to reported procedure.[3] 4-bromobut-2-en-1-ol was prepared by reduction of methyl 4-bromocrotonate with DIBAL-H.[4] Estradiol was protected with benzyl group before esterification.[5] Allylic sulfone (**7j**, **7r~7z**, **7ae**, **7ai~7ap**) were prepared following the general esterification procedure shown below:

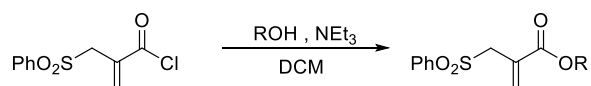

Supplementary Figure. 6 Synthesis of 2-((Phenylsulfonyl)methyl)acrylate

Under N<sub>2</sub> atmosphere, to a solution of corresponding alcohol (4.0 mmol) and triethylamine (505 mg, 5 mmol, 1.25 equiv.) in DCM (10 mL) was added acryl chloride (1220.0 mg, 5 mmol, 1.25 equiv.) in 5 mL DCM at 0 °C. Then the resulting mixture was stirred at room temperature overnight. The reaction was quenched by addition of water (10 mL), and the resulting mixture was extracted three times with DCM (3×30 mL) and the combined organic layer was dried over Na<sub>2</sub>SO<sub>4</sub>. The solvent was removed under reduced pressure and the residue was purified with column chromatography on silica gel (silica: 200~300 mesh; PE/EA) to afford the desired product.

### 4-Bromo-but-2-en-1-yl 2-((phenylsulfonyl)methyl)acrylate (7j)

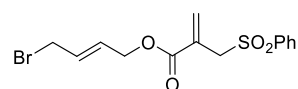

R<sub>f</sub> = 0.14 (PE/EA = 4/1, v/v). Colorless oil, (1.0 g, 3.2 mmol, 46% yield). NMR spectroscopy: <sup>1</sup>H NMR (400 MHz, CDCl<sub>3</sub>) δ 7.87–7.85 (m, 2H), 7.65 (t, *J* = 7.5 Hz, 1H), 7.65–7.53 (m, 2H), 6.54 (s, 1H), 5.95 (s, 1H), 5.88–5.72 (m, 2H), 4.49–4.48 (m, 2H), 4.16 (s, 2H), 4.06–4.04 (m, 2H); <sup>13</sup>C NMR (100 MHz, CDCl<sub>3</sub>) δ 164.5, 138.4, 134.1, 134.0, 130.2,

129.2, 128.9, 127.9, 64.7, 57.6, 43.9. IR (ATR): 2960, 2922, 2855, 1722, 1446, 1260, 1085, 1010, 790, 734  $\text{cm}^{-1}$ . HRMS (ESI,  $m/z$ ): calcd for  $\text{C}_{14}\text{H}_{15}\text{BrO}_4\text{NaS}^+$  ( $\text{M}+\text{Na}$ ) $^+$ : 380.9767; Found: 380.9767.

**Methoxyprop-2-yl 2-(((phenyl)sulfonyl)methyl)acrylate (7r)**

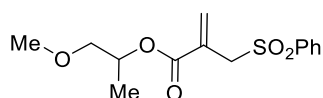

$R_f = 0.16$  (PE/EA = 4:1, v/v). Colorless oil (1.0 g, 3.3 mmol, 83% yield). NMR spectroscopy:  $^1\text{H}$  NMR (400 MHz,  $\text{CDCl}_3$ )  $\delta$  7.85 (d,  $J = 7.4$  Hz, 2H), 7.63 (t,  $J = 7.4$  Hz, 1H), 7.55–7.51 (m, 2H), 6.50 (s, 1H), 5.91 (s, 1H), 5.03–4.82 (m, 1H), 4.23–4.08 (m, 2H), 3.43–3.28 (m, 5H), 1.11 (d,  $J = 6.5$  Hz, 3H);  $^{13}\text{C}$  NMR (100 MHz,  $\text{CDCl}_3$ )  $\delta$  164.4, 138.4, 134.0, 133.6, 129.2, 129.1, 128.9, 74.8, 70.8, 59.2, 57.4, 16.4. IR (ATR): 2982, 2937, 2885, 1718, 1446, 1308, 1148, 1085, 727  $\text{cm}^{-1}$ . HRMS (ESI,  $m/z$ ): calcd for  $\text{C}_{14}\text{H}_{18}\text{NaO}_5\text{S}^+$  ( $\text{M}+\text{Na}$ ) $^+$ : 321.0767; Found: 321.0776.

**2,3-Dihydro-1H-inden-1-yl 2-(((phenyl)sulfonyl)methyl)acrylate (7s)**

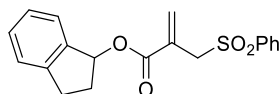

$R_f = 0.16$  (PE/EA = 8:1, v/v). White solid, mp: 70  $^{\circ}\text{C}$ –72  $^{\circ}\text{C}$ , (1.0 g, 2.6 mmol, 87% yield). NMR spectroscopy:  $^1\text{H}$  NMR (400 MHz,  $\text{CDCl}_3$ )  $\delta$  7.84 (d,  $J = 7.6$  Hz, 2H), 7.64–7.48 (m, 3H), 7.32–7.19 (m, 4H), 6.49 (s, 1H), 6.08–6.05 (m, 1H), 5.91 (s, 1H), 4.17 (s, 2H), 3.10–3.03 (m, 1H), 2.90–2.82 (m, 1H), 2.48–2.39 (m, 1H), 1.99–1.91 (m, 1H);  $^{13}\text{C}$  NMR (100 MHz,  $\text{CDCl}_3$ )  $\delta$  164.9, 144.5, 140.5, 138.5, 133.9, 133.7, 129.2, 129.2, 128.9, 126.9, 125.7, 124.9, 79.8, 57.5, 32.2, 30.3. IR (ATR): 2989, 2937, 1703, 1446, 1293, 1141, 1085, 757, 690  $\text{cm}^{-1}$ . HRMS (ESI,  $m/z$ ): calcd for  $\text{C}_{19}\text{H}_{18}\text{NaO}_4\text{S}^+$  ( $\text{M}+\text{Na}$ ) $^+$ : 365.0818; Found: 365.0829.

**Benzo[d][1,3]dioxol-5-ylmethyl 2-(((phenyl)sulfonyl)methyl)acrylate (7t)**

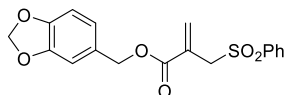

$R_f = 0.19$  (PE/EA = 4:1, v/v). White solid, mp: 87  $^{\circ}\text{C}$ –90  $^{\circ}\text{C}$ , (1.4 g, 3.9 mmol, 78% yield). NMR spectroscopy:  $^1\text{H}$  NMR (400 MHz,  $\text{CDCl}_3$ )  $\delta$  7.83 (d,  $J = 7.3$  Hz, 2H), 7.62 (t,  $J = 7.5$  Hz, 1H), 7.50 (t,  $J = 7.7$  Hz, 2H), 6.81–6.71 (m, 3H), 6.53 (s, 1H), 5.98 (s, 2H), 5.95 (s, 1H), 4.89 (s, 2H), 4.16 (s, 2H);  $^{13}\text{C}$  NMR (100 MHz,  $\text{CDCl}_3$ )  $\delta$  164.7, 147.9, 138.3, 134.1, 134.0, 129.2, 129.1, 128.9, 128.9, 122.5, 109.2, 108.4, 101.4, 67.3, 57.5. IR (ATR): 2960, 2926, 1715, 1491, 1256, 1141, 1085, 1036, 798, 731  $\text{cm}^{-1}$ . HRMS (ESI,  $m/z$ ): calcd for  $\text{C}_{18}\text{H}_{16}\text{NaO}_6\text{S}^+$  ( $\text{M}+\text{Na}$ ) $^+$ : 383.0560; Found: 383.0570.

**2-Idobenzyl 2-(((phenyl)sulfonyl)methyl)acrylate (7u)**

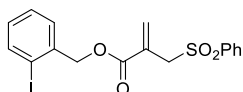

$R_f = 0.24$  (PE/EA = 4/1, v/v). White solid, mp: 85  $^{\circ}\text{C}$ –86  $^{\circ}\text{C}$ , (1.1 g, 2.6 mmol, 88% yield). NMR spectroscopy:  $^1\text{H}$  NMR (400 MHz,  $\text{CDCl}_3$ )  $\delta$  7.85 (t,  $J = 6.9$  Hz, 3H), 7.60 (t,  $J = 7.3$  Hz, 1H), 7.48 (t,  $J = 7.6$  Hz, 2H), 7.35 (t,  $J = 7.5$  Hz, 1H), 7.28 (d,  $J = 6.7$  Hz, 1H), 7.04 (t,  $J = 7.0$  Hz, 1H), 6.61 (s, 1H), 6.00 (s, 1H), 5.02 (s, 2H), 4.19 (s, 2H);  $^{13}\text{C}$  NMR (100 MHz,  $\text{CDCl}_3$ )  $\delta$  164.5, 139.7, 137.9, 134.4, 134.0, 130.2, 129.9, 129.2, 128.9, 128.8, 128.5, 98.6, 70.9, 57.5. IR (ATR): 2982, 2933, 1718, 1305, 1148, 1407, 760, 690  $\text{cm}^{-1}$ . HRMS (ESI,  $m/z$ ): calcd for  $\text{C}_{17}\text{H}_{15}\text{INaO}_4\text{S}^+$  ( $\text{M}+\text{Na}$ ) $^+$ : 464.9628; Found: 464.9646.

**4-Bromobenzyl 2-(((phenyl)sulfonyl)methyl)acrylate (7v)**

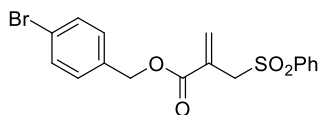

$R_f = 0.47$  (PE/EA = 2/1, v/v). White solid, mp: 64 °C–66 °C, (1.1 g, 2.7 mmol, 68% yield). NMR spectroscopy:  $^1\text{H}$  NMR (400 MHz,  $\text{CDCl}_3$ )  $\delta$  7.83 (d,  $J = 7.6$  Hz, 2H), 7.61 (t,  $J = 7.5$  Hz, 1H), 7.50–7.47 (m, 4H), 7.16 (d,  $J = 7.9$  Hz, 2H), 6.54 (s, 1H), 5.94 (s, 1H), 4.97 (s, 2H), 4.16 (s, 2H);  $^{13}\text{C}$  NMR (100 MHz,  $\text{CDCl}_3$ )  $\delta$  164.7, 138.4, 134.4, 134.2, 134.0, 131.9, 130.1, 129.2, 128.9, 128.8, 122.6, 77.5, 77.2, 76.8, 66.6, 57.5. IR (ATR): 2933, 2930, 1715, 1446, 1293, 1337, 1085, 753, 686  $\text{cm}^{-1}$ . HRMS (ESI, m/z): calcd for  $\text{C}_{17}\text{H}_{15}\text{BrNaO}_5\text{S}^+$  ( $\text{M}+\text{Na}$ ) $^+$ : 416.9767; Found: 416.9783.

#### Cyclohexylpropyl 2-((phenyl)sulfonyl)methylacrylate (7x)

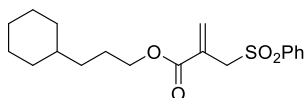

$R_f = 0.59$  (DCM). White solid, mp: 57 °C–59 °C, (1.2 g, 3.5 mmol, 69% yield). NMR spectroscopy:  $^1\text{H}$  NMR (400 MHz,  $\text{CDCl}_3$ )  $\delta$  7.84 (d,  $J = 7.4$  Hz, 2H), 7.63 (t,  $J = 7.4$  Hz, 1H), 7.52 (t,  $J = 7.7$  Hz, 2H), 6.49 (s, 1H), 5.90 (s, 1H), 4.15 (s, 2H), 3.90 (t,  $J = 6.8$  Hz, 2H), 1.73–1.60 (m, 5H), 1.58–1.47 (m, 2H), 1.27–1.08 (m, 6H), 0.94–0.75 (m, 2H);  $^{13}\text{C}$  NMR (100 MHz,  $\text{CDCl}_3$ )  $\delta$  164.9, 138.4, 134.0, 133.4, 129.1, 128.8, 66.1, 57.6, 37.3, 33.5, 33.3, 26.7, 26.4, 25.8. IR (ATR): 2930, 2848, 1715, 1472, 1320, 1148, 1085  $\text{cm}^{-1}$ . HRMS (ESI, m/z): calcd for  $\text{C}_{19}\text{H}_{26}\text{NaO}_4\text{S}^+$  ( $\text{M}+\text{Na}$ ) $^+$ : 373.1444; Found: 373.1450.

#### Adamantan-2-yl 2-((phenyl)sulfonyl)methylacrylate (7y)

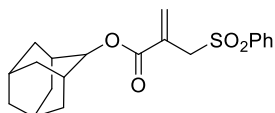

$R_f = 0.46$  (PE/EA = 4/1, v/v). White solid, mp: 75 °C–78 °C, (1.3 g, 3.5 mmol, 88% yield). NMR spectroscopy:  $^1\text{H}$  NMR (400 MHz,  $\text{CDCl}_3$ )  $\delta$  7.85 (d,  $J = 7.3$  Hz, 2H), 7.62 (t,  $J = 7.4$  Hz, 1H), 7.52 (t,  $J = 7.7$  Hz, 2H), 6.55 (s, 1H), 5.95 (s, 1H), 4.79 (s, 1H), 4.19 (s, 2H), 1.98–1.48 (m, 14H);  $^{13}\text{C}$  NMR (100 MHz,  $\text{CDCl}_3$ )  $\delta$  164.1, 138.4, 133.9, 133.2, 129.6, 129.1, 128.9, 78.5, 57.4, 37.3, 36.3, 32.0, 31.7, 27.2, 26.9. IR (ATR): 2907, 2855, 1707, 1446, 1297, 1141, 984, 895, 757, 686  $\text{cm}^{-1}$ . HRMS (ESI, m/z): calcd for  $\text{C}_{20}\text{H}_{24}\text{NaO}_4\text{S}^+$  ( $\text{M}+\text{Na}$ ) $^+$ : 383.1288; Found: 383.1303.

#### N,N-diphenyl 2-((phenyl)sulfonyl)methylacrylamide (7z)

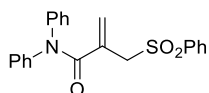

$R_f = 0.28$  (PE/EA = 2/1, v/v). White solid, mp: 154 °C–155 °C, (0.9 g, 2.4 mmol, 60% yield after recrystallization). NMR spectroscopy:  $^1\text{H}$  NMR (400 MHz,  $\text{CDCl}_3$ )  $\delta$  7.91 (d,  $J = 7.6$  Hz, 2H), 7.64 (t,  $J = 7.3$  Hz, 1H), 7.53 (t,  $J = 7.6$  Hz, 2H), 7.37–7.33 (m, 4H), 7.27–7.24 (m, 6H), 5.69 (s, 1H), 5.33 (s, 1H), 3.84 (s, 2H);  $^{13}\text{C}$  NMR (100 MHz,  $\text{CDCl}_3$ )  $\delta$  167.7, 143.3, 138.5, 134.0, 133.7, 131.4, 129.5, 129.2, 128.7, 127.6, 127.0, 60.1. IR (ATR): 1651, 1625, 1364, 1305, 1148, 1081, 760, 690  $\text{cm}^{-1}$ . HRMS (ESI, m/z): calcd for  $\text{C}_{22}\text{H}_{19}\text{NNaO}_3\text{S}^+$  ( $\text{M}+\text{Na}$ ) $^+$ : 400.0978; Found: 400.0991.

#### Cyclobutyl 2-((phenyl)sulfonyl)methylacrylate (7ae)

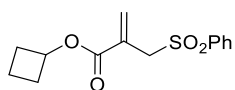

$R_f = 0.14$  (PE/EA = 8:1, v/v). White solid, mp: 43 °C–45 °C, (0.5 g, 1.7 mmol, 57% yield). NMR spectroscopy:  $^1\text{H}$  NMR (400 MHz,  $\text{CDCl}_3$ )  $\delta$  7.84 (d,  $J = 7.5$  Hz, 2H), 7.64 (t,  $J = 7.4$  Hz, 1H), 7.53 (t,  $J = 7.7$  Hz, 2H), 6.50 (s, 1H), 5.92 (s, 1H), 4.76 (p,  $J = 7.5$  Hz, 1H), 4.14 (s, 2H), 2.30–2.16 (m, 2H), 2.01–1.84 (m, 2H), 1.81–1.68 (m, 1H), 1.63–1.50 (m, 1H);  $^{13}\text{C}$  NMR (100 MHz,  $\text{CDCl}_3$ )  $\delta$  164.1, 138.4, 134.0, 133.7, 129.2, 129.1, 128.9, 69.9, 57.5, 30.1, 13.5. IR (ATR): 2989, 2937,

1722, 1450, 1323, 1249, 1144, 1070, 753, 686  $\text{cm}^{-1}$ . HRMS (ESI,  $m/z$ ): calcd for  $\text{C}_{14}\text{H}_{18}\text{NaO}_4\text{S}^+$  ( $\text{M}+\text{Na}$ ) $^+$ : 303.0662; Found: 303.0668.

**(1S,2R,5S)-2-Isopropyl-5-methylcyclohexyl 2-((phenylsulfonyl)methyl)acrylate (7ai)**

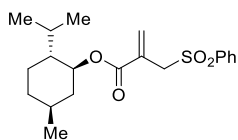

$R_f = 0.50$  (PE/EA = 4:1, v/v). Colorless oil, (1.2 g, 3.2 mmol, 79% yield). NMR spectroscopy:  $^1\text{H}$  NMR (400 MHz,  $\text{CDCl}_3$ )  $\delta$  7.85 (dt,  $J = 8.2, 1.6$  Hz, 2H), 7.64–7.60 (m, 1H), 7.52 (t,  $J = 7.5$  Hz, 2H), 6.48 (d,  $J = 0.6$  Hz, 1H), 5.96 (d,  $J = 0.6$  Hz, 1H), 4.58–4.52 (m, 1H), 4.17 (s, 2H), 1.77–1.69 (m, 2H), 1.67–1.62 (m, 2H), 1.45–1.33 (m, 2H), 1.05–0.95 (m, 1H), 0.88–0.77 (m, 8H), 0.67 (d,  $J = 7.0$  Hz, 3H);  $^{13}\text{C}$  NMR (100 MHz,  $\text{CDCl}_3$ )  $\delta$  164.4, 138.5, 134.0, 133.1, 129.4, 129.2, 128.9, 75.8, 57.3, 47.0, 40.6, 34.2, 31.4, 26.5, 23.6, 22.1, 20.8, 16.6. IR (ATR): 2952, 2930, 2870, 1711, 1446, 1312, 1245, 1193, 1144, 1085, 794, 753  $\text{cm}^{-1}$ . HRMS (ESI,  $m/z$ ): calcd for  $\text{C}_{20}\text{H}_{28}\text{NaO}_4\text{S}^+$  ( $\text{M}+\text{Na}$ ) $^+$ : 387.1601; Found: 387.1599.

**(3S,5S,9S,10R,13S,14S)-5,13-Dimethyl-17-oxohexadecahydro-1H-cyclopenta[a]phenanthren-3-yl 2-((phenylsulfonyl)methyl)acrylate (7aj)**

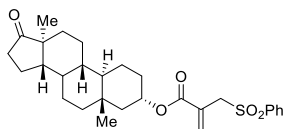

$R_f = 0.43$  (PE/EA = 2:1, v/v). White solid, mp: 147 °C–148 °C, (1.0 g, 2.0 mmol, 90% yield). NMR spectroscopy:  $^1\text{H}$  NMR (400 MHz,  $\text{CDCl}_3$ )  $\delta$  7.87–7.84 (m, 2H), 7.65–7.61 (m, 1H), 7.55–7.51 (m, 2H), 6.48 (d,  $J = 0.6$  Hz, 1H), 5.88 (d,  $J = 0.6$  Hz, 1H), 4.60–4.52 (m, 1H), 4.15 (s, 2H), 2.46–2.40 (m, 1H), 2.11–2.01 (m, 1H), 1.95–1.89 (m, 1H), 1.81–1.77 (m, 2H), 1.74–1.62 (m, 3H), 1.58–1.39 (m, 4H), 1.37–1.13 (m, 7H), 1.02–0.94 (m, 2H), 0.85 (s, 3H), 0.83 (s, 3H), 0.72–0.66 (m, 1H);  $^{13}\text{C}$  NMR (100 MHz,  $\text{CDCl}_3$ )  $\delta$  221.4, 164.4, 138.6, 134.0, 133.2, 129.5, 129.2, 128.9, 75.0, 57.6, 54.4, 51.5, 47.9, 44.7, 36.7, 36.0, 35.7, 35.1, 33.8, 31.6, 30.9, 28.4, 27.3, 21.9, 20.6, 13.9, 12.4. IR (ATR): 2933, 2851, 1733, 1715, 1305, 1241, 1189, 1141, 1085, 1014, 764, 705  $\text{cm}^{-1}$ . HRMS (ESI,  $m/z$ ): calcd for  $\text{C}_{29}\text{H}_{38}\text{NaO}_5\text{S}^+$  ( $\text{M}+\text{Na}$ ) $^+$ : 521.2332; Found: 521.2329.

**(8R,9S,10R,13S,14S,17S)-10,13-Dimethyl-3-oxo-2,3,6,7,8,9,10,11,12,13,14,15,16,17-tetradecahydro-1H-cyclopenta[a]phenanthren-17-yl 2-(((phenyl)sulfonyl)methyl)acrylate (7al)**

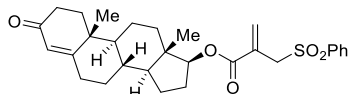

$R_f = 0.21$  (PE/EA = 2:1, v/v). White solid, mp: 133 °C–135 °C, (0.9 g, 2.6 mmol, 66% yield after recrystallization). NMR spectroscopy:  $^1\text{H}$  NMR (400 MHz,  $\text{CDCl}_3$ )  $\delta$  7.85 (d,  $J = 7.6$  Hz, 2H), 7.63 (t,  $J = 7.3$  Hz, 1H), 7.52 (t,  $J = 7.6$  Hz, 2H), 6.48 (s, 1H), 5.86 (s, 1H), 5.72 (s, 1H), 4.49 (t,  $J = 8.1$  Hz, 1H), 4.19–4.10 (m, 2H), 2.41–2.25 (m, 4H), 2.09–2.00 (m, 2H), 1.85–1.54 (m, 6H), 1.42–1.30 (m, 3H), 1.18 (s, 3H), 1.15–0.89 (m, 4H), 0.83 (s, 3H);  $^{13}\text{C}$  NMR (100 MHz,  $\text{CDCl}_3$ )  $\delta$  199.5, 170.9, 164.8, 138.5, 133.9, 133.2, 129.3, 129.2, 128.9, 124.1, 83.8, 57.5, 53.8, 50.3, 42.8, 38.7, 36.7, 35.8, 35.5, 34.0, 32.8, 31.6, 27.4, 23.6, 20.6, 17.5, 12.3. IR (ATR): 2956, 2930, 1726, 1659, 1305, 1193, 1156, 898, 708  $\text{cm}^{-1}$ . HRMS (ESI,  $m/z$ ): calcd for  $\text{C}_{29}\text{H}_{36}\text{NaO}_5\text{S}^+$  ( $\text{M}+\text{Na}$ ) $^+$ : 519.2176; Found: 519.2195.

**(4S,5'R,6aR,6bS,8aS,8bR,9S,10R,11aS,12aS,12bS)-5',6a,8a,9-Tetramethyl-1,3,3',4,4',5,5',6,6a,6b,6',7,8,8a,8b,9,11a,12,12a,12b-icosahydrospiro[naphtho[2',1':4,5]indeno[2,1-b]furan-10,2'-pyran]-4-yl 2-(((phenyl)sulfonyl)methyl)acrylate (7am)**

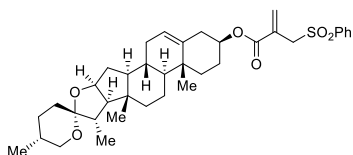

$R_f = 0.10$  (PE/EA = 10/1, v/v). Slight yellow solid, mp: 197 °C–199 °C, (2.0 g, 3.0 mmol, 76% yield after recrystallization). NMR spectroscopy:  $^1\text{H}$  NMR (400 MHz,  $\text{CDCl}_3$ )  $\delta$  7.85 (d,  $J = 7.3$  Hz, 2H), 7.64 (t,  $J = 7.3$  Hz, 1H), 7.53 (t,  $J = 7.6$  Hz, 2H), 6.49 (s, 1H), 5.91 (s, 1H), 5.33–5.29 (m, 1H), 4.49–4.38 (m, 2H), 4.16 (s, 2H), 3.48–3.34 (m, 2H), 2.22–2.16 (m, 2H), 2.01–1.95 (m, 2H), 1.88–1.71 (m, 6H), 1.68–1.57 (m, 5H), 1.53–1.43 (m, 3H), 1.32–1.06 (m, 5H), 1.02–0.91 (m, 7H), 0.78 (s, 6H);  $^{13}\text{C}$  NMR (100 MHz,  $\text{CDCl}_3$ )  $\delta$  164.3, 139.5, 138.6, 134.0, 133.3, 129.5, 129.2, 129.0, 122.7, 109.4, 80.9, 75.4, 67.0, 62.2, 57.6, 56.5, 50.0, 41.7, 40.4, 39.8, 37.9, 36.9, 36.8, 32.2, 32.0, 31.5, 30.4, 28.9, 27.6, 20.9, 19.5, 17.3, 16.4, 14.7. IR (ATR): 2941, 2855, 1711, 1446, 1331, 1193, 1051, 731, 686  $\text{cm}^{-1}$ . HRMS (ESI, m/z): calcd for  $\text{C}_{37}\text{H}_{50}\text{NaO}_6\text{S}^+$  ( $\text{M}+\text{Na}$ ) $^+$ : 645.3220; Found: 645.3210.

**(R)-2,5,7,8-Tetramethyl-2-((4R,8R)-4,8,12-trimethyltridecyl)chroman-6-yl 2-((phenylsulfonyl)methyl)acrylate (7an)**

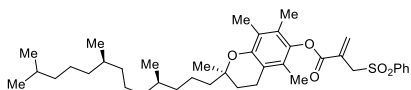

$R_f = 0.50$  (PE/EA = 4:1, v/v). White solid, mp: 43 °C–45 °C, (1.7 g, 2.6 mmol, 88% yield). NMR spectroscopy:  $^1\text{H}$  NMR (400 MHz,  $\text{CDCl}_3$ )  $\delta$  7.92 (d,  $J = 7.6$  Hz, 2H), 7.64 (t,  $J = 7.3$  Hz, 1H), 7.54 (t,  $J = 7.6$  Hz, 2H), 6.84 (s, 1H), 6.20 (s, 1H), 4.30 (s, 2H), 2.55 (t,  $J = 6.6$  Hz, 2H), 2.06 (s, 3H), 1.85 (s, 3H), 1.83 (s, 3H), 1.80–1.71 (m, 2H), 1.52–1.07 (m, 23H), 0.88–0.84 (m, 13H);  $^{13}\text{C}$  NMR (100 MHz,  $\text{CDCl}_3$ )  $\delta$  163.8, 149.7, 140.4, 138.6, 134.5, 134.1, 129.3, 128.8, 128.4, 126.8, 125.1, 123.3, 117.6, 75.2, 57.1, 39.5, 37.6, 37.4, 32.9, 28.1, 24.9, 24.6, 22.9, 22.8, 21.2, 20.7, 19.9, 19.8, 13.0, 12.1, 11.9. IR (ATR): 2922, 2863, 1733, 1446, 1320.0, 1152, 1103, 753  $\text{cm}^{-1}$ . HRMS (ESI, m/z): calcd for  $\text{C}_{39}\text{H}_{58}\text{NaO}_5\text{S}^+$  ( $\text{M}+\text{Na}$ ) $^+$ : 661.3897; Found: 661.3906.

**(8R,9S,13S,14S)-13-Methyl-17-oxo-7,8,9,11,12,13,14,15,16,17-decahydro-6H-cyclopenta[a]phenanthren-3-yl 2-((phenylsulfonyl)methyl)acrylate (7ao)**

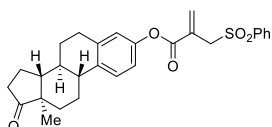

$R_f = 0.23$  (PE/EA = 2/1, v/v). Slight yellow solid, mp: 203 °C–205 °C, (1.5 g, 3.2 mmol, 79% yield). NMR spectroscopy:  $^1\text{H}$  NMR (400 MHz,  $\text{CDCl}_3$ )  $\delta$  7.91 (d,  $J = 7.6$  Hz, 2H), 7.67 (t,  $J = 7.5$  Hz, 1H), 7.56 (t,  $J = 7.6$  Hz, 2H), 7.25 (d,  $J = 10.4$  Hz, 1H), 6.72–6.63 (m, 3H), 6.08 (s, 1H), 4.26 (s, 2H), 2.88–2.86 (m, 2H), 2.54–2.47 (m, 1H), 2.41–2.38 (m, 1H), 2.29–2.27 (m, 1H), 2.17–1.95 (m, 4H), 1.66–1.41 (m, 6H), 0.91 (s, 3H);  $^{13}\text{C}$  NMR (100 MHz,  $\text{CDCl}_3$ )  $\delta$  220.8, 163.9, 148.4, 138.5, 138.2, 137.8, 135.0, 134.1, 129.3, 129.0, 128.8, 126.5, 121.4, 118.5, 57.7, 50.5, 48.1, 44.3, 38.1, 36.0, 31.7, 29.5, 26.4, 25.9, 21.7, 14.0. IR (ATR): 2933, 2881, 1722, 1495, 1301, 1245, 1133, 760, 686  $\text{cm}^{-1}$ . HRMS (ESI, m/z): calcd for  $\text{C}_{28}\text{H}_{30}\text{KO}_5\text{S}^+$  ( $\text{M}+\text{K}$ ) $^+$ : 517.1446; Found: 517.1462.

**(8R,9S,13S,14S,17S)-3-(Benzyloxy)-13-methyl-7,8,9,11,12,13,14,15,16,17-decahydro-6H-cyclopenta[a]phenanthren-17-yl 2-((phenylsulfonyl)methyl)acrylate (7ap)**

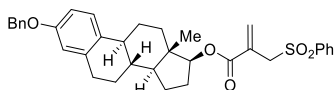

$R_f = 0.26$  (PE/EA = 4/1, v/v). Slight yellow solid, mp: 127 °C–128 °C, (1.9 g, 3.3 mmol, 83% yield). NMR spectroscopy:  $^1\text{H}$  NMR (400 MHz,  $\text{CDCl}_3$ )  $\delta$  7.88 (d,  $J = 7.9$  Hz, 2H), 7.66 (t,  $J = 7.4$  Hz, 1H), 7.55 (t,  $J = 7.7$  Hz, 2H), 7.49–7.29 (m, 5H), 7.21 (d,  $J = 8.6$  Hz, 1H), 6.80 (dd,  $J = 8.5, 2.3$  Hz, 1H), 6.73 (bs, 1H), 6.53 (s, 1H), 5.93 (s, 1H), 5.04 (s, 2H), 4.67–4.50 (m, 1H), 4.19 (q,  $J = 13.8$  Hz, 2H), 2.99–2.76 (m, 2H), 2.35–2.02 (m, 3H), 1.93–1.69 (m, 3H), 1.51–1.22 (m,

7H), 0.83 (s, 3H);  $^{13}\text{C}$  NMR (100 MHz,  $\text{CDCl}_3$ )  $\delta$  164.8, 156.8, 138.4, 138.0, 137.3, 133.9, 133.3, 132.7, 129.3, 129.2, 128.9, 128.7, 127.9, 127.5, 126.4, 114.9, 112.4, 84.0, 70.0, 57.4, 49.7, 43.8, 43.2, 38.6, 36.9, 29.8, 27.5, 27.3, 26.2, 23.3, 12.3. IR (ATR): 2945, 2848, 1711, 1495, 1312, 1189, 1152, 1085, 727  $\text{cm}^{-1}$ . HRMS (ESI,  $m/z$ ): calcd for  $\text{C}_{35}\text{H}_{38}\text{NaO}_5\text{S}^+$  ( $\text{M}+\text{Na}$ ) $^+$ : 593.2332; Found: 593.2349.

### 3.3 Synthesis of phenyl-2-(tolsulfonyl)allylic sulfone (7ab)

Phenyl-2-(tolsulfonyl)allylic sulfone **7ab** was synthesized according to reported protocol.<sup>[6]</sup>

#### Phenyl-2-(tolsulfonyl)allylic sulfone (7ab)

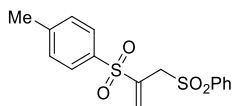

$R_f = 0.30$  (PE/EA = 2/1). White solid, mp: 125  $^{\circ}\text{C}$ –127  $^{\circ}\text{C}$ , (8.4 mmol, 84% yield for 3 steps from phenyl propargyl sulfide). NMR spectroscopy:  $^1\text{H}$  NMR (400 MHz,  $\text{CDCl}_3$ )  $\delta$  7.77–7.74 (m, 2H), 7.66 (tt,  $J = 7.5, 1.4$  Hz, 1H), 7.60 (dt,  $J = 8.3, 1.8$  Hz, 2H), 7.51 (t,  $J = 7.8$  Hz, 2H), 7.28 (d,  $J = 7.9$  Hz, 2H), 6.64 (d,  $J = 0.9$  Hz, 1H), 6.50 (d,  $J = 1.2$  Hz, 1H), 4.05 (s, 2H), 2.44 (s, 3H);  $^{13}\text{C}$  NMR (100 MHz,  $\text{CDCl}_3$ )  $\delta$  145.3, 139.8, 137.9, 134.8, 134.4, 130.8, 130.2, 129.4, 128.7, 128.6, 54.3, 21.8. IR (ATR): 2956, 2922, 2855, 1595, 1446, 1312, 1141, 1081, 727  $\text{cm}^{-1}$ . HRMS (ESI,  $m/z$ ): calcd for  $\text{C}_{16}\text{H}_{16}\text{O}_4\text{NaS}_2^+$  ( $\text{M}+\text{Na}$ ) $^+$ : 359.0382; Found: 359.0383.

#### Preparation of ((3-methyl-2-methylene-3-phenylbutyl)sulfonyl)benzene (7ad)

((3-Methyl-2-methylene-3-phenylbutyl)sulfonyl)benzene (**7ad**) was prepared according to reported methods.<sup>[7,8]</sup> Synthetic routine is shown as below:

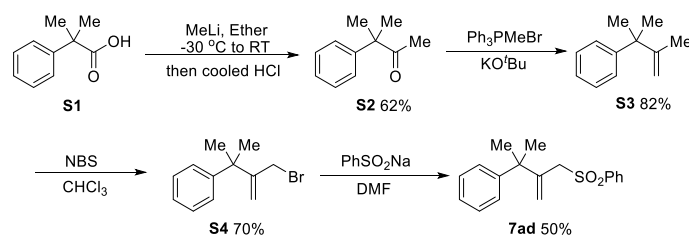

Supplementary Figure 7 Preparation of ((3-methyl-2-methylene-3-phenylbutyl)sulfonyl)benzene (**7ad**)

To a solution of 2-methyl-2-phenylpropionic acid (4.92 g, 30 mmol) in diethyl ether at  $-30$   $^{\circ}\text{C}$  was added a solution of methyl lithium (1.6 M, 56.0 mL, 3.0 equiv.) dropwise with syringe pump, after which the resulting mixture was allowed to RT and kept stirring for 1.5 h. The reaction was cooled to 0  $^{\circ}\text{C}$  and poured into iced hydrogen chloride solution, extracted with PE (3 $\times$ 100 mL), the organic phase was combined, concentrated under reduced pressure and purified with column chromatography on silica gel (siliga: 200~300 mesh) and PE as eluent to afford the colorless oil **S2** (3.0 g, 18.6 mmol, 62% yield).

To a solution of Wittig reagent prepared by  $\text{Ph}_3\text{PMeBr}$  (8.92 g, 25 mmol, 2.1 equiv.) and  $\text{NaO}^t\text{Bu}$  (2.8 g, 25 mmol, 2.1 equiv.) in THF (70 mL) stirring for 2 h at room temperature in Schlenk tube was added **S2** (1.82 g, 12 mmol) slowly. Then the resulting mixture was stirred at 60  $^{\circ}\text{C}$ . Upon full consumption of **S2** (monitored by TLC), the mixture was cooled to ambient temperature and filtered under reduced pressure, the filtrate was extracted with PE (3 $\times$ 50 mL), the organic phase was dried over  $\text{Na}_2\text{SO}_4$ , filtrated and removed the solvent, purification was conducted with column chromatography on silica gel (siliga: 200~300 mesh) and PE as eluent to afford the colorless oil **S3** (1.57 g, 9.84 mmol, 82% yield).

To a 10 mL tube was added **S3** (0.7 g, 4.3 mmol), NBS (0.84 g, 4.73 mmol, 1.1 equiv.) and chloroform (2 M), then the tube was sealed, the resulting mixture was stirred at 100  $^{\circ}\text{C}$  till NBS was completely dissolved, then the mixture was moved to ambient temperature and filtered under reduced pressure, the filtrate was washed with brine, dried over  $\text{Na}_2\text{SO}_4$ , removed solvent and purified with column chromatography on silica gel (siliga: 200~300 mesh) and PE as eluent to

afford the slight yellow oil **S4** (0.72 g, 3.0 mmol, 70% yield).

To a 50 mL round bottom flask was added **S4** (0.7g, 3.0 mmol) and phenylsulfinate (0.98 g, 6.0 mmol) and DMF (0.25 M), the resulting mixture was stirred at 60 °C for 12 h, then washed with water and brine, dried over Na<sub>2</sub>SO<sub>4</sub>, purified with column chromatography on silica gel (200~300 mesh) and PE/EA (20/1~5/1,v/v) as eluent to afford the white solid **7ad** (0.45 g, 1.5 mmol, 50% yield).

**((3-methyl-2-methylene-3-phenylbutyl)sulfonyl)benzene (7ad)** mp: 47 °C–49 °C. NMR spectroscopy: <sup>1</sup>H NMR (400 MHz, CDCl<sub>3</sub>) δ 7.80 (d, *J* = 7.3 Hz, 2H), 7.62 (t, *J* = 7.3 Hz, 1H), 7.50 (t, *J* = 7.6 Hz, 2H), 7.26–7.13 (m, 5H), 5.70 (s, 1H), 5.53 (s, 1H), 3.50 (s, 2H), 1.34 (s, 6H); <sup>13</sup>C NMR (100 MHz, CDCl<sub>3</sub>) δ 146.3, 143.2, 139.6, 133.7, 129.2, 128.6, 128.6, 126.4, 126.2, 116.7, 58.7, 44.7, 27.8. IR (ATR): 2971, 2930, 1305, 1148, 1085, 913, 768, 723, 686 cm<sup>-1</sup>. HRMS (ESI, m/z): calcd for C<sub>18</sub>H<sub>20</sub>NaO<sub>2</sub>S<sup>+</sup> (M+Na)<sup>+</sup>: 323.1076; Found: 323.1085.

#### **Preparation of 6-hydroxyhexyl 2-(((phenyl)sulfonyl)methyl)acrylate (7af)**

6-Hydroxyhexyl 2-(((phenyl)sulfonyl)methyl)acrylate was prepared according to reported method.<sup>[9]</sup>

#### **6-Hydroxyhexyl 2-(((phenyl)sulfonyl)methyl)acrylate (7af)**

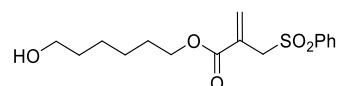

R<sub>f</sub> = 0.26 (PE/EA = 1/1, v/v). Colorless oil, (1.8 g, 5.7 mmol, 57% yield). NMR spectroscopy: <sup>1</sup>H NMR (400 MHz, CDCl<sub>3</sub>) δ 7.83 (d, *J* = 7.6 Hz, 2H), 7.63 (t, *J* = 7.3 Hz, 1H), 7.52 (t, *J* = 7.6 Hz, 2H), 6.47 (s, 1H), 5.86 (s, 1H), 4.14 (s, 2H), 3.96 (t, *J* = 6.7 Hz, 2H), 3.61 (t, *J* = 6.6 Hz, 2H), 1.75 (s, 1H), 1.55 (t, *J* = 6.7 Hz, 4H), 1.34–1.31 (m, 4H); <sup>13</sup>C NMR (100 MHz, CDCl<sub>3</sub>) δ 164.9, 138.4, 134.0, 133.4, 129.2, 128.8, 65.6, 62.7, 57.6, 32.6, 28.4, 25.7, 25.4. IR (ATR): 3541, 3422, 2933, 2859, 1715, 1308, 1189, 1148, 1085, 913, 731 cm<sup>-1</sup>. HRMS (ESI, m/z): calcd for C<sub>16</sub>H<sub>22</sub>NaO<sub>5</sub>S<sup>+</sup> (M+Na)<sup>+</sup>: 349.1080; Found: 349.1078.

#### **Preparation of 6-oxohexyl 2-(((phenyl)sulfonyl)methyl)acrylate (7ag)**

6-Oxohexyl 2-(((phenyl)sulfonyl)methyl)acrylate was prepared via oxidation of **4ax** with DMP (3.0 equiv.) in DCM at ambient temperature.

#### **6-Oxohexyl 2-(((phenyl)sulfonyl)methyl)acrylate (7ag)**

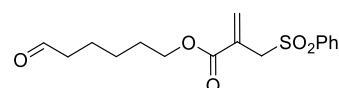

R<sub>f</sub> = 0.16 (PE/EA = 2/1, v/v). Colorless oil, (298 mg, 0.92 mmol, 46% yield). NMR spectroscopy: <sup>1</sup>H NMR (400 MHz, CDCl<sub>3</sub>) δ 9.75 (t, *J* = 1.4 Hz, 1H), 7.84 (d, *J* = 8.6 Hz, 2H), 7.63 (t, *J* = 7.5 Hz, 1H), 7.53 (t, *J* = 7.6 Hz, 2H), 6.47 (s, 1H), 5.86 (s, 1H), 4.14 (s, 2H), 3.97 (t, *J* = 6.6 Hz, 2H), 2.44 (td, *J* = 7.3, 1.4 Hz, 2H), 1.66–1.54 (m, 4H), 1.38–1.30 (m, 2H); <sup>13</sup>C NMR (100 MHz, CDCl<sub>3</sub>) δ 202.3, 164.9, 138.5, 134.0, 133.4, 129.2, 129.1, 128.8, 65.3, 57.6, 43.8, 28.3, 25.5, 21.7. IR (ATR): 2937, 2863, 1715, 1446, 1308, 1245, 1185, 1144, 1085, 757 cm<sup>-1</sup>. HRMS (ESI, m/z): calcd for C<sub>16</sub>H<sub>20</sub>NaO<sub>5</sub>S<sup>+</sup> (M+Na)<sup>+</sup>: 347.0924; Found: 347.0922.

### **synthesis of other starting materials**

#### **synthesis of acrylamides 10**

Acrylamides **10a~10i** was synthesized via condensation of corresponding amine and acyl chloride according to reported reference.<sup>[10]</sup>

#### **Synthesis of dimethyl 4-(3-(3-methyl-4-hydroxyphenyl)propyl)phthalate 15**

Dimethyl 4-(3-(3-methyl-4-hydroxyphenyl)propyl)phthalate **15** was synthesized according to reported reference<sup>[11]</sup>



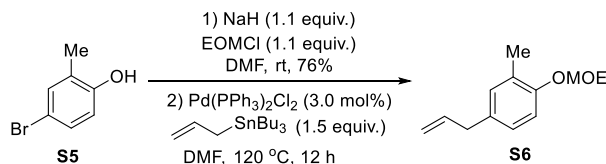

Supplementary Figure 8 Synthesis of S6

Under N<sub>2</sub> atmosphere, to a stirring mixture of NaH (3.5 g, 87 mmol, 1.1 equiv.) in DMF (30 mL) was added a solution of 4-bromo-2-methylphenol **S5** (14.8 g, 79 mmol) in DMF (100 mL) slowly, the resulting mixture was kept stirring for 0.5 h then ethoxymethyl chloride (EOMCl) (9.0 g, 95.7 mmol, 1.1 equiv) was added slowly in 10 min, the reaction medium was stirred for another 5 h and quenched by addition of water, the mixture was extracted with EA (200 mL×3 times), the combined organic phase was washed with water, dried over Na<sub>2</sub>SO<sub>4</sub>, concentrated under reduced pressure, the residue was purified through a silica plug, a yellow oil was obtained (15.3 g, 60.0 mmol, 76% yield).

The product (7.4 g, 30.0 mmol) was dissolved in DMF (65 mL), to which was added allyltributyltin (14.3 mL, 45.0 mmol, 1.5 equiv.), then the mixture is degassed, then 900 mg of dichlorobis(triphenylphosphino)palladium was added, the resulting mixture was stirred at 120 °C for 10 h. the reaction was quenched by addition of water, and extracted with EA, the combined organic layer was dried over Na<sub>2</sub>SO<sub>4</sub>, and concentrated under reduced pressure, the residue was purified by chromatography on a 10% wt K<sub>2</sub>CO<sub>3</sub>-silica column with PE as an eluent.<sup>[12]</sup> A yellow oil **S6** is obtained (5.0 g, 24 mmol, 81% yield).

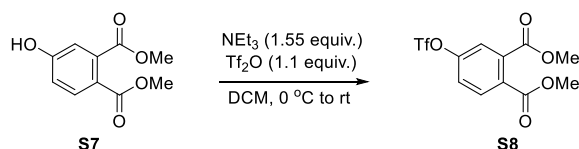

Supplementary Figure 9 Synthesis of S8

Under N<sub>2</sub> atmosphere, to a stirring solution of **S7** (8.4 g, 40 mmol), NEt<sub>3</sub> (8.4 mL, 62mmol, 1.55 equiv.) and DCM (200 mL) was added Tf<sub>2</sub>O (11.8 g, 42 mmol, 1.05 equiv.) slowly in 10 min at 0 °C, the resulting mixture was brought to room temperature and stirred for 2 h, and then quenched by addition of water and extracted with DCM (100 mL×3 times), the organic phase was washed with dilute sodium bicarbonate and dried over Na<sub>2</sub>SO<sub>4</sub>, and concentrated under reduced pressure, the residue was purified by chromatography on a silica column with PE/EA (8/1, v/v) as an eluent. A yellow oil **S8** is obtained (12.3 g, 36.0 mmol, 90% yield).

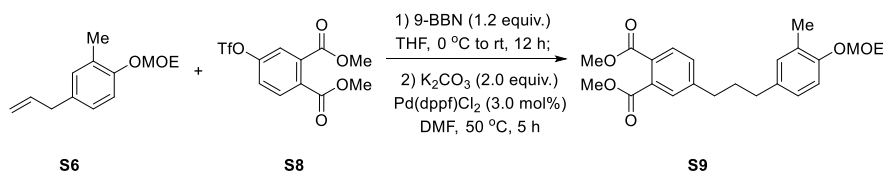

Supplementary Figure 10 Synthesis of S9

Under N<sub>2</sub> atmosphere, 3.5 g (16 mmol) of **S6** was dissolved in 40 mL anhydrous THF, the resulting mixture was cooled to 0 °C, 40.8 mL 9-BBN (0.5 M, 1.3 equiv.) was added, and the medium was brought to room temperature and stirred for 12 h. A solution of **S8** in 70 mL DMF was added, as well as 4.7 g (34 mmol, 2.1 equiv.) of potassium carbonate and Pd(dppf)Cl<sub>2</sub> (652.8 mg, 0.8 mmol, 5 mol%), the reaction mixture was degassed, heated to 50 °C for 3 h and quenched with ammonium chloride solution. The mixture was extracted with EA, the organic phase was washed with dilute sodium bicarbonate and dried over Na<sub>2</sub>SO<sub>4</sub>, and concentrated under reduced pressure, the residue was purified by chromatography on a silica column with PE/EA (8/1, v/v) as an eluent. A colorless oil **S9** is obtained (4.1 g, 10.2 mmol, 64% yield).

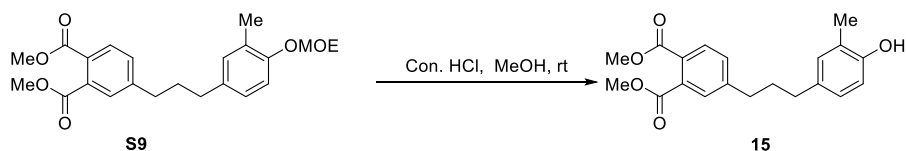

Supplementary Figure 11 Synthesis of 15

Under air atmosphere, to a solution of **S5** (2.9 g, 7.3 mmol) in MeOH (30 mL) was added con. HCl (30 mL) slowly at room temperature, the resulting mixture was stirred for 3 h and monitored by TLC, upon completion, extracted with EA, the organic phase was dried over Na<sub>2</sub>SO<sub>4</sub>, and concentrated under reduced pressure, the residue was purified by chromatography on a silica column with PE/ EA (4/1, v/v) as an eluent. A colorless oil **15** is obtained (2.3 g, 6.9 mmol, 94% yield).

## Investigation of reaction conditions

### Investigation of metallic salts

Supplementary Table 1 Investigation of metallic salts

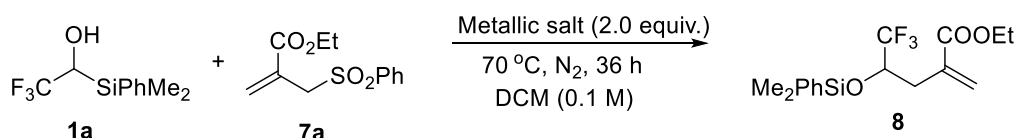

| entry | metallic salt                                                      | yield /% <sup>b,c</sup> | c.r. /% <sup>c</sup> |
|-------|--------------------------------------------------------------------|-------------------------|----------------------|
| 1     | Ce(NH <sub>4</sub> )(NO <sub>3</sub> ) <sub>6</sub>                | 0                       | 100                  |
| 2     | Ce(SO <sub>4</sub> ) <sub>2</sub> ·4H <sub>2</sub> O               | 0                       | 100                  |
| 3     | Fe(NO <sub>3</sub> ) <sub>3</sub> ·9H <sub>2</sub> O               | 0                       | 100                  |
| 4     | Fe <sub>2</sub> (SO <sub>4</sub> ) <sub>3</sub> ·xH <sub>2</sub> O | 0                       | 100                  |
| 5     | Cu(OAc) <sub>2</sub>                                               | 0                       | 6                    |
| 6     | Co(acac) <sub>3</sub>                                              | 0                       | 10                   |
| 7     | --                                                                 | 0                       | 5                    |
| 8     | Mn(OAc) <sub>3</sub> ·2H <sub>2</sub> O                            | 68                      | 92                   |
| 9     | MnF <sub>3</sub>                                                   | 0                       | 0                    |
| 10    | Mn(PO <sub>4</sub> ) <sub>3</sub>                                  | 0                       | 0                    |
| 11    | Mn(acac) <sub>3</sub>                                              | 8                       | 12                   |

a) reaction condition: **1a** (0.1 mmol), **7a** (1.2 equiv.), metallic salt (2.0 equiv.), DCM, 70 °C, N<sub>2</sub>, 36 h; b) yield by <sup>19</sup>F NMR with PhCF<sub>3</sub> as internal standard.

### Investigation of solvents

Supplementary Table 2 Investigation of solvents

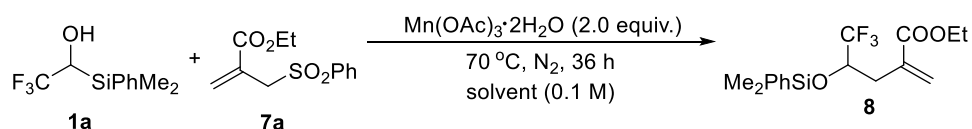

| entry | solvent    | yield /% <sup>b</sup> | c.r. /%              |
|-------|------------|-----------------------|----------------------|
| 1     | DCM        | 70 (67) <sup>c</sup>  | 90 (98) <sup>c</sup> |
| 2     | Chloroform | 10                    | 82                   |
| 3     | Hexane     | 47                    | 83                   |
| 4     | Decalin    | 56                    | 62                   |
| 5     | DMAc       | 60                    | 84                   |
| 6     | DMF        | 11                    | 59                   |
| 7     | NMP        | 10                    | 47                   |
| 8     | MeCN       | 38                    | 70                   |
| 9     | CyHexane   | 26                    | 48                   |
| 10    | MCPE       | 28                    | 50                   |
| 11    | EA         | 33                    | 65                   |

a) reaction condition: **1a** (0.1 mmol), **7a** (1.2 equiv.), Mn(OAc)<sub>3</sub>·2H<sub>2</sub>O (2.0 equiv.), solvent (0.1 M), 70 °C, N<sub>2</sub>, 36 h; b) yield by <sup>19</sup>F NMR with PhCF<sub>3</sub> as internal standard; c) repeated reaction. MCPE = methyl cyclopentyl ether.

### Investigation of oxidant for catalytic reaction conditions

Supplementary Table 3 Investigation of oxidant for catalytic reaction conditions

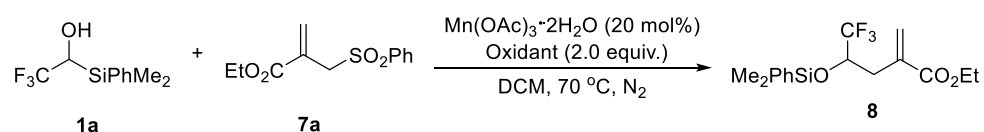

| Entry           | Oxidant            | Yield (%) | c.r (%) |
|-----------------|--------------------|-----------|---------|
| 1               | WO <sub>3</sub>    | 12        | 11      |
| 2               | NCS                | 32        | 34      |
| 3               | TEAPC              | --        | --      |
| 4               | <i>p</i> -NPO      | 0         | 0       |
| 5               | TBPB               | 60        | 75      |
| 6 <sup>c</sup>  | DCP                | 0         | 0       |
| 7 <sup>c</sup>  | TBPB               | 0         | 0       |
| 8 <sup>d</sup>  | TBPB               | 39        | 41      |
| 9 <sup>e</sup>  | TBPB               | 59        | 60      |
| 10 <sup>f</sup> | TBPB               | 64        | 81      |
| 11              | PIDA               | 8         | 100     |
| 12              | PIDTFA             | 0         | 100     |
| 13              | I <sub>2</sub>     | 0         | 0       |
| 14              | NBS                | 16        | 100     |
| 15              | MnO <sub>2</sub>   | 14        | 34      |
| 16              | NaBrO <sub>3</sub> | 20        | 55      |
| 17              | DQ                 | 6         | 31      |
| 18              | DMP                | 0         | 100     |

a) reaction condition: **1a** (0.1 mmol), **7a** (1.2 equiv.), Mn(OAc)<sub>3</sub>·2H<sub>2</sub>O (2.0 equiv.), DCM (0.1 M), 70 °C, N<sub>2</sub>, 12 h; b) yield by <sup>19</sup>F NMR with TMFB as interior label; c) absence of Mn<sup>III</sup>; d) 1.0 equiv. of TBPB was used; e) 1.5 equiv. of TBPB was used; f) 2.5 equiv. of TBPB was used; g) TEAPC = tetraethylammonium perchlorate, PIDTFA = [Bis(trifluoroacetoxy)iodo]benzene, *p*-NPO = 4-Nitropyridine N-oxide.

## Radical inhibition experiments

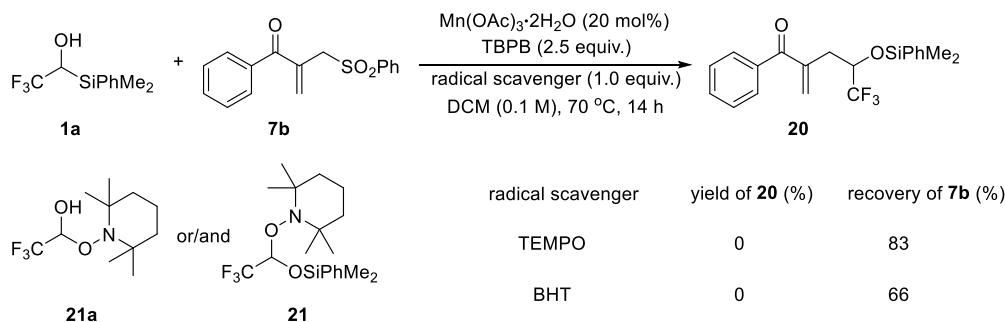

Supplementary Figure 12 Radical inhibition experiments

Under  $\text{N}_2$  atmosphere, to a dried 10 mL Schlenk tube equipped with a magnetic stir bar containing  $\text{Mn}(\text{OAc})_3 \cdot 2\text{H}_2\text{O}$  (16.1 mg, 0.06 mmol, 20 mol%), **7b** (257.4 mg, 0.9 mmol, 3.0 equiv.) and TEMPO (2,2,6,6-tetramethylpiperidine-1-oxyl) (45.7 mg, 0.3 mmol, 1.0 equiv.) or BHT (butylated hydroxytoluene) (66.1 mg, 0.3 mmol, 1.0 equiv.) was added DCM (3.0 mL, 0.1 M), **1a** (70.2 mg, 0.3 mmol) and TBPB (146.0 mg, 0.75 mmol, 2.5 equiv.) sequentially. The tube was sealed, and the resulting mixture was stirred at 70 °C in heating block for 14 h. After the mixture was cooled to ambient temperature, yield of **20** and conversion ratio of **1a** were determined via  $^{19}\text{F}$  NMR with  $\text{PhCF}_3$  as an internal standard. Recovery of **7b** was determined via  $^1\text{H}$  NMR with 1,3,5-trimethoxybenzene as an internal standard. We found reaction was totally inhibited when radical scavenger (TEMPO or BHT) was added to the mixture and compound **21** was detected by HRMS. HRMS (ESI,  $m/z$ ): calcd for  $\text{C}_{19}\text{H}_{30}\text{F}_3\text{NaNO}_2\text{Si}^+$  ( $\text{M}+\text{Na}$ ) $^+$ : 412.1890; Found:412.1899; calcd for  $\text{C}_{19}\text{H}_{31}\text{F}_3\text{NO}_2\text{Si}^+$  ( $\text{M}+\text{H}$ ) $^+$ : 390.2071; Found:390.2059.

## Proposed mechanism for allylation, alkylation and alkenylation via radical C-Si bond activation

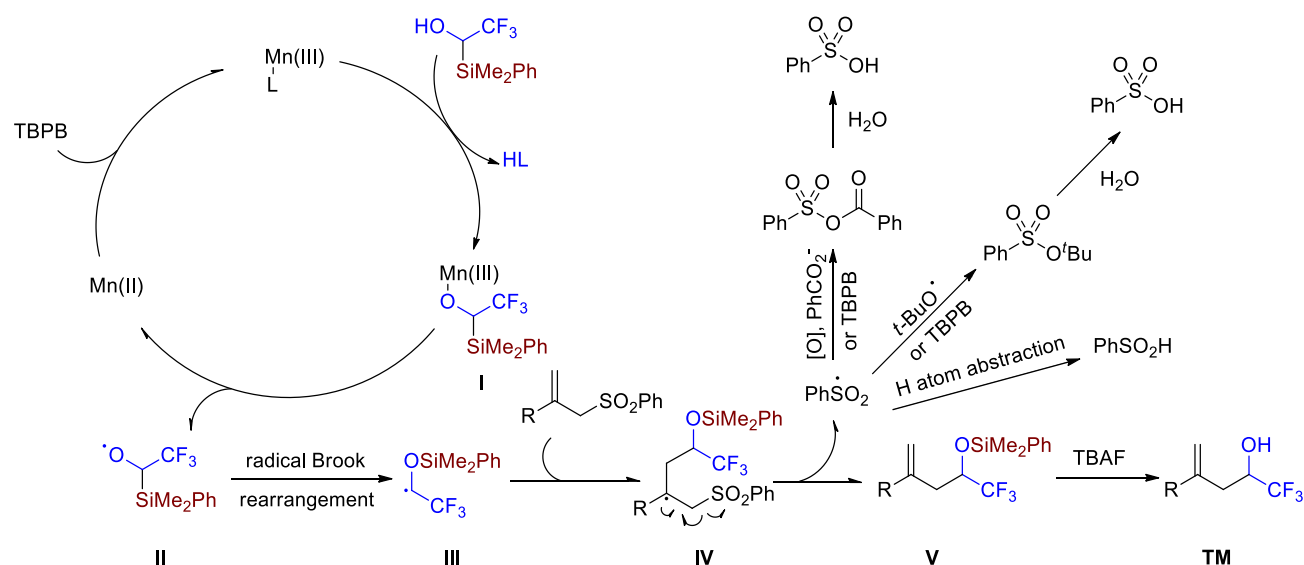

Supplementary Figure 13 Proposed Mechanism for allylation via radical C-Si activation

The radical inhibition experiments indicate that a radical process might be involved. We found that  $\text{Mn}(\text{OAc})_3 \cdot 2\text{H}_2\text{O}$  is able to mediate the reaction without external oxidant, but  $\text{Mn}(\text{OAc})_2 \cdot 4\text{H}_2\text{O}$  can not mediate the reaction without TBPB (Table 1, entries 1 and 8 in the manuscript). The HRMS analysis of the reaction mixture of **1a** and **7a** suggests the generation of benzenesulfonyl benzoic anhydride, *tert*-butyl benzenesulfonate, benzenesulfonic acid and benzenesulfinic acid as by-products. Based on these experimental results and literature about allylation from allylic sulfones,<sup>[13,14]</sup> we propose a possible mechanism (Fig. S2). Ligand exchange between  $\text{Mn}(\text{III})$  species and alcohol **1a** might generate intermediate **I**, which undergoes homolysis to produce alkoxy radical **II** and  $\text{Mn}(\text{II})$  intermediate. Carbon radical **III** would be generated through Brook rearrangement, and then undergo radical addition reaction to generate intermediate

**IV.** Compound **V** would be generated after  $\beta$ -elimination of sulfonyl radical. The alcohol product **TM** would be generated after the desilylation step. Mn(III) catalyst is likely to be regenerated by the oxidation of Mn(II) by TBPB. The sulfonyl radical is likely to be captured by TBPB, generating the side-product benzenesulfonyl benzoic anhydride. The sulfonyl radical might also be oxidized and captured by  $\text{PhCO}_2^-$  to generate benzenesulfonyl benzoic anhydride. Meanwhile, sulfonyl radical could react with TBPB or *tert*-butoxy radical to form *tert*-butyl benzenesulfonate. Benzenesulfonyl benzoic anhydride and *tert*-butyl benzenesulfonate could be hydrolyzed to generate benzenesulfonic acid. Moreover, the sulfonyl radical could be transformed to sulfenic acid via H atom abstraction reaction under the reaction condition.

Benzenesulfonyl benzoic anhydride: HRMS (ESI,  $m/z$ ): calcd for  $\text{C}_{13}\text{H}_{10}\text{NaO}_4\text{S}^+$  ( $\text{M}+\text{Na}$ ) $^+$ : 285.0192; Found: 285.0195.

*tert*-Butyl benzenesulfonate: HRMS (ESI,  $m/z$ ): calcd for  $\text{C}_{10}\text{H}_{14}\text{NaO}_3\text{S}^+$  ( $\text{M}+\text{Na}$ ) $^+$ : 237.0556; Found: 237.0561

Benzenesulfonic acid: HRMS (ESI,  $m/z$ ): calcd for  $\text{C}_6\text{H}_6\text{NaO}_2\text{S}^+$  ( $\text{M}+\text{Na}$ ) $^+$ : 164.9981; Found: 164.9975.

Benzenesulfonic acid: HRMS (ESI,  $m/z$ ): calcd for  $\text{C}_6\text{H}_7\text{O}_3\text{S}^+$  ( $\text{M}+\text{H}$ ) $^+$ : 159.0110; Found: 159.0115.

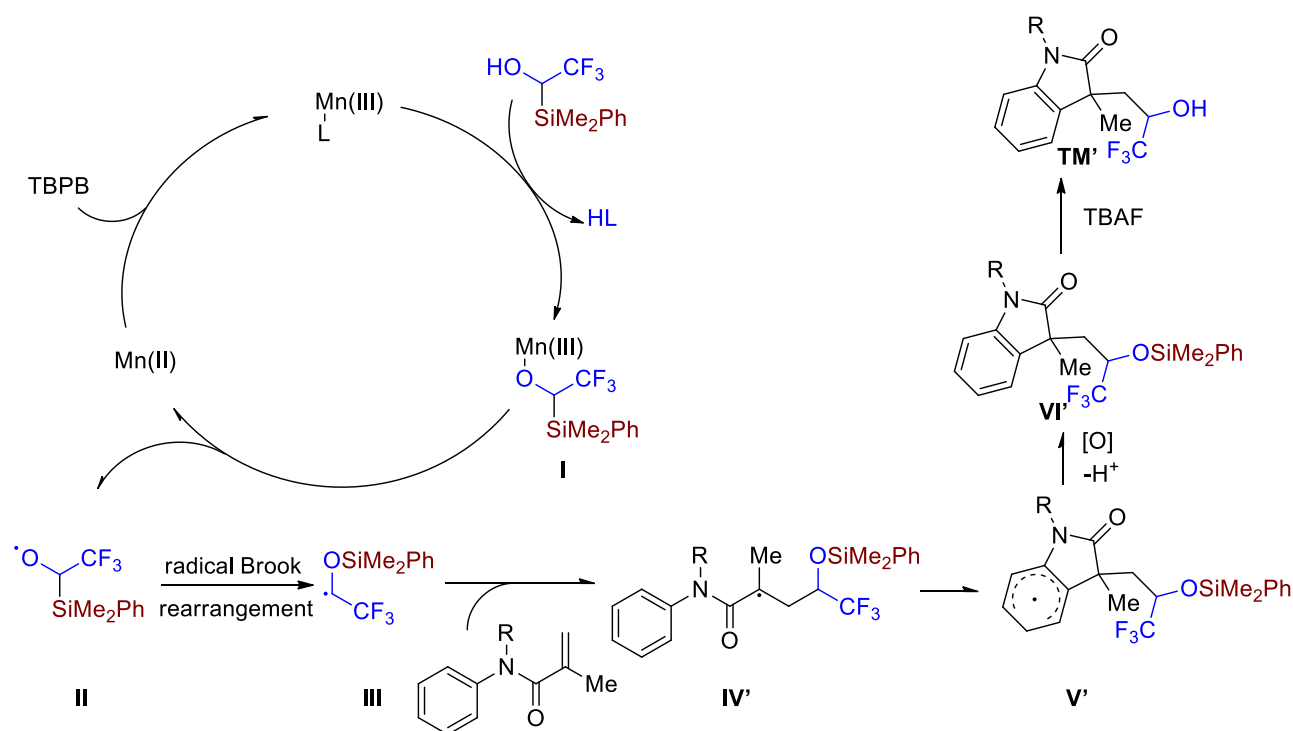

Supplementary Figure 14. Proposed Mechanism for alkylation via radical C-Si activation

For the alkylation reaction, we propose that radical **III** would be generated following similar mechanism as that in the allylation reaction (Fig. S3.). When an acryl amide was used as the radical acceptor instead of an allylic sulfone, we propose that radical **III** could undergo addition reaction to generate intermediate **IV'**, which undergo intramolecular addition to generate intermediate **V'**. Aromatization reaction via radical oxidation and deprotonation then would generate compound **VI'**. The alcohol product **TM'** would be generated after the desilylation step. Mn(III) catalyst is likely to be regenerated by the oxidation of Mn(II) by TBPB. Similar oxidative aromatization process was also proposed in the Fe and Ag catalyzed radical reactions of acryl amides. <sup>[15,16]</sup>

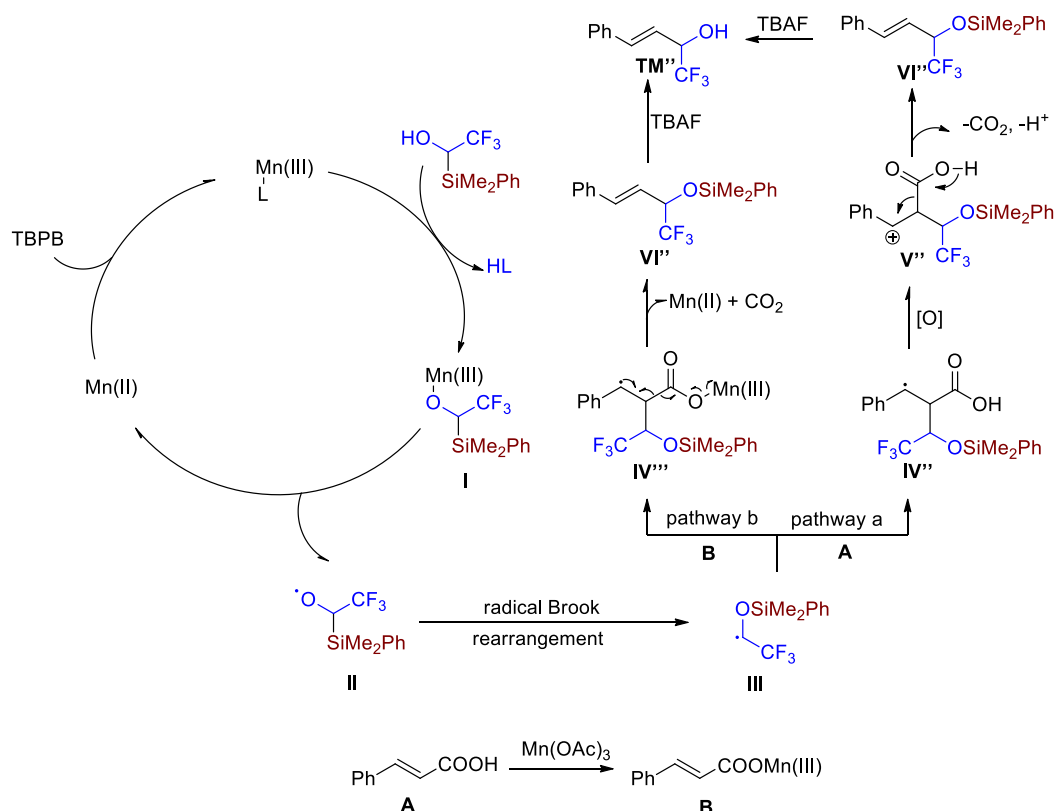

Supplementary Figure 15 Proposed Mechanism for alkenylation via radical C-Si activation

There are reports on radical decarboxylative alkenylation with  $\alpha,\beta$ -unsaturated carboxylic acids.<sup>[17,18]</sup> Based on our experimental results and literature reports,<sup>[17,18]</sup> we propose a possible mechanism for our reaction as shown in Fig. S4. Ligand exchange between Mn(III) species and alcohol **1a** might generate intermediate **I**, which undergoes homolysis to produce alkoxy radical **II** and Mn(II) intermediate. Carbon radical **III** would be generated through Brook rearrangement, and then undergo radical addition reaction via two possible pathways to generate **TM''**.

Pathway a: addition of radical **III** to the  $\alpha$ -position of the double bond in an  $\alpha,\beta$ -unsaturated carboxylic acid would generate intermediate **IV''**. Intermediate **IV''** was oxidized to cation intermediate **V''** which then eliminated carbon dioxide and proton to generate the product **VI''**. Similar proposal was proposed in Ni-catalyzed radical alkenylation with  $\alpha,\beta$ -unsaturated carboxylic acids.<sup>[17]</sup> The alcohol product **TM''** would be generated after the desilylation step.

Pathway b: compound **A** could be transformed to compound **B** via ligand exchange process. Addition of radical **III** to the  $\alpha$ -position of the double bond in compound **B** would generate intermediate **IV'''**, which then eliminate carbon dioxide and Mn(II) to generate compound **VI''**. Similar proposal was proposed in Cu-catalyzed alkenylation with  $\alpha,\beta$ -unsaturated carboxylic acids. The alcohol product **TM''** would be generated after the desilylation step.

Mn(III) catalyst is likely to be regenerated by the oxidation of Mn(II) by TBPB.

### Synthesis of $\alpha$ -CF<sub>3</sub> substituted homoallylic alcohols

#### Ethyl 5,5,5-trifluoro-4-(((dimethyl)(phenyl)silyl)oxy)-2-methylenepentanoate (**8a**)

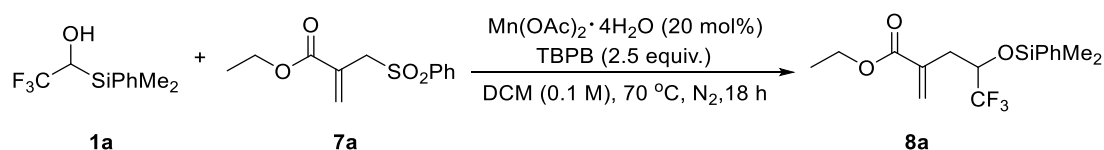

Under N<sub>2</sub> atmosphere, to a dried 10 mL Schlenk tube equipped with a magnetic stir bar containing Mn(OAc)<sub>2</sub>•4H<sub>2</sub>O (4.9 mg, 0.02 mmol, 20 mol%) was added DCM (1 mL, 0.1 M), **1a** (23.4 mg, 0.1 mmol), **7a** (50.8 mg, 0.2 mmol, 2.0 equiv.) and TBPB (48.6 mg, 0.25 mmol, 2.5 equiv.) sequentially. The tube was sealed, and the resulting mixture was kept stirring at 70 °C in heating block for 18 h. The reaction mixture was quenched with water (2 mL), extracted with DCM

(3×10 mL) and organic phase was combined and washed with brine, dried over Na<sub>2</sub>SO<sub>4</sub>, concentrated under reduced pressure. The crude product was purified with flash column chromatography on silica gel (200~300 mesh) and PE/EA (50/1~20/1, v/v) as eluent to afford 22.1 mg of the title compound as a colorless oil (64% yield).

R<sub>f</sub> = 0.60 (PE/EA = 20/1, v/v). NMR Spectroscopy: <sup>1</sup>H NMR (400 MHz, CDCl<sub>3</sub>) δ 7.52 (d, *J* = 6.4 Hz, 2H), 7.43–7.35 (m, 3H), 6.26 (s, 1H), 5.65 (s, 1H), 4.23–4.09 (m, 3H), 2.78–2.42 (m, 2H), 1.24 (t, *J* = 7.3 Hz, 3H), 0.38 (s, 6H); <sup>13</sup>C NMR (100 MHz, CDCl<sub>3</sub>) δ 166.4, 136.1, 134.9, 133.8, 130.1, 130.0, 128.0, 125.0 (q, *J* = 281.0 Hz), 70.1 (q, *J* = 30.7 Hz), 61.0, 34.6, 14.2, -1.27, -1.47; <sup>19</sup>F NMR (375 MHz, CDCl<sub>3</sub>) δ -78.5 (bs, 3F). IR (ATR): 2956, 2922, 2855, 1715, 1260, 1170, 1129, 1018, 790, 701 cm<sup>-1</sup>. HRMS (ESI, m/z): calcd for C<sub>16</sub>H<sub>22</sub>F<sub>3</sub>O<sub>3</sub>Si<sup>+</sup> (M+H)<sup>+</sup>: 347.1289; Found: 347.1273.

#### 4-((Dimethyl(phenyl)silyloxy)-5,5,5-trifluoro-2-methylene-1-phenylpentan-1-one (20)

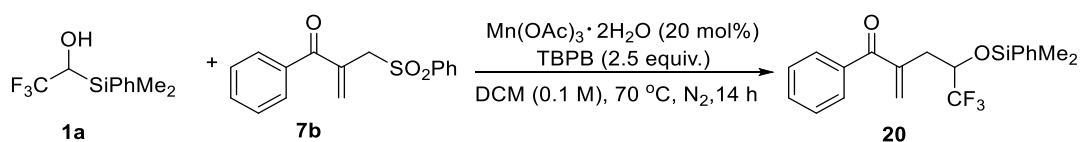

Under N<sub>2</sub> atmosphere, to a dried 10 mL Schlenk tube equipped with a magnetic stir bar containing Mn(OAc)<sub>3</sub>·2H<sub>2</sub>O (26.8 mg, 0.1 mmol, 20 mol%), **7b** (429.5 mg, 1.5 mmol, 3.0 equiv.) was added DCM (5 mL), **1a** (117.1 mg, 0.5 mmol) and TBPB (242.7 mg, 1.25 mmol, 2.5 equiv.) sequentially. The tube was then sealed, and the resulting mixture was stirred at 70 °C in a heating block for 14 h. The reaction mixture was quenched with water (2 mL) and extracted with DCM (3×10 mL). The organic phase was combined and washed with brine, dried over Na<sub>2</sub>SO<sub>4</sub>, concentrated under reduced pressure. The crude product was purified with column chromatography on silica gel (200~300 mesh) and PE/EA (20/1~10/1, v/v) as eluent to afford 149.4 mg of the title compound as a colorless oil (79% yield).

R<sub>f</sub> = 0.30 (PE/EA = 80/1, v/v). <sup>1</sup>H NMR (400 MHz, CDCl<sub>3</sub>) δ 7.55 (d, *J* = 7.5 Hz, 2H), 7.45–7.41 (m, 3H), 7.32–7.23 (m, 5H), 5.88 (s, 1H), 5.64 (s, 1H), 4.30–4.22 (m, 1H), 2.88–2.53 (m, 2H), 0.29–0.28 (m, 6H); <sup>13</sup>C NMR (100 MHz, CDCl<sub>3</sub>) δ 197.4, 141.8, 137.5, 136.5, 133.7, 132.3, 131.4, 130.1, 129.6, 128.3, 128.0, 127.8, 125.1 (q, *J* = 281.7 Hz), 70.0 (q, *J* = 30.7 Hz), 34.9, -1.2, -1.7; <sup>19</sup>F NMR (375 MHz, CDCl<sub>3</sub>) δ -77.6 (d, *J* = 6.0 Hz, 3F). IR (ATR): 3071, 2960, 1655, 1446, 1338, 1282, 1163, 1126, 1051, 790 cm<sup>-1</sup>. HRMS (ESI, m/z): calcd for C<sub>20</sub>H<sub>21</sub>F<sub>3</sub>NaO<sub>2</sub>Si<sup>+</sup> (M+Na)<sup>+</sup>: 401.1155; Found: 401.1161.

#### Ethyl 5,5,5-trifluoro-4-hydroxy-2-methylenepentanoate (9a)

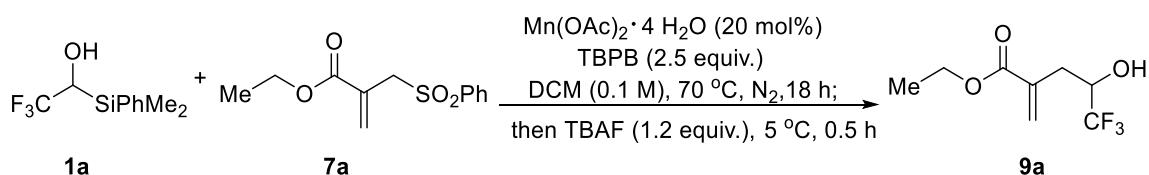

Under N<sub>2</sub> atmosphere, to a dried 10 mL Schlenk tube equipped with a magnetic stir bar containing Mn(OAc)<sub>2</sub>·4H<sub>2</sub>O (14.7 mg, 0.06 mmol, 20 mol%) was added DCM (3 mL, 0.1 M), **1a** (70.2 mg, 0.3 mmol), **7a** (152.4 mg, 0.6 mmol, 2.0 equiv.) and TBPB (145.7 mg, 0.75 mmol, 2.5 equiv.) sequentially. The tube was sealed, and the resulting mixture was kept stirring at 70 °C in heating block for 18 h. The mixture was then cooled to 5 °C with ice bath, TBAF (1.0 M in THF, 0.36 mL, 0.36 mmol, 1.2 equiv.) was added and the resulting mixture was stirred at 5 °C for 0.5 h. The reaction mixture was quenched with water (2 mL), extracted with DCM (3×10 mL) and organic phase was combined and washed with brine, dried over Na<sub>2</sub>SO<sub>4</sub>, concentrated under reduced pressure. The crude product was purified with column chromatography on silica gel (200~300 mesh) and PE/EA (20/1~10/1, v/v) as eluent to afford 40.0 mg of the title compound as a colorless oil (62% yield).

R<sub>f</sub> = 0.23 (PE/EA = 8/1, v/v). NMR Spectroscopy: <sup>1</sup>H NMR (400 MHz, CDCl<sub>3</sub>) δ 6.35 (s, 1H), 5.80 (s, 1H), 4.25 (q, *J* = 7.2 Hz, 2H), 4.16–4.08 (m, 1H), 3.63 (s, 1H), 2.78–2.57 (m, 2H), 1.32 (t, *J* = 7.2 Hz, 3H); <sup>13</sup>C NMR (100 MHz, CDCl<sub>3</sub>) δ 168.1, 135.2, 129.8, 124.9 (q, *J* = 280.5 Hz), 70.0 (q, *J* = 30.7 Hz), 61.8, 33.5, 14.2; <sup>19</sup>F NMR (375 MHz, CDCl<sub>3</sub>) δ -79.6 (d, *J* = 6.0 Hz, 3F). IR (ATR): 3444, 2986, 2937, 1700, 1633, 1413, 1316, 1275, 1163, 1126, 1021, 712 cm<sup>-1</sup>. HRMS (ESI, m/z): calcd for C<sub>8</sub>H<sub>11</sub>F<sub>3</sub>NaO<sub>3</sub><sup>+</sup> (M+Na)<sup>+</sup>: 235.0552; Found: 235.0556.

### 5,5,5-Trifluoro-4-hydroxy-2-methylene-1-phenylpentan-1-one (9b)

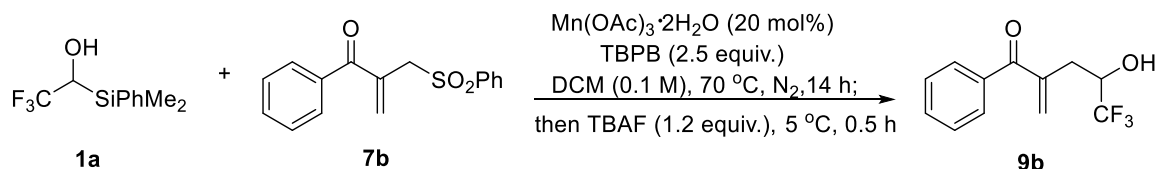

Under  $\text{N}_2$  atmosphere, to a dried 10 mL Schlenk tube equipped with a magnetic stir bar containing  $\text{Mn}(\text{OAc})_3 \cdot 2\text{H}_2\text{O}$  (16.1 mg, 0.06 mmol, 20 mol%) and **7b** (257.4 mg, 0.9 mmol, 3.0 equiv.) was added DCM (3 mL, 0.1 M), **1a** (70.2 mg, 0.3 mmol) and TBPB (145.7 mg, 0.75 mmol, 2.5 equiv.) sequentially. The tube was then sealed, and the resulting mixture was stirred at 70 °C in a heating block for 14 h, after which the mixture was cooled to 5 °C with ice bath. TBAF (1.0 M in THF, 0.36 mL, 0.36 mmol, 1.2 equiv.) was added and the mixture was stirred at 5 °C for 0.5 h. The reaction mixture was quenched with water (2 mL) and extracted with DCM (3×10 mL). The organic phase was combined and washed with brine, dried over  $\text{Na}_2\text{SO}_4$ , concentrated under reduced pressure. The crude product was purified with column chromatography on silica gel (200~300 mesh) and PE/EA (20/1~10/1, v/v) as eluent to afford 53.0 mg of the title compound as a yellow oil (71% yield).

$R_f = 0.40$  (PE/EA = 5/1, v/v).  $^1\text{H NMR}$  (400 MHz,  $\text{CDCl}_3$ )  $\delta$  7.77 (d,  $J = 7.3$  Hz, 2H), 7.60 (t,  $J = 7.3$  Hz, 1H), 7.47 (t,  $J = 7.6$  Hz, 2H), 6.16 (s, 1H), 5.90 (s, 1H), 4.32 (d,  $J = 5.2$  Hz, 1H), 4.15–4.14 (m, 1H), 2.90–2.71 (m, 2H);  $^{13}\text{C NMR}$  (100 MHz,  $\text{CDCl}_3$ )  $\delta$  199.5, 142.2, 136.7, 133.2, 131.9, 130.1, 128.5, 125.0 (q,  $J = 280.6$  Hz), 70.5 (q,  $J = 31.2$  Hz), 33.8;  $^{19}\text{F NMR}$  (375 MHz,  $\text{CDCl}_3$ )  $\delta$  -79.3 (d,  $J = 6.0$  Hz, 3F). IR (ATR): 3418, 3064, 2933, 1648, 1446, 1338, 1275, 1223, 1163, 1036, 753  $\text{cm}^{-1}$ . HRMS (ESI,  $m/z$ ): calcd for  $\text{C}_{12}\text{H}_{12}\text{F}_3\text{O}_2^+$  ( $\text{M}+\text{H}$ ) $^+$ : 245.0784; Found: 245.0778.

### 1-([1,1'-Biphenyl]-4-yl)-5,5,5-trifluoro-4-hydroxy-2-methylenepentan-1-one (9c)

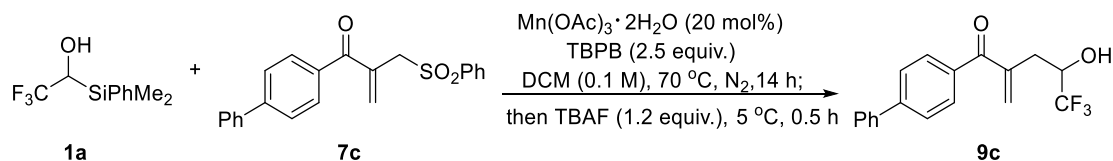

Under  $\text{N}_2$  atmosphere, to a dried 10 mL Schlenk tube equipped with a magnetic stir bar containing  $\text{Mn}(\text{OAc})_3 \cdot 2\text{H}_2\text{O}$  (16.1 mg, 0.06 mmol, 20 mol%) and **7c** (326.2 mg, 0.9 mmol, 3.0 equiv.) was added DCM (3 mL, 0.1 M), **1a** (70.2 mg, 0.3 mmol) and TBPB (145.7 mg, 0.75 mmol, 2.5 equiv.) sequentially. The tube was then sealed, and the resulting mixture was stirred at 70 °C in a heating block for 14 h, after which the mixture was cooled to 5 °C with ice bath. TBAF (1.0 M in THF, 0.36 mL, 0.36 mmol, 1.2 equiv.) was added and the mixture was stirred at 5 °C for 0.5 h. The reaction mixture was quenched with water (2 mL) and extracted with DCM (3×10 mL). The organic phase was combined and washed with brine, dried over  $\text{Na}_2\text{SO}_4$ , concentrated under reduced pressure. The crude product was purified with column chromatography on silica gel (200~300 mesh) and PE/EA (20/1~10/1, v/v) as eluent to afford 74.9 mg of the title compound as a white solid (78% yield).

### Gram scale experiment

Under  $\text{N}_2$  atmosphere, to a dried 100 mL Schlenk tube equipped with a magnetic stir bar containing  $\text{Mn}(\text{OAc})_3 \cdot 2\text{H}_2\text{O}$  (321.7 mg, 1.2 mmol, 20 mol%) and **7c** (6.52 g, 18.0 mmol, 3.0 equiv.) was added DCM (50 mL), **1a** (1.41 g, 6 mmol) and TBPB (2.91 g, 15 mmol, 2.5 equiv.) sequentially. The tube was then sealed, and the resulting mixture was stirred at 70 °C in oil bath for 14 h, after which the mixture was cooled to 5 °C with ice bath. TBAF (1.0 M in THF, 7.2 mL, 7.2 mmol, 1.2 equiv.) was added and the mixture was stirred at 5 °C for 0.5 h. The reaction mixture was quenched with water (20 mL) and extracted with DCM (3×100 mL). The organic phase was combined and washed with brine, dried over  $\text{Na}_2\text{SO}_4$ , concentrated under reduced pressure. The crude product was purified with column chromatography on silica gel (200~300 mesh) and PE/EA (20/1~10/1, v/v) as eluent to afford 1.25 g of the title compound as a white solid (65% yield) and starting material **7c** was 61% recovered (3.97 g, 11.0 mmol).

$R_f = 0.50$  (PE/EA = 5/1, v/v). mp: 69 °C–71 °C (from PE and EA).  $^1\text{H NMR}$  (400 MHz,  $\text{CDCl}_3$ )  $\delta$  7.88 (d,  $J = 8.3$  Hz,



2H), 7.69 (d,  $J = 8.3$  Hz, 2H), 7.63 (d,  $J = 7.3$  Hz, 2H), 7.49 (t,  $J = 7.3$  Hz, 2H), 7.42 (t,  $J = 7.2$  Hz, 1H), 6.18 (s, 1H), 5.95 (s, 1H), 4.38 (d,  $J = 4.9$  Hz, 1H), 4.18–4.17 (m, 1H), 2.92–2.74 (m, 2H);  $^{13}\text{C}$  NMR (100 MHz,  $\text{CDCl}_3$ )  $\delta$  199.1, 146.1, 142.3, 139.8, 135.3, 131.5, 130.8, 129.1, 128.5, 127.4, 127.2, 125.0 (q,  $J = 280.8$  Hz), 70.6 (q,  $J = 30.7$  Hz), 33.9;  $^{19}\text{F}$  NMR (375 MHz,  $\text{CDCl}_3$ )  $\delta$  -79.3 (d,  $J = 6.0$  Hz, 3F). IR (ATR): 3392, 3060, 2926, 1640, 1599, 1409, 1344, 1275, 1163, 1129, 1029, 757  $\text{cm}^{-1}$ . HRMS (ESI,  $m/z$ ): calcd for  $\text{C}_{18}\text{H}_{16}\text{F}_3\text{O}_2^+$  ( $\text{M}+\text{H}$ ) $^+$ : 321.1097; Found: 321.1096.

#### 5,5,5-Trifluoro-1-(4-fluorophenyl)-4-hydroxy-2-methylenepentan-1-one (9d)

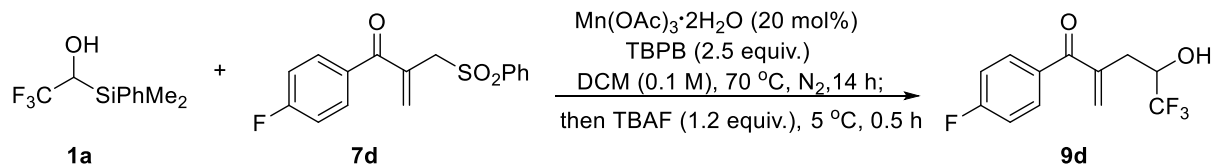

Under  $\text{N}_2$  atmosphere, to a dried 10 mL Schlenk tube equipped with a magnetic stir bar containing  $\text{Mn}(\text{OAc})_3 \cdot 2\text{H}_2\text{O}$  (16.1 mg, 0.06 mmol, 20 mol%) and **7d** (273.6 mg, 0.9 mmol, 3.0 equiv.) was added DCM (3 mL, 0.1 M), **1a** (70.2 mg, 0.3 mmol) and TBPB (145.7 mg, 0.75 mmol, 2.5 equiv.) sequentially. The tube was then sealed, and the resulting mixture was stirred at 70 °C in a heating block for 14 h, after which the mixture was cooled to 5 °C with ice bath. TBAF (1.0 M in THF, 0.36 mL, 0.36 mmol, 1.2 equiv.) was added and the mixture was stirred at 5 °C for 0.5 h. The reaction mixture was quenched with water (2 mL) and extracted with DCM (3×10 mL). The organic phase was combined and washed with brine, dried over  $\text{Na}_2\text{SO}_4$ , concentrated under reduced pressure. The crude product was purified with column chromatography on silica gel (200~300 mesh) and PE/EA (20/1~10/1, v/v) as eluent to afford 49.0 mg of the title compound as a yellow oil (62% yield).

$R_f = 0.50$  (PE/EA = 5/1, v/v).  $^1\text{H}$  NMR (400 MHz,  $\text{CDCl}_3$ )  $\delta$  7.84–7.81 (m, 2H), 7.17–7.12 (m, 2H), 6.14 (s, 1H), 5.86 (s, 1H), 4.15 (bs, 2H), 2.89–2.70 (m, 2H);  $^{13}\text{C}$  NMR (100 MHz,  $\text{CDCl}_3$ )  $\delta$  197.9, 165.9 (d,  $J = 255.3$  Hz), 142.2, 132.9 (d,  $J = 2.9$  Hz), 132.7 (d,  $J = 8.7$  Hz), 131.4, 124.9 (q,  $J = 280.8$  Hz), 115.8 (d,  $J = 22.2$  Hz), 70.4 (q,  $J = 30.8$  Hz), 33.8;  $^{19}\text{F}$  NMR (375 MHz,  $\text{CDCl}_3$ )  $\delta$  -79.4 (d,  $J = 6.0$  Hz, 3F), -104.6 (s, 1F). IR (ATR): 3425, 2930, 1644, 1416, 1338, 1275, 1156, 1129, 1029, 850  $\text{cm}^{-1}$ . HRMS (ESI,  $m/z$ ): calcd for  $\text{C}_{12}\text{H}_{11}\text{F}_4\text{O}_2^+$  ( $\text{M}+\text{H}$ ) $^+$ : 263.0690; Found: 263.0684.

#### 1-(4-Chlorophenyl)-5,5,5-trifluoro-4-hydroxy-2-methylenepentan-1-one (9e)

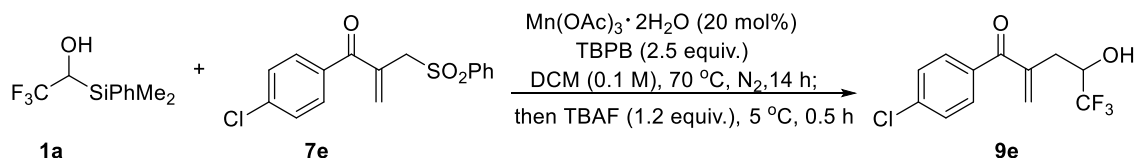

Under  $\text{N}_2$  atmosphere, to a dried 10 mL Schlenk tube equipped with a magnetic stir bar containing  $\text{Mn}(\text{OAc})_3 \cdot 2\text{H}_2\text{O}$  (16.1 mg, 0.06 mmol, 20 mol%) and **7e** (288.0 mg, 0.9 mmol, 3.0 equiv.) was added DCM (3 mL, 0.1 M), **1a** (70.2 mg, 0.3 mmol), TBPB (145.7 mg, 0.75 mmol, 2.5 equiv.) sequentially. The tube was then sealed, and the resulting mixture was stirred at 70 °C in a heating block for 14 h, after which the mixture was cooled to 5 °C with ice bath. TBAF (1.0 M in THF, 0.36 mL, 0.36 mmol, 1.2 equiv.) was added and the mixture was stirred at 5 °C for 0.5 h. The reaction mixture was quenched with water (2 mL) and extracted with DCM (3×10 mL). The organic phase was combined and washed with brine, dried over  $\text{Na}_2\text{SO}_4$ , concentrated under reduced pressure. The crude product was purified with column chromatography on silica gel (200~300 mesh) and PE/EA (20/1~10/1, v/v) as eluent to afford 57.2 mg of the title compound as a yellow oil (69% yield).

$R_f = 0.40$  (PE/EA = 5/1, v/v).  $^1\text{H}$  NMR (400 MHz,  $\text{CDCl}_3$ )  $\delta$  7.73 (d,  $J = 8.6$  Hz, 2H), 7.45 (d,  $J = 8.3$  Hz, 2H), 6.16 (s, 1H), 5.87 (s, 1H), 4.15 (s, 1H), 3.96 (s, 1H), 2.90–2.71 (m, 2H);  $^{13}\text{C}$  NMR (100 MHz,  $\text{CDCl}_3$ )  $\delta$  198.1, 142.1, 139.7, 135.0, 131.7, 131.4, 128.9, 124.9 (q,  $J = 281.8$  Hz), 70.4 (q,  $J = 30.7$  Hz), 33.8;  $^{19}\text{F}$  NMR (375 MHz,  $\text{CDCl}_3$ )  $\delta$  -79.4 (d,  $J = 8.9$  Hz, 3F). IR (ATR): 3437, 2930, 1651, 1588, 1478, 1402, 1334, 1275, 1163, 1129, 1092, 790  $\text{cm}^{-1}$ . HRMS (ESI,  $m/z$ ): calcd for  $\text{C}_{12}\text{H}_{11}\text{ClF}_3\text{O}_2^+$  ( $\text{M}+\text{H}$ ) $^+$ : 279.0394; Found: 279.0389.

### 1-(3-Chlorophenyl)-5,5,5-trifluoro-4-hydroxy-2-methylenepentan-1-one (9f)

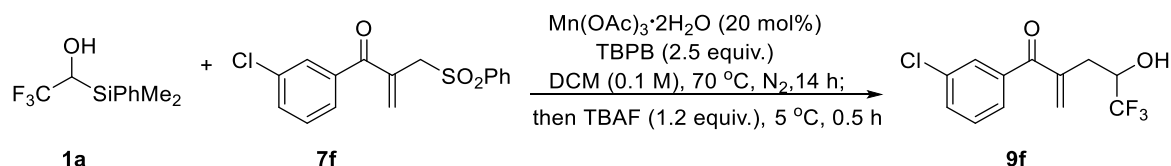

Under  $\text{N}_2$  atmosphere, to a dried 10 mL Schlenk tube equipped with a magnetic stir bar containing  $\text{Mn}(\text{OAc})_3 \cdot 2\text{H}_2\text{O}$  (16.1 mg, 0.06 mmol, 20 mol%) and **7f** (288.0 mg, 0.9 mmol, 3.0 equiv.) was added DCM (3 mL, 0.1 M), **1a** (70.2 mg, 0.3 mmol), TBPB (145.7 mg, 0.75 mmol, 2.5 equiv.) sequentially. The tube was then sealed, and the resulting mixture was stirred at 70 °C in a heating block for 14 h, after which the mixture was cooled to 5 °C with ice bath. TBAF (1.0 M in THF, 0.36 mL, 0.36 mmol, 1.2 equiv.) was added and the mixture was stirred at 5 °C for 0.5 h. The reaction mixture was quenched with water (2 mL) and extracted with DCM (3×10 mL). The organic phase was combined and washed with brine, dried over  $\text{Na}_2\text{SO}_4$ , concentrated under reduced pressure. The crude product was purified with column chromatography on silica gel (200~300 mesh) and PE/EA (20/1~10/1, v/v) as eluent to afford 65.1 mg of the title compound as a yellow oil (78% yield).

$R_f = 0.40$  (PE/EA = 5/1, v/v).  $^1\text{H}$  NMR (400 MHz,  $\text{CDCl}_3$ )  $\delta$  7.73 (s, 1H), 7.63 (d,  $J = 8.0$  Hz, 1H), 7.56 (d,  $J = 8.0$  Hz, 1H), 7.41 (t,  $J = 7.8$  Hz, 1H), 6.19 (s, 1H), 5.90 (s, 1H), 4.19–4.13 (m, 1H), 3.85 (d,  $J = 5.8$  Hz, 1H), 2.91–2.71 (m, 2H);  $^{13}\text{C}$  NMR (100 MHz,  $\text{CDCl}_3$ )  $\delta$  197.9, 142.0, 138.5, 134.8, 133.0, 132.3, 129.9, 129.9, 128.0, 124.9 (q,  $J = 280.8$  Hz), 70.2 (q,  $J = 30.9$  Hz), 33.6;  $^{19}\text{F}$  NMR (375 MHz,  $\text{CDCl}_3$ )  $\delta$  -79.4 (d,  $J = 6.0$  Hz, 3F). IR (ATR): 3418, 3071, 2930, 1651, 1420, 1334, 1275, 1163, 1129, 1033, 768  $\text{cm}^{-1}$ . HRMS (ESI, m/z): calcd for  $\text{C}_{12}\text{H}_{10}\text{ClF}_3\text{NaO}_2^+$  ( $\text{M}+\text{Na}$ ) $^+$ : 301.0214; Found: 301.0216.

### 1-(2-Chlorophenyl)-5,5,5-trifluoro-4-hydroxy-2-methylenepentan-1-one (9g)

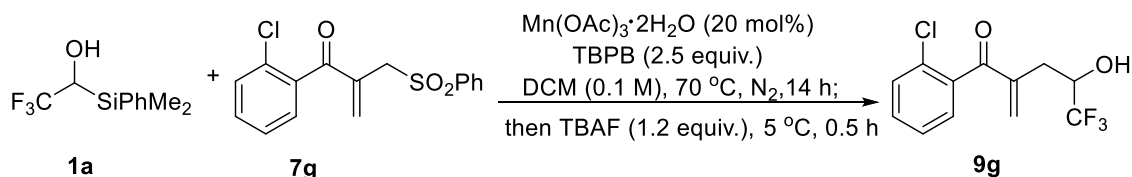

Under  $\text{N}_2$  atmosphere, to a dried 10 mL Schlenk tube equipped with a magnetic stir bar containing  $\text{Mn}(\text{OAc})_3 \cdot 2\text{H}_2\text{O}$  (16.1 mg, 0.06 mmol, 20 mol%) and **7g** (288.0 mg, 0.9 mmol, 3.0 equiv.) was added DCM (3 mL, 0.1 M), **1a** (70.2 mg, 0.3 mmol) and TBPB (145.7 mg, 0.75 mmol, 2.5 equiv.) sequentially. The tube was then sealed, and the resulting mixture was stirred at 70 °C in a heating block for 14 h, after which the mixture was cooled to 5 °C with ice bath. TBAF (1.0 M in THF, 0.36 mL, 0.36 mmol, 1.2 equiv.) was added and the mixture was stirred at 5 °C for 0.5 h. The reaction mixture was quenched with water (2 mL) and extracted with DCM (3×10 mL). The organic phase was combined and washed with brine, dried over  $\text{Na}_2\text{SO}_4$ , concentrated under reduced pressure. The crude product was purified with column chromatography on silica gel (200~300 mesh) and PE/EA (20/1~10/1, v/v) as eluent to afford 69.4 mg of the title compound as a yellow oil (83% yield).

$R_f = 0.40$  (PE/EA = 5/1, v/v).  $^1\text{H}$  NMR (400 MHz,  $\text{CDCl}_3$ )  $\delta$  7.42–7.41 (m, 2H), 7.36–7.28 (m, 2H), 6.24 (s, 1H), 5.84 (s, 1H), 4.26–4.18 (m, 1H), 3.44 (s, 1H), 2.96–2.71 (m, 2H);  $^{13}\text{C}$  NMR (100 MHz,  $\text{CDCl}_3$ )  $\delta$  198.4, 143.1, 137.7, 135.4, 131.5, 131.2, 130.2, 129.0, 126.7, 125.0 (q,  $J = 280.5$  Hz), 69.7 (q,  $J = 31.2$  Hz), 32.3;  $^{19}\text{F}$  NMR (375 MHz,  $\text{CDCl}_3$ )  $\delta$  -79.4 (d,  $J = 6.0$  Hz, 3F). IR(ATR): 3429, 3071, 2937, 1655, 1435, 1342, 1275, 1163, 1129, 1033, 746  $\text{cm}^{-1}$ . HRMS (ESI, m/z): calcd for  $\text{C}_{12}\text{H}_{11}\text{ClF}_3\text{O}_2^+$  ( $\text{M}+\text{H}$ ) $^+$ : 279.0394; Found: 279.0388.

### 1-(4-Bromophenyl)-5,5,5-trifluoro-4-hydroxy-2-methylenepentan-1-one (9h)

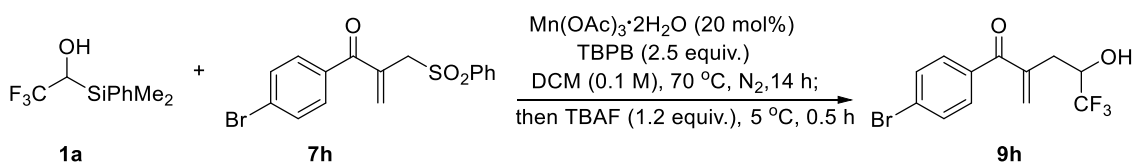

Under N<sub>2</sub> atmosphere, to a dried 10 mL Schlenk tube equipped with a magnetic stir bar containing Mn(OAc)<sub>3</sub>•2H<sub>2</sub>O (16.1 mg, 0.06 mmol, 20 mol%) and **7h** (329.0 mg, 0.9 mmol, 3.0 equiv.) was added DCM (3 mL, 0.1 M), **1a** (70.2 mg, 0.3 mmol) and TBPB (145.7 mg, 0.75 mmol, 2.5 equiv.) sequentially. The tube was then sealed, and the resulting mixture was stirred at 70 °C in a heating block for 14 h, after which the mixture was cooled to 5 °C with ice bath. TBAF (1.0 M in THF, 0.36 mL, 0.36 mmol, 1.2 equiv.) was added and the mixture was stirred at 5 °C for 0.5 h. The reaction mixture was quenched with water (2 mL) and extracted with DCM (3×10 mL). The organic phase was combined and washed with brine, dried over Na<sub>2</sub>SO<sub>4</sub>, concentrated under reduced pressure. The crude product was purified with column chromatography on silica gel (200~300 mesh) and PE/EA (20/1~10/1, v/v) as eluent to afford 78.9 mg of the title compound as a slight yellow oil (81% yield).

R<sub>f</sub> = 0.50 (PE/EA = 5/1, v/v). <sup>1</sup>H NMR (400 MHz, CDCl<sub>3</sub>) δ 7.66–7.60 (m, 4H), 6.17 (s, 1H), 5.87 (s, 1H), 4.15–4.14 (m, 1H), 3.92–3.91 (m, 1H), 2.90–2.71 (m, 2H); <sup>13</sup>C NMR (100 MHz, CDCl<sub>3</sub>) δ 198.3, 142.1, 135.5, 131.9, 131.8, 131.5, 128.4, 124.9 (q, *J* = 280.8 Hz), 70.4 (q, *J* = 30.9 Hz), 33.7; <sup>19</sup>F NMR (375 MHz, CDCl<sub>3</sub>) δ -79.4 (d, *J* = 6.0 Hz, 3F). IR (ATR): 3422, 2920, 2855, 1648, 1584, 1398, 1275, 1167, 1133, 1074, 790 cm<sup>-1</sup>. HRMS (ESI, *m/z*): calcd for C<sub>12</sub>H<sub>11</sub>BrF<sub>3</sub>O<sub>2</sub><sup>+</sup> (M+H)<sup>+</sup>: 322.9889; Found: 322.9888.

#### 5,5,5-Trifluoro-4-hydroxy-1-(4-iodophenyl)-2-methylenepentan-1-one (**9i**)

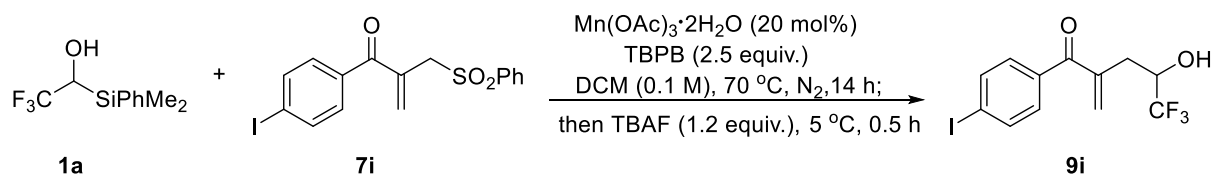

Under N<sub>2</sub> atmosphere, to a dried 10 mL Schlenk tube equipped with a magnetic stir bar containing Mn(OAc)<sub>3</sub>•2H<sub>2</sub>O (16.1 mg, 0.06 mmol, 20 mol%), **7i** (370.8 mg, 0.9 mmol, 3.0 equiv.) was added DCM (3 mL, 0.1 M), **1a** (70.2 mg, 0.3 mmol) and TBPB (145.7 mg, 0.75 mmol, 2.5 equiv.) sequentially. The tube was then sealed, and the resulting mixture was stirred at 70 °C in a heating block for 14 h, after which the mixture was cooled to 5 °C with ice bath. TBAF (1.0 M in THF, 0.36 mL, 0.36 mmol, 1.2 equiv.) was added and the mixture was stirred at 5 °C for 0.5 h. The reaction mixture was quenched with water (2 mL) and extracted with DCM (3×10 mL). The organic phase was combined and washed with brine, dried over Na<sub>2</sub>SO<sub>4</sub>, concentrated under reduced pressure. The crude product was purified with column chromatography on silica gel (200~300 mesh) and PE/EA (20/1~10/1, v/v) as eluent to afford 72.0 mg of the title compound as a colorless oil (65% yield).

R<sub>f</sub> = 0.50 (PE/EA = 5/1, v/v). <sup>1</sup>H NMR (400 MHz, CDCl<sub>3</sub>) δ 7.83 (d, *J* = 8.3 Hz, 2H), 7.48 (d, *J* = 8.3 Hz, 2H), 6.16 (s, 1H), 5.86 (s, 1H), 4.14 (s, 1H), 3.95 (d, *J* = 4.6 Hz, 1H), 2.89–2.70 (m, 2H); <sup>13</sup>C NMR (100 MHz, CDCl<sub>3</sub>) δ 198.5, 142.1, 137.9, 136.0, 131.8, 131.4, 124.9 (q, *J* = 280.8 Hz), 101.0, 70.3 (q, *J* = 31.1 Hz), 33.8; <sup>19</sup>F NMR (375 MHz, CDCl<sub>3</sub>) δ -79.4 (d, *J* = 6.0 Hz, 3F). IR (ATR): 3429, 2926, 2855, 1648, 1480, 1390, 1275, 1163, 1126, 1100, 787 cm<sup>-1</sup>. HRMS (ESI, *m/z*): calcd for C<sub>12</sub>H<sub>10</sub>F<sub>3</sub>INaO<sub>2</sub><sup>+</sup> (M+Na)<sup>+</sup>: 392.9570; Found: 392.9560.

#### 4-Bromobut-2-en-1-yl 5,5,5-trifluoro-4-hydroxy-2-methylenepentanoate (**9j**)

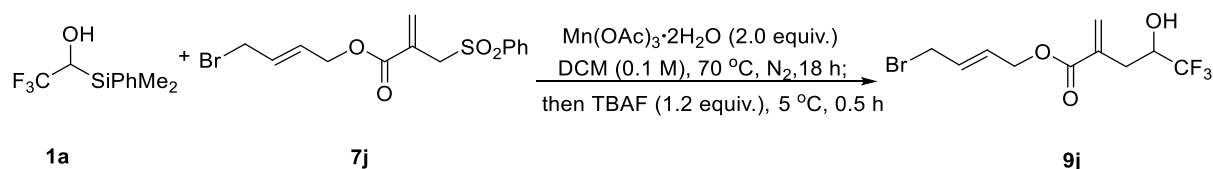

Under N<sub>2</sub> atmosphere, to a dried Schlenk tube containing Mn(OAc)<sub>3</sub>•2H<sub>2</sub>O (168.0 mg, 0.6 mmol, 2.0 equiv.), **7j** (323.1 mg, 0.9 mmol, 3.0 equiv.) was added DCM (3 mL, 0.1 M), **1a** (70.2 mg, 0.3 mmol) sequentially. The tube was sealed, and the resulting mixture was kept stirring at 70 °C in heating block for 6 h. After which the mixture was cooled to -10 °C with low temperature bath, TBAF (1.0 M in THF, 0.36 mL, 0.36 mmol, 1.2 equiv.) was added and the mixture was stirred at -10 °C for 0.5 h. The reaction mixture was quenched with water (2 mL), extracted with DCM (3×10 mL) and organic phase was combined and washed with brine, dried over Na<sub>2</sub>SO<sub>4</sub>, concentrated under reduced pressure. The crude

product was purified with column chromatography on silica gel (200~300 mesh) and PE/EA (20/1~5/1, v/v) as eluent to afford 45.7 mg of the title compound as a colorless oil (48% yield).

$R_f = 0.57$  (PE/EA = 4/1 v/v). NMR Spectroscopy:  $^1\text{H}$  NMR (400 MHz,  $\text{CDCl}_3$ )  $\delta$  6.39 (s, 1H), 5.95–5.92 (m, 2H), 5.85 (s, 1H), 4.71 (d,  $J = 4.3$  Hz, 2H), 4.18–4.07 (m, 3H), 3.28 (s, 1H), 2.80–2.58 (m, 2H);  $^{13}\text{C}$  NMR (100 MHz,  $\text{CDCl}_3$ )  $\delta$  167.5, 134.9, 130.4, 130.3, 127.9, 124.9 (q,  $J = 281.2$  Hz), 69.9 (q,  $J = 31.2$  Hz), 64.7, 43.9, 33.5.  $^{19}\text{F}$  NMR (375 MHz,  $\text{CDCl}_3$ )  $\delta$  -79.6 (d,  $J = 8.9$  Hz, 3F). IR (ATR): 3429, 2922, 2855, 2359, 2259, 1715, 1126, 783  $\text{cm}^{-1}$ . HRMS (ESI, m/z): calcd for  $\text{C}_{10}\text{H}_{12}\text{F}_3\text{O}_3^+$  (M-Br) $^+$ : 237.0733; Found: 237.0726.

#### 5,5,5-Trifluoro-4-hydroxy-1-(4-methoxyphenyl)-2-methylenepentan-1-one (9k)

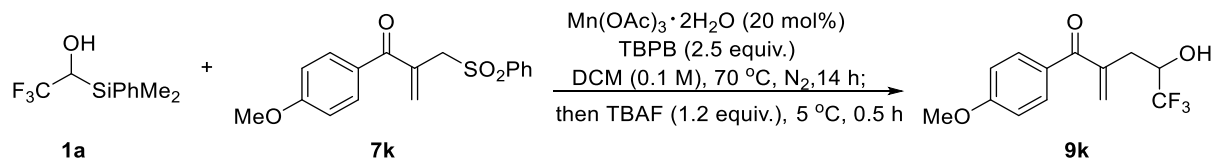

Under  $\text{N}_2$  atmosphere, to a dried 10 mL Schlenk tube equipped with a magnetic stir bar containing  $\text{Mn}(\text{OAc})_3 \cdot 2\text{H}_2\text{O}$  (16.1 mg, 0.06 mmol, 20 mol%), **7k** (284.4 mg, 0.9 mmol, 3.0 equiv.) was added DCM (3 mL, 0.1 M), **1a** (70.2 mg, 0.3 mmol) and TBPB (145.7 mg, 0.75 mmol, 2.5 equiv.) sequentially. The tube was then sealed, and the resulting mixture was stirred at 70 °C in a heating block for 14 h, after which the mixture was cooled to 5 °C with ice bath. TBAF (1.0 M in THF, 0.36 mL, 0.36 mmol, 1.2 equiv.) was added and the mixture was stirred at 5 °C for 0.5 h. The reaction mixture was quenched with water (2 mL) and extracted with DCM (3×10 mL). The organic phase was combined and washed with brine, dried over  $\text{Na}_2\text{SO}_4$ , concentrated under reduced pressure. The crude product was purified with column chromatography on silica gel (200~300 mesh) and PE/EA (20/1~10/1, v/v) as eluent to afford 56.0 mg of the title compound as a colorless oil (68% yield).

$R_f = 0.30$  (PE/EA = 5/1, v/v).  $^1\text{H}$  NMR (400 MHz,  $\text{CDCl}_3$ )  $\delta$  7.83 (d,  $J = 8.8$  Hz, 2H), 6.95 (d,  $J = 9.2$  Hz, 2H), 6.08 (s, 1H), 5.83 (s, 1H), 4.78 (d,  $J = 3.4$  Hz, 1H), 4.11 (s, 1H), 3.88 (s, 3H), 2.85–2.67 (m, 2H);  $^{13}\text{C}$  NMR (100 MHz,  $\text{CDCl}_3$ )  $\delta$  198.2, 164.1, 142.2, 132.7, 130.0, 129.0, 125.0 (q,  $J = 280.5$  Hz), 113.9, 70.8 (q,  $J = 30.9$  Hz), 55.7, 34.1;  $^{19}\text{F}$  NMR (375 MHz,  $\text{CDCl}_3$ )  $\delta$  -79.4 (d,  $J = 6.0$  Hz, 3F). IR(ATR): 3414, 2937, 2844, 1636, 1595, 1424, 1260, 1163, 1129, 1029, 794  $\text{cm}^{-1}$ . HRMS (ESI, m/z): calcd for  $\text{C}_{13}\text{H}_{14}\text{F}_3\text{O}_3^+$  (M + H) $^+$ : 275.0890; Found: 275.0880.

#### 5,5,5-Trifluoro-4-hydroxy-2-methylene-1-(4-nitrophenyl)pentan-1-one (9l)

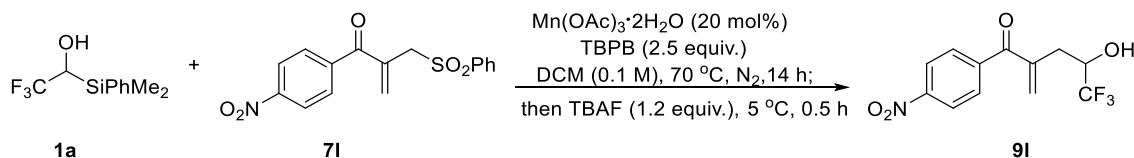

Under  $\text{N}_2$  atmosphere, to a dried 10 mL Schlenk tube equipped with a magnetic stir bar containing  $\text{Mn}(\text{OAc})_3 \cdot 2\text{H}_2\text{O}$  (16.1 mg, 0.06 mmol, 20 mol%), **7l** (297.9mg, 0.9 mmol, 3.0 equiv.) was added DCM (3 mL, 0.1 M), **1a** (70.2 mg, 0.3 mmol) and TBPB (145.7 mg, 0.75 mmol, 2.5 equiv.) sequentially. The tube was then sealed, and the resulting mixture was stirred at 70 °C in a heating block for 14 h, after which the mixture was cooled to 5 °C with ice bath. TBAF (1.0 M in THF, 0.36 mL, 0.36 mmol, 1.2 equiv.) was added and the mixture was stirred at 5 °C for 0.5 h. The reaction mixture was quenched with water (2 mL) and extracted with DCM (3×10 mL). The organic phase was combined and washed with brine, dried over  $\text{Na}_2\text{SO}_4$ , concentrated under reduced pressure. The crude product was purified with column chromatography on silica gel (200~300 mesh) and PE/EA (20/1~10/1, v/v) as eluent to afford 69.4 mg of the title compound as a yellow oil (80% yield).

$R_f = 0.30$  (PE/EA = 5/1, v/v).  $^1\text{H}$  NMR (400 MHz,  $\text{CDCl}_3$ )  $\delta$  8.31 (d,  $J = 9.0$  Hz, 2H), 7.89 (d,  $J = 9.0$  Hz, 2H), 6.27 (s, 1H), 5.88 (s, 1H), 4.21–4.20 (m, 1H), 3.37 (s, 1H), 2.96–2.76 (m, 2H);  $^{13}\text{C}$  NMR (100 MHz,  $\text{CDCl}_3$ )  $\delta$  197.1, 150.1, 142.3, 142.2, 133.2, 130.6, 124.6 (q,  $J = 281.0$  Hz), 123.7, 69.9 (q,  $J = 31.1$  Hz), 33.2;  $^{19}\text{F}$  NMR (375 MHz,  $\text{CDCl}_3$ )  $\delta$  -79.4 (d,  $J = 6.0$  Hz, 3F). IR (ATR): 3444, 3109, 2930, 1655, 1416, 1349, 1275, 1163, 1129, 1029, 753  $\text{cm}^{-1}$ . HRMS (ESI, m/z): calcd for  $\text{C}_{12}\text{H}_{10}\text{F}_3\text{NaNO}_3^+$  (M+Na) $^+$ : 312.0454; Found: 312.0450.

#### 4-(5,5,5-Trifluoro-4-hydroxy-2-methylenepentanoyl)benzotrile (9m)

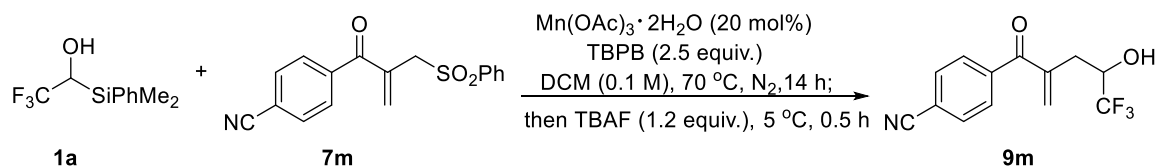

Under  $\text{N}_2$  atmosphere, to a dried 10 mL Schlenk tube equipped with a magnetic stir bar containing  $\text{Mn}(\text{OAc})_3 \cdot 2\text{H}_2\text{O}$  (16.1 mg, 0.06 mmol, 20 mol%), **7m** (280.2 mg, 0.9 mmol, 3.0 equiv.) was added DCM (3 mL, 0.1 M), **1a** (70.2 mg, 0.3 mmol) and TBPB (145.7 mg, 0.75 mmol, 2.5 equiv.) sequentially. The tube was then sealed, and the resulting mixture was stirred at 70 °C in a heating block for 14 h, after which the mixture was cooled to 5 °C with ice bath. TBAF (1.0 M in THF, 0.36 mL, 0.36 mmol, 1.2 equiv.) was added and the mixture was stirred at 5 °C for 0.5 h. The reaction mixture was quenched with water (2 mL) and extracted with DCM (3×10 mL). The organic phase was combined and washed with brine, dried over  $\text{Na}_2\text{SO}_4$ , concentrated under reduced pressure. The crude product was purified with column chromatography on silica gel (200–300 mesh) and PE/EA (20/1~10/1, v/v) as eluent to afford 65.0 mg of the title compound as a yellow oil (80% yield).

$R_f = 0.30$  (PE/EA = 5/1, v/v).  $^1\text{H}$  NMR (400 MHz,  $\text{CDCl}_3$ )  $\delta$  7.83 (d,  $J = 8.6$  Hz, 2H), 7.77 (d,  $J = 8.6$  Hz, 2H), 6.24 (s, 1H), 5.86 (s, 1H), 4.23–4.15 (m, 1H), 3.42 (s, 1H), 2.95–2.74 (m, 2H);  $^{13}\text{C}$  NMR (100 MHz,  $\text{CDCl}_3$ )  $\delta$  197.4, 142.0, 140.7, 132.9, 132.4, 130.2, 124.9 (q,  $J = 280.3$  Hz), 118.0, 116.1, 69.9 (q,  $J = 30.9$  Hz), 33.3;  $^{19}\text{F}$  NMR (375 MHz,  $\text{CDCl}_3$ )  $\delta$  -79.4 (d,  $J = 6.0$  Hz, 3F). IR (ATR): 3448, 2922, 2851, 2233, 1655, 1402, 1275, 1163, 1129, 1029, 798  $\text{cm}^{-1}$ . HRMS (ESI, m/z): calcd for  $\text{C}_{13}\text{H}_{10}\text{F}_3\text{NNaO}_2^+$  ( $\text{M}+\text{Na}$ ) $^+$ : 292.0556; Found: 292.0567.

#### 5,5,5-Trifluoro-1-(furan-2-yl)-4-hydroxy-2-methylenepentan-1-one (9n)

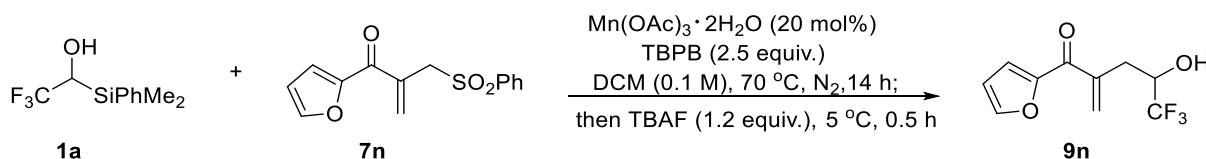

Under  $\text{N}_2$  atmosphere, to a dried 10 mL Schlenk tube equipped with a magnetic stir bar containing  $\text{Mn}(\text{OAc})_3 \cdot 2\text{H}_2\text{O}$  (16.1 mg, 0.06 mmol, 20 mol%), **7n** (248.7 mg, 0.9 mmol, 3.0 equiv.) was added DCM (3 mL, 0.1 M), **1a** (70.2 mg, 0.3 mmol) and TBPB (145.7 mg, 0.75 mmol, 2.5 equiv.) sequentially. The tube was then sealed and the resulting mixture was stirred at 70 °C in a heating block for 14 h, after which the mixture was cooled to 5 °C with ice bath. TBAF (1.0 M in THF, 0.36 mL, 0.36 mmol, 1.2 equiv.) was added and the mixture was stirred at 5 °C for 0.5 h. The reaction mixture was quenched with water (2 mL) and extracted with DCM (3×10 mL). The organic phase was combined and washed with brine, dried over  $\text{Na}_2\text{SO}_4$ , concentrated under reduced pressure. The crude product was purified with column chromatography on silica gel (200–300 mesh) and PE/EA (20/1~10/1, v/v) as eluent to afford 56.0 mg of the title compound as a yellow oil (80% yield).

$R_f = 0.40$  (PE/EA = 5/1, v/v).  $^1\text{H}$  NMR (400 MHz,  $\text{CDCl}_3$ )  $\delta$  7.71–7.70 (m, 1H), 7.26–7.25 (m, 1H), 6.59–6.58 (m, 1H), 6.27 (s, 1H), 6.07 (s, 1H), 4.15–4.07 (m, 1H), 2.83–2.65 (m, 2H);  $^{13}\text{C}$  NMR (100 MHz,  $\text{CDCl}_3$ )  $\delta$  184.7, 151.4, 148.3, 141.8, 130.0, 124.9 (q,  $J = 280.8$  Hz), 121.9, 112.6, 70.5 (q,  $J = 31.2$  Hz), 34.0;  $^{19}\text{F}$  NMR (375 MHz,  $\text{CDCl}_3$ )  $\delta$  -79.4 (d,  $J = 6.0$  Hz, 3F). IR (ATR): 3407, 3142, 2933, 1618, 1465, 1394, 1275, 1163, 1129, 1029, 768  $\text{cm}^{-1}$ . HRMS (ESI, m/z): calcd for  $\text{C}_{10}\text{H}_{10}\text{F}_3\text{O}_3^+$  ( $\text{M} + \text{H}$ ) $^+$ : 235.0577; Found: 235.0575.

#### 5,5,5-Trifluoro-4-hydroxy-2-methylene-1-(thiophen-2-yl)pentan-1-one (9o)

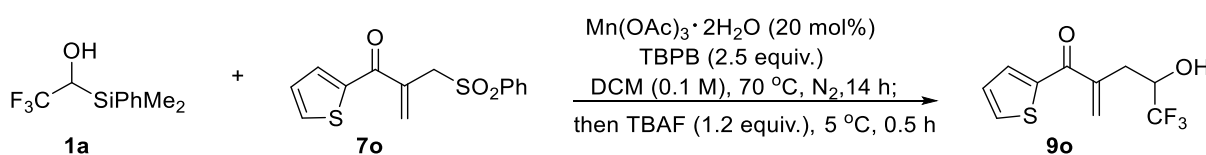

Under  $\text{N}_2$  atmosphere, to a dried 10 mL Schlenk tube equipped with a magnetic stir bar containing  $\text{Mn}(\text{OAc})_3 \cdot 2\text{H}_2\text{O}$  (16.1 mg, 0.06 mmol, 20 mol%), **7o** (261.0 mg, 0.9 mmol, 3.0 equiv.) was added DCM (3 mL, 0.1 M), **1a** (70.2 mg, 0.3

mmol) and TBPB (145.7 mg, 0.75 mmol, 2.5 equiv.) sequentially. The tube was then sealed, and the resulting mixture was stirred at 70 °C in a heating block for 14 h, after which the mixture was cooled to 5 °C with ice bath. TBAF (1.0 M in THF, 0.36 mL, 0.36 mmol, 1.2 equiv.) was added and the mixture was stirred at 5 °C for 0.5 h. The reaction mixture was quenched with water (2 mL) and extracted with DCM (3×10 mL). The organic phase was combined and washed with brine, dried over Na<sub>2</sub>SO<sub>4</sub>, concentrated under reduced pressure. The crude product was purified with column chromatography on silica gel (200~300 mesh) and PE/EA (20/1~10/1, v/v) as eluent to afford 61.4 mg of the title compound as a yellow solid (82% yield).

R<sub>f</sub> = 0.40 (PE/EA = 5/1, v/v). mp: 42 °C–44 °C (from PE and EA). <sup>1</sup>H NMR (400 MHz, CDCl<sub>3</sub>) δ 7.77–7.72 (m, 2H), 7.18–7.16 (m, 1H), 6.10 (s, 1H), 6.05 (s, 1H), 4.46 (s, 1H), 4.14–4.11 (m, 1H), 2.85–2.66 (m, 2H); <sup>13</sup>C NMR (100 MHz, CDCl<sub>3</sub>) δ 190.6, 142.4, 142.2, 135.8, 135.6, 129.3, 128.4, 124.9 (q, *J* = 280.8 Hz), 70.7 (q, *J* = 30.7 Hz), 34.1; <sup>19</sup>F NMR (375 MHz, CDCl<sub>3</sub>) δ –79.3 (d, *J* = 6.0 Hz, 3F). IR (ATR): 3418, 3101, 2930, 1614, 1513, 1413, 1357, 1275, 1163, 1129, 1055, 727 cm<sup>-1</sup>. HRMS (ESI, m/z): calcd for C<sub>10</sub>H<sub>10</sub>F<sub>3</sub>O<sub>2</sub>S<sup>+</sup> (M+H)<sup>+</sup>: 251.0348; Found: 251.0341.

#### 5,5,5-Trifluoro-4-hydroxy-2-methylene-1-(naphthalen-2-yl)pentan-1-one (9p)

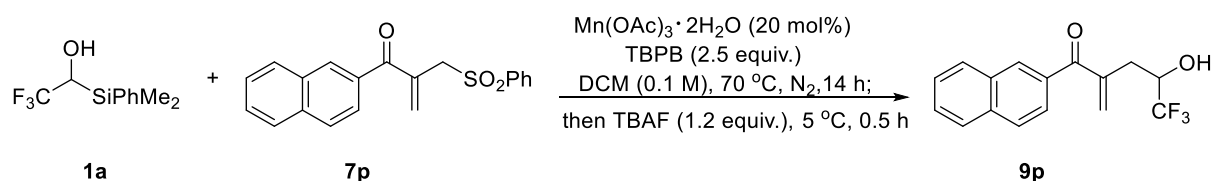

Under N<sub>2</sub> atmosphere, to a dried 10 mL Schlenk tube equipped with a magnetic stir bar containing Mn(OAc)<sub>3</sub>·2H<sub>2</sub>O (16.1 mg, 0.06 mmol, 20 mol%), **7p** (302.4 mg, 0.9 mmol, 3.0 equiv.) was added DCM (3 mL, 0.1 M), **1a** (70.2 mg, 0.3 mmol) and TBPB (145.7 mg, 0.75 mmol, 2.5 equiv.) sequentially. The tube was then sealed, and the resulting mixture was stirred at 70 °C in a heating block for 14 h, after which the mixture was cooled to 5 °C with ice bath. TBAF (1.0 M in THF, 0.36 mL, 0.36 mmol, 1.2 equiv.) was added and the mixture was stirred at 5 °C for 0.5 h. The reaction mixture was quenched with water (2 mL) and extracted with DCM (3×10 mL). The organic phase was combined and washed with brine, dried over Na<sub>2</sub>SO<sub>4</sub>, concentrated under reduced pressure. The crude product was purified with column chromatography on silica gel (200~300 mesh) and PE/EA (20/1~10/1, v/v) as eluent to afford 63.0 mg of the title compound as a white solid (72% yield).

R<sub>f</sub> = 0.40 (PE/EA = 5/1, v/v). mp: 42 °C–44 °C (from PE and EA). <sup>1</sup>H NMR (400 MHz, CDCl<sub>3</sub>) δ 8.30 (s, 1H), 7.95–7.85 (m, 4H), 7.65–7.55 (m, 2H), 6.21 (s, 1H), 5.97 (s, 1H), 4.42 (d, *J* = 5.2 Hz, 1H), 4.25–4.15 (m, 1H), 2.96–2.77 (m, 2H); <sup>13</sup>C NMR (100 MHz, CDCl<sub>3</sub>) δ 199.5, 142.4, 135.7, 133.9, 132.2, 132.1, 131.7, 129.6, 128.8, 128.7, 128.0, 127.1, 125.5, 125.0 (q, *J* = 280.7 Hz), 70.6 (q, *J* = 30.9 Hz), 34.0; <sup>19</sup>F NMR (375 MHz, CDCl<sub>3</sub>) δ –79.3 (d, *J* = 6.0 Hz, 3F). IR (ATR): 3411, 3060, 2933, 1644, 1469, 1357, 1275, 1167, 1126, 1033, 746 cm<sup>-1</sup>. HRMS (ESI, m/z): calcd for C<sub>16</sub>H<sub>14</sub>F<sub>3</sub>O<sub>2</sub><sup>+</sup> (M+H)<sup>+</sup>: 295.0940; Found: 295.0932.

#### *N,N*-diphenyl 5,5,5-trifluoro-4-hydroxy-2-methylenepentanamide (9q)

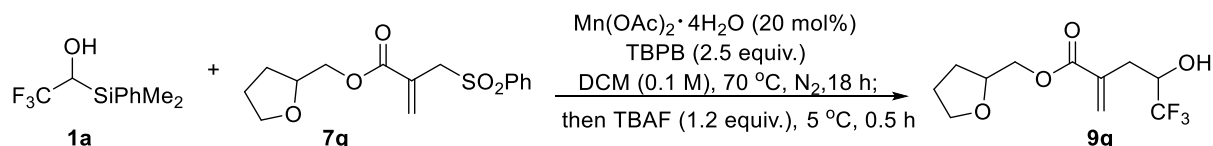

Under N<sub>2</sub> atmosphere, to a dried 10 mL Schlenk tube equipped with a magnetic stir bar containing Mn(OAc)<sub>2</sub>·4H<sub>2</sub>O (14.7 mg, 0.06 mmol, 20 mol%), **7q** (279.0 mg, 0.9 mmol, 3.0 equiv.) was added DCM (3 mL, 0.1 M), **1a** (70.2 mg, 0.3 mmol) and TBPB (145.7 mg, 0.75 mmol, 2.5 equiv.) sequentially. The tube was sealed, and the resulting mixture was kept stirring at 70 °C in heating block for 18 h. After which the mixture was cooled to 5 °C with ice bath, TBAF (1.0 M in THF, 0.36 mL, 0.36 mmol, 1.2 equiv.) was added and the mixture was stirred at 5 °C for 0.5 h. The reaction mixture was quenched with water (2 mL), extracted with DCM (3×10 mL) and organic phase was combined and washed with brine, dried over Na<sub>2</sub>SO<sub>4</sub>, concentrated under reduced pressure. The crude product was purified with column chromatography on silica gel (200~300 mesh) and PE/EA (8/1, v/v) as eluent to afford 46.0 mg of the title compound as

a colorless oil (57% yield).

$R_f = 0.24$  (PE/EA = 4/1, v/v). NMR Spectroscopy:  $^1\text{H}$  NMR (400 MHz,  $\text{CDCl}_3$ )  $\delta$  6.39 (s, 1H), 5.80 (s, 1H), 4.31–4.09 (m, 4H), 3.92–3.78 (m, 2H), 2.78–2.61 (m, 2H), 2.08–1.92 (m, 3H), 1.69–1.62 (m, 1H);  $^{13}\text{C}$  NMR (100 MHz,  $\text{CDCl}_3$ )  $\delta$  167.6, 135.1, 130.2, 125.0 (q,  $J = 281.0$  Hz), 76.5, 76.4 (C'), 70.1 (q,  $J = 30.7$  Hz, C), 70.1 (q,  $J = 30.7$  Hz, C'), 68.6, 68.6 (C'), 67.4, 67.3 (C'), 33.6, 28.0, 25.8;  $^{19}\text{F}$  NMR (375 MHz,  $\text{CDCl}_3$ )  $\delta$  -79.6 (d,  $J = 6.0$  Hz, 3F), -79.7 (d,  $J = 6.0$  Hz, 3F'). IR (ATR): 3384, 2956, 2878, 1715, 1633, 1413, 1316, 1275, 1167, 1126, 1021, 712  $\text{cm}^{-1}$ . HRMS (ESI, m/z): calcd for  $\text{C}_{11}\text{H}_{15}\text{F}_3\text{NaO}_4^+$  (M+Na) $^+$ : 290.0815; Found: 290.0810.

### 1-Methoxypropan-2-yl 5,5,5-trifluoro-4-hydroxy-2-methylenepentanoate (9r)

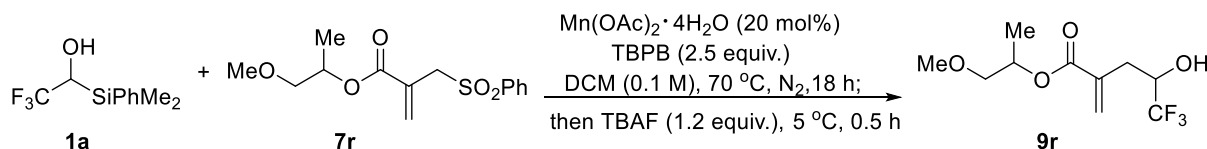

Under  $\text{N}_2$  atmosphere, to a dried 10 mL Schlenk tube equipped with a magnetic stir bar containing  $\text{Mn}(\text{OAc})_2 \cdot 4\text{H}_2\text{O}$  (24.5 mg, 0.1 mmol, 20 mol%), **7r** (298.4 mg, 1.5 mmol, 3.0 equiv.) was added DCM (5 mL, 0.1 M), **1a** (117.1 mg, 0.5 mmol) and TBPB (242.7 mg, 1.5 mmol, 2.5 equiv.) sequentially. The tube was then sealed, and the resulting mixture was stirred at 70 °C in a heating block for 18 h, after which the mixture was cooled to 5 °C with ice bath. TBAF (1.0 M in THF, 0.60 mL, 0.60 mmol, 1.2 equiv.) was added and the mixture was stirred at 5 °C for 0.5 h. The reaction mixture was quenched with water (2 mL) and extracted with DCM (3×10 mL). The organic phase was combined and washed with brine, dried over  $\text{Na}_2\text{SO}_4$ , concentrated under reduced pressure. The crude product was purified with column chromatography on silica gel (200–300 mesh) and PE/EA (20/1~10/1, v/v) as eluent to afford 93.0 mg of the title compound as a colorless oil (73% yield).

$R_f = 0.40$  (PE/EA = 5/1, v/v).  $^1\text{H}$  NMR (400 MHz,  $\text{CDCl}_3$ )  $\delta$  6.35–6.34 (m, 1H), 5.77–5.74 (m, 1H), 5.19–5.10 (m, 1H), 4.20–4.00 (m, 1H), 3.52–3.36 (m, 6H), 2.88–2.81 (m, 2H), 1.28 (d,  $J = 6.4$  Hz, 3H);  $^{13}\text{C}$  NMR (100 MHz,  $\text{CDCl}_3$ )  $\delta$  167.3, 167.2 (C'), 135.8, 135.3 (C'), 130.0, 129.4 (C'), 125.0 (q,  $J = 281.5$  Hz), 75.0, 75.0 (C'), 70.8, 70.7, 70.6 (q,  $J = 28.7$  Hz), 69.7 (q,  $J = 29.2$  Hz, C'), 59.2, 59.1 (C'), 33.6, 33.3 (C'), 16.5, 16.5 (C');  $^{19}\text{F}$  NMR (375 MHz,  $\text{CDCl}_3$ )  $\delta$  -77.0 (d,  $J = 8.9$  Hz, 3F), -77.4 (d,  $J = 8.9$  Hz, 3F'). IR (ATR): 3422, 2986, 2937, 2889, 1711, 1633, 1454, 1275, 1170, 1126, 1033, 708  $\text{cm}^{-1}$ . HRMS (ESI, m/z): calcd for  $\text{C}_{10}\text{H}_{15}\text{F}_3\text{NaO}_4^+$  (M+Na) $^+$ : 279.0814; Found: 279.0808.

### 2,3-Dihydro-1H-inden-1-yl 5,5,5-trifluoro-4-hydroxy-2-methylenepentanoate (9s)

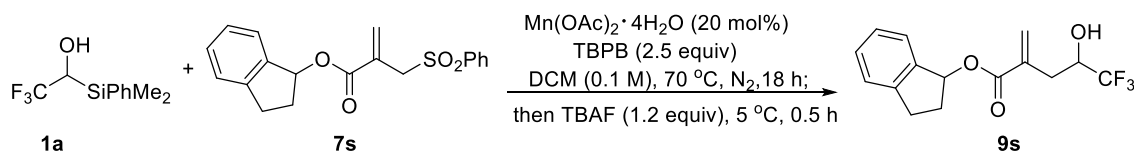

Under  $\text{N}_2$  atmosphere, to a dried 10 mL Schlenk tube equipped with a magnetic stir bar containing  $\text{Mn}(\text{OAc})_2 \cdot 4\text{H}_2\text{O}$  (14.7 mg, 0.06 mmol, 20 mol%), **7s** (205.2 mg, 0.6 mmol, 2.0 equiv.) was added DCM (3 mL, 0.1 M), **1a** (70.2 mg, 0.3 mmol) and TBPB (145.7 mg, 0.75 mmol, 2.5 equiv.) sequentially. The tube was sealed, and the resulting mixture was kept stirring at 70 °C in heating block for 18 h. After which the mixture was cooled to 5 °C with ice bath, TBAF (1.0 M in THF, 0.36 mL, 0.36 mmol, 1.2 equiv.) was added and the mixture was stirred at 5 °C for 0.5 h. The reaction mixture was quenched with water (2 mL), extracted with DCM (3×10 mL) and organic phase was combined and washed with brine, dried over  $\text{Na}_2\text{SO}_4$ , concentrated under reduced pressure. The crude product was purified with column chromatography on silica gel (200–300 mesh) and PE/EA (20/1, v/v) as eluent to afford 66.0 mg of the title compound as a colorless oil (73% yield).

$R_f = 0.30$  (PE/EA = 8/1, v/v). NMR Spectroscopy:  $^1\text{H}$  NMR (400 MHz,  $\text{CDCl}_3$ )  $\delta$  7.43 (d,  $J = 7.3$  Hz, 1H), 7.35–7.31 (m, 2H), 7.25 (t,  $J = 6.3$  Hz, 1H), 6.32–6.28 (m, 2H), 5.79 (s, 1H), 4.14–4.12 (m, 1H), 3.67 (s, 1H), 3.18–3.11 (m, 1H), 2.96–2.89 (m, 1H), 2.80–2.76 (m, 1H), 2.66–2.52 (m, 2H), 2.20–2.13 (m, 1H);  $^{13}\text{C}$  NMR (100 MHz,  $\text{CDCl}_3$ )  $\delta$  168.1, 144.6, 140.6, 135.3, 130.1, 130.0 (C'), 129.4, 127.0, 125.8, 125.7 (C'), 125.0, 124.9 (q,  $J = 280.8$  Hz), 79.9, 71.2 (q,  $J = 30.9$  Hz, C), 70.1 (q,  $J = 31.2$  Hz, C'), 33.6, 32.4, 30.3;  $^{19}\text{F}$  NMR (375 MHz,  $\text{CDCl}_3$ )  $\delta$  -79.5–-79.5 (m, 3F, 3F'). IR

(ATR): 3425, 2941, 2855, 1703, 1633, 1435, 1320, 1275, 1170, 1126, 1014, 708  $\text{cm}^{-1}$ . HRMS (ESI,  $m/z$ ): calcd for  $\text{C}_{15}\text{H}_{15}\text{F}_3\text{NaO}_3^+$  ( $M+\text{Na}$ ) $^+$ : 323.0866; Found: 323.0867.

**Benzo[d][1,3]dioxol-5-ylmethyl 5,5,5-trifluoro-4-hydroxy-2-methylenepentanoate (9t)**

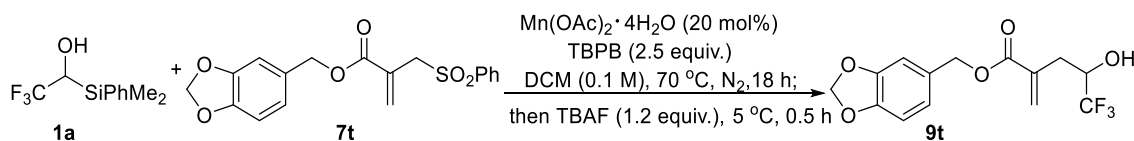

Under  $\text{N}_2$  atmosphere, to a dried 10 mL Schlenk tube equipped with a magnetic stir bar containing  $\text{Mn}(\text{OAc})_2 \cdot 4\text{H}_2\text{O}$  (14.7 mg, 0.06 mmol, 20 mol%), **7t** (216 mg, 0.6 mmol, 2.0 equiv.) was added DCM (3 mL, 0.1 M), **1a** (70.2 mg, 0.3 mmol) and TBPB (145.7 mg, 0.75 mmol, 2.5 equiv.) sequentially. The tube was sealed, and the resulting mixture was kept stirring at  $70^\circ\text{C}$  in heating block for 18 h. After which the mixture was cooled to  $5^\circ\text{C}$  with ice bath, TBAF (1.0 M in THF, 0.36 mL, 0.36 mmol, 1.2 equiv.) was added and the mixture was stirred at  $5^\circ\text{C}$  for 0.5 h. The reaction mixture was quenched with water (2 mL), extracted with DCM ( $3 \times 10$  mL) and organic phase was combined and washed with brine, dried over  $\text{Na}_2\text{SO}_4$ , concentrated under reduced pressure. The crude product was purified with column chromatography on silica gel (200~300 mesh) and PE/EA (8/1, v/v) as eluent to afford 61.0 mg of the title compound as a colorless oil (64% yield).

$R_f = 0.33$  (PE/EA = 4/1, v/v). NMR Spectroscopy:  $^1\text{H}$  NMR (400 MHz,  $\text{CDCl}_3$ )  $\delta$  6.85–6.77 (m, 3H), 6.35 (s, 1H), 5.96 (s, 2H), 5.81 (s, 1H), 5.11 (s, 2H), 4.15–4.07 (m, 1H), 3.10 (s, 1H), 2.78–2.56 (m, 2H);  $^{13}\text{C}$  NMR (100 MHz,  $\text{CDCl}_3$ )  $\delta$  167.7, 148.0, 147.8, 135.0, 130.2, 129.2, 124.9 (q,  $J = 280.0$  Hz), 122.5, 109.1, 108.4, 101.4, 69.9 (q,  $J = 31.1$  Hz), 67.4, 33.5;  $^{19}\text{F}$  NMR (375 MHz,  $\text{CDCl}_3$ )  $\delta$  -79.6 (d,  $J = 6.0$  Hz, 3F). IR (ATR): 3422, 2900, 1707, 1633, 1491, 1446, 1327, 1252, 1167, 1122, 1036, 712  $\text{cm}^{-1}$ . HRMS (ESI,  $m/z$ ): calcd for  $\text{C}_{14}\text{H}_{13}\text{F}_3\text{NaO}_5^+$  ( $M+\text{Na}$ ) $^+$ : 341.0607; Found: 341.0594.

**2-Iodobenzyl 5,5,5-trifluoro-4-hydroxy-2-methylenepentanoate (9u)**

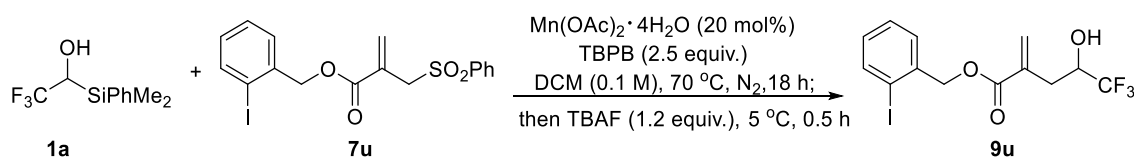

Under  $\text{N}_2$  atmosphere, to a dried 10 mL Schlenk tube equipped with a magnetic stir bar containing  $\text{Mn}(\text{OAc})_2 \cdot 4\text{H}_2\text{O}$  (14.7 mg, 0.06 mmol, 20 mol%), **7u** (406.8 mg, 0.9 mmol, 3.0 equiv.) was added DCM (3 mL, 0.1 M), **1a** (70.2 mg, 0.3 mmol) and TBPB (145.7 mg, 0.75 mmol, 2.5 equiv.) sequentially. The tube was sealed, and the resulting mixture was kept stirring at  $70^\circ\text{C}$  in heating block for 18 h. After which the mixture was cooled to  $5^\circ\text{C}$  with ice bath, TBAF (1.0 M in THF, 0.36 mL, 0.36 mmol, 1.2 equiv.) was added and the mixture was stirred at  $5^\circ\text{C}$  for 0.5 h. The reaction mixture was quenched with water (2 mL), extracted with DCM ( $3 \times 10$  mL) and organic phase was combined and washed with brine, dried over  $\text{Na}_2\text{SO}_4$ , concentrated under reduced pressure. The crude product was purified with column chromatography on silica gel (200~300 mesh) and PE/EA (12/1, v/v) as eluent to afford 83.0 mg of the title compound as a colorless oil (68 % yield).

$R_f = 0.31$  (PE/EA = 8/1 v/v). NMR Spectroscopy:  $^1\text{H}$  NMR (400 MHz,  $\text{CDCl}_3$ )  $\delta$  7.87 (d,  $J = 7.6$  Hz, 1H), 7.39–7.34 (m, 2n), 7.06–7.02 (m, 1H), 6.44 (s, 1H), 5.85 (s, 1H), 5.24 (s, 2H), 4.18–4.12 (m, 1H), 3.22 (s, 1H), 2.82–2.59 (m, 2H);  $^{13}\text{C}$  NMR (100 MHz,  $\text{CDCl}_3$ )  $\delta$  167.4, 139.8, 137.9, 134.7, 130.7, 130.3, 130.0, 128.6, 124.9 (q,  $J = 280.7$  Hz), 98.7, 71.0, 69.9 (q,  $J = 69.9$  Hz), 33.5;  $^{19}\text{F}$  NMR (375 MHz,  $\text{CDCl}_3$ )  $\delta$  -79.5 (d,  $J = 6.0$  Hz, 3F). IR (ATR): 3291, 2919, 2848, 1707, 1633, 1439, 1327, 1275, 1167, 1122, 1036, 712  $\text{cm}^{-1}$ . HRMS (ESI,  $m/z$ ): calcd for  $\text{C}_{13}\text{H}_{12}\text{F}_3\text{INaO}_3^+$  ( $M+\text{Na}$ ) $^+$ : 422.9675; Found: 422.9664.



**(4-Bromophenyl)methyl 5,5,5-trifluoro-4-hydroxy-2-methylenepentanoate (9v)**

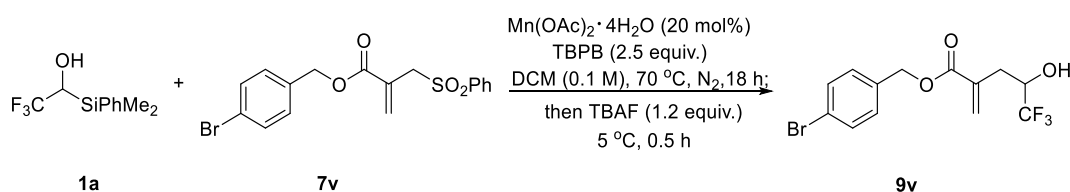

Under  $\text{N}_2$  atmosphere, to a dried 10 mL Schlenk tube equipped with a magnetic stir bar containing with  $\text{Mn}(\text{OAc})_2 \cdot 4\text{H}_2\text{O}$  (14.7 mg, 0.06 mmol, 20 mol%), **7v** (355.5 mg, 0.9 mmol, 3.0 equiv.) was added DCM (3 mL, 0.1 M), **1a** (70.2 mg, 0.3 mmol) and TBPB (145.7 mg, 0.75 mmol, 2.5 equiv.) sequentially. The tube was sealed, and the resulting mixture was kept stirring at 70 °C in heating block for 18 h. After which the mixture was cooled to 5 °C with ice bath, TBAF (1.0 M in THF, 0.36 mL, 0.36 mmol, 1.2 equiv.) was added and the mixture was stirred at 5 °C for 0.5 h. The reaction mixture was quenched with water (2 mL), extracted with DCM (3×10 mL) and organic phase was combined and washed with brine, dried over  $\text{Na}_2\text{SO}_4$ , concentrated under reduced pressure. The crude product was purified with column chromatography on silica gel (200~300 mesh) and PE/EA (8/1, v/v) as eluent to afford 60.0 mg of the title compound as a colorless oil (56% yield).

$R_f = 0.23$  (PE/EA = 4/1, v/v). NMR Spectroscopy:  $^1\text{H}$  NMR (400 MHz,  $\text{CDCl}_3$ )  $\delta$  7.51 (d,  $J = 8.3$  Hz, 2H), 7.25 (d,  $J = 8.4$  Hz, 2H), 6.39 (s, 1H), 5.85 (s, 1H), 5.17 (s, 2H), 4.17–4.09 (m, 1H), 2.81–2.59 (m, 3H);  $^{13}\text{C}$  NMR (100 MHz,  $\text{CDCl}_3$ )  $\delta$  167.6, 134.8, 134.5, 132.0, 130.4, 130.1, 124.9 (q,  $J = 279.8$  Hz), 122.7, 69.9 (q,  $J = 31.1$  Hz), 66.6, 33.4;  $^{19}\text{F}$  NMR (375 MHz,  $\text{CDCl}_3$ )  $\delta$  -79.6 (d,  $J = 6.0$  Hz, 3F). IR (ATR): 3422, 3528, 2498, 1715, 1633, 1439, 1331, 1275, 1170, 1126, 1014, 712  $\text{cm}^{-1}$ . HRMS (ESI, m/z): calcd for  $\text{C}_{13}\text{H}_{12}\text{BrF}_3\text{NaO}_3^+$  (M+Na) $^+$ : 374.9814; Found: 374.9807.

**Naphthalen-1-ylmethyl 5,5,5-trifluoro-4-hydroxy-2-methylenepentanoate (9w)**

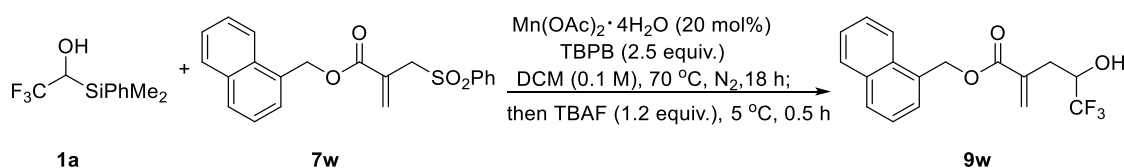

Under  $\text{N}_2$  atmosphere, to a dried 10 mL Schlenk tube equipped with a magnetic stir bar containing  $\text{Mn}(\text{OAc})_2 \cdot 4\text{H}_2\text{O}$  (14.7 mg, 0.06 mmol, 20 mol%), **7w** (329.8 mg, 0.9 mmol, 3.0 equiv.) was added DCM (3 mL, 0.1 M), **1a** (70.2 mg, 0.3 mmol) and TBPB (145.7 mg, 0.75 mmol, 2.5 equiv.) sequentially. The tube was then sealed, and the resulting mixture was stirred at 70 °C in a heating block for 14 h, after which the mixture was cooled to 5 °C with ice bath. TBAF (1.0 M in THF, 0.36 mL, 0.36 mmol, 1.2 equiv.) was added and the mixture was stirred at 5 °C for 0.5 h. The reaction mixture was quenched with water (2 mL) and extracted with DCM (3×10 mL). The organic phase was combined and washed with brine, dried over  $\text{Na}_2\text{SO}_4$ , concentrated under reduced pressure. The crude product was purified with column chromatography on silica gel (200~300 mesh) and PE/EA (20/1~10/1, v/v) as eluent to afford 70.0 mg of the title compound as a colorless oil (72% yield).

$R_f = 0.3$  (PE/EA = 10/1, v/v).  $^1\text{H}$  NMR (400 MHz,  $\text{CDCl}_3$ )  $\delta$  8.03 (d,  $J = 7.9$  Hz, 1H), 7.89 (t,  $J = 8.9$  Hz, 2H), 7.60–7.52 (m, 3H), 7.47 (t,  $J = 7.5$  Hz, 1H), 6.35 (s, 1H), 5.80 (s, 1H), 5.70 (s, 2H), 4.17–4.09 (m, 1H), 3.31 (s, 1H), 2.81–2.59 (m, 2H);  $^{13}\text{C}$  NMR (100 MHz,  $\text{CDCl}_3$ )  $\delta$  167.8, 134.9, 133.9, 131.8, 131.0, 130.5, 129.7, 128.95, 127.87, 126.86, 126.19, 125.40, 124.9 (q,  $J = 280.8$  Hz), 123.5, 69.9 (q,  $J = 30.7$  Hz), 65.8, 33.5;  $^{19}\text{F}$  NMR (375 MHz,  $\text{CDCl}_3$ )  $\delta$  -79.6 (d,  $J = 6.0$  Hz, 3F). IR (ATR): 3444, 3049, 2937, 1707, 1633, 1413, 1320, 1271, 1167, 1126, 1029, 775  $\text{cm}^{-1}$ . HRMS (ESI, m/z): calcd for  $\text{C}_{17}\text{H}_{15}\text{F}_3\text{NaO}_3^+$  (M+Na) $^+$ : 347.0866; Found: 347.0875.

### 3-(Cyclohexyl)propenyl 5,5,5-trifluoro-4-hydroxy-2-methylenepentanoate (9x)

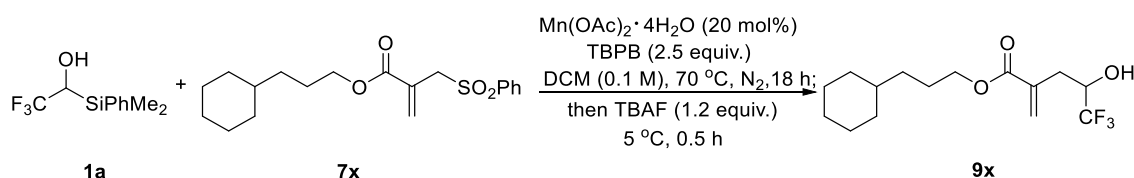

Under  $\text{N}_2$  atmosphere, to a dried 10 mL Schlenk tube equipped with a magnetic stir bar containing  $\text{Mn}(\text{OAc})_2 \cdot 4\text{H}_2\text{O}$  (14.7 mg, 0.06 mmol, 20 mol%), **7x** (210.0 mg, 0.6 mmol, 2.0 equiv.) was added DCM (3 mL, 0.1 M), **1a** (70.2 mg, 0.3 mmol) and TBPB (145.7 mg, 0.75 mmol, 2.5 equiv.) sequentially. The tube was sealed, and the resulting mixture was kept stirring at  $70^\circ\text{C}$  in heating block for 18 h. After which the mixture was cooled to  $5^\circ\text{C}$  with ice bath, TBAF (1.0 M in THF, 0.36 mL, 0.36 mmol, 1.2 equiv.) was added and the mixture was stirred at  $5^\circ\text{C}$  for 0.5 h. The reaction mixture was quenched with water (2 mL), extracted with DCM ( $3 \times 10$  mL) and organic phase was combined and washed with brine, dried over  $\text{Na}_2\text{SO}_4$ , concentrated under reduced pressure. The crude product was purified with column chromatography on silica gel (200~300 mesh) and PE/EA (15/1, v/v) as eluent to afford 61.0 mg of the title compound as a colorless oil (66% yield).

$R_f = 0.54$  (PE/EA = 4/1, v/v). NMR Spectroscopy:  $^1\text{H}$  NMR (400 MHz,  $\text{CDCl}_3$ )  $\delta$  6.34 (s, 1H), 5.80 (s, 1H), 4.18–4.08 (m, 3H), 2.79–2.58 (m, 3H), 1.71–1.64 (m, 7H), 1.26–1.12 (m, 6H), 0.92–0.87 (m, 2H);  $^{13}\text{C}$  NMR (100 MHz,  $\text{CDCl}_3$ )  $\delta$  168.2, 135.3, 129.8, 124.9 (q,  $J = 280.5$  Hz), 70.1 (q,  $J = 31.1$  Hz), 66.3, 37.4, 33.7, 33.6, 33.4, 26.7, 26.4, 26.0;  $^{19}\text{F}$  NMR (375 MHz,  $\text{CDCl}_3$ )  $\delta$  -79.6 (d,  $J = 6.0$  Hz, 3F). IR (ATR): 3422, 2922, 2851, 1711, 1633, 1413, 1320, 1275, 1174, 1129, 1033, 712  $\text{cm}^{-1}$ . HRMS (ESI,  $m/z$ ): calcd for  $\text{C}_{15}\text{H}_{24}\text{F}_3\text{O}_3^+$  ( $\text{M}+\text{H}$ ) $^+$ : 309.1672; Found: 309.1665.

### Adamantan-2-yl 5,5,5-trifluoro-4-hydroxy-2-methylenepentanoate (9y)

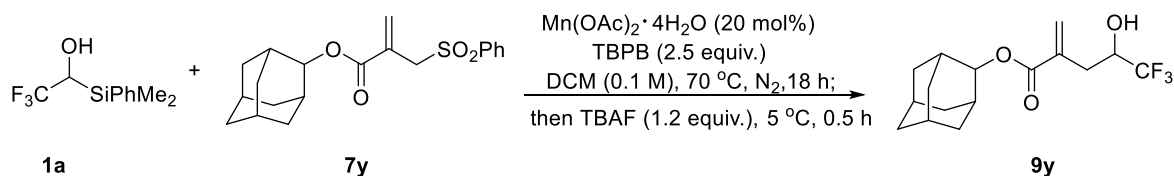

Under  $\text{N}_2$  atmosphere, to a dried 10 mL Schlenk tube equipped with a magnetic stir bar containing  $\text{Mn}(\text{OAc})_2 \cdot 4\text{H}_2\text{O}$  (14.7 mg, 0.06 mmol, 20 mol%), **7y** (216.0 mg, 0.6 mmol, 2.0 equiv.) was added DCM (3 mL, 0.1 M), **1a** (70.2 mg, 0.3 mmol) and TBPB (145.7 mg, 0.75 mmol, 2.5 equiv.) sequentially. The tube was sealed, and the resulting mixture was kept stirring at  $70^\circ\text{C}$  in heating block for 18 h. After which the mixture was cooled to  $5^\circ\text{C}$  with ice bath, TBAF (1.0 M in THF, 0.36 mL, 0.36 mmol, 1.2 equiv.) was added and the mixture was stirred at  $5^\circ\text{C}$  for 0.5 h. The reaction mixture was quenched with water (2 mL), extracted with DCM ( $3 \times 10$  mL) and organic phase was combined and washed with brine, dried over  $\text{Na}_2\text{SO}_4$ , concentrated under reduced pressure. The crude product was purified with column chromatography on silica gel (200~300 mesh) and PE/EA (20/1, v/v) as eluent to afford 78.0 mg of the title compound as a colorless oil (82 % yield).

$R_f = 0.43$  (PE/EA = 8/1, v/v). NMR Spectroscopy:  $^1\text{H}$  NMR (400 MHz,  $\text{CDCl}_3$ )  $\delta$  6.40 (s, 1H), 5.81 (s, 1H), 5.03 (s, 1H), 4.15–4.12 (m, 1H), 3.66 (s, 1H), 2.81–2.60 (m, 2H), 2.06–2.00 (m, 4H), 1.90–1.76 (m, 8H), 1.63–1.60 (m, 2H);  $^{13}\text{C}$  NMR (100 MHz,  $\text{CDCl}_3$ )  $\delta$  167.5, 135.9, 129.5, 125.0 (q,  $J = 280.8$  Hz), 78.7, 70.2 (q,  $J = 30.7$  Hz), 37.4, 36.4, 33.6, 32.1, 32.0, 27.3, 27.1;  $^{19}\text{F}$  NMR (375 MHz,  $\text{CDCl}_3$ )  $\delta$  -79.5 (d,  $J = 6.0$  Hz, 3F). IR (ATR): 3444, 2907, 2855, 1696, 1633, 1413, 1316, 1275, 1174, 1129, 1044, 712  $\text{cm}^{-1}$ . HRMS (ESI,  $m/z$ ): calcd for  $\text{C}_{16}\text{H}_{21}\text{F}_3\text{NaO}_3^+$  ( $\text{M}+\text{Na}$ ) $^+$ : 341.1335; Found: 341.1330.

### *N,N*-diphenyl 5,5,5-trifluoro-4-hydroxy-2-methylenepentanamide (9z)

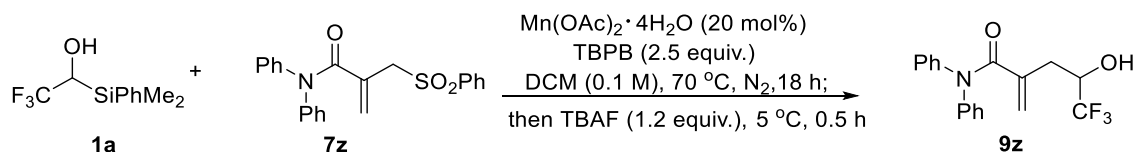

Under N<sub>2</sub> atmosphere, to a dried 10 mL Schlenk tube equipped with a magnetic stir bar containing Mn(OAc)<sub>2</sub>•4H<sub>2</sub>O (14.7 mg, 0.06 mmol, 20 mol%), **7z** (339.3 mg, 0.9 mmol, 3.0 equiv.) was added DCM (3 mL, 0.1 M), **1a** (70.2 mg, 0.3 mmol) and TBPB (145.7 mg, 0.75 mmol, 2.5 equiv.) sequentially. The tube was sealed, and the resulting mixture was kept stirring at 70 °C in heating block for 18 h. After which the mixture was cooled to 5 °C with ice bath, TBAF (1.0 M in THF, 0.36 mL, 0.36 mmol, 1.2 equiv.) was added and the mixture was stirred at 5 °C for 0.5 h. The reaction mixture was quenched with water (2 mL), extracted with DCM (3×10 mL) and organic phase was combined and washed with brine, dried over Na<sub>2</sub>SO<sub>4</sub>, concentrated under reduced pressure. The crude product was purified with column chromatography on silica gel (200~300 mesh) and PE/EA (8/1, v/v) as eluent to afford 54.0 mg of the title compound as a colorless oil (54% yield).

R<sub>f</sub> = 0.27 (PE/EA = 4/1, v/v). NMR Spectroscopy: <sup>1</sup>H NMR (400 MHz, CDCl<sub>3</sub>) δ 7.37 (t, *J* = 7.8 Hz, 4H), 7.29–7.25 (m, 2H), 7.19–7.17 (m, 4H), 5.45 (s, 1H), 5.32 (s, 1H), 4.15–4.07 (m, 1H), 2.64–2.50 (m, 2H); <sup>13</sup>C NMR (100 MHz, CDCl<sub>3</sub>) δ 172.4, 143.2, 138.6, 129.5, 127.3, 127.2, 125.8, 125.0 (q, *J* = 280.3 Hz), 71.1 (q, *J* = 30.7 Hz), 34.8; <sup>19</sup>F NMR (375 MHz, CDCl<sub>3</sub>) δ -79.5 (d, *J* = 6.0 Hz, 3F). IR (ATR): 3288, 2963, 2930, 1644, 1592, 1491, 1364, 1275, 1163, 1126, 1029, 693 cm<sup>-1</sup>. HRMS (ESI, m/z): calcd for C<sub>18</sub>H<sub>17</sub>F<sub>3</sub>NO<sub>2</sub><sup>+</sup> (M+H)<sup>+</sup>: 336.1206; Found: 336.1197.

### 5,5,5-Trifluoro-4-hydroxy-N,N-dimethyl-2-methylenepentanamide (**9aa**)

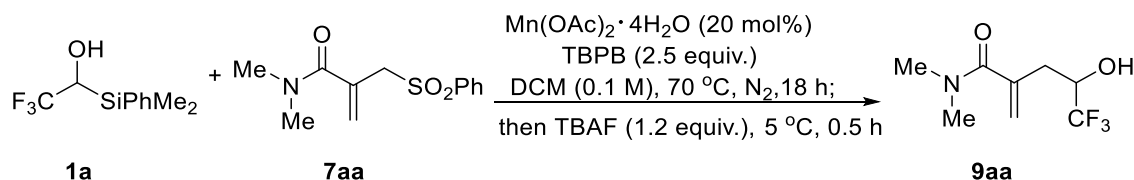

Under N<sub>2</sub> atmosphere, to a dried 10 mL Schlenk tube equipped with a magnetic stir bar containing Mn(OAc)<sub>2</sub>•4H<sub>2</sub>O (14.7 mg, 0.06 mmol, 20 mol%), **7aa** (227.9 mg, 0.9 mmol, 3.0 equiv.) was added DCM (3 mL, 0.1 M), **1a** (70.2 mg, 0.3 mmol) and TBPB (145.7 mg, 0.75 mmol, 2.5 equiv.) sequentially. The tube was then sealed, and the resulting mixture was stirred at 70 °C in a heating block for 14 h, after which the mixture was cooled to 5 °C with ice bath. TBAF (1.0 M in THF, 0.36 mL, 0.36 mmol, 1.2 equiv.) was added and the mixture was stirred at 5 °C for 0.5 h. The reaction mixture was quenched with water (2 mL) and extracted with DCM (3×10 mL). The organic phase was combined and washed with brine, dried over Na<sub>2</sub>SO<sub>4</sub>, concentrated under reduced pressure. The crude product was purified with column chromatography on silica gel (200~300 mesh) and PE/EA (20/1~10/1, v/v) as eluent to afford 40.0 mg of the title compound as a colorless oil (63% yield).

R<sub>f</sub> = 0.30 (PE/EA = 2/1, v/v). <sup>1</sup>H NMR (400 MHz, CDCl<sub>3</sub>) δ 5.58 (s, 1H), 5.37 (s, 1H), 4.10–4.02 (m, 1H), 3.14 (s, 3H), 3.03 (s, 3H), 2.64–2.41 (m, 2H); <sup>13</sup>C NMR (100 MHz, CDCl<sub>3</sub>) δ 172.4, 137.6, 125.1 (q, *J* = 280.3 Hz), 121.8, 71.1 (q, *J* = 30.7 Hz), 39.8, 35.5, 34.8; <sup>19</sup>F NMR (375 MHz, CDCl<sub>3</sub>) δ -79.4 (d, *J* = 6.0 Hz, 3F). IR (ATR): 3329, 2930, 1610, 1454, 1264, 1167, 1118, 1029, 734 cm<sup>-1</sup>. HRMS (ESI, m/z): calcd for C<sub>8</sub>H<sub>12</sub>F<sub>3</sub>NNaO<sub>2</sub><sup>+</sup> (M+Na)<sup>+</sup>: 234.0712; Found: 234.0707.

### 1,1,1-Trifluoro-4-tosylpent-4-en-2-ol (**9ab**)

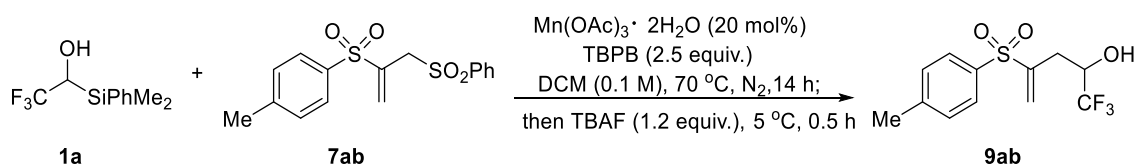

Under N<sub>2</sub> atmosphere, to a dried 10 mL Schlenk tube equipped with a magnetic stir bar containing Mn(OAc)<sub>3</sub>•2H<sub>2</sub>O (16.1 mg, 0.06 mmol, 20 mol%), **7ab** (302.7 mg, 0.9 mmol, 3.0 equiv.) was added DCM (3 mL, 0.1 M), **1a** (70.2 mg, 0.3 mmol) and TBPB (145.7 mg, 0.75 mmol, 2.5 equiv.) sequentially. The tube was then sealed, and the resulting mixture was stirred at 70 °C in a heating block for 14 h, after which the mixture was cooled to 5 °C with ice bath. TBAF (1.0 M in THF, 0.36 mL, 0.36 mmol, 1.2 equiv.) was added and the mixture was stirred at 5 °C for 0.5 h. The reaction mixture was quenched with water (2 mL) and extracted with DCM (3×10 mL). The organic phase was combined and washed with brine, dried over Na<sub>2</sub>SO<sub>4</sub>, concentrated under reduced pressure. The crude product was purified with column

chromatography on silica gel (200~300 mesh) and PE/EA (20/1~10/1, v/v) as eluent to afford 63.5 mg of the title compound as a colorless oil (72% yield).

$R_f = 0.30$  (PE/EA = 5/1, v/v).  $^1\text{H NMR}$  (400 MHz,  $\text{CDCl}_3$ )  $\delta$  7.76 (d,  $J = 8.4$  Hz, 2H), 7.37 (d,  $J = 8.0$  Hz, 2H), 6.47 (s, 1H), 5.96 (s, 1H), 4.30–4.22 (m, 1H), 2.63–2.46 (m, 5H);  $^{13}\text{C NMR}$  (100 MHz,  $\text{CDCl}_3$ )  $\delta$  145.5, 145.0, 134.7, 130.3, 128.6, 128.3, 124.6 (q,  $J = 277.9$  Hz), 69.1 (q,  $J = 31.4$  Hz), 31.2, 21.8;  $^{19}\text{F NMR}$  (375 MHz,  $\text{CDCl}_3$ )  $\delta$  -79.7 (d,  $J = 6.0$  Hz, 3F). IR (ATR): 3474, 2930, 2855, 1595, 1431, 1279, 1137, 1081, 734  $\text{cm}^{-1}$ . HRMS (ESI,  $m/z$ ): calcd for  $\text{C}_{12}\text{H}_{13}\text{F}_3\text{NaO}_3\text{S}^+$  ( $\text{M}+\text{Na}$ ) $^+$ : 317.0430; Found: 317.0432.

#### 1,1,1-Trifluoro-4-phenylpent-4-en-2-ol (9ac)

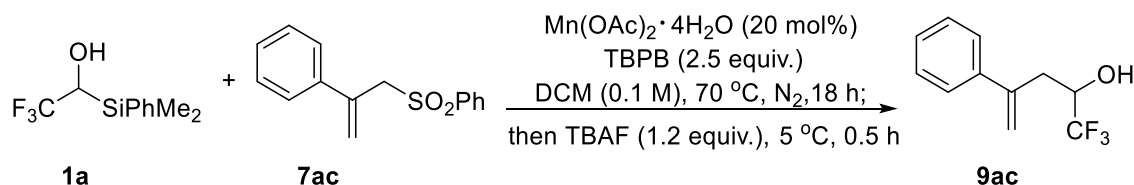

Under  $\text{N}_2$  atmosphere, to a dried 25 mL Schlenk tube equipped with a magnetic stir bar containing  $\text{Mn}(\text{OAc})_2 \cdot 4\text{H}_2\text{O}$  (29.4 mg, 0.12 mmol, 20 mol%) and **7ac** (465.0 mg, 1.8 mmol, 3.0 equiv.) was added DCM (6 mL, 0.1 M), **1a** (140.4 mg, 0.6 mmol), and TBPB (291.3 mg, 1.5 mmol, 2.5 equiv.) sequentially. The tube was then sealed, and the resulting mixture was stirred at 70 °C in a heating block for 18 h, after which the mixture was cooled to 5 °C with ice bath. TBAF (1.0 M in THF, 0.72 mL, 0.72 mmol, 1.2 equiv.) was added and the mixture was stirred at 5 °C for 0.5 h. The reaction mixture was quenched with water (10 mL) and extracted with DCM (3×10 mL). The organic phase was combined and washed with brine, dried over  $\text{Na}_2\text{SO}_4$ , concentrated under reduced pressure. The crude product was purified with column chromatography on silica gel (200~300 mesh) and PE/EA (30/1~20/1, v/v) as eluent to afford 56.0 mg of the title compound as a colorless oil (43% yield).

$R_f = 0.47$  (PE/EA = 8/1, v/v). NMR Spectroscopy:  $^1\text{H NMR}$  (400 MHz,  $\text{CDCl}_3$ )  $\delta$  7.42–7.31 (m, 5H), 5.49 (s, 1H), 5.28 (s, 1H), 4.00 (bs, 1H), 3.11–2.67 (m, 2H), 2.21 (s, 1H);  $^{13}\text{C NMR}$  (100 MHz,  $\text{CDCl}_3$ )  $\delta$  142.7, 139.4, 128.8, 128.3, 126.3, 125.2 (q,  $J = 279.8$  Hz), 121.1, 117.0, 68.7 (q,  $J = 30.9$  Hz), 36.3;  $^{19}\text{F NMR}$  (375 MHz,  $\text{CDCl}_3$ )  $\delta$  -79.5 (d,  $J = 6.0$  Hz, 3F). IR (ATR): 3422, 3086, 3030, 2960, 2930, 1633, 1446, 1390, 1029, 701  $\text{cm}^{-1}$ . HRMS (ESI,  $m/z$ ): calcd for  $\text{C}_{11}\text{H}_{12}\text{F}_3\text{O}^+$  ( $\text{M}+\text{H}$ ) $^+$ : 217.0835; Found: 217.0828.

#### 1,1,1-Trifluoro-5-methyl-5-phenylhex-4-en-2-ol (9ad)

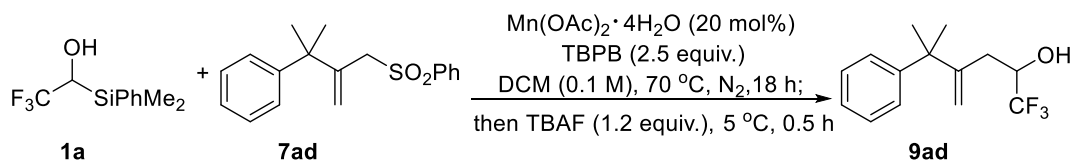

Under  $\text{N}_2$  atmosphere, to a dried 25 mL Schlenk tube equipped with a magnetic stir bar containing  $\text{Mn}(\text{OAc})_2 \cdot 4\text{H}_2\text{O}$  (29.4 mg, 0.12 mmol, 20 mol%) and **7ad** (540.0 mg, 1.8 mmol, 3.0 equiv.) was added DCM (6 mL, 0.1 M), **1a** (140.4 mg, 0.6 mmol), and TBPB (291.3 mg, 1.5 mmol, 2.5 equiv.) sequentially. The tube was then sealed, and the resulting mixture was stirred at 70 °C in a heating block for 14 h, after which the mixture was cooled to 5 °C with ice bath. TBAF (1.0 M in THF, 0.72 mL, 0.72 mmol, 1.2 equiv.) was added and the mixture was stirred at 5 °C for 0.5 h. The reaction mixture was quenched with water (10 mL) and extracted with DCM (3×10 mL). The organic phase was combined and washed with brine, dried over  $\text{Na}_2\text{SO}_4$ , concentrated under reduced pressure. The crude product was purified with column chromatography on silica gel (200~300 mesh) and PE/EA (30/1~20/1, v/v) as eluent to afford 62.0 mg of the title compound as a colorless oil (40% yield).

$R_f = 0.42$  (PE/EA = 8/1, v/v). NMR Spectroscopy:  $^1\text{H NMR}$  (400 MHz,  $\text{CDCl}_3$ )  $\delta$  7.32–7.31 (m, 4H), 7.24–7.19 (m, 1H), 5.37 (s, 1H), 5.15 (s, 1H), 3.81–3.73 (m, 1H), 2.28–2.00 (m, 2H), 1.79 (s, 1H), 1.48–1.47 (m, 6H);  $^{13}\text{C NMR}$  (100 MHz,  $\text{CDCl}_3$ )  $\delta$  150.8, 146.9, 128.6, 126.5, 126.2, 125.0 (q,  $J = 280.3$  Hz), 111.5, 69.4 (q,  $J = 30.7$  Hz), 44.4, 32.9, 28.3;  $^{19}\text{F NMR}$  (375 MHz,  $\text{CDCl}_3$ )  $\delta$  -80.0 (d,  $J = 6.0$  Hz, 3F). IR (ATR): 3444, 2974, 2878, 1640, 1446, 1383, 1275, 1167, 1126, 1029, 701  $\text{cm}^{-1}$ . HRMS (ESI,  $m/z$ ): calcd for  $\text{C}_{14}\text{H}_{17}\text{F}_3\text{NaO}^+$  ( $\text{M}+\text{Na}$ ) $^+$ : 281.1124; Found: 281.1121.

### Cyclobutyl 5,5,5-trifluoro-4-hydroxy-2-methylenepentanoate (**9ae**)

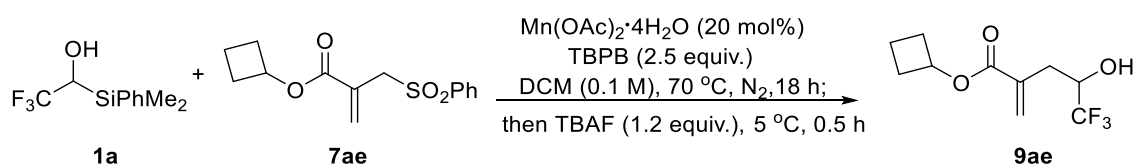

Under  $\text{N}_2$  atmosphere, to a dried 10 mL Schlenk tube equipped with a magnetic stir bar containing  $\text{Mn}(\text{OAc})_2 \cdot 4\text{H}_2\text{O}$  (14.7 mg, 0.06 mmol, 20 mol%), **4ae** (252.0 mg, 0.9 mmol, 3.0 equiv.) was added DCM (3 mL, 0.1 M), **3a** (70.2 mg, 0.3 mmol) and TBPB (145.7 mg, 0.75 mmol, 2.5 equiv.) sequentially. The tube was sealed, and the resulting mixture was kept stirring at 70 °C in heating block for 18 h. After which the mixture was cooled to 5 °C with ice bath, TBAF (1.0 M in THF, 0.36 mL, 0.36 mmol, 1.2 equiv.) was added and the mixture was stirred at 5 °C for 0.5 h. The reaction mixture was quenched with water (2 mL), extracted with DCM (3×10 mL) and organic phase was combined and washed with brine, dried over  $\text{Na}_2\text{SO}_4$ , concentrated under reduced pressure. The crude product was purified with column chromatography on silica gel (200–300 mesh) and PE/EA (15/1~ 8/1, v/v) as eluent to afford 50.0 mg of the title compound as a colorless oil (70% yield).

$R_f = 0.36$  (PE/EA = 8/1, v/v). NMR Spectroscopy:  $^1\text{H}$  NMR (400 MHz,  $\text{CDCl}_3$ )  $\delta$  6.35 (s, 1H), 5.80 (s, 1H), 5.09–5.02 (m, 1H), 4.15–4.07 (m, 1H), 2.77–2.56 (m, 2H), 2.42–2.35 (m, 2H), 2.18–2.07 (m, 2H), 1.87–1.60 (m, 2H);  $^{13}\text{C}$  NMR (100 MHz,  $\text{CDCl}_3$ )  $\delta$  167.5, 135.4, 129.8, 124.9 (q,  $J = 283.4$  Hz), 70.1 (q,  $J = 30.9$  Hz), 70.1, 33.48, 30.34, 13.6;  $^{19}\text{F}$  NMR (375 MHz,  $\text{CDCl}_3$ )  $\delta$  -79.6 (bs, 3F). IR (ATR): 3444, 2993, 2952, 1700, 1633, 1435, 1320, 1275, 1163, 1126, 1029, 712  $\text{cm}^{-1}$ . HRMS (ESI, m/z): calcd for  $\text{C}_{10}\text{H}_{14}\text{F}_3\text{O}_3^+$  ( $\text{M}+\text{H}$ ) $^+$ : 239.0890; Found: 239.0881.

### 6-Hydroxyhexyl 5,5,5-trifluoro-4-hydroxy-2-methylenepentanoate (**9af**)

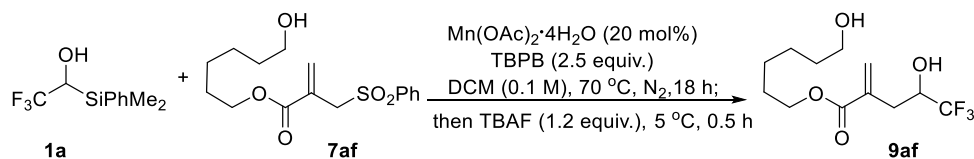

Under  $\text{N}_2$  atmosphere, to a dried 10 mL Schlenk tube equipped with a magnetic stir bar containing  $\text{Mn}(\text{OAc})_2 \cdot 4\text{H}_2\text{O}$  (14.7 mg, 0.06 mmol, 20 mol%), **7af** (302.4 mg, 0.9 mmol, 3.0 equiv.) was added DCM (3 mL, 0.1 M), **1a** (70.2 mg, 0.3 mmol) and TBPB (145.7 mg, 0.75 mmol, 2.5 equiv.) sequentially. The tube was sealed, and the resulting mixture was kept stirring at 70 °C in heating block for 18 h. After which the mixture was cooled to 5 °C with ice bath, TBAF (1.0 M in THF, 0.36 mL, 0.36 mmol, 1.2 equiv.) was added and the mixture was stirred at 5 °C for 0.5 h. The reaction mixture was quenched with water (2 mL), extracted with DCM (3×10 mL) and organic phase was combined and washed with brine, dried over  $\text{Na}_2\text{SO}_4$ , concentrated under reduced pressure. The crude product was purified with column chromatography on silica gel (200–300 mesh) and PE/EA (20/1 ~2/1, v/v) as eluent to afford 40.0 mg of the title compound as a colorless oil (45 % yield).

$R_f = 0.45$  (PE/EA = 1/1, v/v). NMR Spectroscopy:  $^1\text{H}$  NMR (400 MHz,  $\text{CDCl}_3$ )  $\delta$  6.33 (s, 1H), 5.79 (s, 1H), 4.22–4.09 (m, 3H), 3.65 (t,  $J = 6.4$  Hz, 2H), 2.79–2.56 (m, 2H), 2.30 (s, 2H), 1.73–1.70 (m, 2H), 1.59–1.56 (m, 2H), 1.42–1.40 (m, 4H);  $^{13}\text{C}$  NMR (100 MHz,  $\text{CDCl}_3$ )  $\delta$  168.0, 135.2, 129.7, 125.0 (q,  $J = 280.8$  Hz), 69.8 (q,  $J = 30.9$  Hz), 65.6, 62.9, 33.5, 32.6, 28.5, 25.8, 25.4;  $^{19}\text{F}$  NMR (375 MHz,  $\text{CDCl}_3$ )  $\delta$  -79.5 (d,  $J = 6.0$  Hz, 3F). IR (ATR): 3384, 2937, 2863, 1707, 1633, 1435, 1316, 1275, 1167, 1126, 1033, 708  $\text{cm}^{-1}$ . HRMS (ESI, m/z): calcd for  $\text{C}_{12}\text{H}_{19}\text{F}_3\text{NaO}_4^+$  ( $\text{M}+\text{Na}$ ) $^+$ : 307.1128; Found: 307.1117.

### 6-Oxohexyl 5,5,5-trifluoro-4-hydroxy-2-methylenepentanoate (**9ag**)

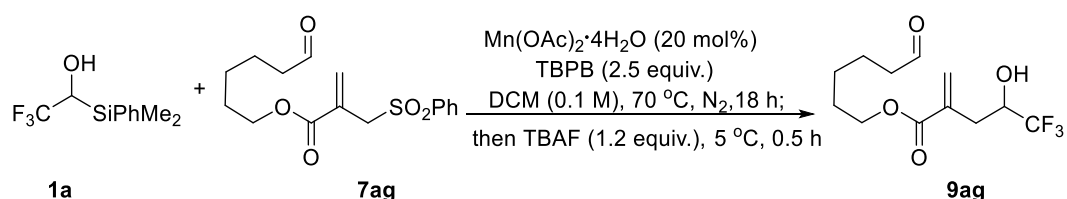

Under  $\text{N}_2$  atmosphere, to a dried 10 mL Schlenk tube equipped with a magnetic stir bar containing  $\text{Mn}(\text{OAc})_2 \cdot 4\text{H}_2\text{O}$

(14.7 mg, 0.06 mmol, 20 mol%), **7ag** (291.6 mg, 0.9 mmol, 3.0 equiv.) was added DCM (3 mL, 0.1 M), **1a** (70.2 mg, 0.3 mmol) and TBPB (145.7 mg, 0.75 mmol, 2.5 equiv.) sequentially. The tube was sealed, and the resulting mixture was kept stirring at 70 °C in heating block for 18 h. After which the mixture was cooled to 5 °C with ice bath, TBAF (1.0 M in THF, 0.36 mL, 0.36 mmol, 1.2 equiv.) was added and the mixture was stirred at 5 °C for 0.5 h. The reaction mixture was quenched with water (2 mL), extracted with DCM (3×10 mL) and organic phase was combined and washed with brine, dried over Na<sub>2</sub>SO<sub>4</sub>, concentrated under reduced pressure. The crude product was purified with column chromatography on silica gel (200~300 mesh) and PE/EA (20/1–2/1, v/v) as eluent to afford 39.0 mg of the title compound as a colorless oil (46 % yield).

R<sub>f</sub> = 0.61 (PE/EA = 2/1, v/v). NMR Spectroscopy: <sup>1</sup>H NMR (400 MHz, CDCl<sub>3</sub>) δ 9.77 (t, *J* = 1.5 Hz, 1H), 6.33 (s, 1H), 5.80 (s, 1H), 4.22–4.09 (m, 3H), 2.79–2.57 (m, 2H), 2.47 (td, *J* = 7.2, 1.3 Hz, 2H), 1.76–1.64 (m, 4H), 1.46–1.38 (m, 2H); <sup>13</sup>C NMR (100 MHz, CDCl<sub>3</sub>) δ 202.5, 167.9, 135.2, 129.8, 124.9 (q, *J* = 281.1 Hz), 69.9 (q, *J* = 30.7 Hz), 65.3, 43.8, 33.5, 28.4, 25.6, 21.7; <sup>19</sup>F NMR (375 MHz, CDCl<sub>3</sub>) δ –79.6 (d, *J* = 6.0 Hz, 3F). IR (ATR): 3425, 2930, 2859, 1711, 1275, 1167, 1126, 1029, 734 cm<sup>-1</sup>. HRMS (ESI, *m/z*): calcd for C<sub>12</sub>H<sub>17</sub>F<sub>3</sub>NaO<sub>4</sub><sup>+</sup> (M+Na)<sup>+</sup>: 305.0971; Found: 305.0970.

### 1-Cyclopropyl-5,5,5-trifluoro-4-hydroxy-2-methylenepentan-1-one (**9ah**)

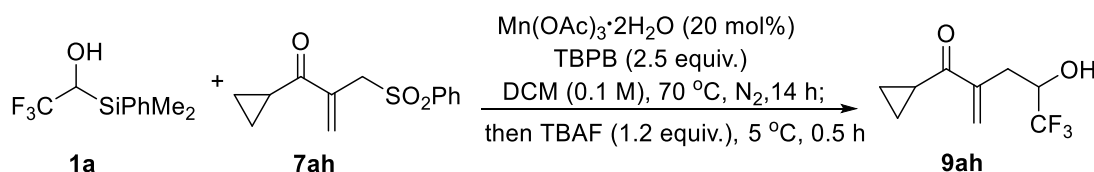

Under N<sub>2</sub> atmosphere, to a dried 10 mL Schlenk tube equipped with a magnetic stir bar containing Mn(OAc)<sub>3</sub>•2H<sub>2</sub>O (16.1 mg, 0.06 mmol, 20 mol%) was added DCM (3 mL), **1a** (70.2 mg, 0.3 mmol), **7ah** (225.0 mg, 0.9 mmol, 3.0 equiv.) and TBPB (145.7 mg, 0.75 mmol, 2.5 equiv.) sequentially. The tube was then sealed, and the resulting mixture was stirred at 70 °C in a heating block for 14 h, after which the mixture was cooled to 5 °C with ice bath. TBAF (1.0 M in THF, 0.36 mL, 0.36 mmol, 1.2 equiv.) was added and the mixture was stirred at 5 °C for 0.5 h. The reaction mixture was quenched with water (2 mL) and extracted with DCM (3×10 mL). The organic phase was combined and washed with brine, dried over Na<sub>2</sub>SO<sub>4</sub>, concentrated under reduced pressure. The crude product was purified with column chromatography on silica gel (200~300 mesh) and PE/EA (20/1~10/1, v/v) as eluent to afford 38.7 mg of the title compound as a yellow oil (62% yield).

R<sub>f</sub> = 0.50 (PE/EA = 5/1, v/v). <sup>1</sup>H NMR (400 MHz, CDCl<sub>3</sub>) δ 6.38 (s, 1H), 6.04 (s, 1H), 4.27 (s, 1H), 4.00 (s, 1H), 2.71–2.57 (m, 2H), 2.49–2.43 (m, 1H), 1.16–1.00 (m, 4H); <sup>13</sup>C NMR (100 MHz, CDCl<sub>3</sub>) δ 204.5, 144.3, 129.3, 125.0 (q, *J* = 280.8 Hz), 70.5 (q, *J* = 30.7 Hz), 33.4, 16.8, 12.7, 12.3; <sup>19</sup>F NMR (375 MHz, CDCl<sub>3</sub>) δ –79.5 (d, *J* = 6.0 Hz, 3F). IR(ATR): 3437, 3012, 2922, 2855, 1651, 1443, 1398, 1275, 1163, 1129, 1062, 746 cm<sup>-1</sup>. HRMS (ESI, *m/z*): calcd for C<sub>9</sub>H<sub>12</sub>F<sub>3</sub>O<sub>2</sub><sup>+</sup> (M+H)<sup>+</sup>: 209.0784; Found: 209.0784.

### (1*R*,2*S*,5*R*)-2-Isopropyl-5-methylcyclohexyl 5,5,5-trifluoro-4-hydroxy-2-methylenepentanoate (**9ai**)

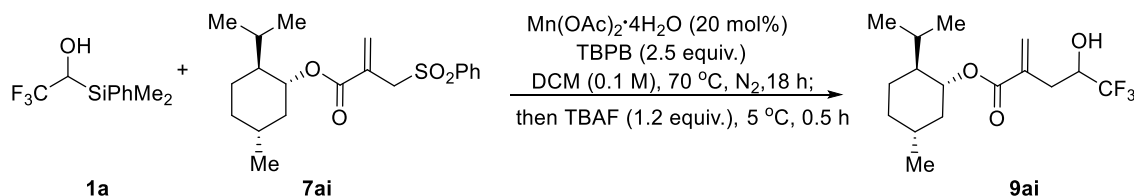

Under N<sub>2</sub> atmosphere, to a dried 10 mL Schlenk tube equipped with a magnetic stir bar containing Mn(OAc)<sub>2</sub>•4H<sub>2</sub>O (14.7 mg, 0.06 mmol, 20 mol%), **7ai** (218.4 mg, 0.6 mmol, 2.0 equiv.) was added DCM (3 mL, 0.1 M), **1a** (70.2 mg, 0.3 mmol) and TBPB (145.7 mg, 0.75 mmol, 2.5 equiv.) sequentially. The tube was sealed, and the resulting mixture was kept stirring at 70 °C in heating block for 18 h. After which the mixture was cooled to 5 °C with ice bath, TBAF (1.0 M in THF, 0.36 mL, 0.36 mmol, 1.2 equiv.) was added and the mixture was stirred at 5 °C for 0.5 h. The reaction mixture was quenched with water (2 mL), extracted with DCM (3×10 mL) and organic phase was combined and washed with brine, dried over Na<sub>2</sub>SO<sub>4</sub>, concentrated under reduced pressure. The crude product was purified with column

chromatography on silica gel (200~300 mesh) and PE/EA (15/1~ 8/1, v/v) as eluent to afford 63.0 mg of the title compound as a colorless oil (65% yield).

$R_f = 0.50$  (PE/EA = 10/1, v/v). NMR Spectroscopy:  $^1\text{H}$  NMR (400 MHz,  $\text{CDCl}_3$ )  $\delta$  6.31 (s, 1H), 5.78 (s, 1H), 4.81–4.75 (m, 1H), 4.11–4.10 (m, 1H), 3.72–3.66 (m, 1H), 2.78–2.59 (m, 2H), 2.04–2.01 (m, 1H), 1.87–1.81 (m, 1H), 1.72–1.69 (m, 2H), 1.53–1.43 (m, 2H), 1.13–0.99 (m, 2H), 0.93–0.89 (m, 7H), 0.77–0.76 (m, 3H);  $^{13}\text{C}$  NMR (100 MHz,  $\text{CDCl}_3$ )  $\delta$  167.9, 135.7, 129.4, 129.4 (C'), 124.9 (q,  $J = 272.4$  Hz), 76.0, 70.2 (q,  $J = 30.7$  Hz), 47.2, 40.8, 34.3, 33.7, 33.6 (C'), 31.6, 26.6, 23.7, 23.6 (C'), 22.1, 20.8, 20.8 (C'), 16.6, 16.5 (C');  $^{19}\text{F}$  NMR (375 MHz,  $\text{CDCl}_3$ )  $\delta$  -79.5 (d,  $J = 6.0$  Hz, 3F), -79.5 (d,  $J = 6.0$  Hz, 3F'). IR (ATR): 3444, 2960, 2870, 1707, 1633, 1457, 1316, 1275, 1178, 1129, 1036, 712  $\text{cm}^{-1}$ . HRMS (ESI, m/z): calcd for  $\text{C}_{16}\text{H}_{25}\text{F}_3\text{NaO}_3^+$  (M+Na) $^+$ : 345.1648; Found: 345.1643.

**(3S,5S,8R,9S,10S,13S,14S)-10,13-Dimethyl-17-oxoheneadecahydro-1H-cyclopenta[*a*]pennanthren-3-yl 5,5,5-trifluoro-4-hydroxy-2-methylenepentanoate (9aj)**

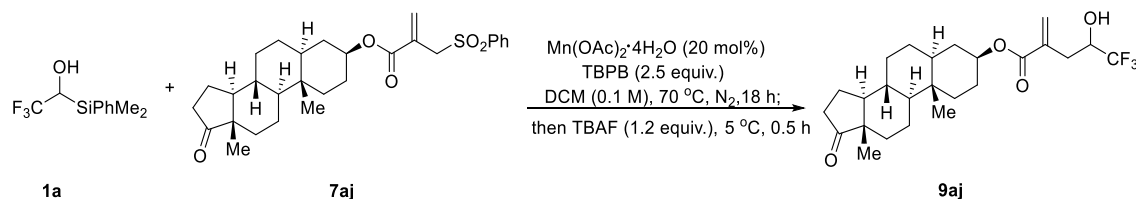

Under  $\text{N}_2$  atmosphere, to a dried 10 mL Schlenk tube equipped with a magnetic stir bar containing  $\text{Mn}(\text{OAc})_2 \cdot 4\text{H}_2\text{O}$  (14.7 mg, 0.06 mmol, 20 mol%), **7aj** (298.8 mg, 0.6 mmol, 2.0 equiv.) was added DCM (3 mL, 0.1 M), **1a** (70.2 mg, 0.3 mmol) and TBPB (145.7 mg, 0.75 mmol, 2.5 equiv.) sequentially. The tube was sealed, and the resulting mixture was kept stirring at 70 °C in heating block for 18 h. After which the mixture was cooled to 5 °C with ice bath, TBAF (1.0 M in THF, 0.36 mL, 0.36 mmol, 1.2 equiv.) was added and the mixture was stirred at 5 °C for 0.5 h. The reaction mixture was quenched with water (2 mL), extracted with DCM (3×10 mL) and organic phase was combined and washed with brine, dried over  $\text{Na}_2\text{SO}_4$ , concentrated under reduced pressure. The crude product was purified with column chromatography on silica gel (200~300 mesh) and PE/EA (5/1, v/v) as eluent to afford 81.0 mg of the title compound as a white solid (59 % yield).

$R_f = 0.24$  (PE/EA = 2/1, v/v). mp: 95 °C–97 °C. NMR Spectroscopy:  $^1\text{H}$  NMR (400 MHz,  $\text{CDCl}_3$ )  $\delta$  6.31 (s, 1H), 5.77 (s, 1H), 4.81–4.73 (m, 1H), 4.11–4.08 (m, 1H), 3.82 (s, 1H), 2.76–2.55 (m, 2H), 2.46–2.39 (m, 1H), 2.11–2.01 (m, 1H), 1.95–1.75 (m, 5H), 1.67–1.19 (m, 12H), 1.09–0.96 (m, 2H), 0.86 (s, 3H), 0.85 (s, 3H), 0.75–0.69 (m, 1H);  $^{13}\text{C}$  NMR (100 MHz,  $\text{CDCl}_3$ )  $\delta$  221.7, 167.5, 135.5, 129.5, 124.9 (q,  $J = 280.8$  Hz), 75.1, 70.0 (q,  $J = 30.9$  Hz), 54.3, 51.4, 47.9, 44.7, 36.7, 36.0, 35.7, 35.1, 33.9, 33.5, 31.6, 30.9, 28.3, 27.4, 21.9, 20.6, 13.9, 12.3;  $^{19}\text{F}$  NMR (375 MHz,  $\text{CDCl}_3$ )  $\delta$  -79.5– -79.5 (m, 3F, 3F'). IR (ATR): 3370, 2933, 2855, 1718, 1633, 1405, 1312, 1291, 1178, 1122, 1014, 716  $\text{cm}^{-1}$ . HRMS (ESI, m/z): calcd for  $\text{C}_{25}\text{H}_{35}\text{F}_3\text{NaO}_4^+$  (M+Na) $^+$ : 479.2380; Found: 479.2370.

**(3S,8S,9S,10R,13R,14S,17R)-10,13-Dimethyl-17-((R)-6-methylheptan-2-yl)-2,3,4,7,8,9,10,11,12,13,14,15,16,17-tetradecahydro-1H-cyclopenta[*a*]pennanthren-3-yl 5,5,5-trifluoro-4-hydroxy-2-methylenepentanoate (9ak)**

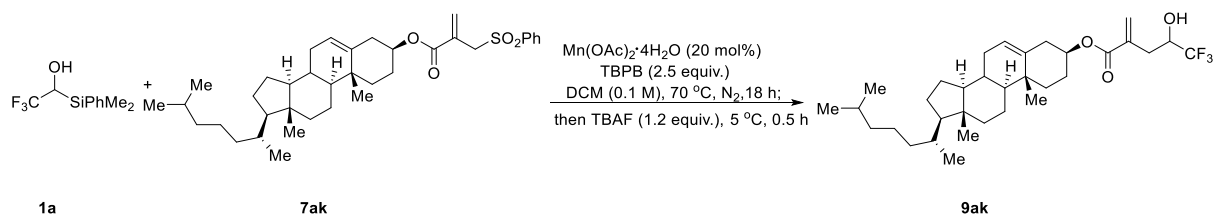

Under  $\text{N}_2$  atmosphere, to a dried 10 mL Schlenk tube equipped with a magnetic stir bar containing  $\text{Mn}(\text{OAc})_2 \cdot 4\text{H}_2\text{O}$  (14.7 mg, 0.06 mmol, 20 mol%), **4ak** (357.6 mg, 0.6 mmol, 2.0 equiv.) was added DCM (3 mL, 0.1 M), **3a** (70.2 mg, 0.3 mmol) and TBPB (145.7 mg, 0.75 mmol, 2.5 equiv.) sequentially. The tube was sealed, and the resulting mixture was kept stirring at 70 °C in heating block for 18 h. After which the mixture was cooled to 5 °C with ice bath, TBAF (1.0 M in THF, 0.36 mL, 0.36 mmol, 1.2 equiv.) was added and the mixture was stirred at 5 °C for 0.5 h. The reaction mixture was quenched with water (2 mL), extracted with DCM (3×10 mL) and organic phase was combined and washed with

brine, dried over Na<sub>2</sub>SO<sub>4</sub>, concentrated under reduced pressure. The crude product was purified with column chromatography on silica gel (200~300 mesh) and PE/EA (5/1, v/v) as eluent to afford 99.5 mg of the title compound as a white solid (60 % yield).

R<sub>f</sub> = 0.48 (PE/EA = 8/1, v/v). mp: 83 °C–85 °C. NMR Spectroscopy: <sup>1</sup>H NMR (400 MHz, CDCl<sub>3</sub>) δ 6.33 (s, 1H), 5.78 (s, 1H), 5.40 (d, *J* = 4.3 Hz, 1H), 4.73–4.65 (m, 1H), 4.12–4.09 (m, 1H), 3.75 (s, 1H), 2.77–2.57 (m, 2H), 2.37 (d, *J* = 7.6 Hz, 2H), 2.03–1.95 (m, 2H), 1.92–1.79 (m, 3H), 1.70–1.43 (m, 7H), 1.40–1.25 (m, 4H), 1.20–1.08 (m, 7H), 1.03–0.95 (m, 6H), 0.91 (d, *J* = 6.4 Hz, 3H), 0.86 (dd, *J* = 6.7, 1.8 Hz, 6H), 0.68 (s, 3H); <sup>13</sup>C NMR (100 MHz, CDCl<sub>3</sub>) δ 167.6, 139.4, 135.6, 129.6, 124.9 (q, *J* = 280.8 Hz), 123.2, 75.64, 70.1 (q, *J* = 30.7 Hz), 56.8, 56.2, 50.1, 42.4, 39.8, 39.6, 38.1, 37.0, 36.7, 36.3, 35.9, 33.6, 32.0, 31.9, 28.4, 28.1, 27.8, 24.4, 24.0, 23.0, 22.7, 21.2, 19.5, 18.8, 12.0; <sup>19</sup>F NMR (375 MHz, CDCl<sub>3</sub>) δ –79.5 (bs, 3F). IR (ATR): 3422, 2937, 2870, 1711, 1633, 1465, 1331, 1275, 1170, 1129, 1029, 734 cm<sup>-1</sup>. HRMS (ESI, m/z): calcd for C<sub>33</sub>H<sub>51</sub>F<sub>3</sub>NaO<sub>3</sub><sup>+</sup> (M+Na)<sup>+</sup>: 575.3683; Found: 575.3671.

**(8*R*,9*S*,10*R*,13*S*,14*S*,17*S*)-10,13-dimethyl-3-oxo--2,3,6,7,8,9,10,11,12,13,14,15,16,17-tetradecahydro-1*H*-cyclopenta[*a*]phenanthrene-17-yl 5,5,5-trifluoro-4-hydroxy-2-methylenepentanoate (9a)**

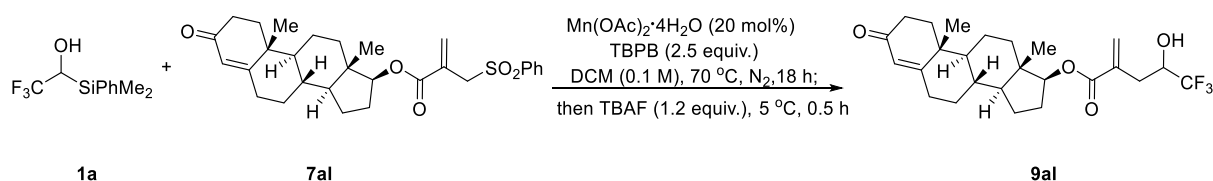

Under N<sub>2</sub> atmosphere, to a dried 10 mL Schlenk tube equipped with a magnetic stir bar containing with Mn(OAc)<sub>2</sub>•4H<sub>2</sub>O (14.7 mg, 0.06 mmol, 20 mol%), **7a** (297.6 mg, 0.6 mmol, 2.0 equiv.) was added DCM (3 mL, 0.1 M), **1a** (70.2 g, 0.3 mmol) and TBPB (145.7 mg, 0.75 mmol, 2.5 equiv.) sequentially. The tube was sealed, and the resulting mixture was kept stirring at 70 °C in heating block for 18 h. After which the mixture was cooled to 5 °C with ice bath, TBAF (1.0 M in THF, 0.36 mL, 0.36 mmol, 1.2 equiv.) was added and the mixture was stirred at 5 °C for 0.5 h. The reaction mixture was quenched with water (2 mL), extracted with DCM (3×10 mL) and organic phase was combined and washed with brine, dried over Na<sub>2</sub>SO<sub>4</sub>, concentrated under reduced pressure. The crude product was purified with column chromatography on silica gel (200~300 mesh) and PE/EA (8/1, v/v) as eluent to afford 86.0 mg of the title compound as a white solid (63% yield).

R<sub>f</sub> = 0.43 (PE/EA = 2/1, v/v). mp: 105 °C–107 °C. NMR Spectroscopy: <sup>1</sup>H NMR (400 MHz, CDCl<sub>3</sub>) δ 6.34 (s, 1H), 5.79 (s, 1H), 5.73 (s, 1H), 4.68 (t, *J* = 7.3 Hz, 1 H), 4.14–4.10 (m, 1H), 3.56 (s, 1H), 2.79–2.58 (m, 2H), 2.47–2.19 (m, 5H), 2.05–2.01 (m, 1H), 1.88–1.79 (m, 2H), 1.74–1.57 (m, 7H), 1.44–1.37 (m, 2H), 1.19 (s, 3H), 1.14–1.04 (m, 2H), 0.99–0.93 (m, 1H), 0.89 (s, 3H); <sup>13</sup>C NMR (100 MHz, CDCl<sub>3</sub>) δ 199.7, 171.0, 167.9, 135.4, 129.7, 129.6 (C'), 125.0 (q, *J* = 276.5 Hz) 124.1, 83.9, 83.9 (C'), 70.1 (q, *J* = 32.4 Hz, C), 70.0 (q, *J* = 32.1 Hz, C'), 53.8, 50.3, 43.0, 38.7, 36.8, 35.8, 35.5, 34.0, 33.6, 33.5 (C'), 32.9, 31.6, 27.6, 23.7, 20.7, 17.5, 12.3; <sup>19</sup>F NMR (375 MHz, CDCl<sub>3</sub>) δ –79.5 (d, *J* = 6.0 Hz, 3F), –79.6 (d, *J* = 6.0 Hz, 3F'). IR (ATR): 3355, 2937, 2855, 1711, 1659, 1435, 1376, 1275, 1170, 1126, 1036, 730 cm<sup>-1</sup>. HRMS (ESI, m/z): calcd for C<sub>25</sub>H<sub>34</sub>F<sub>3</sub>O<sub>4</sub><sup>+</sup> (M+H)<sup>+</sup>: 455.2404; Found: 455.2394.

**(4*S*,5'*R*,6*aR*,6*bS*,8*aS*,8*bR*,9*S*,10*R*,11*aS*,12*aS*,12*bS*)-5',6*a*,8*a*,9-tetramethyl-1,3,3',4,4',5,5',6,6*a*,6*b*,6',7,8,8*a*,8*b*,9,11*a*,12,12*a*,12*b*-icosahydrospiro[naphtho[2',1':4,5]indeno[2,1-*b*]furan-10,2'-pyran]-4-yl 5,5,5-trifluoro-4-hydroxy-2-methylenepentanoate (9am)**

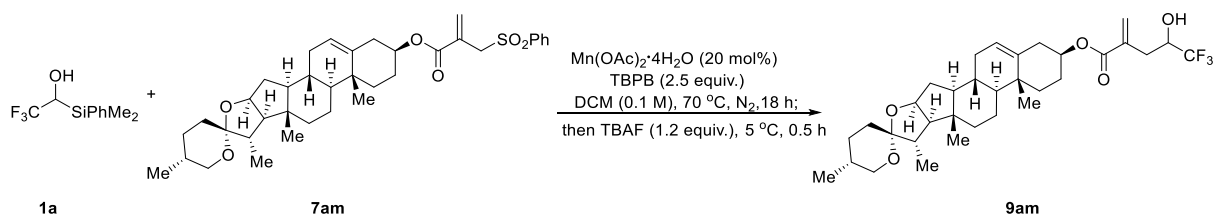

Under N<sub>2</sub> atmosphere, to a dried 10 mL Schlenk tube equipped with a magnetic stir bar containing Mn(OAc)<sub>2</sub>•4H<sub>2</sub>O (14.7 mg, 0.06 mmol, 20 mol%), **7am** (373.5 mg, 0.6 mmol, 2.0 equiv.) was added DCM (3 mL, 0.1 M), **1a** (70.2 mg,



0.3 mmol) and TBPB (145.7 mg, 0.75 mmol, 2.5 equiv.) sequentially. The tube was sealed, and the resulting mixture was kept stirring at 70 °C in heating block for 18 h. After which the mixture was cooled to 5 °C with ice bath, TBAF (1.0 M in THF, 0.36 mL, 0.36 mmol, 1.2 equiv.) was added and the mixture was stirred at 5 °C for 0.5 h. The reaction mixture was quenched with water (2 mL), extracted with DCM (3×10 mL) and organic phase was combined and washed with brine, dried over Na<sub>2</sub>SO<sub>4</sub>, concentrated under reduced pressure. The crude product was purified with column chromatography on silica gel (200~300 mesh) and PE/EA (12/1, v/v) as eluent to afford 108.0 mg of the title compound as a white solid (62 % yield).

R<sub>f</sub> = 0.29 (PE/EA = 10/1, v/v). mp: 163 °C–165 °C (from EA and PE). NMR Spectroscopy: <sup>1</sup>H NMR (400 MHz, CDCl<sub>3</sub>) δ 6.33 (s, 1H), 5.79 (s, 1H), 5.40 (d, *J* = 4.0 Hz, 1H), 4.73–4.65 (m, 1H), 4.41 (q, *J* = 7.4 Hz, 1H), 4.12–4.09 (m, 1H), 3.64 (s, 1H), 3.49–3.34 (m, 2H), 2.77–2.58 (m, 2H), 2.38 (d, *J* = 7.6 Hz, 2H), 2.03–1.96 (m, 2H), 1.90–1.84 (m, 3H), 1.80–1.42 (m, 12H), 1.33–1.12 (m, 4H), 1.05 (s, 3H), 0.98–0.96 (m, 4H), 0.79–0.78 (m, 6H); <sup>13</sup>C NMR (100 MHz, CDCl<sub>3</sub>) δ 167.5, 139.5, 135.6, 129.5, 125.0 (q, *J* = 280.0 Hz), 122.9, 109.4, 81.0, 75.6, 70.2 (q, *J* = 30.1 Hz), 67.0, 62.2, 56.6, 50.1, 41.8, 40.4, 39.9, 38.1, 37.0, 36.9, 33.6, 33.6, 32.2, 32.0, 31.6, 30.4, 29.0, 27.8, 21.0, 19.5, 17.3, 16.4, 14.7; <sup>19</sup>F NMR (375 MHz, CDCl<sub>3</sub>) δ -79.5 (d, *J* = 6.0 Hz, 3F). IR (ATR): 3422, 2948, 2904, 1711, 1633, 1454, 1331, 1275, 1170, 1129, 1051, 734 cm<sup>-1</sup>. HRMS (ESI, m/z): calcd for C<sub>33</sub>H<sub>48</sub>F<sub>3</sub>O<sub>5</sub><sup>+</sup> (M+H)<sup>+</sup>: 581.3448; Found: 581.3435.

**(*R*)-2,5,7,8-tetramethyl-2-((4*R*,8*R*)-4,8,12-trimethyltridecyl)chroman-6-yl  
5,5,5-trifluoro-4-hydroxy-2-methylenepentanoate (**9an**)**

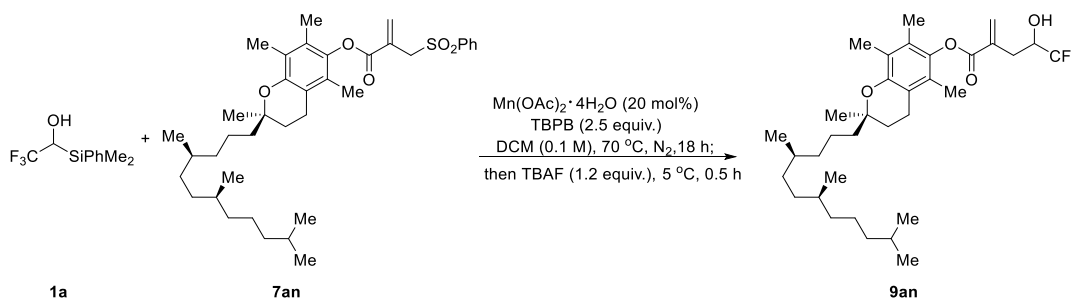

Under N<sub>2</sub> atmosphere, to a dried 10 mL Schlenk tube equipped with a magnetic stir bar containing Mn(OAc)<sub>2</sub>·4H<sub>2</sub>O (14.7 mg, 0.06 mmol, 20 mol%), **7an** (297.6 mg, 0.6 mmol, 2.0 equiv.) was added DCM (3 mL, 0.1 M), **1a** (70.2 mg, 0.3 mmol) and TBPB (145.7 mg, 0.75 mmol, 2.5 equiv.) sequentially. The tube was sealed, and the resulting mixture was kept stirring at 70 °C in heating block for 18 h. After which the mixture was cooled to 5 °C with ice bath, TBAF (1.0 M in THF, 0.36 mL, 0.36 mmol, 1.2 equiv.) was added and the mixture was stirred at 5 °C for 0.5 h. The reaction mixture was quenched with water (2 mL), extracted with DCM (3×10 mL) and organic phase was combined and washed with brine, dried over Na<sub>2</sub>SO<sub>4</sub>, concentrated under reduced pressure. The crude product was purified with column chromatography on silica gel (200~300 mesh) and PE/EA (15/1 ~ 10/1, v/v) as eluent to afford 131.0 mg of the title compound as a colorless oil (73% yield).

R<sub>f</sub> = 0.41 (PE/EA = 8/1, v/v). NMR Spectroscopy: <sup>1</sup>H NMR (400 MHz, CDCl<sub>3</sub>) δ 6.68 (s, 1H), 6.01 (s, 1H), 4.23–4.20 (m, 1H), 2.91–2.72 (m, 3H), 2.62–2.59 (m, 2H), 2.11 (s, 3H), 2.01 (s, 3H), 1.97 (s, 3H), 1.87–1.77 (m, 2H), 1.56–1.06 (m, 23H), 0.88–0.84 (m, 13H); <sup>13</sup>C NMR (100 MHz, CDCl<sub>3</sub>) δ 167.0, 149.8, 140.4, 134.8, 131.1, 126.7, 125.0, 124.9 (q, *J* = 280.0 Hz), 123.4, 117.7, 75.3, 70.1 (q, *J* = 30.8 Hz), 39.5, 37.6, 37.4, 33.8, 32.9, 31.2 (q, *J* = 27.5 Hz), 28.1, 24.9, 24.6, 22.9, 22.8, 21.1, 20.7, 19.9, 19.8, 13.0, 12.2, 12.0; <sup>19</sup>F NMR (375 MHz, CDCl<sub>3</sub>) δ -79.3 (bs, 3F). IR (ATR): 3265, 2930, 2866, 1730, 1636, 1461, 1342, 1275, 1167, 1133, 1051, 731 cm<sup>-1</sup>. HRMS (ESI, m/z): calcd for C<sub>35</sub>H<sub>55</sub>F<sub>3</sub>NaO<sub>4</sub><sup>+</sup> (M+Na)<sup>+</sup>: 619.3945; Found: 619.3960.

**(8*R*,9*S*,13*S*,14*S*)-13-methyl-17-oxo-7,8,9,11,12,13,14,15,16,17-decahydro-6*H*-cyclopenta[*a*]phenanthrene-3-yl 5,5,5-trifluoro-4-((dimethyl(phenyl)silyloxy)-2-methylenepentanoate (9ao)**

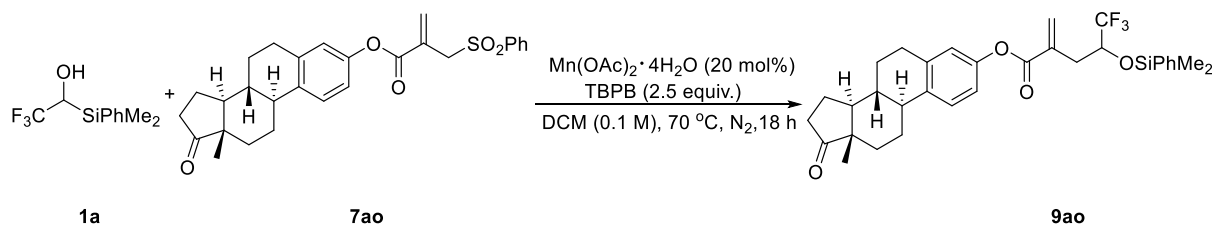

Under N<sub>2</sub> atmosphere, to a dried 10 mL Schlenk tube equipped with a magnetic stir bar containing Mn(OAc)<sub>2</sub>·4H<sub>2</sub>O (14.7 mg, 0.06 mmol, 20 mol%), **7ao** (286.8 mg, 0.6 mmol, 2.0 equiv.) was added DCM (3 mL, 0.1 M), **1a** (70.2 mg, 0.3 mmol) and TBPB (145.7 mg, 0.75 mmol, 2.5 equiv.) sequentially. The tube was sealed, and the resulting mixture was kept stirring at 70 °C in heating block for 18 h. The reaction mixture was quenched with water (2 mL), extracted with DCM (3×10 mL) and organic phase was combined and washed with brine, dried over Na<sub>2</sub>SO<sub>4</sub>, concentrated under reduced pressure. The crude product was purified with flash column chromatography on silica gel (200~300 mesh) and PE/EA (6/1, v/v) as eluent to afford 80.0 mg of the title compound as a white solid (46% yield).

R<sub>f</sub> = 0.23 (PE/EA = 4/1, v/v). mp: 82 °C–84 °C. NMR Spectroscopy: <sup>1</sup>H NMR (400 MHz, CDCl<sub>3</sub>) δ 7.56 (d, *J* = 6.4 Hz, 2H), 7.42–7.36 (m, 3H), 7.30 (d, *J* = 8.6 Hz, 1H), 6.79 (d, *J* = 8.6 Hz, 1H), 6.74 (s, 1H), 6.49 (s, 1H), 5.85 (s, 1H), 4.31–4.25 (m, 1H), 2.93–2.85 (m, 3H), 2.59–2.49 (m, 2H), 2.44–2.41 (m, 1H), 2.33–2.29 (m, 1H), 2.21–1.97 (m, 4H), 1.70–1.44 (m, 6H), 0.93 (s, 3H), 0.42–0.42 (m, 6H); <sup>13</sup>C NMR (100 MHz, CDCl<sub>3</sub>) δ 221.0, 165.2, 148.5, 138.3, 137.7, 136.2, 134.3, 133.8, 131.8, 130.2, 128.08, 126.6, 124.9 (q, *J* = 275.5 Hz), 121.6, 118.7, 70.0 (q, *J* = 30.8 Hz), 50.5, 48.1, 44.3, 38.1, 36.0, 34.7, 31.7, 29.5, 26.6, 25.9, 21.7, 14.0, –1.2, –1.4; <sup>19</sup>F NMR (375 MHz, CDCl<sub>3</sub>) δ –78.4 (m, 3F). IR (ATR): 3425, 2922, 2855, 1733, 1636, 1405, 1334, 1282, 1155, 1118, 1044, 700 cm<sup>-1</sup>. HRMS (ESI, *m/z*): calcd for C<sub>32</sub>H<sub>37</sub>F<sub>3</sub>NaO<sub>4</sub>Si<sup>+</sup> (M+Na)<sup>+</sup>: 593.2305; Found: 593.2294.

**(8*R*,9*S*,13*S*,14*S*,17*S*)-3-(benzyloxy)-13-methyl-7,8,9,11,12,13,14,15,16,17-decahydro-6*H*-cyclopenta[*a*]phenanthren-1-yl 5,5,5-trifluoro-4-hydroxy-2-methylenepentanoate (9ap)**

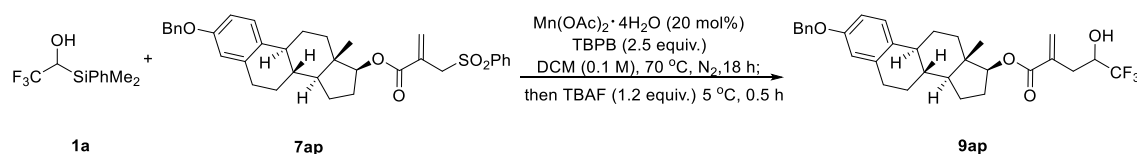

Under N<sub>2</sub> atmosphere, to a dried 10 mL Schlenk tube equipped with a magnetic stir bar containing Mn(OAc)<sub>2</sub>·4H<sub>2</sub>O (14.7 mg, 0.06 mmol, 20 mol%), **7ap** (342.0 mg, 0.6 mmol, 2.0 equiv.) was added DCM (3 mL, 0.1 M), **1a** (70.2 mg, 0.3 mmol) and TBPB (145.7 mg, 0.75 mmol, 2.5 equiv.) sequentially. The tube was sealed, and the resulting mixture was kept stirring at 70 °C in heating block for 18 h. After which the mixture was cooled to 5 °C with ice bath, TBAF (1.0 M in THF, 0.36 mL, 0.36 mmol, 1.2 equiv.) was added and the mixture was stirred at 5 °C for 0.5 h. The reaction mixture was quenched with water (2 mL), extracted with DCM (3×10 mL) and organic phase was combined and washed with brine, dried over Na<sub>2</sub>SO<sub>4</sub>, concentrated under reduced pressure. The crude product was purified with column chromatography on silica gel (200~300 mesh) and PE/EA (15/1~ 8/1, v/v) as eluent to afford 112.0 mg of the title compound as a white solid (71% yield).

R<sub>f</sub> = 0.20 (PE/EA = 8/1 v/v). mp: 106 °C–108 °C. NMR Spectroscopy: <sup>1</sup>H NMR (400 MHz, CDCl<sub>3</sub>) δ 7.46–7.37 (m, 4H), 7.35–7.31 (m, 1H), 7.21 (d, *J* = 8.6 Hz, 1H), 6.80 (dd, *J* = 8.6, 2.8 Hz, 1H), 6.74 (d, *J* = 2.8 Hz, 1H), 6.37 (s, 1H), 5.81 (s, 1H), 5.04 (s, 2H), 4.81–4.76 (m, 1H), 4.19–4.11 (m, 1H), 2.90–2.60 (m, 4H), 2.34–2.21 (m, 3H), 1.93–1.89 (m, 2H), 1.84–1.76 (m, 1H), 1.67–1.58 (m, 1H), 1.55–1.27 (m, 6H), 0.90 (s, 3H); <sup>13</sup>C NMR (100 MHz, CDCl<sub>3</sub>) δ 168.1, 168.0 (C'), 156.9, 138.0, 137.4, 135.4, 132.7, 129.7, 129.6 (C'), 128.67, 127.98, 127.57, 126.48, 124.9 (q, *J* = 280.8 Hz), 114.9, 112.4, 84.2, 84.2 (C'), 70.1 (q, *J* = 30.9 Hz, C), 70.1 (q, *J* = 30.9 Hz, C'), 70.1, 69.6, 49.8, 43.9, 43.4, 38.6, 37.1, 37.1 (C'), 33.5, 27.7, 27.3, 26.3, 23.4, 12.4 12.3 (C'); <sup>19</sup>F NMR (375 MHz, CDCl<sub>3</sub>) δ –79.4 (d, *J* = 6.0 Hz, 3F), –79.5 (d, *J* = 6.0 Hz, 3F'). IR (ATR): 3422, 2922, 2851, 1707, 1610, 1453, 1312, 1275, 1170, 1129, 1025, 731 cm<sup>-1</sup>. HRMS (ESI, *m/z*): calcd for C<sub>31</sub>H<sub>35</sub>F<sub>3</sub>NaO<sub>4</sub><sup>+</sup> (M+Na)<sup>+</sup>: 551.2380; Found: 551.2389.

## Synthesis of $\alpha$ -trifluoromethylated alkyl alcohols

### 3-Methyl-1-phenyl-3-(3,3,3-trifluoro-2-hydroxypropyl)indolin-2-one (11a)

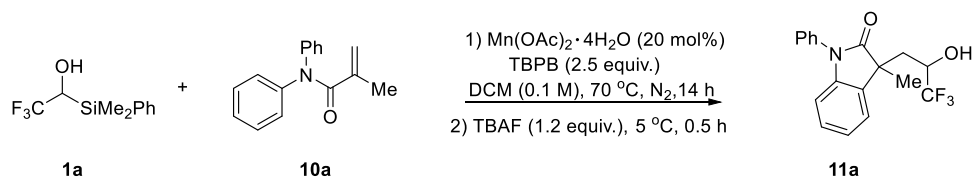

Under N<sub>2</sub> atmosphere, to a dried 25 mL Schlenk tube equipped with a magnetic stir bar containing Mn(OAc)<sub>2</sub>·4H<sub>2</sub>O (29.4 mg, 0.12 mmol, 20 mol%), **10a** (170.7 mg, 0.72 mmol, 1.2 equiv.) was added DCM (6 mL, 0.1 M), **1a** (140.4 mg, 0.6 mmol) and TBPB (291.5 mg, 1.5 mmol, 2.5 equiv.) sequentially. The tube was sealed, and the resulting mixture was kept stirring at 70 °C in heating block for 14 h. Then, the reaction was moved to 5 °C, and TBAF (188.3 mg, 0.72 mmol, 1.2 equiv.) was added, and the resulting mixture was stirred for 30 min. Then, the reaction mixture was quenched with water (8 mL), extracted with DCM (3×20 mL) and organic phase was combined and washed with saturated sodium carbonate solution and brine, dried over Na<sub>2</sub>SO<sub>4</sub>, concentrated under reduced pressure. The crude product was purified with column chromatography on silica gel (300–400 mesh) and PE/EA (10/1~5/1, v/v) as eluent to afford 183.0 mg of the title compound as a white solid (91% yield, the yield of two diastereomers).

More polar diastereomer: R<sub>f</sub> = 0.32 (PE/EA = 5/1 v/v). mp: 116 °C–118 °C. NMR Spectroscopy: <sup>1</sup>H NMR (400 MHz, CDCl<sub>3</sub>) δ 7.54–7.49 (m, 2H), 7.43–7.39 (m, 3H), 7.26–7.22 (m, 2H), 7.16–7.12 (m, 1H), 6.85–6.82 (m, 1H), 3.66–3.57 (m, 1H), 2.53–2.22 (m, 2H), 1.91 (s, 1H), 1.54 (s, 3H); <sup>13</sup>C NMR (150 MHz, CDCl<sub>3</sub>) δ 180.4, 143.8, 134.6, 131.6, 129.8, 128.6, 128.3, 126.8, 124.8 (q, *J* = 280.3 Hz), 123.4, 122.9, 110.0, 68.7 (q, *J* = 31.2 Hz), 46.1, 37.8, 25.8; <sup>19</sup>F NMR (375 MHz, CDCl<sub>3</sub>) δ -80.0 (d, *J* = 7.2 Hz, 3F). IR (ATR): 3377, 3056, 2967, 2926, 1703, 1610, 1506, 1379, 1282, 1163, 1126, 1028, 854, 760 cm<sup>-1</sup>. HRMS (ESI, m/z): calcd for C<sub>18</sub>H<sub>16</sub>F<sub>3</sub>NO<sub>2</sub>Na<sup>+</sup> (M+Na)<sup>+</sup>: 358.1025; Found: 358.1012.

### 1,3-Dimethyl-3-(3,3,3-trifluoro-2-hydroxypropyl)indolin-2-one (11b)

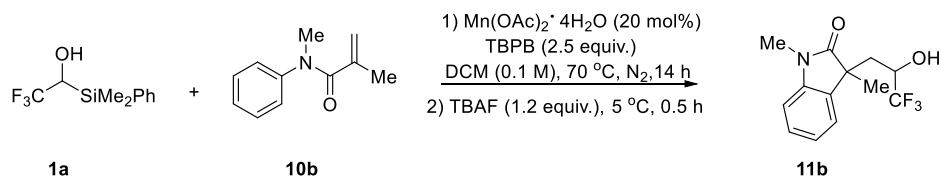

Under N<sub>2</sub> atmosphere, to a dried 25 mL Schlenk tube equipped with a magnetic stir bar containing Mn(OAc)<sub>2</sub>·4H<sub>2</sub>O (29.4 mg, 0.12 mmol, 20 mol%), **10b** (126.1 mg, 0.72 mmol, 1.2 equiv.) was added DCM (6 mL, 0.1 M), **1a** (140.4 mg, 0.6 mmol) and TBPB (291.5 mg, 1.5 mmol, 2.5 equiv.) sequentially. The tube was sealed, and the resulting mixture was kept stirring at 70 °C in heating block for 14 h. Then, the reaction was moved to 5 °C, and TBAF (188.3 mg, 0.72 mmol, 1.2 equiv.) was added, and the resulting mixture was stirred for 30 min. Then, the reaction mixture was quenched with water (8 mL), extracted with DCM (3×20 mL) and organic phase was combined and washed with saturated sodium carbonate solution and brine, dried over Na<sub>2</sub>SO<sub>4</sub>, concentrated under reduced pressure. The crude product was purified with column chromatography on silica gel (300–400 mesh) and PE/EA (5/1~2/1, v/v) as eluent to afford 124.6 mg of the title compound as a light yellow solid (76% yield, the yield of two diastereomers).

More polar diastereomer: R<sub>f</sub> = 0.34 (PE/EA = 2/1 v/v). mp: 99 °C–100 °C. NMR Spectroscopy: <sup>1</sup>H NMR (400 MHz, CDCl<sub>3</sub>) δ 7.32 (td, *J* = 7.7, 1.4 Hz, 1H), 7.19–7.16 (m, 1H), 7.10 (td, *J* = 7.5, 1.0 Hz, 1H), 6.89 (d, *J* = 7.8 Hz, 1H), 3.58–3.49 (m, 1H), 3.21 (s, 3H), 2.43–2.13 (m, 3H), 1.42 (s, 3H); <sup>13</sup>C NMR (150 MHz, CDCl<sub>3</sub>) δ 180.9, 143.6, 132.1, 128.7, 124.8 (q, *J* = 280.2 Hz), 123.0, 122.6, 108.8, 68.4 (q, *J* = 31.3 Hz), 46.0, 37.4, 26.6, 25.4. <sup>19</sup>F NMR (375 MHz, CDCl<sub>3</sub>) δ -80.2 (d, *J* = 7.5 Hz, 3F). IR (ATR): 3377, 3056, 2967, 2930, 1696, 1614, 1495, 1379, 1353, 1308, 1279, 1167, 1122, 1028, 954, 757 cm<sup>-1</sup>. HRMS (ESI, m/z): calcd for C<sub>13</sub>H<sub>15</sub>F<sub>3</sub>NO<sub>2</sub><sup>+</sup> (M+H)<sup>+</sup>: 274.1049; Found: 274.1041.

### 1-Benzyl-3-methyl-3-(3,3,3-trifluoro-2-hydroxypropyl)indolin-2-one (11c)

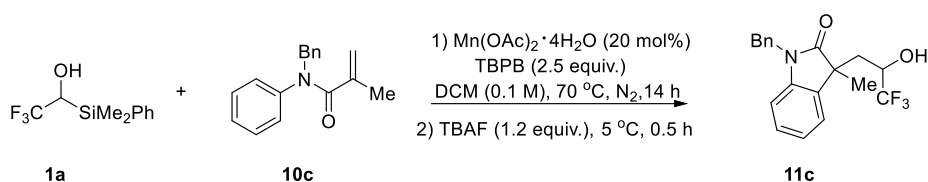

Under N<sub>2</sub> atmosphere, to a dried 25 mL Schlenk tube equipped with a magnetic stir bar containing Mn(OAc)<sub>2</sub>·4H<sub>2</sub>O (29.4 mg, 0.12 mmol, 20 mol%) was added DCM (6 mL, 0.1 M), **1a** (140.4 mg, 0.6 mmol), **10c** (180.7 mg, 0.72 mmol, 1.2 equiv.) and TBPB (291.5 mg, 1.5 mmol, 2.5 equiv.) sequentially. The tube was sealed, and the resulting mixture was kept stirring at 70 °C in heating block for 14 h. Then, the reaction was moved to 5 °C, and TBAF (188.3 mg, 0.72 mmol, 1.2 equiv.) was added, and the resulting mixture was stirred for 30 min. Then, the reaction mixture was quenched with water (8 mL), extracted with DCM (3×20 mL) and organic phase was combined and washed with saturated sodium carbonate solution and brine, dried over Na<sub>2</sub>SO<sub>4</sub>, concentrated under reduced pressure. The crude product was purified with column chromatography on silica gel (300–400 mesh) and PE/EA (10/1~5/1, v/v) as eluent to afford 164.9 mg of the title compound as a light yellow solid (79% yield, The yield of two diastereomers).

More polar diastereomer: R<sub>f</sub> = 0.36 (PE/EA = 5/1 v/v). mp: 110 °C–112 °C. NMR Spectroscopy: <sup>1</sup>H NMR (400 MHz, CDCl<sub>3</sub>) δ 7.34–7.30 (m, 4H), 7.30–7.23 (m, 1H), 7.21–7.17 (m, 2H), 7.08–7.04 (m, 1H), 6.77–6.74 (m, 1H), 4.91 (d, *J* = 1.3 Hz, 2H), 3.66–3.56 (m, 1H), 2.50–2.18 (m, 3H), 1.47 (s, 3H); <sup>13</sup>C NMR (150 MHz, CDCl<sub>3</sub>) δ 180.9, 142.7, 135.9, 132.1, 128.9, 128.5, 127.8, 127.5, 124.8 (q, *J* = 280.4 Hz), 123.0, 122.7, 109.8, 68.4 (q, *J* = 31.0 Hz), 46.1, 44.1, 37.1, 26.0; <sup>19</sup>F NMR (375 MHz, CDCl<sub>3</sub>) δ –80.0 (d, *J* = 7.4 Hz, 3F). IR (ATR): 3384, 3064, 2930, 1692, 1610, 1491, 1383, 1308, 1275, 1163, 1126, 1029, 999, 954, 790 cm<sup>-1</sup>. HRMS (ESI, *m/z*): calcd for C<sub>19</sub>H<sub>19</sub>F<sub>3</sub>NO<sub>2</sub><sup>+</sup> (M+H)<sup>+</sup>: 350.1362; Found: 350.1357.

### 7-Fluoro-1,3-dimethyl-3-(3,3,3-trifluoro-2-hydroxypropyl)indolin-2-one (11d)

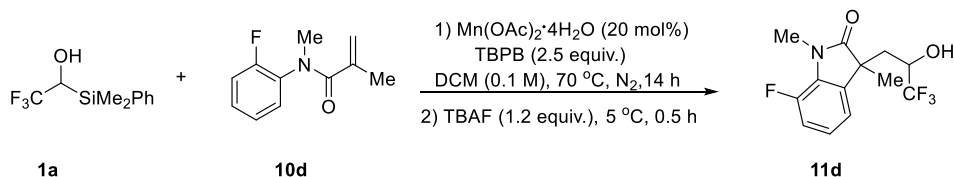

Under N<sub>2</sub> atmosphere, to a dried 25 mL Schlenk tube equipped with a magnetic stir bar containing Mn(OAc)<sub>2</sub>·4H<sub>2</sub>O (29.4 mg, 0.12 mmol, 20 mol%) was added DCM (6 mL, 0.1 M), **1a** (140.4 mg, 0.6 mmol), **10d** (138.9 mg, 0.72 mmol, 1.2 equiv.) and TBPB (291.5 mg, 1.5 mmol, 2.5 equiv.) sequentially. The tube was sealed, and the resulting mixture was kept stirring at 70 °C in heating block for 14 h. Then, the reaction was moved to 5 °C, and TBAF (188.3 mg, 0.72 mmol, 1.2 equiv.) was added, and the resulting mixture was stirred for 30 min. Then, the reaction mixture was quenched with water (8 mL), extracted with DCM (3×20 mL) and organic phase was combined and washed with saturated sodium carbonate solution and brine, dried over Na<sub>2</sub>SO<sub>4</sub>, concentrated under reduced pressure. The crude product was purified with column chromatography on silica gel (300–400 mesh) and PE/EA (10/1~5/1, v/v) as eluent to afford 139.1 mg of the title compound as a white solid (80% yield, The yield of two diastereomers).

More polar diastereomer: R<sub>f</sub> = 0.26 (PE/EA = 5/1 v/v). mp: 111 °C–113 °C. NMR Spectroscopy: <sup>1</sup>H NMR (400 MHz, CDCl<sub>3</sub>) δ 7.06–7.00 (m, 2H), 6.98–6.93 (m, 1H), 3.60–3.47 (m, 1H), 3.41 (d, *J* = 2.6 Hz, 3H), 2.58 (d, *J* = 8.3 Hz, 1H), 2.43–2.10 (m, 2H), 1.41 (s, 3H); <sup>13</sup>C NMR (150 MHz, CDCl<sub>3</sub>) δ 180.5, 148.2 (d, *J* = 243.0 Hz), 135.1 (d, *J* = 3.2 Hz), 130.3 (d, *J* = 8.1 Hz), 124.7 (q, *J* = 280.2 Hz), 123.6 (d, *J* = 6.4 Hz), 118.4 (d, *J* = 3.1 Hz), 116.7 (d, *J* = 19.1 Hz), 68.3 (q, *J* = 31.3 Hz), 46.3 (d, *J* = 1.9 Hz), 37.5, 29.0 (d, *J* = 5.9 Hz), 25.5; <sup>19</sup>F NMR (375 MHz, CDCl<sub>3</sub>) δ –80.1 (d, *J* = 7.3 Hz, 3F), –135.5– –135.6 (m, 1F). IR (ATR): 3384, 2974, 2930, 1700, 1633, 1599, 1484, 1375, 1279, 1241, 1167, 1118, 1029, 910, 783, 738 cm<sup>-1</sup>. HRMS (ESI, *m/z*): calcd for C<sub>13</sub>H<sub>13</sub>F<sub>4</sub>NO<sub>2</sub>Na<sup>+</sup> (M+Na)<sup>+</sup>: 314.0775; Found: 314.0764.

### 5-Fluoro-1,3-dimethyl-3-(3,3,3-trifluoro-2-hydroxypropyl)indolin-2-one (11e)

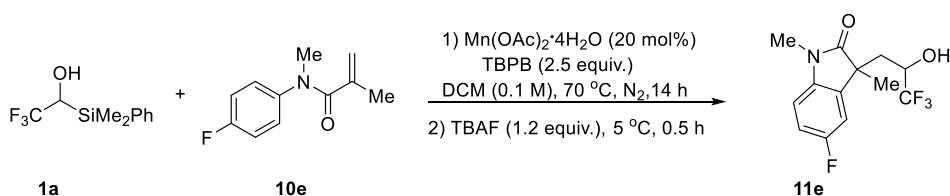

Under N<sub>2</sub> atmosphere, to a dried 25 mL Schlenk tube equipped with a magnetic stir bar containing Mn(OAc)<sub>2</sub>·4H<sub>2</sub>O (29.4 mg, 0.12 mmol, 20 mol%) was added DCM (6 mL, 0.1 M), **1a** (140.4 mg, 0.6 mmol), **10e** (138.9 mg, 0.72 mmol, 1.2 equiv.) and TBPB (291.5 mg, 1.5 mmol, 2.5 equiv.) sequentially. The tube was sealed, and the resulting mixture was kept stirring at 70 °C in heating block for 14 h. Then, the reaction was moved to 5 °C, and TBAF (188.3 mg, 0.72 mmol, 1.2 equiv.) was added, and the resulting mixture was stirred for 30 min. Then, the reaction mixture was quenched with water (8 mL), extracted with DCM (3×20 mL) and organic phase was combined and washed with saturated sodium carbonate solution and brine, dried over Na<sub>2</sub>SO<sub>4</sub>, concentrated under reduced pressure. The crude product was purified with column chromatography on silica gel (300–400 mesh) and PE/EA (10/1~2/1, v/v) as eluent to afford 147.4 mg of the title compound as a light yellow solid (84% yield, the yield of two diastereomers).

More polar diastereomer: R<sub>f</sub> = 0.21 (PE/EA = 2/1 v/v). mp: 164 °C–166 °C. NMR Spectroscopy: <sup>1</sup>H NMR (400 MHz, CDCl<sub>3</sub>) δ 7.05–7.00 (m, 1H), 6.94 (dd, *J* = 7.7, 2.6 Hz, 1H), 6.81 (dd, *J* = 8.5, 4.1 Hz, 1H), 3.65–3.50 (m, 1H), 3.20 (s, 3H), 2.47 (d, *J* = 8.4 Hz, 1H), 2.43–2.10 (m, 2H), 1.42 (s, 3H); <sup>13</sup>C NMR (150 MHz, CDCl<sub>3</sub>) δ 180.5, 159.6 (d, *J* = 240.2 Hz), 139.5 (d, *J* = 2.0 Hz), 133.8 (d, *J* = 7.7 Hz), 124.7 (q, *J* = 280.4 Hz), 114.9 (d, *J* = 23.3 Hz), 110.9 (d, *J* = 24.4 Hz), 109.3 (d, *J* = 8.0 Hz), 68.3 (q, *J* = 31.2 Hz), 46.5 (d, *J* = 1.8 Hz), 37.3, 26.7, 25.2; <sup>19</sup>F NMR (375 MHz, CDCl<sub>3</sub>) δ -80.1 (d, *J* = 8.2 Hz, 3F), -119.8–-119.9 (m, 1F). IR (ATR): 3396, 2922, 2855, 1692, 1621, 1498, 1375, 1312, 1275, 1234, 1170, 1126, 1029, 898, 812, 701 cm<sup>-1</sup>. HRMS (ESI, *m/z*): calcd for C<sub>13</sub>H<sub>13</sub>F<sub>4</sub>NO<sub>2</sub>Na<sup>+</sup> (M+Na)<sup>+</sup>: 314.0775; Found: 314.0765.

### 5-Iodo-1,3-dimethyl-3-(3,3,3-trifluoro-2-hydroxypropyl)indolin-2-one (11f)

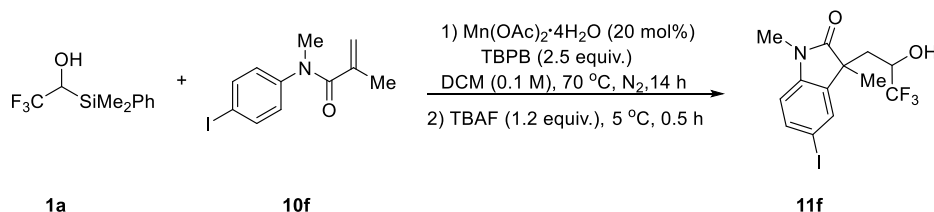

Under N<sub>2</sub> atmosphere, to a dried 25 mL Schlenk tube equipped with a magnetic stir bar containing Mn(OAc)<sub>2</sub>·4H<sub>2</sub>O (29.4 mg, 0.12 mmol, 20 mol%), **10f** (216.7 mg, 0.72 mmol, 1.2 equiv.) was added DCM (6 mL, 0.1 M), **1a** (140.4 mg, 0.6 mmol) and TBPB (291.5 mg, 1.5 mmol, 2.5 equiv.) sequentially. The tube was sealed, and the resulting mixture was kept stirring at 70 °C in heating block for 14 h. Then, the reaction was moved to 5 °C, and TBAF (188.3 mg, 0.72 mmol, 1.2 equiv.) was added, and the resulting mixture was stirred for 30 min. Then, the reaction mixture was quenched with water (8 mL), extracted with DCM (3×20 mL) and organic phase was combined and washed with saturated sodium carbonate solution and brine, dried over Na<sub>2</sub>SO<sub>4</sub>, concentrated under reduced pressure. The crude product was purified with column chromatography on silica gel (300–400 mesh) and PE/EA (10/1~2/1, v/v) as eluent to afford 172.6 mg of the title compound as a white solid (72% yield, the yield of two diastereomers).

More polar diastereomer: R<sub>f</sub> = 0.26 (PE/EA = 2/1 v/v). mp: 176 °C–178 °C. NMR Spectroscopy: <sup>1</sup>H NMR (400 MHz, CDCl<sub>3</sub>) δ 7.64 (dd, *J* = 8.1, 1.7 Hz, 1H), 7.46 (d, *J* = 1.7 Hz, 1H), 6.67 (d, *J* = 8.2 Hz, 1H), 3.65–3.54 (m, 1H), 3.18 (s, 3H), 2.42–2.10 (m, 3H), 1.41 (s, 3H); <sup>13</sup>C NMR (150 MHz, CDCl<sub>3</sub>) δ 180.1, 143.3, 137.6, 134.6, 131.5, 124.7 (q, *J* = 280.1 Hz), 110.8, 85.4, 68.3 (q, *J* = 31.2 Hz), 46.0, 37.1, 26.6, 25.3; <sup>19</sup>F NMR (375 MHz, CDCl<sub>3</sub>) δ -80.0 (d, *J* = 7.3 Hz, 3F). IR (ATR): 3332, 2967, 2926, 1700, 1603, 1491, 1454, 1416, 1349, 1275, 1174, 1126, 1021, 880, 809, 734 cm<sup>-1</sup>. HRMS (ESI, *m/z*): calcd for C<sub>13</sub>H<sub>13</sub>F<sub>3</sub>INO<sub>2</sub>Na<sup>+</sup> (M+Na)<sup>+</sup>: 421.9835; Found: 421.9829.

### 5-Methoxy-1,3-dimethyl-3-(3,3,3-trifluoro-2-hydroxypropyl)indolin-2-one (11g)

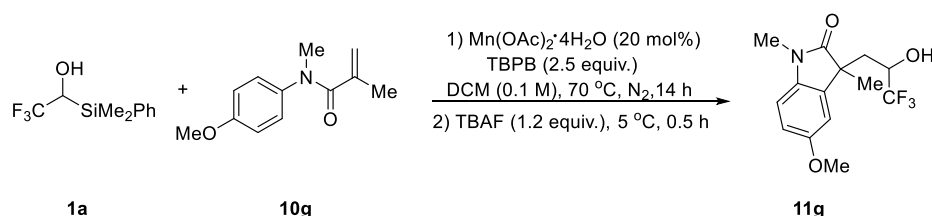

Under N<sub>2</sub> atmosphere, to a dried 25 mL Schlenk tube equipped with a magnetic stir bar containing Mn(OAc)<sub>2</sub>·4H<sub>2</sub>O (29.4 mg, 0.12 mmol, 20 mol%) was added DCM (6 mL, 0.1 M), **1a** (140.4 mg, 0.6 mmol), **10g** (147.7 mg, 0.72 mmol, 1.2 equiv.) and TBPB (291.5 mg, 1.5 mmol, 2.5 equiv.) sequentially. The tube was sealed, and the resulting mixture was kept stirring at 70 °C in heating block for 14 h. Then, the reaction was moved to 5 °C, and TBAF (188.3 mg, 0.72 mmol, 1.2 equiv.) was added, and the resulting mixture was stirred for 30 min. Then, the reaction mixture was quenched with water (8 mL), extracted with DCM (3×20 mL) and organic phase was combined and washed with saturated sodium carbonate solution and brine, dried over Na<sub>2</sub>SO<sub>4</sub>, concentrated under reduced pressure. The crude product was purified with column chromatography on silica gel (300–400 mesh) and PE/EA (10/1~2/1, v/v) as eluent to afford 129.4 mg of the title compound as a white solid (71% yield, the yield of two diastereomers).

More polar diastereomer: R<sub>f</sub> = 0.17 (PE/EA = 2/1 v/v). mp: 145 °C–147 °C. NMR Spectroscopy: <sup>1</sup>H NMR (400 MHz, CDCl<sub>3</sub>) δ 6.84–6.82 (m, 1H), 6.80–6.78 (m, 2H), 3.81 (s, 3H), 3.62–3.53 (m, 1H), 3.19 (s, 3H), 2.57 (d, *J* = 8.4 Hz, 1H), 2.41–2.10 (m, 2H), 1.41 (s, 3H); <sup>13</sup>C NMR (150 MHz, CDCl<sub>3</sub>) δ 180.6, 156.4, 137.0, 133.6, 124.8 (q, *J* = 280.3 Hz), 112.4, 110.4, 109.1, 68.4 (q, *J* = 31.2 Hz), 56.0, 46.5, 37.4, 26.7, 25.4; <sup>19</sup>F NMR (375 MHz, CDCl<sub>3</sub>) δ –80.1 (d, *J* = 6.4 Hz, 3F). IR (ATR): 3377, 2930, 1692, 1603, 1498, 1435, 1372, 1282, 1167, 1126, 1040, 805, 698 cm<sup>-1</sup>. HRMS (ESI, *m/z*): calcd for C<sub>14</sub>H<sub>17</sub>F<sub>3</sub>NO<sub>3</sub><sup>+</sup> (M+H)<sup>+</sup>: 304.1155; Found: 304.1143.

### 1-Methyl-1-(3,3,3-trifluoro-2-hydroxypropyl)-5,6-dihydro-1H-pyrrolo[3,2,1-ij]quinolin-2(4H)-one (11h)

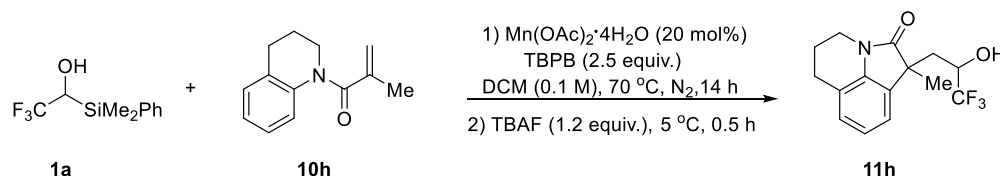

Under N<sub>2</sub> atmosphere, to a dried 25 mL Schlenk tube equipped with a magnetic stir bar containing Mn(OAc)<sub>2</sub>·4H<sub>2</sub>O (29.4 mg, 0.12 mmol, 20 mol%), **10h** (144.8 mg, 0.72 mmol, 1.2 equiv.) was added DCM (6 mL, 0.1 M), **1a** (140.4 mg, 0.6 mmol) and TBPB (291.5 mg, 1.5 mmol, 2.5 equiv.) sequentially. The tube was sealed, and the resulting mixture was kept stirring at 70 °C in heating block for 14 h. Then, the reaction was moved to 5 °C, and TBAF (188.3 mg, 0.72 mmol, 1.2 equiv.) was added, and the resulting mixture was stirred for 30 min. Then, the reaction mixture was quenched with water (8 mL), extracted with DCM (3×20 mL) and organic phase was combined and washed with saturated sodium carbonate solution and brine, dried over Na<sub>2</sub>SO<sub>4</sub>, concentrated under reduced pressure. The crude product was purified with column chromatography on silica gel (300–400 mesh) and PE/EA (10/1~1.5/1, v/v) as eluent to afford 138.1 mg of the title compound as a light yellow solid (77% yield, the yield of two diastereomers).

More polar diastereomer: R<sub>f</sub> = 0.48 (PE/EA = 1.5/1 v/v). mp: 69 °C–72 °C. NMR Spectroscopy: <sup>1</sup>H NMR (400 MHz, CDCl<sub>3</sub>) δ 7.07–6.96 (m, 3H), 3.76–3.64 (m, 2H), 3.61–3.53 (m, 1H), 2.81–2.78 (m, 2H), 2.41–2.12 (m, 2H), 2.05–1.98 (m, 2H), 1.42 (s, 3H); <sup>13</sup>C NMR (150 MHz, CDCl<sub>3</sub>) δ 179.8, 139.3, 130.6, 127.4, 124.9 (q, *J* = 280.3 Hz), 122.4, 120.9, 120.4, 68.4 (q, *J* = 31.0 Hz), 47.4, 39.1, 37.3, 25.1, 24.7, 21.2; <sup>19</sup>F NMR (375 MHz, CDCl<sub>3</sub>) δ –80.1 (d, *J* = 6.2 Hz, 3F). IR (ATR): 3377, 2963, 2930, 2874, 1692, 1638, 1484, 1394, 1361, 1279, 1163, 1126, 958, 783, 697 cm<sup>-1</sup>. HRMS (ESI, *m/z*): calcd for C<sub>15</sub>H<sub>17</sub>F<sub>3</sub>NO<sub>2</sub><sup>+</sup> (M+H)<sup>+</sup>: 300.1206; Found: 300.1201.

### Methyl 1,3-dimethyl-2-oxo-3-(3,3,3-trifluoro-2-hydroxypropyl)indoline-5-carboxylate (11i)

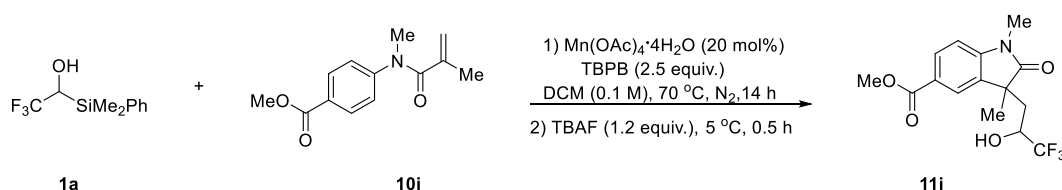

Under N<sub>2</sub> atmosphere, to a dried 25 mL Schlenk tube equipped with a magnetic stir bar containing Mn(OAc)<sub>2</sub>·4H<sub>2</sub>O (29.4 mg, 0.12 mmol, 20 mol%), **10i** (167.8 mg, 0.72 mmol, 1.2 equiv.) was added DCM (6 mL, 0.1 M), **1a** (140.4 mg, 0.6 mmol) and TBPB (291.5 mg, 1.5 mmol, 2.5 equiv.) sequentially. The tube was sealed, and the resulting mixture was kept stirring at 70 °C in heating block for 14 h. Then, the reaction was moved to 5 °C, and TBAF (188.3 mg, 0.72 mmol, 1.2 equiv.) was added, and the resulting mixture was stirred for 30 min. Then, the reaction mixture was quenched with water (8 mL), extracted with DCM (3×20 mL) and organic phase was combined and washed with saturated sodium carbonate solution and brine, dried over Na<sub>2</sub>SO<sub>4</sub>, concentrated under reduced pressure. The crude product was purified with column chromatography on silica gel (300–400 mesh) and PE/EA (10/1~1.5/1, v/v) as eluent to afford 125.1 mg of the title compound as a light yellow solid (63% yield, the yield of two diastereomers).

More polar diastereomer: R<sub>f</sub> = 0.39 (PE/EA = 1.5/1, v/v). mp: 118 °C–120 °C. NMR Spectroscopy: <sup>1</sup>H NMR (400 MHz, CDCl<sub>3</sub>) δ 8.05 (dd, *J* = 8.2, 1.7 Hz, 1H), 7.85 (dd, *J* = 1.7, 0.5 Hz, 1H), 6.91 (d, *J* = 7.8 Hz, 1H), 3.91 (s, 3H), 3.59–3.49 (m, 1H), 3.23 (s, 3H), 2.67 (d, *J* = 8.3 Hz, 1H), 2.45–2.16 (m, 2H), 1.43 (s, 3H); <sup>13</sup>C NMR (150 MHz, CDCl<sub>3</sub>) δ 181.2, 166.9, 147.8, 132.1, 131.4, 124.8, 124.7 (q, *J* = 280.4 Hz), 124.0, 108.2, 68.3 (q, *J* = 31.2 Hz), 52.3, 45.8, 37.2, 26.8, 25.1; <sup>19</sup>F NMR (375 MHz, CDCl<sub>3</sub>) δ -79.9 (d, *J* = 7.5 Hz, 3F). IR (ATR): 3422, 2956, 1707, 1618, 1498, 1457, 1375, 1286, 1256, 1167, 1126, 1025, 917, 835, 775, 738 cm<sup>-1</sup>. HRMS (ESI, m/z): calcd for C<sub>15</sub>H<sub>17</sub>F<sub>3</sub>NO<sub>4</sub><sup>+</sup> (M+H)<sup>+</sup>: 332.1104; Found: 332.1099.

### Synthesis of α-trifluoromethylated allylic alcohols

#### (*E*)-1,1,1-trifluoro-4-(2-fluorophenyl)but-3-en-2-ol (13a)

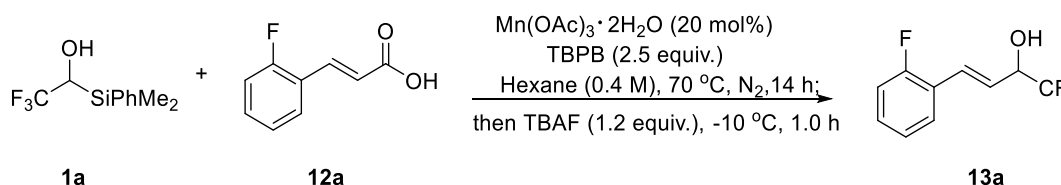

Under N<sub>2</sub> atmosphere, to a dried 10 mL Schlenk tube equipped with a magnetic stir bar containing Mn(OAc)<sub>3</sub>·2H<sub>2</sub>O (21.4 mg, 0.08 mmol, 20 mol%) and **12a** (132.8 mg, 0.8 mmol, 2.0 equiv.) was added hexane (1 mL, 0.4 M), TBPB (194.3 mg, 1.0 mmol, 2.5 equiv.) and **1a** (93.6 mg, 0.4 mmol) sequentially. The tube was sealed, and the resulting mixture was kept stirring at 70 °C in heating block for 14 h. The mixture was then cooled to -10 °C with low temperature bath, TBAF (1.0 M in THF, 0.48 mL, 0.48 mmol, 1.2 equiv.) was added and the resulting mixture was stirred at -10 °C for 1.0 h. The reaction mixture was quenched with water (2 mL), extracted with DCM (3×10 mL) and organic phase was combined and washed with brine, dried over Na<sub>2</sub>SO<sub>4</sub>, concentrated under reduced pressure. The crude product was purified with column chromatography on silica gel (200~300 mesh) and PE/EA (20/1~10/1, v/v) as eluent to afford 63.8 mg of the title compound as a colorless oil (73% yield).

R<sub>f</sub> = 0.56 (PE/EA = 4/1, v/v). NMR Spectroscopy: <sup>1</sup>H NMR (400 MHz, CDCl<sub>3</sub>) δ 7.47 (t, *J* = 7.2 Hz, 1H), 7.31–7.26 (m, 1H), 7.15–7.00 (m, 3n), 6.31 (dd, *J* = 16.2, 6.4 Hz, 1H), 4.69–4.63 (m, 1H), 2.44 (s, 1H); <sup>13</sup>C NMR (100 MHz, CDCl<sub>3</sub>) δ 160.7 (d, *J* = 250.5 Hz), 130.3 (d, *J* = 8.7 Hz), 129.0 (d, *J* = 2.9 Hz), 128.1 (d, *J* = 2.9 Hz), 124.4 (q, *J* = 273.4 Hz), 124.4 (d, *J* = 3.9 Hz), 123.4, 123.4 (d, *J* = 6.7 Hz), 116.1 (d, *J* = 22.2 Hz), 71.9 (q, *J* = 32.1 Hz); <sup>19</sup>F NMR (375 MHz, CDCl<sub>3</sub>) δ -78.9 (d, *J* = 6.0 Hz, 3F), -117.0–-117.0 (m, 1F). IR (ATR): 3396, 2922, 1659, 1491, 1457, 1267, 1174, 1125, 969, 883, 753 cm<sup>-1</sup>. HRMS (ESI, m/z): calcd for C<sub>10</sub>H<sub>6</sub>F<sub>4</sub>O<sup>-</sup> (M-H)<sup>-</sup>: 219.0439; Found: 219.0441.

**(E)-1,1,1-Trifluoro-4-(3-fluorophenyl)but-3-en-2-ol (13b)**

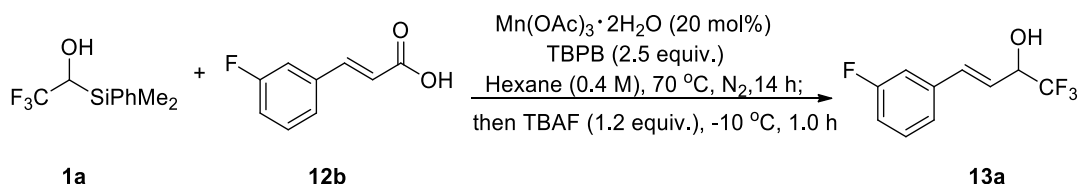

Under  $\text{N}_2$  atmosphere, to a dried 10 mL Schlenk tube equipped with a magnetic stir bar containing  $\text{Mn}(\text{OAc})_3 \cdot 2\text{H}_2\text{O}$  (21.4 mg, 0.08 mmol, 20 mol%) and **12b** (132.8 mg, 0.8 mmol, 2.0 equiv.) was added hexane (1 mL, 0.4 M), TBPB (194.3 mg, 1.0 mmol, 2.5 equiv.) and **1a** (93.6 mg, 0.4 mmol) sequentially. The tube was sealed, and the resulting mixture was kept stirring at 70 °C in heating block for 14 h. The mixture was then cooled to -10 °C with low temperature bath, TBAF (1.0 M in THF, 0.48 mL, 0.48 mmol, 1.2 equiv.) was added and the resulting mixture was stirred at -10 °C for 1.0 h. The reaction mixture was quenched with water (2 mL), extracted with DCM (3×10 mL) and organic phase was combined and washed with brine, dried over  $\text{Na}_2\text{SO}_4$ , concentrated under reduced pressure. The crude product was purified with column chromatography on silica gel (200~300 mesh) and PE/EA (20/1~10/1, v/v) as eluent to afford 52.9 mg of the title compound as a colorless oil (60% yield).

$R_f = 0.64$  (PE/EA = 4/1, v/v). NMR Spectroscopy:  $^1\text{H}$  NMR (400 MHz,  $\text{CDCl}_3$ )  $\delta$  7.33–7.28 (m, 1H), 7.18 (d,  $J = 7.6$  Hz, 1H), 7.11 (d,  $J = 9.8$  Hz, 1H), 6.99 (t,  $J = 8.3$  Hz, 1H), 6.83 (d,  $J = 15.9$  Hz, 1H), 6.20 (dd,  $J = 15.9, 6.1$  Hz, 1H), 4.66–4.63 (m, 1H), 2.39 (s, 1H);  $^{13}\text{C}$  NMR (150 MHz,  $\text{CDCl}_3$ )  $\delta$  163.20 (d,  $J = 246.3$  Hz), 137.8 (d,  $J = 8.0$  Hz), 135.1 (d,  $J = 2.6$  Hz), 130.4 (d,  $J = 8.5$  Hz), 123.0 (d,  $J = 2.8$  Hz), 124.3 (q,  $J = 280.4$  Hz), 122.2, 115.7 (d,  $J = 21.5$  Hz), 113.5 (d,  $J = 21.9$  Hz), 71.5 (q,  $J = 32.5$  Hz);  $^{19}\text{F}$  NMR (375 MHz,  $\text{CDCl}_3$ )  $\delta$  -79.0 (d,  $J = 6.0$  Hz, 3F), -112.9– -113.0 (m, 1F). IR (ATR): 3418, 2904, 1588, 1491, 1267, 1178, 1129, 969, 783  $\text{cm}^{-1}$ . HRMS (ESI, m/z): calcd for  $\text{C}_{10}\text{H}_6\text{F}_4\text{O}^-$  (M-H) $^-$ : 219.0439; Found: 219.0441.

**(E)-1,1,1-Trifluoro-4-(4-fluorophenyl)but-3-en-2-ol (13c)**

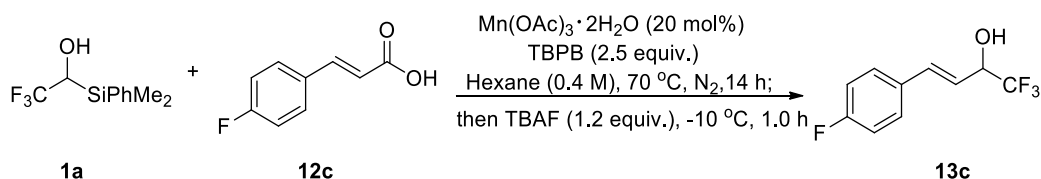

Under  $\text{N}_2$  atmosphere, to a dried 10 mL Schlenk tube equipped with a magnetic stir bar containing  $\text{Mn}(\text{OAc})_3 \cdot 2\text{H}_2\text{O}$  (21.4 mg, 0.08 mmol, 20 mol%) and **12c** (132.8 mg, 0.8 mmol, 2.0 equiv.) was added hexane (1 mL, 0.4 M), TBPB (194.3 mg, 1.0 mmol, 2.5 equiv.) and **1a** (93.6 mg, 0.4 mmol) sequentially. The tube was sealed, and the resulting mixture was kept stirring at 70 °C in heating block for 14 h. The mixture was then cooled to -10 °C with low temperature bath, TBAF (1.0 M in THF, 0.48 mL, 0.48 mmol, 1.2 equiv.) was added and the resulting mixture was stirred at -10 °C for 1.0 h. The reaction mixture was quenched with water (2 mL), extracted with DCM (3×10 mL) and organic phase was combined and washed with brine, dried over  $\text{Na}_2\text{SO}_4$ , concentrated under reduced pressure. The crude product was purified with column chromatography on silica gel (200~300 mesh) and PE/EA (20/1~10/1, v/v) as eluent to afford 56.3 mg of the title compound as a colorless oil (64% yield).

$R_f = 0.56$  (PE/EA = 4/1, v/v). NMR Spectroscopy:  $^1\text{H}$  NMR (400 MHz,  $\text{CDCl}_3$ )  $\delta$  7.38 (dd,  $J = 7.6, 5.8$  Hz, 2H), 7.04 (t,  $J = 8.7$  Hz, 2H), 6.81 (d,  $J = 15.9$  Hz, 1H), 6.12 (dd,  $J = 15.9, 6.6$  Hz, 1H), 4.66–4.59 (m, 1H), 2.78 (bs, 1H);  $^{13}\text{C}$  NMR (100 MHz,  $\text{CDCl}_3$ )  $\delta$  163.1 (d,  $J = 248.5$  Hz), 135.2, 131.7, 128.7 (d,  $J = 8.7$  Hz), 124.4 (d,  $J = 280.8$  Hz), 120.5, 115.9 (d,  $J = 21.2$  Hz), 71.7 (q,  $J = 32.4$  Hz);  $^{19}\text{F}$  NMR (375 MHz,  $\text{CDCl}_3$ )  $\delta$  -78.9 (d,  $J = 6.0$  Hz, 3F), -112.5– -112.5 (m, 1F). IR (ATR): 3377, 2049, 2919, 1662, 1603, 1510, 1264, 1174, 1126, 969, 839, 693  $\text{cm}^{-1}$ . HRMS (ESI, m/z): calcd for  $\text{C}_{10}\text{H}_6\text{F}_4\text{O}^-$  (M-H) $^-$ : 219.0439; Found: 219.0441.



**(E)-1,1,1-Trifluoro-4-(2,6-difluorophenyl)but-3-en-2-ol (13d)**

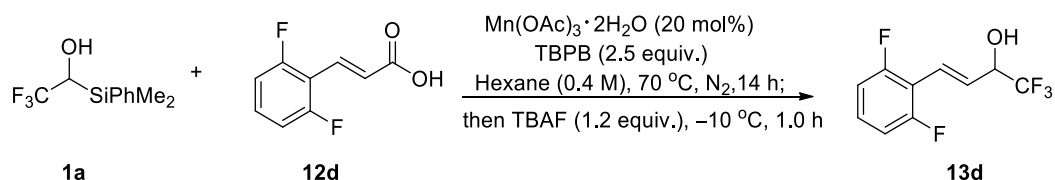

Under  $\text{N}_2$  atmosphere, to a dried 10 mL Schlenk tube equipped with a magnetic stir bar containing  $\text{Mn}(\text{OAc})_3 \cdot 2\text{H}_2\text{O}$  (21.4 mg, 0.08 mmol, 20 mol%) and **12d** (147.2 mg, 0.8 mmol, 2.0 equiv.) was added hexane (1 mL, 0.4 M), TBPB (194.3 mg, 1.0 mmol, 2.5 equiv.) and **1a** (93.6 mg, 0.4 mmol) sequentially. The tube was sealed, and the resulting mixture was kept stirring at 70 °C in heating block for 14 h. The mixture was then cooled to -10 °C with low temperature bath, TBAF (1.0 M in THF, 0.48 mL, 0.48 mmol, 1.2 equiv.) was added and the resulting mixture was stirred at -10 °C for 1.0 h. The reaction mixture was quenched with water (2 mL), extracted with DCM (3×10 mL) and organic phase was combined and washed with brine, dried over  $\text{Na}_2\text{SO}_4$ , concentrated under reduced pressure. The crude product was purified with column chromatography on silica gel (200~300 mesh) and PE/EA (20/1~10/1, v/v) as eluent to afford 69.3 mg of the title compound as a colorless oil (67% yield).

$R_f = 0.38$  (PE/EA = 4/1, v/v). NMR Spectroscopy:  $^1\text{H}$  NMR (400 MHz,  $\text{CDCl}_3$ )  $\delta$  7.26–7.18 (m, 1H), 6.95–6.88 (m, 3H), 6.56 (dd,  $J = 16.2, 6.1$  Hz, 1H), 4.66 (d,  $J = 5.8$  Hz, 1H), 2.58 (d,  $J = 5.2$  Hz, 1H);  $^{13}\text{C}$  NMR (100 MHz,  $\text{CDCl}_3$ )  $\delta$  161.2 (dd,  $J = 252.9, 7.2$  Hz), 129.6 (t,  $J = 11.1$  Hz), 127.5 (t,  $J = 7.2$  Hz), 124.3 (d,  $J = 280.8$  Hz), 122.6, 113.0 (t,  $J = 14.9$  Hz), 111.8 (dd,  $J = 19.7, 6.3$  Hz), 72.15 (q,  $J = 32.4$  Hz);  $^{19}\text{F}$  NMR (375 MHz,  $\text{CDCl}_3$ )  $\delta$  -78.9 (d,  $J = 6.0$  Hz, 3F), -112.6 (t,  $J = 7.5$  Hz, 2F). IR (ATR): 3358, 2907, 2851, 1621, 1461, 1267, 1200, 1118, 995, 876, 782  $\text{cm}^{-1}$ . HRMS (ESI, m/z): calcd for  $\text{C}_{10}\text{H}_8\text{F}_5\text{O}^+$  (M+H) $^+$ : 239.0490; Found: 239.0481.

**(E)-1,1,1-Trifluoro-4-(2,4-difluorophenyl)but-3-en-2-ol (13e)**

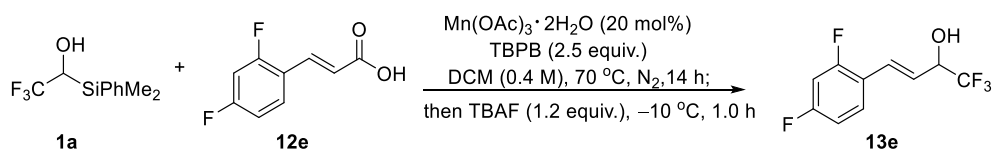

Under  $\text{N}_2$  atmosphere, to a dried 10 mL Schlenk tube equipped with a magnetic stir bar containing  $\text{Mn}(\text{OAc})_3 \cdot 2\text{H}_2\text{O}$  (21.4 mg, 0.08 mmol, 20 mol%) and **12e** (147.2 mg, 0.8 mmol, 2.0 equiv.) was added DCM (1 mL, 0.4 M), TBPB (194.3 mg, 1.0 mmol, 2.5 equiv.) and **1a** (93.6 mg, 0.4 mmol) sequentially. The tube was sealed, and the resulting mixture was kept stirring at 70 °C in heating block for 14 h. The mixture was then cooled to -10 °C with low temperature bath, TBAF (1.0 M in THF, 0.48 mL, 0.48 mmol, 1.2 equiv.) was added and the resulting mixture was stirred at -10 °C for 1.0 h. The reaction mixture was quenched with water (2 mL), extracted with DCM (3×10 mL) and organic phase was combined and washed with brine, dried over  $\text{Na}_2\text{SO}_4$ , concentrated under reduced pressure. The crude product was purified with column chromatography on silica gel (200~300 mesh) and PE/EA (20/1~10/1, v/v) as eluent to afford 60.1 mg of the title compound as a white solid (63% yield).

$R_f = 0.68$  (PE/EA = 4/1, v/v). mp: 47 °C–49 °C NMR Spectroscopy:  $^1\text{H}$  NMR (600 MHz,  $\text{CDCl}_3$ )  $\delta$  7.45 (td,  $J = 8.6, 6.3$  Hz, 2H), 6.95 (d,  $J = 16.2$  Hz, 1H), 6.91–6.85 (m, 2H), 6.85–6.79 (m, 2H), 6.24 (dd,  $J = 16.1, 6.3$  Hz, 2H), 4.68–4.62 (m, 2H), 2.44 (d,  $J = 5.3$  Hz, 2H);  $^{13}\text{C}$  NMR (150 MHz,  $\text{CDCl}_3$ )  $\delta$  163.1 (dd,  $J = 249.6, 12.0$  Hz), 160.8 (dd,  $J = 251.8, 11.7$  Hz), 129.0 (dd,  $J = 9.6, 5.0$  Hz), 128.1–128.1 (m), 124.3 (q,  $J = 282.1$  Hz), 123.0–122.9 (m), 119.8 (dd,  $J = 12.1, 4.1$  Hz), 111.9 (dd,  $J = 21.3, 3.7$  Hz), 104.5 (t,  $J = 25.4$  Hz), 71.8 (q,  $J = 32.0$  Hz);  $^{19}\text{F}$  NMR (375 MHz,  $\text{CDCl}_3$ )  $\delta$  -79.0 (d,  $J = 6.0$  Hz, 3F), -108.9– -108.8 (m, 1F), -112.7– -112.6 (m, 1F). IR (ATR): 3358, 2915, 1659, 1614, 1502, 1431, 1274, 1174, 1126, 969, 854, 731  $\text{cm}^{-1}$ . HRMS (ESI, m/z): calcd for  $\text{C}_{10}\text{H}_6\text{F}_5\text{O}^-$  (M-H) $^-$ : 237.0344; Found: 237.0346.

**(E)-1,1,1-trifluoro-4-(3,5-difluorophenyl)but-3-en-2-ol (13f)**

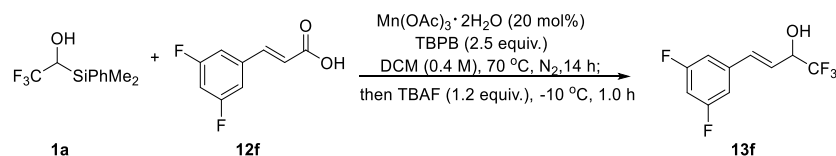

Under  $\text{N}_2$  atmosphere, to a dried 10 mL Schlenk tube equipped with a magnetic stir bar containing  $\text{Mn}(\text{OAc})_3 \cdot 2\text{H}_2\text{O}$  (21.4 mg, 0.08 mmol, 20 mol%) and **12f** (147.2 mg, 0.8 mmol, 2.0 equiv.) was added DCM (1 mL, 0.4 M), TBPB (194.3 mg, 1.0 mmol, 2.5 equiv.) and **1a** (93.6 mg, 0.4 mmol) sequentially. The tube was sealed, and the resulting mixture was kept stirring at 70 °C in heating block for 14 h. The mixture was then cooled to -10 °C with low temperature bath, TBAF (1.0 M in THF, 0.48 mL, 0.48 mmol, 1.2 equiv.) was added and the resulting mixture was stirred at -10 °C for 1.0 h. The reaction mixture was quenched with water (2 mL), extracted with DCM (3×10 mL) and organic phase was combined and washed with brine, dried over  $\text{Na}_2\text{SO}_4$ , concentrated under reduced pressure. The crude product was purified with column chromatography on silica gel (200~300 mesh) and PE/EA (20/1~10/1, v/v) as eluent to afford 71.5 mg of the title compound as a colorless oil (75% yield).

$R_f = 0.25$  (PE/EA = 10/1, v/v). NMR Spectroscopy:  $^1\text{H}$  NMR (600 MHz,  $\text{CDCl}_3$ )  $\delta$  6.94–6.92 (m, 2H), 6.80 (d,  $J = 16.0$  Hz, 1H), 6.75 (tt,  $J = 8.8, 2.3$  Hz, 1H), 6.22 (dd,  $J = 15.9, 5.9$  Hz, 1H), 4.72–4.61 (m, 1H), 2.55 (s, 1H);  $^{13}\text{C}$  NMR (150 MHz,  $\text{CDCl}_3$ )  $\delta$  163.4 (dd,  $J = 248.5, 13.0$  Hz), 138.8 (t,  $J = 9.5$  Hz), 134.0 (t,  $J = 2.8$  Hz), 124.2 (q,  $J = 32.4$  Hz), 123.5, 109.8 (dd,  $J = 20.4, 5.2$  Hz), 104.1 (t,  $J = 25.5$  Hz), 71.2 (q,  $J = 32.4$  Hz);  $^{19}\text{F}$  NMR (375 MHz,  $\text{CDCl}_3$ )  $\delta$  -78.9 (d,  $J = 6.0$  Hz, 3F), -109.6 (t,  $J = 8.9$  Hz, 2F). IR (ATR): 3384, 3094, 2904, 1621, 1595, 1439, 1267, 1118, 969, 854, 667  $\text{cm}^{-1}$ . HRMS (ESI, m/z): calcd for  $\text{C}_{10}\text{H}_6\text{F}_5\text{O}^-$  (M-H) $^-$ : 237.0344; Found: 237.0335.

**(E)-1,1,1-trifluoro-4-(4-chlorophenyl)but-3-en-2-ol (13g)**

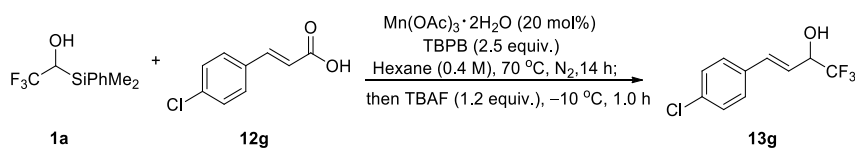

Under  $\text{N}_2$  atmosphere, to a dried 10 mL Schlenk tube equipped with a magnetic stir bar containing  $\text{Mn}(\text{OAc})_3 \cdot 2\text{H}_2\text{O}$  (21.4 mg, 0.08 mmol, 20 mol%) and **12g** (145.6 mg, 0.8 mmol, 2.0 equiv.) was added hexane (1 mL, 0.4 M), TBPB (194.3 mg, 1.0 mmol, 2.5 equiv.) and **1a** (93.6 mg, 0.4 mmol) sequentially. The tube was sealed, and the resulting mixture was kept stirring at 70 °C in heating block for 14 h. The mixture was then cooled to -10 °C with low temperature bath, TBAF (1.0 M in THF, 0.48 mL, 0.48 mmol, 1.2 equiv.) was added and the resulting mixture was stirred at -10 °C for 1.0 h. The reaction mixture was quenched with water (2 mL), extracted with DCM (3×10 mL) and organic phase was combined and washed with brine, dried over  $\text{Na}_2\text{SO}_4$ , concentrated under reduced pressure. The crude product was purified with column chromatography on silica gel (200~300 mesh) and PE/EA (20/1~10/1, v/v) as eluent to afford 63.2 mg of the title compound as a white solid (67% yield).

$R_f = 0.22$  (PE/EA = 10/1, v/v). mp: 41 °C–42 °C. NMR Spectroscopy:  $^1\text{H}$  NMR (400 MHz,  $\text{CDCl}_3$ )  $\delta$  7.36–7.31 (m, 4H), 6.82 (d,  $J = 15.9$  Hz, 1H), 6.18 (dd,  $J = 15.9, 6.1$  Hz, 1H), 4.65–4.63 (m, 1H), 2.44 (d,  $J = 4.0$  Hz, 1H);  $^{13}\text{C}$  NMR (100 MHz,  $\text{CDCl}_3$ )  $\delta$  135.1, 134.7, 134.0, 129.1, 128.3, 124.3 (q,  $J = 279.4$  Hz), 121.4, 71.6 (q,  $J = 32.1$  Hz);  $^{19}\text{F}$  NMR (375 MHz,  $\text{CDCl}_3$ )  $\delta$  -79.0 (d,  $J = 6.0$  Hz, 3F). IR (ATR): 3399, 2911, 1491, 1267, 1129, 1092, 969, 831  $\text{cm}^{-1}$ . HRMS (ESI, m/z): calcd for  $\text{C}_{10}\text{H}_7\text{ClF}_3\text{O}^-$  (M-H) $^-$ : 235.0143; Found: 237.0146.

**(E)-1,1,1-trifluoro-4-(4-bromophenyl)but-3-en-2-ol (13h)**

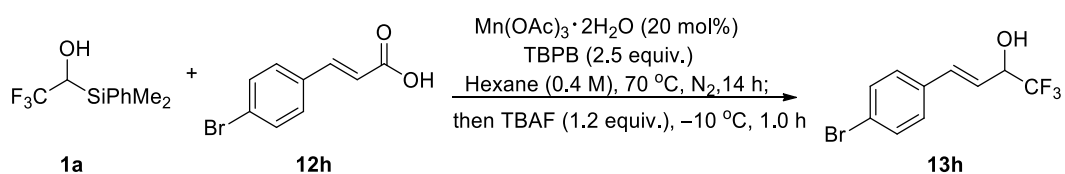

Under  $\text{N}_2$  atmosphere, to a dried 10 mL Schlenk tube equipped with a magnetic stir bar containing  $\text{Mn}(\text{OAc})_3 \cdot 2\text{H}_2\text{O}$

(21.4 mg, 0.08 mmol, 20 mol%) and **5e** (181.6 mg, 0.8 mmol, 2.0 equiv.) was added hexane (1 mL, 0.4 M), TBPB (194.3 mg, 1.0 mmol, 2.5 equiv.) and **3a** (93.6 mg, 0.4 mmol) sequentially. The tube was sealed, and the resulting mixture was kept stirring at 70 °C in heating block for 14 h. The mixture was then cooled to -10 °C with low temperature bath, TBAF (1.0 M in THF, 0.48 mL, 0.48 mmol, 1.2 equiv.) was added and the resulting mixture was stirred at -10 °C for 1.0 h. The reaction mixture was quenched with water (2 mL), extracted with DCM (3×10 mL) and organic phase was combined and washed with brine, dried over Na<sub>2</sub>SO<sub>4</sub>, concentrated under reduced pressure. The crude product was purified with column chromatography on silica gel (200~300 mesh) and PE/EA (20/1~10/1, v/v) as eluent to afford 68.6 mg of the title compound as a white solid (61% yield).

R<sub>f</sub> = 0.23 (PE/EA = 10/1, v/v). mp: 55 °C–57 °C. NMR Spectroscopy: <sup>1</sup>H NMR (400 MHz, CDCl<sub>3</sub>) δ 7.48 (d, *J* = 8.3 Hz, 2H), 7.28 (d, *J* = 8.3 Hz, 2H), 6.81 (d, *J* = 16.2 Hz, 1H), 6.19 (dd, *J* = 16.0, 6.3 Hz, 1H), 4.63 (bs, 1H), 2.46 (s, 1H); <sup>13</sup>C NMR (100 MHz, CDCl<sub>3</sub>) δ 135.1, 134.5, 132.1, 128.5, 124.3 (q, *J* = 280.8 Hz), 122.8, 121.6, 71.6 (q, *J* = 32.4 Hz); <sup>19</sup>F NMR (375 MHz, CDCl<sub>3</sub>) δ -78.9 (d, *J* = 6.0 Hz, 3F). IR (ATR): 3340, 2926, 1655, 1487, 1267, 1178, 1126, 977, 823, 697 cm<sup>-1</sup>. HRMS (ESI, m/z): calcd for C<sub>10</sub>H<sub>7</sub>BrF<sub>3</sub>O<sup>-</sup> (M-H)<sup>-</sup>: 278.9638; Found: 278.9640.

**(E)-1,1,1-trifluoro-4-(4-methoxyphenyl)but-3-en-2-ol (13i)**

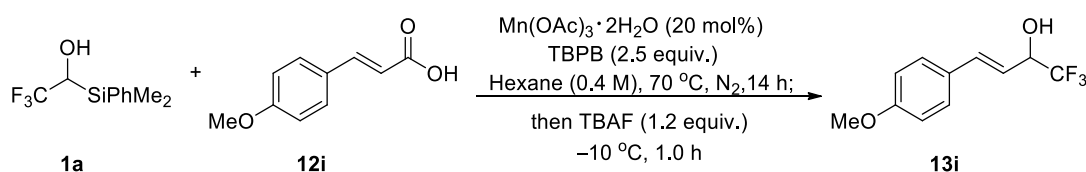

Under N<sub>2</sub> atmosphere, to a dried 10 mL Schlenk tube equipped with a magnetic stir bar containing Mn(OAc)<sub>3</sub>·2H<sub>2</sub>O (21.4 mg, 0.08 mmol, 20 mol%) and **12i** (142.4 mg, 0.8 mmol, 2.0 equiv.) was added hexane (1 mL, 0.4 M), TBPB (194.3 mg, 1.0 mmol, 2.5 equiv.) and **1a** (93.6 mg, 0.4 mmol) sequentially. The tube was sealed, and the resulting mixture was kept stirring at 70 °C in heating block for 14 h. The mixture was then cooled to -10 °C with low temperature bath, TBAF (1.0 M in THF, 0.48 mL, 0.48 mmol, 1.2 equiv.) was added and the resulting mixture was stirred at -10 °C for 1.0 h. The reaction mixture was quenched with water (2 mL), extracted with DCM (3×10 mL) and organic phase was combined and washed with brine, dried over Na<sub>2</sub>SO<sub>4</sub>, concentrated under reduced pressure. The crude product was purified with column chromatography on silica gel (200~300 mesh) and PE/EA (20/1~10/1, v/v) as eluent to afford 50.1 mg of the title compound as a white solid (54% yield).

R<sub>f</sub> = 0.38 (PE/EA = 4/1, v/v). mp: 47 °C–49 °C. NMR Spectroscopy: <sup>1</sup>H NMR (400 MHz, CDCl<sub>3</sub>) δ 7.36 (d, *J* = 8.6 Hz, 2H), 6.88 (d, *J* = 8.6 Hz, 2H), 6.79 (d, *J* = 15.9 Hz, 1H), 6.06 (dd, *J* = 15.9, 6.7 Hz, 1H), 4.63–4.57 (m, 1H), 3.82 (s, 3H), 2.42 (s, 1H); <sup>13</sup>C NMR (100 MHz, CDCl<sub>3</sub>) δ 160.2, 136.1, 128.4, 128.3, 124.5 (d, *J* = 280.8 Hz), 118.5, 114.3, 72.0 (q, *J* = 32.4 Hz, 03), 55.5; <sup>19</sup>F NMR (375 MHz, CDCl<sub>3</sub>) δ -79.0 (d, *J* = 6.0 Hz, 3F). IR (ATR): 3407, 3008, 2960, 2840, 1606, 1513, 1252, 1170, 1126, 1033, 969, 835, 693 cm<sup>-1</sup>. HRMS (ESI, m/z): calcd for C<sub>11</sub>H<sub>12</sub>F<sub>3</sub>O<sub>2</sub><sup>+</sup> (M+H)<sup>+</sup>: 233.0784; Found: 233.0783.

**(E)-1,1,1-trifluoro-4-(4-benzyloxyphenyl)but-3-en-2-ol (13j)**

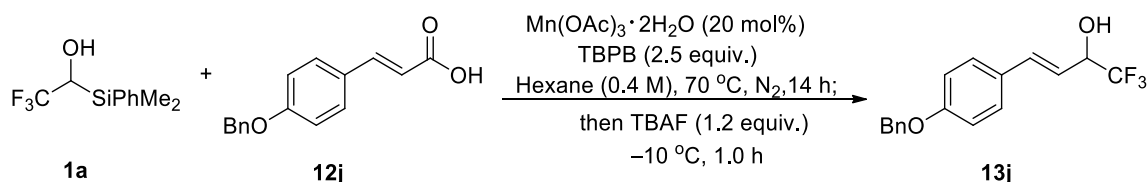

Under N<sub>2</sub> atmosphere, to a dried 10 mL Schlenk tube equipped with a magnetic stir bar containing Mn(OAc)<sub>3</sub>·2H<sub>2</sub>O (21.4 mg, 0.08 mmol, 20 mol%) and **12j** (203.2 mg, 0.8 mmol, 2.0 equiv.) was added hexane (1 mL, 0.4 M), TBPB (194.3 mg, 1.0 mmol, 2.5 equiv.) and **1a** (93.6 mg, 0.4 mmol) sequentially. The tube was sealed, and the resulting mixture was kept stirring at 70 °C in heating block for 14 h. The mixture was then cooled to -10 °C with low temperature bath, TBAF (1.0 M in THF, 0.48 mL, 0.48 mmol, 1.2 equiv.) was added and the resulting mixture was stirred at -10 °C for 1.0 h. The reaction mixture was quenched with water (2 mL), extracted with DCM (3×10 mL) and organic phase was

combined and washed with brine, dried over Na<sub>2</sub>SO<sub>4</sub>, concentrated under reduced pressure. The crude product was purified with column chromatography on silica gel (200~300 mesh) and PE/EA (20/1~10/1, v/v) as eluent to afford 62.9 mg of the title compound as a white solid (51% yield).

R<sub>f</sub> = 0.40 (PE/EA = 4/1, v/v). mp: 89 °C–91 °C. NMR Spectroscopy: <sup>1</sup>H NMR (400 MHz, CDCl<sub>3</sub>) δ 7.45–7.34 (m, 7H), 6.96 (d, *J* = 8.6 Hz, 2H), 6.79 (d, *J* = 15.9 Hz, 1H), 6.07 (dd, *J* = 16.0, 6.9 Hz, 1H), 5.09 (s, 2H), 4.64–4.56 (m, 1H), 2.33 (d, *J* = 5.5 Hz, 1H); <sup>13</sup>C NMR (100 MHz, CDCl<sub>3</sub>) δ 159.4, 136.8, 136.1, 128.8, 128.5, 128.4, 128.2, 127.6, 124.5 (d, *J* = 279.9 Hz), 118.6, 115.2, 71.9 (q, *J* = 32.1 Hz), 70.2; <sup>19</sup>F NMR (375 MHz, CDCl<sub>3</sub>) δ –79.0 (d, *J* = 6.0 Hz, 3F). IR (ATR): 3373, 3037, 2922, 2855, 1610, 1513, 1454, 1264, 1170, 1125, 1036, 977, 738, 697 cm<sup>-1</sup>. HRMS (ESI, m/z): calcd for C<sub>17</sub>H<sub>16</sub>F<sub>3</sub>O<sub>2</sub><sup>+</sup> (M+H)<sup>+</sup>: 309.1097; Found: 309.1089.

**(E)-1,1,1-trifluoro-4-((3-trifluoromethyl)phenyl)but-3-en-2-ol (13k)**

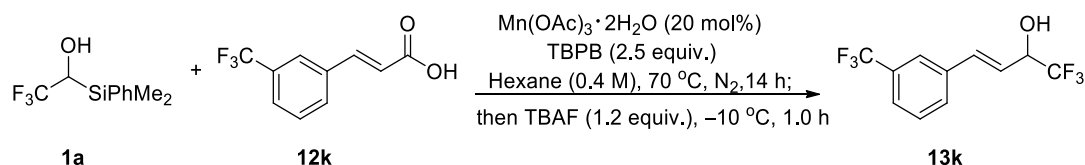

Under N<sub>2</sub> atmosphere, to a dried 10 mL Schlenk tube equipped with a magnetic stir bar containing Mn(OAc)<sub>3</sub>·2H<sub>2</sub>O (21.4 mg, 0.08 mmol, 20 mol%) and **12k** (172.8 mg, 0.8 mmol, 2.0 equiv.) was added hexane (1 mL, 0.4 M), TBPB (194.3 mg, 1.0 mmol, 2.5 equiv.) and **1a** (93.6 mg, 0.4 mmol) sequentially. The tube was sealed, and the resulting mixture was kept stirring at 70 °C in heating block for 14 h. The mixture was then cooled to –10 °C with low temperature bath, TBAF (1.0 M in THF, 0.48 mL, 0.48 mmol, 1.2 equiv.) was added and the resulting mixture was stirred at –10 °C for 1.0 h. The reaction mixture was quenched with water (2 mL), extracted with DCM (3×10 mL) and organic phase was combined and washed with brine, dried over Na<sub>2</sub>SO<sub>4</sub>, concentrated under reduced pressure. The crude product was purified with column chromatography on silica gel (200~300 mesh) and PE/EA (20/1~10/1, v/v) as eluent to afford 70.6 mg of the title compound as a colorless oil (65% yield).

R<sub>f</sub> = 0.46 (PE/EA = 4/1, v/v). NMR Spectroscopy: <sup>1</sup>H NMR (400 MHz, CDCl<sub>3</sub>) δ 7.66–7.46 (m, 4H), 6.92 (d, *J* = 16.2 Hz, 1H), 6.28 (dd, *J* = 16.0, 6.0 Hz, 1H), 4.68 (d, *J* = 5.8 Hz, 1H), 2.48 (d, *J* = 4.9 Hz, 1H); <sup>13</sup>C NMR (150 MHz, CDCl<sub>3</sub>) δ 136.3, 134.7, 131.4 (q, *J* = 32.1 Hz), 130.1, 129.4, 125.4 (q, *J* = 3.7 Hz), 124.3 (q, *J* = 280.4 Hz), 124.1 (q, *J* = 270.8 Hz), 123.7 (q, *J* = 3.8 Hz), 122.7, 71.4 (q, *J* = 32.1 Hz); <sup>19</sup>F NMR (375 MHz, CDCl<sub>3</sub>) δ –62.8 (s, 3F), –78.9 (d, *J* = 6.0 Hz, 3F). IR (ATR): 3370, 3053, 2922, 1331, 1267, 1167, 1122, 1074, 794, 693 cm<sup>-1</sup>. HRMS (ESI, m/z): calcd for C<sub>11</sub>H<sub>7</sub>F<sub>6</sub>O<sup>-</sup> (M–H)<sup>-</sup>: 269.0407; Found: 269.0409.

**(E)-1,1,1-trifluoro-4-((4-trifluoromethyl)phenyl)but-3-en-2-ol (13l)**

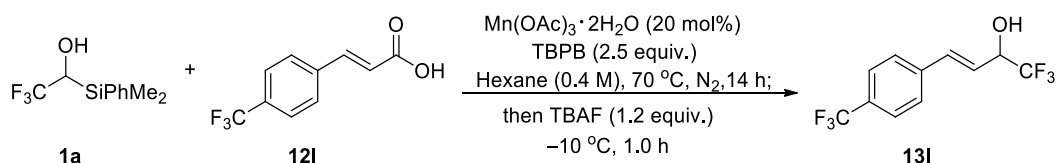

Under N<sub>2</sub> atmosphere, to a dried 10 mL Schlenk tube equipped with a magnetic stir bar containing Mn(OAc)<sub>3</sub>·2H<sub>2</sub>O (21.4 mg, 0.08 mmol, 20 mol%) and **12l** (172.8 mg, 0.8 mmol, 2.0 equiv.) was added hexane (1 mL, 0.4 M), TBPB (194.3 mg, 1.0 mmol, 2.5 equiv.) and **1a** (93.6 mg, 0.4 mmol) sequentially. The tube was sealed, and the resulting mixture was kept stirring at 70 °C in heating block for 14 h. The mixture was then cooled to –10 °C with low temperature bath, TBAF (1.0 M in THF, 0.48 mL, 0.48 mmol, 1.2 equiv.) was added and the resulting mixture was stirred at –10 °C for 1.0 h. The reaction mixture was quenched with water (2 mL), extracted with DCM (3×10 mL) and organic phase was combined and washed with brine, dried over Na<sub>2</sub>SO<sub>4</sub>, concentrated under reduced pressure. The crude product was purified with column chromatography on silica gel (200~300 mesh) and PE/EA (20/1~10/1, v/v) as eluent to afford 77.8 mg of the title compound as a colorless oil (72% yield).

R<sub>f</sub> = 0.43 (PE/EA = 4/1, v/v). NMR Spectroscopy: <sup>1</sup>H NMR (400 MHz, CDCl<sub>3</sub>) δ 7.60 (d, *J* = 7.9 Hz, 2H), 7.51 (d, *J* =

7.6 Hz, 2H), 6.91 (d,  $J = 15.9$  Hz, 1H), 6.30 (dd,  $J = 15.9, 5.8$  Hz, 1H), 4.70–4.67 (m, 1H), 2.66 (bs, 1H);  $^{13}\text{C}$  NMR (100 MHz,  $\text{CDCl}_3$ )  $\delta$  139.0, 134.7, 130.6 (q,  $J = 32.4$  Hz), 127.2, 125.9 (q,  $J = 3.9$  Hz), 124.3 (q,  $J = 280.5$  Hz), 124.2 (q,  $J = 270.7$  Hz), 123.4, 71.4 (q,  $J = 32.4$  Hz);  $^{19}\text{F}$  NMR (375 MHz,  $\text{CDCl}_3$ )  $\delta$  -62.6 (s, 3F), -78.9 (d,  $J = 6.0$  Hz, 3F). IR (ATR): 3377, 2922, 1618, 1416, 1323, 1167, 1122, 969, 835, 697  $\text{cm}^{-1}$ . HRMS (ESI,  $m/z$ ): calcd for  $\text{C}_{11}\text{H}_7\text{F}_6\text{O}^-$  ( $\text{M}-\text{H}$ ) $^-$ : 269.0407; Found: 269.0407.

## Synthesis of $\alpha$ -difluoromethylated alcohols

### 5,5-Difluoro-1-phenyl-4-hydroxy-2-methylenepentan-1-one (14a)

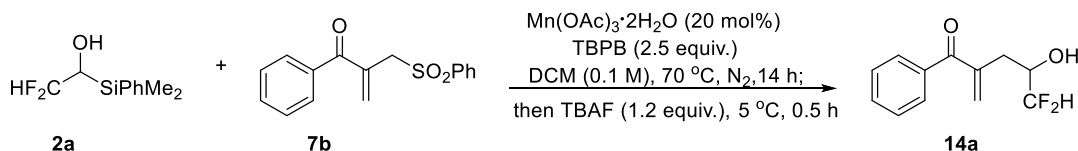

Under  $\text{N}_2$  atmosphere, to a dried 10 mL Schlenk tube equipped with a magnetic stir bar containing  $\text{Mn}(\text{OAc})_3 \cdot 2\text{H}_2\text{O}$  (16.1 mg, 0.06 mmol, 20 mol%) and **7b** (257.4 mg, 0.9 mmol, 3.0 equiv.) was added DCM (3 mL, 0.1 M), **2a** (64.8 mg, 0.3 mmol) and TBPB (145.7 mg, 0.75 mmol, 2.5 equiv.) sequentially. The tube was then sealed, and the resulting mixture was stirred at 70 °C in a heating block for 14 h, after which the mixture was cooled to 5 °C with ice bath. TBAF (1.0 M in THF, 0.36 mL, 0.36 mmol, 1.2 equiv.) was added and the mixture was stirred at 5 °C for 0.5 h. The reaction mixture was quenched with water (2 mL) and extracted with DCM ( $3 \times 10$  mL). The organic phase was combined and washed with brine, dried over  $\text{Na}_2\text{SO}_4$ , concentrated under reduced pressure. The crude product was purified with column chromatography on silica gel (200~300 mesh) and PE/EA (20/1 v/v) as eluent to afford 54.3 mg of the title compound as a colorless oil (80% yield).

$R_f = 0.25$  (PE/EA = 10/1, v/v). NMR Spectroscopy:  $^1\text{H}$  NMR (400 MHz,  $\text{CDCl}_3$ )  $\delta$  7.77 (d,  $J = 7.3$  Hz, 2H), 7.58 (t,  $J = 7.3$  Hz, 1H), 7.45 (t,  $J = 7.6$  Hz, 2H), 6.11 (s, 1H), 5.86–5.58 (m, 2H), 3.98–3.91 (m, 1H), 3.83 (s, 1H), 2.84–2.63 (m, 2H);  $^{13}\text{C}$  NMR (100 MHz,  $\text{CDCl}_3$ )  $\delta$  199.5, 143.1, 137.0, 133.0, 130.9, 130.0, 128.5, 116.1 (t,  $J = 244.2$  Hz), 70.9 (t,  $J = 24.1$  Hz), 33.7;  $^{19}\text{F}$  NMR (375 MHz,  $\text{CDCl}_3$ )  $\delta$  -128.5–-131.2 (m, 2F). IR (ATR): 3452, 3064, 2941, 2292, 2251, 1655, 1446, 1409, 1375, 1330, 1219, 1174, 1140, 1059, 947, 757  $\text{cm}^{-1}$ . HRMS (ESI,  $m/z$ ): calcd for  $\text{C}_{12}\text{H}_{13}\text{F}_2\text{O}_2^+$  ( $\text{M}+\text{H}$ ) $^+$ : 227.0878; Found: 227.0871.

### 5,5-Difluoro-1-(4-fluorophenyl)-4-hydroxy-2-methylenepentan-1-one (14b)

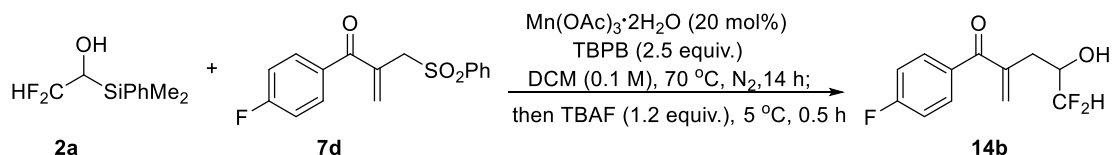

Under  $\text{N}_2$  atmosphere, to a dried 10 mL Schlenk tube equipped with a magnetic stir bar containing  $\text{Mn}(\text{OAc})_3 \cdot 2\text{H}_2\text{O}$  (16.1 mg, 0.06 mmol, 20 mol%) and **7d** (273.6 mg, 0.9 mmol, 3.0 equiv.) was added DCM (3 mL, 0.1 M), **2a** (64.8 mg, 0.3 mmol) and TBPB (145.7 mg, 0.75 mmol, 2.5 equiv.) sequentially. The tube was then sealed, and the resulting mixture was stirred at 70 °C in a heating block for 14 h, after which the mixture was cooled to 5 °C with ice bath. TBAF (1.0 M in THF, 0.36 mL, 0.36 mmol, 1.2 equiv.) was added and the mixture was stirred at 5 °C for 0.5 h. The reaction mixture was quenched with water (2 mL) and extracted with DCM ( $3 \times 10$  mL). The organic phase was combined and washed with brine, dried over  $\text{Na}_2\text{SO}_4$ , concentrated under reduced pressure. The crude product was purified with column chromatography on silica gel (200~300 mesh) and PE/EA (20/1~10/1, v/v) as eluent to afford 48.3 mg of the title compound as a colorless oil (66% yield).

$R_f = 0.32$  (PE/EA = 5/1, v/v). NMR Spectroscopy:  $^1\text{H}$  NMR (400 MHz,  $\text{CDCl}_3$ )  $\delta$  7.86–7.79 (m, 2H), 7.18–7.09 (m, 2H), 6.09 (s, 1H), 5.87–5.56 (m, 2H), 4.02–3.85 (m, 1H), 3.65 (m, 1H), 2.86–2.59 (m, 2H);  $^{13}\text{C}$  NMR (100 MHz,  $\text{CDCl}_3$ )  $\delta$  197.8, 165.8 (d,  $J = 252.3$  Hz), 143.1, 133.2 (d,  $J = 3.2$  Hz), 132.7 (d,  $J = 9.1$  Hz), 130.2, 116.1 (t,  $J = 242.0$  Hz), 115.7 (d,  $J = 21.9$  Hz), 70.9 (t,  $J = 23.7$  Hz), 33.7 (t,  $J = 4.1$  Hz);  $^{19}\text{F}$  NMR (375 MHz,  $\text{CDCl}_3$ )  $\delta$  -104.9 (m, 1F), -126.2–-132.7 (m, 2F). IR (ATR): 3422, 2926, 1648, 1595, 1506, 1413, 1156, 1059, 939, 794  $\text{cm}^{-1}$ . HRMS (ESI,  $m/z$ ): calcd for  $\text{C}_{12}\text{H}_{12}\text{F}_3\text{O}_2^+$  ( $\text{M}+\text{H}$ ) $^+$ : 267.0603; Found: 267.0604.

### 5,5-Difluoro-4-hydroxy-2-methylene-*N,N*-diphenylpentanamide (14c)

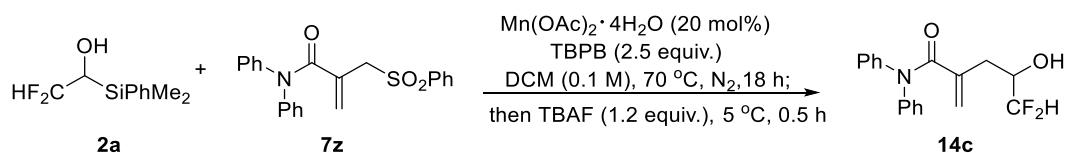

Under  $\text{N}_2$  atmosphere, to a dried 10 mL Schlenk tube equipped with a magnetic stir bar containing  $\text{Mn}(\text{OAc})_2 \cdot 4\text{H}_2\text{O}$  (14.7 mg, 0.06 mmol, 20 mol%), **7z** (339.3 mg, 0.9 mmol, 3.0 equiv.) was added DCM (3 mL, 0.1 M), **2a** (64.8 mg, 0.3 mmol) and TBPB (145.7 mg, 0.75 mmol, 2.5 equiv.) sequentially. The tube was sealed, and the resulting mixture was kept stirring at 70 °C in heating block for 18 h. After which the mixture was cooled to 5 °C with ice bath, TBAF (1.0 M in THF, 0.36 mL, 0.36 mmol, 1.2 equiv.) was added and the mixture was stirred at 5 °C for 0.5 h. The reaction mixture was quenched with water (2 mL), extracted with DCM (3×10 mL) and organic phase was combined and washed with brine, dried over  $\text{Na}_2\text{SO}_4$ , concentrated under reduced pressure. The crude product was purified with column chromatography on silica gel (200~300 mesh) and PE/EA (3/1, v/v) as eluent to afford 68.2 mg of the title compound as a pale yellow oil (72% yield).

$R_f = 0.55$  (PE/EA = 3/1, v/v). NMR Spectroscopy:  $^1\text{H}$  NMR (400 MHz,  $\text{CDCl}_3$ )  $\delta$  7.40–7.33 (m, 4H), 7.29–7.23 (m, 2H), 7.21–7.16 (m, 4H), 5.71 (td,  $J = 56.0, 4.0$  Hz, 1H), 5.40 (s, 1H), 5.29 (s, 1H), 4.01–3.85 (m, 1H), 2.60–2.42 (m, 2H);  $^{13}\text{C}$  NMR (100 MHz,  $\text{CDCl}_3$ )  $\delta$  172.6, 143.3, 139.6, 129.5, 127.3, 125.0, 116.1 (t,  $J = 241.8$  Hz), 71.5 (t,  $J = 24.1$  Hz), 34.7 (t,  $J = 4.3$  Hz);  $^{19}\text{F}$  NMR (375 MHz,  $\text{CDCl}_3$ )  $\delta$  -127.5– -132.3 (m, 2F). IR (ATR): 3366, 2970, 1648, 1588, 1491, 1361, 1252, 1137, 760, 697  $\text{cm}^{-1}$ . HRMS (ESI, m/z): calcd for  $\text{C}_{18}\text{H}_{18}\text{F}_2\text{NO}_2^+$  ( $\text{M}+\text{H}^+$ ): 318.1300; Found: 318.1298.

### (8*R*,9*S*,10*R*,13*S*,14*S*,17*S*)-10,13-Dimethyl-3-oxo-2,3,6,7,8,9,10,11,12,13,14,15,16,17-tetradecahydro-1*H*-cyclopenta[*a*]phenanthren-17-yl 5,5-difluoro-4-hydroxy-2-methylenepentanoate (14d)

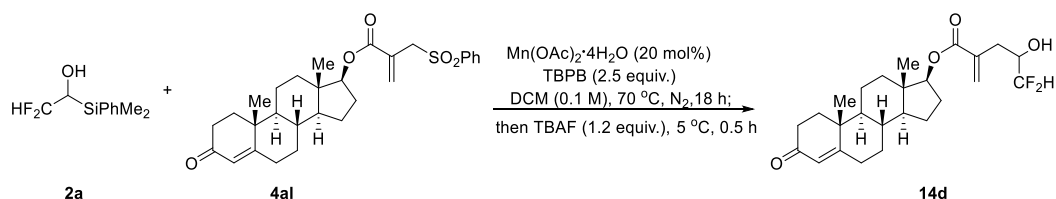

Under  $\text{N}_2$  atmosphere, to a dried 10 mL Schlenk tube equipped with a magnetic stir bar containing with  $\text{Mn}(\text{OAc})_2 \cdot 4\text{H}_2\text{O}$  (14.7 mg, 0.06 mmol, 20 mol%), **7a1** (297.6 mg, 0.6 mmol, 2.0 equiv.) was added DCM (3 mL, 0.1 M), **2a** (70.2 mg, 0.3 mmol) and TBPB (145.7 mg, 0.75 mmol, 2.5 equiv.) sequentially. The tube was sealed, and the resulting mixture was kept stirring at 70 °C in heating block for 18 h. After which the mixture was cooled to 5 °C with ice bath, TBAF (1.0 M in THF, 0.36 mL, 0.36 mmol, 1.2 equiv.) was added and the mixture was stirred at 5 °C for 0.5 h. The reaction mixture was quenched with water (2 mL), extracted with DCM (3×10 mL) and organic phase was combined and washed with brine, dried over  $\text{Na}_2\text{SO}_4$ , concentrated under reduced pressure. The crude product was purified with column chromatography on silica gel (200~300 mesh) and PE/EA (8/1, v/v) as eluent to afford 109.0 mg of the title compound as a white solid (83% yield).

$R_f = 0.37$  (PE/EA = 2/1, v/v). mp: 87.3 °C–88.9 °C. NMR Spectroscopy:  $^1\text{H}$  NMR (400 MHz,  $\text{CDCl}_3$ )  $\delta$  6.31 (s, 1H), 5.86–5.52 (m, 3H), 4.72–4.62 (m, 1H), 3.92 (q,  $J = 12.8, 11.4$  Hz, 1H), 2.70 (dd,  $J = 13.3, 2.9$  Hz, 1H), 2.51 (dd,  $J = 14.2, 8.6$  Hz, 1H), 2.46–2.17 (m, 5H), 2.05–1.98 (m, 1H), 1.90–1.76 (m, 2H), 1.75–1.64 (m, 2H), 1.64–1.52 (m, 3H), 1.47–1.33 (m, 2H), 1.30–1.22 (m, 1H), 1.18 (s, 3H), 1.14–0.90 (m, 3H), 0.88 (s, 3H);  $^{13}\text{C}$  NMR (100 MHz,  $\text{CDCl}_3$ )  $\delta$  199.7, 171.1, 167.8, 136.1, 129.0, 124.1, 116.0 (t,  $J = 241.8$  Hz), 83.7, 70.4 (td,  $J = 23.7, 4.4$  Hz), 53.8, 50.3, 42.9 (d,  $J = 3.0$  Hz), 38.7, 36.8 (d,  $J = 2.8$  Hz), 35.8, 35.5, 34.0, 33.3 (q,  $J = 3.5$  Hz), 32.8, 31.6, 27.6, 23.6, 20.6, 17.5, 12.3;  $^{19}\text{F}$  NMR (375 MHz,  $\text{CDCl}_3$ )  $\delta$  -128.5– -131.6 (m, 2F). IR (ATR): 3422, 2945, 1715, 1435, 1312, 1200, 1156, 1058, 943, 731  $\text{cm}^{-1}$ . HRMS (ESI, m/z): calcd for  $\text{C}_{25}\text{H}_{34}\text{F}_2\text{O}_4\text{Na}^+$  ( $\text{M}+\text{Na}^+$ ): 459.2317; Found: 459.2315.

**(4*S*,5'*R*,6*aR*,6*bS*,8*aS*,8*bR*,9*S*,10*R*,11*aS*,12*aS*,12*bS*)-5',6*a*,8*a*,9-Tetramethyl-1,3,3',4,4',5,5',6,6*a*,6*b*,6',7,8,8*a*,8*b*,9,11*a*,12,12*a*,12*b*-icosahydrospiro[naphtho[2',1':4,5]indeno[2,1-*b*]furan-10,2'-pyran]-4-yl 5,5-difluoro-4-hydroxy-2-methylenepentanoate (14e)**

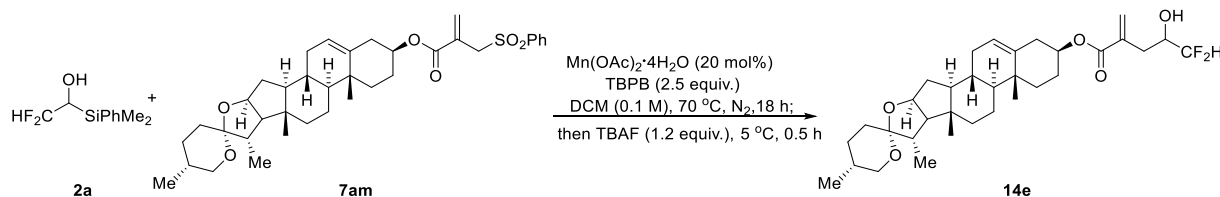

Under N<sub>2</sub> atmosphere, to a dried 10 mL Schlenk tube equipped with a magnetic stir bar containing Mn(OAc)<sub>2</sub>•4H<sub>2</sub>O (14.7 mg, 0.06 mmol, 20 mol%), **7am** (373.5 mg, 0.6 mmol, 2.0 equiv.) was added DCM (3 mL, 0.1 M), **2a** (70.2 mg, 0.3 mmol) and TBPB (145.7 mg, 0.75 mmol, 2.5 equiv.) sequentially. The tube was sealed, and the resulting mixture was kept stirring at 70 °C in heating block for 18 h. After which the mixture was cooled to 5 °C with ice bath, TBAF (1.0 M in THF, 0.36 mL, 0.36 mmol, 1.2 equiv.) was added and the mixture was stirred at 5 °C for 0.5 h. The reaction mixture was quenched with water (2 mL), extracted with DCM (3×10 mL) and organic phase was combined and washed with brine, dried over Na<sub>2</sub>SO<sub>4</sub>, concentrated under reduced pressure. The crude product was purified with column chromatography on silica gel (200~300 mesh) and PE/EA (12/1, v/v) as eluent to afford 112.9 mg of the title compound as a white solid (67 % yield).

R<sub>f</sub> = 0.42 (PE/EA = 5/1, v/v). mp: 126.1 °C–127.4 °C. NMR Spectroscopy: <sup>1</sup>H NMR (400 MHz, CDCl<sub>3</sub>) δ 6.29 (d, *J* = 1.3 Hz, 1H), 5.84–5.52 (m, 2H), 5.39 (d, *J* = 5.1 Hz, 1H), 4.74–4.61 (m, 1H), 4.40 (dd, *J* = 14.3, 8.1 Hz, 1H), 3.98–3.84 (m, 1H), 3.50–3.43 (m, 1H), 3.36 (t, *J* = 10.9 Hz, 1H), 2.69 (dd, *J* = 14.4, 3.3 Hz, 1H), 2.51 (dd, *J* = 14.4, 9.0 Hz, 1H), 2.37 (d, *J* = 7.9 Hz, 2H), 2.06–1.40 (m, 18H), 1.02 (s, 3H), 0.96 (d, *J* = 7.0 Hz, 3H), 0.78 (d, *J* = 4.8 Hz, 6H); <sup>13</sup>C NMR (100 MHz, CDCl<sub>3</sub>) δ 167.4, 139.5, 136.3, 122.8, 116.0 (t, *J* = 244.3 Hz), 109.4, 80.9, 75.3, 70.6 (t, *J* = 23.8 Hz), 67.0, 62.2, 56.6, 41.7, 40.4, 39.8, 38.1, 37.0, 36.9, 33.4 (t, *J* = 4.0 Hz), 32.2, 32.0, 31.5, 28.9, 27.8, 20.9, 19.5, 17.2, 16.4, 14.6; <sup>19</sup>F NMR (375 MHz, CDCl<sub>3</sub>) δ –128.7––131.6 (m, 2F). IR (ATR): 3418, 2945, 1710, 1454, 1375, 1327, 1245, 1051, 980, 83 cm<sup>-1</sup>. HRMS (ESI, *m/z*): calcd for C<sub>33</sub>H<sub>48</sub>F<sub>3</sub>O<sub>5</sub><sup>+</sup> (M+H)<sup>+</sup>: 563.3543; Found: 563.3533.

**3-(3,3-Difluoro-2-hydroxypropyl)-3-methyl-1-phenylindolin-2-one (14f)**

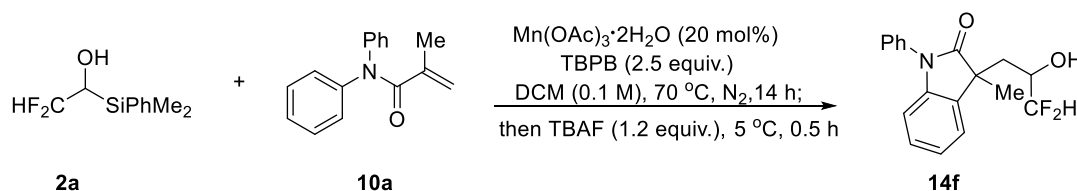

Under N<sub>2</sub> atmosphere, to a dried 10 mL Schlenk tube equipped with a magnetic stir bar containing Mn(OAc)<sub>3</sub>•2H<sub>2</sub>O (16.1 mg, 0.06 mmol, 20 mol%) and **10a** (85.3 mg, 0.36 mmol, 1.2 equiv.) was added DCM (3 mL, 0.1 M), **2a** (64.8 mg, 0.3 mmol) and TBPB (145.7 mg, 0.75 mmol, 2.5 equiv.) sequentially. The tube was then sealed, and the resulting mixture was stirred at 70 °C in a heating block for 14 h, after which the mixture was cooled to 5 °C with ice bath. TBAF (1.0 M in THF, 0.36 mL, 0.36 mmol, 1.2 equiv.) was added and the mixture was stirred at 5 °C for 0.5 h. The reaction mixture was quenched with water (2 mL) and extracted with DCM (3×10 mL). The organic phase was combined and washed with saturated Na<sub>2</sub>CO<sub>3</sub> and brine, dried over Na<sub>2</sub>SO<sub>4</sub>, concentrated under reduced pressure. The crude product was purified with column chromatography on silica gel (200~300 mesh) and PE/EA (20/1~10/1, v/v) as eluent to afford 76.5 mg of the title compound **14f** (81% yield, **14f-a**:**14f-b** = 48:52).

R<sub>f</sub> (**14f-a**) = 0.29 (PE/EA = 5/1, v/v), (37.0 mg, 39% yield, pale yellow oil). NMR Spectroscopy: <sup>1</sup>H NMR (400 MHz, CDCl<sub>3</sub>) δ 7.58–7.52 (m, 2H), 7.47–7.40 (m, 3H), 7.30–7.28 (m, 1H), 7.24 (td, *J* = 7.7, 1.4 Hz, 1H), 7.18–7.14 (m, 1H), 6.86–6.84 (m, 1H), 5.83–5.54 (m, 1H), 4.51 (s, 1H), 4.26–4.16 (m, 1H), 2.29–1.93 (m, 2H), 1.60 (s, 3H); <sup>13</sup>C NMR (100 MHz, CDCl<sub>3</sub>) δ 181.7, 142.4, 134.5, 134.0, 129.8, 128.6, 128.4, 126.6, 123.9, 122.9, 116.1 (dd, *J* = 242.7, 240.6 Hz), 110.1, 68.7 (dd, *J* = 25.0, 23.4 Hz), 46.8, 36.7–36.0 (m), 23.1; <sup>19</sup>F NMR (375 MHz, CDCl<sub>3</sub>) δ –126.5––130.8 (m, 2F). IR (ATR): 3399, 2967, 1707, 1610, 1502, 1379, 1204, 1055, 757, 697 cm<sup>-1</sup>. HRMS (ESI, *m/z*): calcd for C<sub>18</sub>H<sub>17</sub>F<sub>2</sub>NO<sub>2</sub>Na<sup>+</sup> (M+Na)<sup>+</sup>: 340.1120; Found: 340.1116

$R_f$  (**14f-b**) = 0.23 (PE/EA = 5/1, v/v), (39.5 mg, 42% yield, white solid, mp: 136.1 °C–137.4 °C). NMR Spectroscopy:  $^1\text{H}$  NMR (400 MHz,  $\text{CDCl}_3$ )  $\delta$  7.54–7.48 (m, 2H), 7.43–7.38 (m, 3H), 7.25–7.19 (m, 2H), 7.17–7.08 (m, 1H), 6.83 (dt,  $J$  = 7.5, 0.8 Hz, 1H), 5.55 (td,  $J$  = 56.2, 3.9 Hz, 1H), 3.53–3.30 (m, 1H), 2.43–2.13 (m, 2H), 1.53 (s, 3H);  $^{13}\text{C}$  NMR (100 MHz,  $\text{CDCl}_3$ )  $\delta$  180.8, 143.7, 134.8, 132.2, 129.7, 128.3, 128.2, 126.8, 123.2, 123.0, 116.0 (t,  $J$  = 242.5 Hz), 109.8, 69.1 (t,  $J$  = 23.9 Hz), 46.2, 37.8, 25.7;  $^{19}\text{F}$  NMR (375 MHz,  $\text{CDCl}_3$ )  $\delta$  –126.5– –132.5 (m, 2F). IR (ATR): 3399, 2926, 1707, 1454, 1379, 1297, 1208, 1137, 1059, 760  $\text{cm}^{-1}$ . HRMS (ESI, m/z): calcd for  $\text{C}_{18}\text{H}_{18}\text{F}_2\text{NO}_2\text{H}^+$  (M+H) $^+$ : 318.1300; Found: 318.1298.

### 1-Benzyl-3-(3,3-difluoro-2-hydroxypropyl)-3-methylindolin-2-one (**14g**)

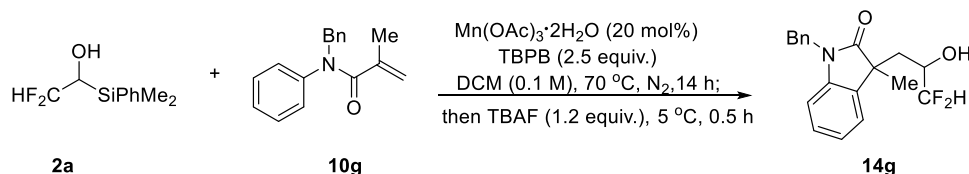

Under  $\text{N}_2$  atmosphere, to a dried 10 mL Schlenk tube equipped with a magnetic stir bar containing  $\text{Mn}(\text{OAc})_3 \cdot 2\text{H}_2\text{O}$  (16.1 mg, 0.06 mmol, 20 mol%) and **10g** (90.4 mg, 0.36 mmol, 1.2 equiv.) was added DCM (3 mL, 0.1 M), **2a** (64.8 mg, 0.3 mmol) and TBPB (145.7 mg, 0.75 mmol, 2.5 equiv.) sequentially. The tube was then sealed, and the resulting mixture was stirred at 70 °C in a heating block for 14 h, after which the mixture was cooled to 5 °C with ice bath. TBAF (1.0 M in THF, 0.36 mL, 0.36 mmol, 1.2 equiv.) was added and the mixture was stirred at 5 °C for 0.5 h. The reaction mixture was quenched with water (2 mL) and extracted with DCM (3×10 mL). The organic phase was combined and washed with saturated  $\text{Na}_2\text{CO}_3$  and brine, dried over  $\text{Na}_2\text{SO}_4$ , concentrated under reduced pressure. The crude product was purified with column chromatography on silica gel (200–300 mesh) and PE/EA (20/1–10/1, v/v) as eluent to afford 77.6 mg of the title compound **14g** (78% yield, **14g-a**:**14g-b** = 50:50).

$R_f$  (**14g-a**) = 0.24 (PE/EA = 5/1, v/v), (39.0 mg, 39% yield, pale yellow oil). NMR Spectroscopy:  $^1\text{H}$  NMR (400 MHz,  $\text{CDCl}_3$ )  $\delta$  7.37–7.26 (m, 5H), 7.23–7.16 (m, 2H), 7.08 (td,  $J$  = 7.5, 1.1 Hz, 1H), 6.78 (dt,  $J$  = 7.8, 0.9 Hz, 1H), 5.86–5.56 (m, 1H), 5.00–4.87 (m, 2H), 4.79 (s, 1H), 4.26–4.17 (m, 1H), 2.22–1.82 (m, 2H), 1.55 (s, 3H);  $^{13}\text{C}$  NMR (100 MHz,  $\text{CDCl}_3$ )  $\delta$  182.4, 141.4, 135.5, 134.8, 129.1, 128.4, 128.0, 127.3, 123.6, 122.7, 116.2 (t,  $J$  = 236.9 Hz), 109.9, 68.9 (t,  $J$  = 24.2 Hz), 46.7, 44.1, 36.1, 22.7;  $^{19}\text{F}$  NMR (375 MHz,  $\text{CDCl}_3$ )  $\delta$  –126.7– –132.9 (m, 2F). IR (ATR): 3358, 2967, 1681, 1491, 1383, 1182, 1055, 943, 805, 753  $\text{cm}^{-1}$ . HRMS (ESI, m/z): calcd for  $\text{C}_{19}\text{H}_{20}\text{F}_2\text{NO}_2^+$  (M+H) $^+$ : 332.1457; Found: 332.1456.

$R_f$  (**14g-b**) = 0.17 (PE/EA = 5/1, v/v). (38.6 mg, 39% yield, white solid, mp: 105.3 °C–106.7 °C). NMR Spectroscopy:  $^1\text{H}$  NMR (400 MHz,  $\text{CDCl}_3$ )  $\delta$  7.35–7.25 (m, 5H), 7.19–7.15 (m, 2H), 7.08–7.02 (m, 1H), 6.80–6.69 (m, 1H), 5.55 (td,  $J$  = 56.2, 3.9 Hz, 1H), 5.01–4.83 (m, 2H), 3.48–3.33 (m, 1H), 2.43–2.13 (m, 2H), 1.46 (s, 3H);  $^{13}\text{C}$  NMR (100 MHz,  $\text{CDCl}_3$ )  $\delta$  181.3, 142.7, 136.1, 132.5, 128.9, 128.3, 127.7, 127.5, 122.8, 122.8, 115.9 (t,  $J$  = 242.3 Hz), 109.7, 68.9 (t,  $J$  = 24.0 Hz), 46.2, 44.1, 37.0, 26.1;  $^{19}\text{F}$  NMR (375 MHz,  $\text{CDCl}_3$ )  $\delta$  –126.7– –132.9 (m, 2F). IR (ATR): 3418, 2926, 1700, 1491, 1383, 1305, 1182, 1059, 932, 752  $\text{cm}^{-1}$ . HRMS (ESI, m/z): calcd for  $\text{C}_{19}\text{H}_{20}\text{F}_2\text{NO}_2^+$  (M+H) $^+$ : 332.1457; Found: 332.1456.

### Methyl 3-(3,3-difluoro-2-hydroxypropyl)-3-methyl-2-oxo-1-phenylindoline-6-carboxylate (**14h**)

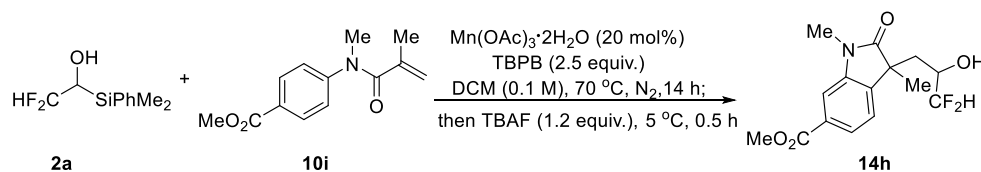

Under  $\text{N}_2$  atmosphere, to a dried 10 mL Schlenk tube equipped with a magnetic stir bar containing  $\text{Mn}(\text{OAc})_3 \cdot 2\text{H}_2\text{O}$  (16.1 mg, 0.06 mmol, 20 mol%) and **10i** (83.4 mg, 0.36 mmol, 1.2 equiv.) was added DCM (3 mL, 0.1 M), **2a** (64.8 mg, 0.3 mmol) and TBPB (145.7 mg, 0.75 mmol, 2.5 equiv.) sequentially. The tube was then sealed, and the resulting mixture was stirred at 70 °C in a heating block for 14 h, after which the mixture was cooled to 5 °C with ice bath. TBAF



(1.0 M in THF, 0.36 mL, 0.36 mmol, 1.2 equiv.) was added and the mixture was stirred at 5 °C for 0.5 h. The reaction mixture was quenched with water (2 mL) and extracted with DCM (3×10 mL). The organic phase was combined and washed with saturated Na<sub>2</sub>CO<sub>3</sub> and brine, dried over Na<sub>2</sub>SO<sub>4</sub>, concentrated under reduced pressure. The crude product was purified with column chromatography on silica gel (200~300 mesh) and PE/EA (20/1~10/1, v/v) as eluent to afford 71.3 mg of the title compound **14h** (76% yield, **14h-a**:**14h-b** = 51:49)

R<sub>f</sub> (**14h-a**) = 0.28 (PE/EA = 2/1, v/v). (36.8 mg, 39% yield, white solid, mp: 107.2–108.9 °C. NMR Spectroscopy: <sup>1</sup>H NMR (400 MHz, CDCl<sub>3</sub>) δ 8.05 (dd, *J* = 8.1, 1.7 Hz, 1H), 7.88 (s, 1H), 6.92 (d, *J* = 8.2 Hz, 1H), 5.81–5.52 (m, 1H), 4.44 (s, 1H), 4.19–4.01 (m, 1H), 3.91 (s, 3H), 3.28 (s, 3H), 2.18–1.80 (m, 2H), 1.49 (s, 3H); <sup>13</sup>C NMR (100 MHz, CDCl<sub>3</sub>) δ 182.4, 166.8, 146.4, 134.8, 131.2, 125.5, 123.9, 116.0 (t, *J* = 240.6 Hz), 108.4, 68.6 (t, *J* = 24.1 Hz), 52.3, 46.5, 36.0, 26.9, 22.6; <sup>19</sup>F NMR (375 MHz, CDCl<sub>3</sub>) δ –124.8– –133.7 (m, 2F). IR (ATR): 3414, 2926, 1703, 1498, 1457, 1286, 1103, 1051, 977, 772 cm<sup>-1</sup>. HRMS (ESI, m/z): calcd for C<sub>15</sub>H<sub>18</sub>F<sub>2</sub>NO<sub>4</sub><sup>+</sup> (M+H)<sup>+</sup>: 314.1198; Found: 314.1198.

R<sub>f</sub> (**14h-b**) = 0.17 (PE/EA = 2/1, v/v). (34.5 mg, 37% yield, white solid, mp: 128.4 °C–129.8 °C). NMR Spectroscopy: <sup>1</sup>H NMR (400 MHz, CDCl<sub>3</sub>) δ 8.05 (dd, *J* = 8.1, 1.7 Hz, 1H), 6.92 (d, *J* = 8.2 Hz, 1H), 5.81–5.52 (m, 1H), 4.43 (s, 1H), 4.21–4.07 (m, 1H), 3.91 (s, 3H), 3.27 (s, 3H), 2.23–1.76 (m, 1H), 1.49 (s, 3H); <sup>13</sup>C NMR (100 MHz, CDCl<sub>3</sub>) δ 181.6, 167.0, 147.8, 132.5, 131.2, 124.7, 124.0, 115.8 (t, *J* = 242.5 Hz), 108.1, 68.8 (t, *J* = 23.8 Hz), 52.2, 45.9, 37.2, 26.7, 25.2; <sup>19</sup>F NMR (375 MHz, CDCl<sub>3</sub>) δ –126.5– –133.0 (m, 2F). IR (ATR): 3422, 2922, 1707, 1498, 1457, 1372, 1286, 1055, 977, 772 cm<sup>-1</sup>. HRMS (ESI, m/z): calcd for C<sub>15</sub>H<sub>18</sub>F<sub>2</sub>NO<sub>4</sub><sup>+</sup> (M+H)<sup>+</sup>: 314.1198; Found: 314.1197.

### 3-(3,3-Difluoro-2-hydroxypropyl)-6-methoxy-1,3-dimethylindolin-2-one (**14i**)

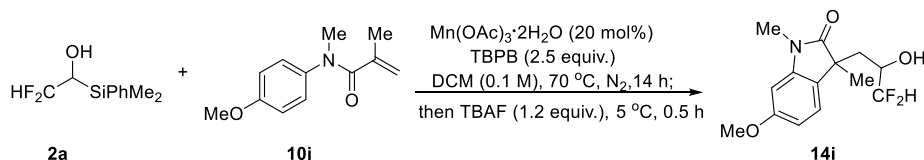

Under N<sub>2</sub> atmosphere, to a dried 10 mL Schlenk tube equipped with a magnetic stir bar containing Mn(OAc)<sub>3</sub>•2H<sub>2</sub>O (16.1 mg, 0.06 mmol, 20 mol%) and **10j** (73.8 mg, 0.36 mmol, 1.2 equiv.) was added DCM (3 mL, 0.1 M), **2a** (64.8 mg, 0.3 mmol) and TBPB (145.7 mg, 0.75 mmol, 2.5 equiv.) sequentially. The tube was then sealed, and the resulting mixture was stirred at 70 °C in a heating block for 14 h, after which the mixture was cooled to 5 °C with ice bath. TBAF (1.0 M in THF, 0.36 mL, 0.36 mmol, 1.2 equiv.) was added and the mixture was stirred at 5 °C for 0.5 h. The reaction mixture was quenched with water (2 mL) and extracted with DCM (3×10 mL). The organic phase was combined and washed with saturated Na<sub>2</sub>CO<sub>3</sub> and brine, dried over Na<sub>2</sub>SO<sub>4</sub>, concentrated under reduced pressure. The crude product was purified with column chromatography on silica gel (200~300 mesh) and PE/EA (20/1~10/1, v/v) as eluent to afford 69.5 mg of the title compound **14i** (82% yield, **14i-a**:**14i-b** = 51:49)

R<sub>f</sub> (**14i-a**) = 0.33 (PE/EA = 2/1, v/v). (35.5 mg, 42% yield, pale yellow oil). NMR Spectroscopy: <sup>1</sup>H NMR (400 MHz, CDCl<sub>3</sub>) δ 6.86–6.73 (m, 3H), 5.86–5.51 (m, 1H), 5.12 (s, 1H), 4.25–4.09 (m, 1H), 3.80 (s, 3H), 3.22 (s, 3H), 2.10–1.76 (m, 2H), 1.46 (s, 3H). <sup>13</sup>C NMR (100 MHz, CDCl<sub>3</sub>) δ 181.9, 156.8, 136.2, 135.6, 116.2 (t, *J* = 239.6 Hz), 112.6, 110.1, 109.2, 68.5 (t, *J* = 24.1 Hz), 56.0, 47.1, 35.9, 26.7, 22.3; <sup>19</sup>F NMR (375 MHz, CDCl<sub>3</sub>) δ –126.3– –133.4 (m, 2F). IR (ATR): 3384, 2920, 1674, 1498, 1435, 1383, 1286, 1047, 873, 741 cm<sup>-1</sup>. HRMS (ESI, m/z): calcd for C<sub>14</sub>H<sub>18</sub>F<sub>2</sub>NO<sub>3</sub><sup>+</sup> (M+H)<sup>+</sup>: 286.1249; Found: 286.1249.

R<sub>f</sub> (**14i-b**) = 0.19 (PE/EA = 2/1, v/v). (34.0 mg, 40% yield, white solid, mp: 134.5 °C–136.1 °C). NMR Spectroscopy: <sup>1</sup>H NMR (400 MHz, CDCl<sub>3</sub>) δ 6.86–6.74 (m, 3H), 5.52 (td, *J* = 56.2, 3.8 Hz, 1H), 3.81 (s, 3H), 3.43–3.31 (m, 1H), 3.18 (s, 3H), 2.30–2.04 (m, 2H), 1.40 (s, 3H); <sup>13</sup>C NMR (100 MHz, CDCl<sub>3</sub>) δ 180.9, 156.3, 137.1, 134.0, 115.9 (t, *J* = 242.2 Hz), 112.3, 110.5, 108.9, 68.9 (t, *J* = 23.8 Hz), 56.0, 46.6, 37.3, 26.6, 25.5; <sup>19</sup>F NMR (375 MHz, CDCl<sub>3</sub>) δ –127.7– –132.3 (m, 2F). IR (ATR): 3392, 2930, 1685, 1498, 1290, 1238, 1126, 1036, 883, 701 cm<sup>-1</sup>. HRMS (ESI, m/z): calcd for C<sub>14</sub>H<sub>18</sub>F<sub>2</sub>NO<sub>3</sub><sup>+</sup> (M+H)<sup>+</sup>: 286.1249; Found: 286.1249.

**(E)-4-(2,6-Difluorophenyl)-1,1-difluorobut-3-en-2-ol (14j)**

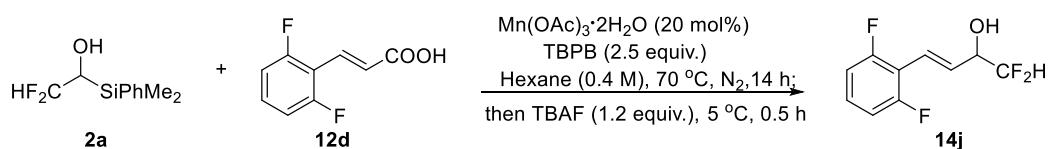

Under  $\text{N}_2$  atmosphere, to a dried 10 mL Schlenk tube equipped with a magnetic stir bar containing  $\text{Mn}(\text{OAc})_3 \cdot 2\text{H}_2\text{O}$  (16.1 mg, 0.06 mmol, 20 mol%) and **12d** (110.4 mg, 0.6 mmol, 2.0 equiv.) was added Hexane (0.75 mL, 0.4 M), **2a** (64.8 mg, 0.3 mmol) and TBPB (145.7 mg, 0.75 mmol, 2.5 equiv.) sequentially. The tube was sealed, and the resulting mixture was stirred at 70 °C in a heating block for 14 h, after which the mixture was cooled to 5 °C with ice bath. TBAF (1.0 M in THF, 0.36 mL, 0.36 mmol, 1.2 equiv.) was added and the mixture was stirred at 5 °C for 0.5 h. The reaction mixture was quenched with water (2 mL) and extracted with DCM (3×10 mL). The organic phase was combined and washed with saturated  $\text{Na}_2\text{CO}_3$  and brine, dried over  $\text{Na}_2\text{SO}_4$ , concentrated under reduced pressure. The crude product was purified with column chromatography on silica gel (200~300 mesh) and PE/EA (20/1~10/1, v/v) as eluent to afford 39.6 mg of the title compound as a pale yellow oil (60% yield).

$R_f = 0.40$  (PE/EA = 5/1, v/v). NMR Spectroscopy:  $^1\text{H}$  NMR (400 MHz,  $\text{CDCl}_3$ )  $\delta$  7.24–7.16 (m, 1H), 6.94–6.84 (m, 3H), 6.59–6.53 (m, 1H), 5.89–5.59 (m, 1H), 4.48 (dq,  $J = 10.3, 5.2$  Hz, 1H), 2.23 (s, 1H);  $^{13}\text{C}$  NMR (150 MHz,  $\text{CDCl}_3$ )  $\delta$  161.2 (dd,  $J = 250.3, 7.3$  Hz), 129.7–129.4 (m), 129.2 (t,  $J = 10.8$  Hz), 121.2, 115.5 (t,  $J = 243.8$  Hz), 113.4 (t,  $J = 15.1$  Hz), 111.7 (dd,  $J = 21.5, 4.8$  Hz), 72.8 (t,  $J = 24.4$  Hz);  $^{19}\text{F}$  NMR (375 MHz,  $\text{CDCl}_3$ )  $\delta$  -112.7 (s, 2F), -126.3– -130.0 (m, 2F). IR (ATR): 3396, 2926, 1621, 1584, 1464, 1267, 1118, 1062, 999, 909  $\text{cm}^{-1}$ . HRMS (ESI, m/z): calcd for  $\text{C}_{10}\text{H}_8\text{F}_4\text{ONa}^+$  (M+Na) $^+$ : 243.0404; Found: 243.0412.

**5,5-Difluoro-1-(4-fluorophenyl)-4-hydroxy-2-methylenepentan-1-one (14k)**

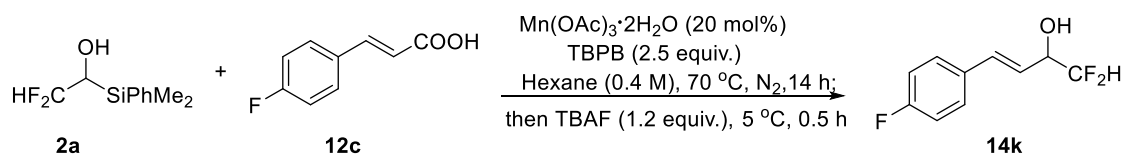

Under  $\text{N}_2$  atmosphere, to a dried 10 mL Schlenk tube equipped with a magnetic stir bar containing  $\text{Mn}(\text{OAc})_3 \cdot 2\text{H}_2\text{O}$  (16.1 mg, 0.06 mmol, 20 mol%) and **12c** (99.6 mg, 0.6 mmol, 2.0 equiv.) was added Hexane (0.75 mL, 0.4 M), **2a** (64.8 mg, 0.3 mmol) and TBPB (145.7 mg, 0.75 mmol, 2.5 equiv.) sequentially. The tube was sealed, and the resulting mixture was stirred at 70 °C in a heating block for 14 h, after which the mixture was cooled to 5 °C with ice bath. TBAF (1.0 M in THF, 0.36 mL, 0.36 mmol, 1.2 equiv.) was added and the mixture was stirred at 5 °C for 0.5 h. The reaction mixture was quenched with water (2 mL) and extracted with DCM (3×10 mL). The organic phase was combined and washed with saturated  $\text{Na}_2\text{CO}_3$  and brine, dried over  $\text{Na}_2\text{SO}_4$ , concentrated under reduced pressure. The crude product was purified with column chromatography on silica gel (200~300 mesh) and PE/EA (20/1~10/1, v/v) as eluent to afford 35.4 mg of the title compound as a colorless oil (58% yield).

$R_f = 0.32$  (PE/EA = 5/1, v/v). NMR Spectroscopy:  $^1\text{H}$  NMR (400 MHz,  $\text{CDCl}_3$ )  $\delta$  7.42–7.35 (m, 2H), 7.08–6.98 (m, 2H), 6.78 (dd,  $J = 16.0, 1.4$  Hz, 1H), 6.16–6.10 (m, 1H), 5.88–5.56 (m, 1H), 4.49–4.20 (m, 1H), 2.29 (s, 1H);  $^{13}\text{C}$  NMR (100 MHz,  $\text{CDCl}_3$ )  $\delta$  162.9 (d,  $J = 245.5$  Hz), 133.8, 132.1 (d,  $J = 3.2$  Hz), 128.5 (d,  $J = 8.0$  Hz), 122.4, 115.8 (d,  $J = 21.5$  Hz), 115.6 (t,  $J = 242.3$  Hz), 72.3 (t,  $J = 24.4$  Hz);  $^{19}\text{F}$  NMR (375 MHz,  $\text{CDCl}_3$ )  $\delta$  -113.0 (td,  $J = 9.9, 4.9$  Hz, 1F), -126.5– -133.0 (m, 2F). IR (ATR): 3411, 2971, 1703, 1603, 1510, 1230, 1051, 969, 854, 746  $\text{cm}^{-1}$ . HRMS (ESI, m/z): calcd for  $\text{C}_{10}\text{H}_{10}\text{F}_3\text{O}^+$  (M+H) $^+$ : 203.0678; Found: 203.0686.

**(E)-1,1-Difluoro-4-(4-methoxyphenyl)but-3-en-2-ol (14l)**

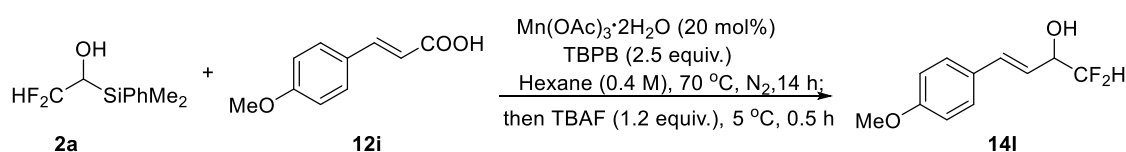

Under  $\text{N}_2$  atmosphere, to a dried 10 mL Schlenk tube equipped with a magnetic stir bar containing  $\text{Mn}(\text{OAc})_3 \cdot 2\text{H}_2\text{O}$  (16.1 mg, 0.06 mmol, 20 mol%) and **12i** (106.8 mg, 0.6 mmol, 2.0 equiv.) was added Hexane (0.75 mL, 0.4 M), **2a** (64.8

mg, 0.3 mmol) and TBPB (145.7 mg, 0.75 mmol, 2.5 equiv.) sequentially. The tube was then sealed, and the resulting mixture was stirred at 70 °C in a heating block for 14 h, after which the mixture was cooled to 5 °C with ice bath. TBAF (1.0 M in THF, 0.36 mL, 0.36 mmol, 1.2 equiv.) was added and the mixture was stirred at 5 °C for 0.5 h. The reaction mixture was quenched with water (2 mL) and extracted with DCM (3×10 mL). The organic phase was combined and washed with saturated Na<sub>2</sub>CO<sub>3</sub> and brine, dried over Na<sub>2</sub>SO<sub>4</sub>, concentrated under reduced pressure. The crude product was purified with column chromatography on silica gel (200~300 mesh) and PE/EA (20/1~10/1, v/v) as eluent to afford 34.7 mg of the title compound as a pale yellow solid (54% yield).

R<sub>f</sub> = 0.31 (PE/EA = 5/1, v/v). mp: 51.3°C–52.8 °C. NMR Spectroscopy: <sup>1</sup>H NMR (400 MHz, CDCl<sub>3</sub>) δ 7.39–7.29 (m, 1H), 6.93–6.83 (m, 2H), 6.74 (dd, *J* = 15.9, 1.4 Hz, 1H), 6.08–6.02 (m, Hz, 1H), 5.71 (td, *J* = 56.1, 4.1 Hz, 1H), 4.49–4.37 (m, 1H), 2.29 (d, *J* = 4.7 Hz, 1H); <sup>13</sup>C NMR (100 MHz, CDCl<sub>3</sub>) δ 160.0, 134.7, 128.7, 128.2, 120.3 (t, *J* = 4.1 Hz), 115.7 (t, *J* = 242.7 Hz), 114.2, 72.5 (t, *J* = 24.3 Hz), 55.4; <sup>19</sup>F NMR (375 MHz, CDCl<sub>3</sub>) δ –119.5– –135.0 (m, 2F). IR (ATR): 3273, 2956, 1603, 1510, 1469, 1297, 1254, 1144, 809, 701 cm<sup>-1</sup>. HRMS (ESI, m/z): calcd for C<sub>11</sub>H<sub>13</sub>F<sub>2</sub>O<sub>2</sub><sup>+</sup> (M+H)<sup>+</sup>: 215.0878; Found: 215.0870.

### Application of radical C-Si bond activation in the synthesis of antitumor agent **Z** and its difluoro analog **Z'**.

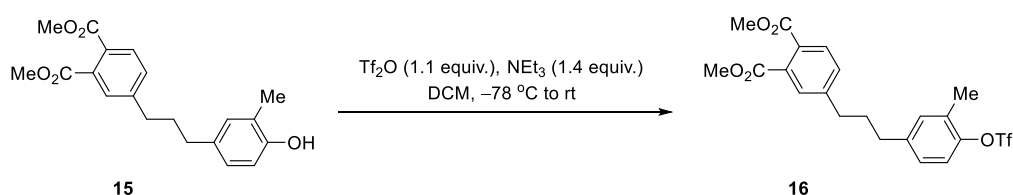

Under N<sub>2</sub> atmosphere, to a solution of **15** (2.3 g, 6.8 mmol) and NEt<sub>3</sub> (1.4 mL, 9.5 mmol, 1.4 equiv.) in DCM (35 mL) at -78 °C was added Tf<sub>2</sub>O (1.3 mL, 7.5 mmol, 1.1 equiv.) slowly in 15 min, the reaction medium was brought to room temperature and stirred for another 2 h, upon completion, a sodium bicarbonate solution was added to quench the reaction, the resulting mixture was extracted with EA (50 mL×3 times), the combined organic phase was dried over Na<sub>2</sub>SO<sub>4</sub>, and concentrated under reduced pressure, the residue was purified by chromatography on a silica column with PE/EA (4/1, v/v) as an eluent. A colorless oil **16** is obtained (3.1 g, 6.6 mmol, 97% yield).

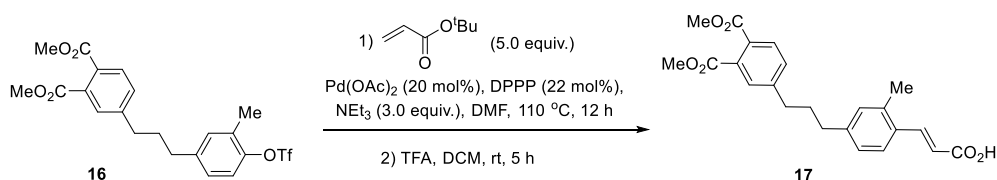

Under N<sub>2</sub> atmosphere, to a stirring solution of **16** (3.03 g, 6.4 mmol), Pd(OAc)<sub>2</sub> (144.0 mg, 0.64 mmol, 10 mol%), dppp (287.9 mg, 0.704 mmol, 11 mol%) and DMF (10 mL) was added NEt<sub>3</sub> (2.9 mL, 19.2 mmol, 3.0 equiv.) and tertbutyl acrylate (4.1 g, 32.0 mmol, 5.0 equiv.). The resulting mixture was stirred at 110 °C for 15 h, quenched by addition of water, extracted with EA (50 mL×3 times), the combined organic phase was dried over Na<sub>2</sub>SO<sub>4</sub>, and concentrated under reduced pressure, the residue was through a silica plug and used for next step without further purification. To the solution of tertbutyl substituted acrylate in DCM (6 mL) was added TFA (30 mL) slowly, the resulting mixture was open to air and stirred for 12 h. The solvent and excess TFA were removed under reduced pressure, the residue was extracted with EA, the combined organic phase was dried over Na<sub>2</sub>SO<sub>4</sub>, and concentrated under reduced pressure, the residue was purified by chromatography on a silica column with DCM/MeOH (10/1, v/v) as an eluent. A pale solid **17** is obtained (1.9 g, 76% yield for two steps).

R<sub>f</sub> = 0.5 (DCM/MeOH = 10/1, v/v). mp: 80 °C–82 °C. <sup>1</sup>H NMR (600 MHz, DMSO-*d*<sub>6</sub> (treated with anhydrous Na<sub>2</sub>SO<sub>4</sub>)) δ 7.78 (d, *J* = 15.8 Hz, 1H), 7.66 (d, *J* = 7.8 Hz, 1H), 7.58 (d, *J* = 7.8 Hz, 1H), 7.53–7.44 (m, 2H), 7.04 (d, *J* = 9.7 Hz, 2H), 6.36 (d, *J* = 15.9 Hz, 1H), 3.79 (s, 3H), 3.79 (s, 3H), 2.66 (t, *J* = 7.7 Hz, 2H), 2.54 (t, *J* = 6.9 Hz, 2H), 2.32 (s, 3H), 1.86 (p, *J* = 7.8 Hz, 2H); <sup>13</sup>C NMR (150 MHz, DMSO-*d*<sub>6</sub>) δ 167.9, 167.9, 167.3, 146.5, 144.1, 141.3, 137.4, 132.3, 131.4, 130.9, 130.6, 129.2, 128.6, 128.5, 126.7, 126.6, 119.2, 52.7, 52.7, 34.6, 34.5, 31.9, 19.4. IR (ATR): 2997, 2941, 2855, 2699, 2594, 1715, 1685, 1607, 1498, 1424, 1282, 1197, 1126, 1073, 936, 824, 689 cm<sup>-1</sup>. HRMS (ESI, m/z): calcd for C<sub>23</sub>H<sub>25</sub>O<sub>6</sub><sup>+</sup> (M+H)<sup>+</sup>: 397.1646; Found: 397.1635.

**(E)-dimethyl 4-(3-(3-methyl-4-(4,4-trifluoro-3-hydroxybut-1-en-1-yl)phenyl)propyl)phthalate (18)**

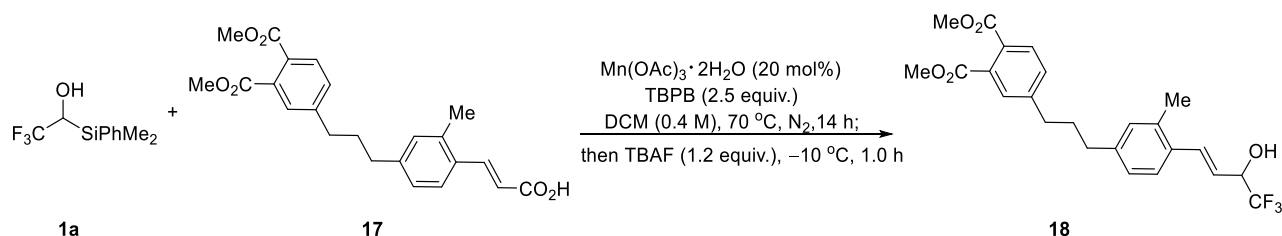

Under  $\text{N}_2$  atmosphere, to a dried 10 mL Schlenk tube equipped with a magnetic stir bar containing  $\text{Mn}(\text{OAc})_3 \cdot 2\text{H}_2\text{O}$  (5.3 mg, 0.02 mmol, 20 mol%) and **17** (79.2 mg, 0.2 mmol, 2.0 equiv.) was added DCM (0.5 mL, 0.2 M), TBPB (48.5 mg, 0.25 mmol, 2.5 equiv.) and **3a** (23.4 mg, 0.1 mmol) sequentially. The tube was sealed, and the resulting mixture was kept stirring at 70 °C in heating block for 14 h. The mixture was then cooled to -10 °C with low temperature bath, TBAF (1.0 M in THF, 0.12 mL, 0.12 mmol, 1.2 equiv.) was added and the resulting mixture was stirred at -10 °C for 1.0 h. The reaction mixture was quenched with water (2 mL), extracted with DCM (3×10 mL) and organic phase was combined and washed with brine, dried over  $\text{Na}_2\text{SO}_4$ , concentrated under reduced pressure. The crude product was purified with column chromatography on silica gel (200~300 mesh) and PE/EA (20/1~10/1, v/v) as eluent to afford 27.0 mg of the title compound as a colorless oil (71% yield). The reaction conducted on 0.4 mmol scale afford 123.0 mg of the title compound (68% yield).

$R_f = 0.43$  (PE/EA = 2/1, v/v). NMR Spectroscopy:  $^1\text{H}$  NMR (400 MHz,  $\text{CDCl}_3$ )  $\delta$  7.68 (d,  $J = 7.9$  Hz, 1H), 7.48 (s, 1H), 7.38 (d,  $J = 7.9$  Hz, 1H), 7.33 (d,  $J = 7.6$  Hz, 1H), 7.07–6.96 (m, 3H), 6.06 (dd,  $J = 15.7, 6.6$  Hz, 1H), 4.65–4.62 (m, 1H), 3.90 (s, 3H), 3.89 (s, 3H), 2.69 (t,  $J = 7.5$  Hz, 2H), 2.60 (t,  $J = 7.5$  Hz, 2H), 2.34 (s, 3H), 1.99–1.91 (m, 2H);  $^{13}\text{C}$  NMR (100 MHz,  $\text{CDCl}_3$ )  $\delta$  168.7, 168.0, 146.4, 142.4, 136.1, 134.1, 132.7, 132.5, 131.0, 130.7, 129.4, 129.0, 128.8, 126.5, 126.2, 124.5 (q,  $J = 280.6$  Hz), 121.6, 71.9 (q,  $J = 32.1$  Hz), 52.8, 52.7, 35.2, 35.1, 32.4, 19.8;  $^{19}\text{F}$  NMR (375 MHz,  $\text{CDCl}_3$ )  $\delta$  -79.0 (d,  $J = 8.9$  Hz, 3F). IR (ATR): 3448, 3004, 2952, 2863, 1722, 1610, 1498, 1435, 1286, 1167, 1126, 969, 790, 738  $\text{cm}^{-1}$ . HRMS (ESI, m/z): calcd for  $\text{C}_{24}\text{H}_{26}\text{F}_3\text{O}_5^+$  ( $\text{M}+\text{H}$ ) $^+$ : 451.1727; Found: 451.1712.

**(E)-dimethyl 4-(3-(3-methyl-4-(4,4-difluoro-3-hydroxybut-1-en-1-yl)phenyl)propyl)phthalate (19)**

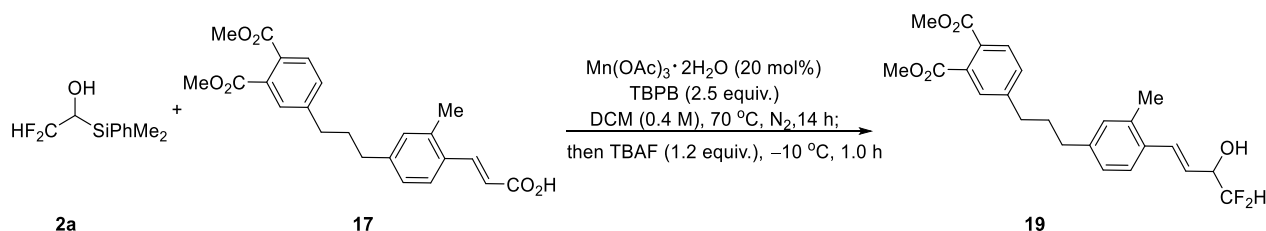

Under  $\text{N}_2$  atmosphere, to a dried 10 mL Schlenk tube equipped with a magnetic stir bar containing  $\text{Mn}(\text{OAc})_3 \cdot 2\text{H}_2\text{O}$  (10.6 mg, 0.04 mmol, 20 mol%) and **17** (158.4 mg, 0.4 mmol, 2.0 equiv.) was added DCM (1.0 mL, 0.2 M), TBPB (97.0 mg, 0.50 mmol, 2.5 equiv.) and **2a** (43.2 mg, 0.2 mmol) sequentially. The tube was sealed, and the resulting mixture was kept stirring at 70 °C in heating block for 14 h. The mixture was then cooled to -10 °C with low temperature bath, TBAF (1.0 M in THF, 0.24 mL, 0.24 mmol, 1.2 equiv.) was added and the resulting mixture was stirred at -10 °C for 1.0 h. The reaction mixture was quenched with water (2 mL), extracted with DCM (3×10 mL) and organic phase was combined and washed with brine, dried over  $\text{Na}_2\text{SO}_4$ , concentrated under reduced pressure. The crude product was purified with column chromatography on silica gel (200~300 mesh) and PE/EA (20/1~10/1, v/v) as eluent to afford 59.2 mg of the title compound as a colorless oil (69% yield).

$R_f = 0.43$  (PE/EA = 2/1, v/v). NMR Spectroscopy:  $^1\text{H}$  NMR (400 MHz,  $\text{CDCl}_3$ )  $\delta$  7.68 (d,  $J = 7.6$  Hz, 1H), 7.48 (s, 1H), 7.39–7.32 (m, 2H), 7.01–6.96 (m, 3H), 6.07 (dd,  $J = 15.7, 6.3$  Hz, 1H), 5.72 (td,  $J = 56.1, 3.9$  Hz, 1H), 4.47–4.45 (m, 1H), 3.90 (s, 3H), 3.89 (s, 3H), 2.69 (t,  $J = 7.5$  Hz, 2H), 2.60 (t,  $J = 7.3$  Hz, 2H), 2.33 (s, 3H), 1.99–1.91 (m, 2H);  $^{13}\text{C}$  NMR (150 MHz,  $\text{CDCl}_3$ )  $\delta$  168.7, 168.0, 146.4, 142.0, 136.0, 132.8, 132.7, 132.6, 131.0, 130.7, 129.4, 129.0, 128.8, 126.4, 126.0, 123.4 (t,  $J = 4.0$  Hz), 115.7 (t,  $J = 243.6$  Hz), 72.5 (t,  $J = 24.2$  Hz), 52.8, 52.7, 35.2, 35.0, 32.4, 19.8;  $^{19}\text{F}$  NMR (375 MHz,  $\text{CDCl}_3$ )  $\delta$  -125.9–-131.7 (m, 2F). IR (ATR): 3459, 2948, 1722, 1607, 1435, 1286, 1126, 1070, 969, 734  $\text{cm}^{-1}$ . HRMS (ESI, m/z): calcd for  $\text{C}_{24}\text{H}_{26}\text{F}_2\text{O}_5\text{Na}^+$  ( $\text{M}+\text{Na}$ ) $^+$ : 455.1641; Found: 455.1625.

**(E)-4-(3-(3-methyl-4-(4,4,4-trifluoro-3-hydroxybut-1-en-1-yl)phenyl)propyl)-1,2-phenylene)dimethanol (antitumor agent Z)**

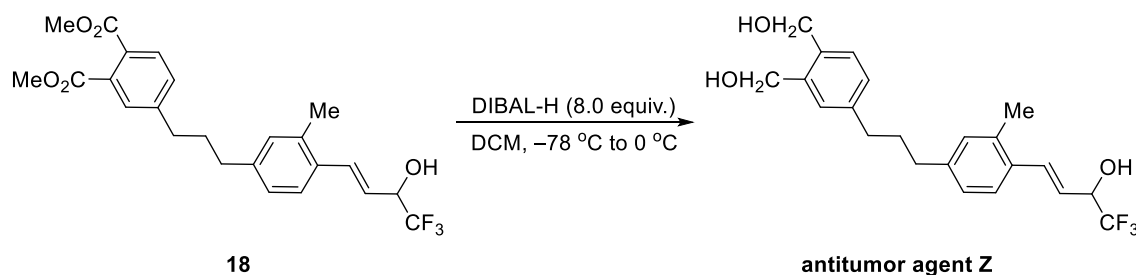

Under N<sub>2</sub> atmosphere, to a dried 10 mL round bottom flask equipped with a magnetic stir bar containing **18** (58.5 mg, 0.13 mmol) and DCM (1.5 mL) was added DIBAL-H (1.0 mL, 1.0 M in hexane, 1.0 mmol, 8.0 equiv.) slowly in 10 min, the reaction medium was brought to 0 °C gradually. The reaction was quenched with 1.0 M HCl, then the resulting mixture was extracted with EA, and organic phase was combined and washed with brine, dried over Na<sub>2</sub>SO<sub>4</sub>, concentrated under reduced pressure. The crude product was purified with column chromatography on silica gel (200~300 mesh) and PE/EA (1/2, v/v) as eluent to afford 48.1 mg of the title compound as a white solid (94% yield).

R<sub>f</sub> = 0.22 (PE/EA = 1/1, v/v). mp: 79 °C–81 °C. NMR Spectroscopy: <sup>1</sup>H NMR (400 MHz, CDCl<sub>3</sub>) δ 7.57 (d, *J* = 7.6 Hz, 1H), 7.45 (d, *J* = 9.2 Hz, 1H), 7.36–7.32 (m, 2H), 7.22–7.18 (m, 3H), 6.25 (dd, *J* = 15.9, 6.7 Hz, 1H), 4.90 (s, 4H), 4.82 (s, 1H), 3.28 (s, 2H), 3.10 (s, 1H), 2.86–2.79 (m, 4H), 2.53 (s, 3H), 2.17–2.10 (m, 2H); <sup>13</sup>C NMR (150 MHz, CDCl<sub>3</sub>) 143.0, 142.8, 139.5, 136.9, 136.1, 134.1, 132.3, 130.7, 130.2, 130.1, 128.6, 126.5, 126.1, 124.5 (q, *J* = 280.1 Hz), 121.5, 71.9 (q, *J* = 31.9 Hz), 64.5, 64.2, 35.2, 35.2, 32.8, 19.9; <sup>19</sup>F NMR (375 MHz, CDCl<sub>3</sub>) –78.9 (d, *J* = 8.9 Hz, 3F). IR (ATR): 3340, 2922, 2855, 1610, 1454, 1267, 1170, 1126, 1010, 969, 831, 734 cm<sup>-1</sup>. HRMS (ESI, *m/z*): calcd for C<sub>24</sub>H<sub>25</sub>F<sub>3</sub>O<sub>3</sub>Na<sup>+</sup> (*M*+Na)<sup>+</sup>: 417.1648; Found: 455.1636.

**(E)-4-(3-(4-(4,4-difluoro-3-hydroxybut-1-en-1-yl)-3-methylphenyl)propyl)-1,2-phenylene)dimethanol (difluoro analog Z' of antitumor agent Z)**

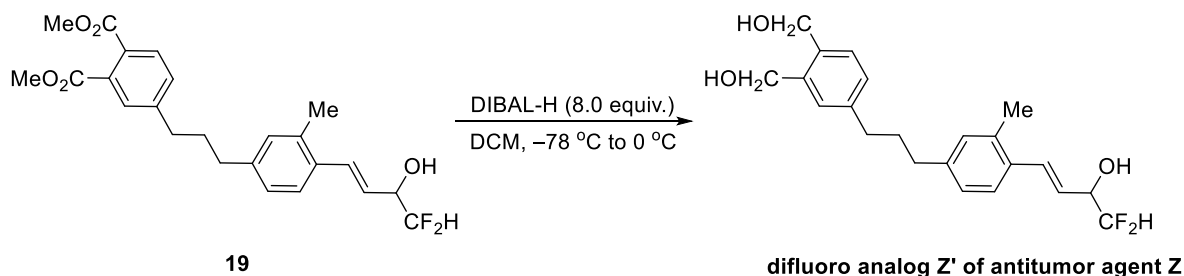

Under N<sub>2</sub> atmosphere, to a dried 10 mL round bottom flask equipped with a magnetic stir bar containing **19** (43.2 mg, 0.1 mmol) and DCM (1.5 mL) was added DIBAL-H (0.8 mL, 1.0 M in hexane, 0.8 mmol, 8.0 equiv.) slowly in 10 min, the reaction medium was brought to 0 °C gradually. The reaction was quenched with 1.0 M HCl, then the resulting mixture was extracted with EA, and organic phase was combined and washed with brine, dried over Na<sub>2</sub>SO<sub>4</sub>, concentrated under reduced pressure. The crude product was purified with column chromatography on silica gel (200~300 mesh) and PE/EA (1/2, v/v) as eluent to afford 33.5 mg of the title compound as a white solid (89% yield).

R<sub>f</sub> = 0.33 (PE/EA = 1/2, v/v). mp: 79 °C–80 °C. NMR Spectroscopy: <sup>1</sup>H NMR (600 MHz, CDCl<sub>3</sub>) δ 7.38 (d, *J* = 7.8 Hz, 1H), 7.27–7.24 (m, 2H), 7.17 (s, 1H), 7.13 (d, *J* = 7.5 Hz, 1H), 7.03–6.93 (m, 3H), 6.06 (dd, *J* = 15.9, 6.4 Hz, 1H), 5.71 (td, *J* = 56.1, 4.2 Hz, 1H), 4.71 (s, 4H), 4.51–4.40 (m, 1H), 2.64 (t, 2H), 2.60 (t, *J* = 7.7 Hz, 2H), 2.45 (bs, 3H), 2.33 (s, 3H), 1.97–1.88 (m, 2H); <sup>13</sup>C NMR (150 MHz, CDCl<sub>3</sub>) 143.0, 142.5, 139.6, 136.9, 135.9, 132.7, 132.7, 130.7, 130.1, 130.0, 128.6, 126.5, 126.0, 123.3 (t, *J* = 3.9 Hz), 115.7 (t, *J* = 243.7 Hz), 72.6 (t, *J* = 24.3 Hz), 64.6, 64.2, 35.2, 35.2, 32.8, 19.9; <sup>19</sup>F NMR (375 MHz, CDCl<sub>3</sub>) –127.3––129.6 (m, 2F). IR (ATR): 3355, 3213, 2922, 2855, 1614, 1461, 1372, 1129, 1066, 999, 831 cm<sup>-1</sup>. HRMS (ESI, *m/z*): calcd for C<sub>24</sub>H<sub>26</sub>F<sub>2</sub>O<sub>3</sub>Na<sup>+</sup> (*M*+Na)<sup>+</sup>: 399.1742; Found: 399.1730.

# NMR spectra for new compounds

$^1\text{H}$  NMR of **5** ( $\text{CDCl}_3$ , 400 MHz, 25 °C)

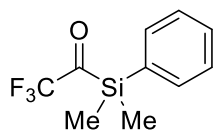

0.645

7.567  
7.550  
7.491  
7.473  
7.455  
7.438  
7.421  
7.403  
7.261

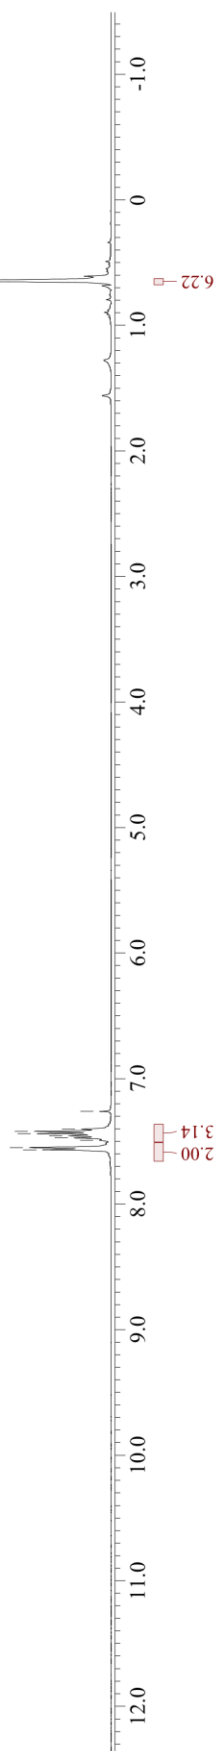

$^{13}\text{C}$  NMR of **5** ( $\text{CDCl}_3$ , 100 MHz, 25 °C)

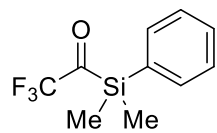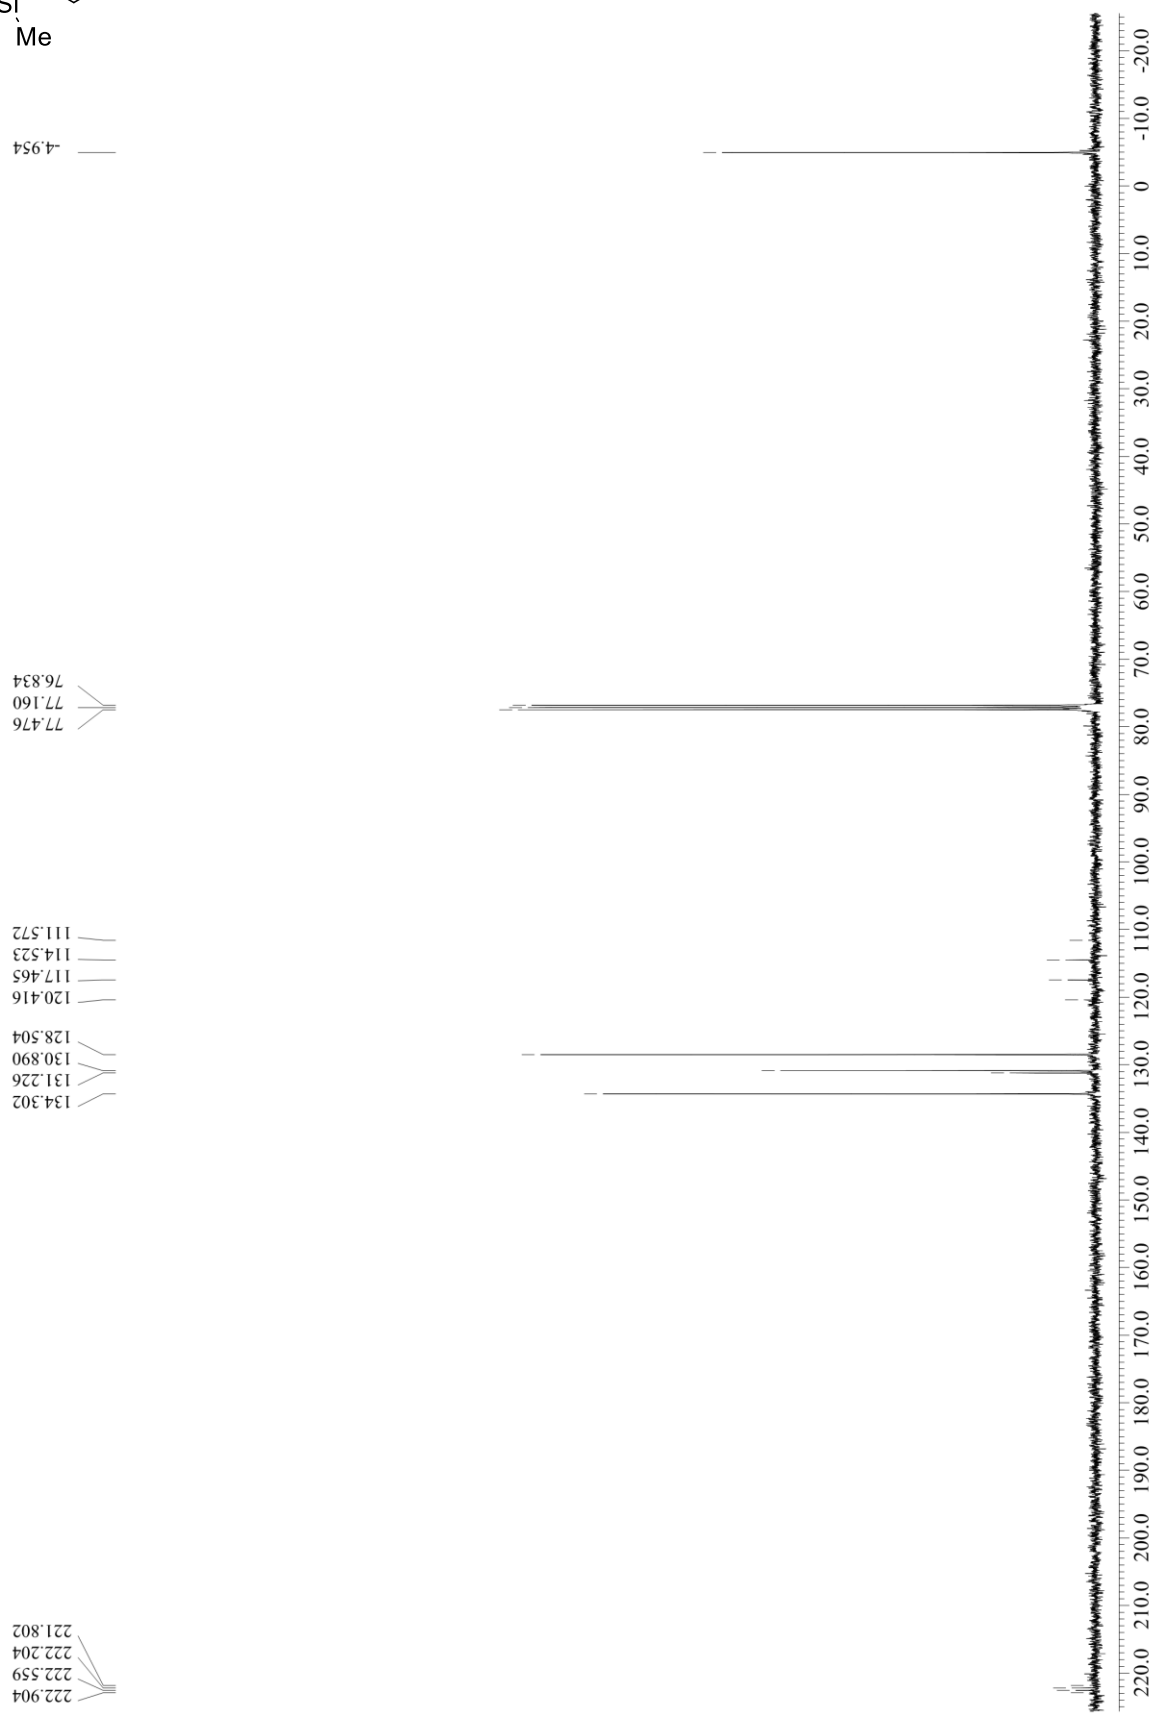

$^{19}\text{F}$  NMR of **5** ( $\text{CDCl}_3$ , 375 MHz, 25 °C)

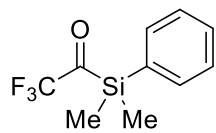

— -79.370

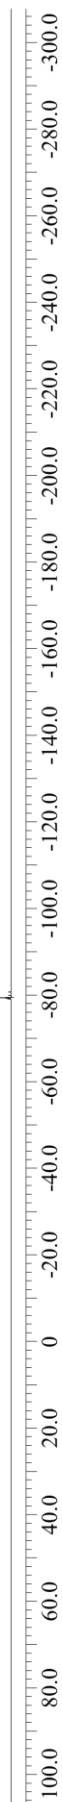



$^1\text{H}$  NMR of **1a** ( $\text{CDCl}_3$ , 400 MHz, 25 °C)

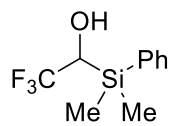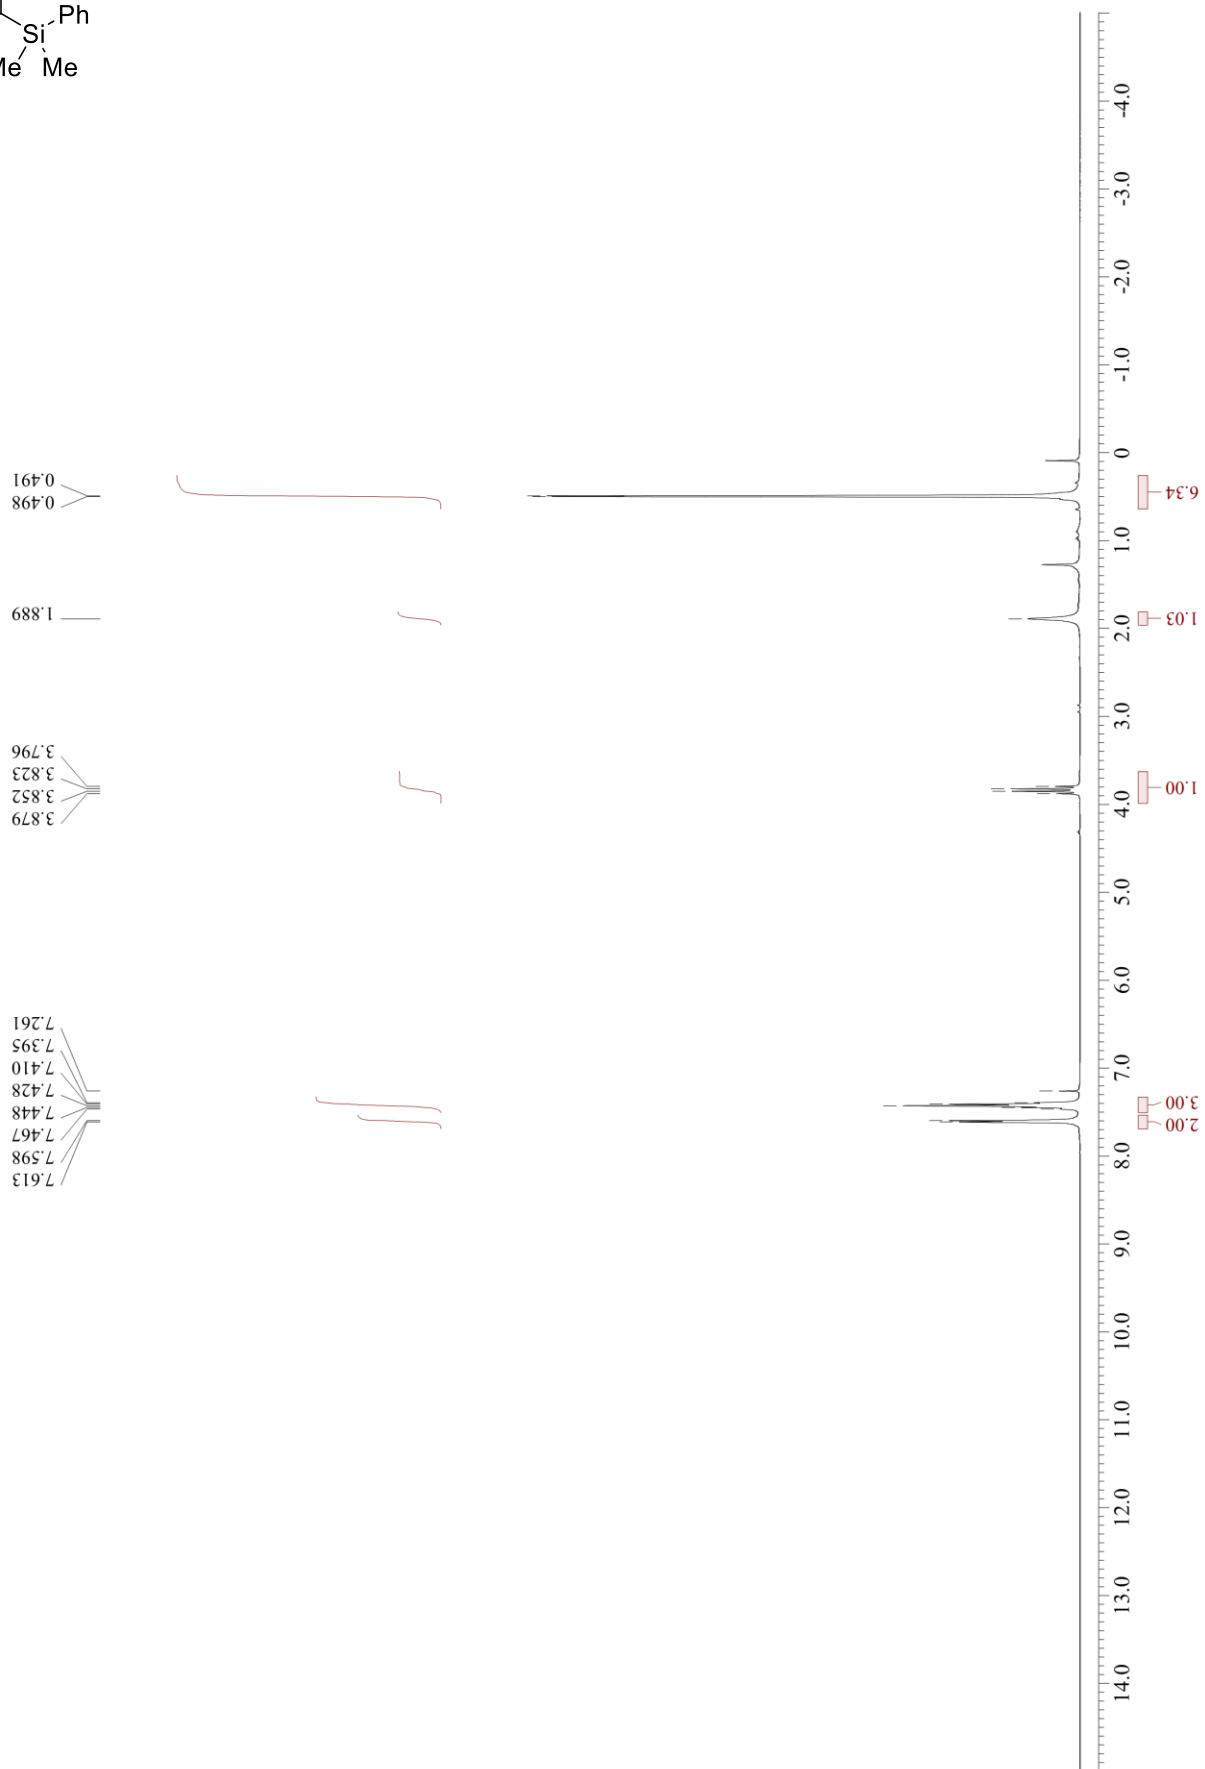

$^{13}\text{C}$  NMR of **1a** ( $\text{CDCl}_3$ , 100 MHz, 25 °C)

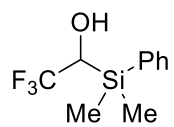

568.5  
-5.395  
-4.686

64.846  
65.172  
65.498  
65.824  
76.844  
77.160  
77.476

122.889  
125.677  
128.236  
128.456  
130.248  
131.245  
134.187  
134.350

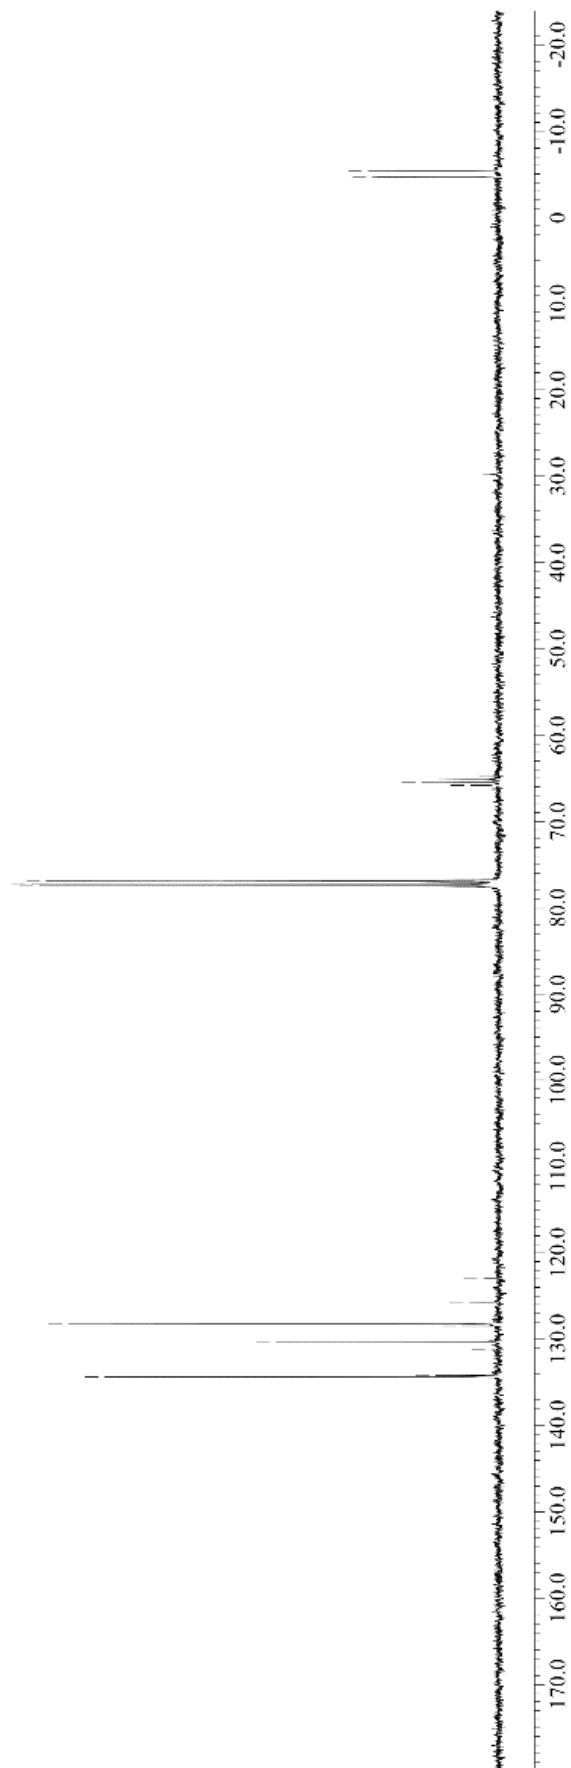

$^{19}\text{F}$  NMR of **1a** ( $\text{CDCl}_3$ , 375 MHz, 25 °C)

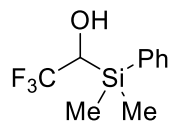

-70.568  
-70.544

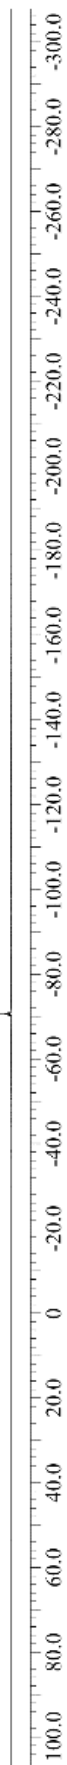

$^1\text{H}$  NMR of **5b** ( $\text{CDCl}_3$ , 400 MHz, 25 °C)

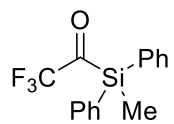

896.0

7.650  
7.633  
7.543  
7.525  
7.507  
7.480  
7.462  
7.444  
7.261

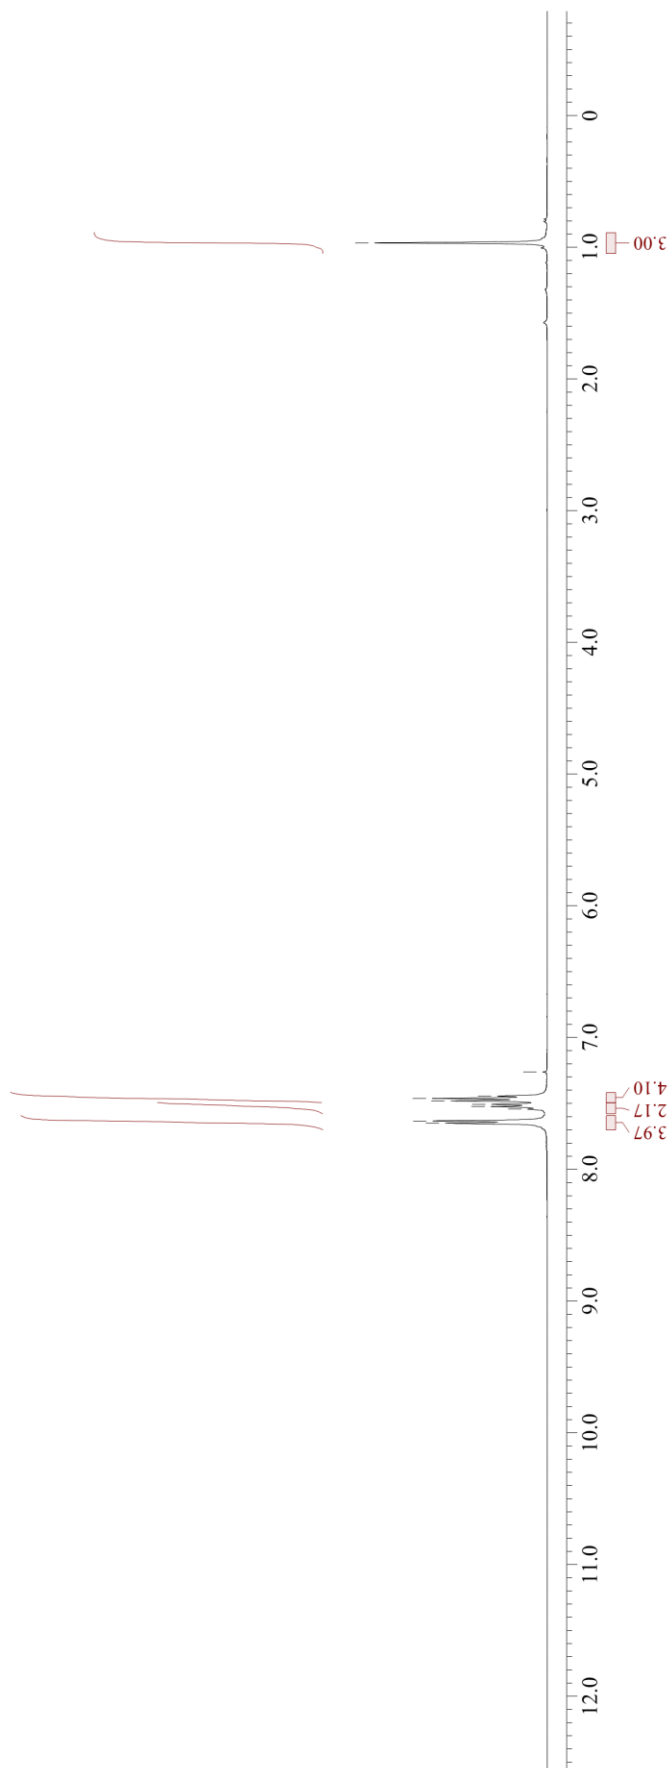

$^{13}\text{C}$  NMR of **5b** ( $\text{CDCl}_3$ , 100 MHz, 25 °C)

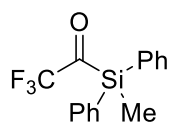

-5.529

77.476  
77.160  
76.844

135.193  
131.053  
129.903  
128.562  
120.349  
117.398  
114.446  
111.495

221.591  
221.236  
220.891  
220.537

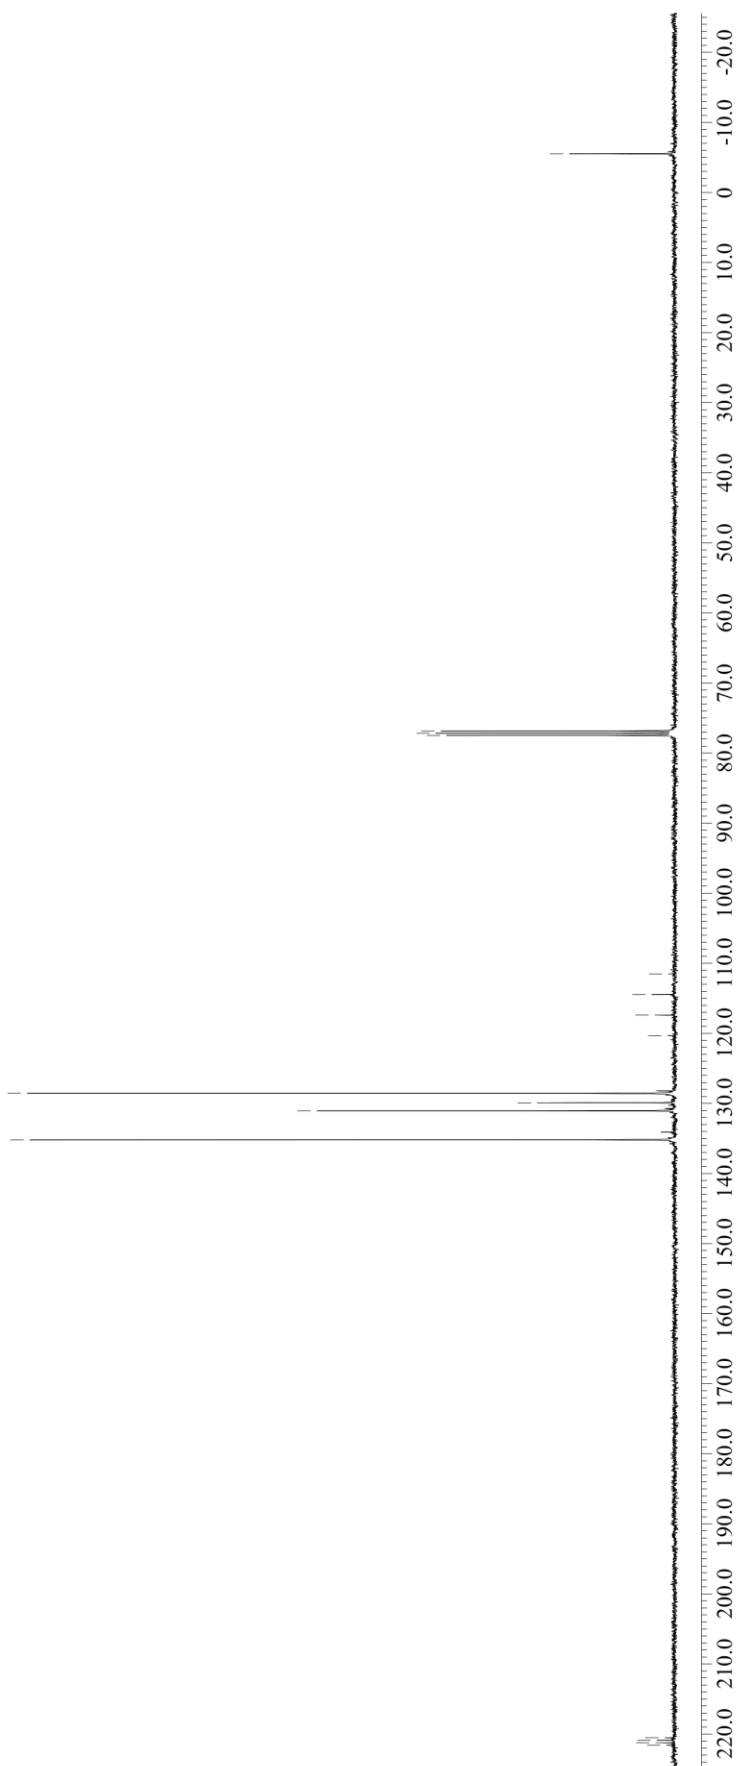

$^{19}\text{F}$  NMR of **5b** ( $\text{CDCl}_3$ , 375 MHz, 25 °C)

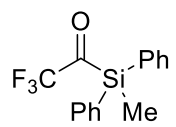

— -78.902

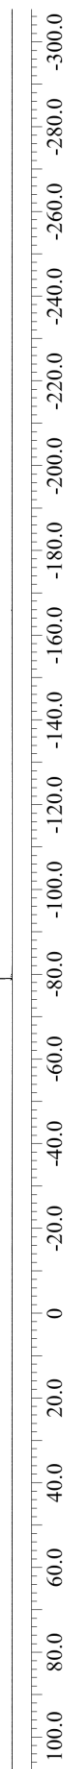

$^1\text{H}$  NMR of **1b** ( $\text{CDCl}_3$ , 400 MHz, 25  $^\circ\text{C}$ )

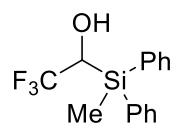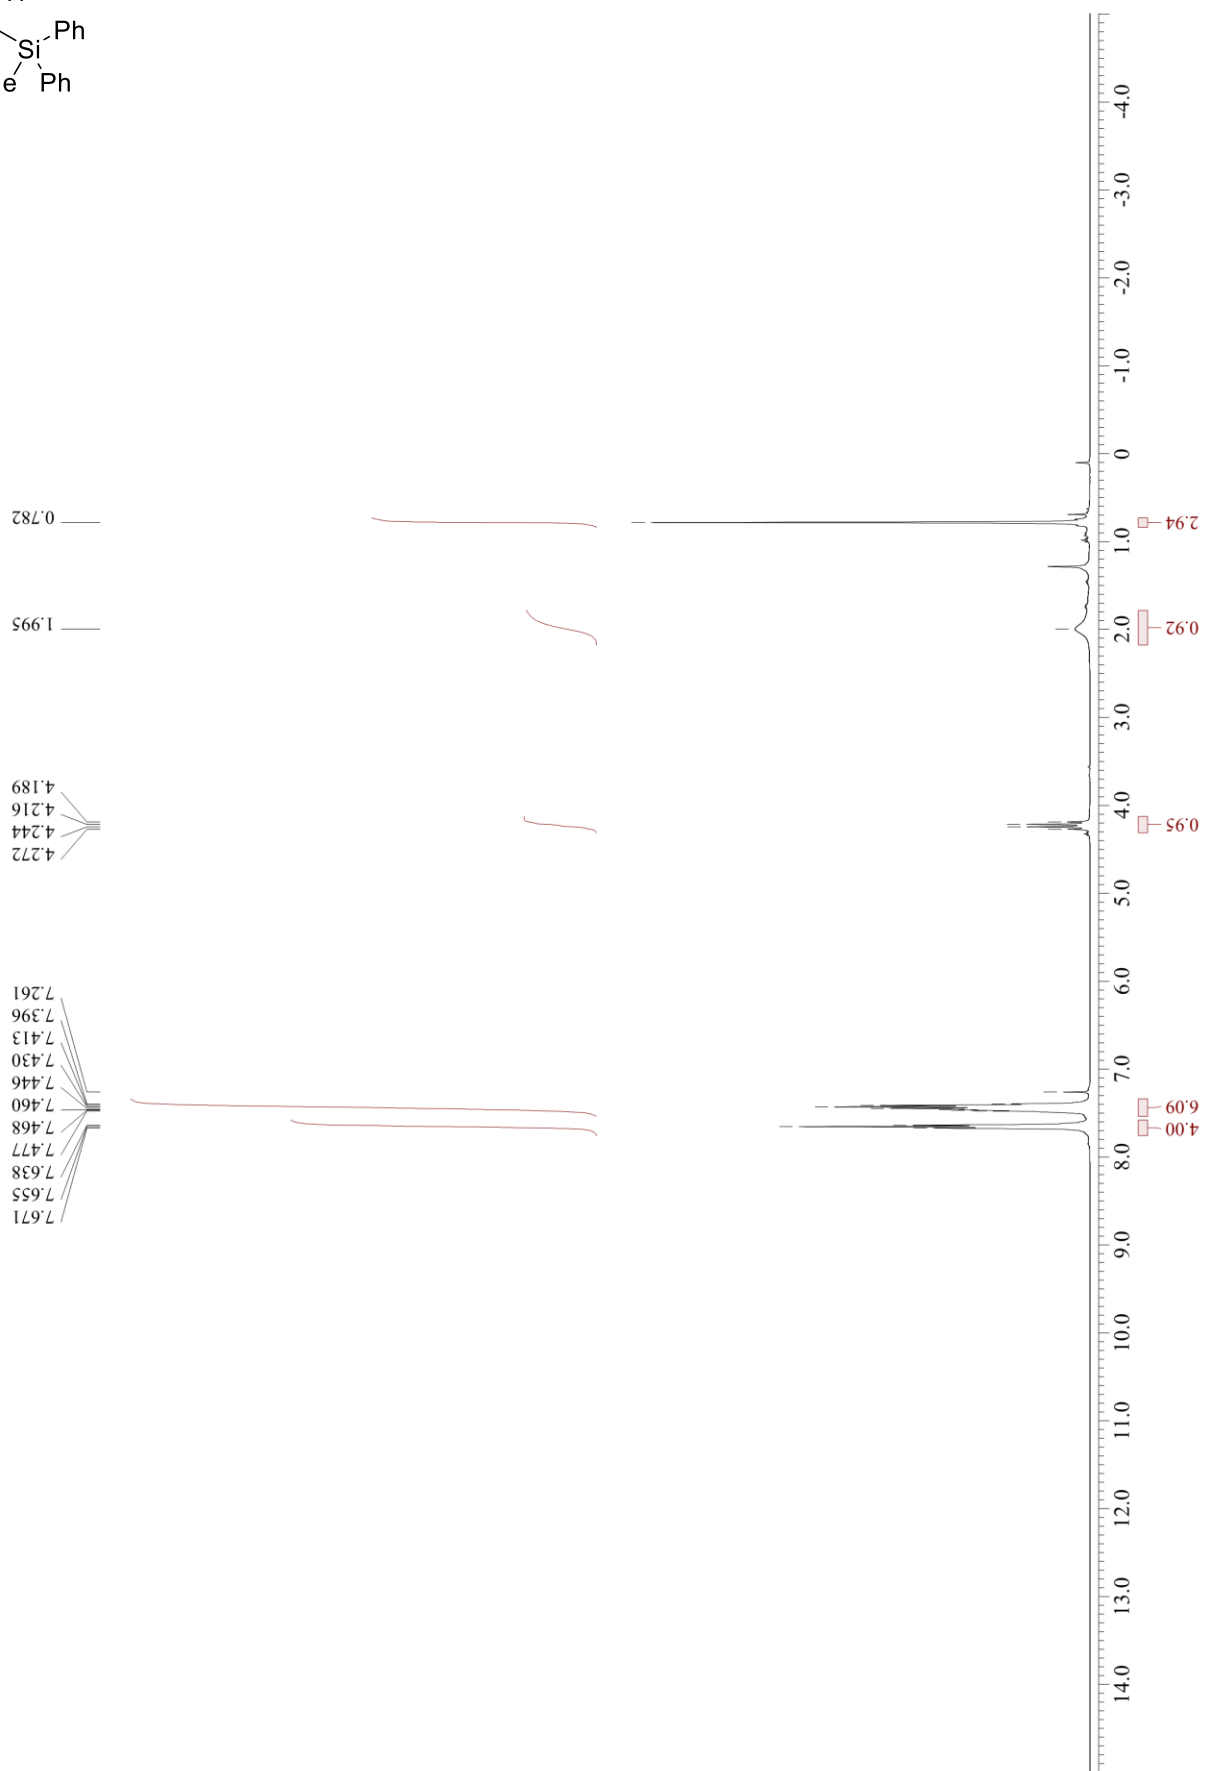

$^{13}\text{C}$  NMR of **1b** ( $\text{CDCl}_3$ , 100 MHz, 25 °C)

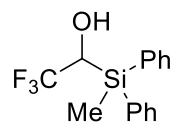

-5.894

64.377  
64.702  
65.028  
65.364  
76.844  
77.160  
77.476

122.726  
125.514  
128.073  
128.303  
128.322  
130.392  
130.517  
131.082  
131.964  
132.749  
134.982  
135.481

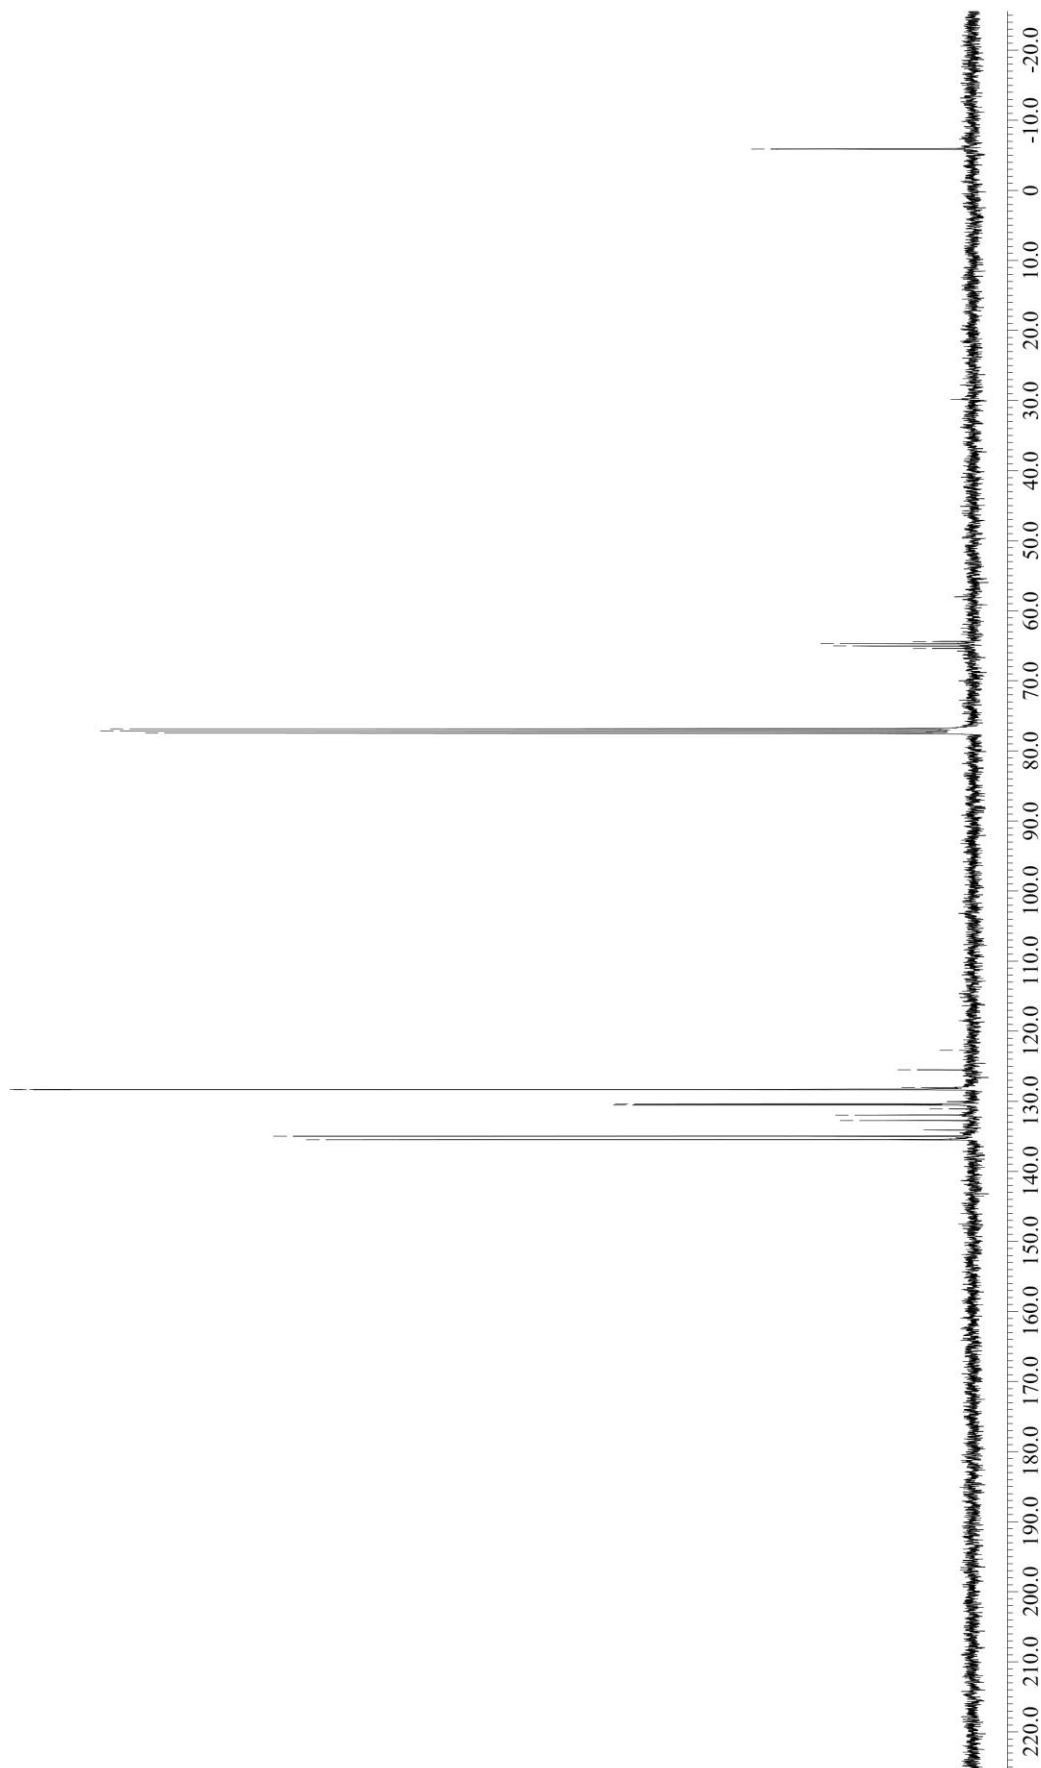



$^{19}\text{F}$  NMR of **1b** ( $\text{CDCl}_3$ , 375 MHz, 25 °C)

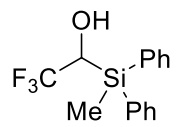

66.69  
89.76

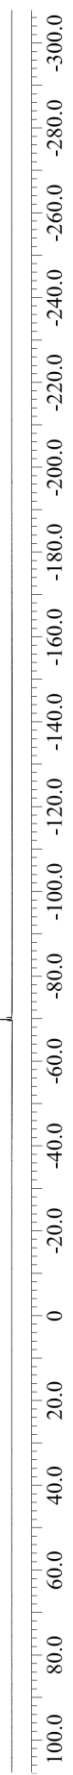

$^1\text{H}$  NMR of **1c** ( $\text{CDCl}_3$ , 400 MHz, 25 °C)

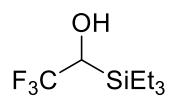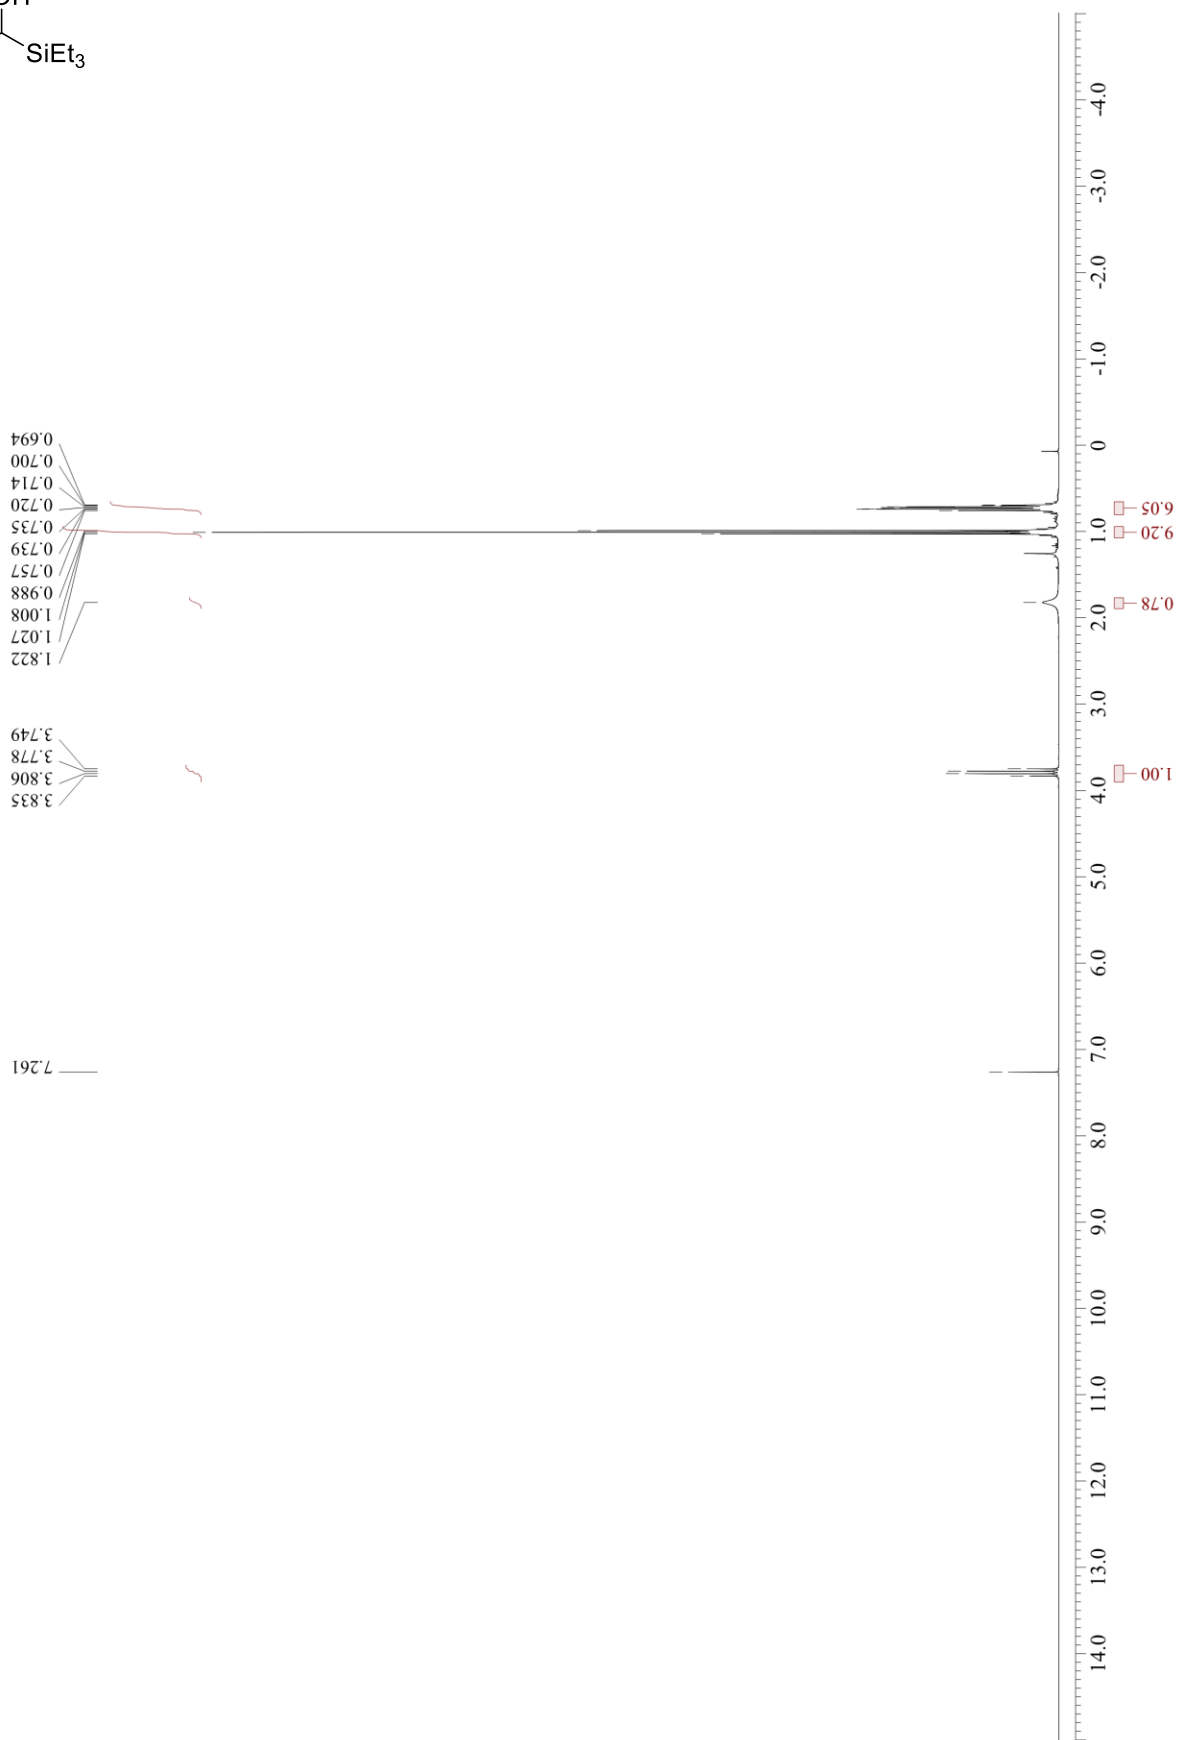

$^{13}\text{C}$  NMR of **1c** ( $\text{CDCl}_3$ , 100 MHz, 25 °C)

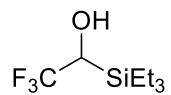

1.888  
7.187

63.600  
63.936  
64.262  
64.597  
76.844  
77.160  
77.486

123.291  
126.070  
128.859  
131.638

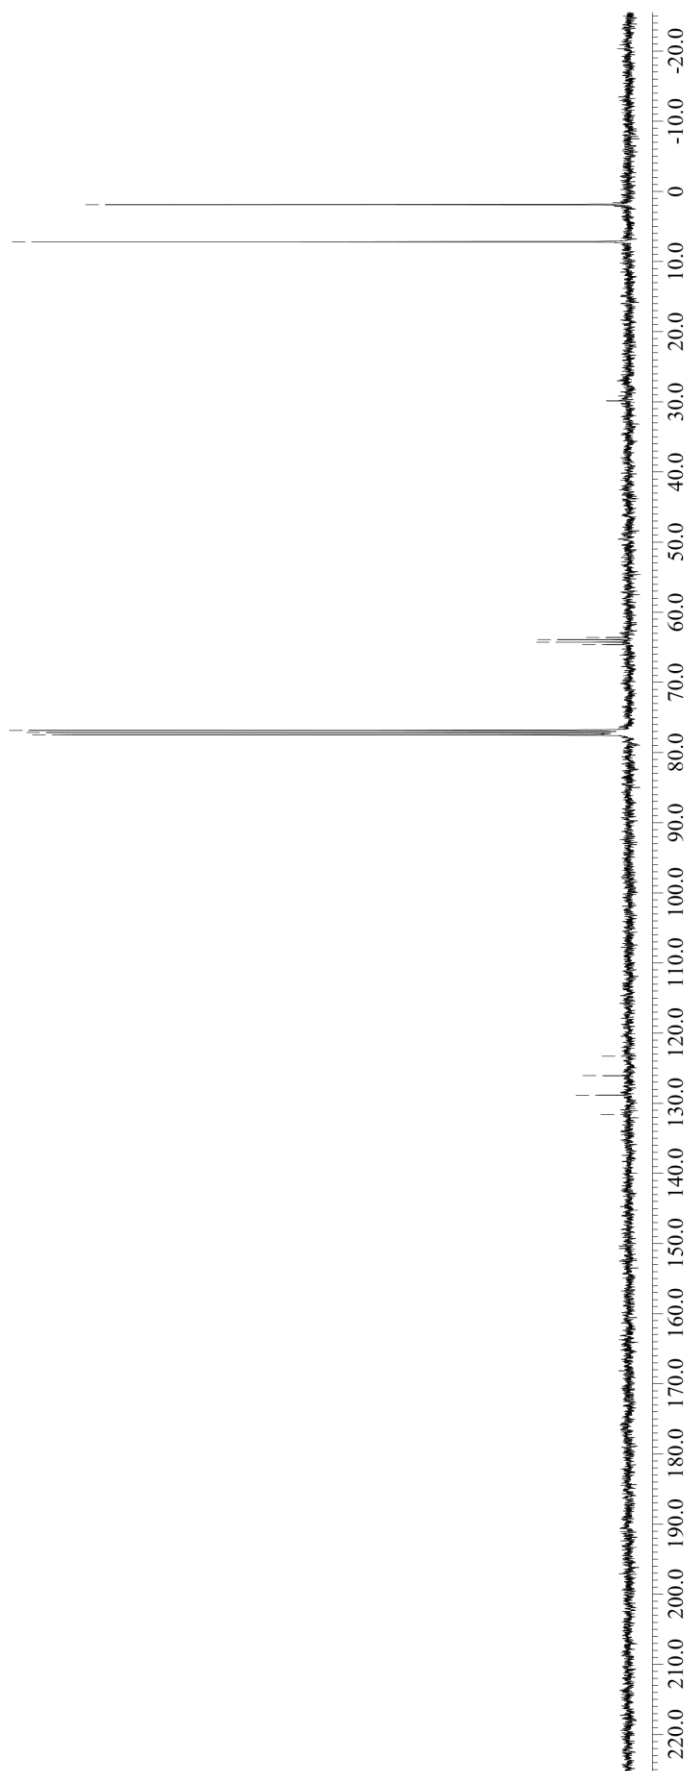

$^{19}\text{F}$  NMR of **1c** ( $\text{CDCl}_3$ , 375 MHz, 25 °C)

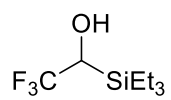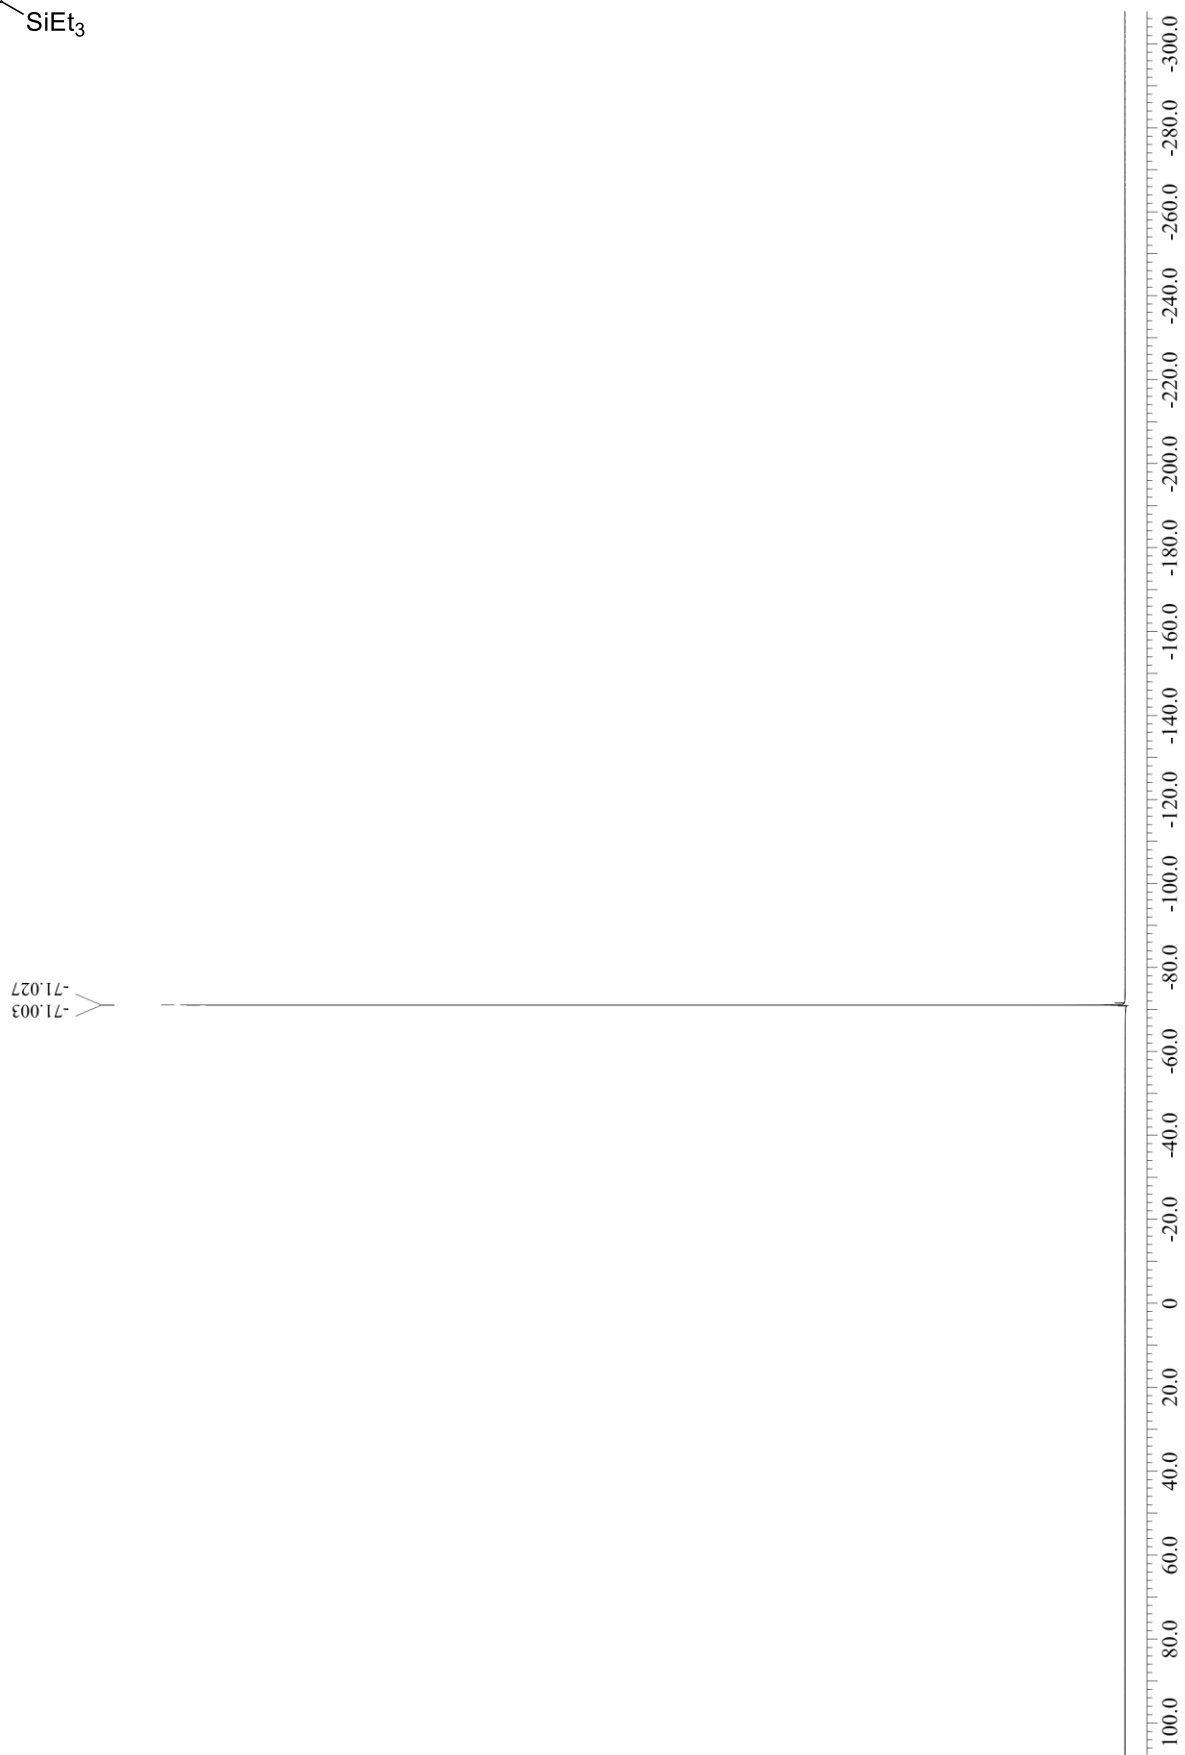

$^1\text{H}$  NMR of **1d** ( $\text{CDCl}_3$ , 400 MHz, 25 °C)

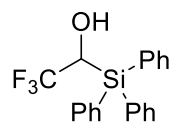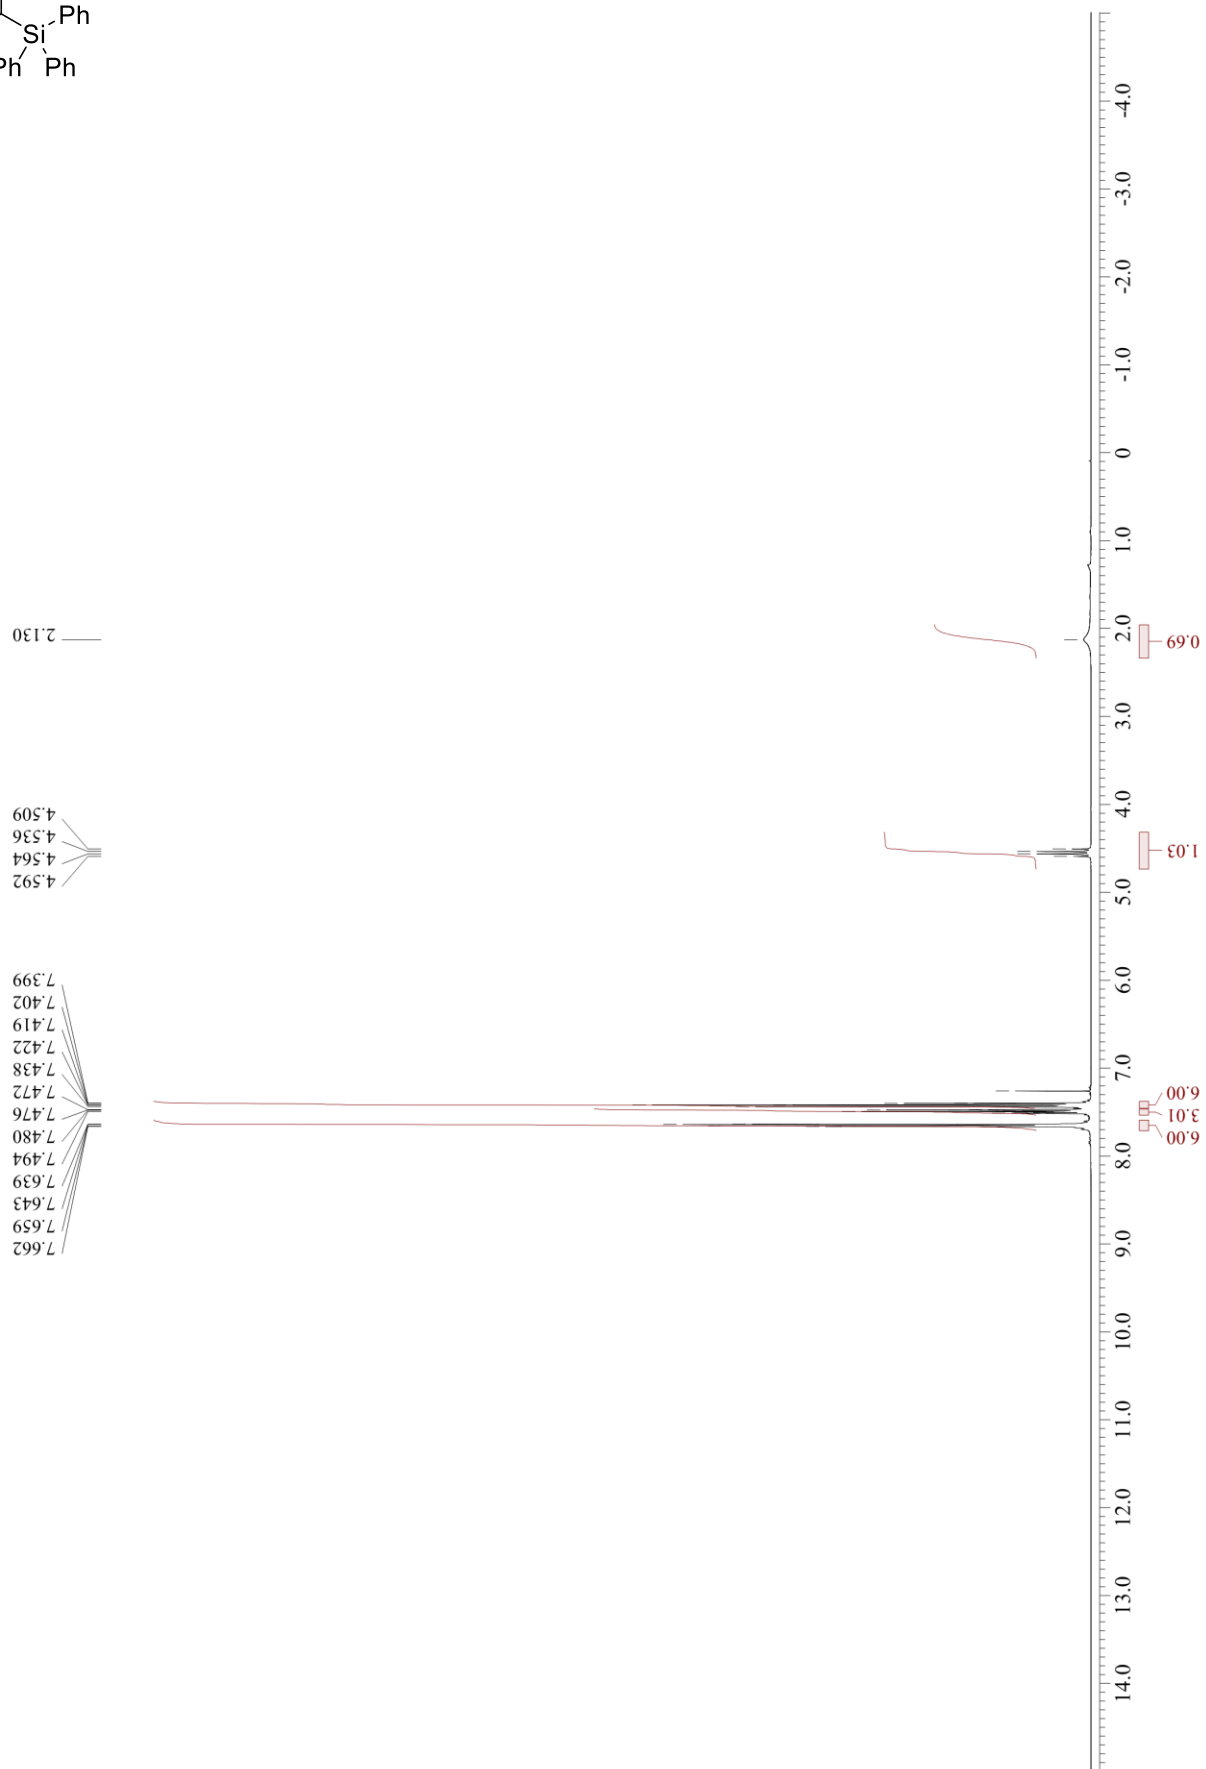

$^{13}\text{C}$  NMR of **1d** ( $\text{CDCl}_3$ , 100 MHz, 25  $^\circ\text{C}$ )

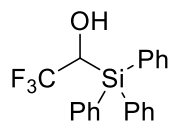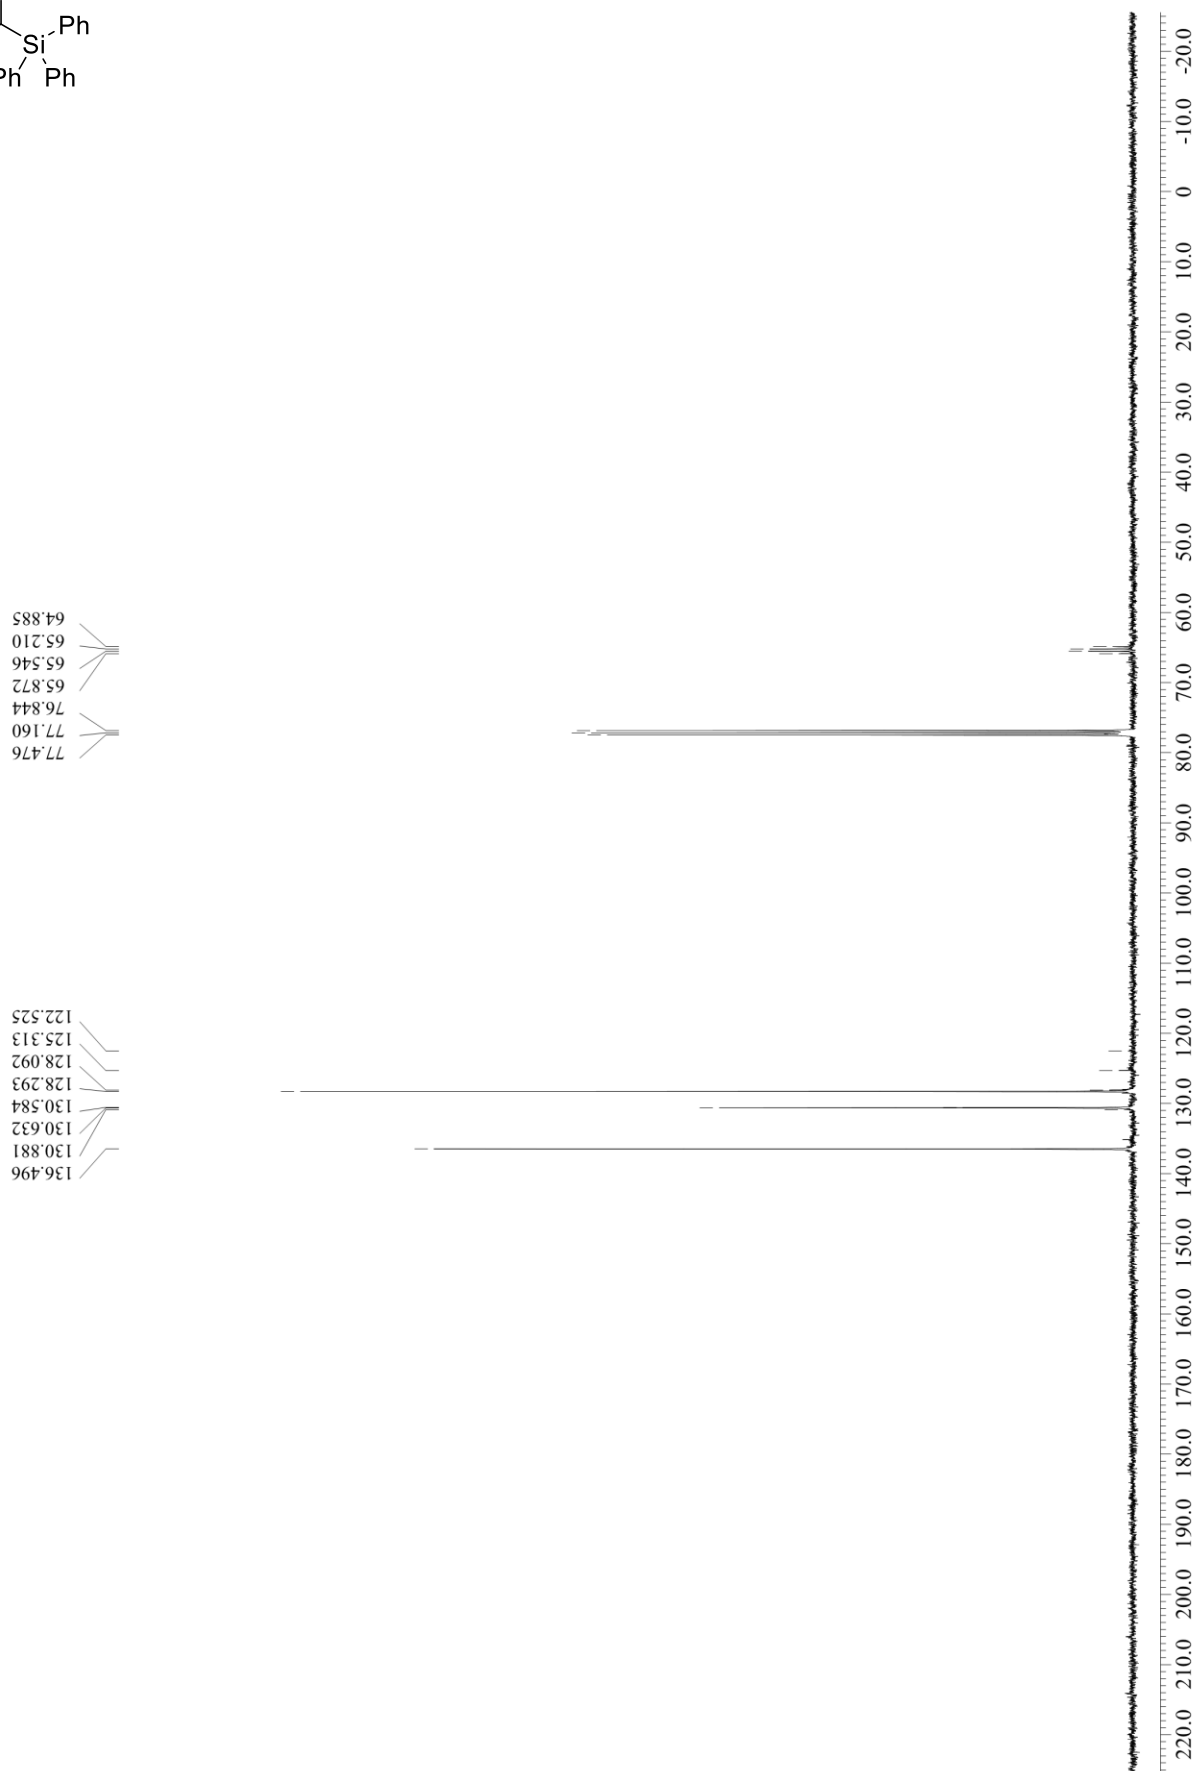

$^{19}\text{F}$  NMR of **1d** ( $\text{CDCl}_3$ , 375 MHz, 25 °C)

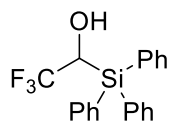

-68.437  
-68.405

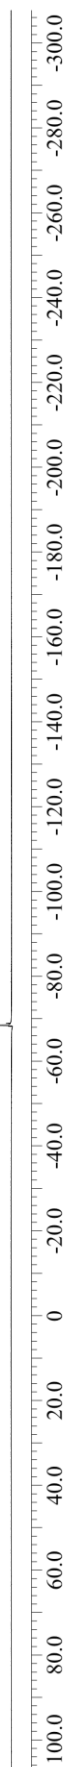

$^1\text{H}$  NMR of **6** ( $\text{CDCl}_3$ , 400 MHz, 25  $^\circ\text{C}$ )

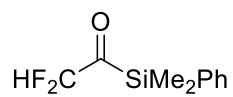

0.622

5.528  
5.391  
5.254

7.581  
7.565  
7.453  
7.436  
7.428  
7.409  
7.393  
7.261

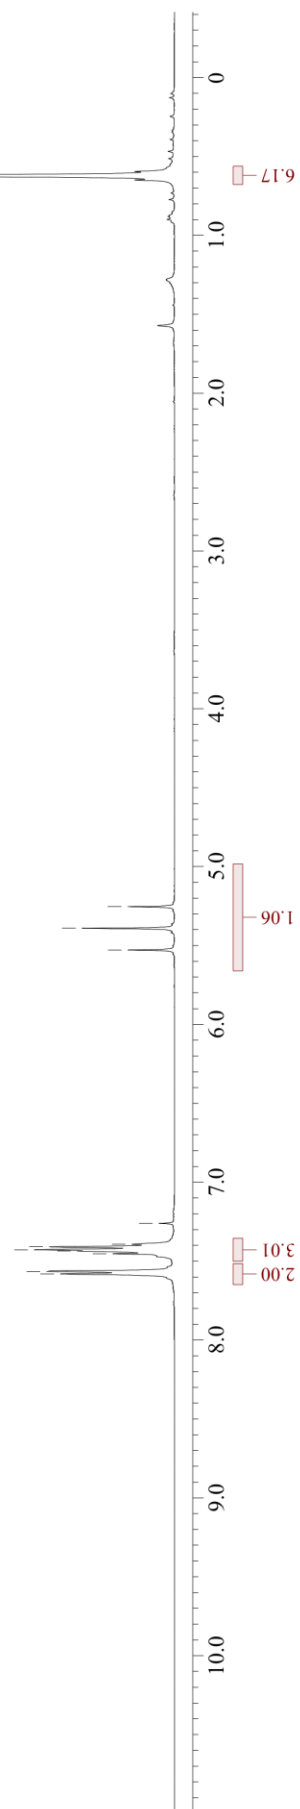



$^{13}\text{C}$  NMR of **6** ( $\text{CDCl}_3$ , 100 MHz, 25 °C)

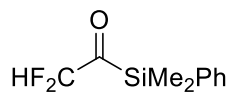

4.747

76.840  
77.160  
77.480

109.644  
112.147  
114.650

128.389  
130.538  
132.390  
134.333

232.677  
232.997  
233.317

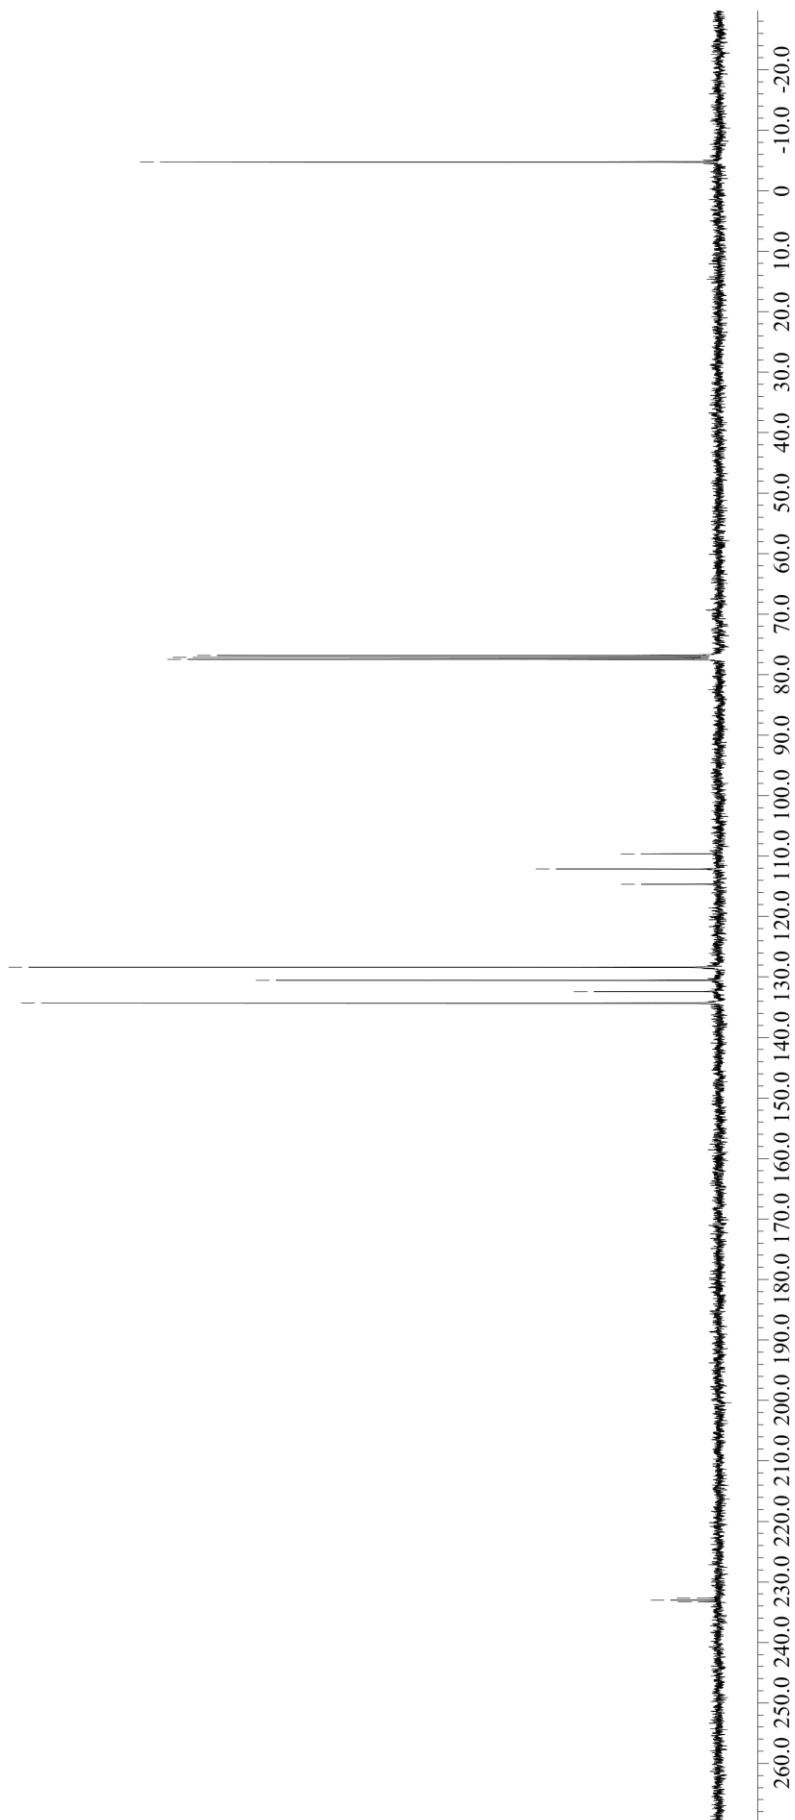

$^{19}\text{F}$  NMR of **6** ( $\text{CDCl}_3$ , 375 MHz, 25 °C)

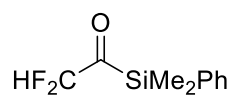

-125.360  
-125.217

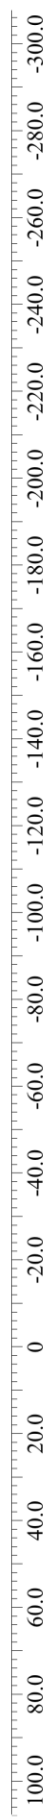

$^1\text{H}$  NMR of **2a** ( $\text{CDCl}_3$ , 400 MHz, 25 °C)

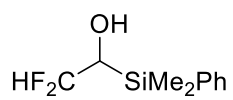

0.478  
0.471

3.752  
3.742  
3.716  
3.706  
3.698  
3.687  
3.662  
3.651

5.914  
5.904  
5.772  
5.762  
5.632  
5.622

7.617  
7.612  
7.608  
7.603  
7.598  
7.593  
7.444  
7.435  
7.430  
7.411  
7.398  
7.261

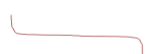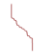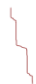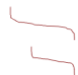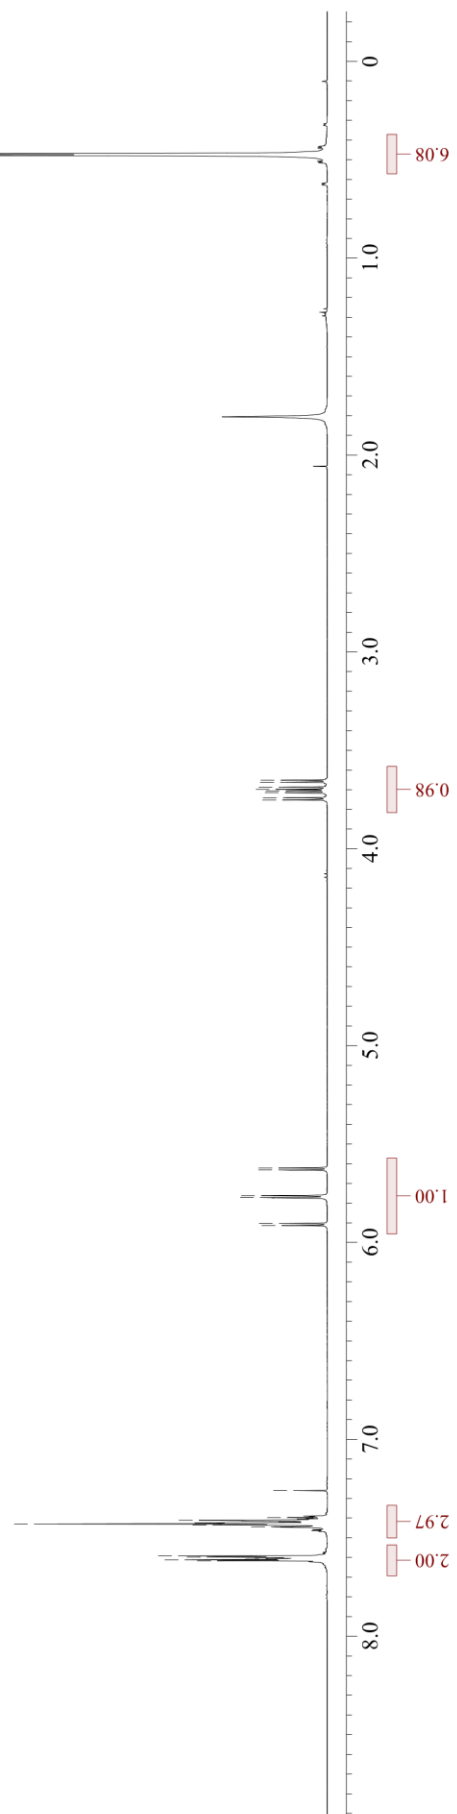

$^{13}\text{C}$  NMR of **2a** ( $\text{CDCl}_3$ , 100 MHz, 25 °C)

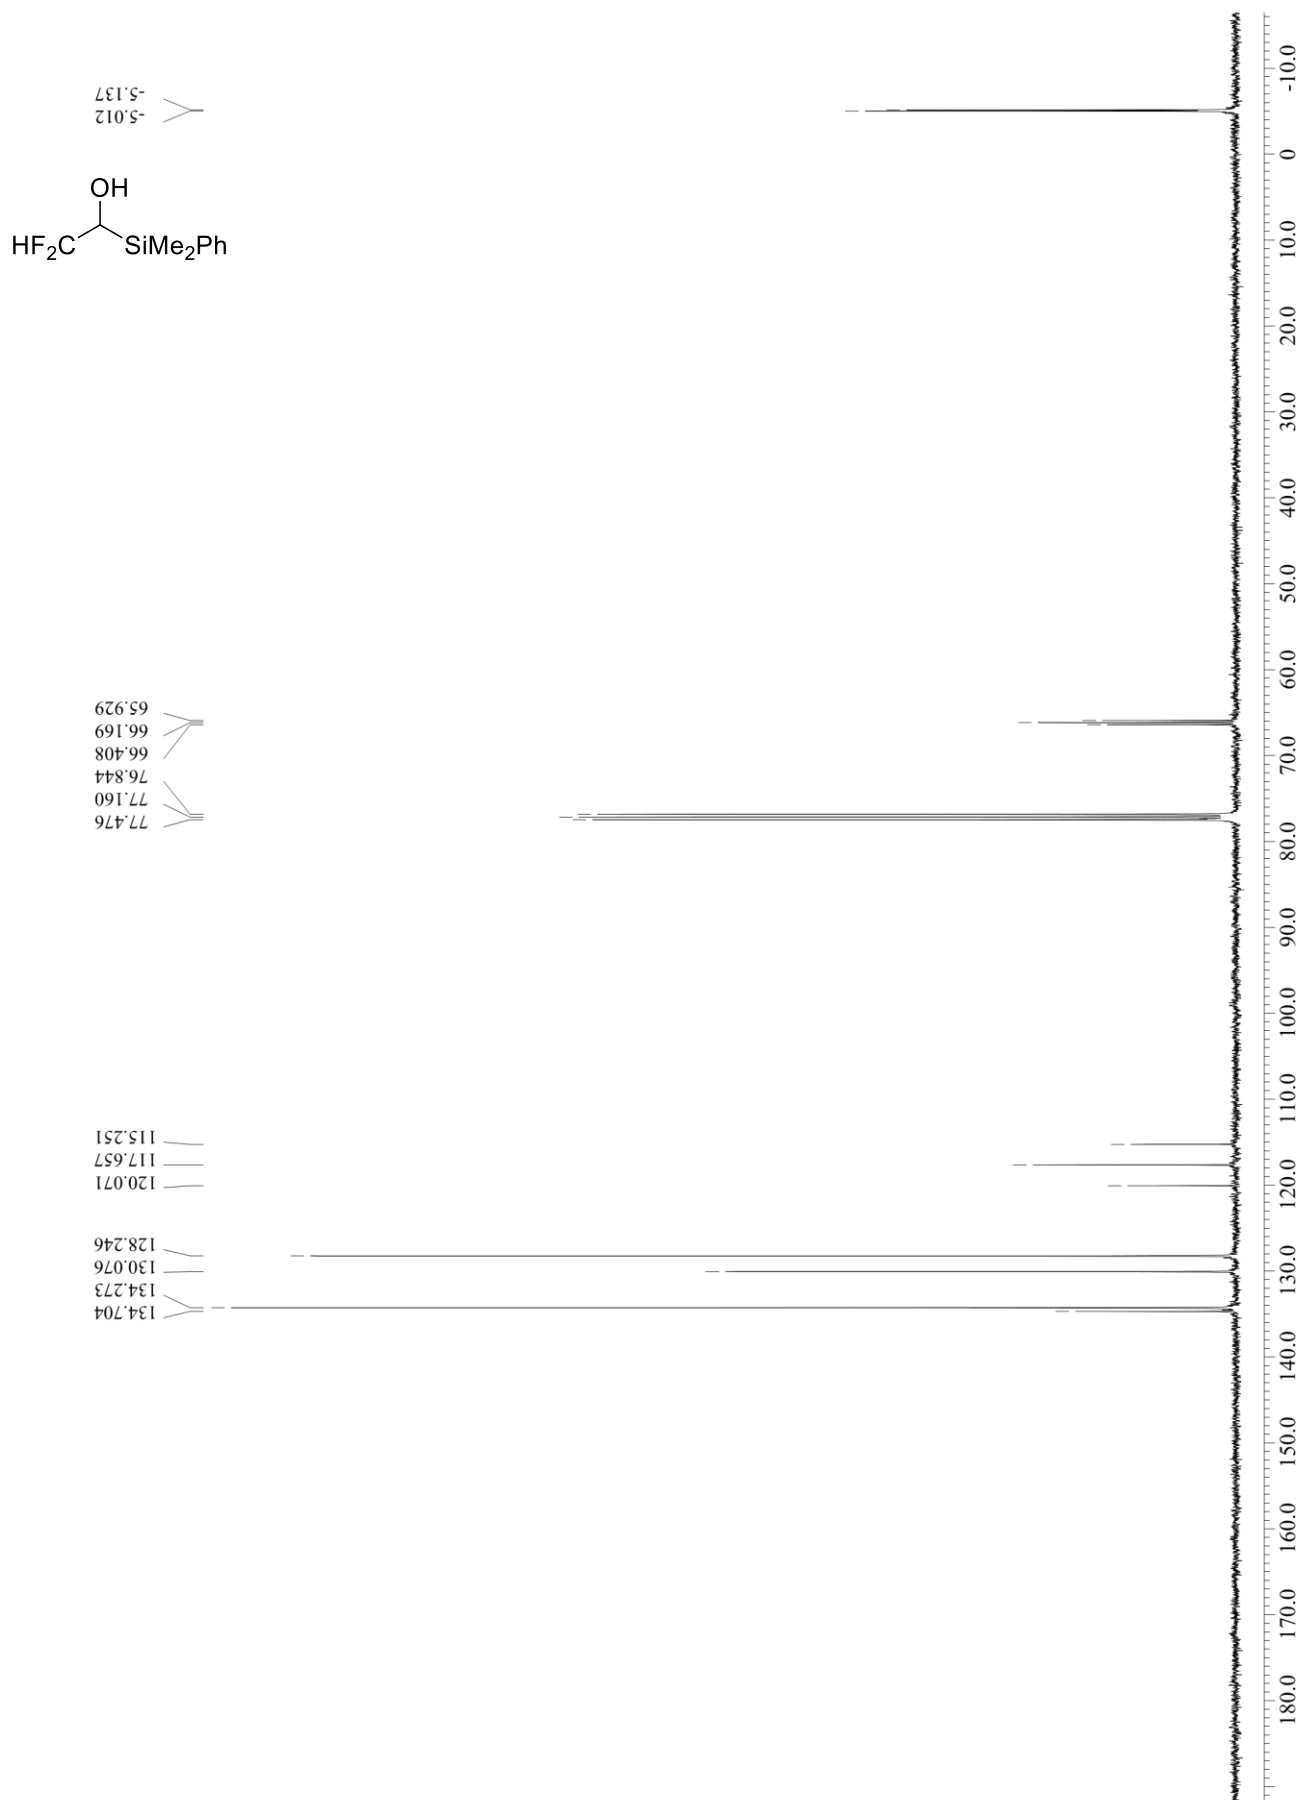

$^{19}\text{F}$  NMR of **2a** ( $\text{CDCl}_3$ , 375 MHz, 25 °C)

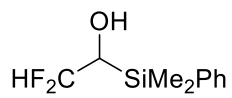

-123.039  
-122.888  
-122.326  
-122.286  
-122.175  
-122.136  
-122.096  
-122.041  
-121.945  
-121.890  
-121.351  
-121.201  
-121.137

10.0 0 -10.0 -20.0 -30.0 -40.0 -50.0 -60.0 -70.0 -80.0 -90.0 -100.0 -110.0 -120.0 -130.0 -140.0 -150.0 -160.0 -170.0 -180.0 -190.0 -200.0

$^1\text{H}$  NMR of **7j** ( $\text{CDCl}_3$ , 400 MHz, 25 °C)

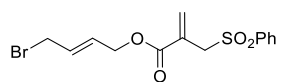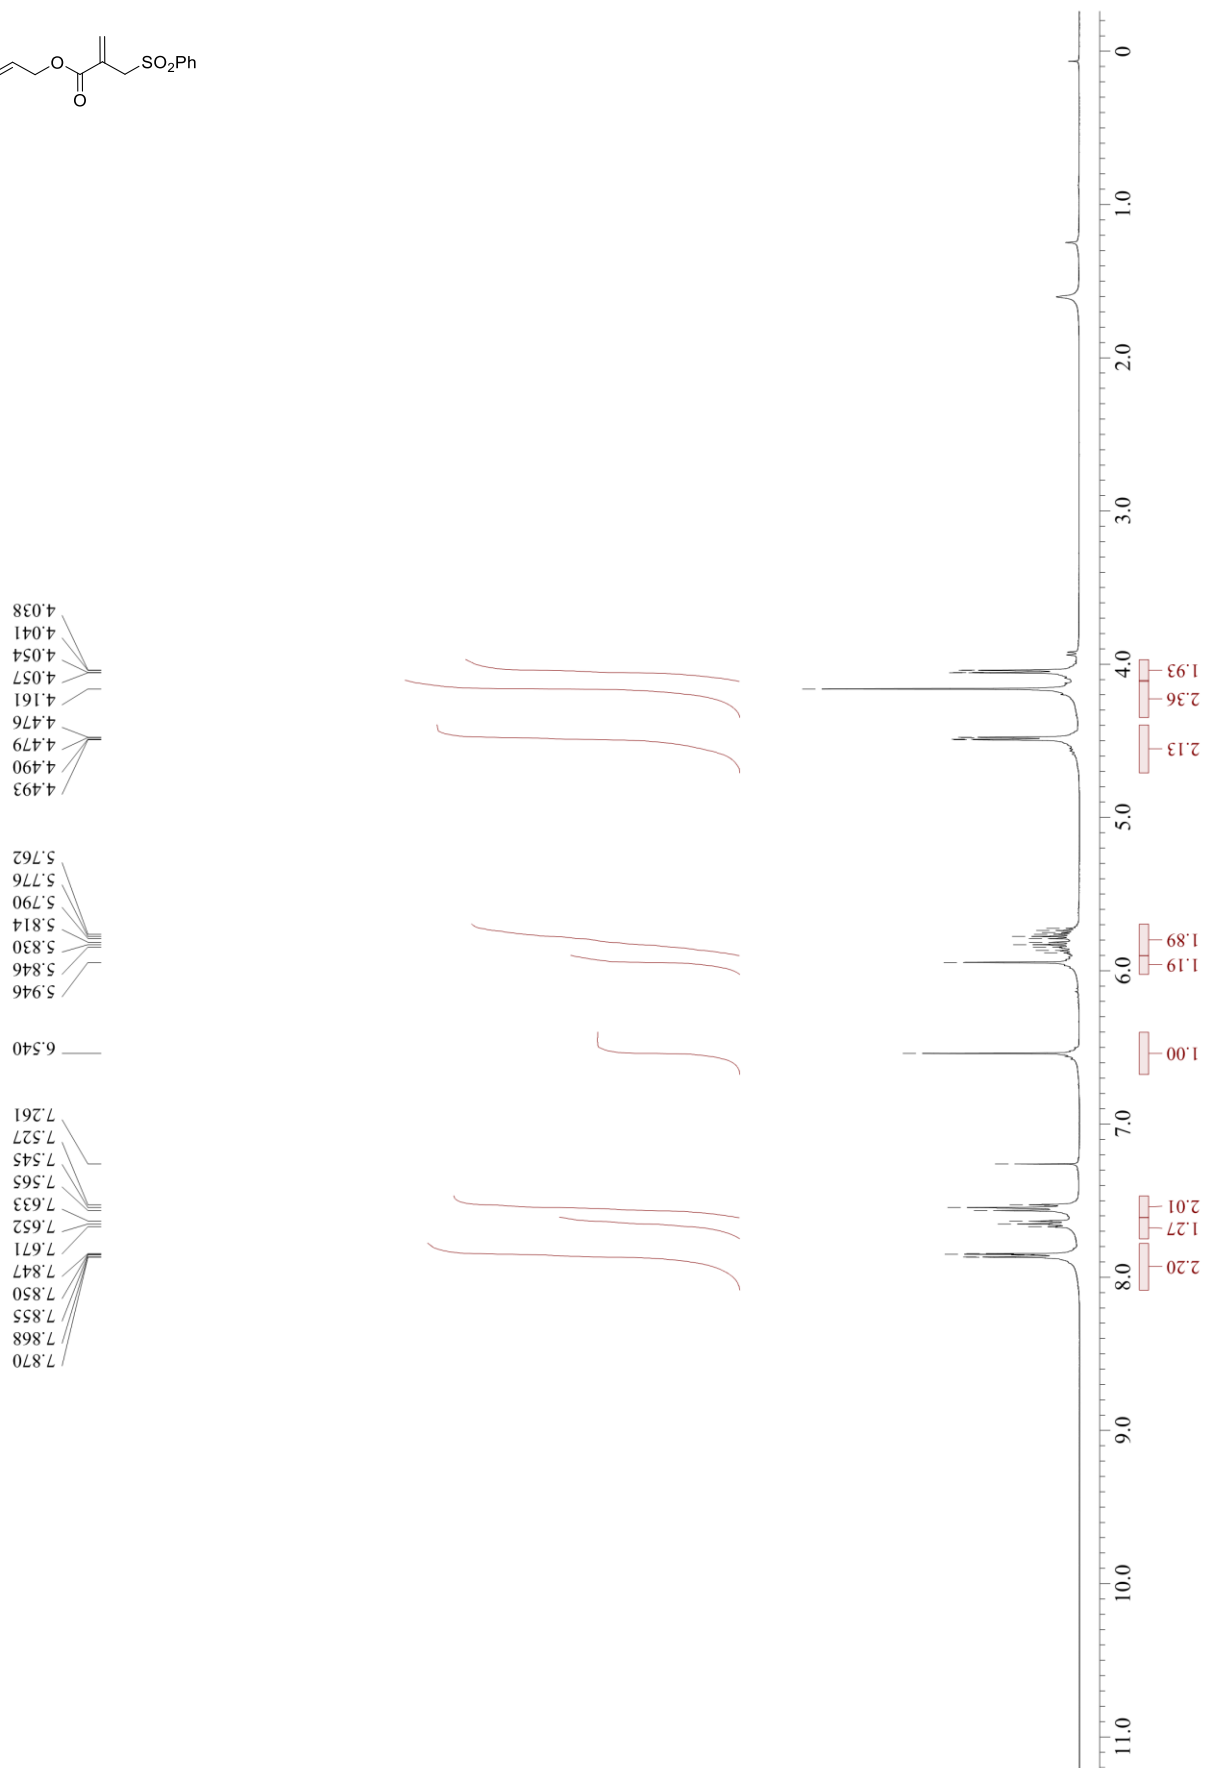

$^{13}\text{C}$  NMR of **7j** ( $\text{CDCl}_3$ , 100 MHz, 25 °C)

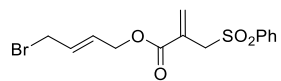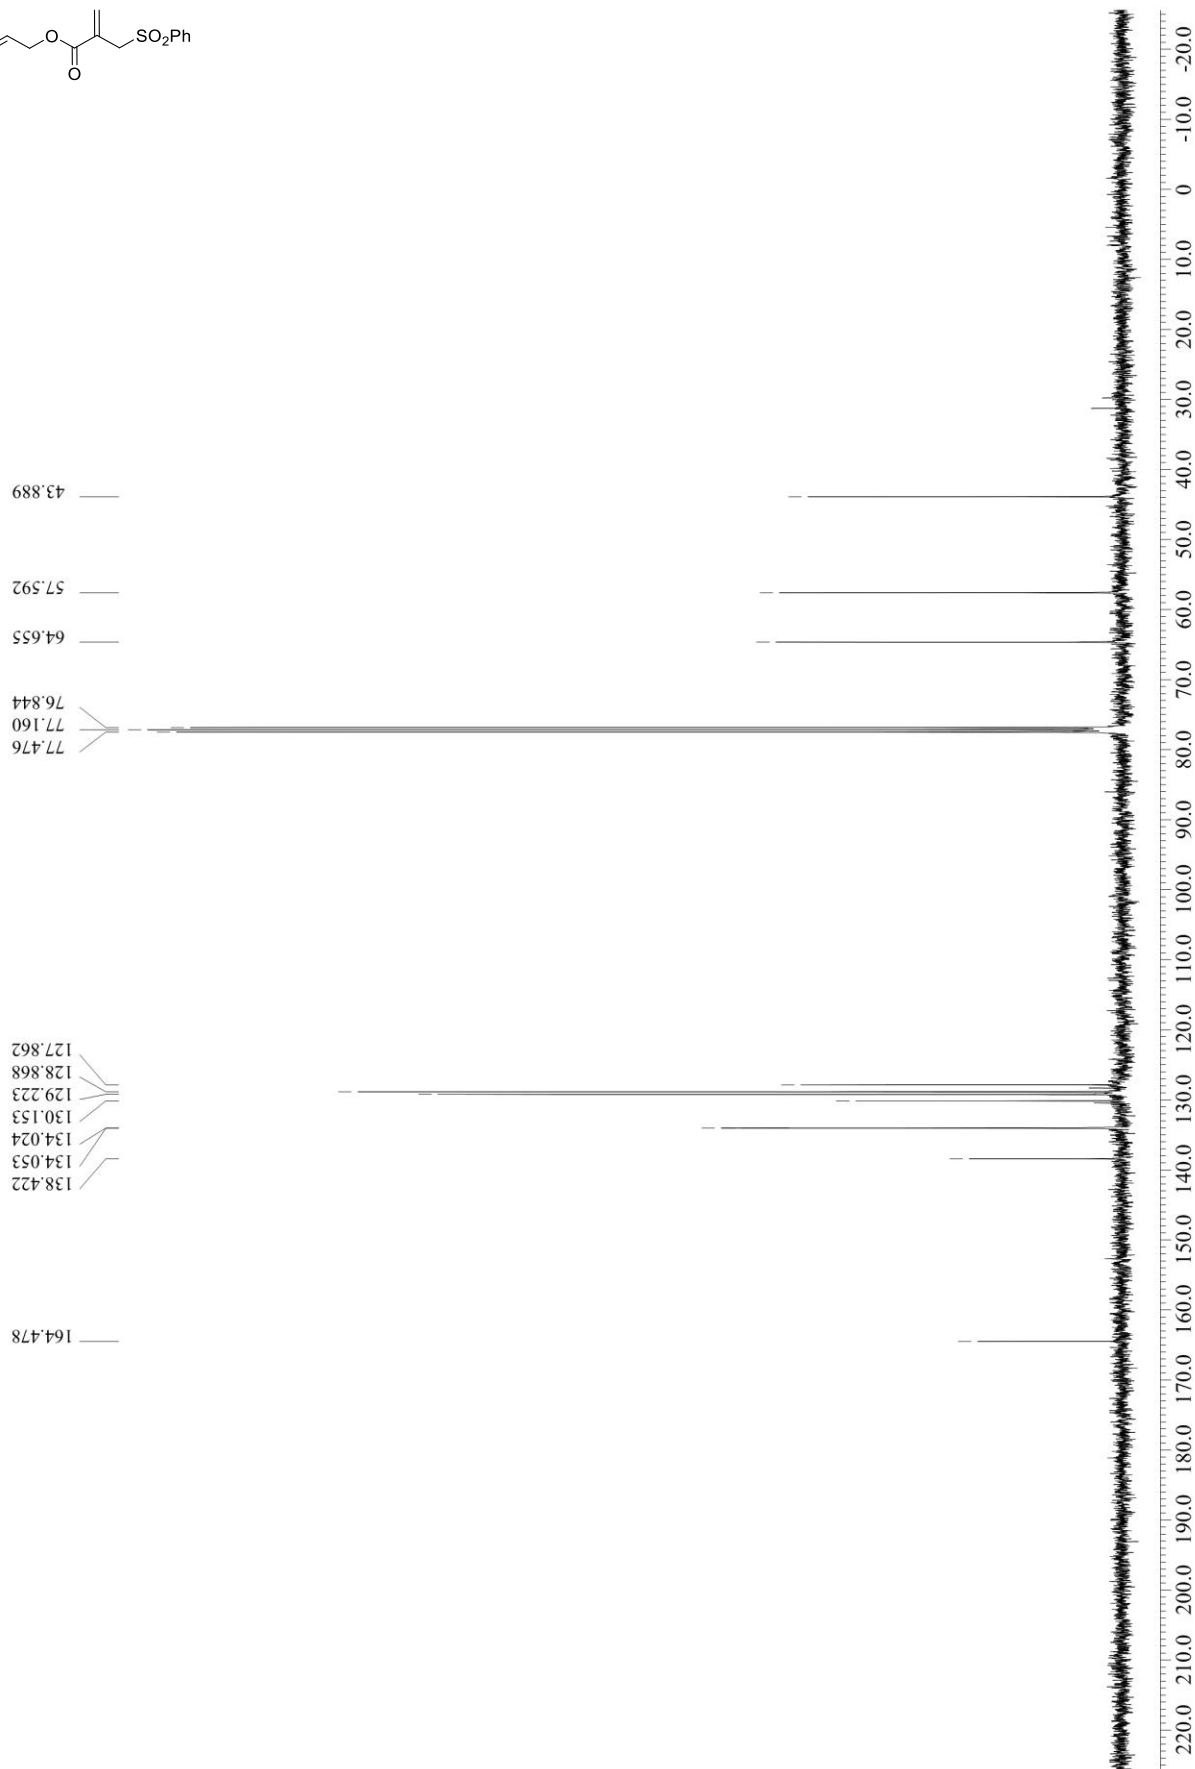

$^1\text{H NMR}$  of **7r** ( $\text{CDCl}_3$ , 400 MHz, 25  $^\circ\text{C}$ )

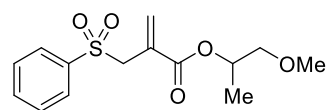

1.121  
1.105

4.964  
4.948  
4.938  
4.932  
4.922  
4.917  
4.906  
4.890  
4.197  
4.162  
4.152  
4.117  
3.401  
3.386  
3.375  
3.360  
3.322  
3.302  
3.291

5.915

6.504

7.856  
7.837  
7.650  
7.632  
7.613  
7.545  
7.525  
7.506  
7.261

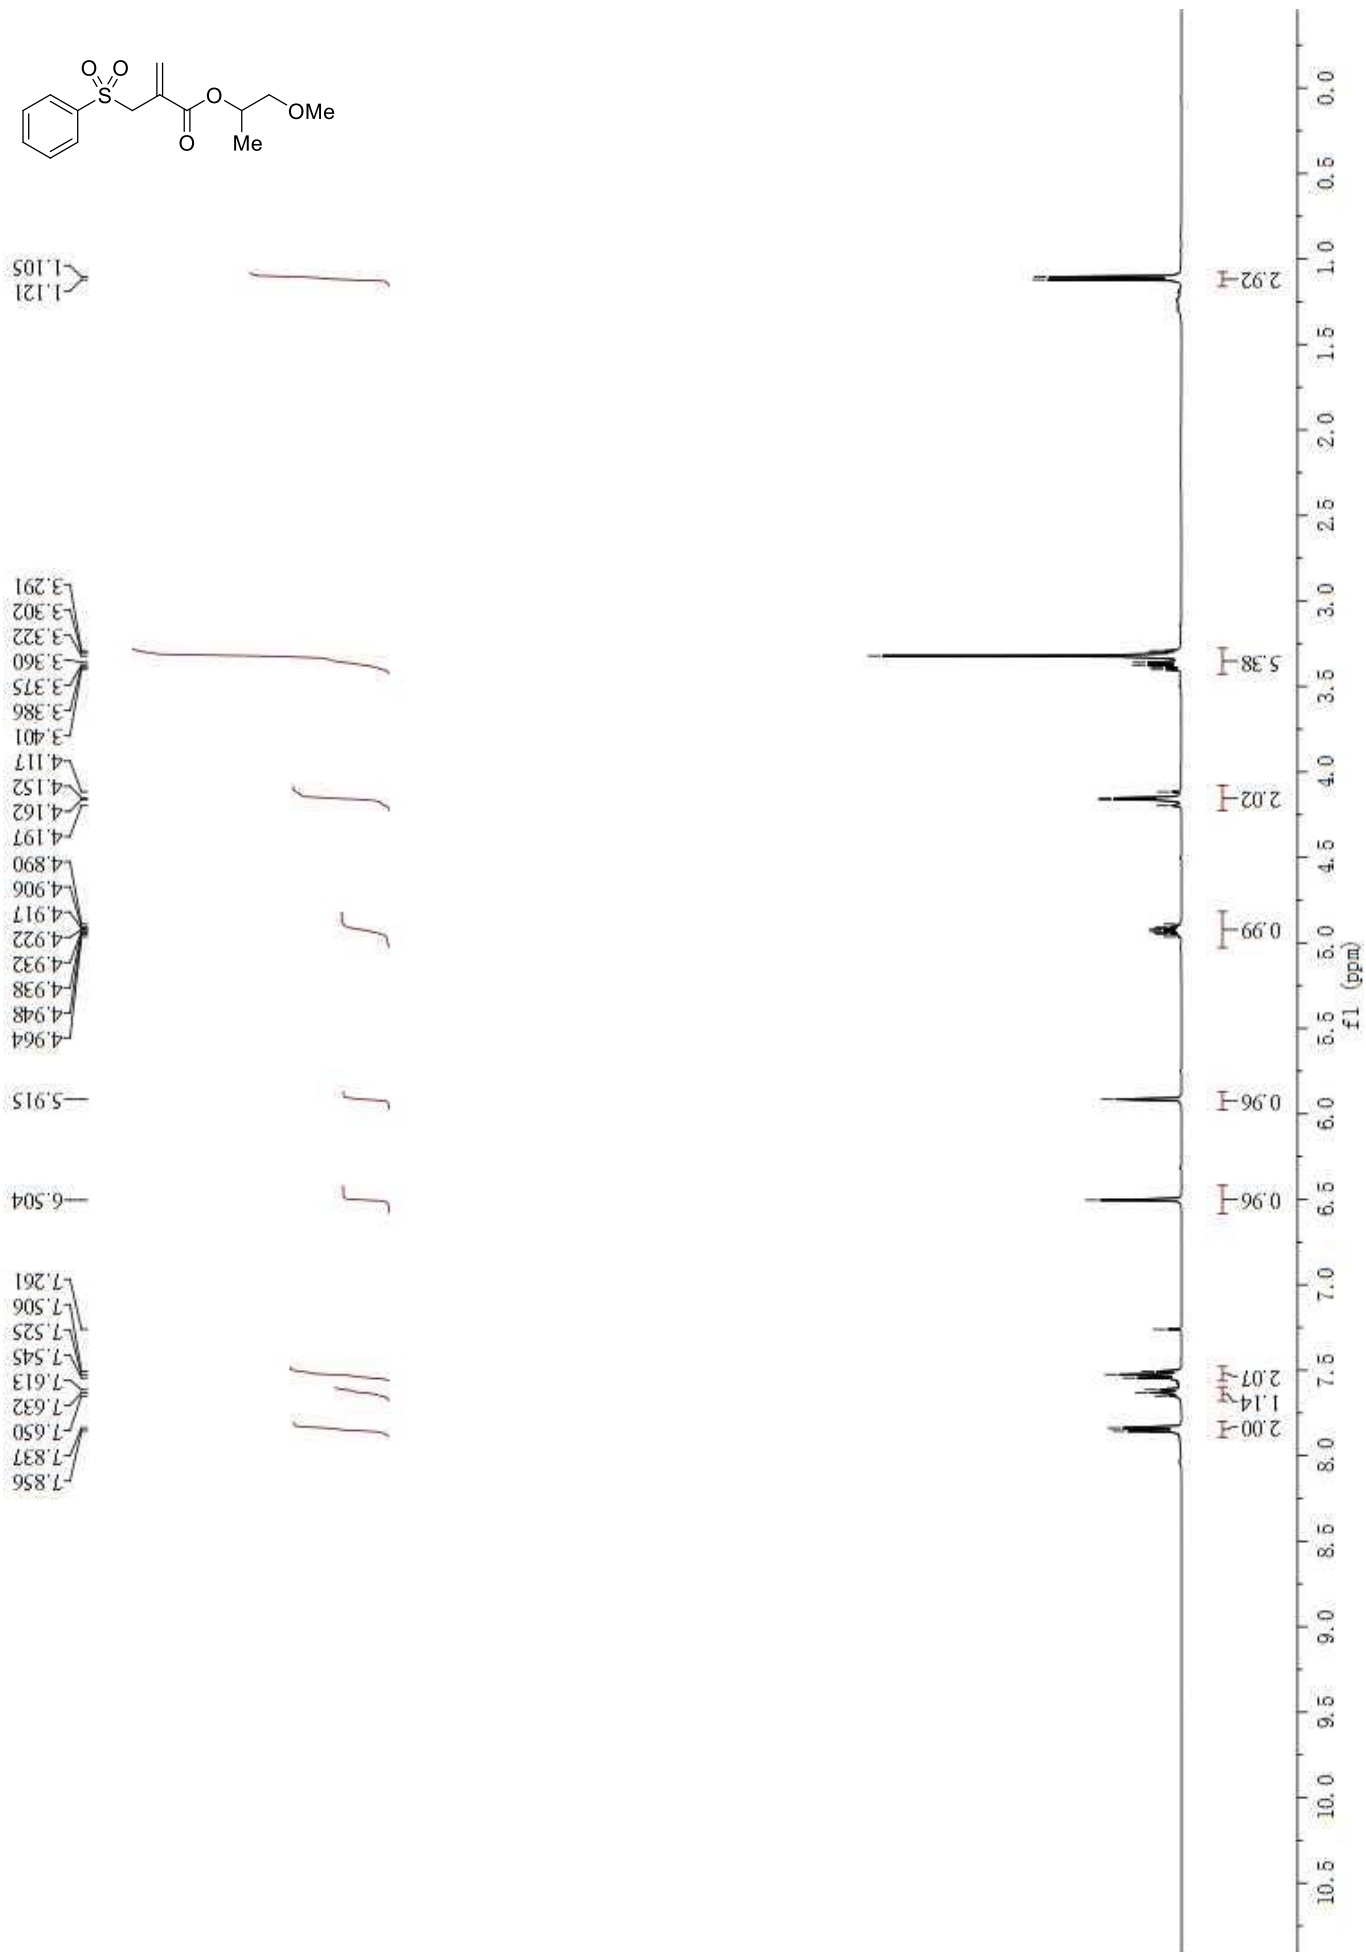



$^{13}\text{C}$  NMR of **7r** ( $\text{CDCl}_3$ , 100 MHz, 25 °C)

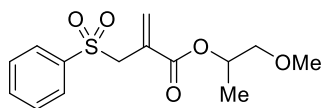

16.436

57.441  
59.231  
70.839  
74.772  
76.843  
77.160  
77.478

128.857  
129.125  
129.176  
133.622  
133.960  
138.393

164.401

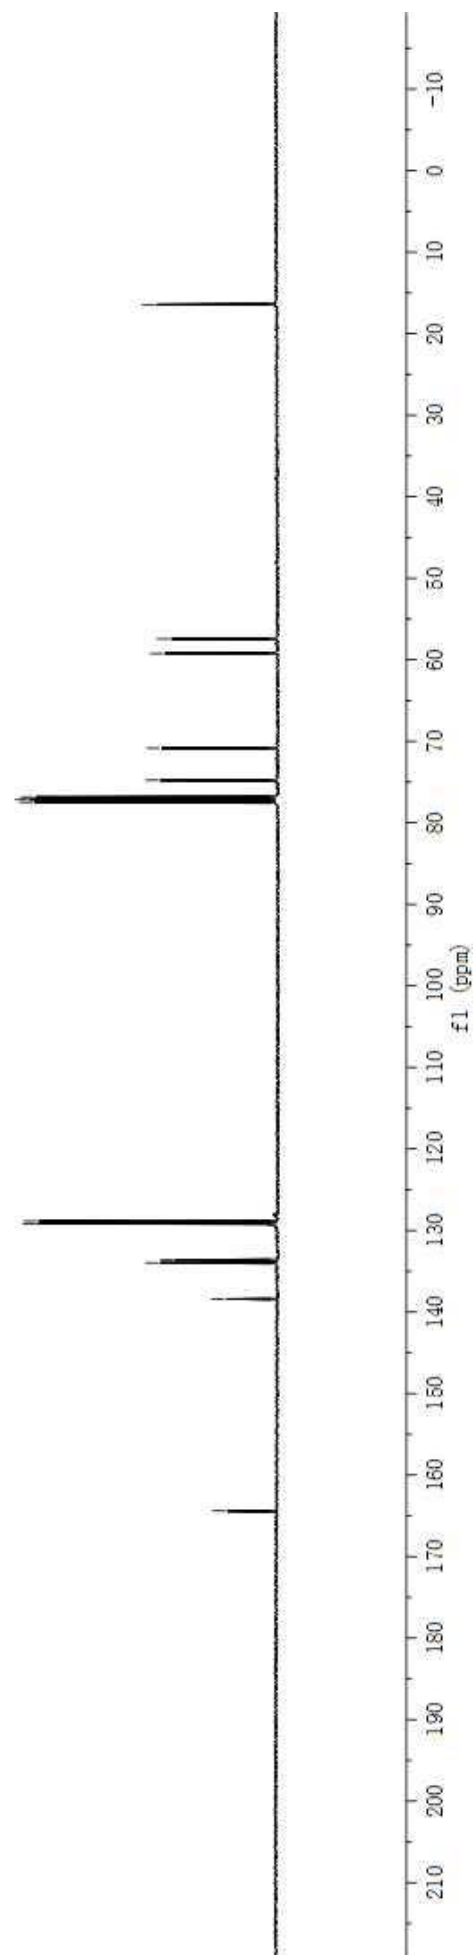

<sup>1</sup>H NMR of **7s** (CDCl<sub>3</sub>, 400 MHz, 25 °C)

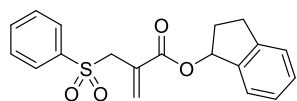

3.063  
3.046  
3.043  
2.883  
2.875  
2.862  
2.441  
2.423  
2.404  
1.987  
1.975  
1.953  
1.942  
1.930  
1.920  
1.907

4.169

6.491  
6.081  
6.071  
6.064  
6.054  
5.910

7.845  
7.826  
7.618  
7.600  
7.517  
7.498  
7.479  
7.307  
7.288  
7.269  
7.261  
7.228  
7.211

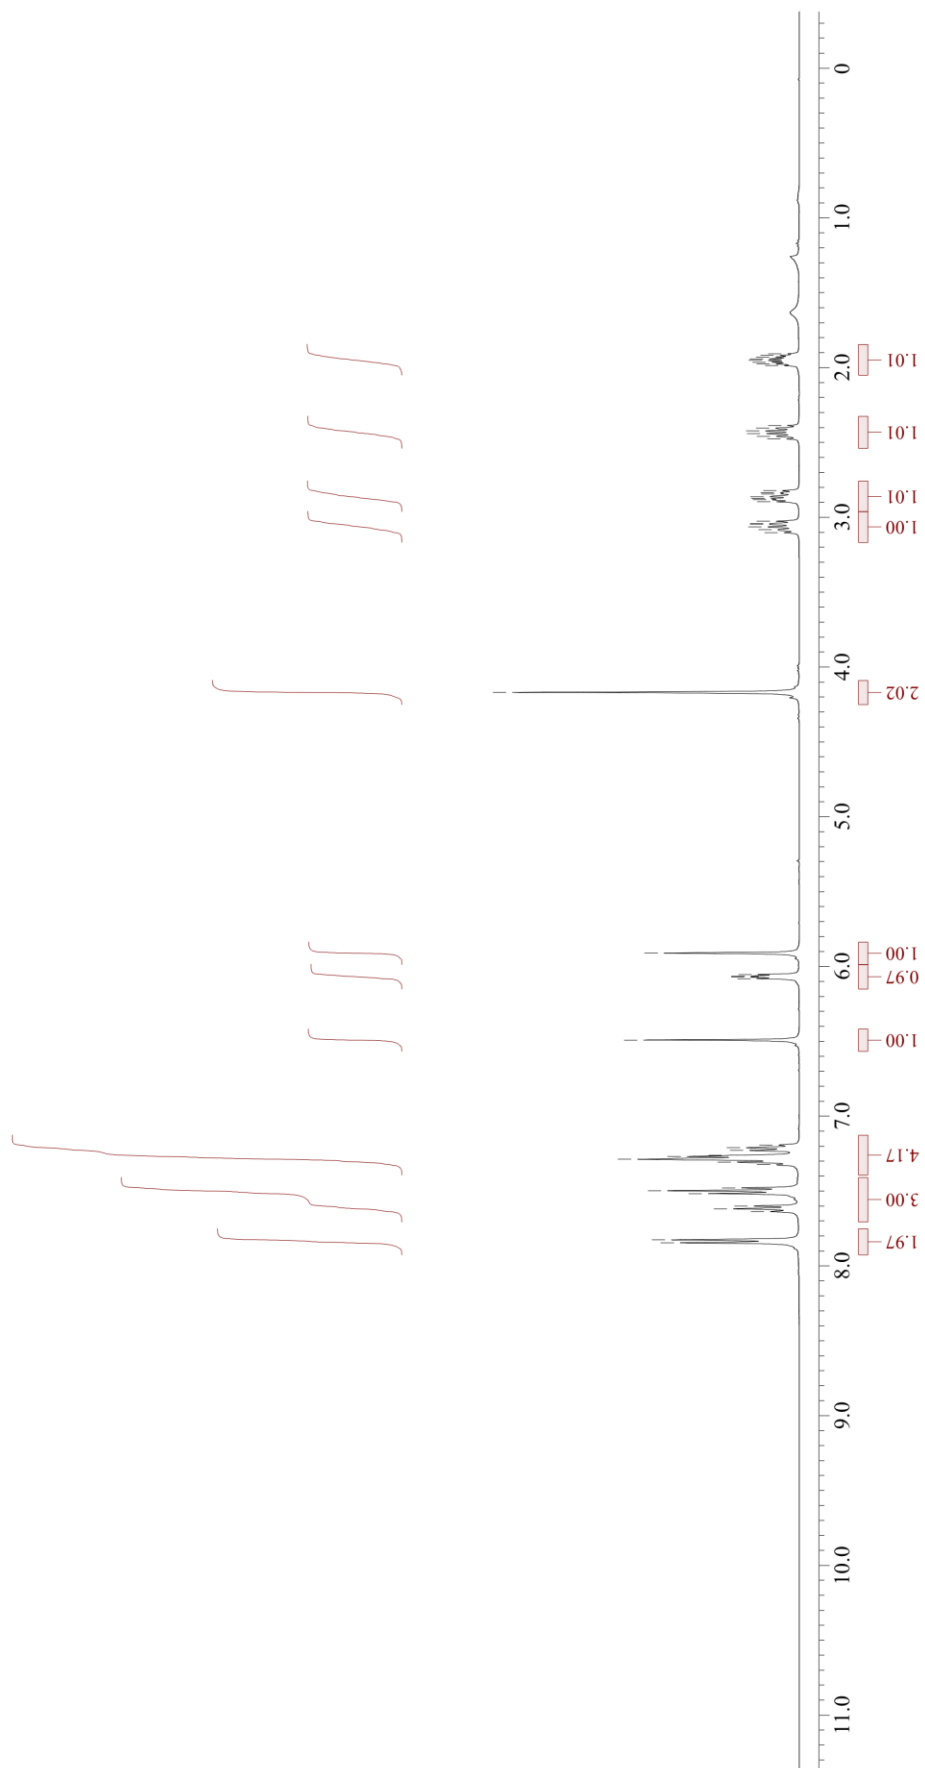

$^{13}\text{C}$  NMR of **7s** ( $\text{CDCl}_3$ , 100 MHz, 25 °C)

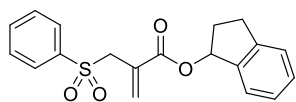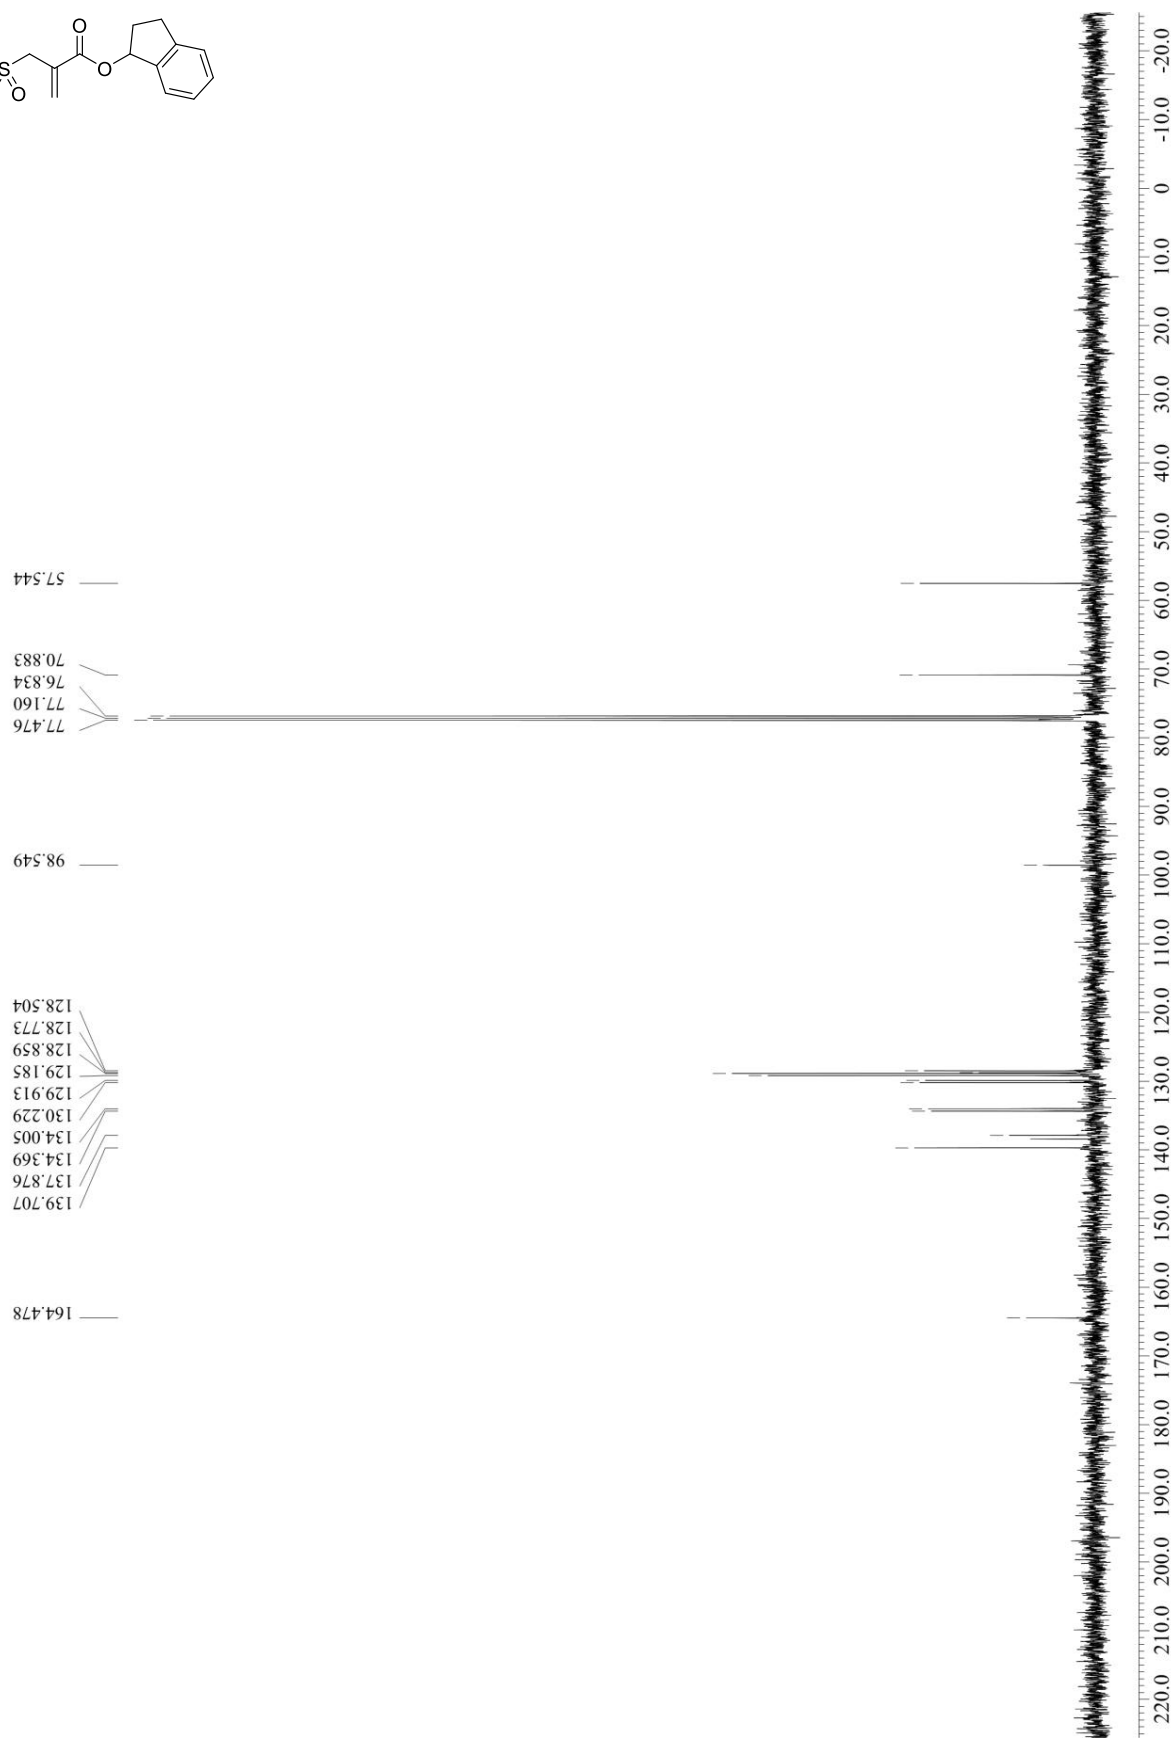

$^1\text{H NMR}$  of **7t** ( $\text{CDCl}_3$ , 400 MHz, 25  $^\circ\text{C}$ )

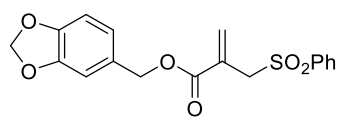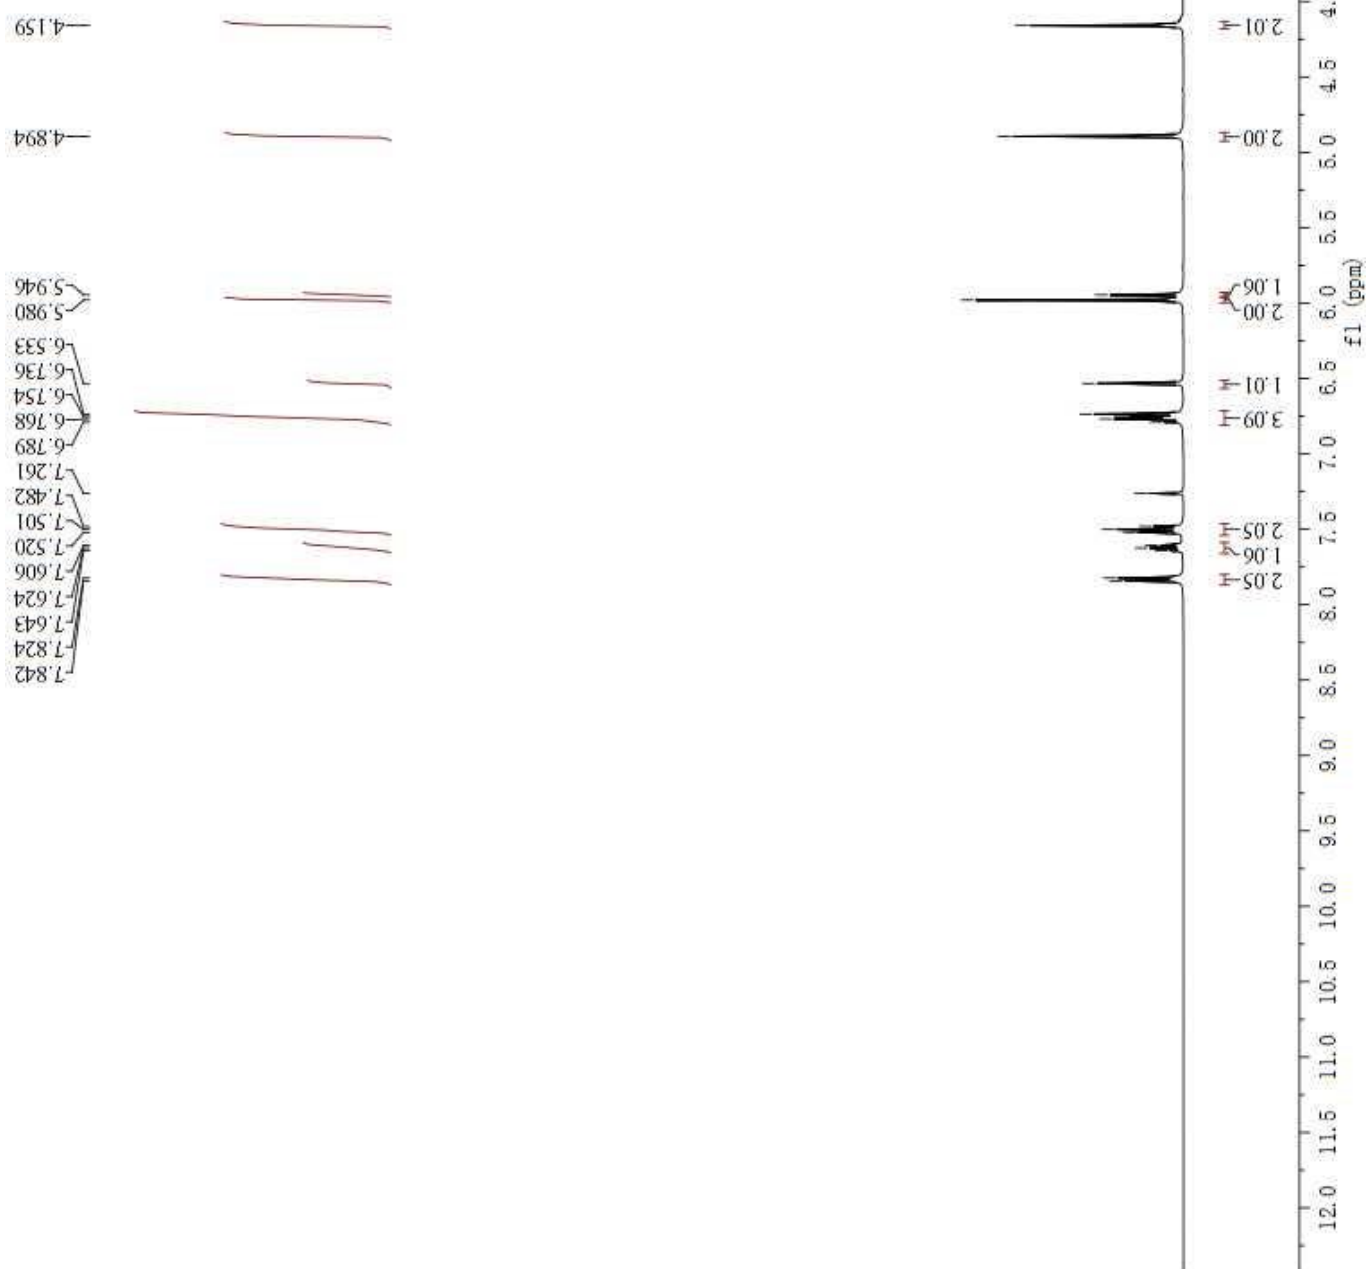

$^{13}\text{C}$  NMR of **7t** ( $\text{CDCl}_3$ , 100 MHz, 25 °C)

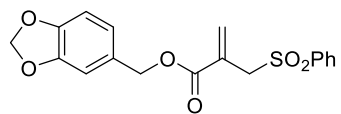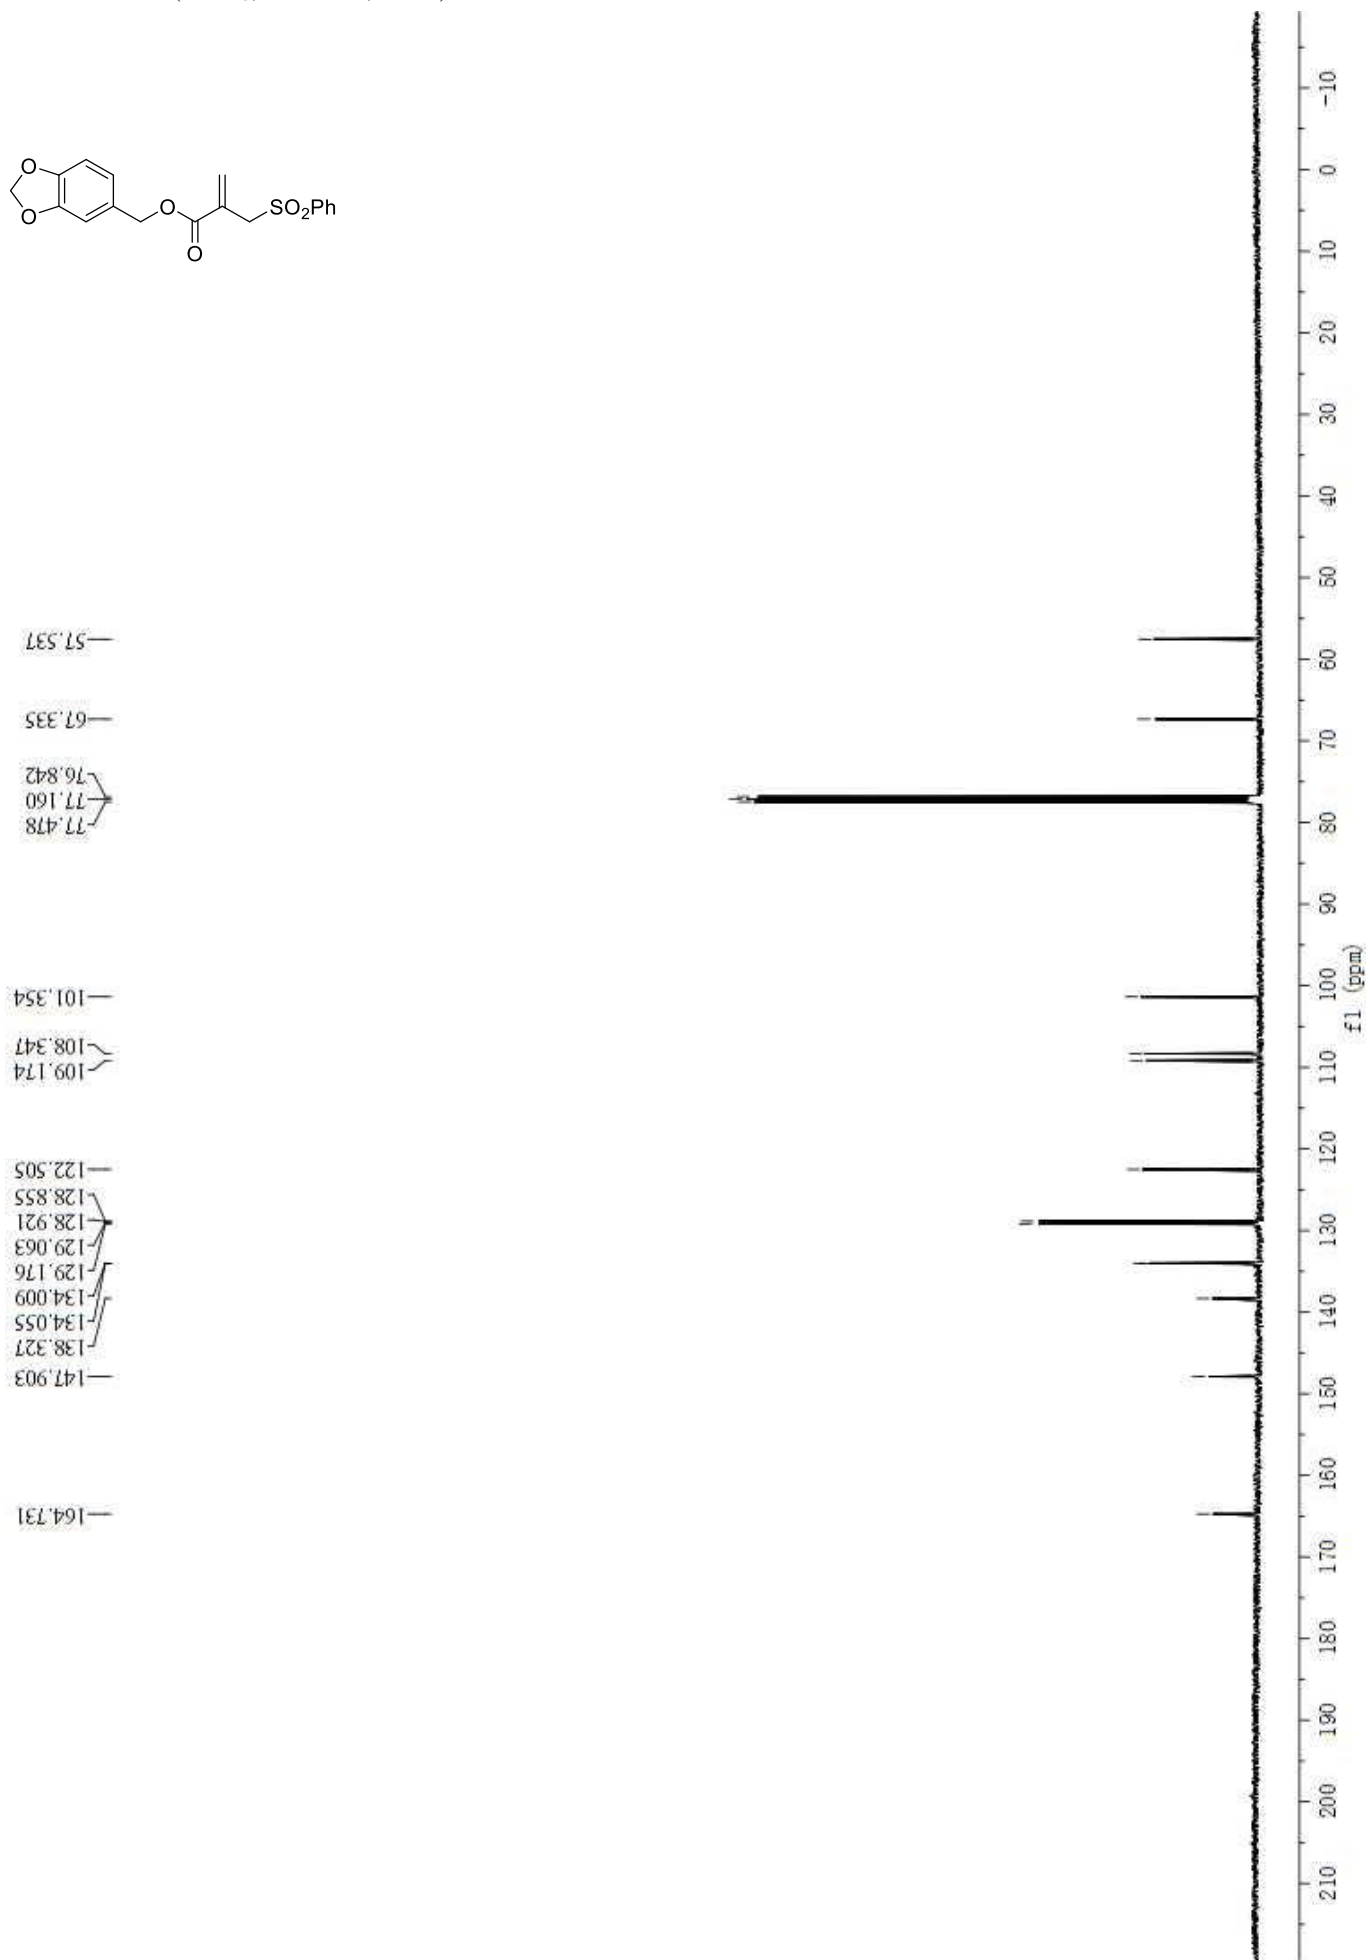

$^1\text{H}$  NMR of **7u** ( $\text{CDCl}_3$ , 400 MHz, 25 °C)

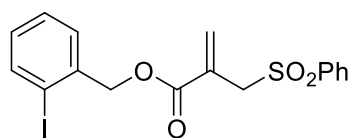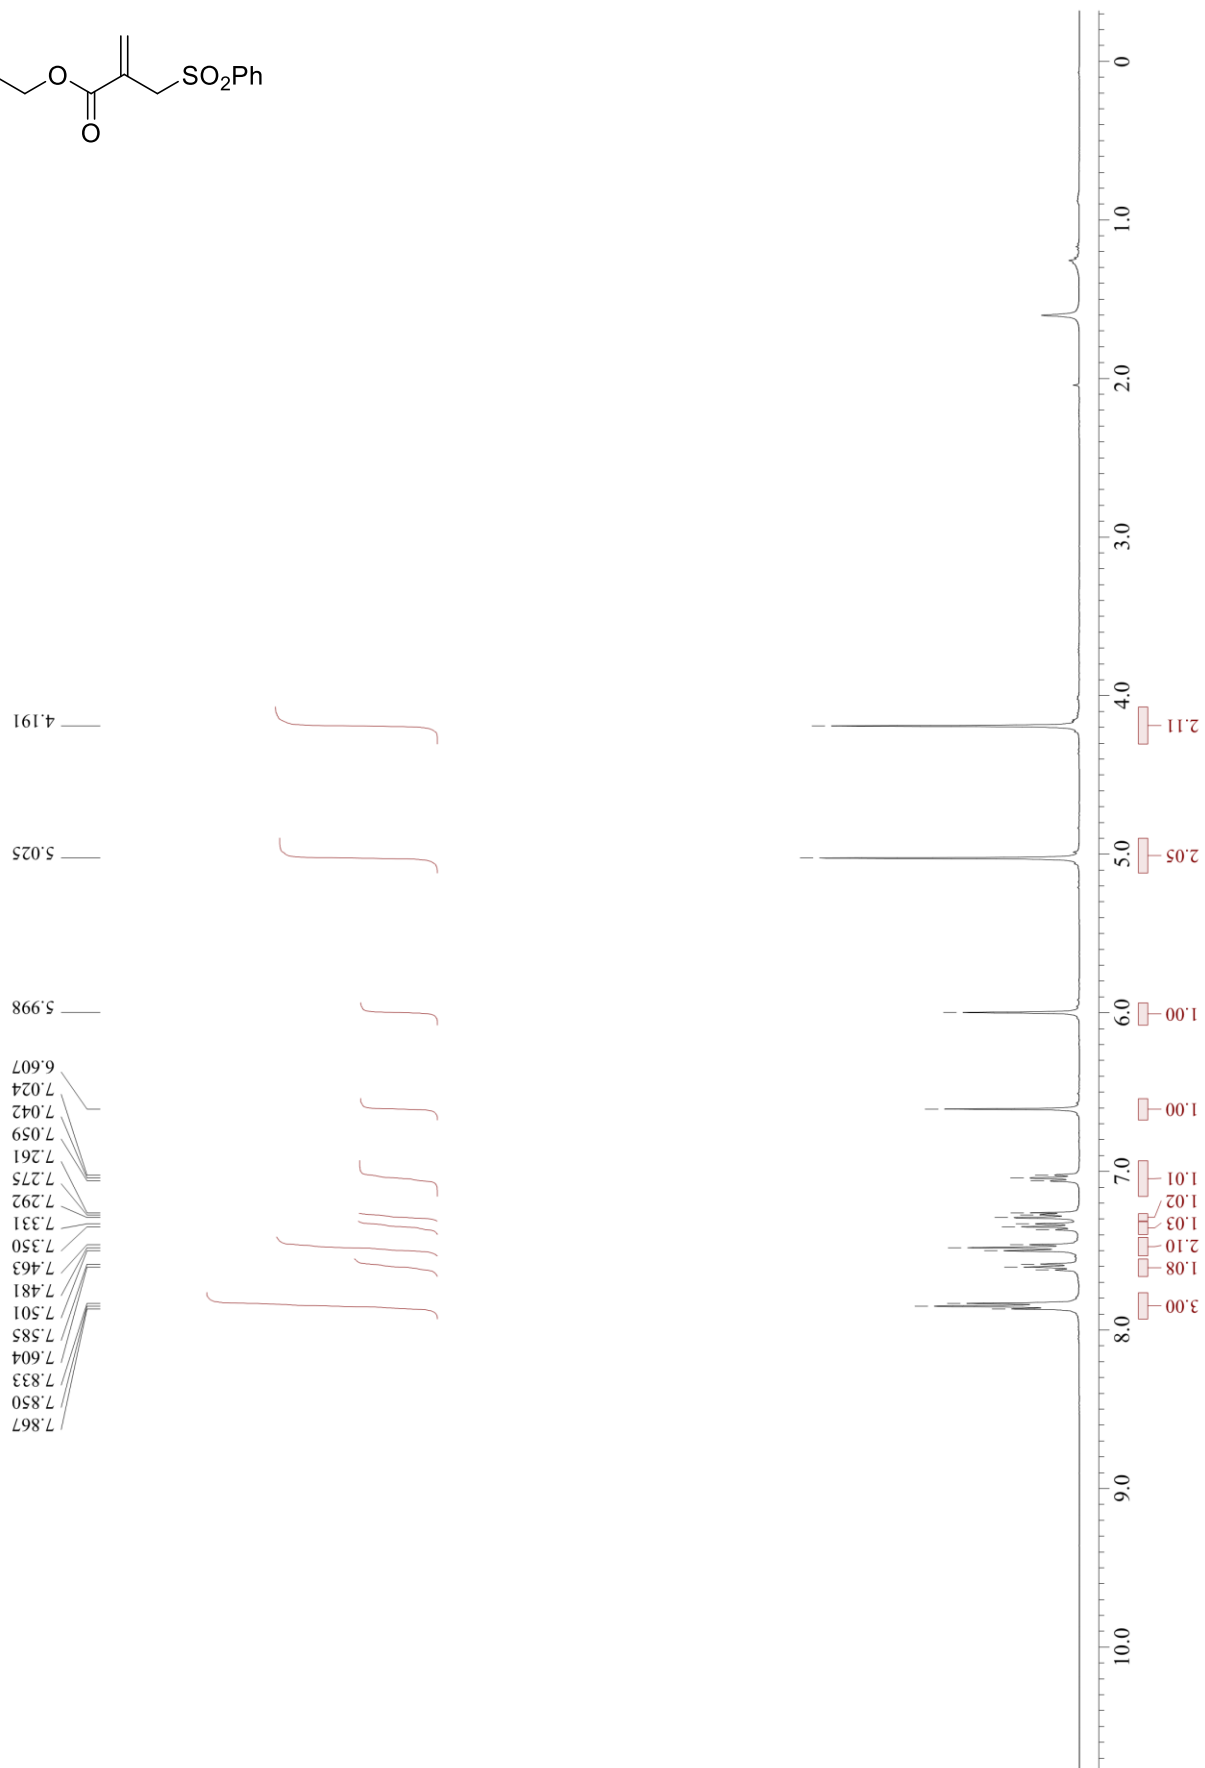

$^{13}\text{C}$  NMR of **7u** ( $\text{CDCl}_3$ , 100 MHz, 25 °C)

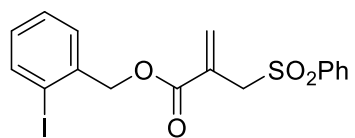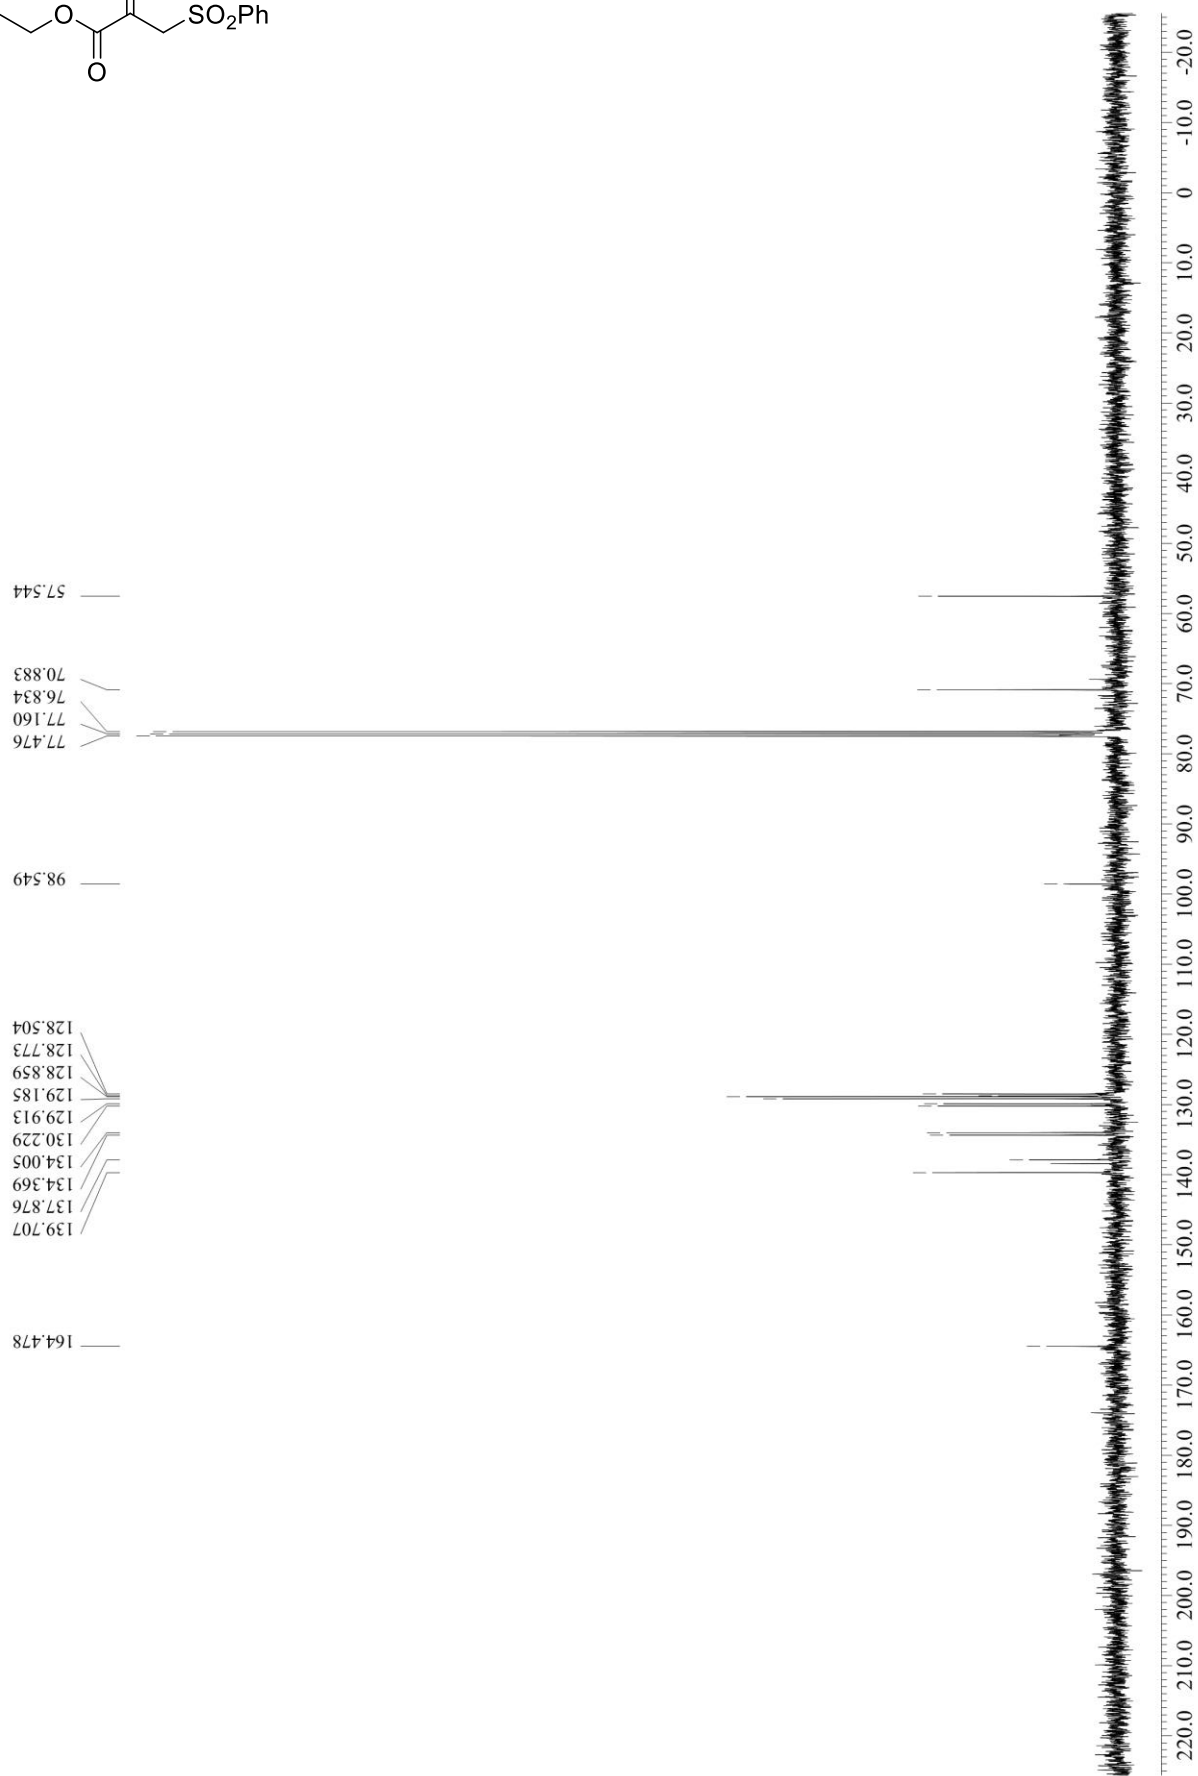

<sup>1</sup>H NMR of **7v** (CDCl<sub>3</sub>, 400 MHz, 25 °C)

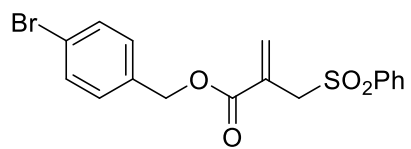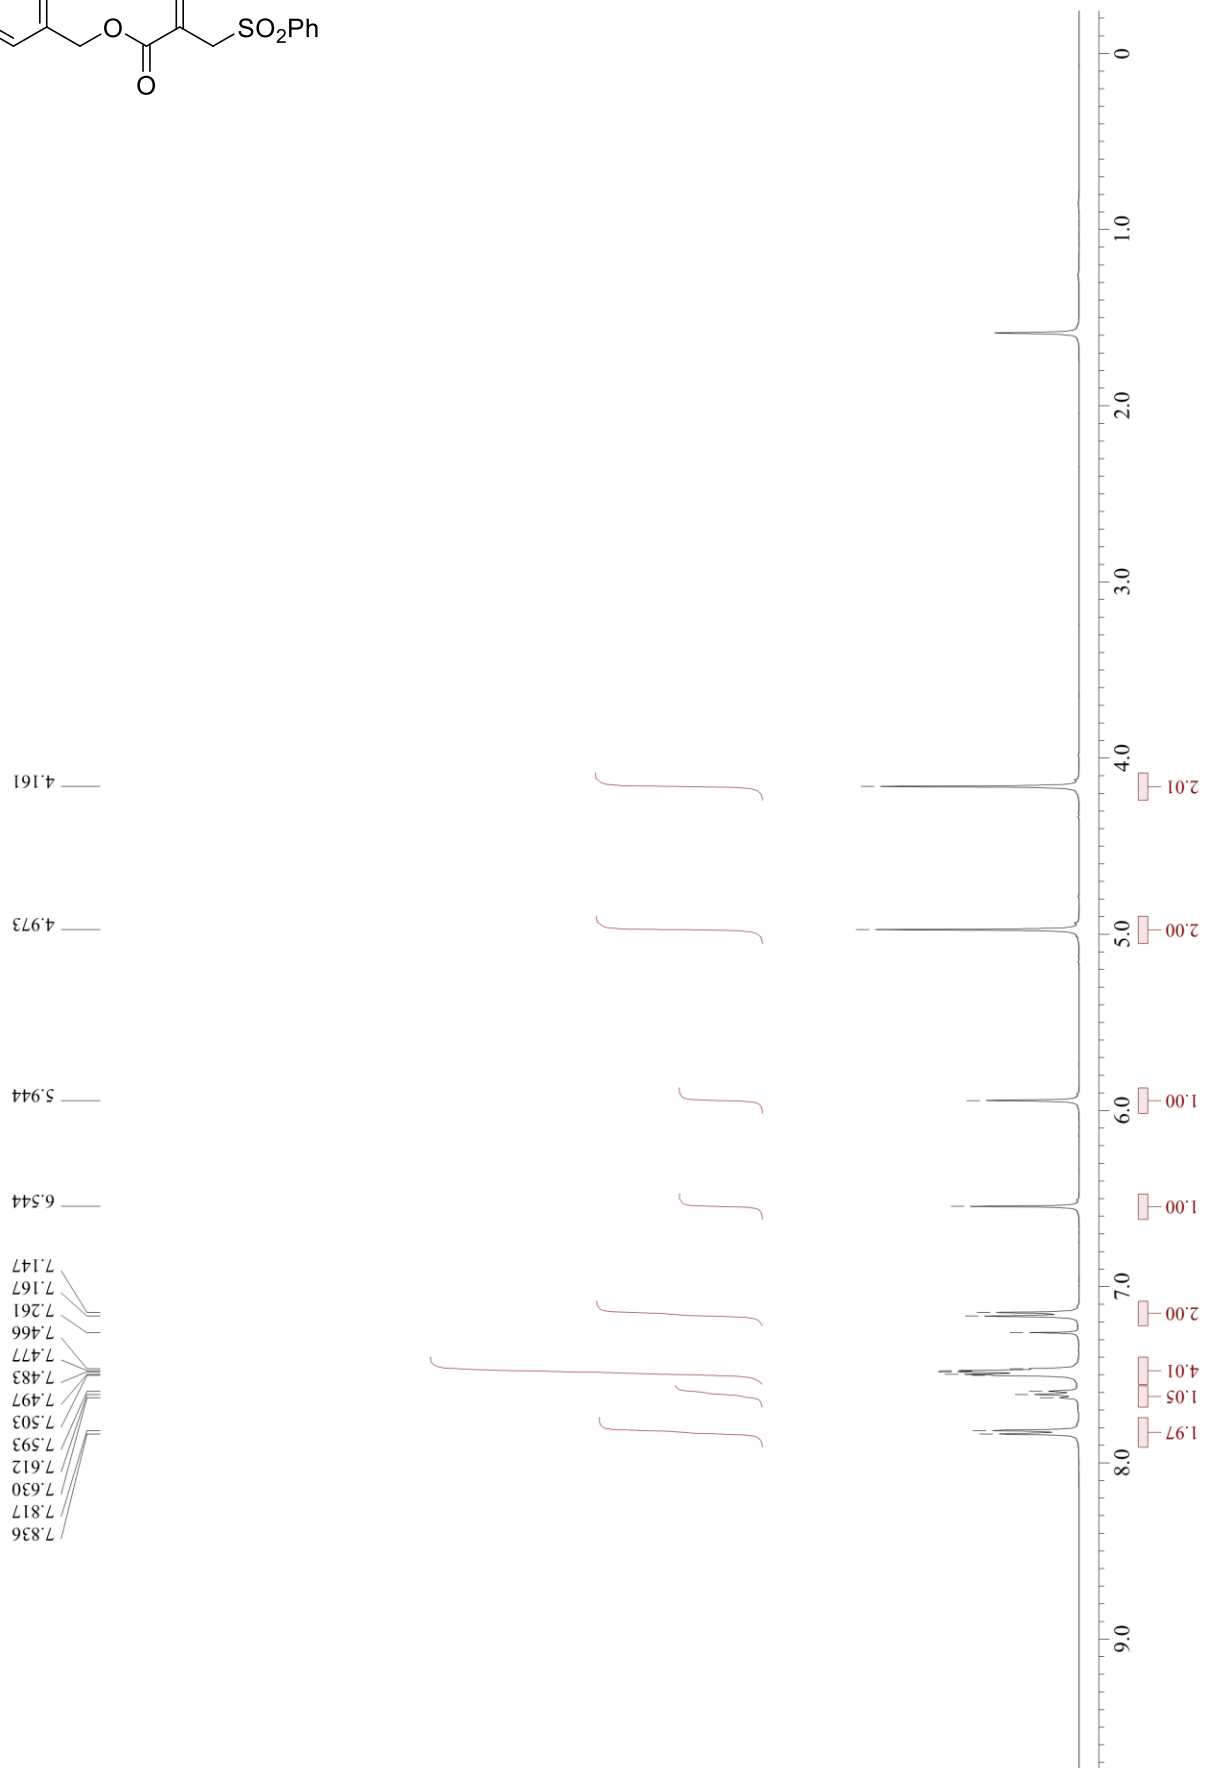



$^{13}\text{C}$  NMR of **7v** ( $\text{CDCl}_3$ , 100 MHz, 25 °C)

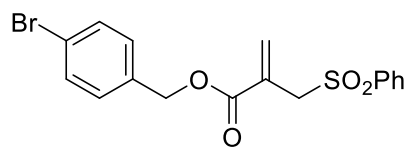

57.458

66.561

76.844

77.160

77.476

122.640

128.821

128.849

129.175

130.076

131.897

134.024

134.158

134.426

138.403

164.670

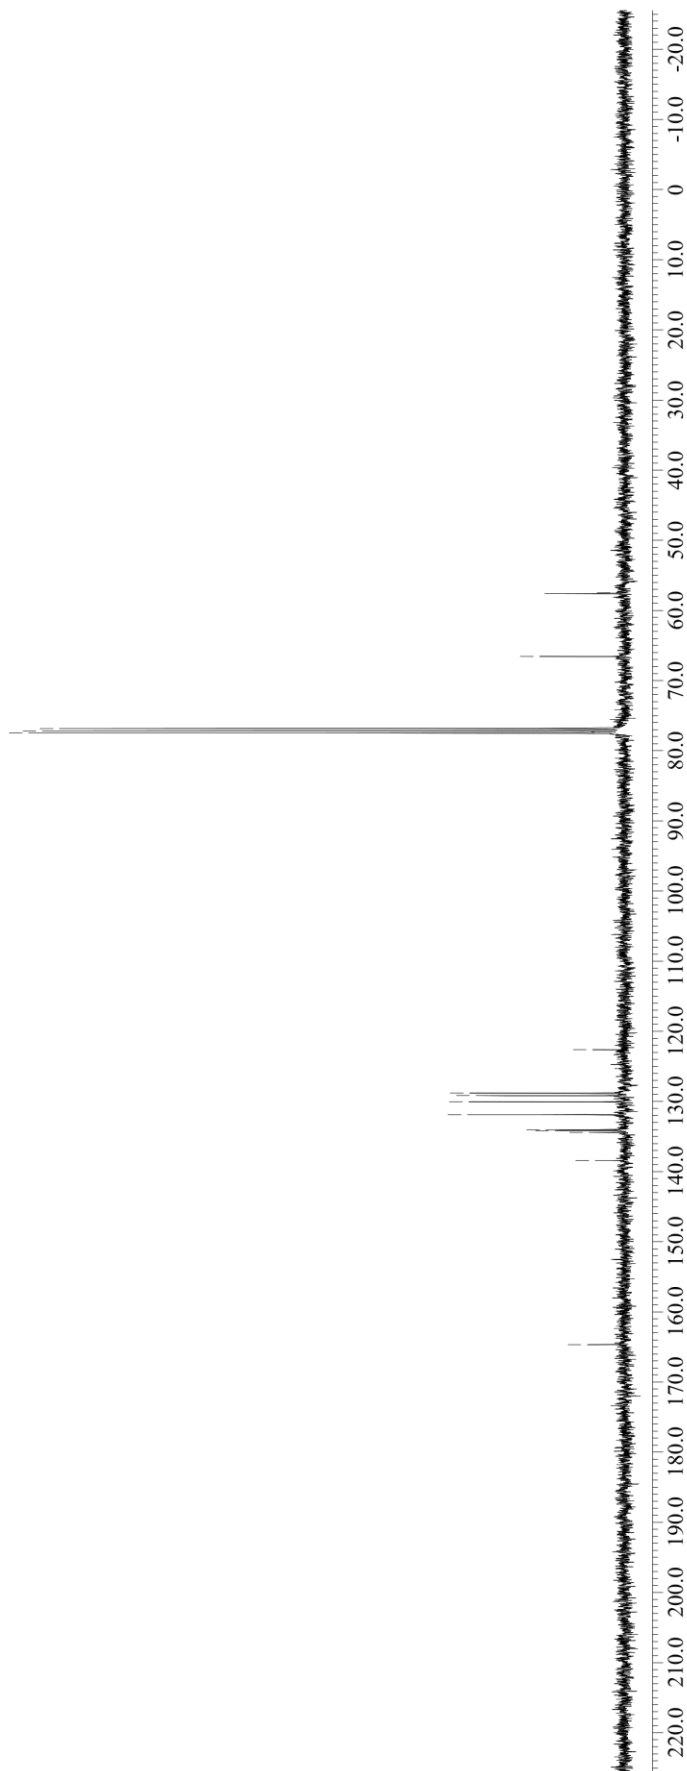

$^1\text{H NMR}$  of **7x** ( $\text{CDCl}_3$ , 400 MHz, 25 °C)

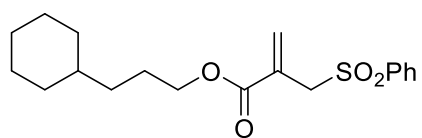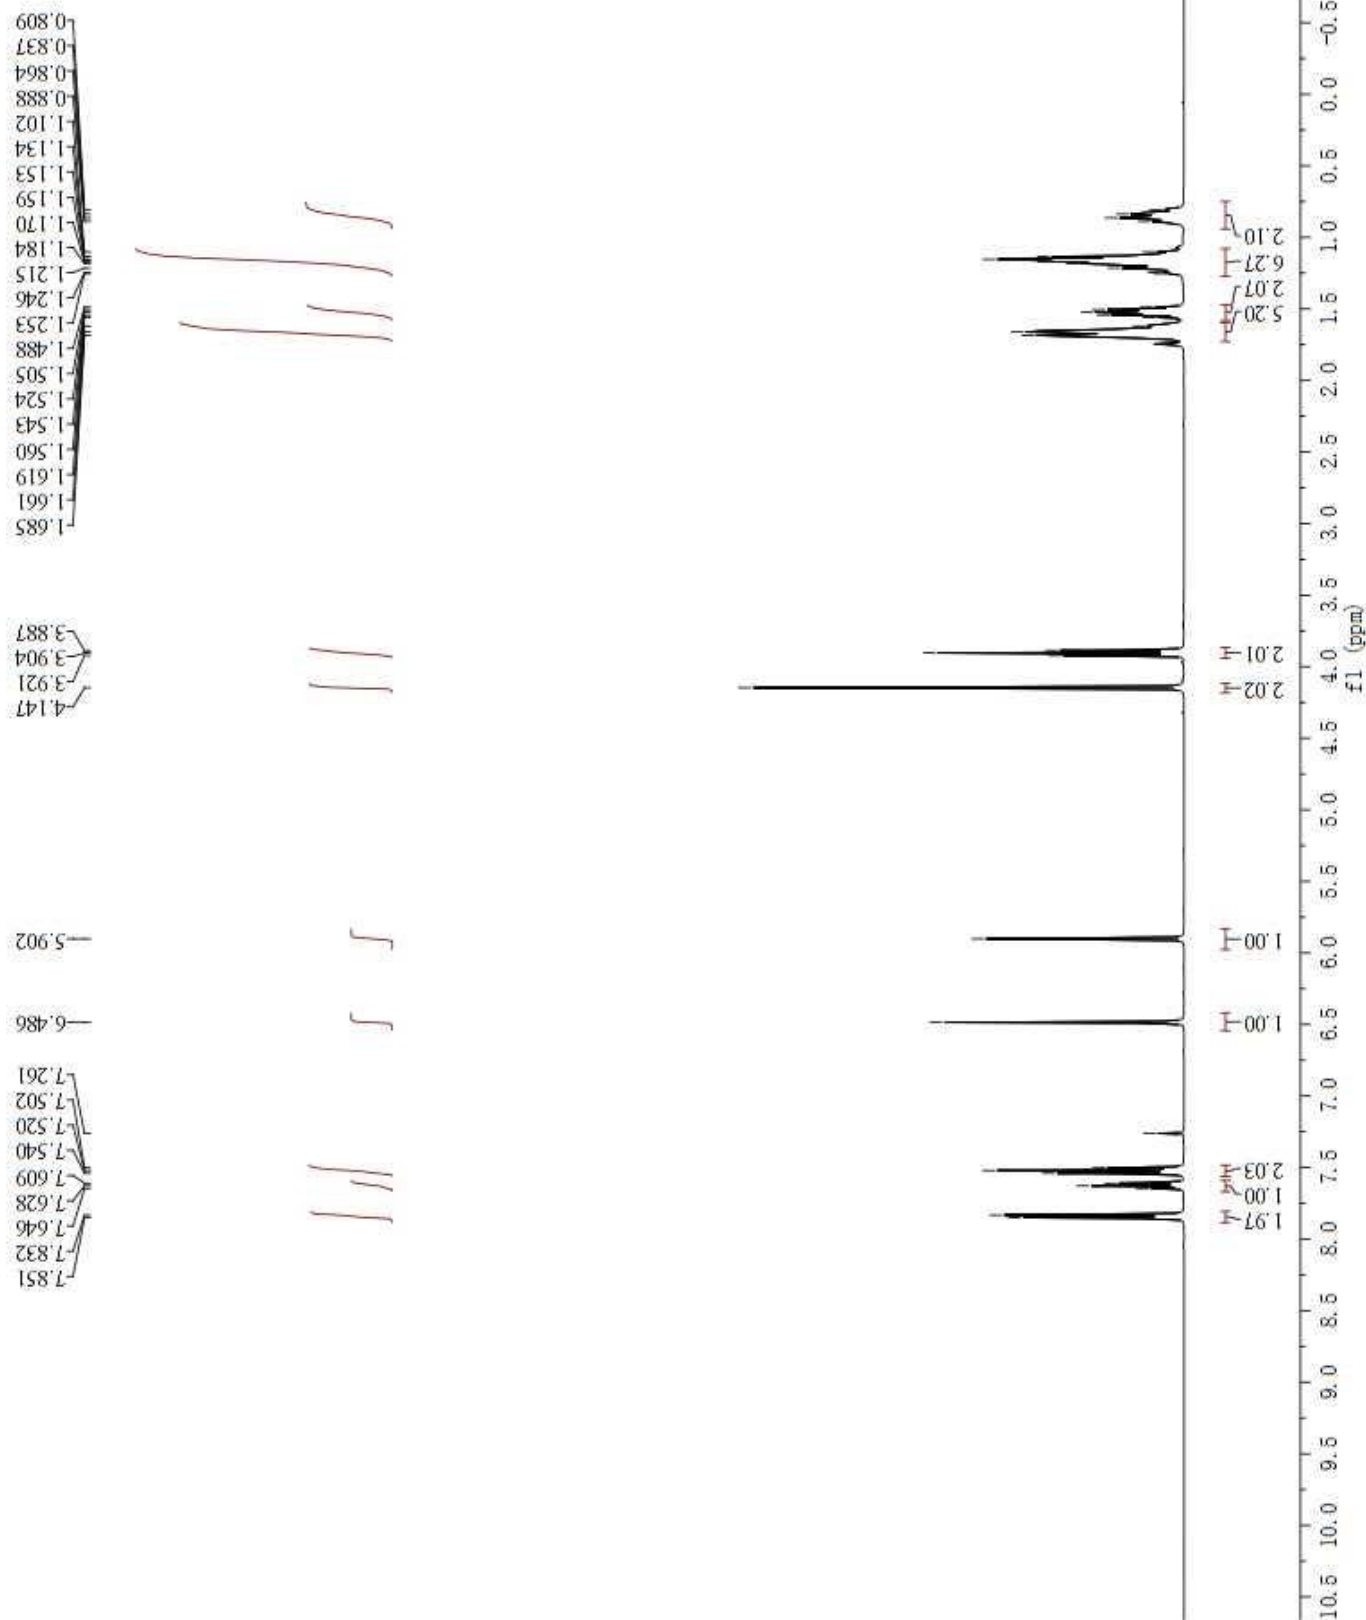

$^{13}\text{C}$  NMR of **7x** ( $\text{CDCl}_3$ , 100 MHz, 25 °C)

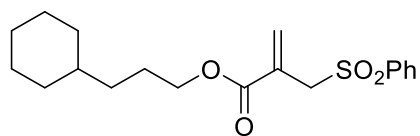

25.810  
26.379  
26.660  
33.316  
33.512  
37.323

57.550

66.072

76.842  
77.160  
77.477

128.839  
129.129  
133.443  
133.945  
138.390

164.885

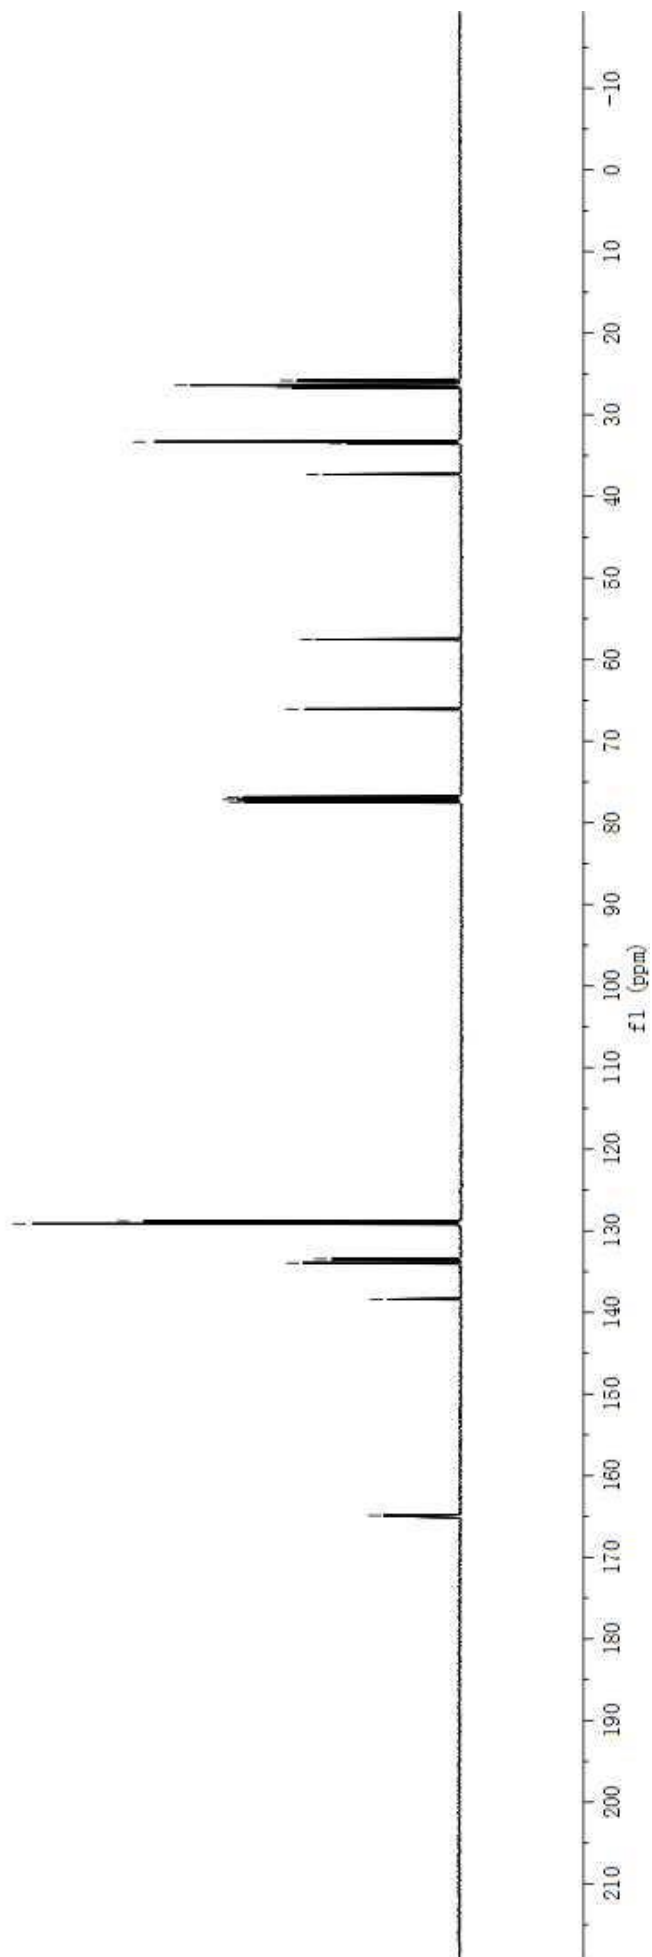

$^1\text{H}$  NMR of **7y** ( $\text{CDCl}_3$ , 400 MHz, 25 °C)

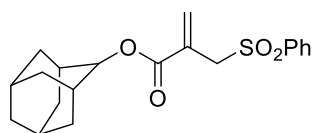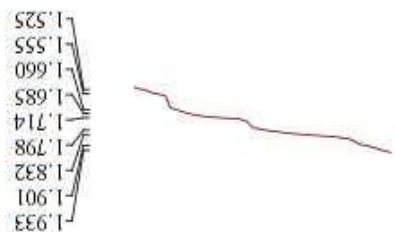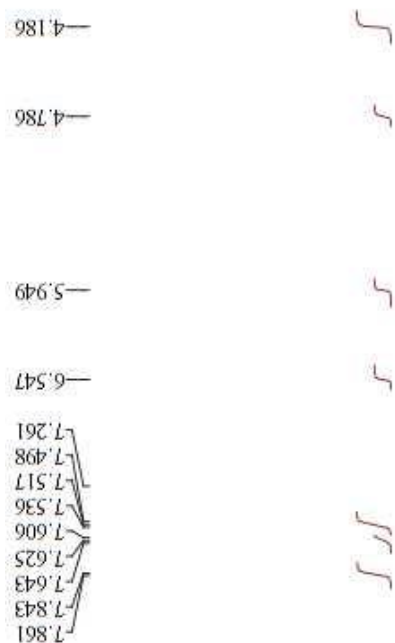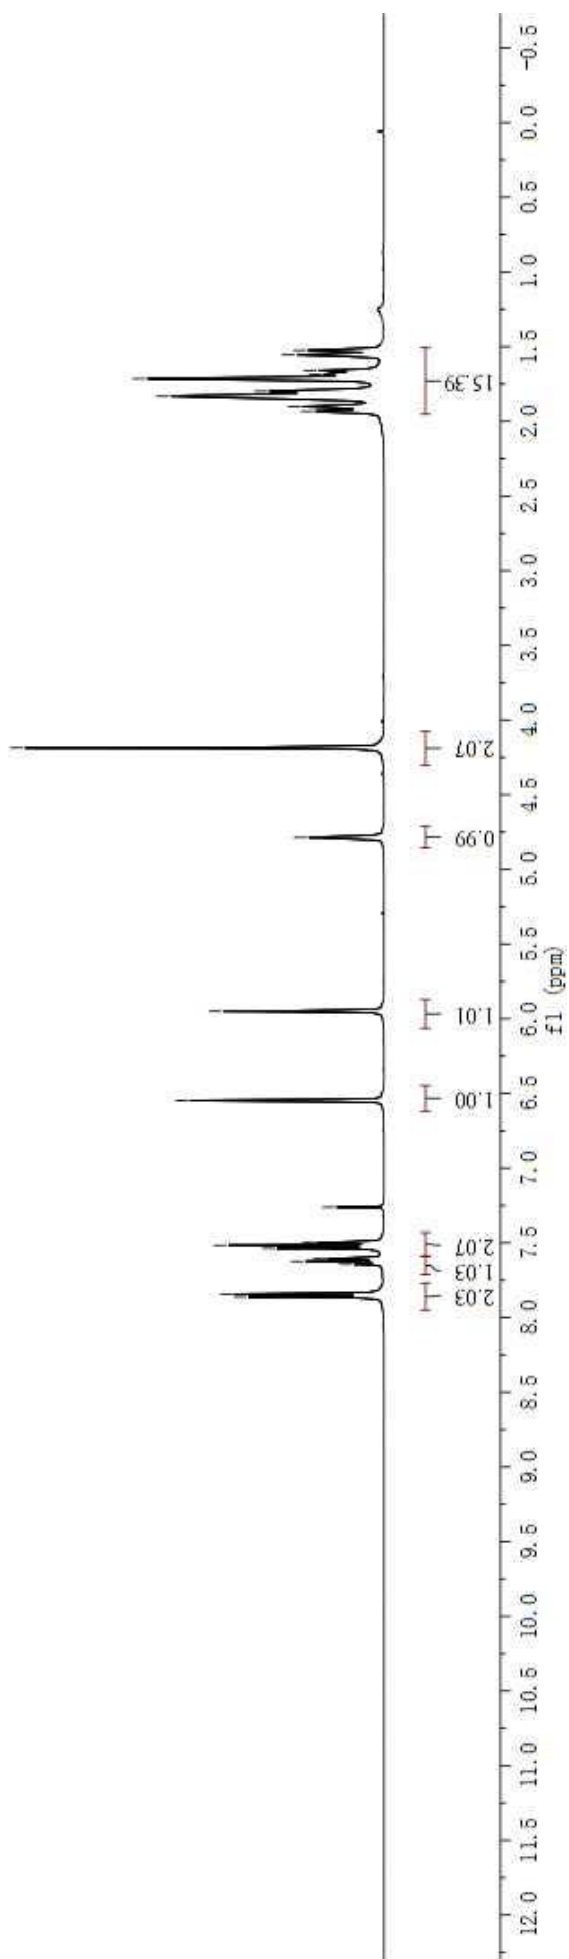

$^{13}\text{C}$  NMR of **7y** ( $\text{CDCl}_3$ , 100 MHz, 25 °C)

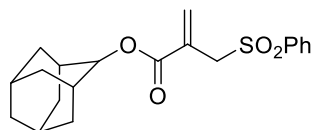

37.323  
36.278  
31.984  
31.731  
27.213  
26.930

57.419

78.492  
77.477  
77.160  
76.842

138.403  
133.941  
133.155  
129.609  
129.143  
128.862

164.140

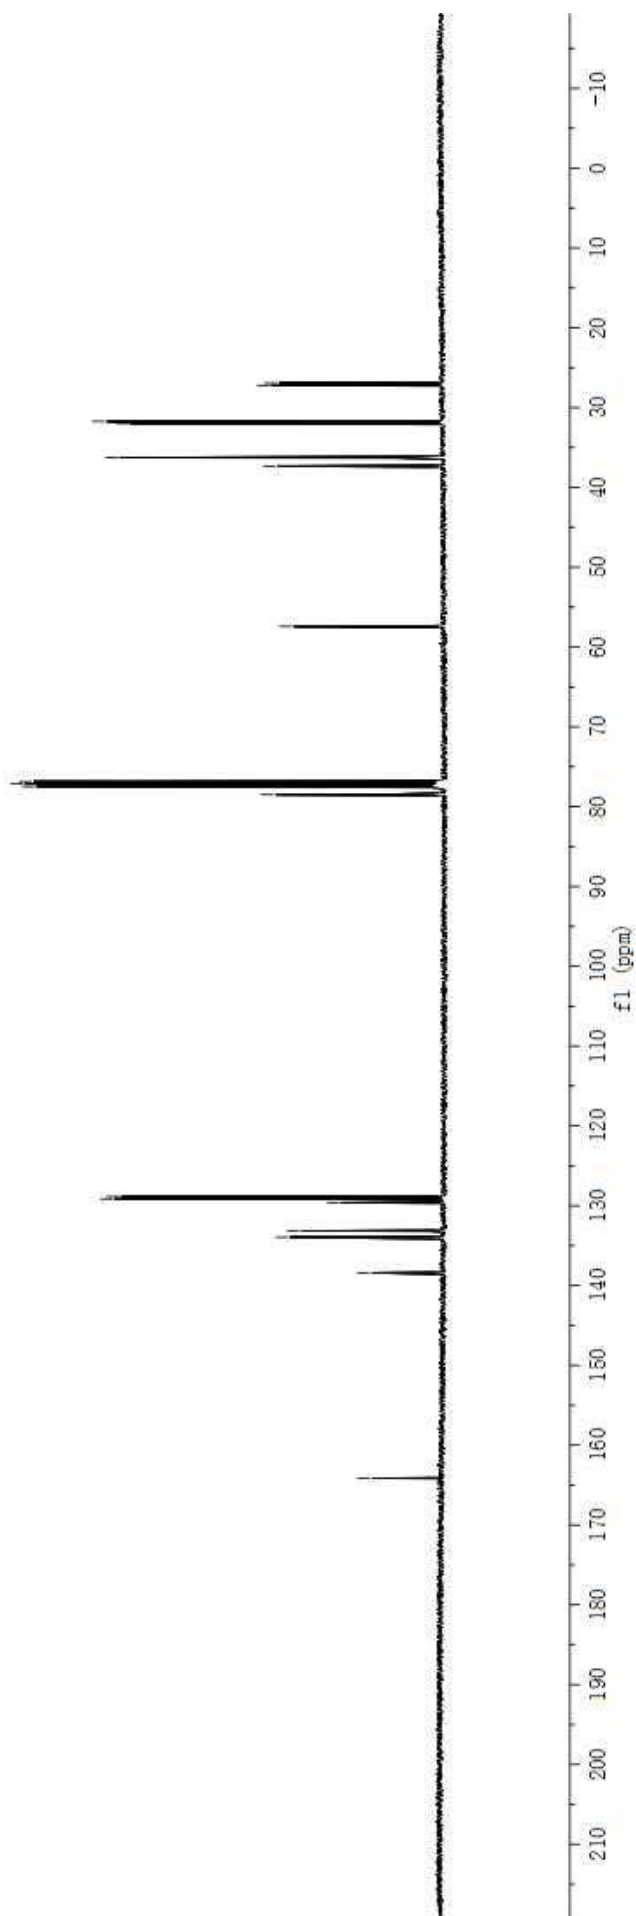

$^1\text{H}$  NMR of **7z** ( $\text{CDCl}_3$ , 400 MHz, 25  $^\circ\text{C}$ )

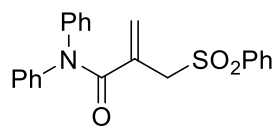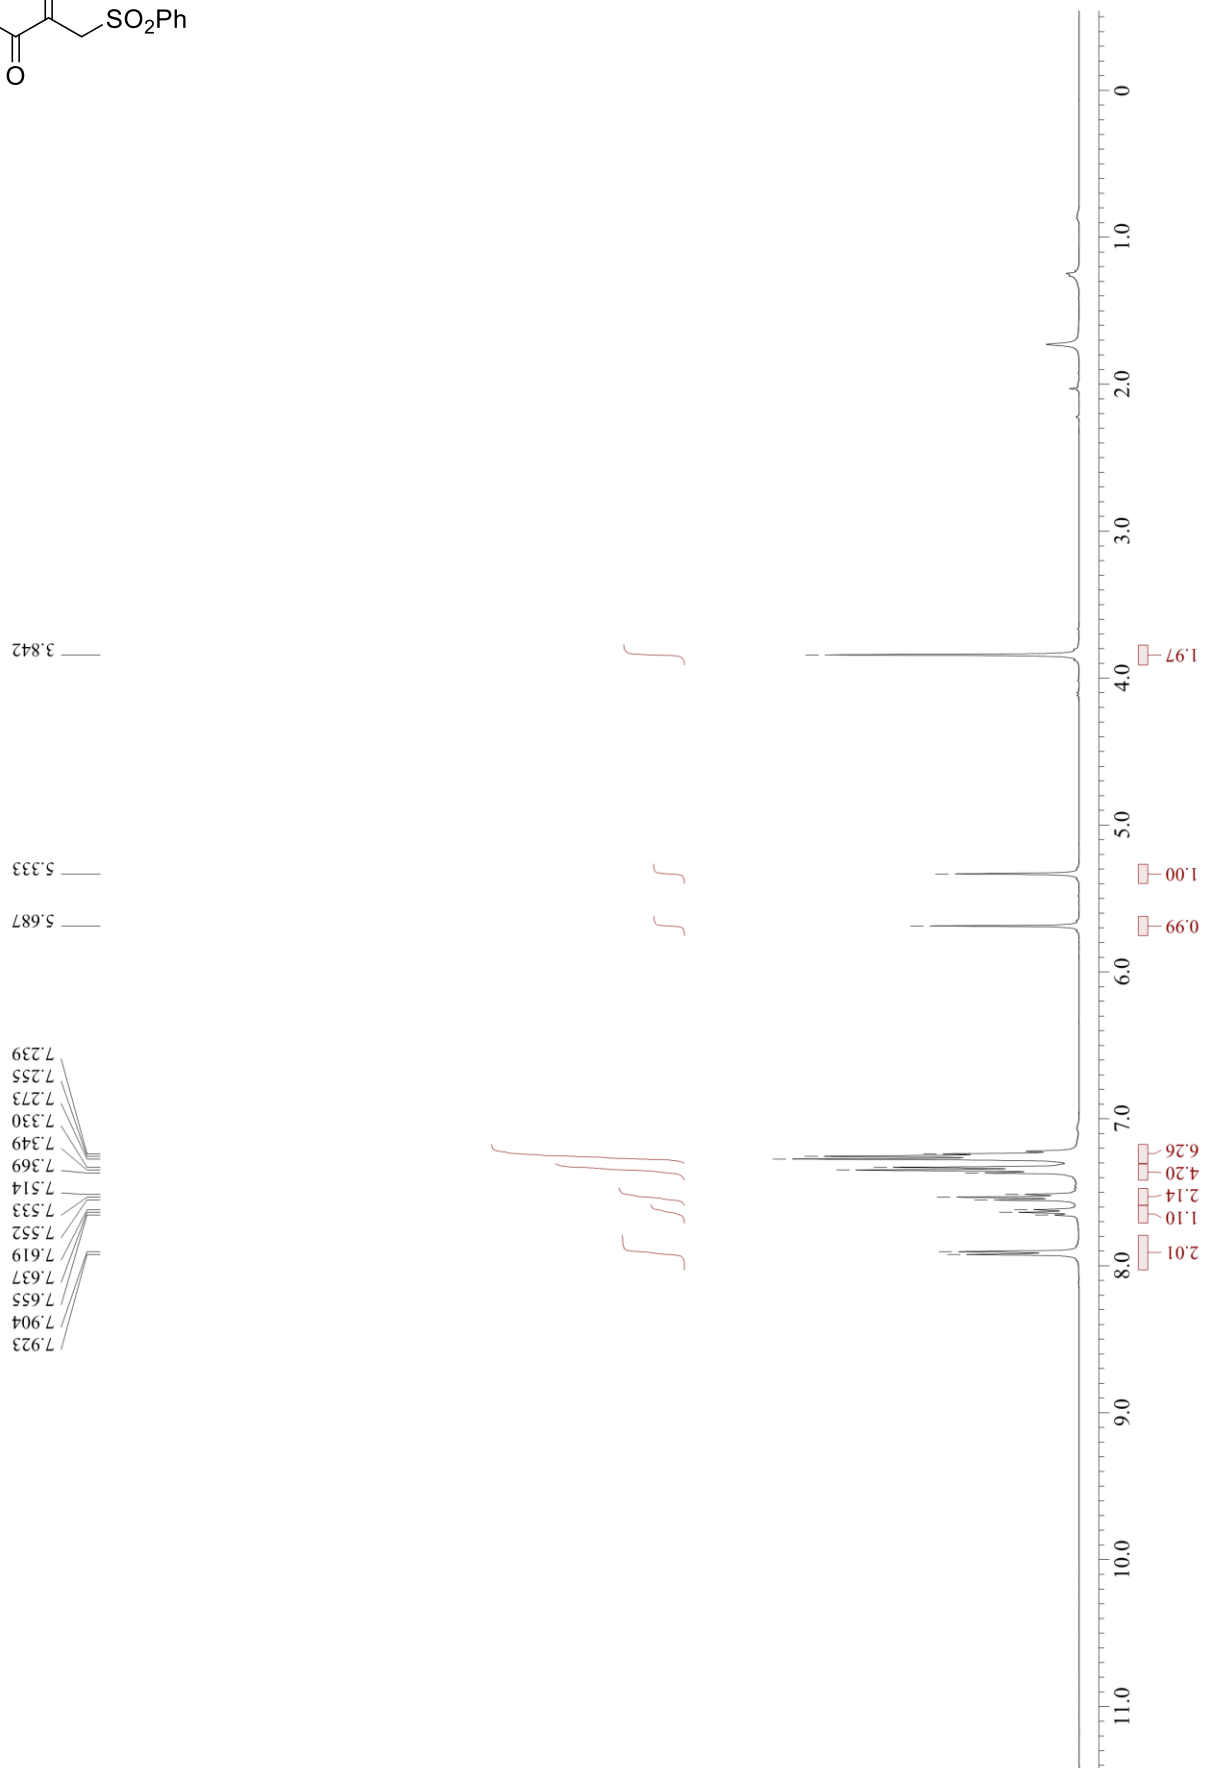

$^{13}\text{C}$  NMR of **7z**( $\text{CDCl}_3$ , 100 MHz, 25 °C)

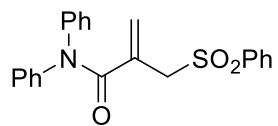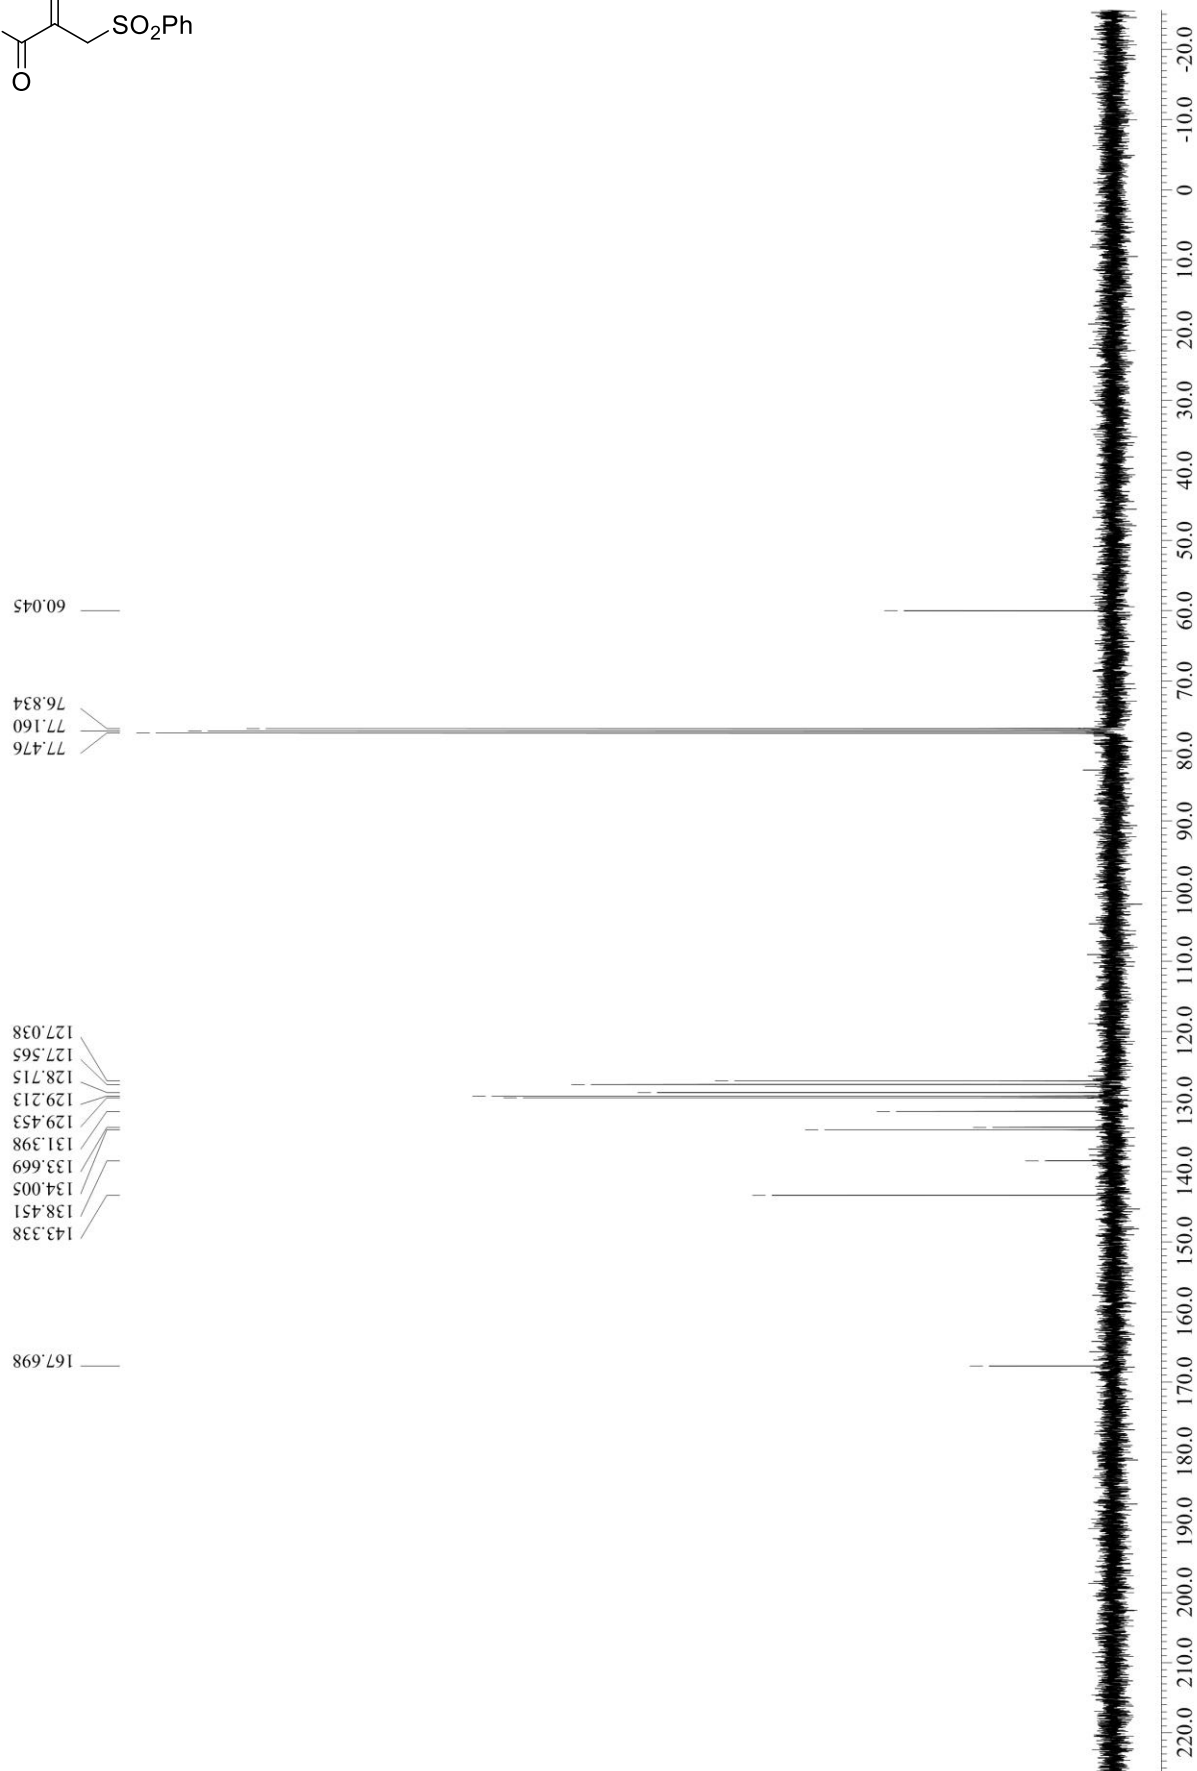

$^1\text{H}$  NMR of **7ae** ( $\text{CDCl}_3$ , 400 MHz, 25  $^\circ\text{C}$ )

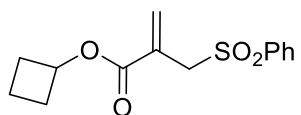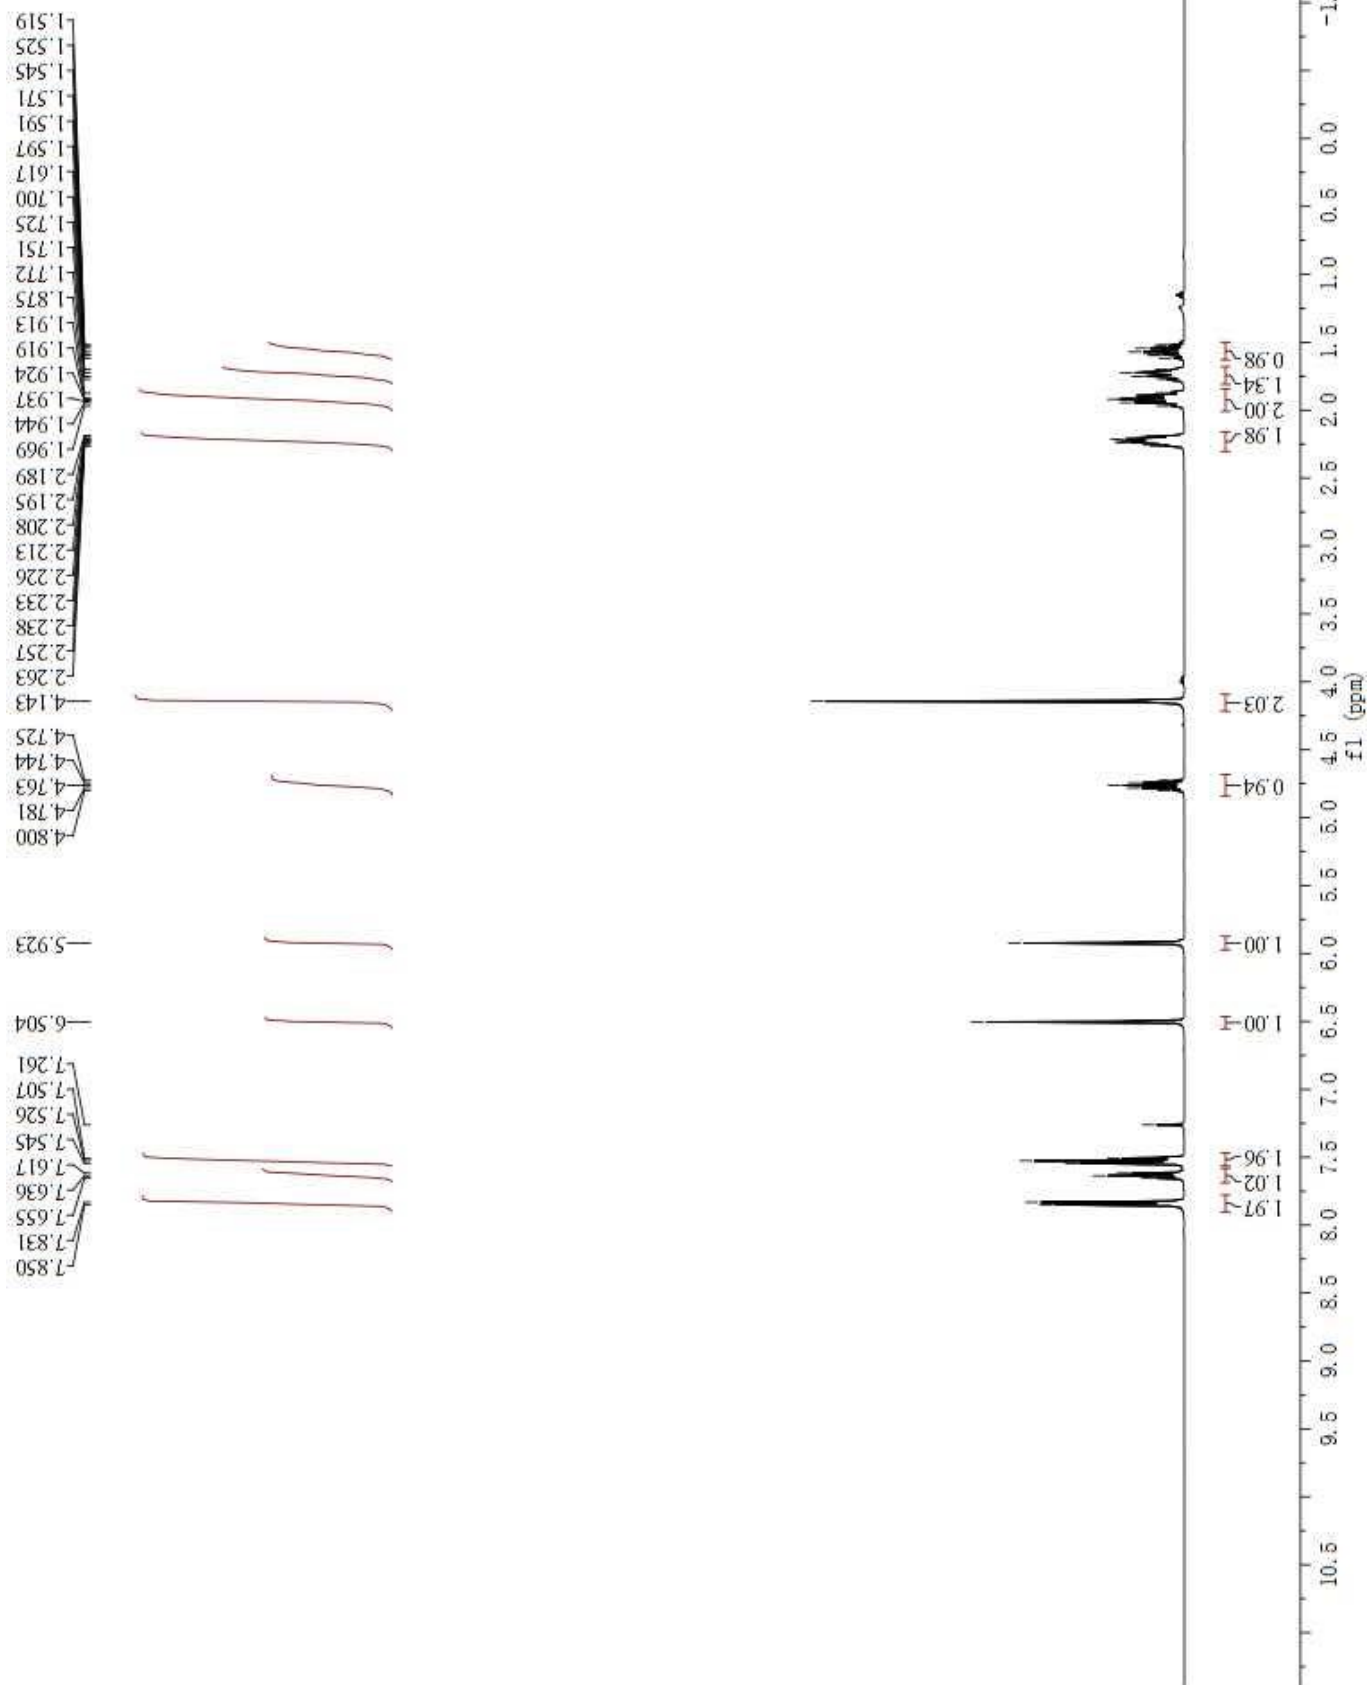



$^{13}\text{C}$  NMR of **7ae** ( $\text{CDCl}_3$ , 100 MHz, 25  $^\circ\text{C}$ )

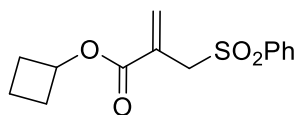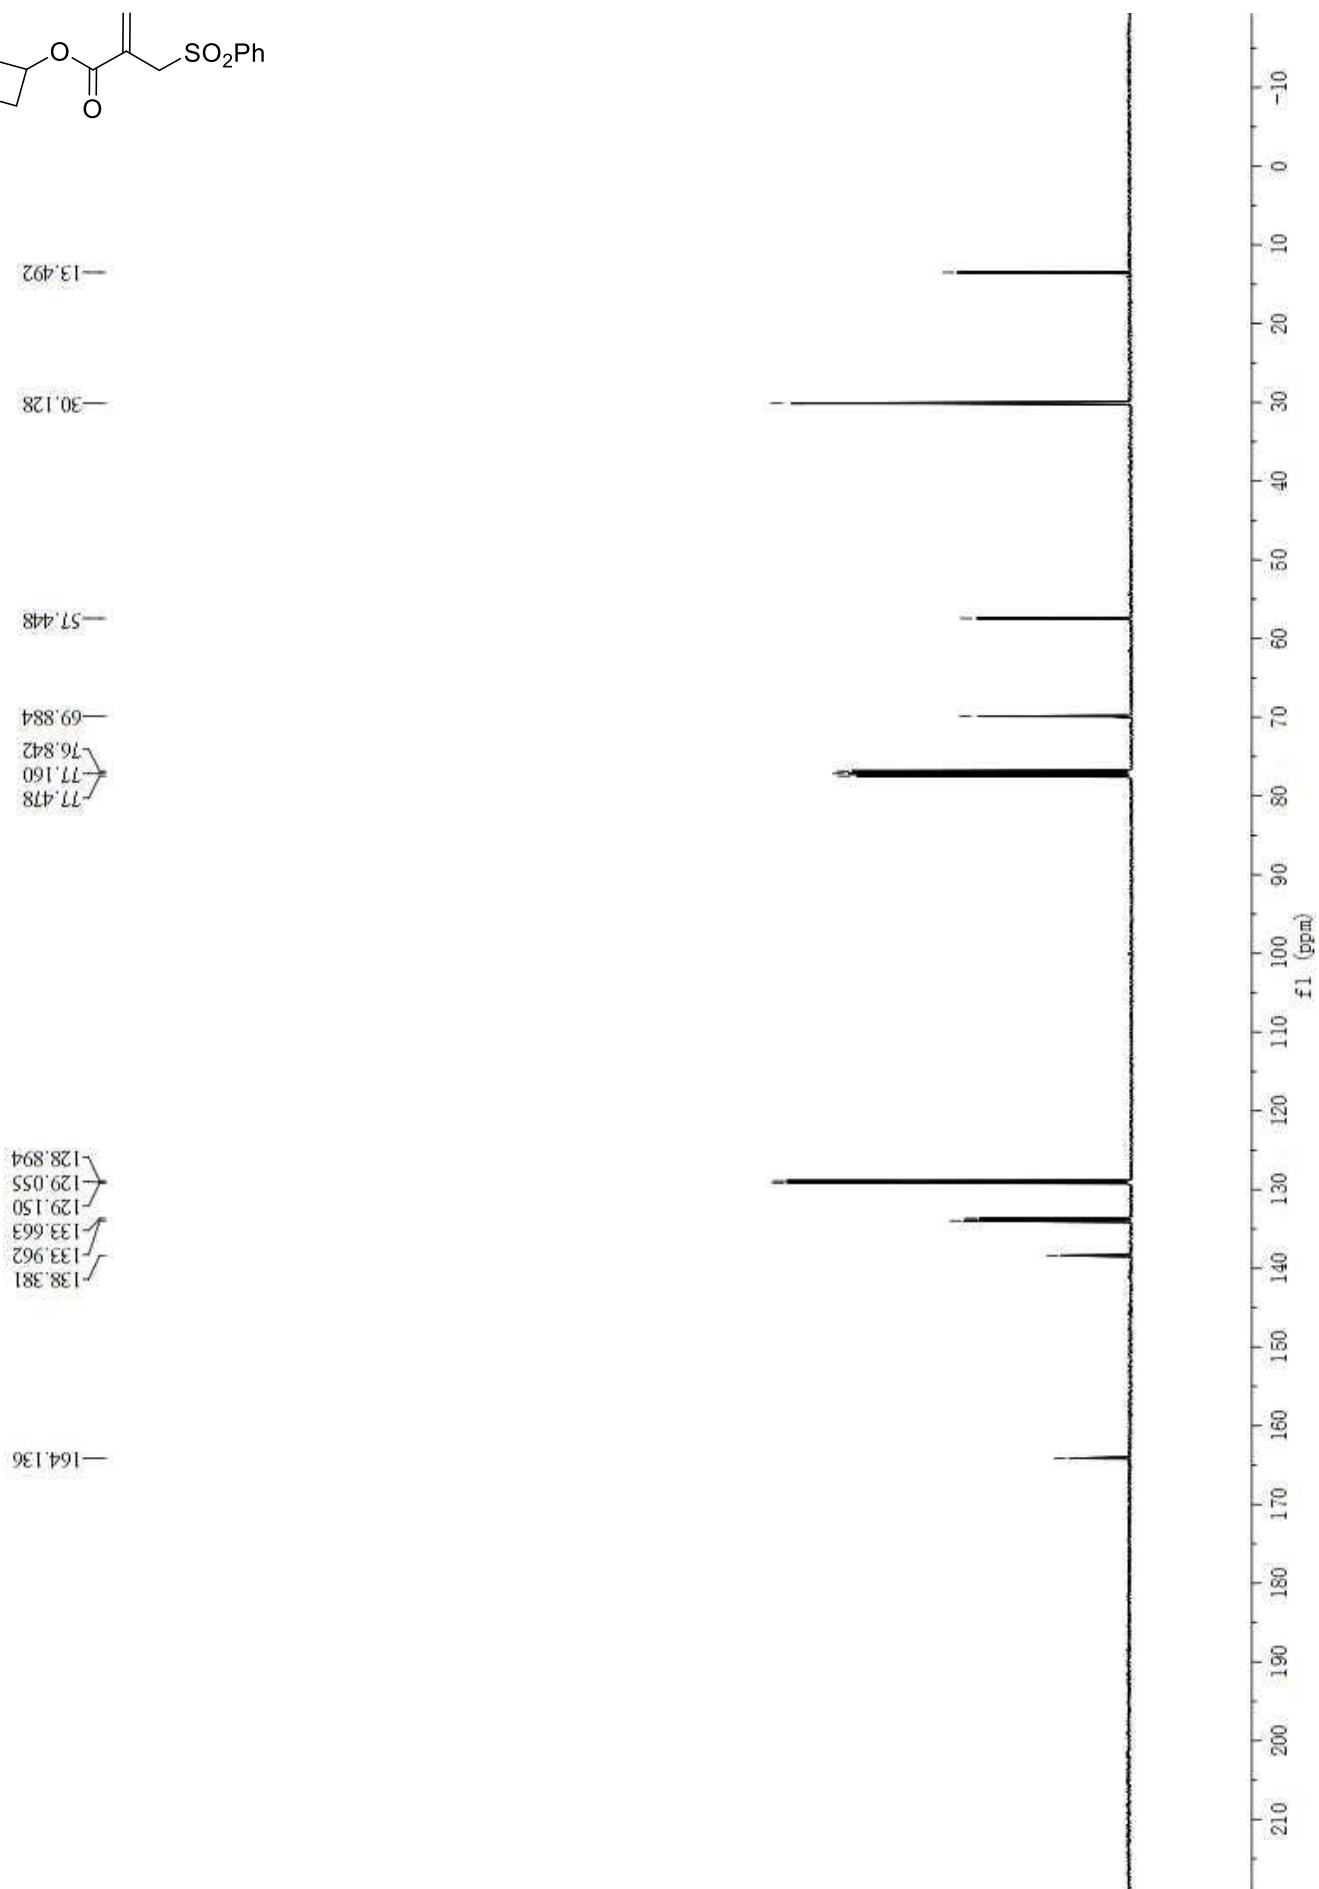

$^1\text{H}$  NMR of **7ai** ( $\text{CDCl}_3$ , 400 MHz, 25  $^\circ\text{C}$ )

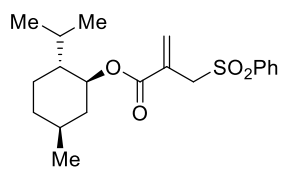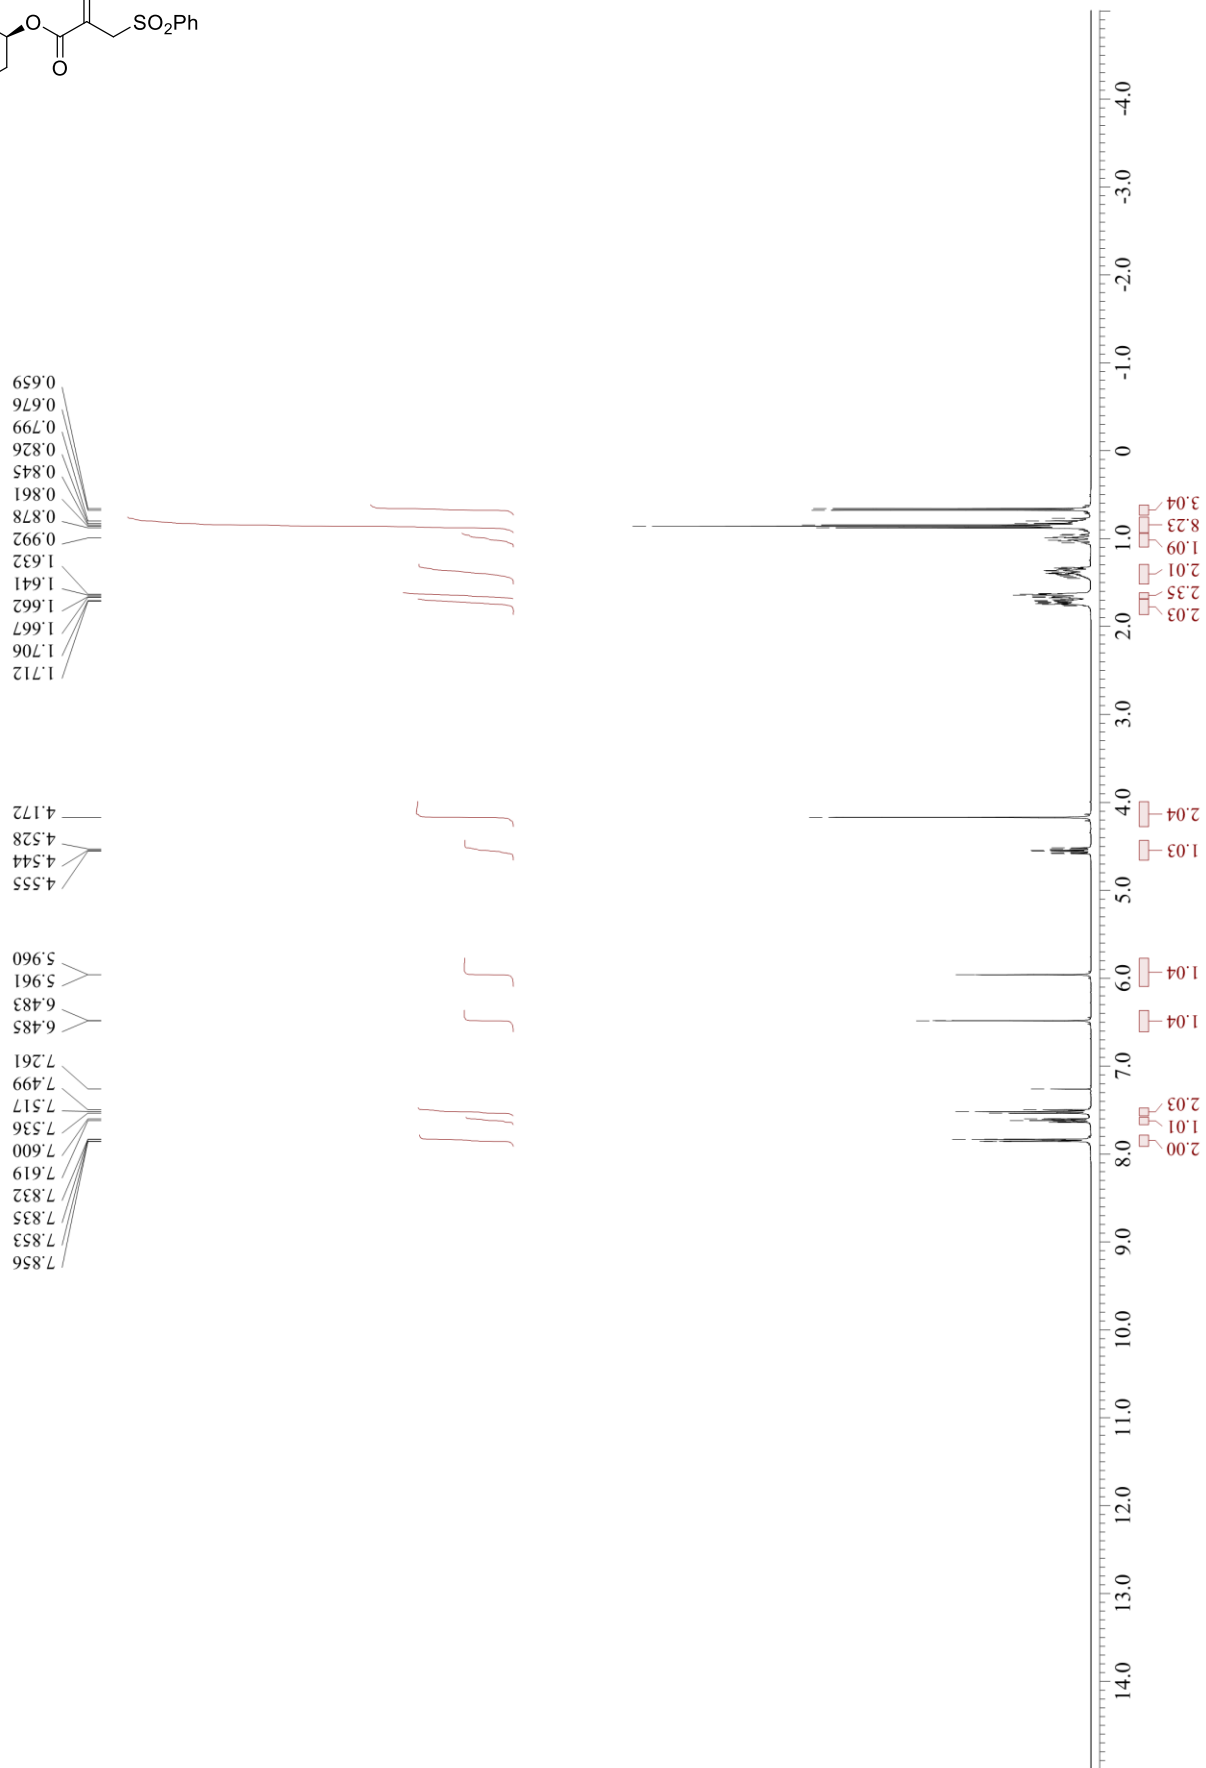

$^{13}\text{C}$  NMR of **7ai** ( $\text{CDCl}_3$ , 100 MHz, 25 °C)

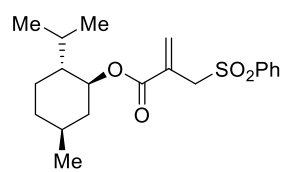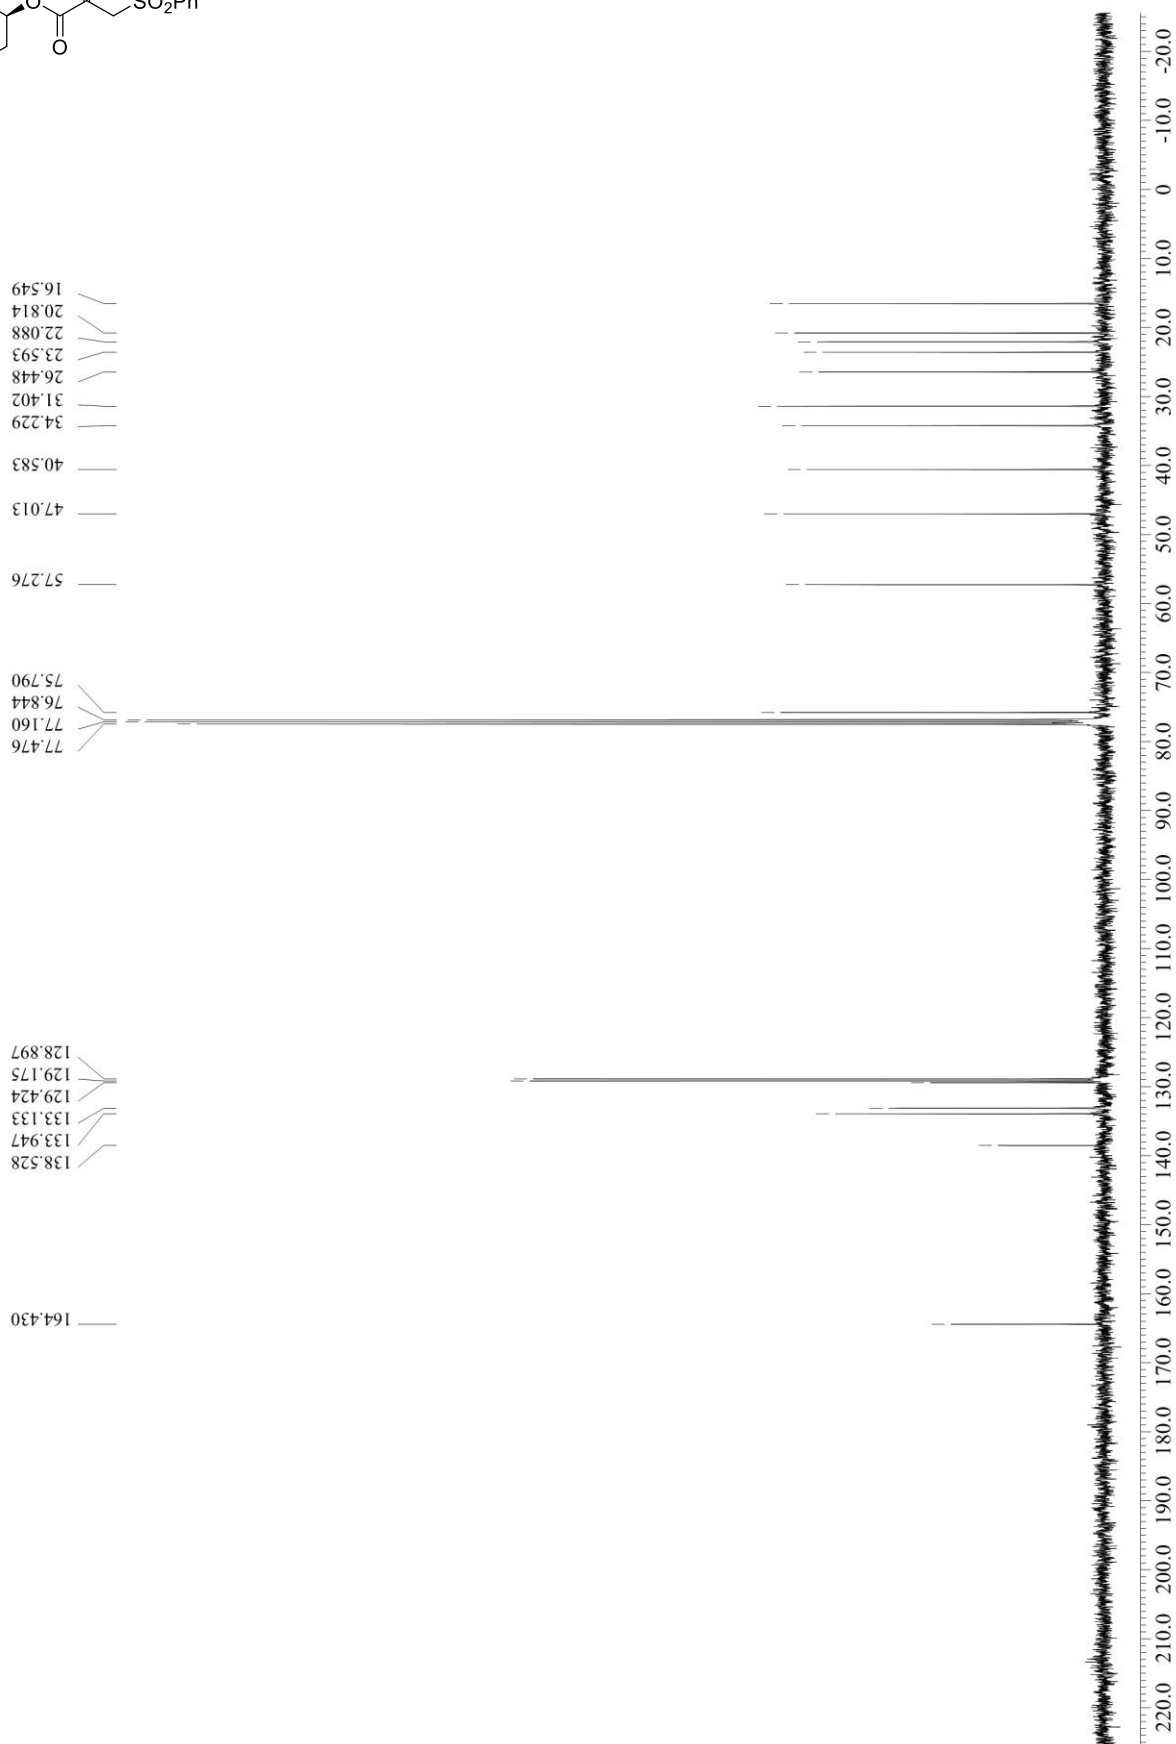

$^1\text{H}$  NMR of **7aj** ( $\text{CDCl}_3$ , 400 MHz, 25  $^\circ\text{C}$ )

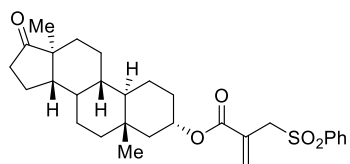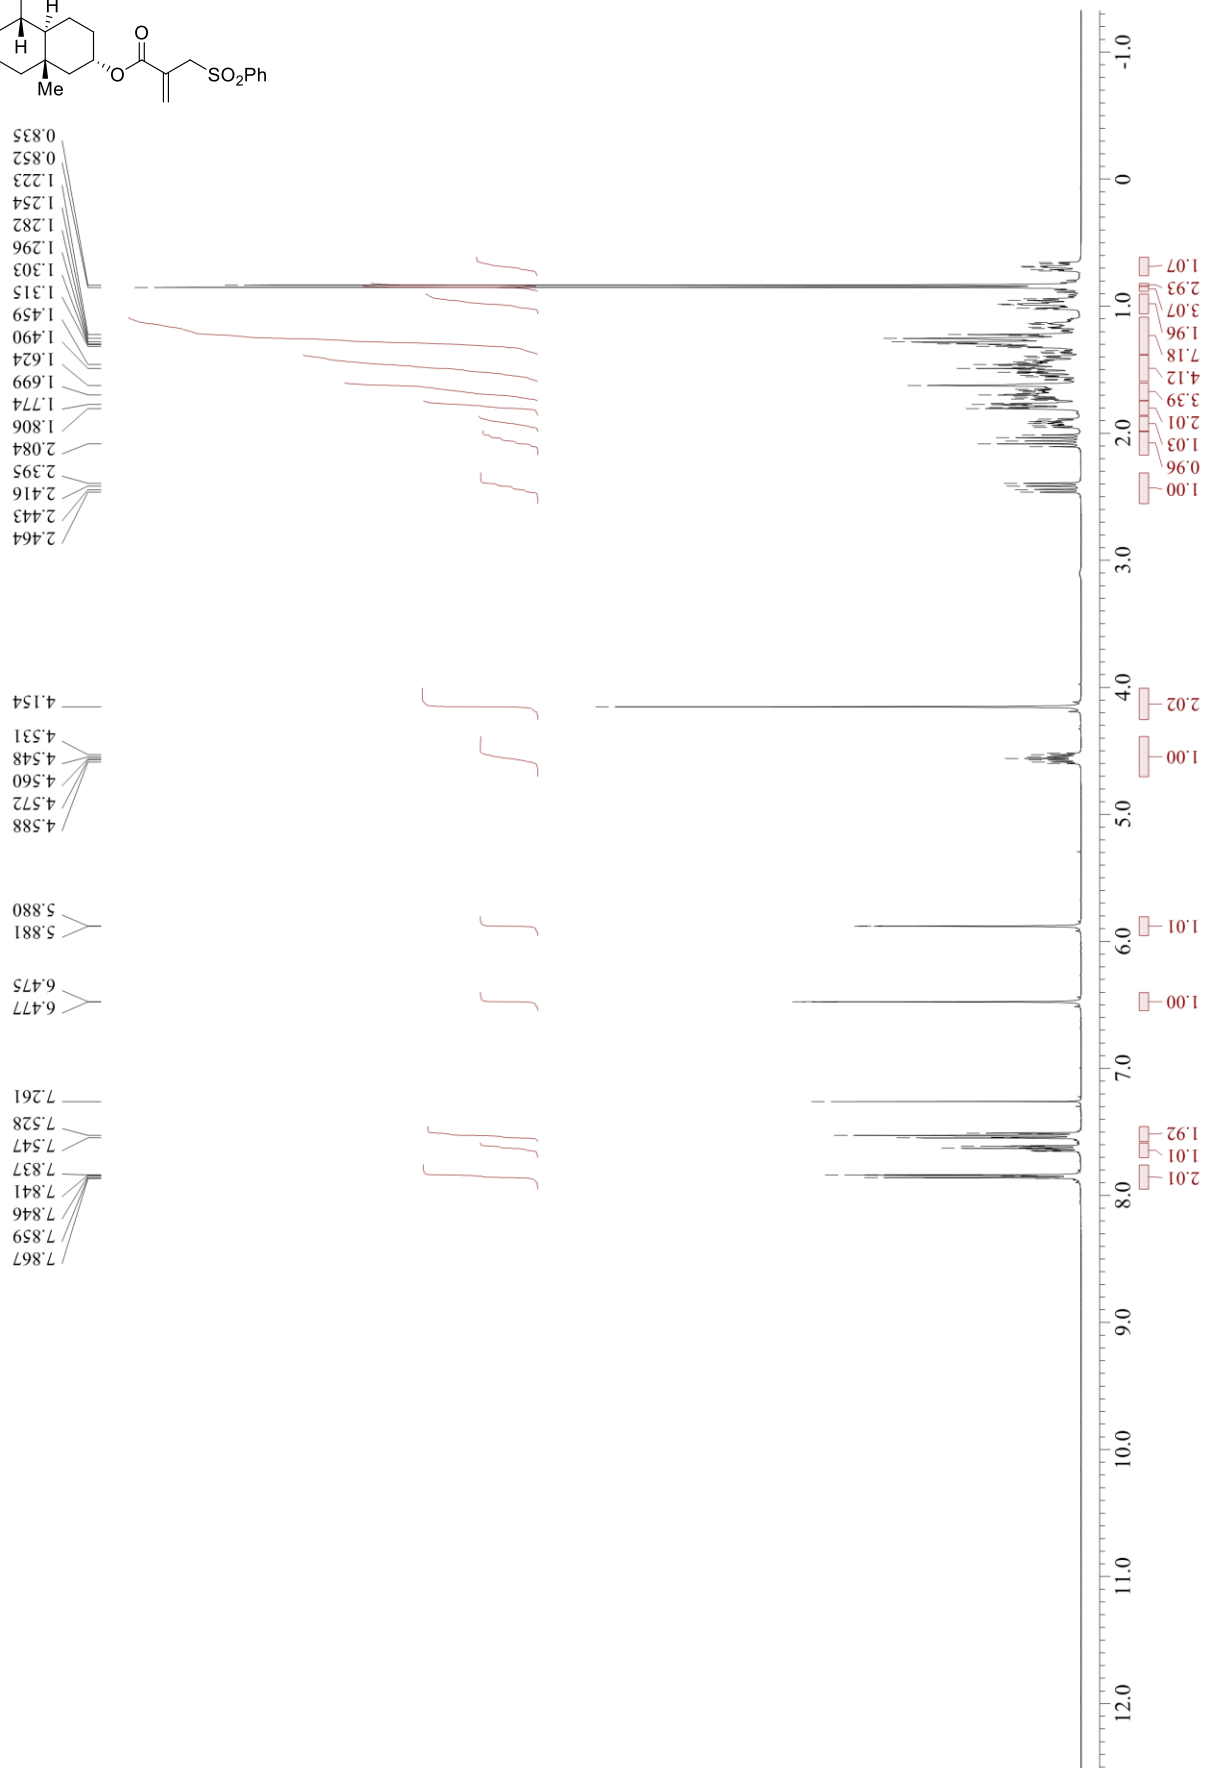

$^{13}\text{C}$  NMR of **7aj** ( $\text{CDCl}_3$ , 100 MHz, 25 °C)

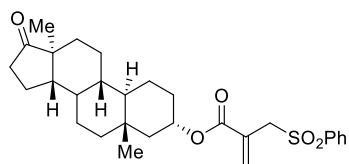

12.371  
13.943  
20.593  
21.896  
27.263  
28.365  
30.904  
31.632  
33.760  
35.140  
35.743  
35.973  
36.711  
44.684  
47.904  
51.469  
54.382  
57.573  
  
75.042  
76.844  
77.160  
77.476

128.926  
129.194  
129.539  
133.238  
133.957  
138.566

164.401

221.351

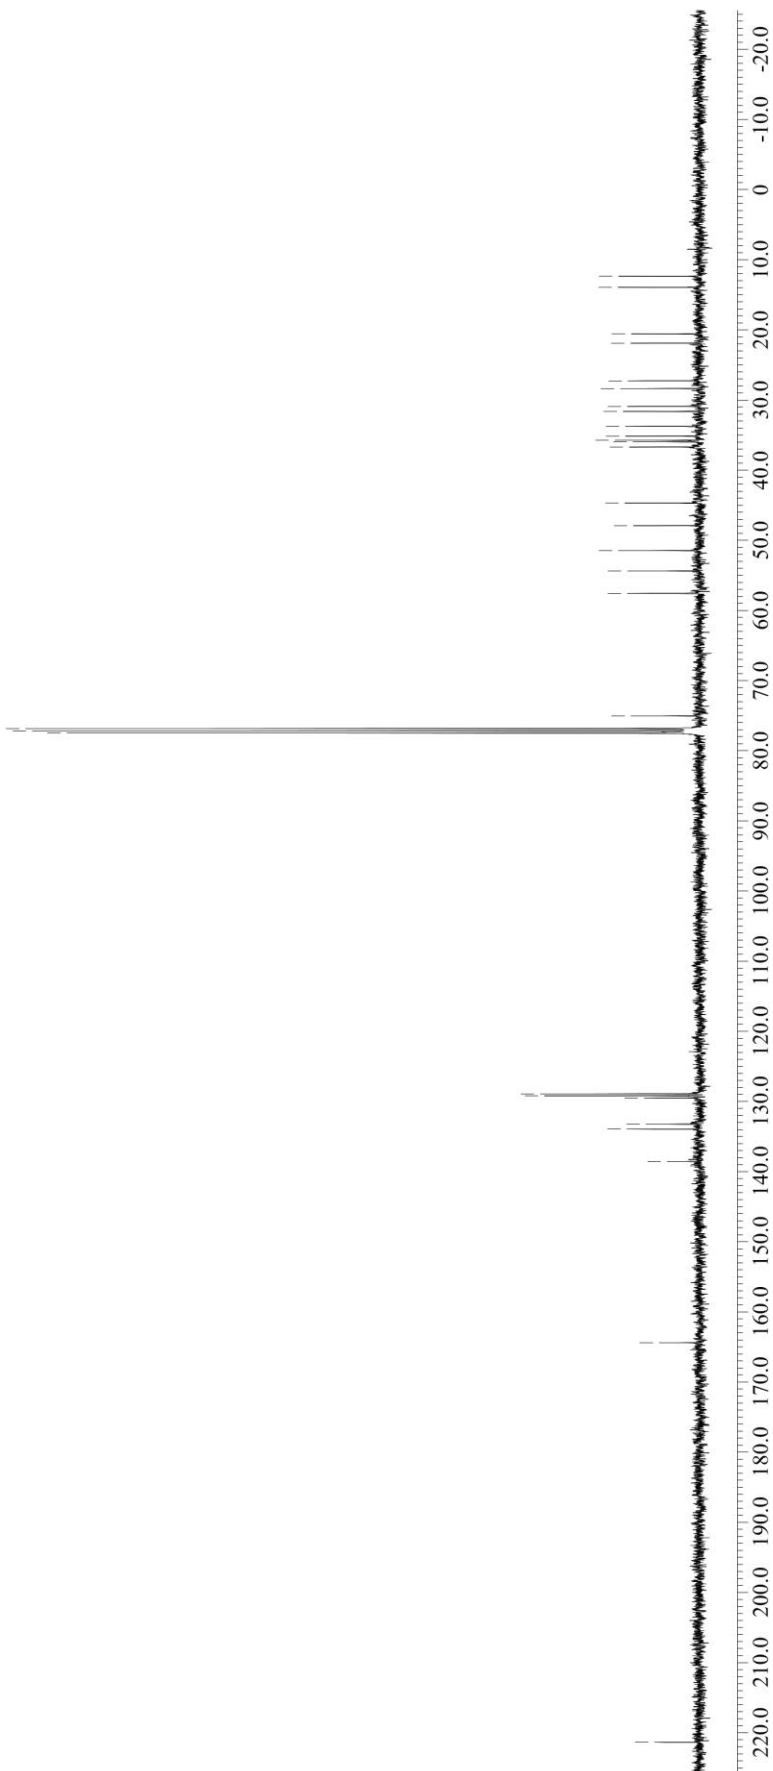

$^1\text{H}$  NMR of **7al** ( $\text{CDCl}_3$ , 400 MHz, 25  $^\circ\text{C}$ )

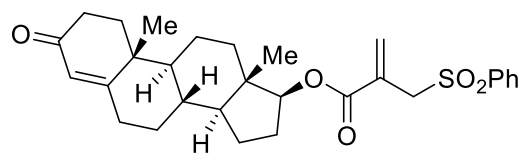

0.829  
0.918  
0.925  
1.001  
1.011  
1.030  
1.106  
1.116  
1.180  
1.371  
1.401  
1.568  
1.708  
1.713  
1.998  
2.030  
2.248  
2.284  
2.348  
2.366  
2.377  
2.401  
2.413

4.105  
4.139  
4.152  
4.187  
4.473  
4.493  
4.514

5.715  
5.863

6.475

7.261  
7.524  
7.543  
7.836  
7.855

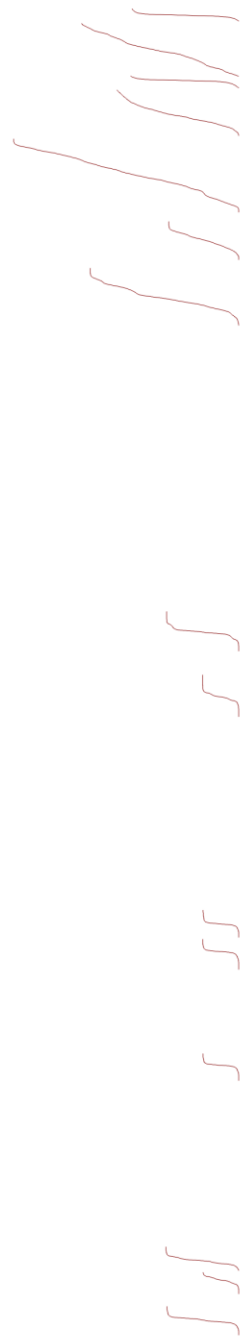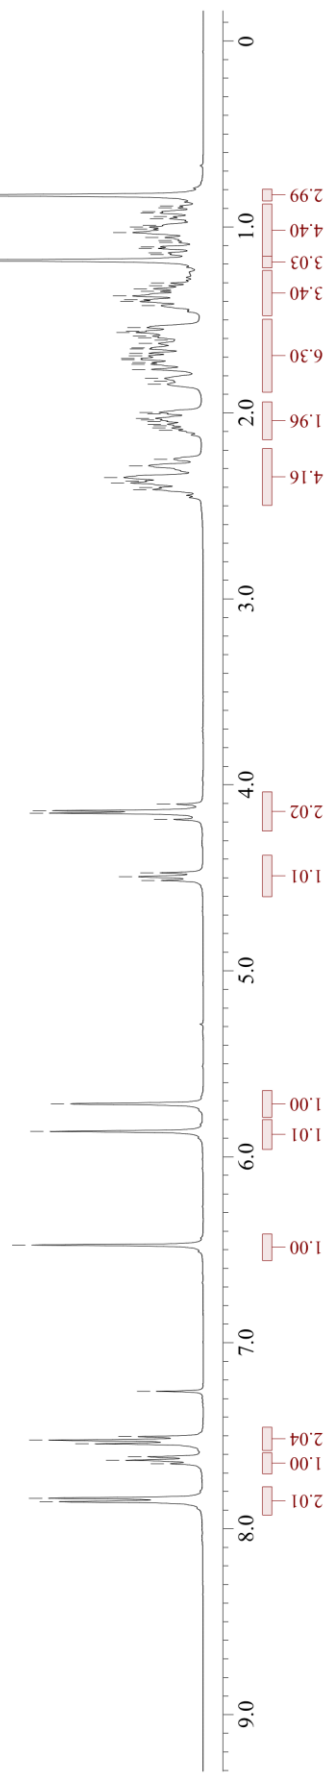

$^{13}\text{C}$  NMR of **7al** ( $\text{CDCl}_3$ , 100 MHz, 25  $^\circ\text{C}$ )

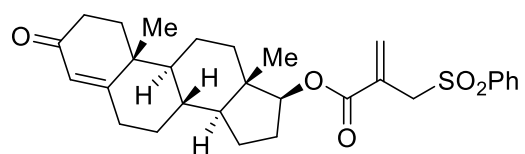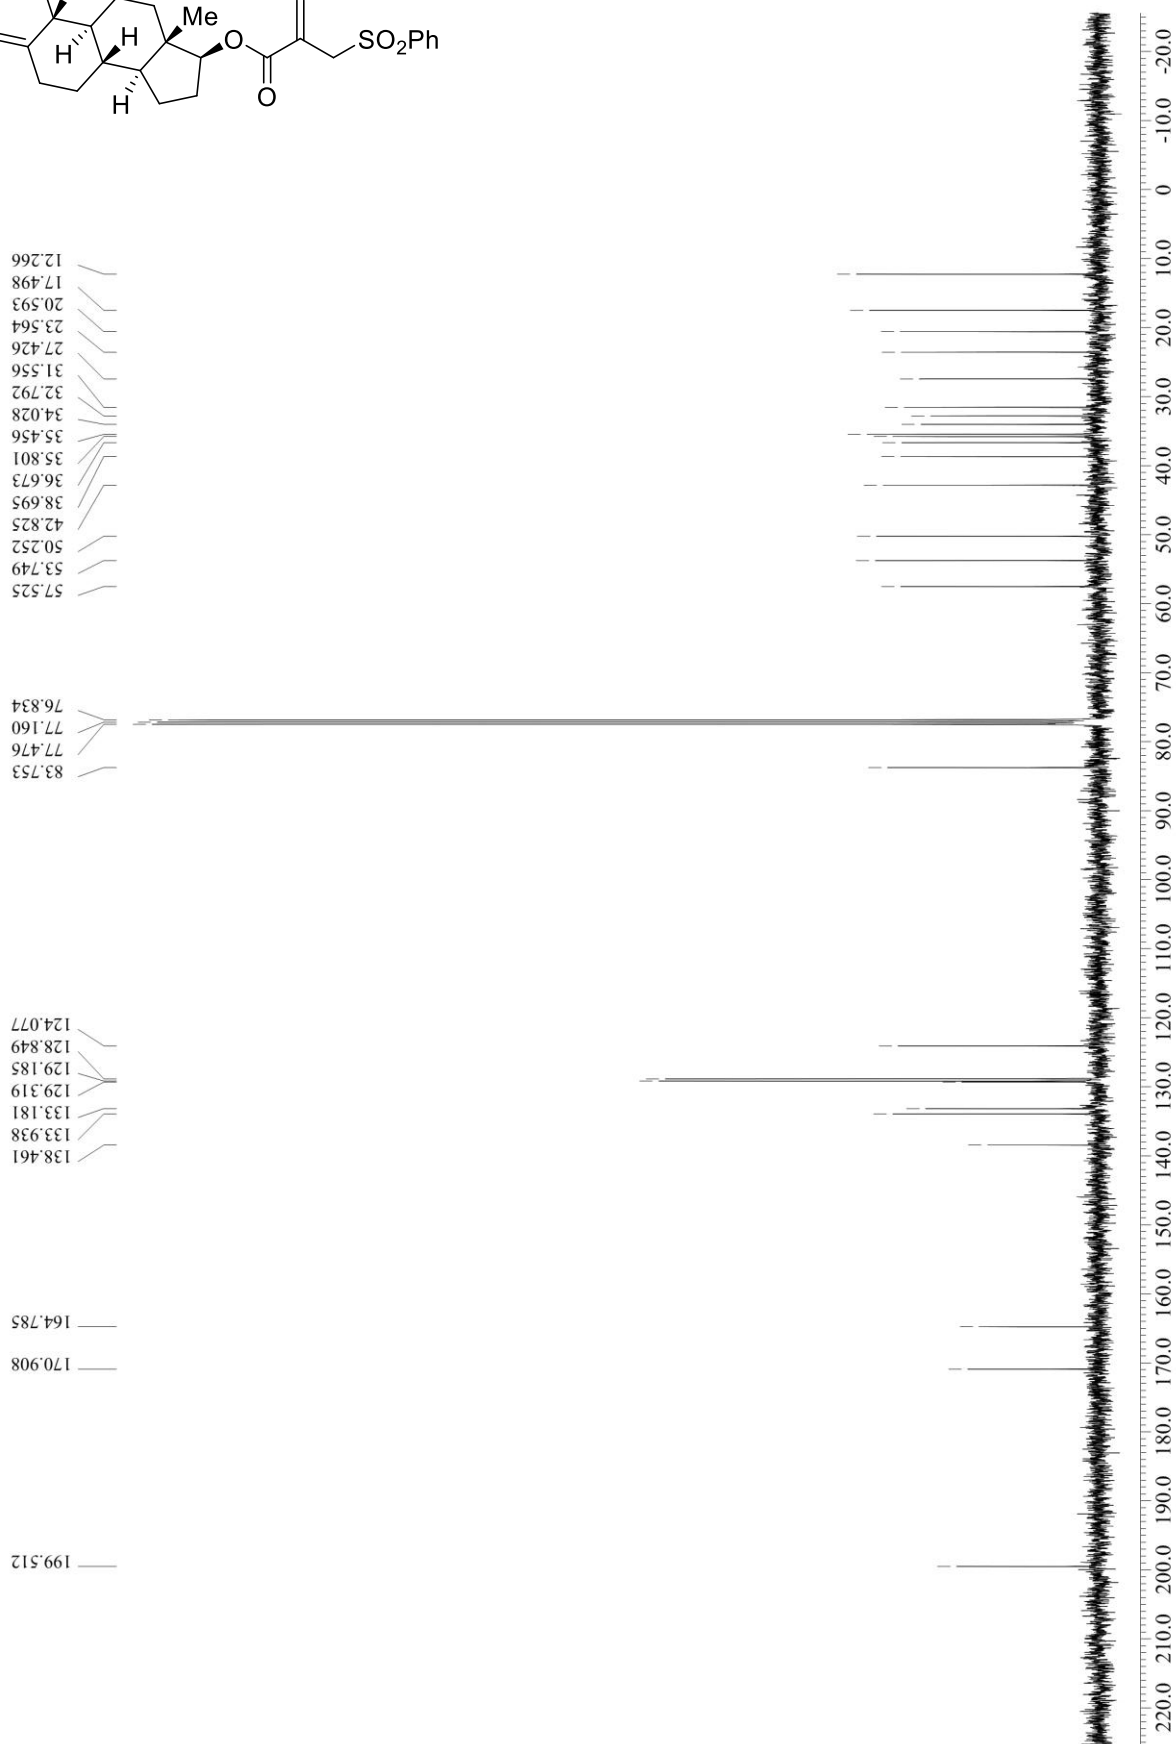

$^1\text{H}$  NMR of **7an** ( $\text{CDCl}_3$ , 400 MHz, 25 °C)

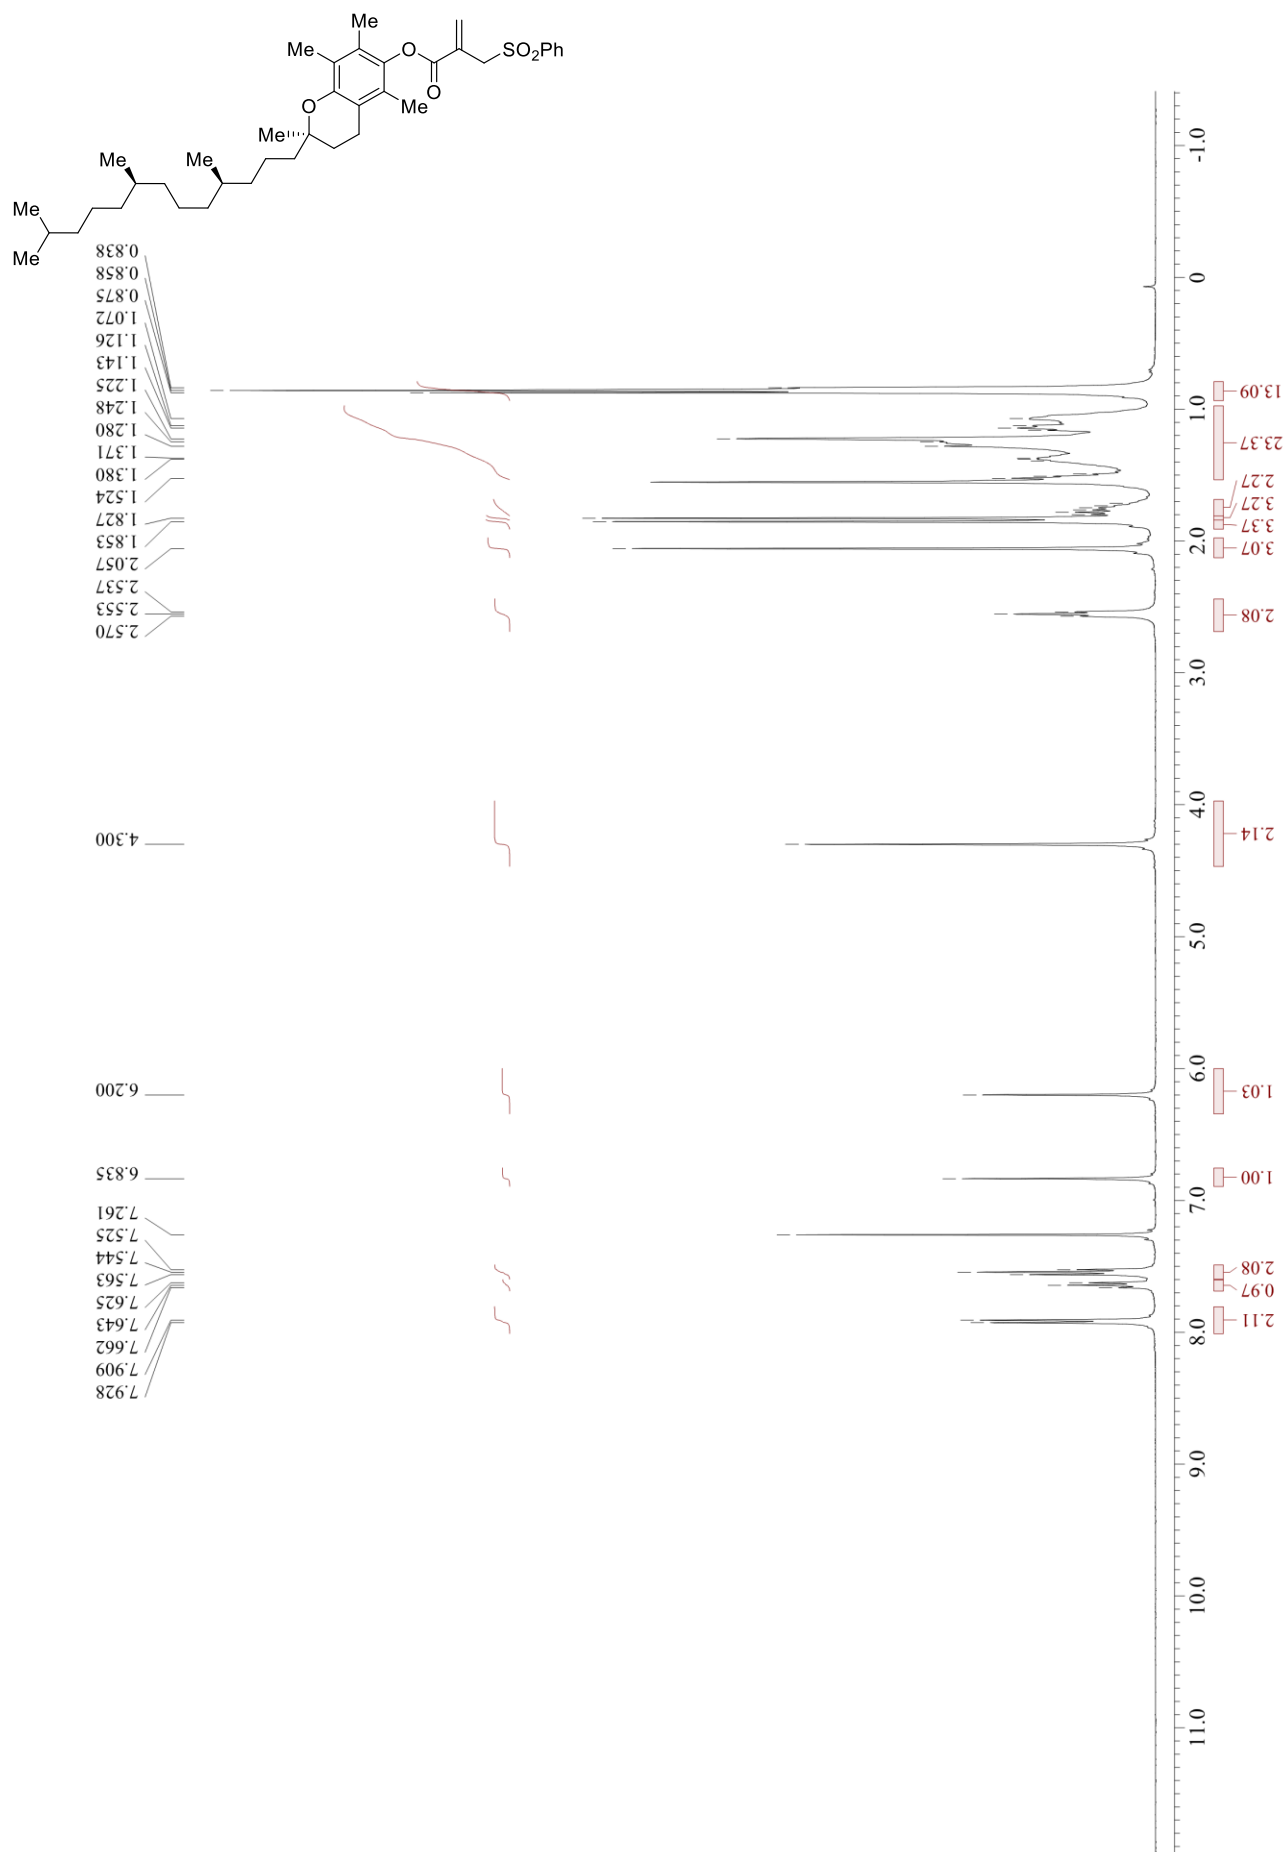



$^{13}\text{C}$  NMR of **7an** ( $\text{CDCl}_3$ , 100 MHz, 25 °C)

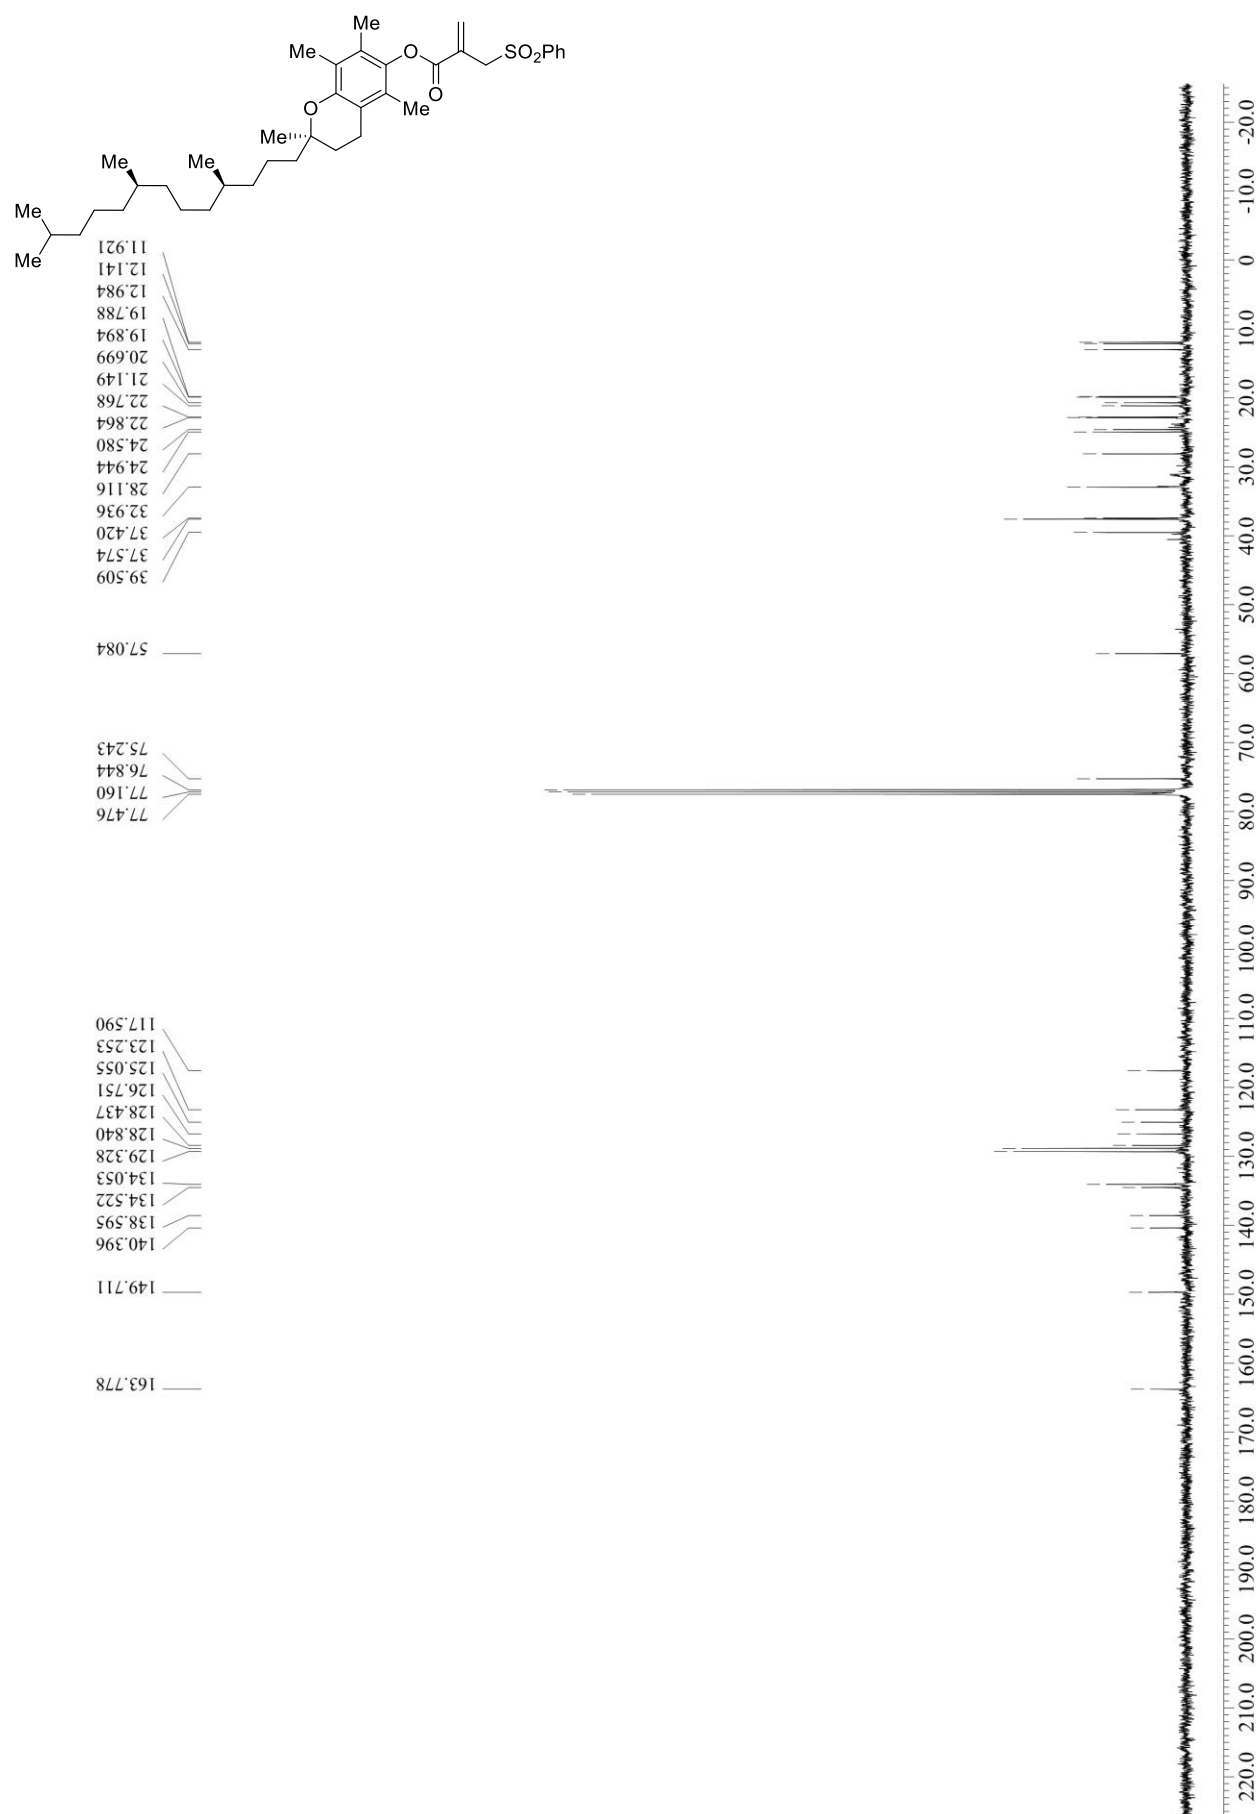

$^1\text{H}$  NMR of **7ao** ( $\text{CDCl}_3$ , 400 MHz, 25  $^\circ\text{C}$ )

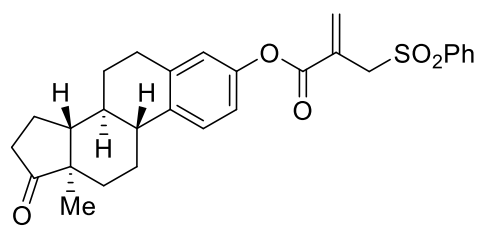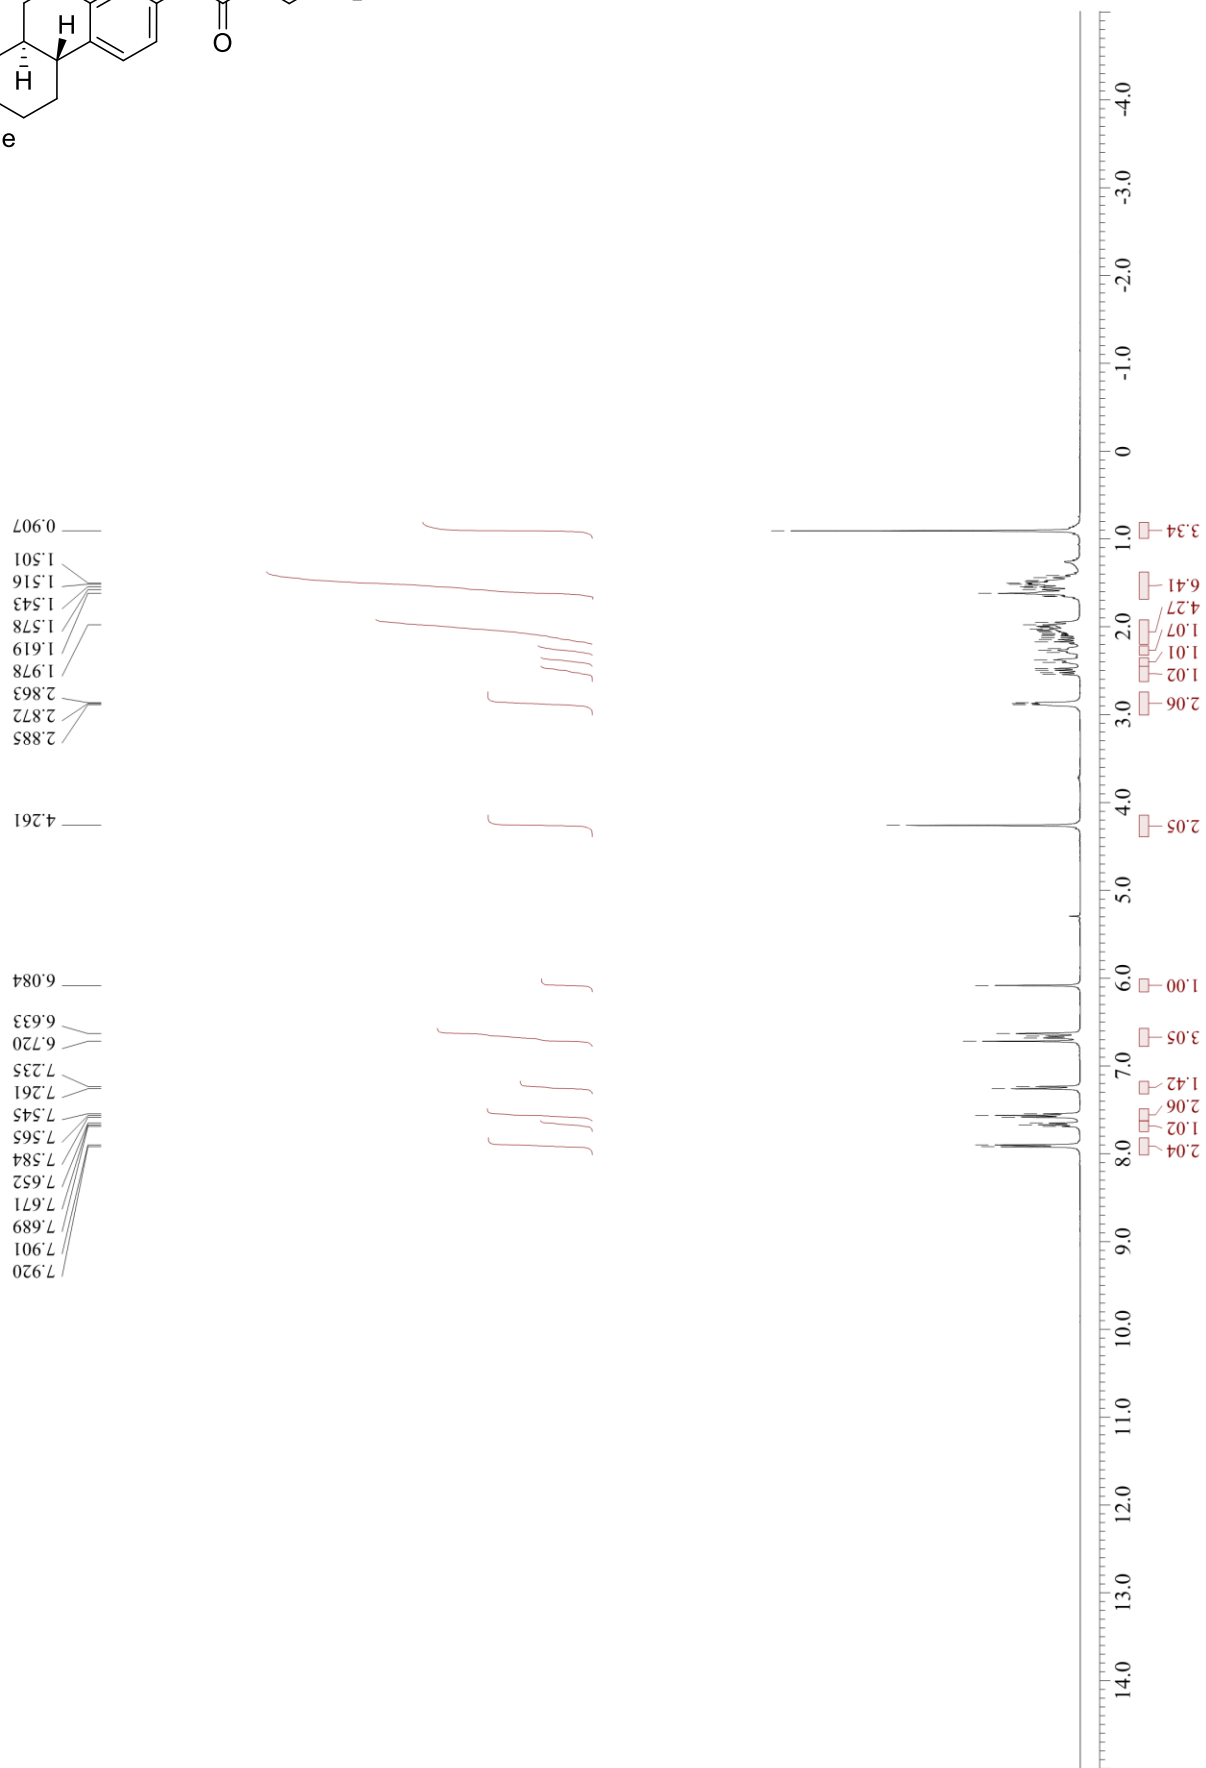

$^{13}\text{C}$  NMR of **7ao** ( $\text{CDCl}_3$ , 100 MHz, 25 °C)

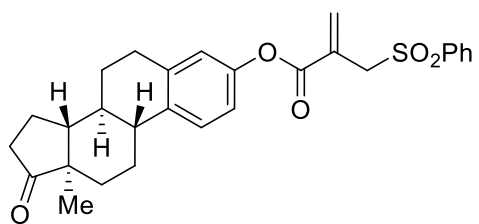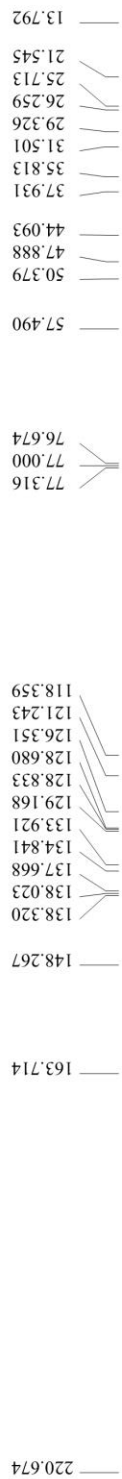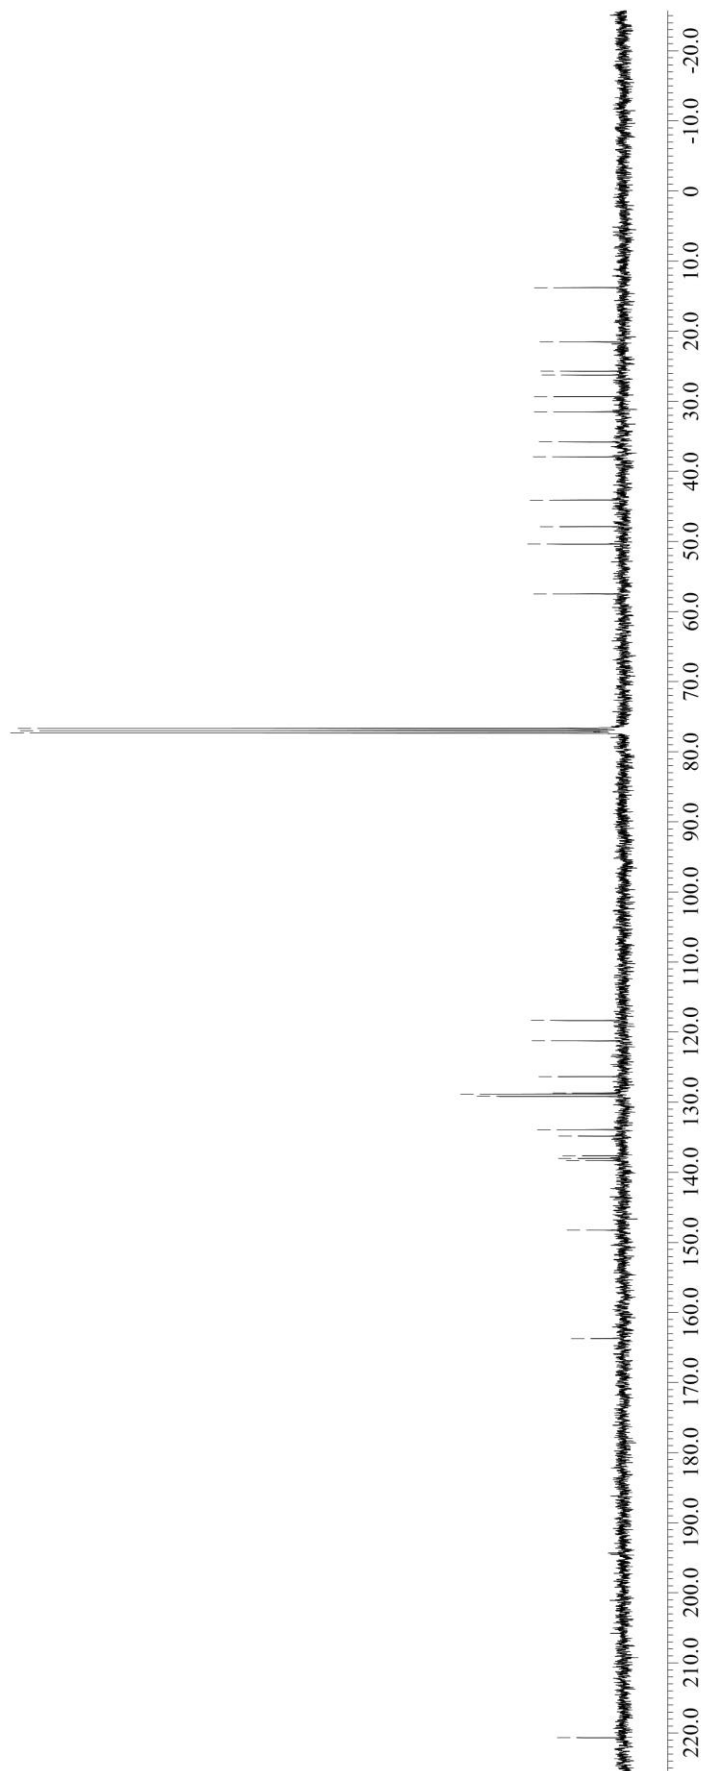

$^1\text{H}$  NMR of **7ab** ( $\text{CDCl}_3$ , 400 MHz, 25  $^\circ\text{C}$ )

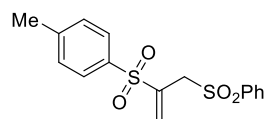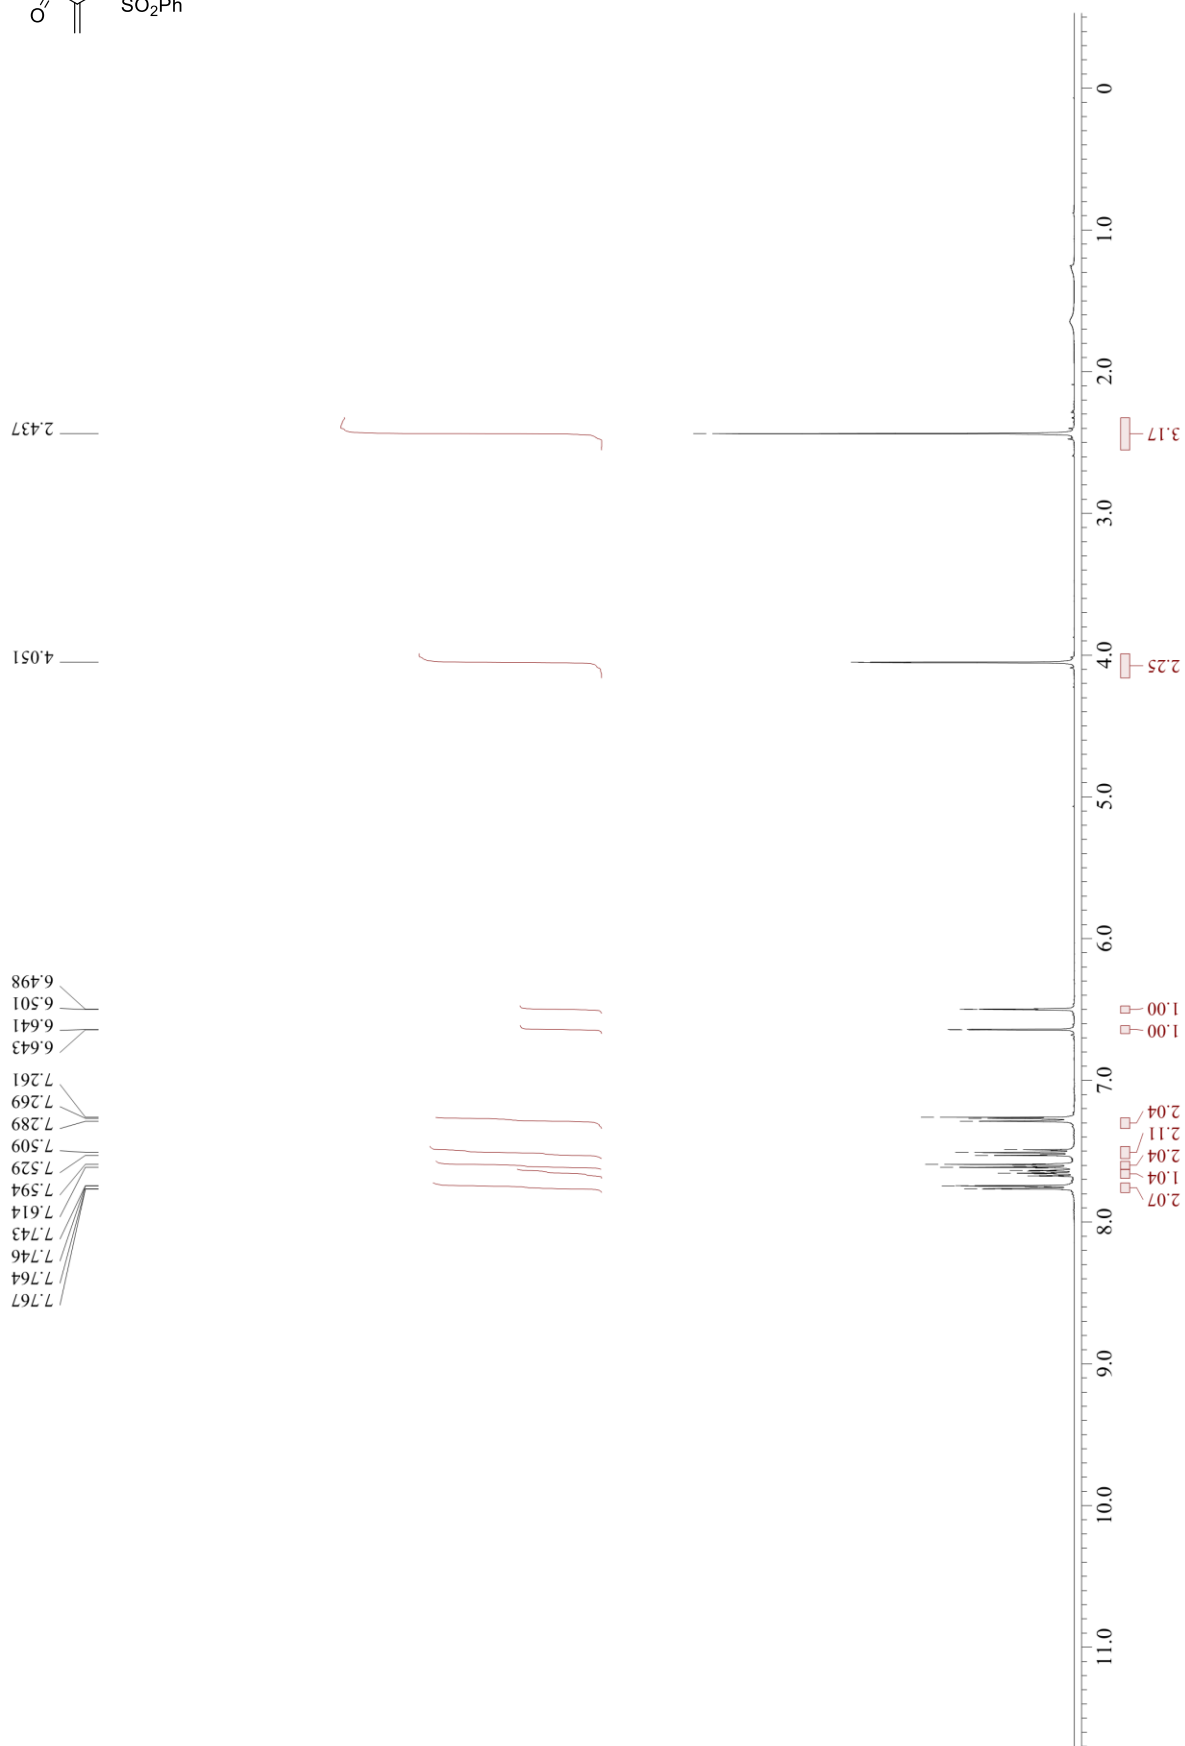

$^{13}\text{C}$  NMR of **7ab** ( $\text{CDCl}_3$ , 100 MHz, 25 °C)

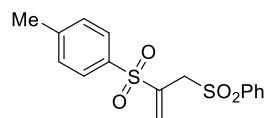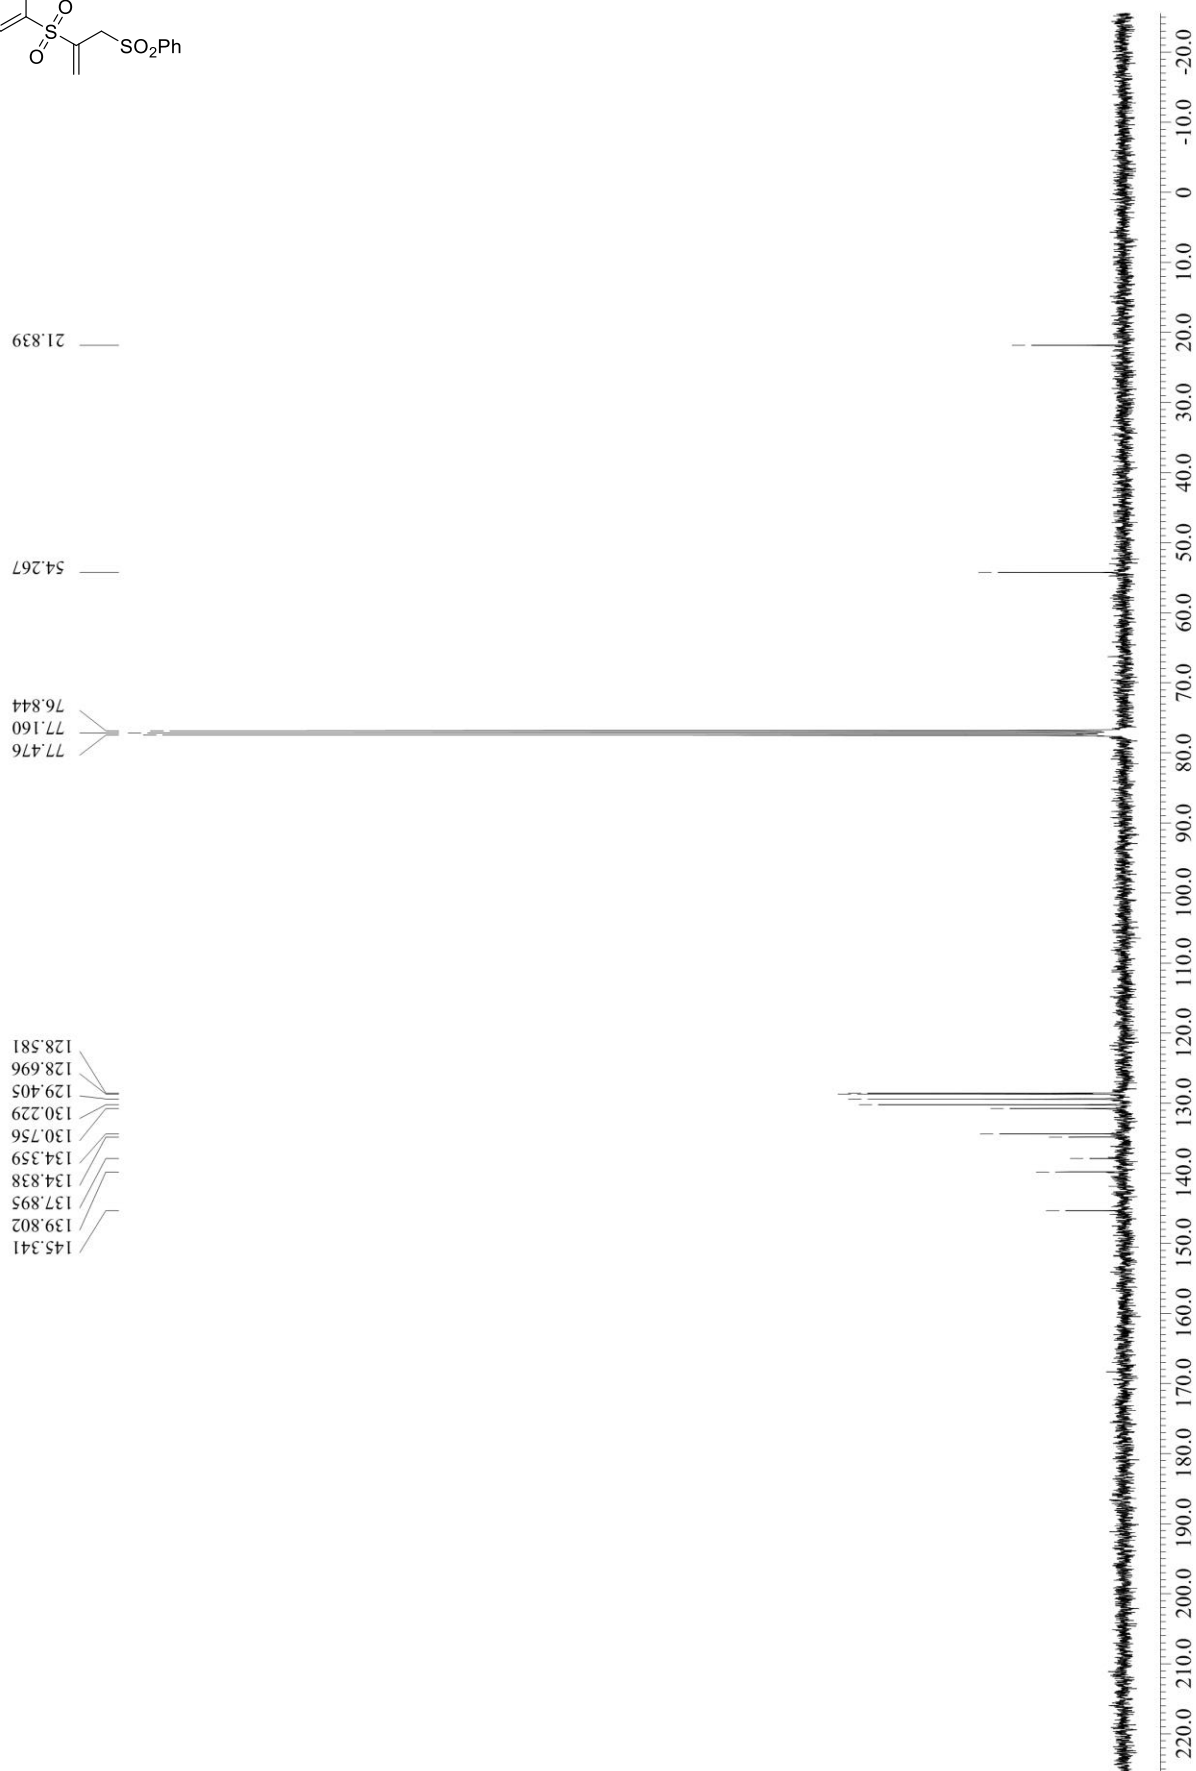

$^1\text{H}$  NMR of **7ad** ( $\text{CDCl}_3$ , 400 MHz, 25  $^\circ\text{C}$ )

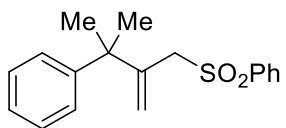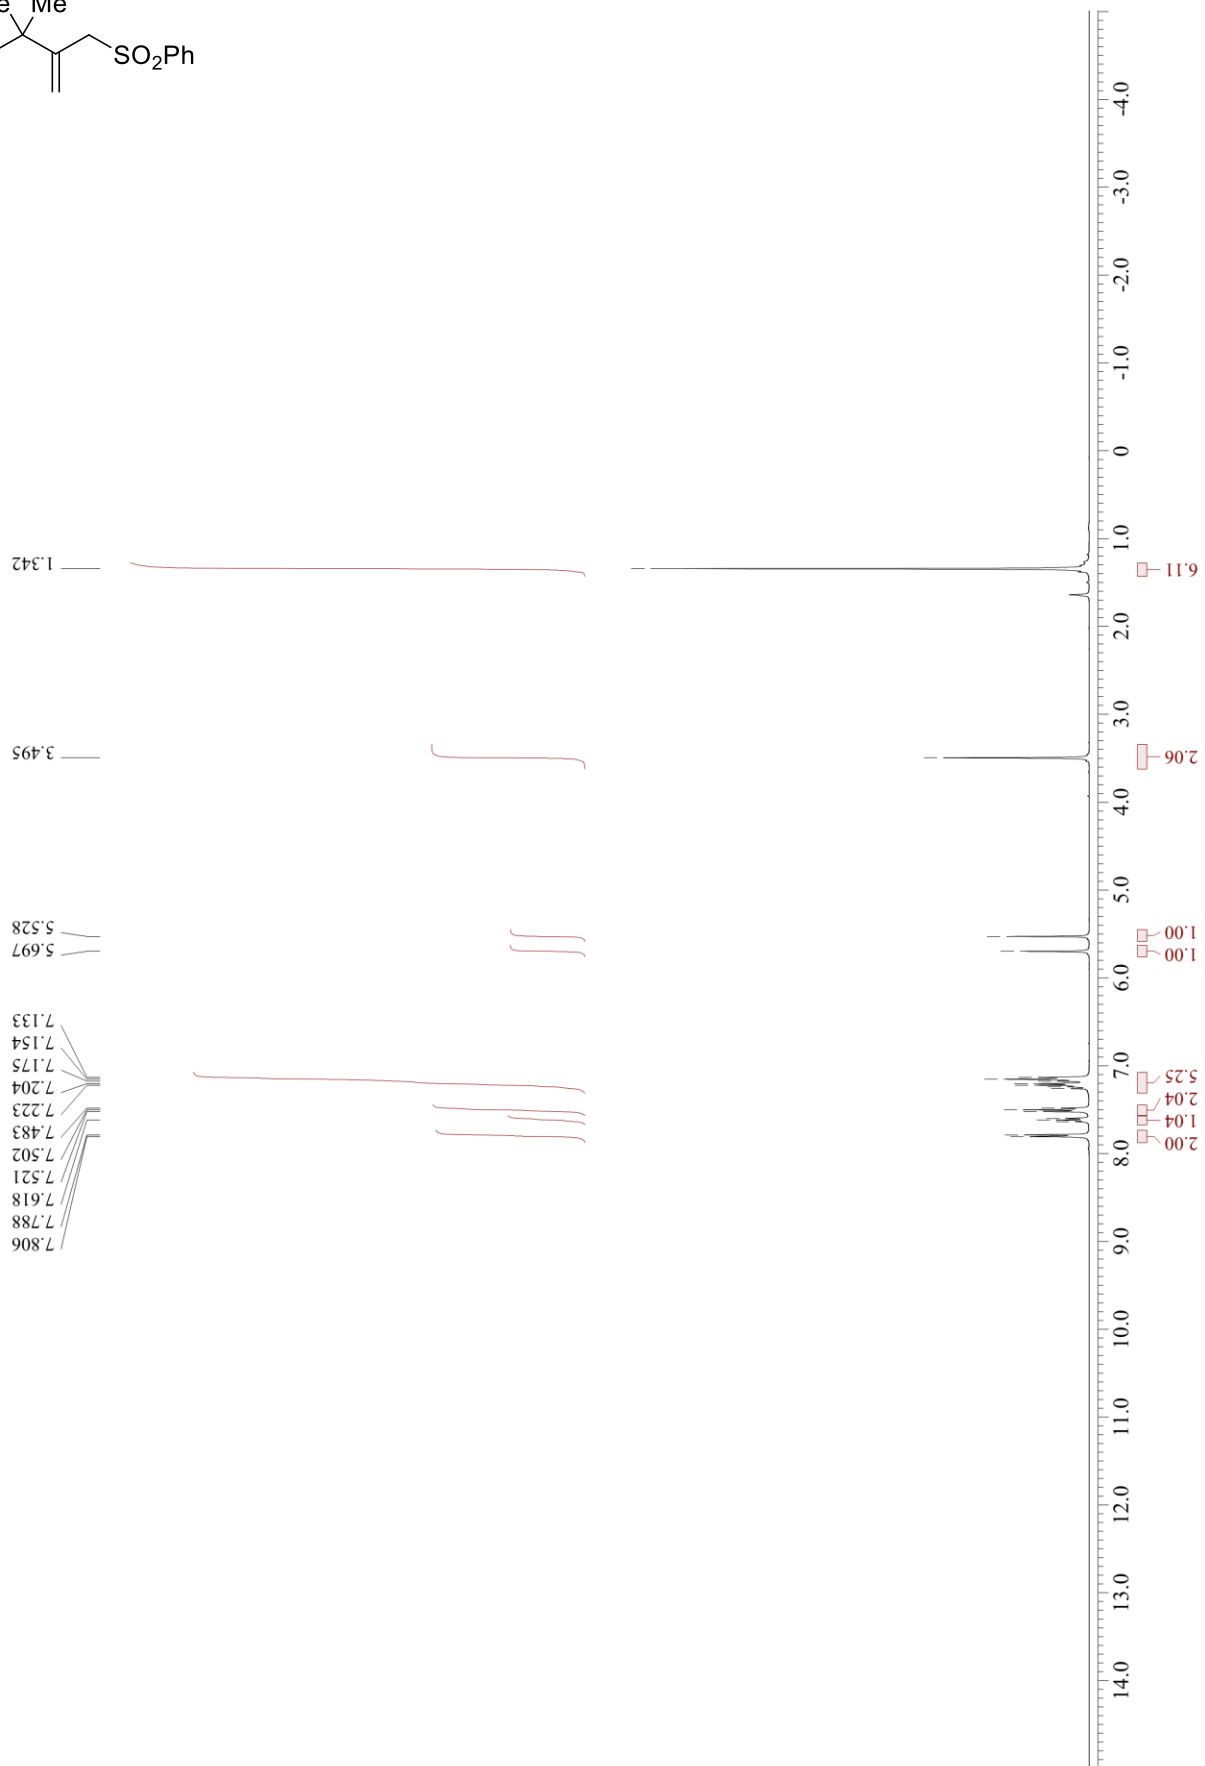

$^{13}\text{C}$  NMR of **7ad** ( $\text{CDCl}_3$ , 100 MHz, 25 °C)

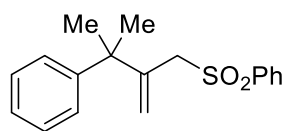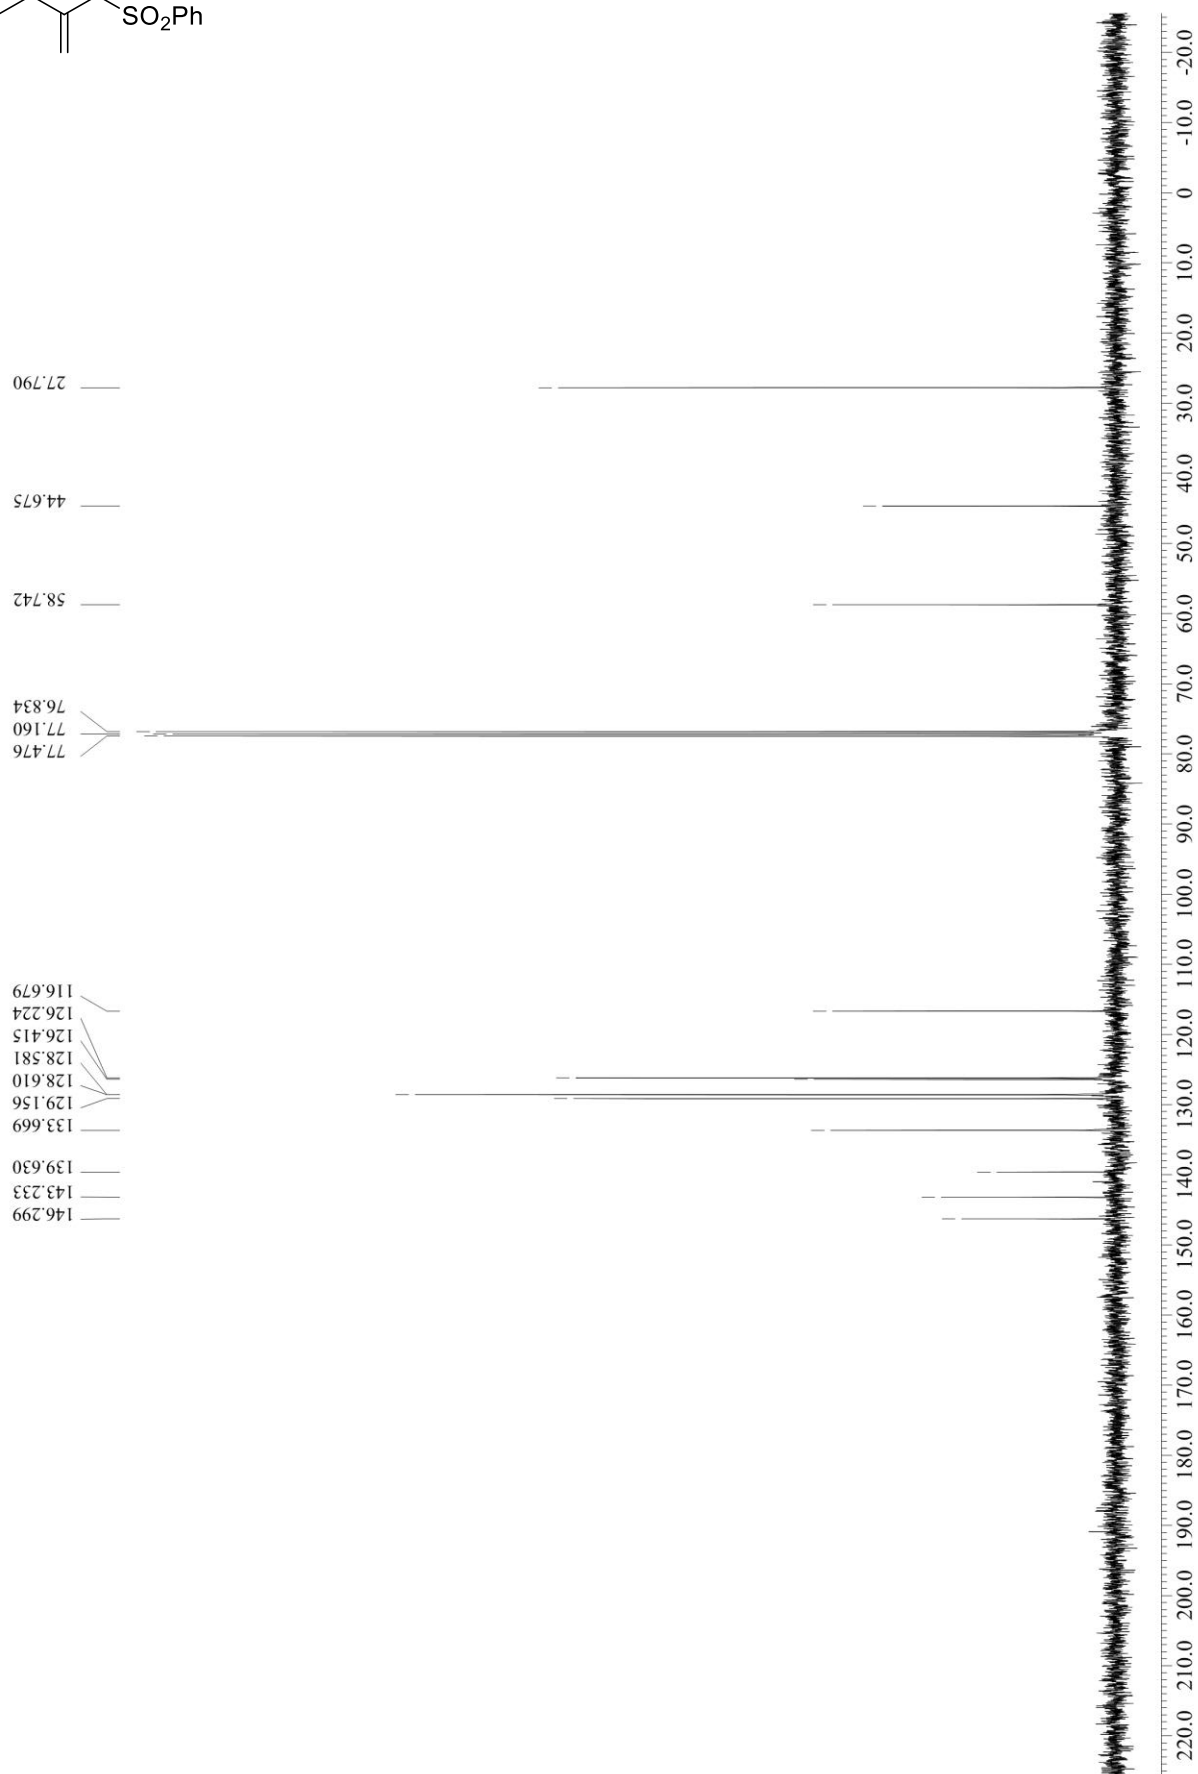

$^1\text{H}$  NMR of **7af** ( $\text{CDCl}_3$ , 400 MHz, 25  $^\circ\text{C}$ )

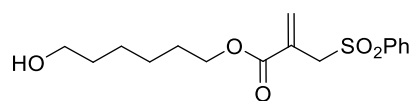

1.754  
1.564  
1.547  
1.530  
1.337  
1.329  
1.315

4.141  
3.973  
3.956  
3.940  
3.631  
3.614  
3.598

5.859

6.470

7.843  
7.824  
7.646  
7.627  
7.609  
7.539  
7.519  
7.500  
7.261

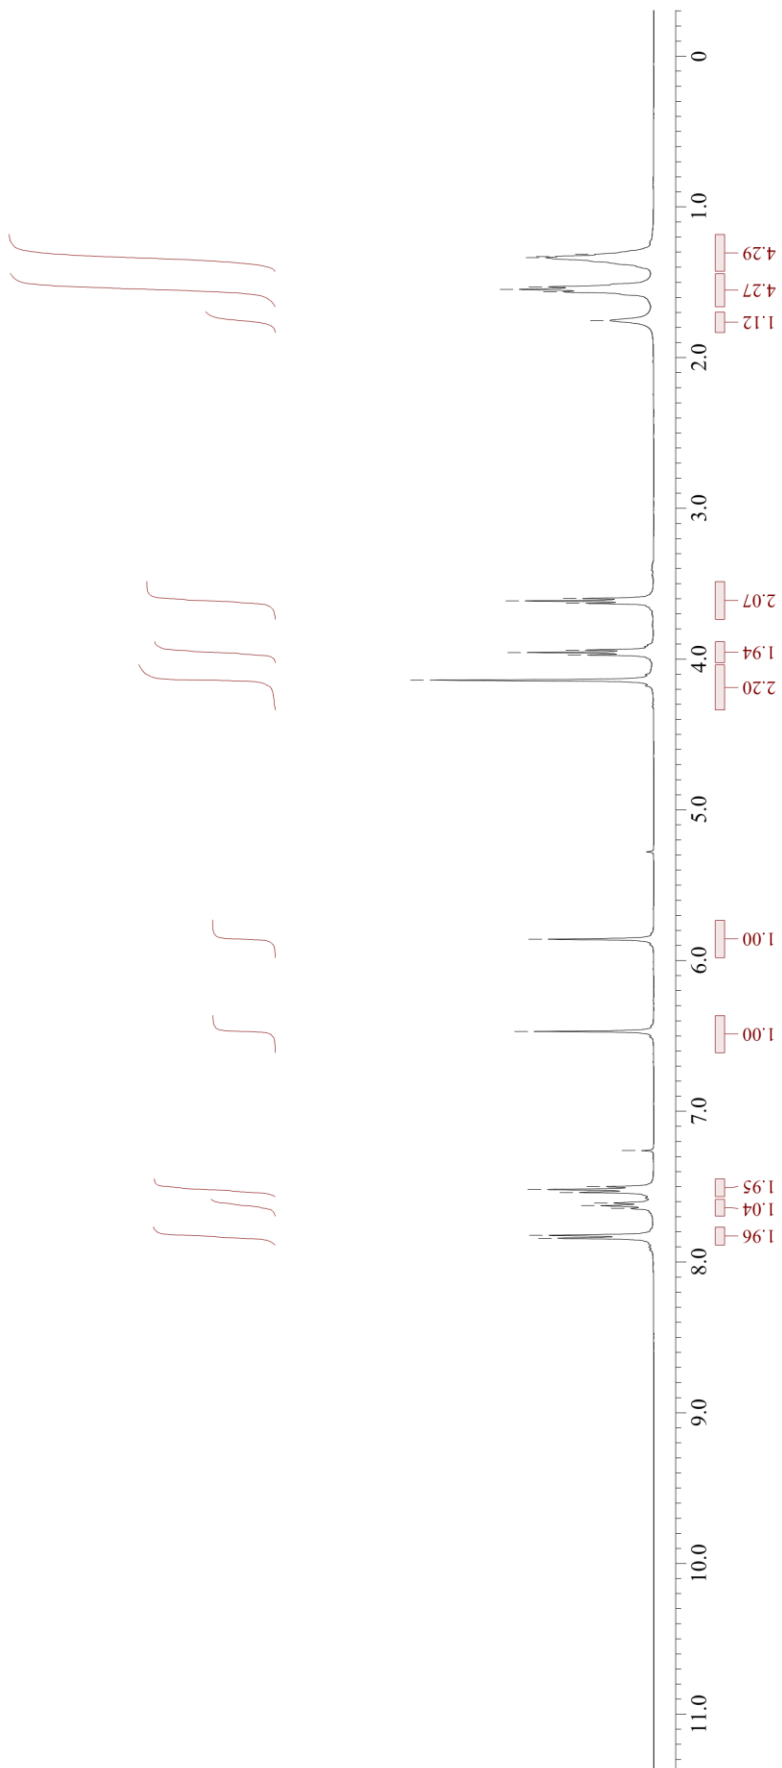



$^{13}\text{C}$  NMR of **7af** ( $\text{CDCl}_3$ , 100 MHz, 25 °C)

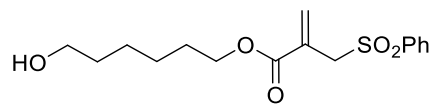

32.581  
28.432  
25.701  
25.404

65.584  
62.709  
57.611

77.486  
77.160  
76.844

138.384  
133.986  
133.411  
129.156  
128.801

164.928

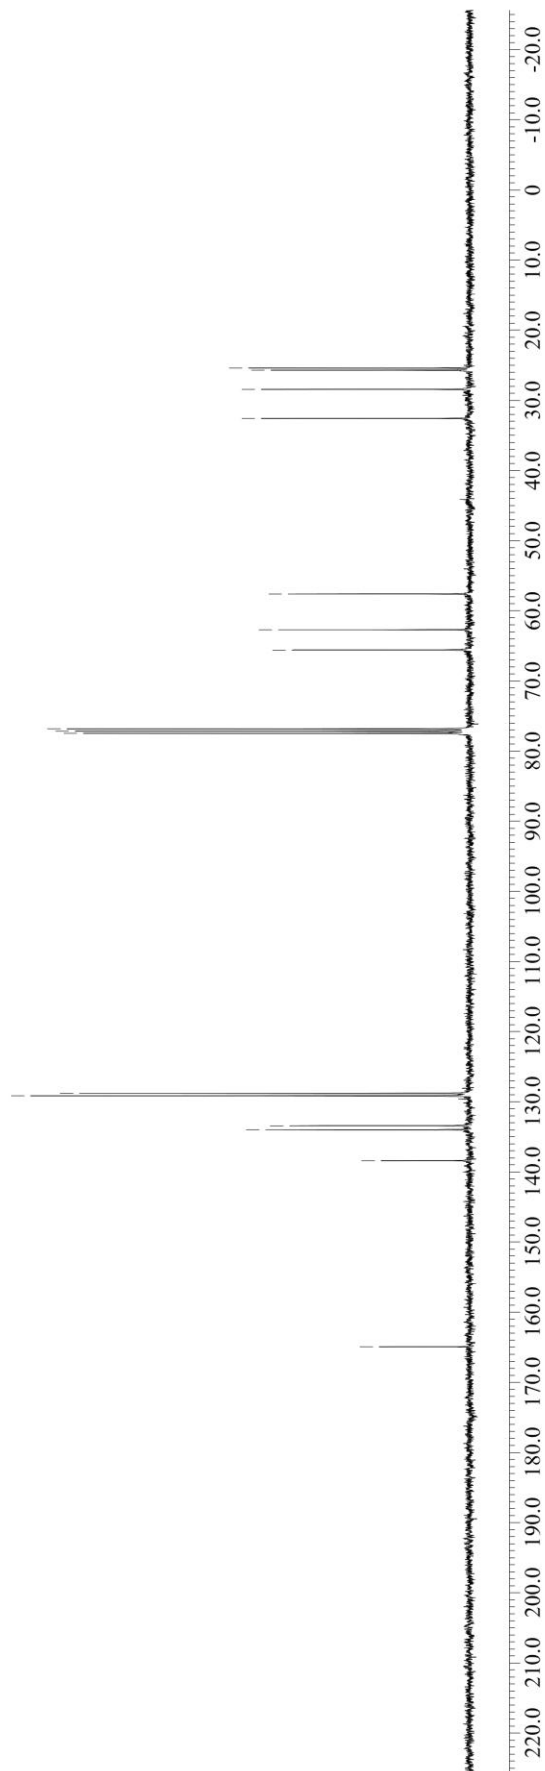

$^1\text{H}$  NMR of **7ag** ( $\text{CDCl}_3$ , 400 MHz, 25  $^\circ\text{C}$ )

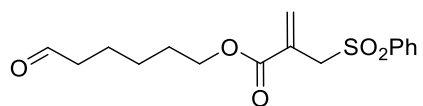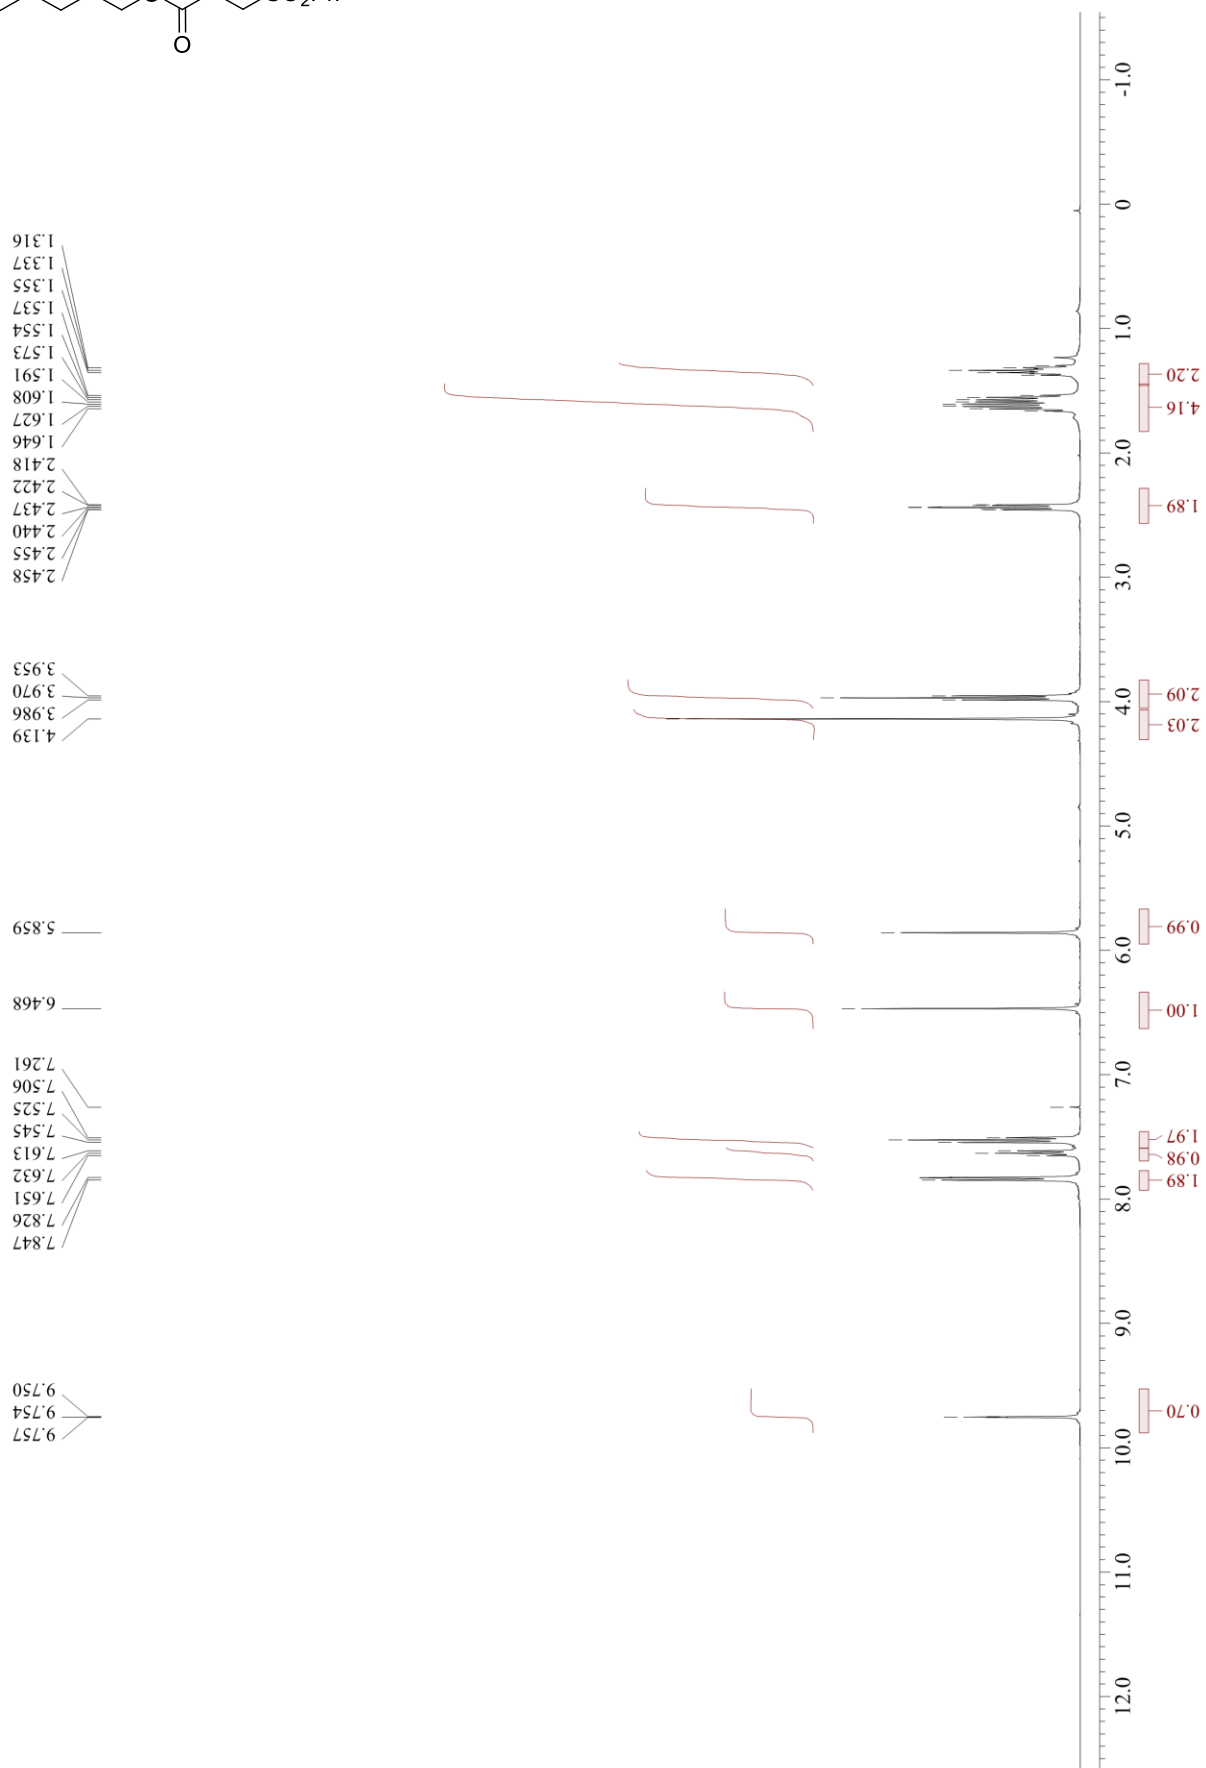

$^{13}\text{C}$  NMR of **7ag** ( $\text{CDCl}_3$ , 100 MHz, 25 °C)

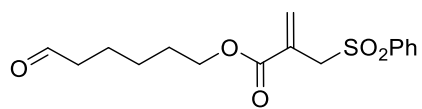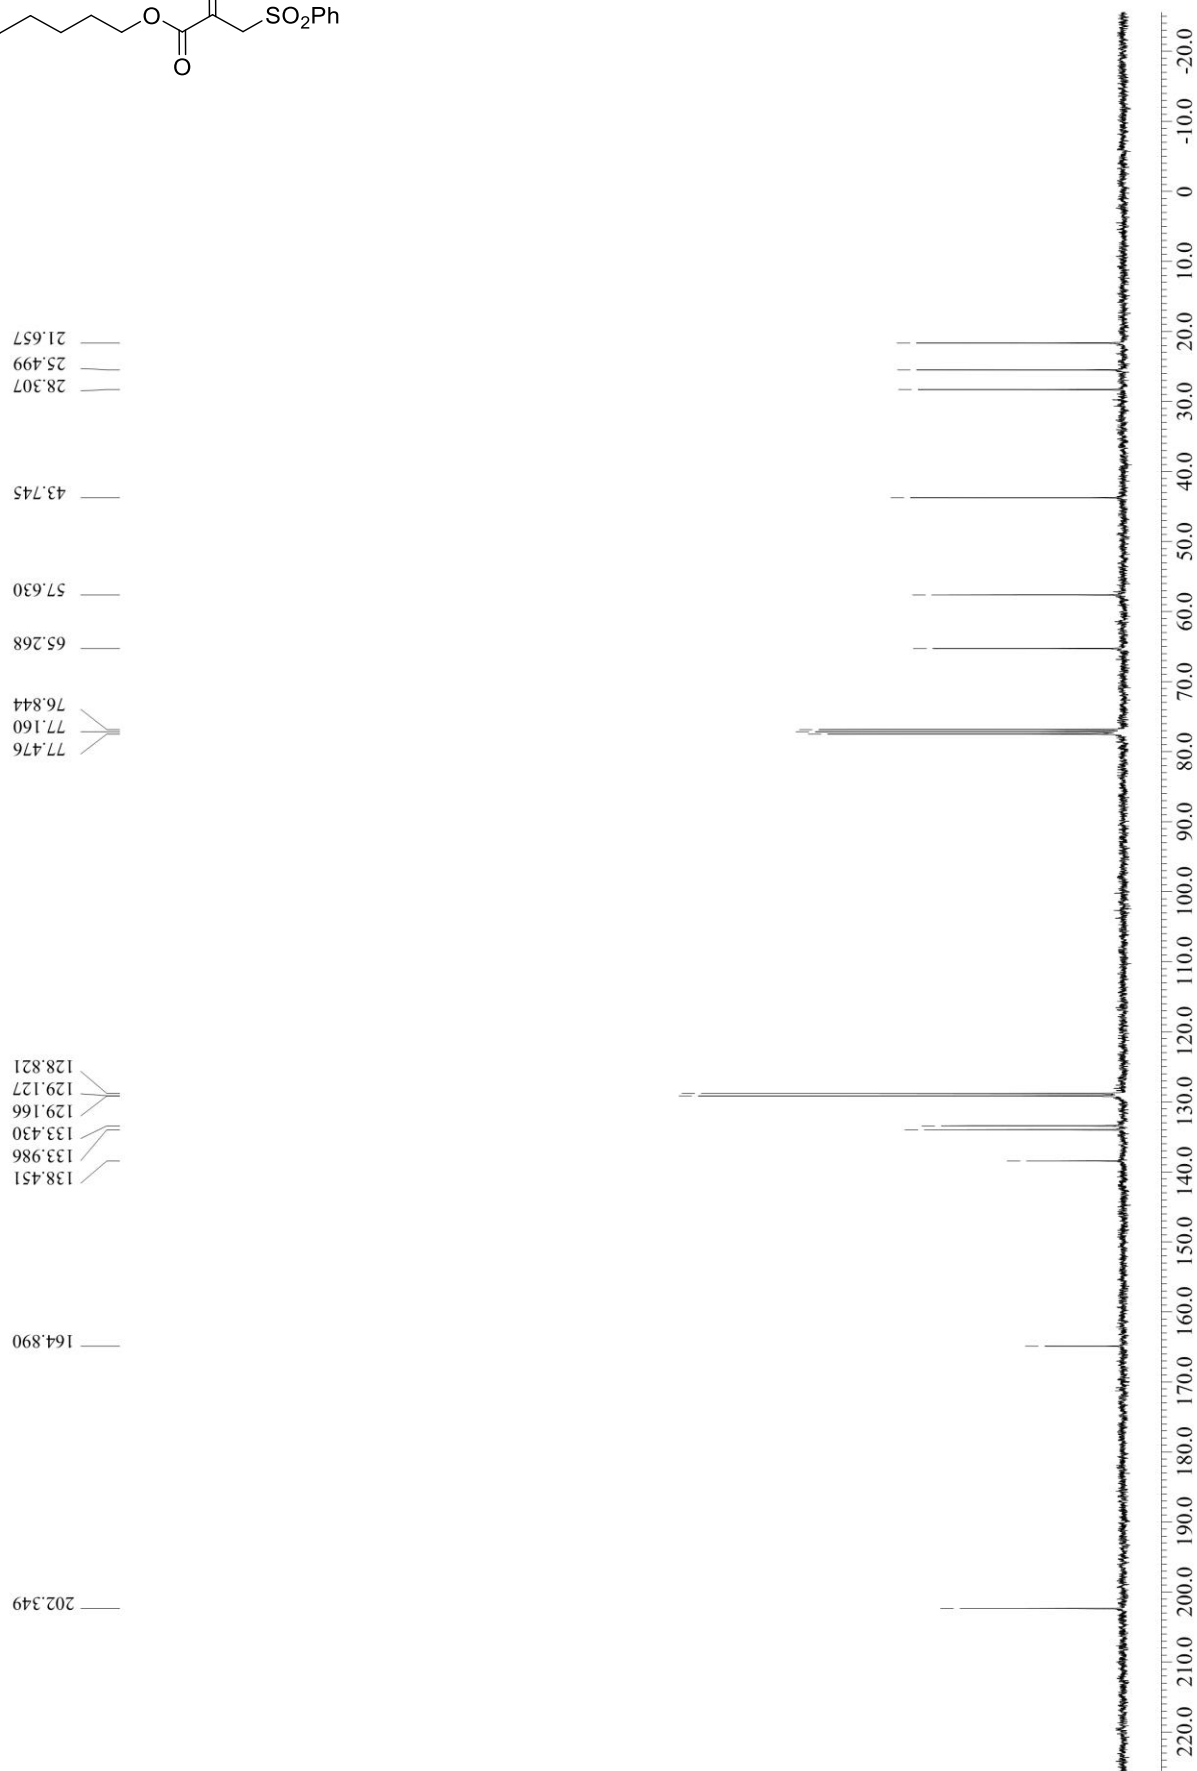

$^1\text{H}$  NMR of **8a** ( $\text{CDCl}_3$ , 400 MHz, 25 °C)

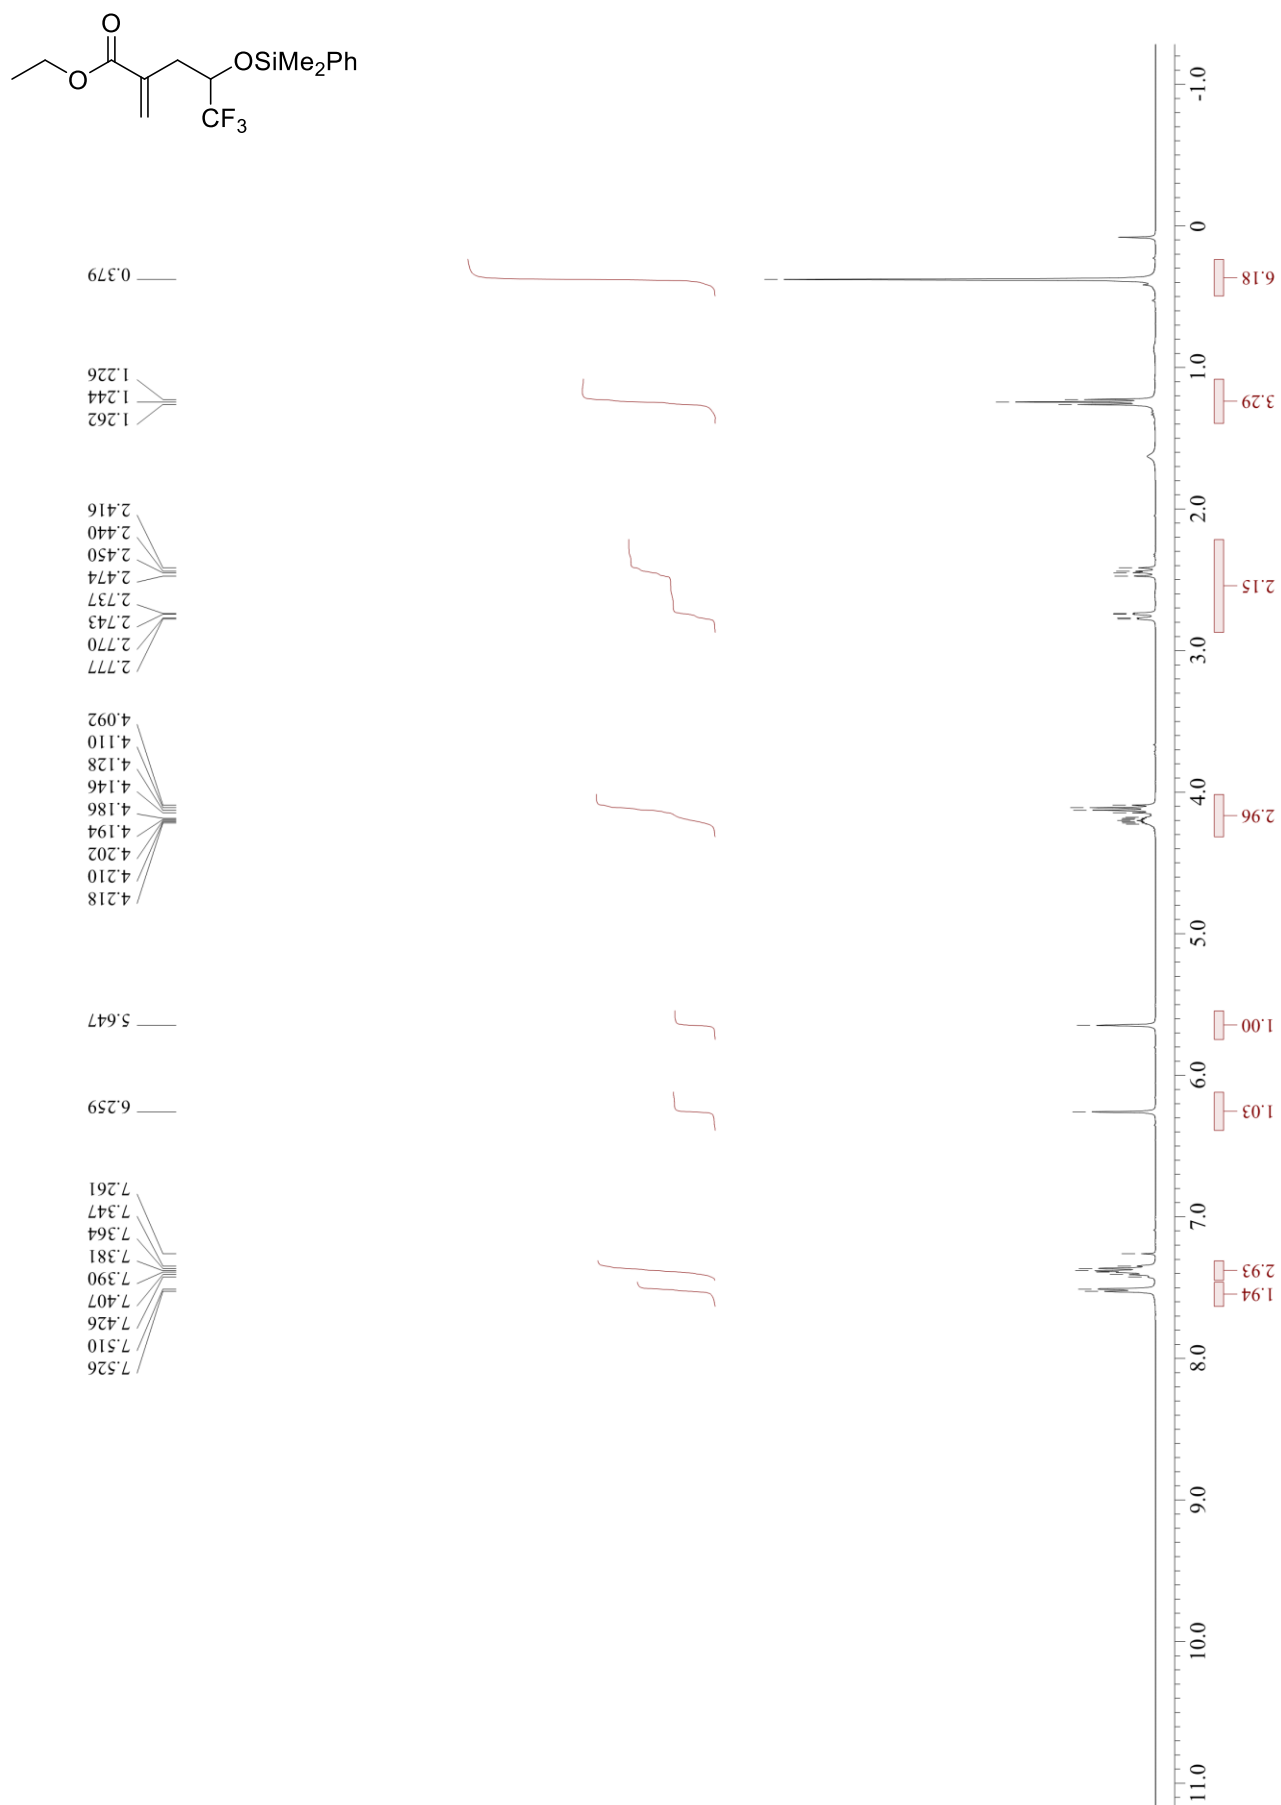

$^{13}\text{C}$  NMR of **8a** ( $\text{CDCl}_3$ , 100 MHz, 25 °C)

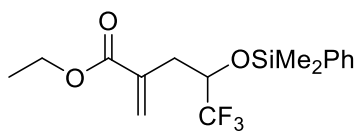

-1.275  
-1.466

14.201

34.603

60.956  
69.609  
69.915  
70.222  
70.529  
76.834  
77.160  
77.476

120.761  
123.579  
126.387  
127.977  
129.194  
129.951  
130.085  
133.804  
134.848  
136.142

166.356

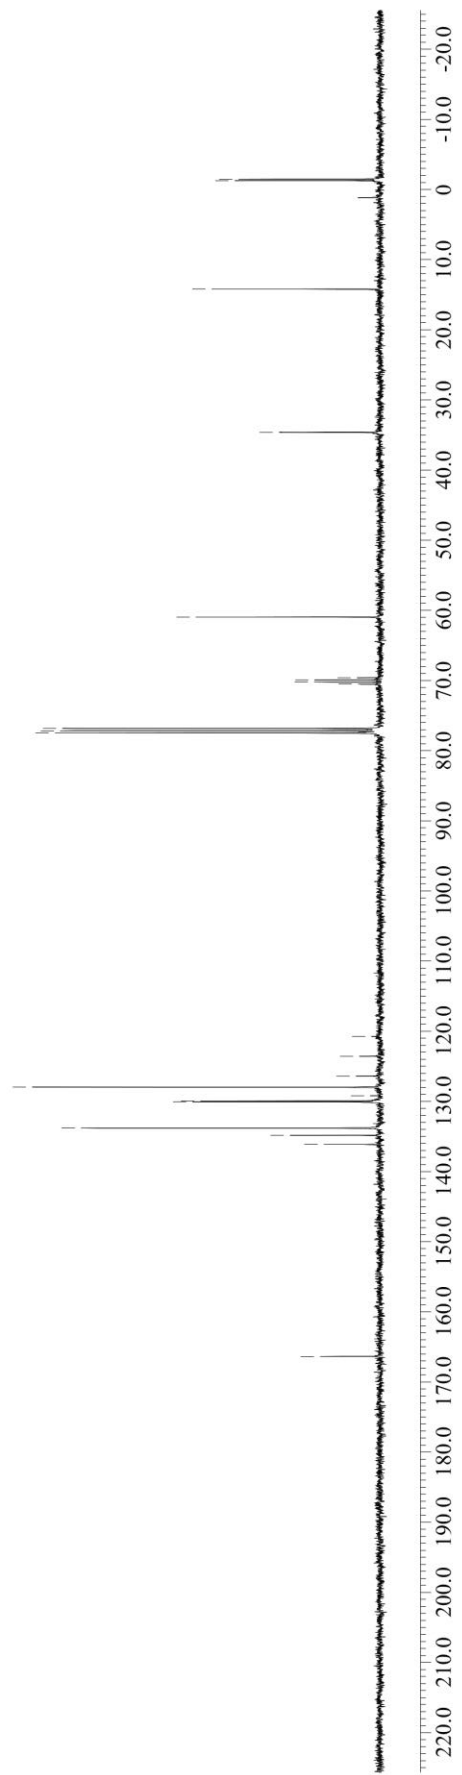

$^{19}\text{F}$  NMR of **8a** ( $\text{CDCl}_3$ , 375 MHz, 25 °C)

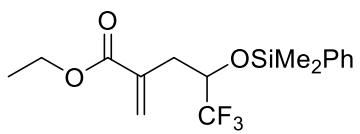

— -78.482

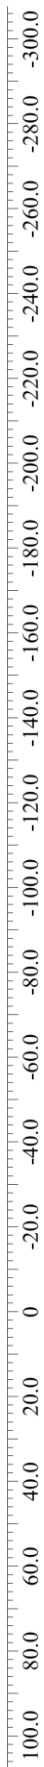

$^1\text{H}$  NMR of **9b'** ( $\text{CDCl}_3$ , 400 MHz, 25  $^\circ\text{C}$ )

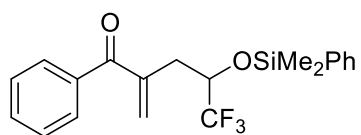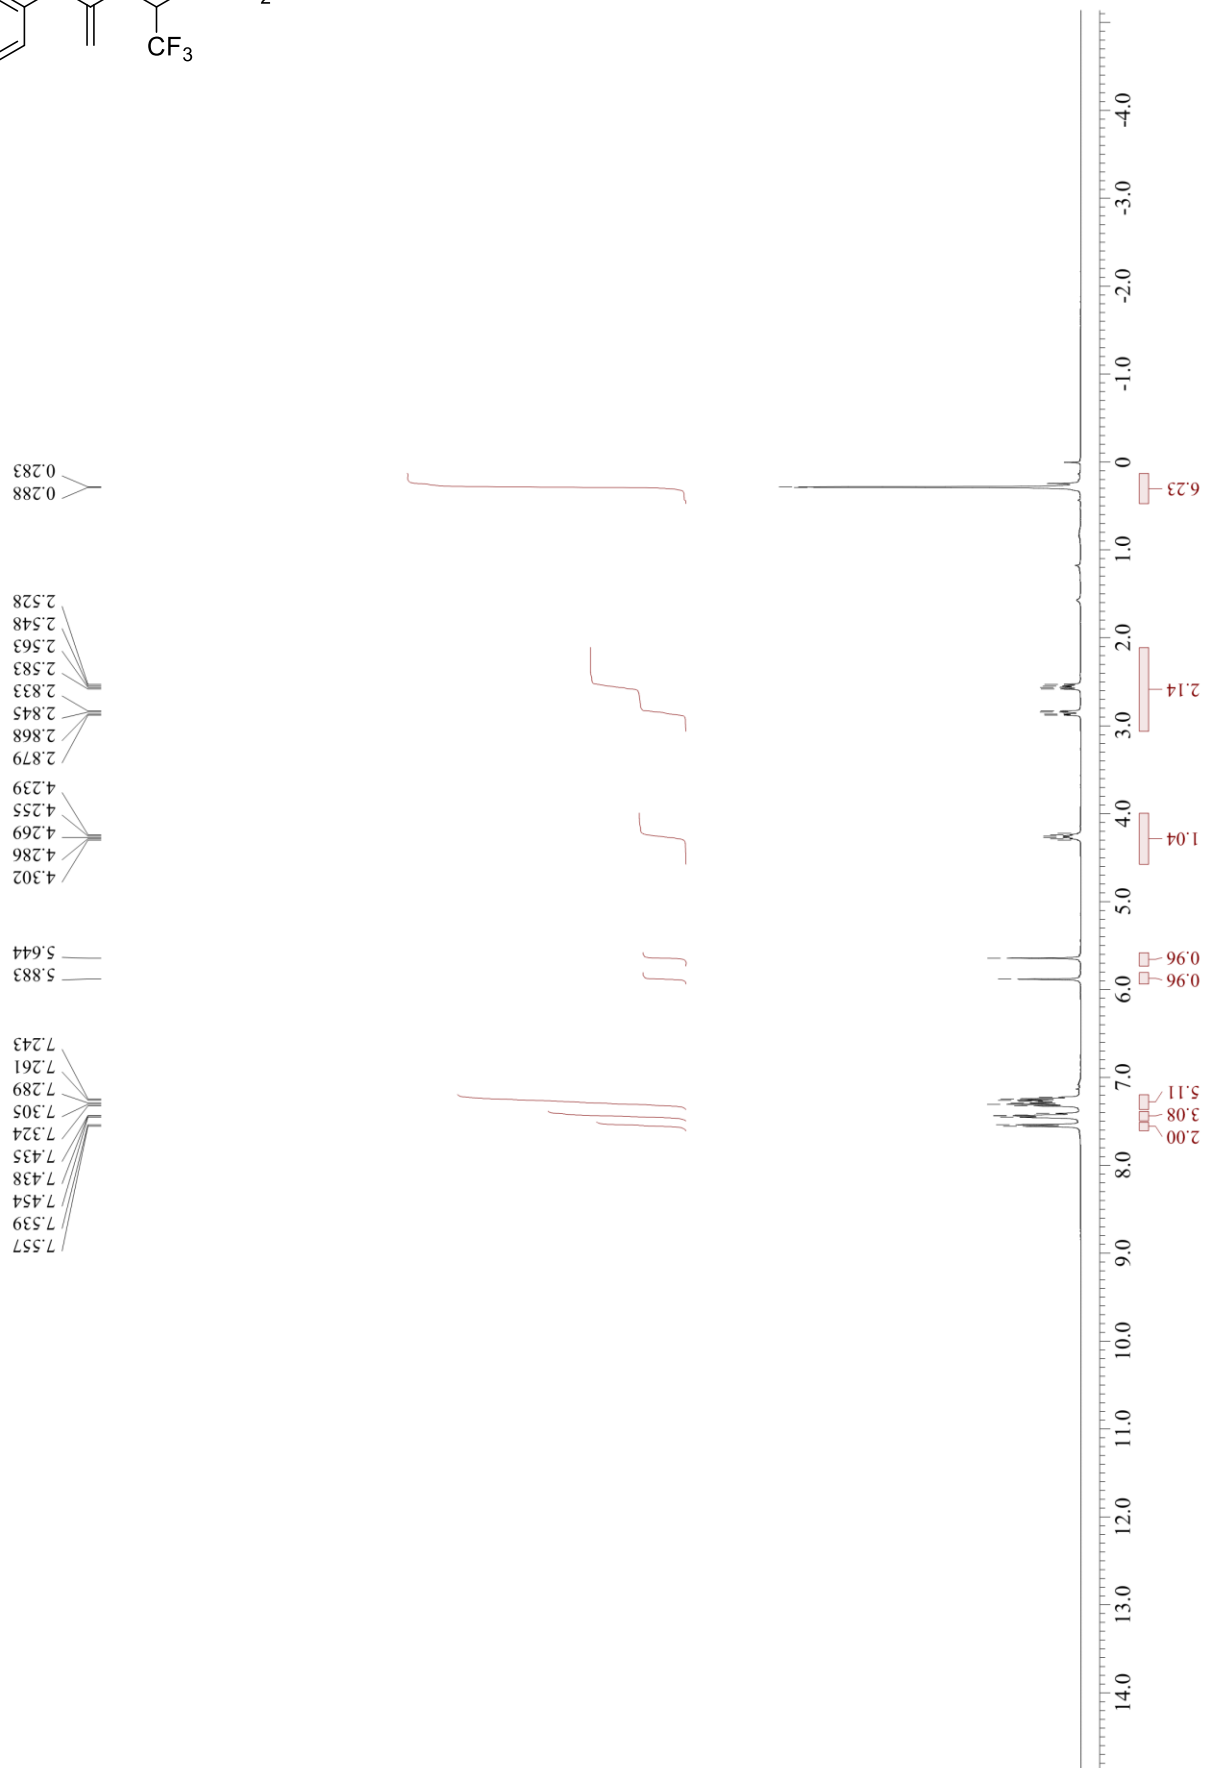

$^{13}\text{C}$  NMR of **9b'** ( $\text{CDCl}_3$ , 100 MHz, 25 °C)

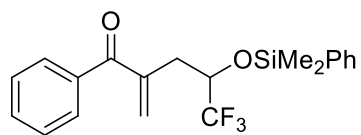

-1.236  
-1.658

34.871

69.523  
69.829  
70.136  
70.443  
76.844  
77.160  
77.476

120.848  
123.665  
126.482  
127.824  
127.968  
128.303  
129.300  
129.597  
130.057  
131.389  
132.328  
133.689  
136.487  
137.455  
141.748

197.404

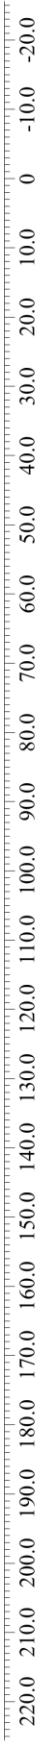



$^{19}\text{F}$  NMR of **9b'** ( $\text{CDCl}_3$ , 100 MHz, 25 °C)

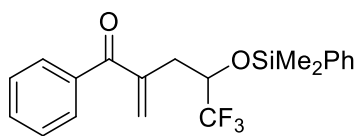

-77.619  
-77.603

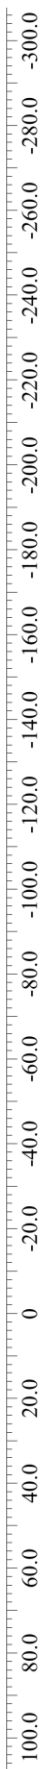

$^1\text{H}$  NMR of **9a** ( $\text{CDCl}_3$ , 400 MHz, 25 °C)

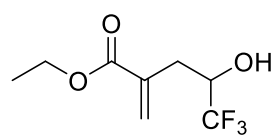

1.306  
1.324  
1.342

2.571  
2.595  
2.607  
2.631  
2.742  
2.747  
2.778  
2.783

3.633

4.103  
4.112  
4.119  
4.125  
4.135  
4.223  
4.240  
4.259  
4.276

5.803

6.345

7.261

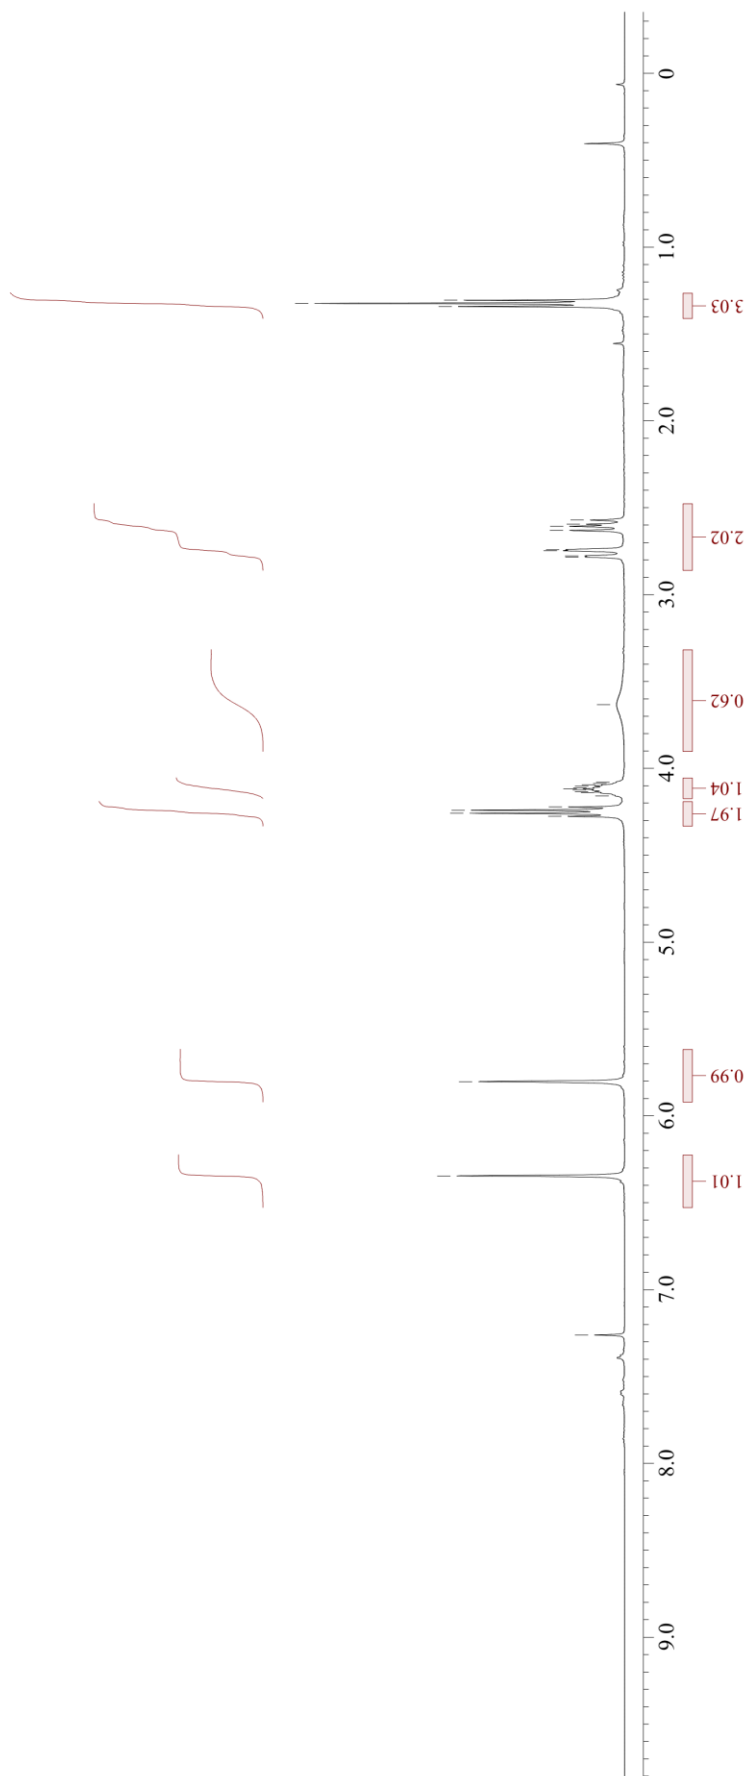

$^{13}\text{C}$  NMR of **9a** ( $\text{CDCl}_3$ , 100 MHz, 25 °C)

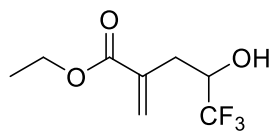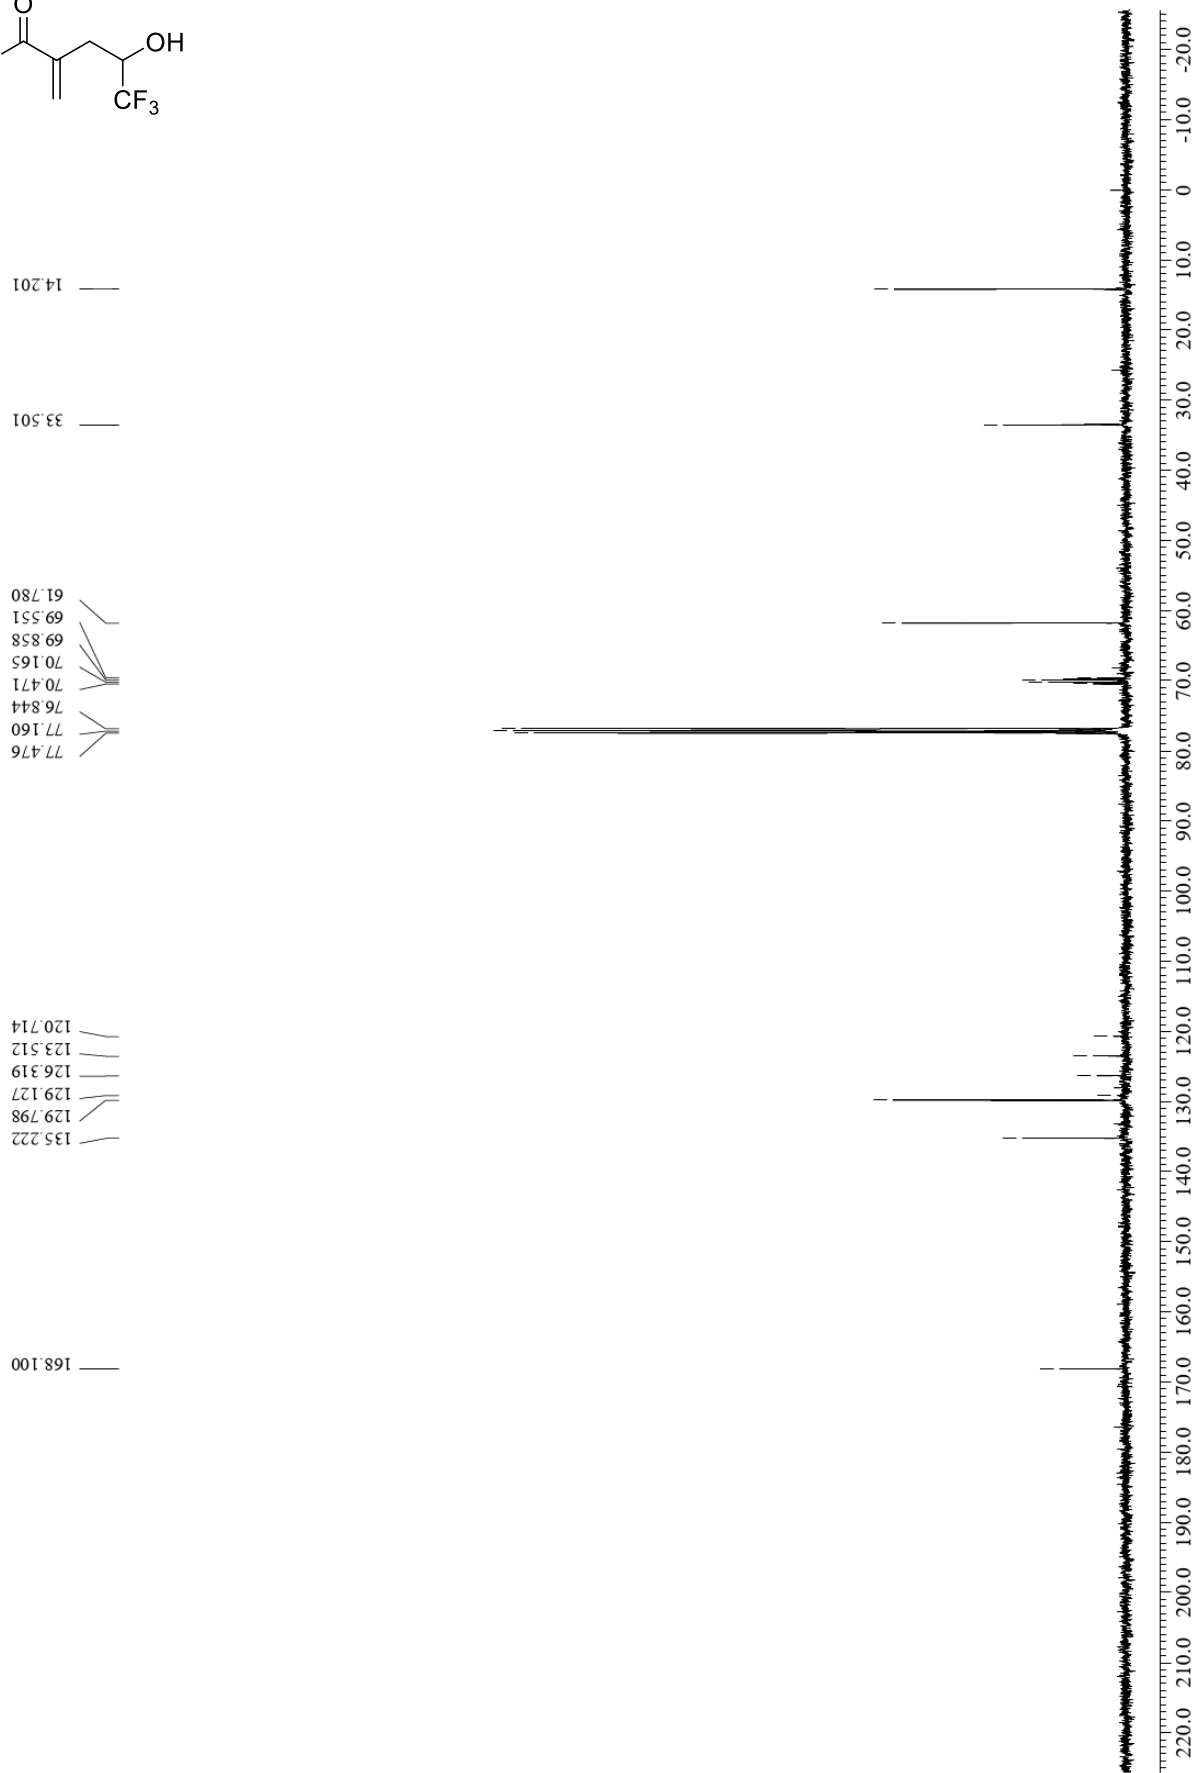

$^{19}\text{F}$  NMR of **9a** ( $\text{CDCl}_3$ , 375 MHz, 25 °C)

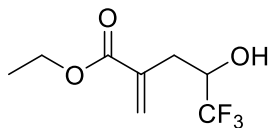

-79.560  
-79.576

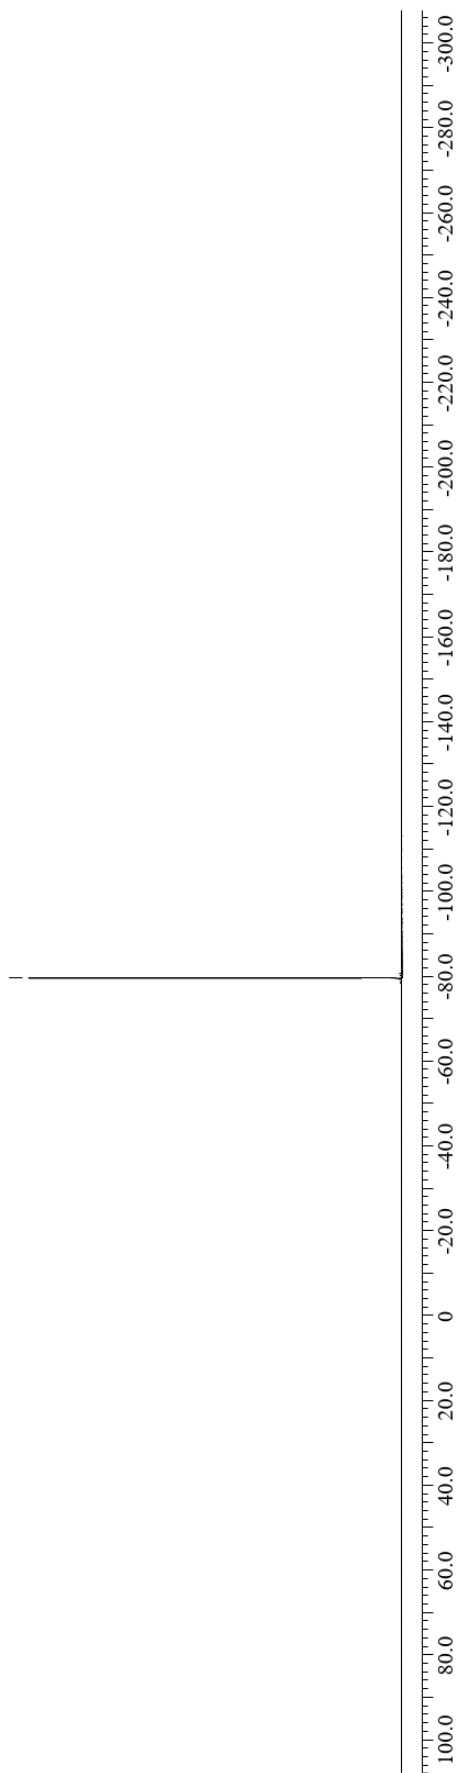

$^1\text{H}$  NMR of **9b** ( $\text{CDCl}_3$ , 400 MHz, 25 °C)

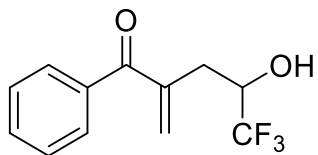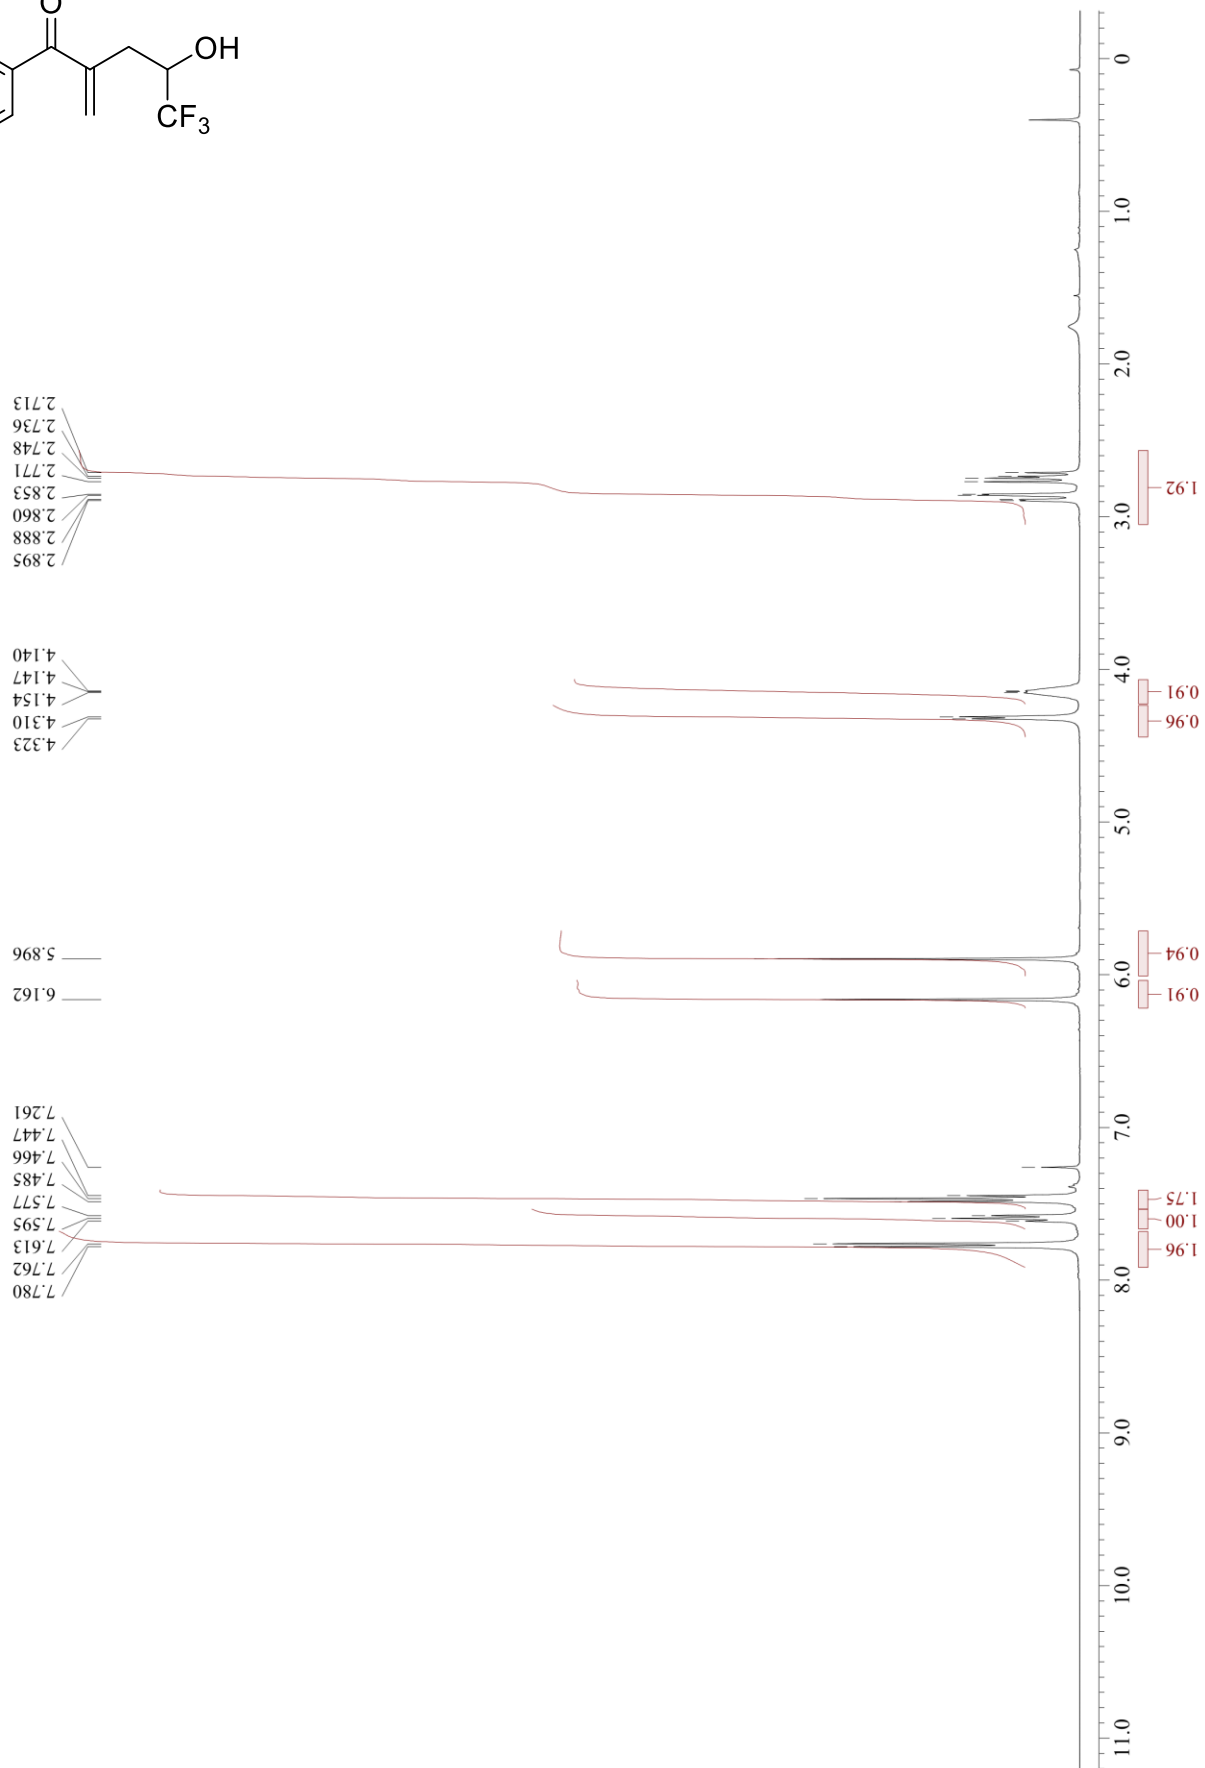

$^{13}\text{C}$  NMR of **9b** ( $\text{CDCl}_3$ , 100 MHz, 25 °C)

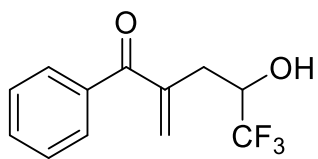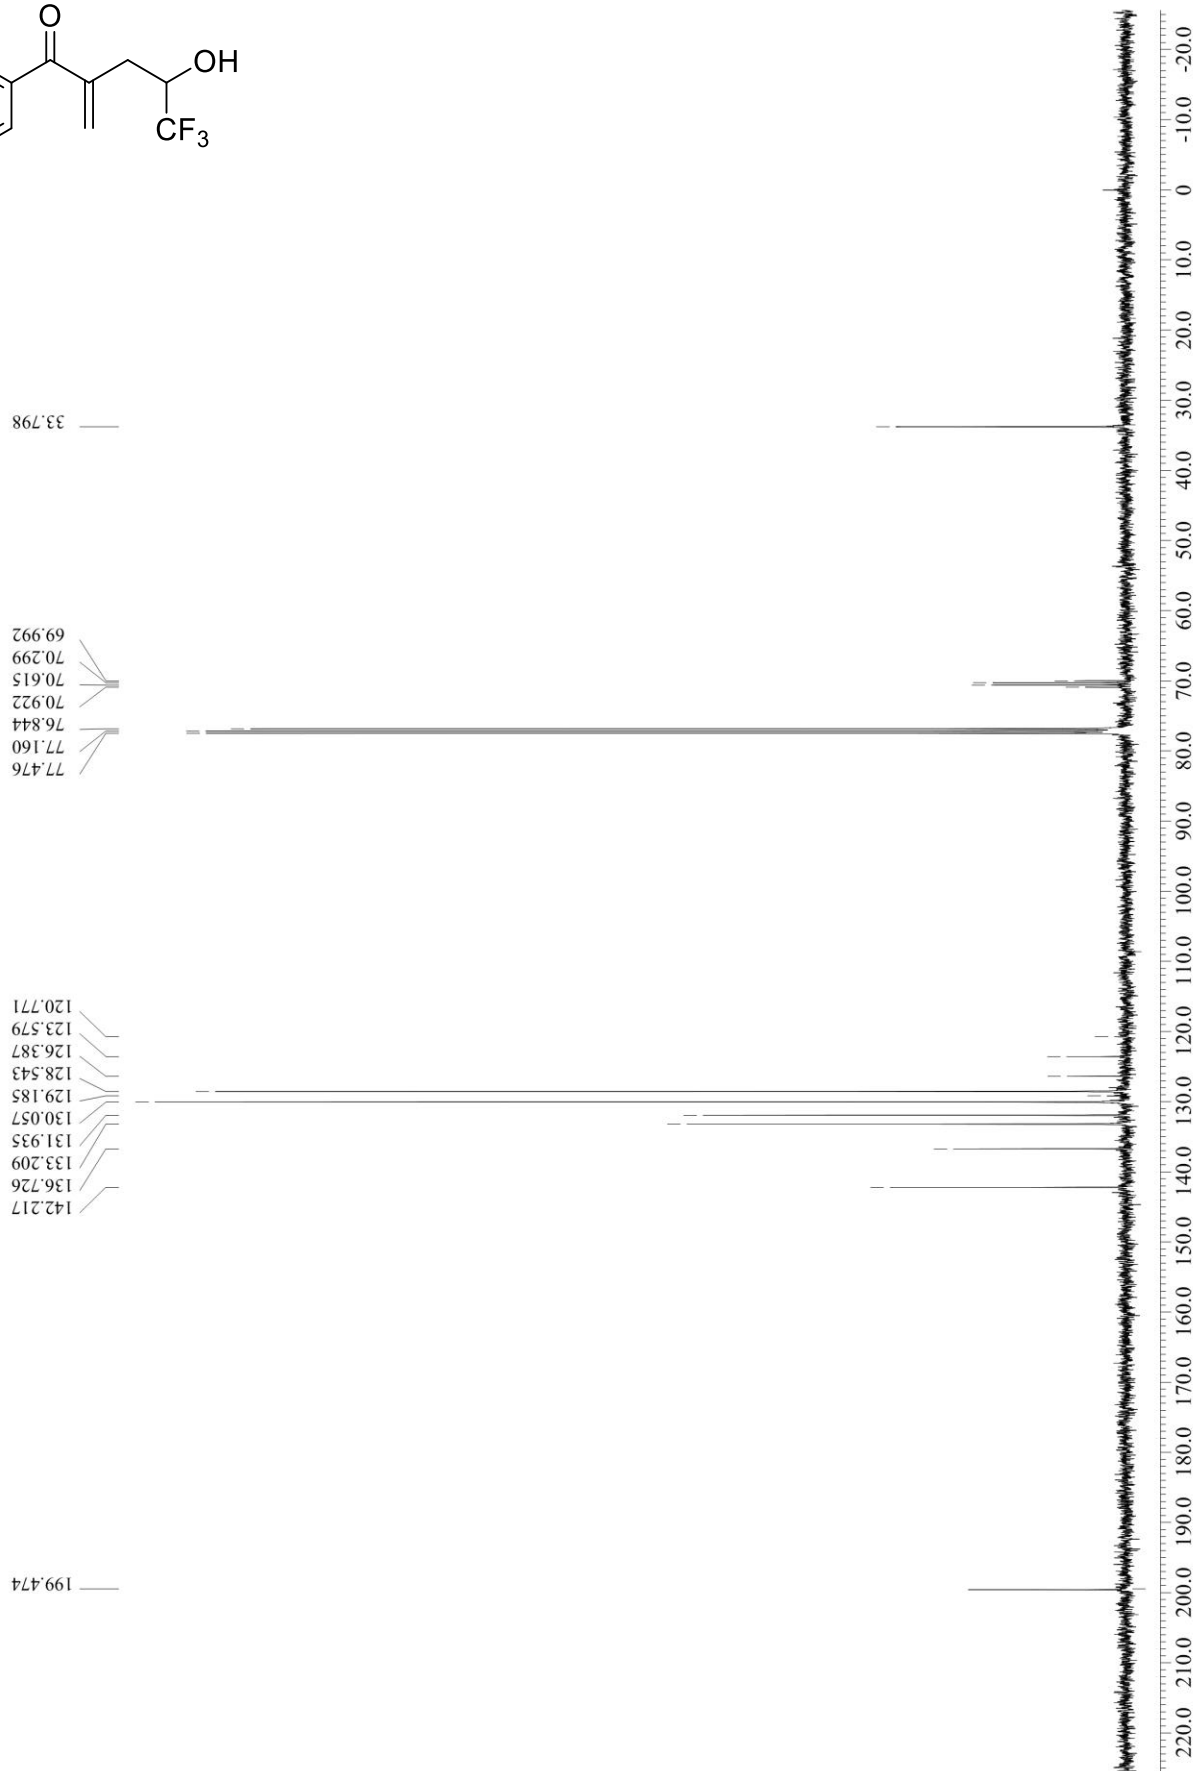

$^{19}\text{F}$  NMR of **9b** ( $\text{CDCl}_3$ , 375 MHz, 25 °C)

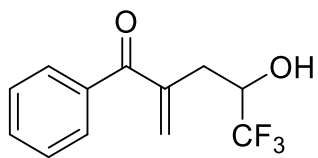

-79.330  
-79.346

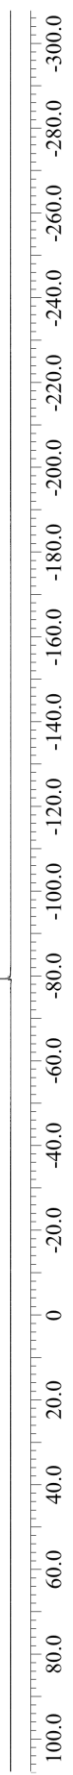

$^1\text{H}$  NMR of **9c** ( $\text{CDCl}_3$ , 400 MHz, 25 °C)

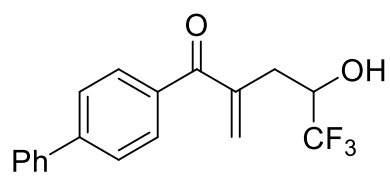

2.741  
2.765  
2.777  
2.800  
2.880  
2.886  
2.915  
2.922

4.170  
4.181  
4.377  
4.389

5.951  
6.181

7.261  
7.403  
7.422  
7.439  
7.470  
7.489  
7.506  
7.626  
7.644  
7.681  
7.701  
7.866  
7.886

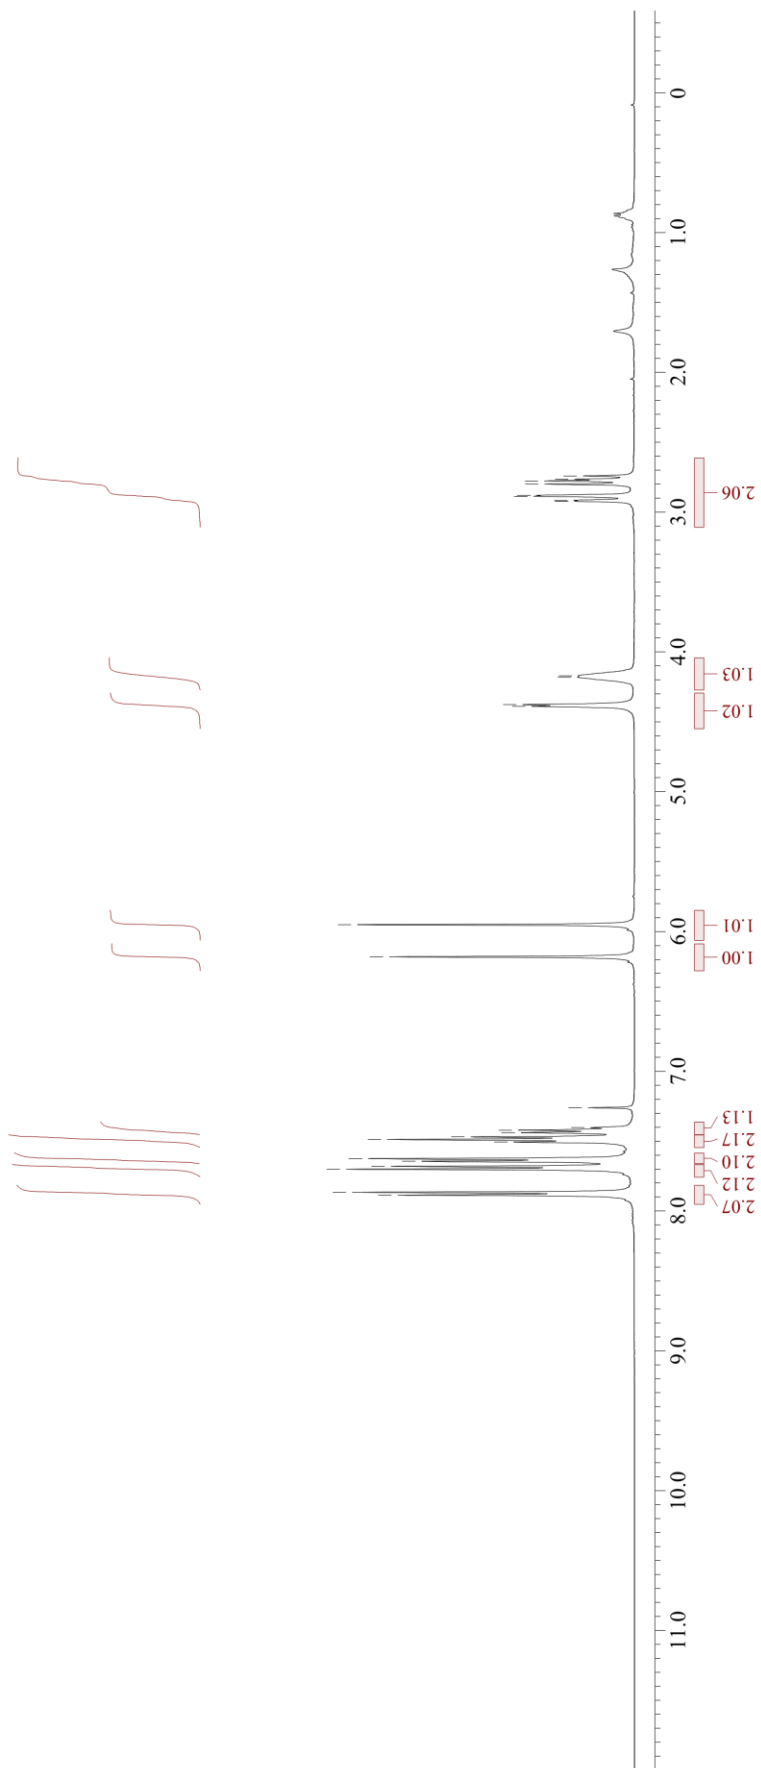



$^{13}\text{C}$  NMR of **9c** ( $\text{CDCl}_3$ , 100 MHz, 25 °C)

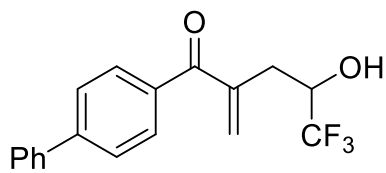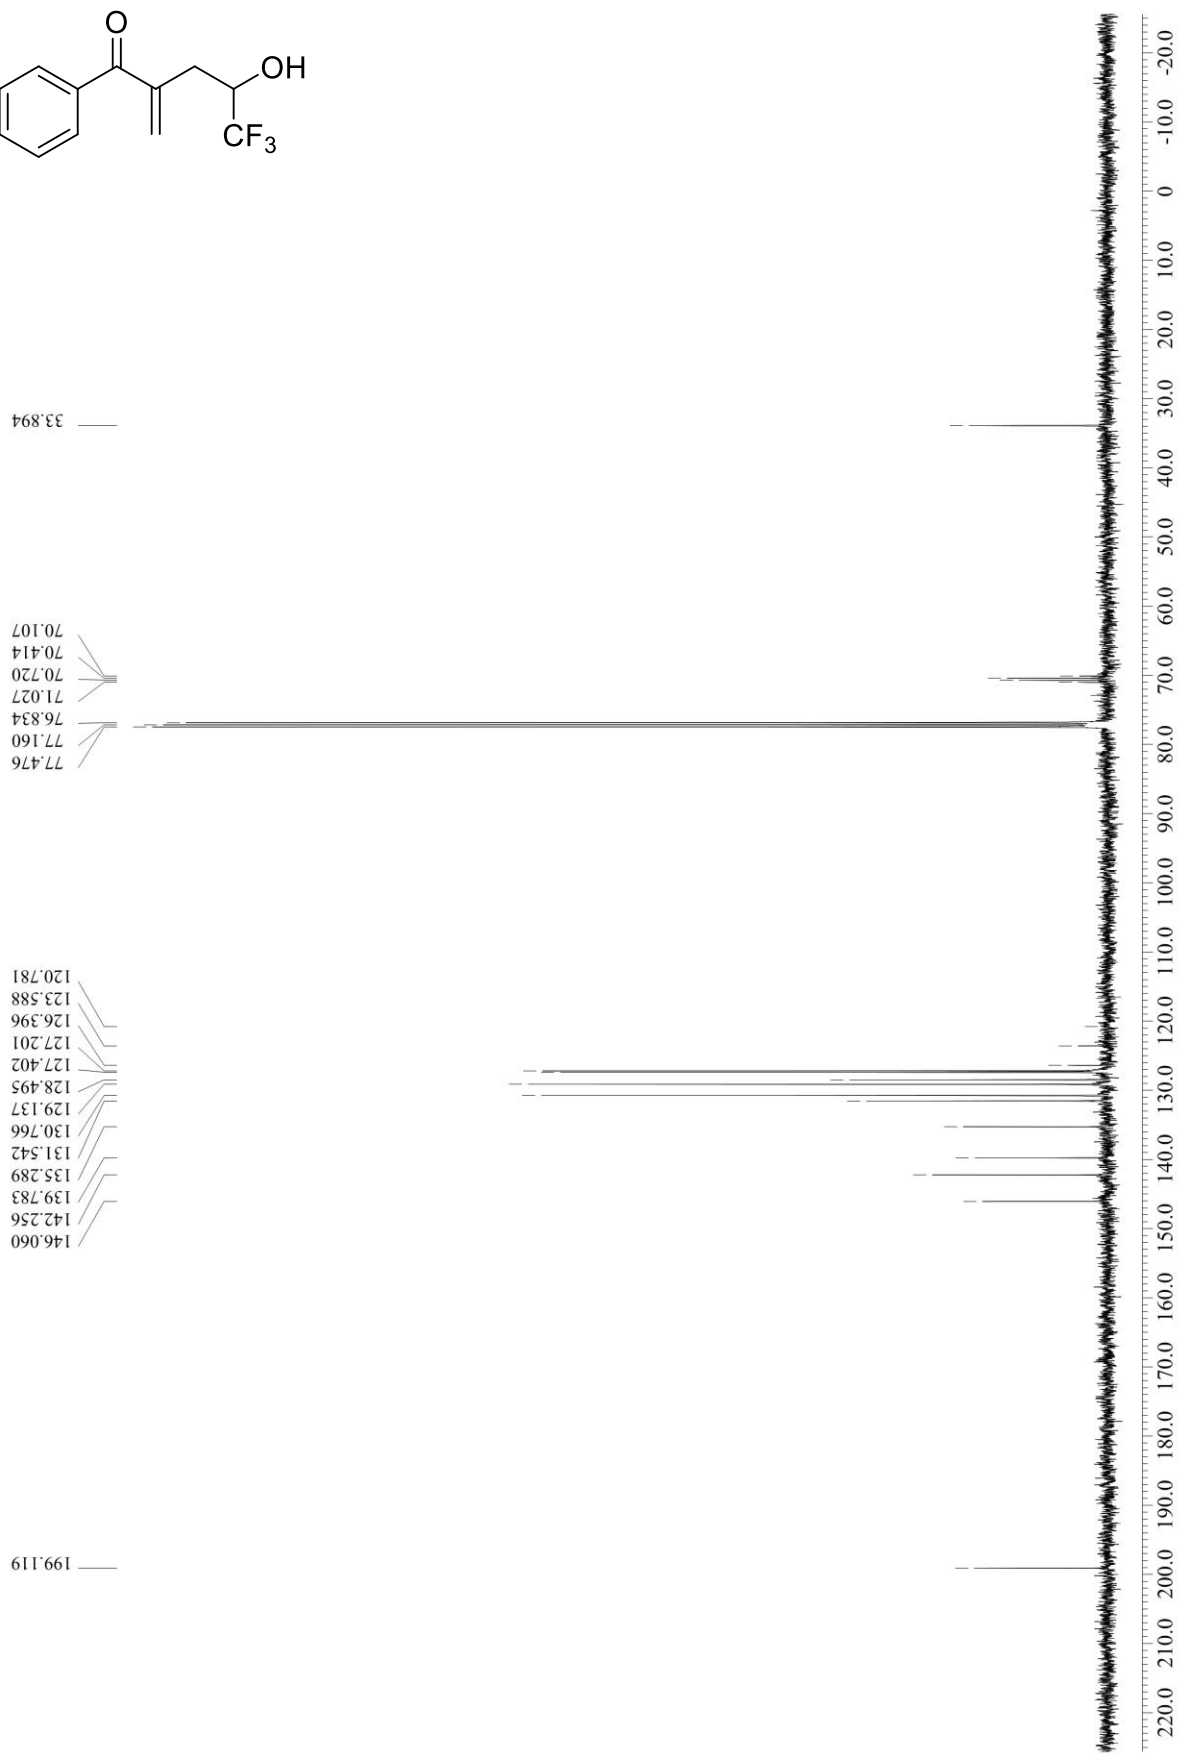

$^{19}\text{F}$  NMR of **9c** ( $\text{CDCl}_3$ , 375 MHz, 25 °C)

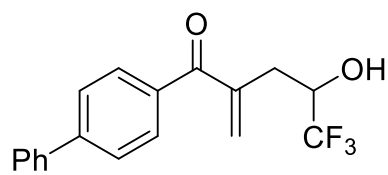

-79.283  
-79.298

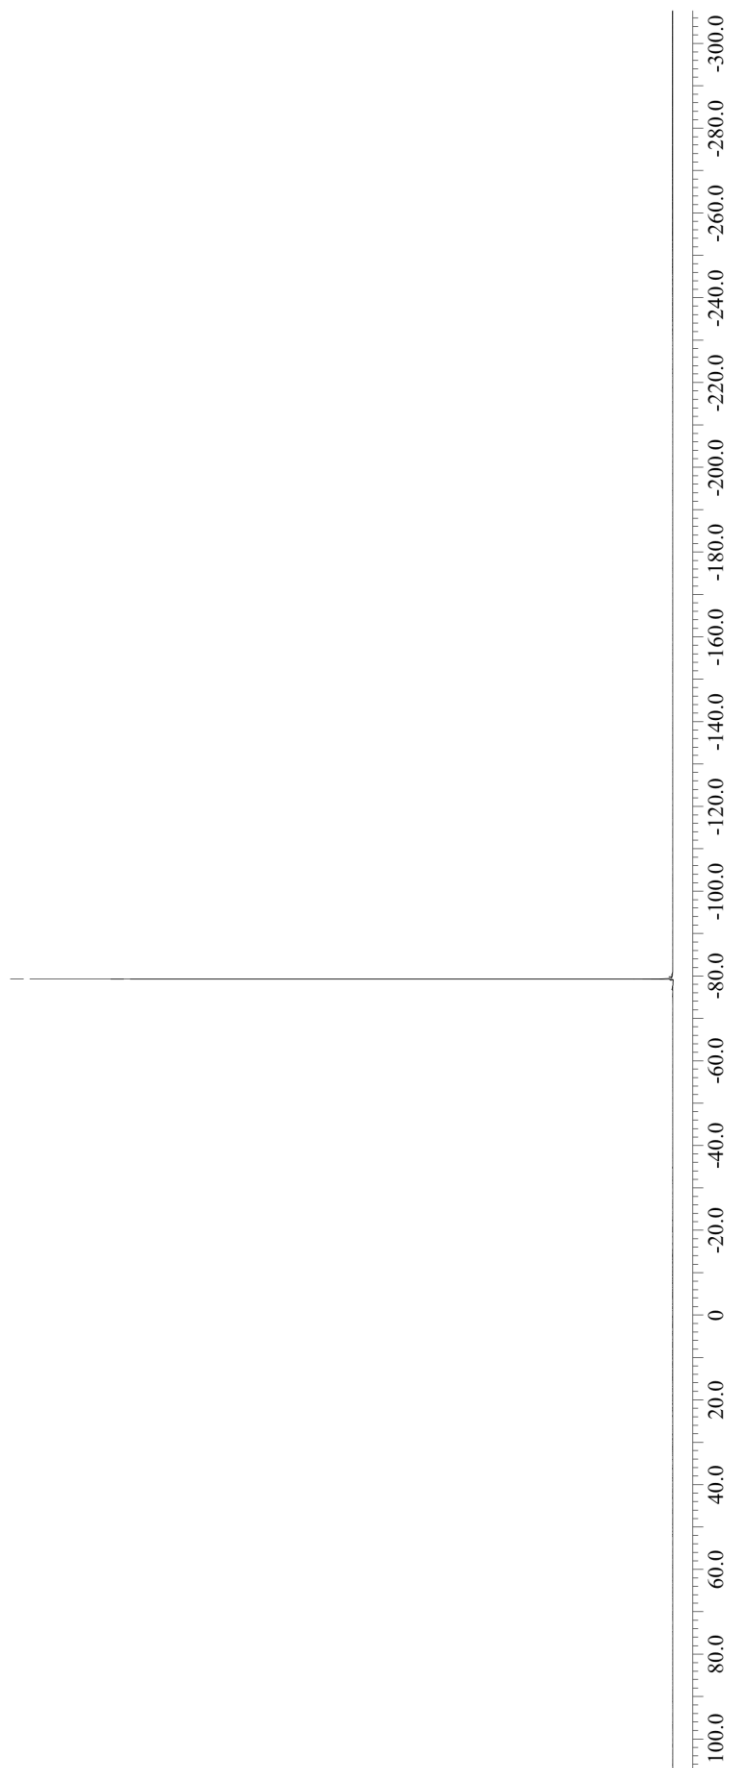

$^1\text{H}$  NMR of **9d** ( $\text{CDCl}_3$ , 400 MHz, 25 °C)

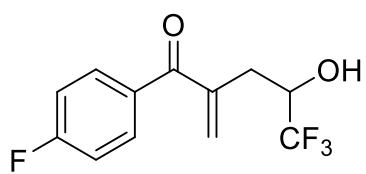

2.889  
2.852  
2.759  
2.737  
2.702

4.148

5.856

6.144

7.844  
7.831  
7.823  
7.809  
7.261  
7.167  
7.146  
7.125

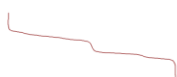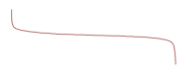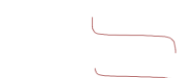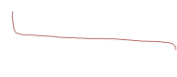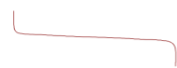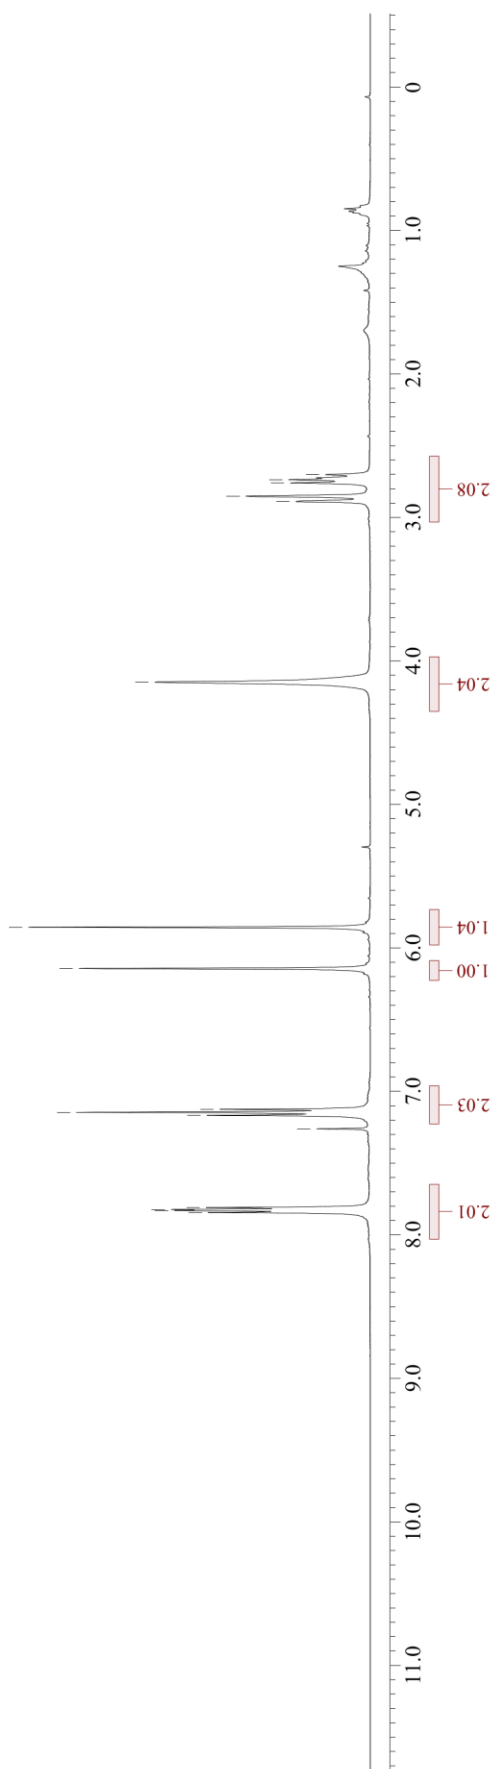

$^{13}\text{C}$  NMR of **9d** ( $\text{CDCl}_3$ , 100 MHz, 25 °C)

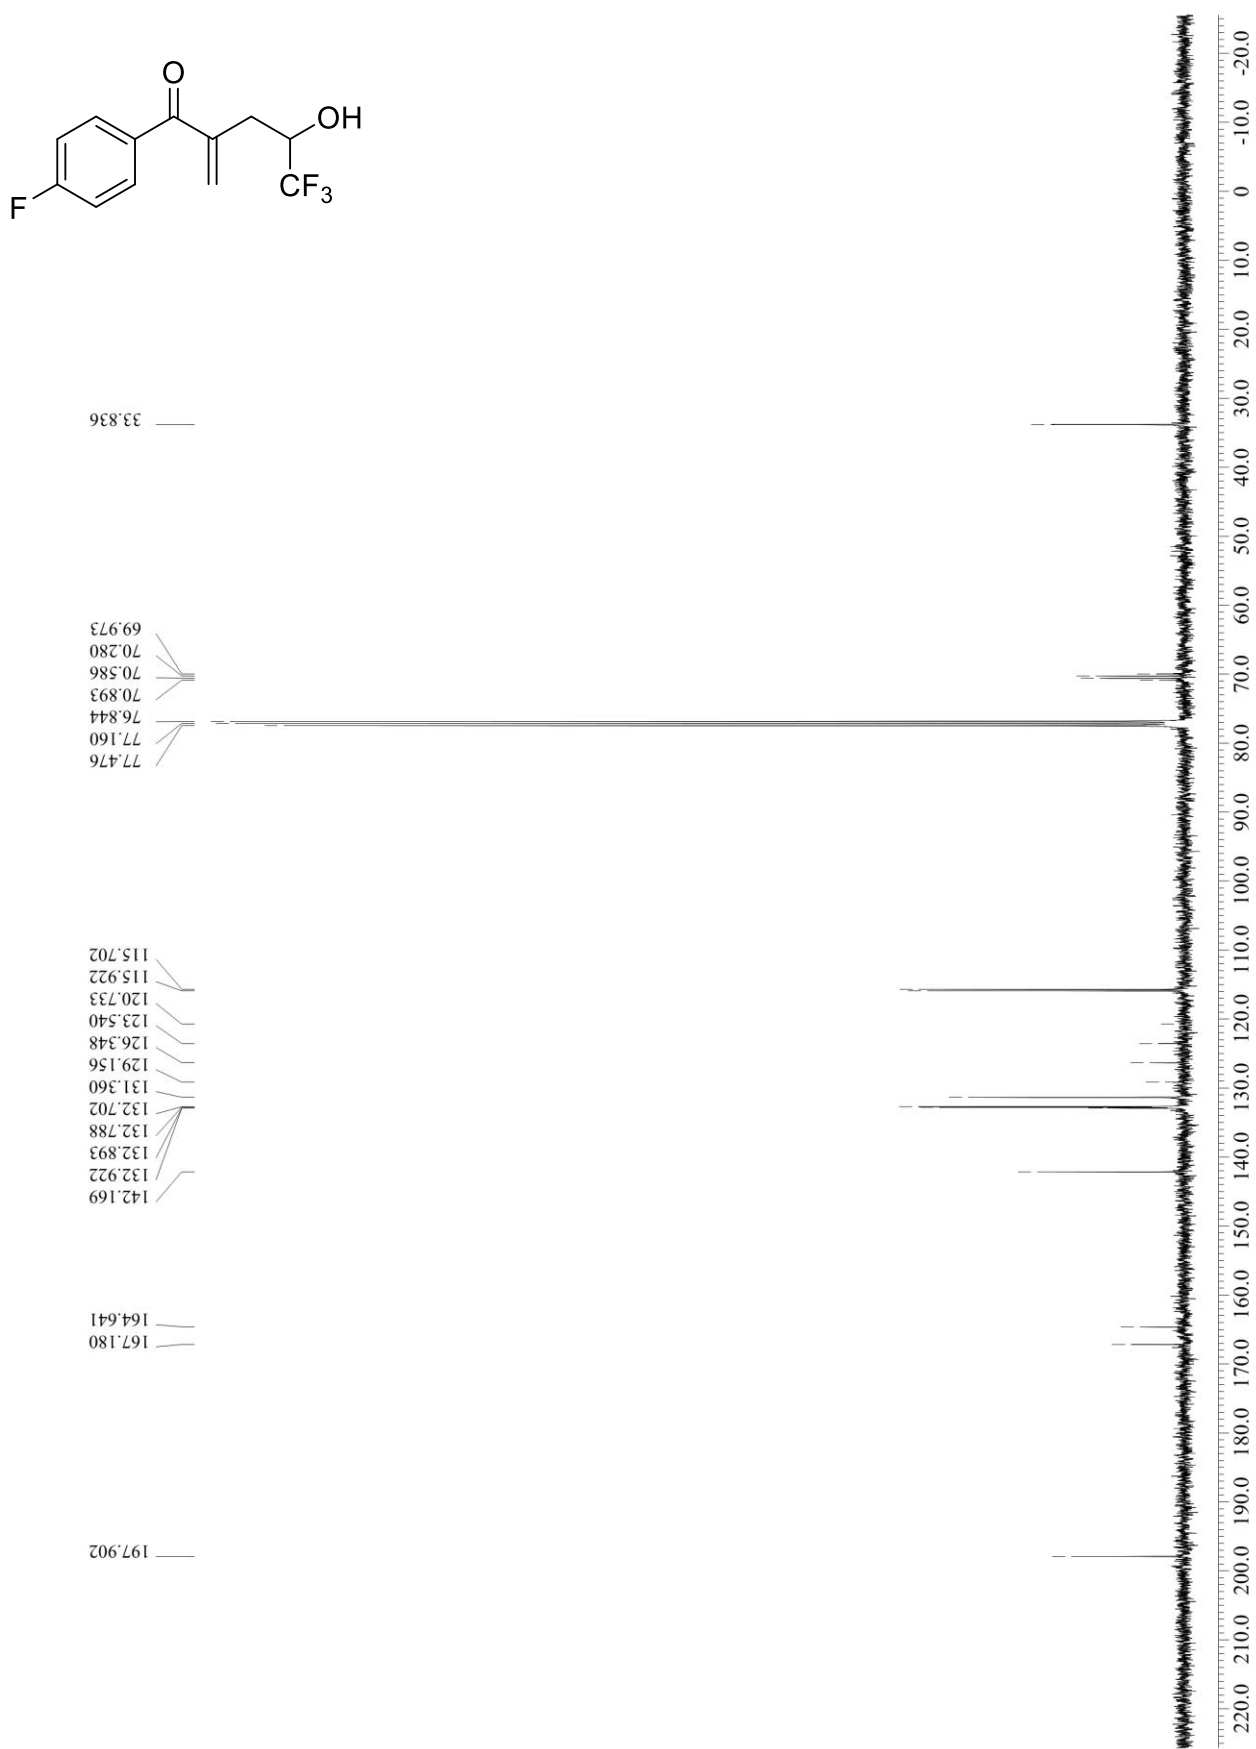

$^{19}\text{F}$  NMR of **9d** ( $\text{CDCl}_3$ , 375 MHz, 25 °C)

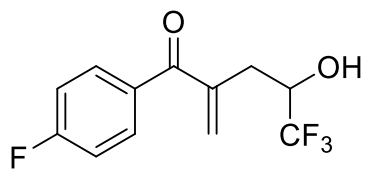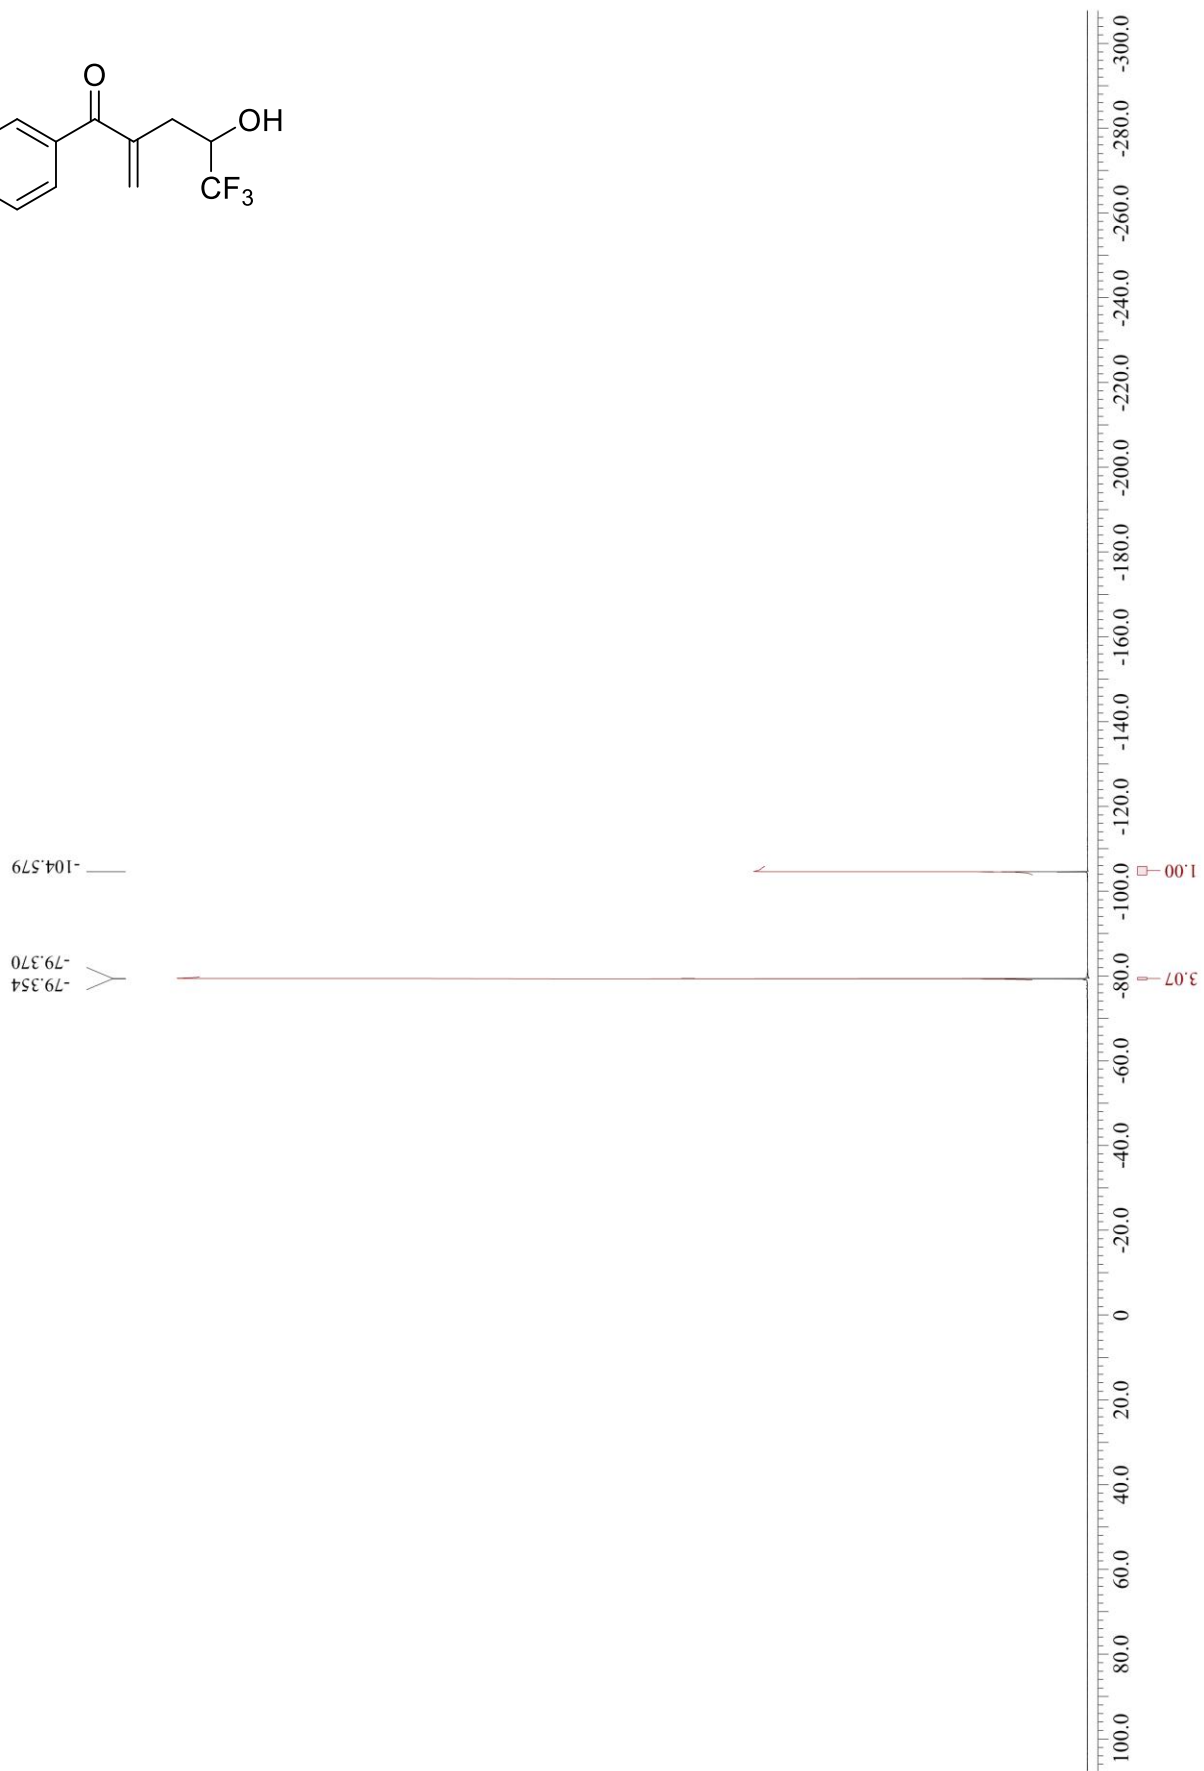

$^1\text{H}$  NMR of **9e** ( $\text{CDCl}_3$ , 400 MHz, 25 °C)

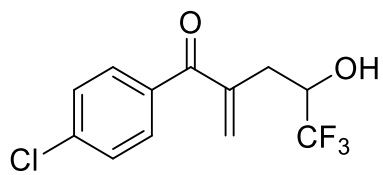

2.711  
2.735  
2.746  
2.770  
2.855  
2.862  
2.890  
2.897

3.961  
4.151

5.870  
6.165

7.261  
7.440  
7.461  
7.720  
7.741

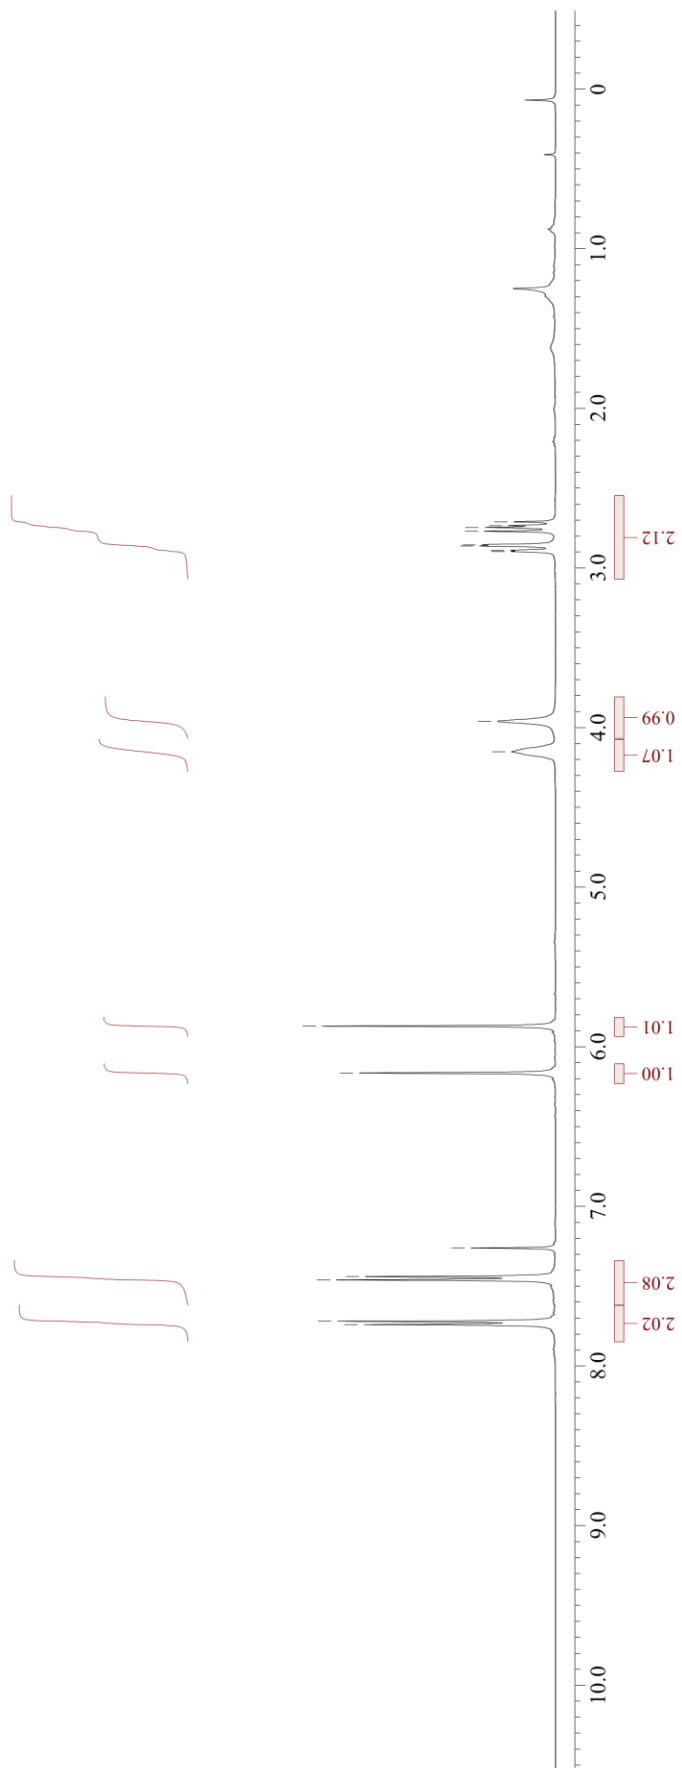

$^{13}\text{C}$  NMR of **9e** ( $\text{CDCl}_3$ , 100 MHz, 25 °C)

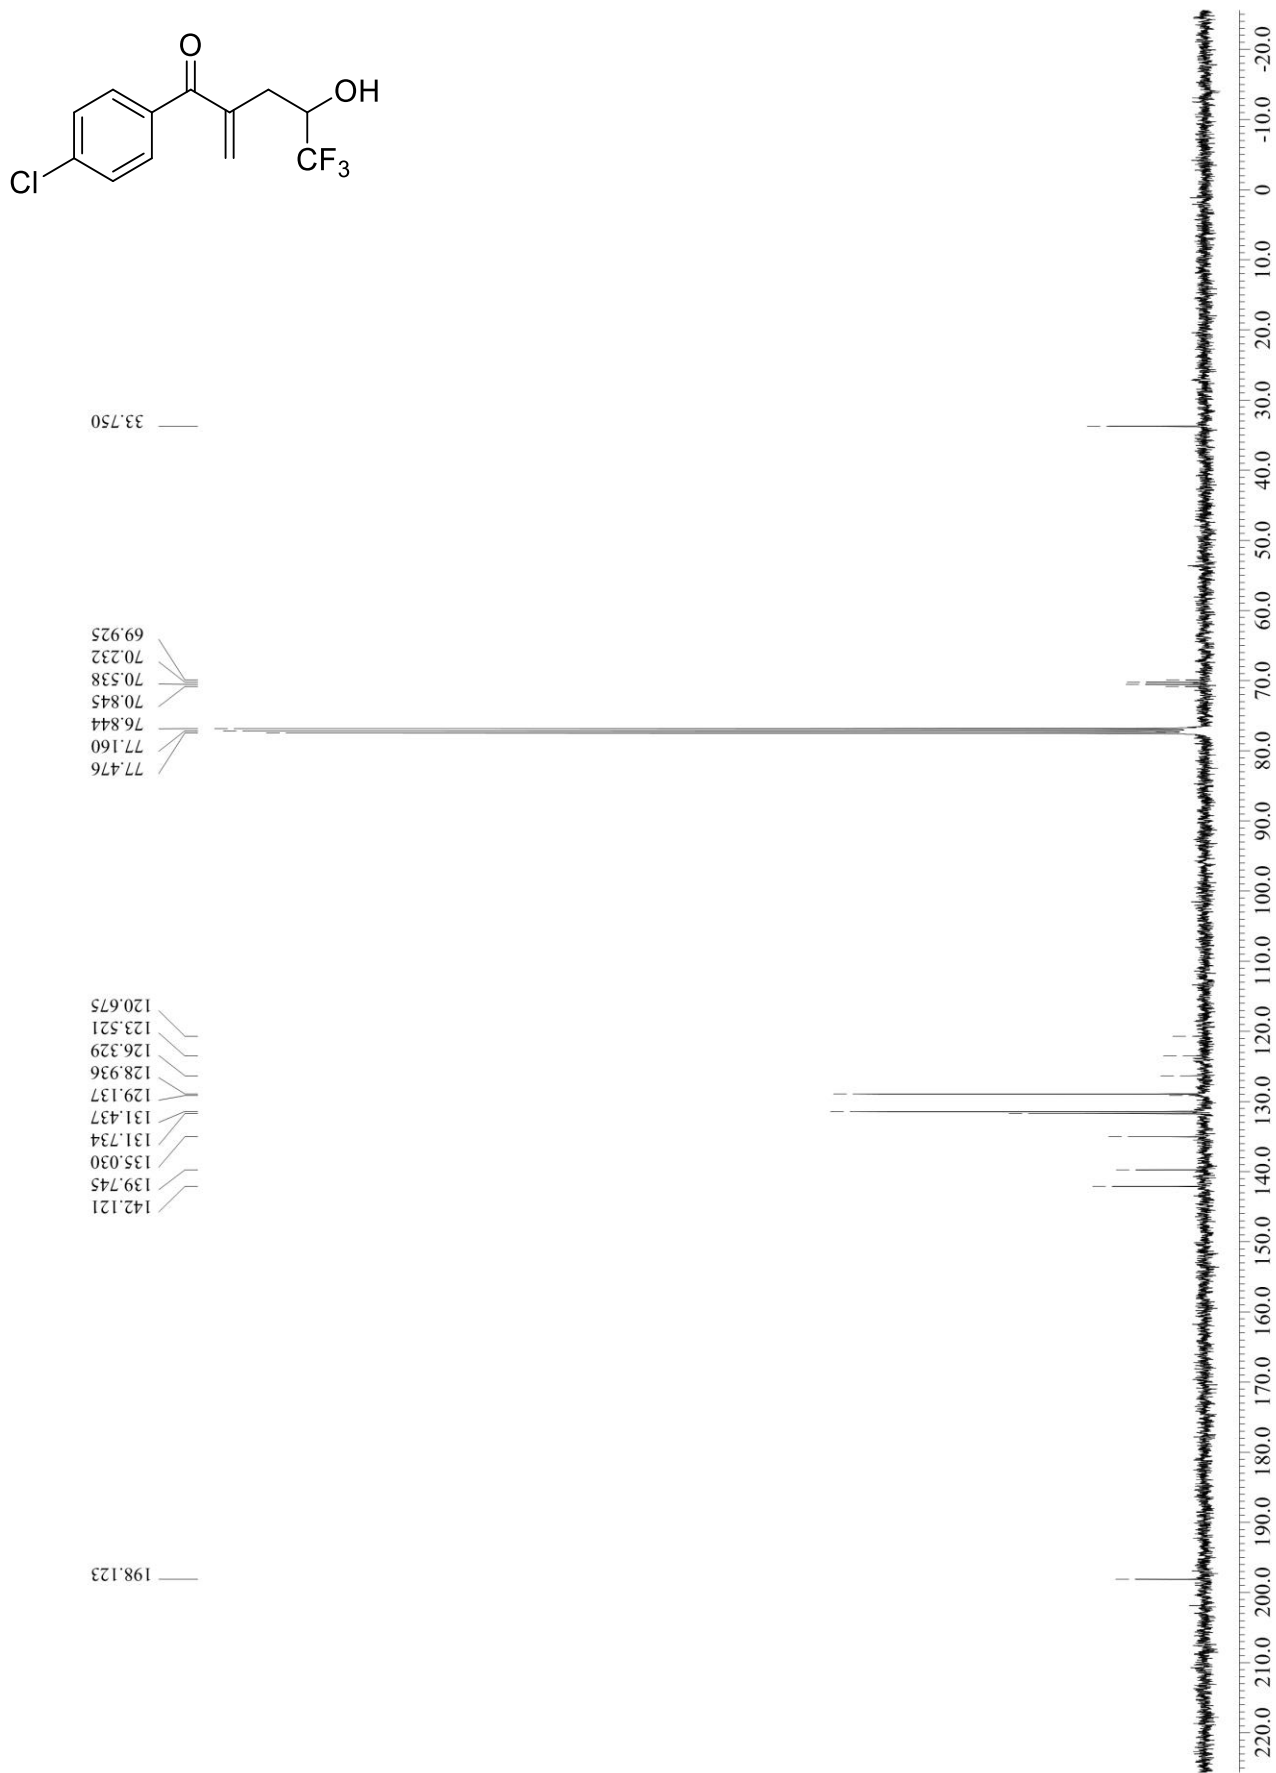

$^{19}\text{F}$  NMR of **9e** ( $\text{CDCl}_3$ , 375 MHz, 25 °C)

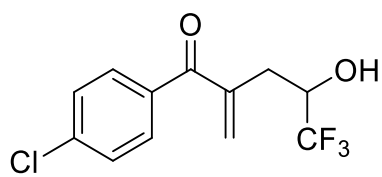

-79.346  
-79.370

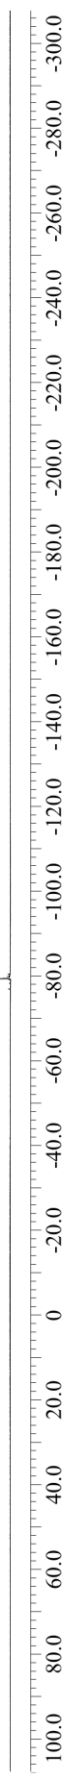



$^1\text{H}$  NMR of **9f** ( $\text{CDCl}_3$ , 400 MHz, 25 °C)

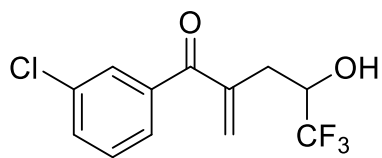

4.190  
4.174  
4.167  
4.159  
4.151  
4.144  
4.137  
4.129  
3.853  
3.838  
2.905  
2.898  
2.869  
2.862  
2.770  
2.746  
2.735  
2.711

6.188  
5.896

7.277  
7.643  
7.623  
7.566  
7.546  
7.428  
7.408  
7.389  
7.261

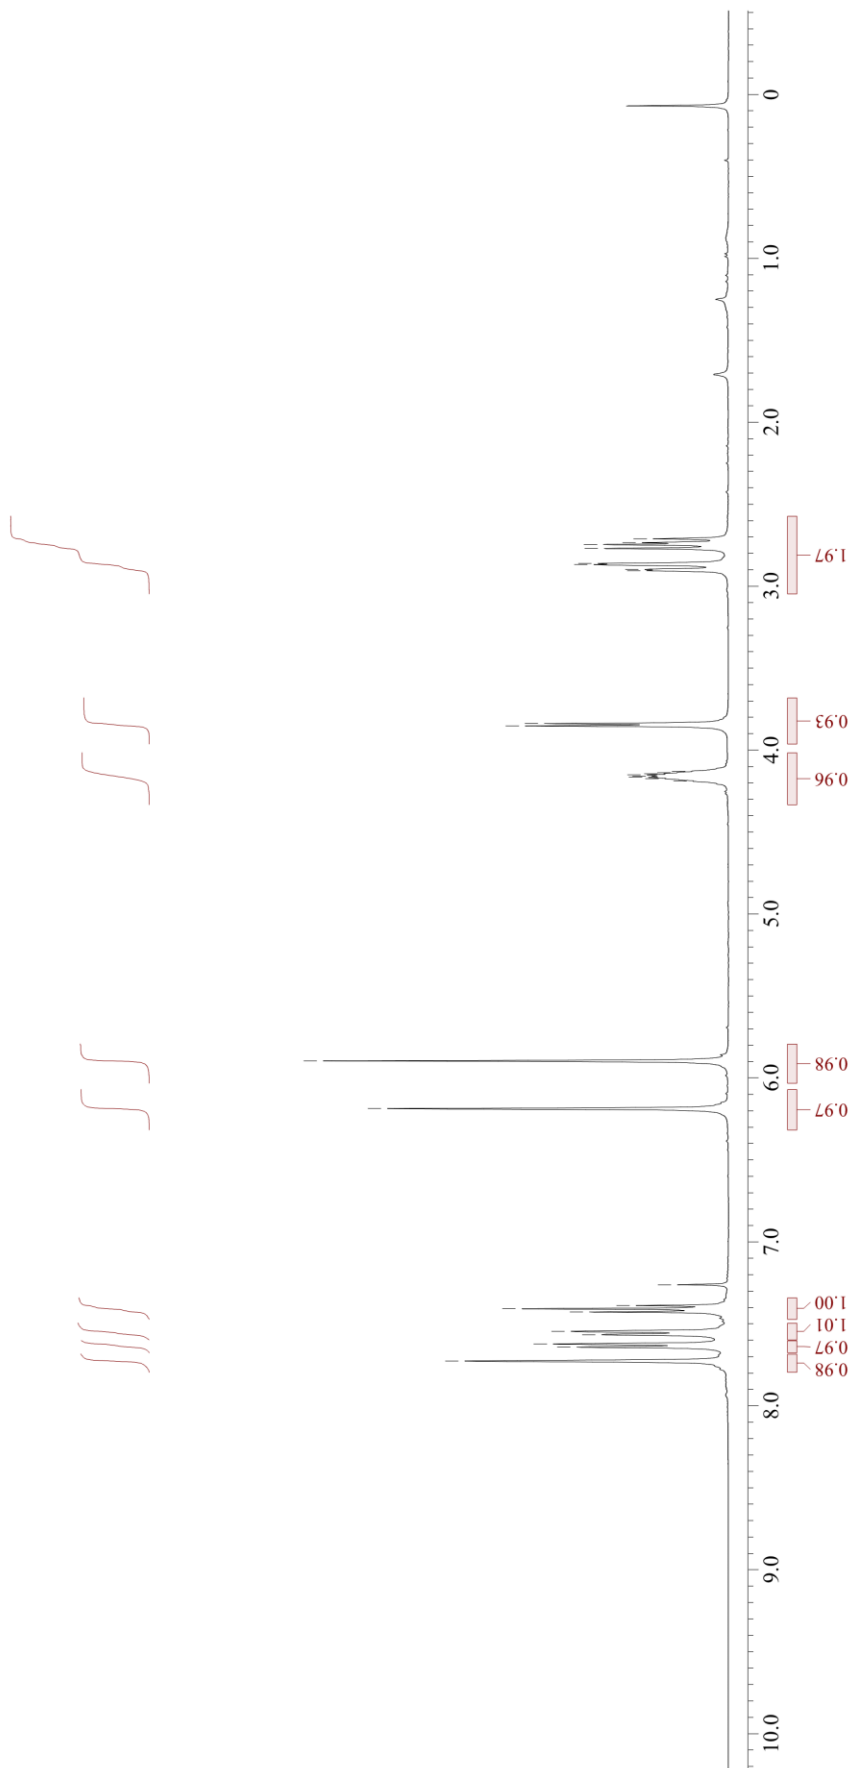

$^{13}\text{C}$  NMR of **9f** ( $\text{CDCl}_3$ , 100 MHz, 25 °C)

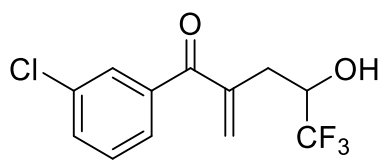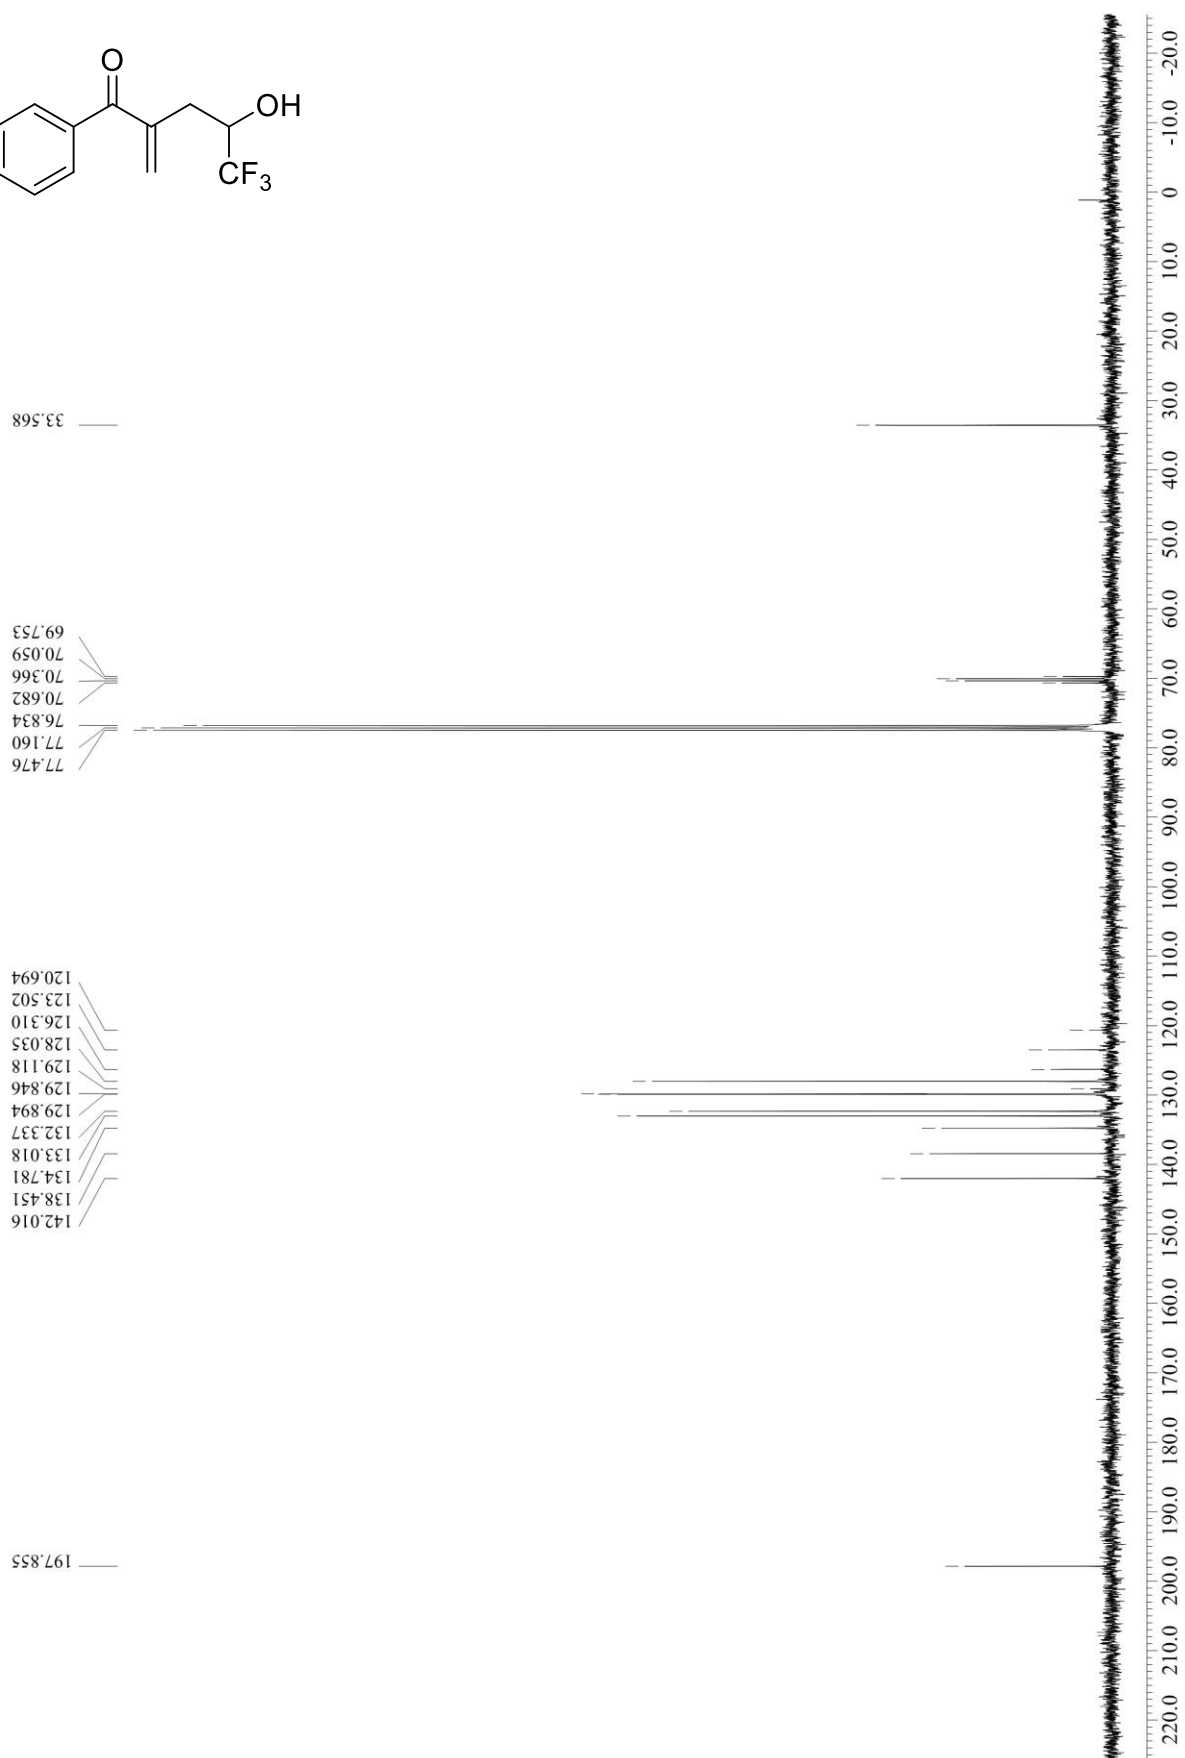

$^{19}\text{F}$  NMR of **9f** ( $\text{CDCl}_3$ , 375 MHz, 25 °C)

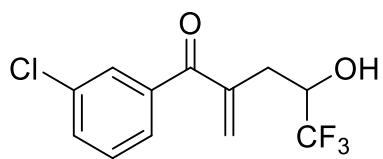

-79.354  
-79.370

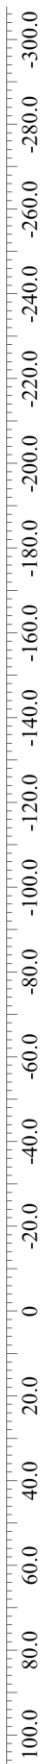

<sup>1</sup>H NMR of **9g** (CDCl<sub>3</sub>, 400 MHz, 25 °C)

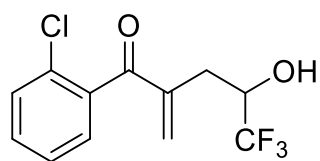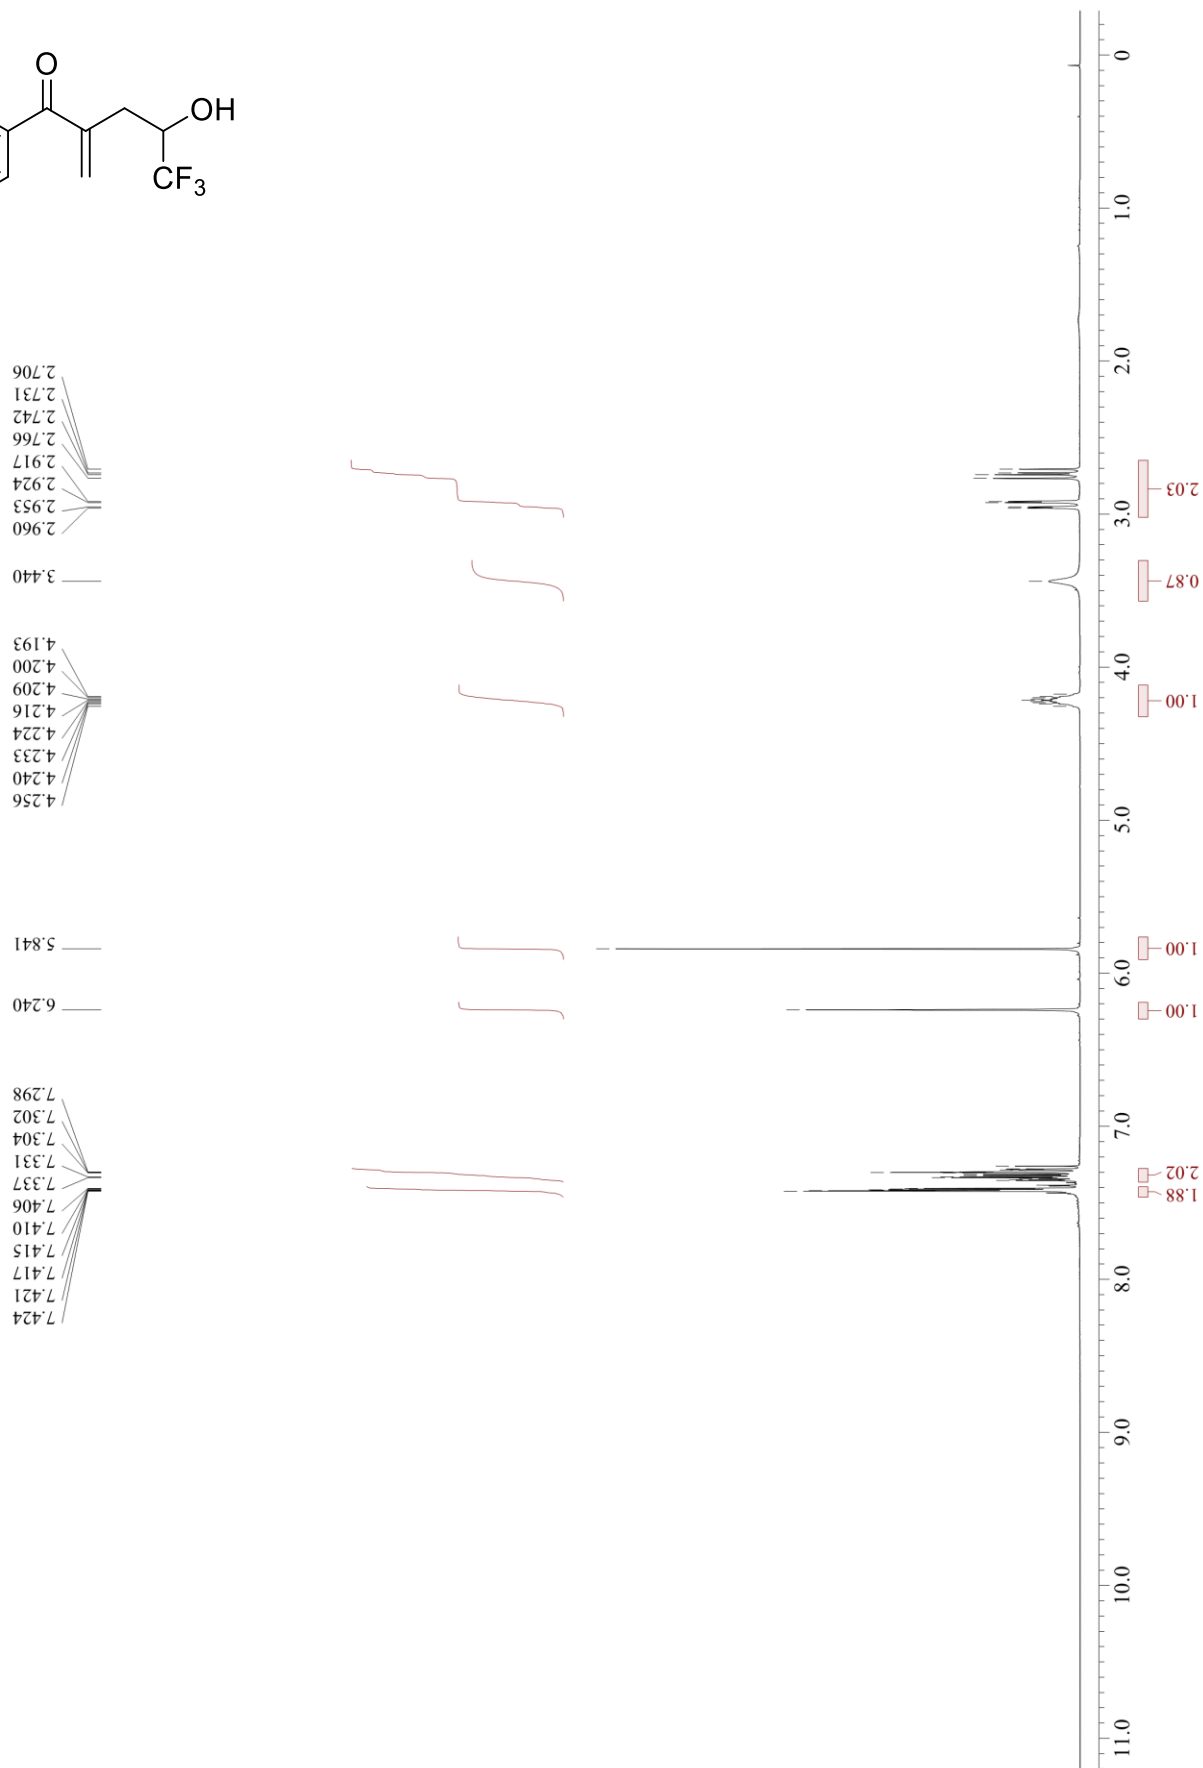

$^{13}\text{C}$  NMR of **9g** ( $\text{CDCl}_3$ , 100 MHz, 25 °C)

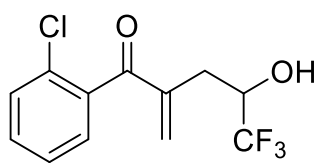

32.255

69.235  
69.542  
69.858  
70.165  
76.844  
77.160  
77.486

120.714  
123.521  
126.329  
126.731  
128.964  
129.127  
130.220  
131.149  
131.475  
135.413  
137.732  
143.089

198.439

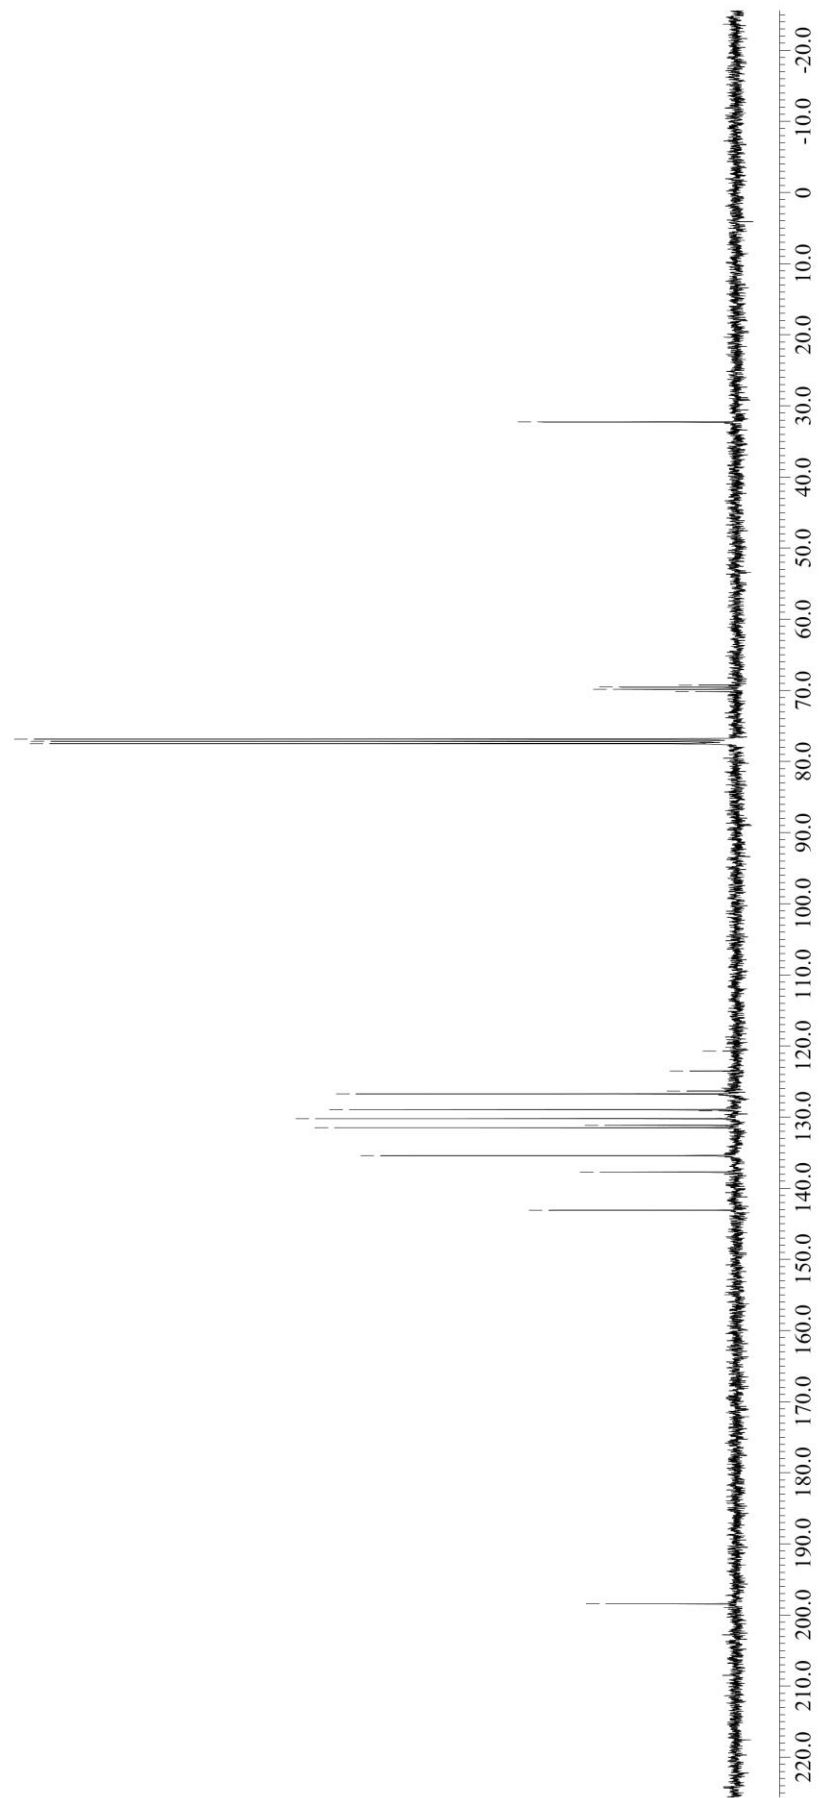

$^{19}\text{F}$  NMR of **9g** ( $\text{CDCl}_3$ , 375 MHz, 25 °C)

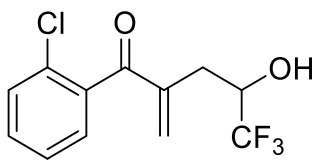

-79.386  
-79.401

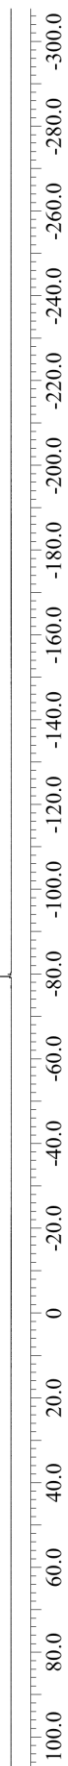

$^1\text{H}$  NMR of **9h** ( $\text{CDCl}_3$ , 400 MHz, 25 °C)

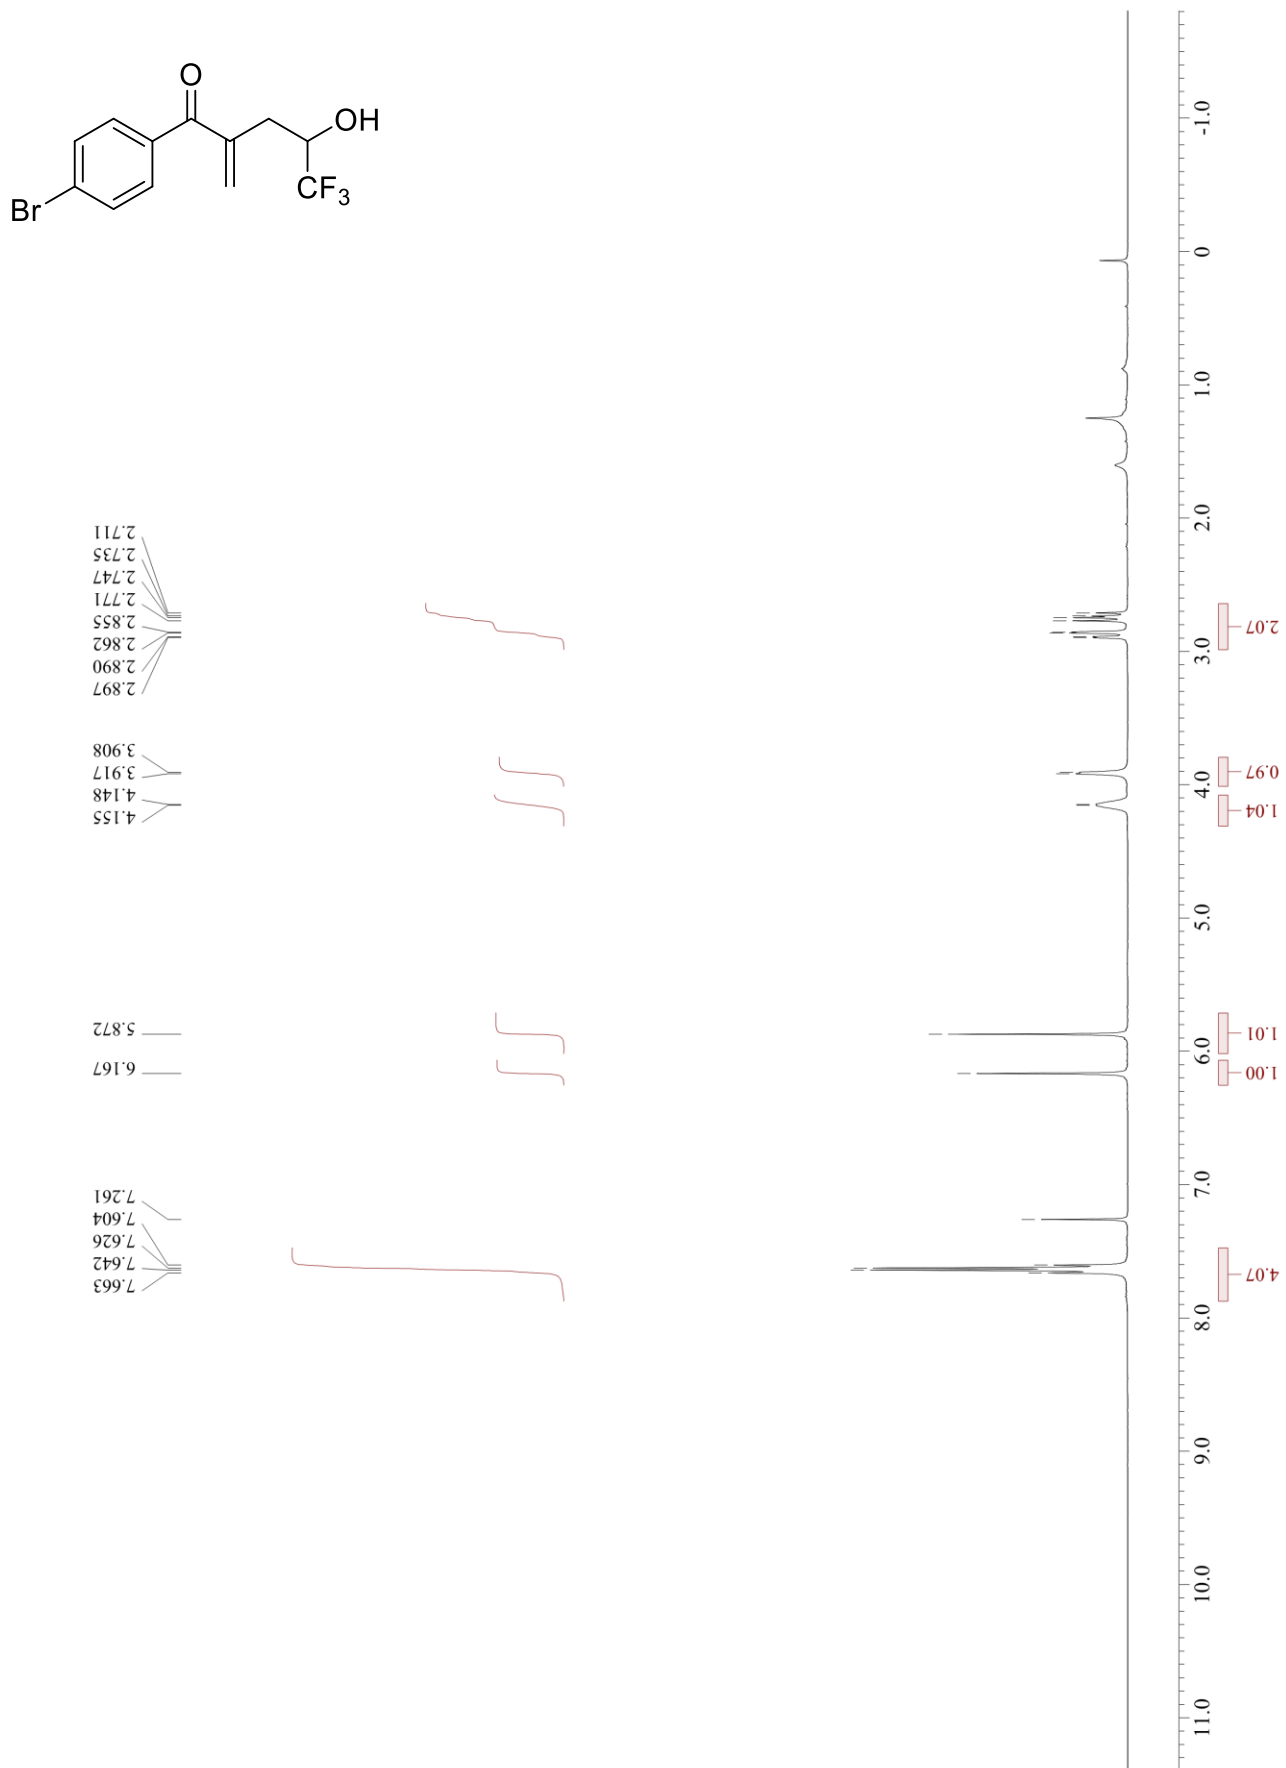

$^{13}\text{C}$  NMR of **9h** ( $\text{CDCl}_3$ , 100 MHz, 25  $^\circ\text{C}$ )

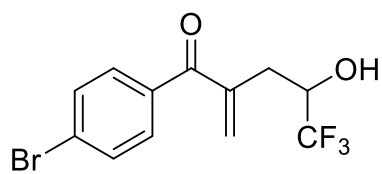

33.731

69.915  
70.222  
70.538  
70.835  
76.844  
77.160  
77.476

120.704  
123.512  
126.319  
128.380  
129.127  
131.513  
131.801  
131.916  
135.490  
142.102

198.257

220.0 210.0 200.0 190.0 180.0 170.0 160.0 150.0 140.0 130.0 120.0 110.0 100.0 90.0 80.0 70.0 60.0 50.0 40.0 30.0 20.0 10.0 0 -10.0 -20.0



$^{19}\text{F}$  NMR of **9h** ( $\text{CDCl}_3$ , 375 MHz, 25  $^\circ\text{C}$ )

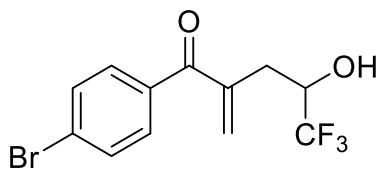

-79.354  
-79.370

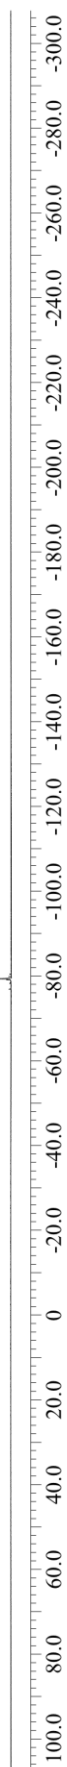

$^1\text{H}$  NMR of **9i** ( $\text{CDCl}_3$ , 400 MHz, 25 °C)

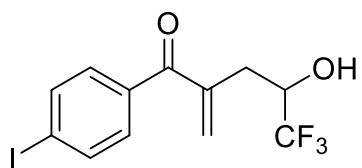

2.702  
2.726  
2.738  
2.761  
2.849  
2.856  
2.885  
2.892

3.940  
3.952  
4.142

5.861  
6.156

7.261  
7.471  
7.492  
7.821  
7.841

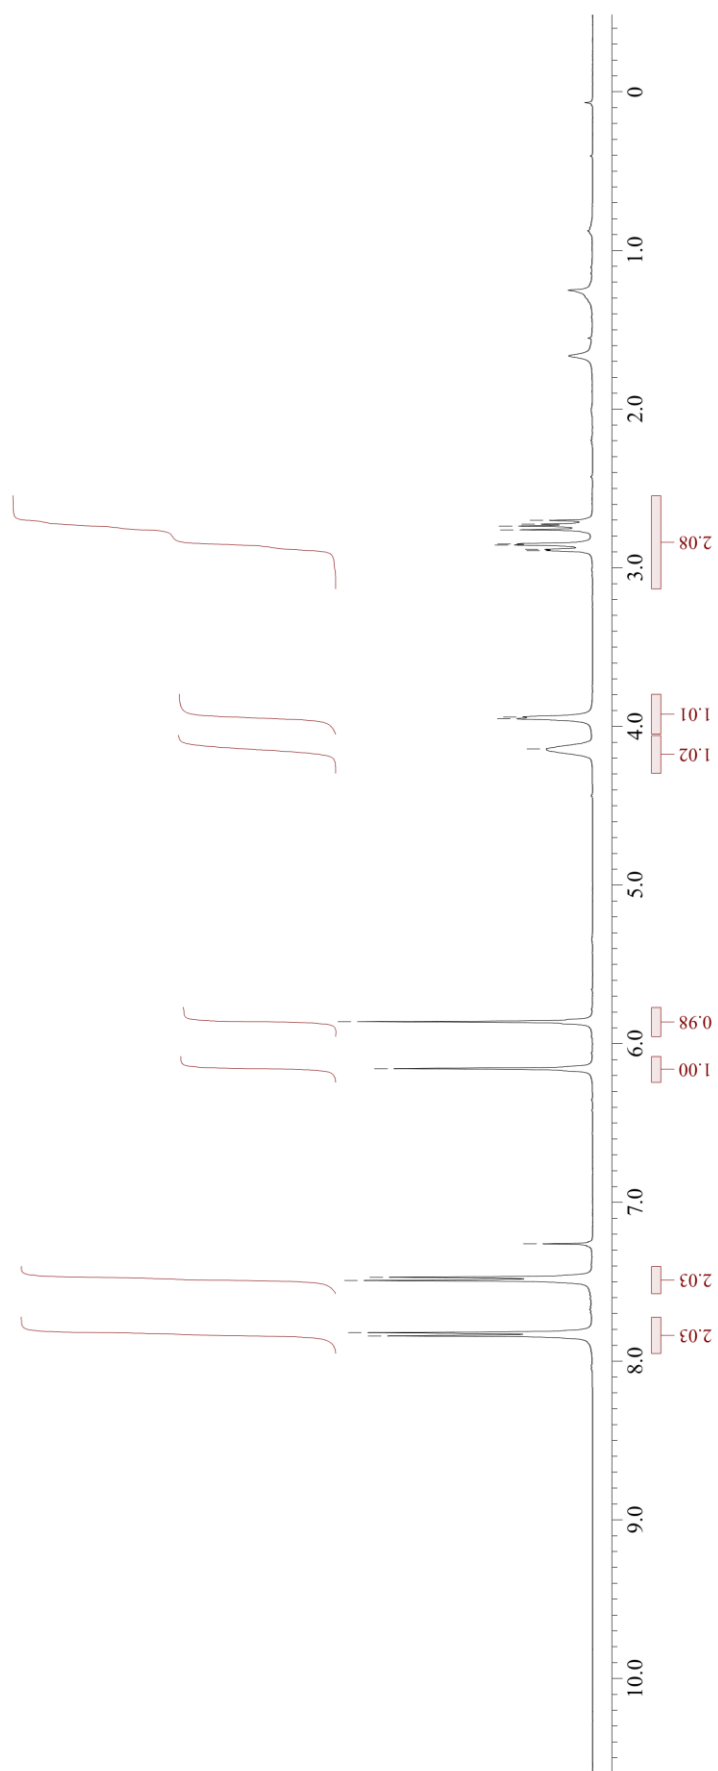

$^{13}\text{C}$  NMR of **9i** ( $\text{CDCl}_3$ , 100 MHz, 25 °C)

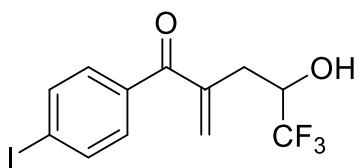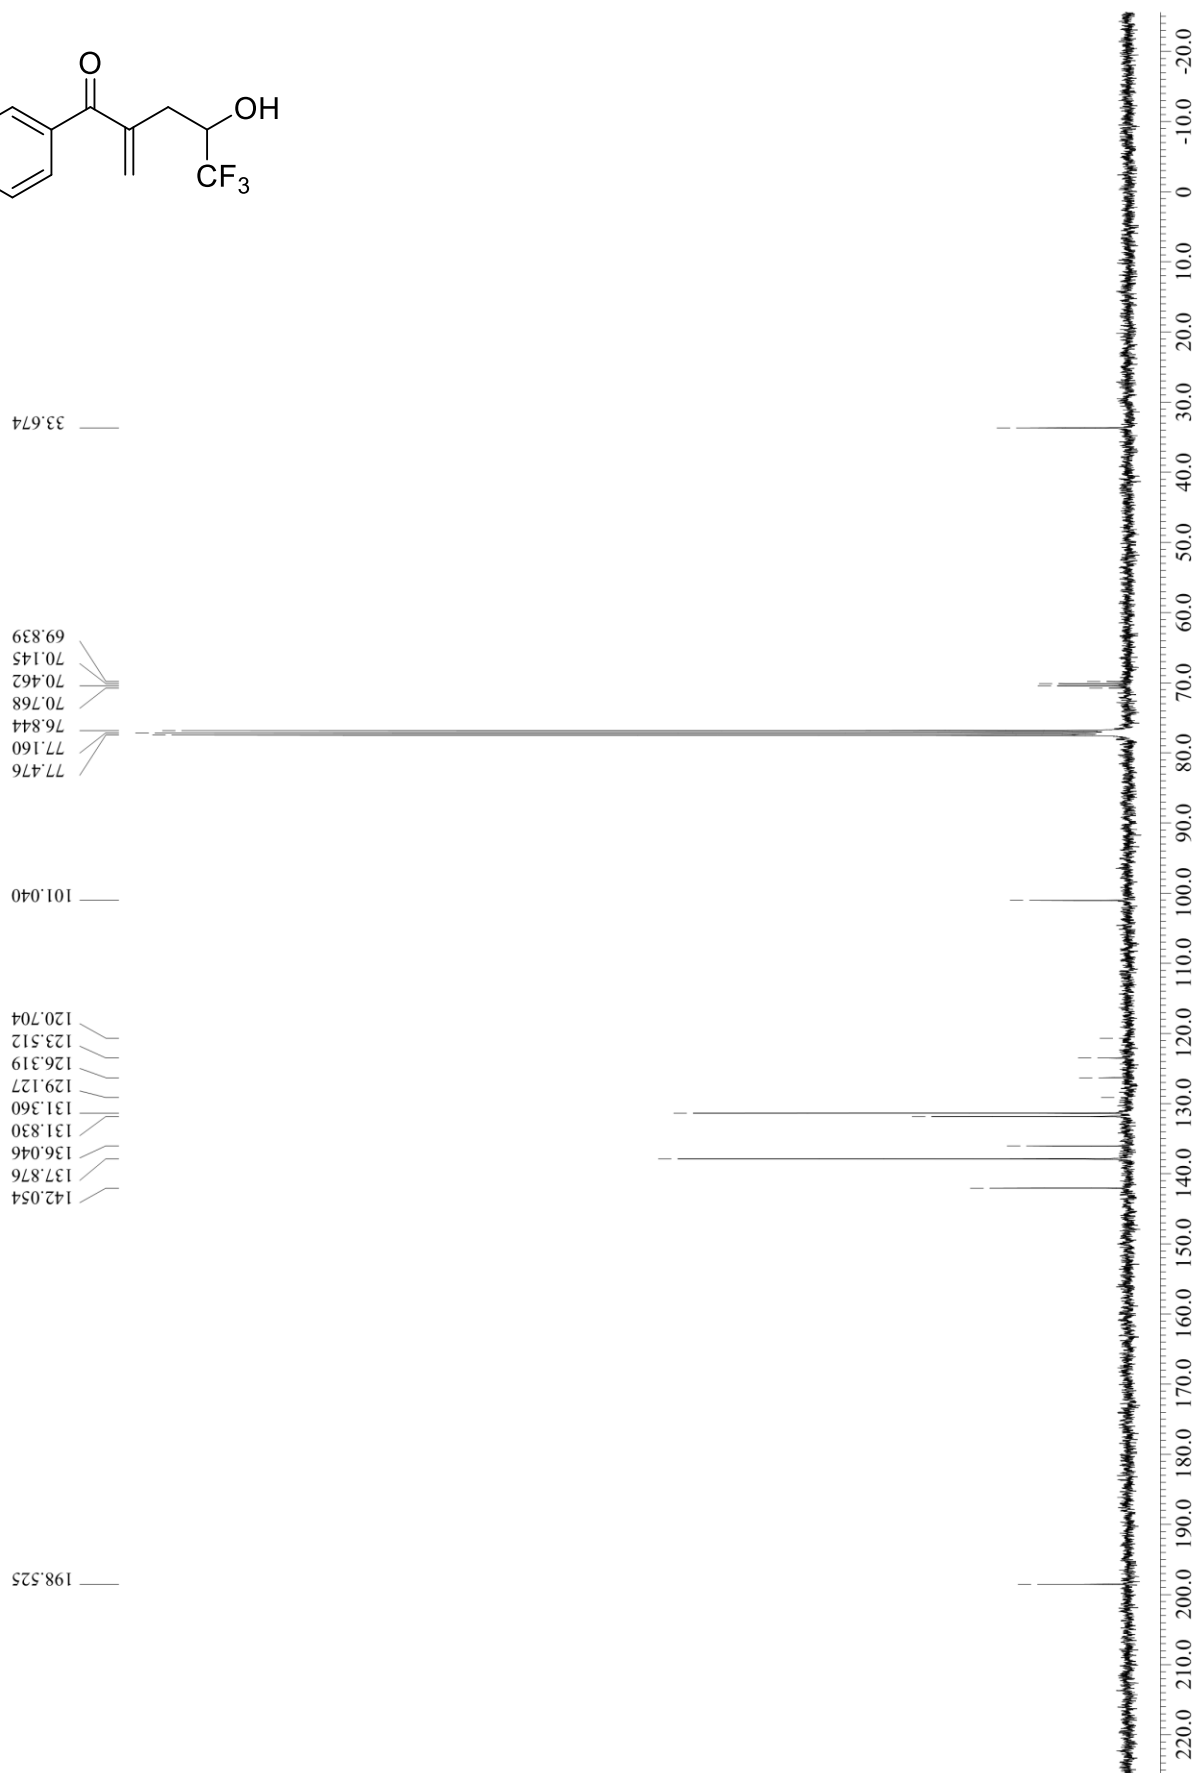

$^{19}\text{F}$  NMR of **9i** ( $\text{CDCl}_3$ , 375 MHz, 25 °C)

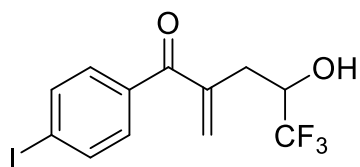

-79.354  
-79.338

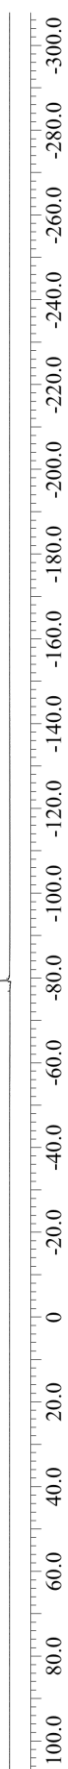

$^1\text{H}$  NMR of **9j** ( $\text{CDCl}_3$ , 400 MHz, 25 °C)

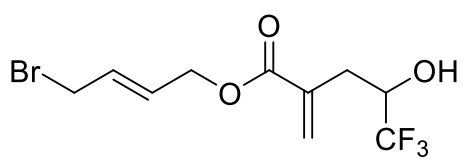

2.585  
2.609  
2.621  
2.644  
2.761  
2.768  
2.798  
2.804  
3.276  
4.070  
4.083  
4.123  
4.140  
4.147  
4.709  
4.720  
5.848  
5.918  
5.928  
5.931  
5.938  
5.951  
6.386  
7.261

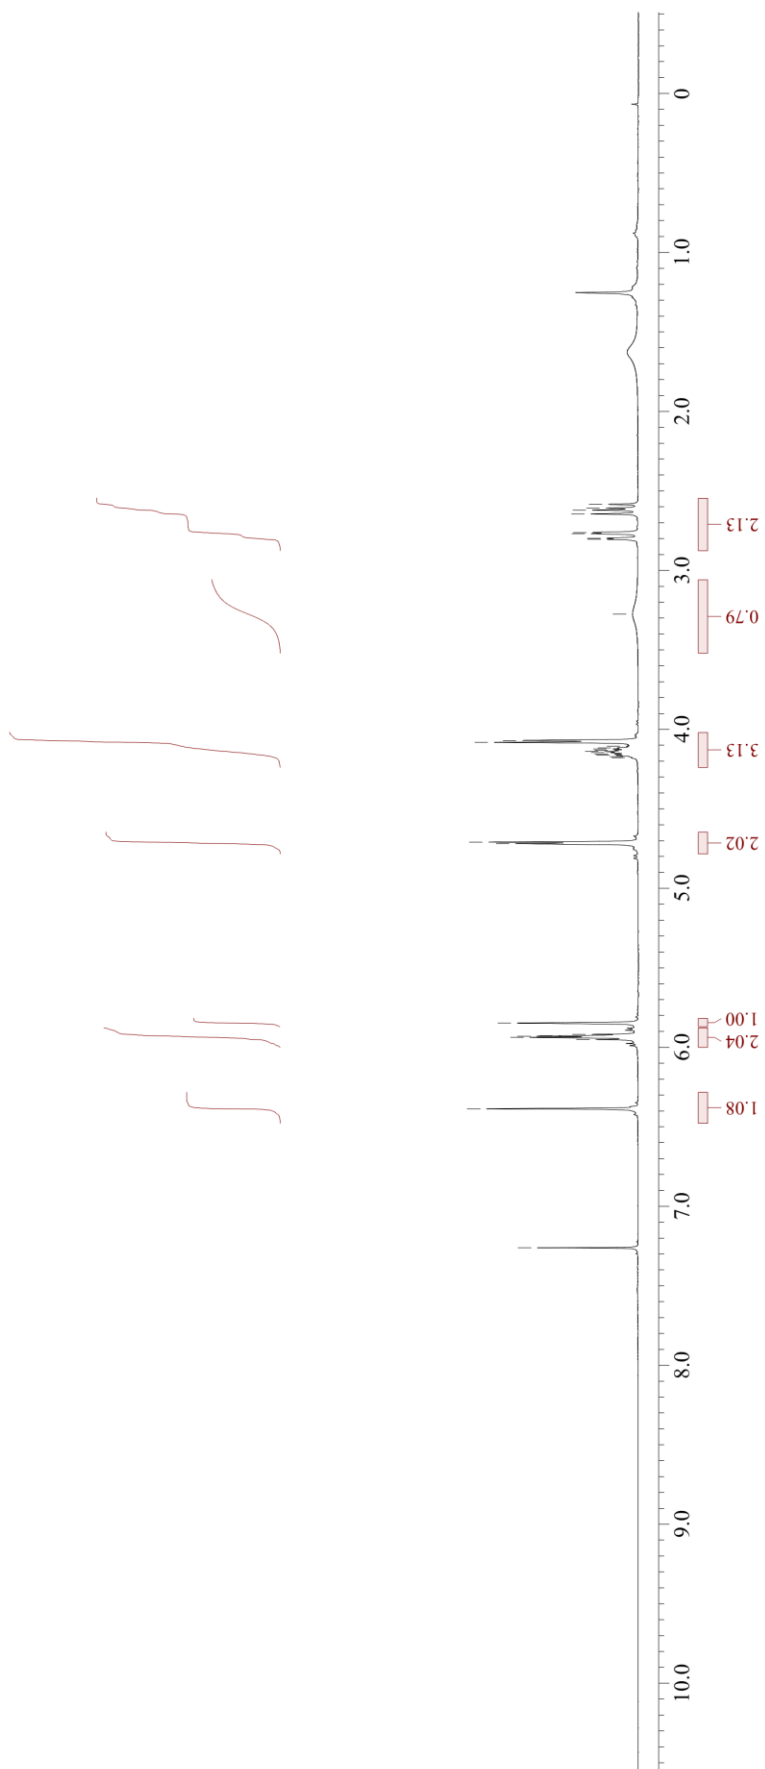

$^{13}\text{C}$  NMR of **9j** ( $\text{CDCl}_3$ , 100 MHz, 25 °C)

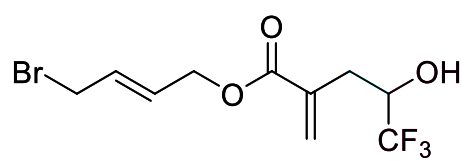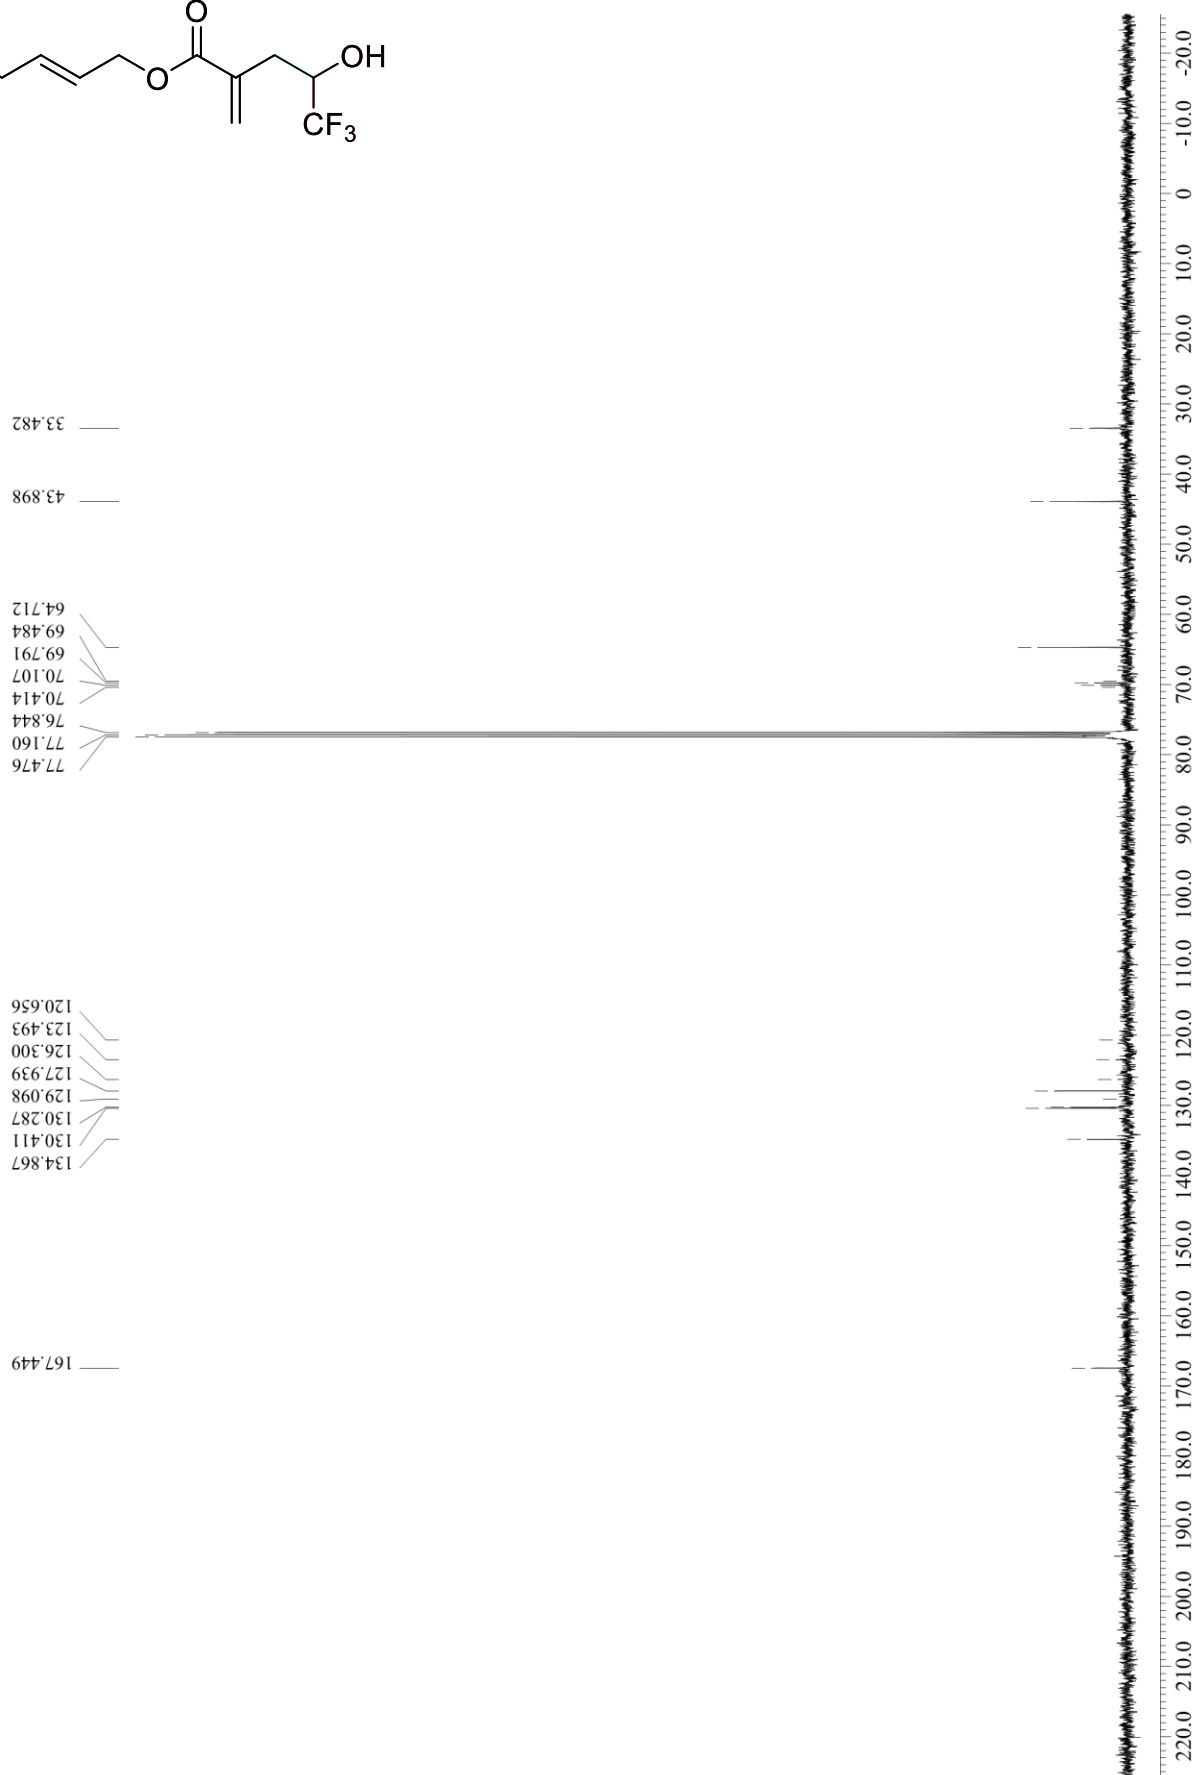

$^{19}\text{F}$  NMR of **9j** ( $\text{CDCl}_3$ , 375 MHz, 25 °C)

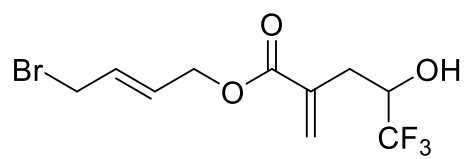

-79.584  
-79.560

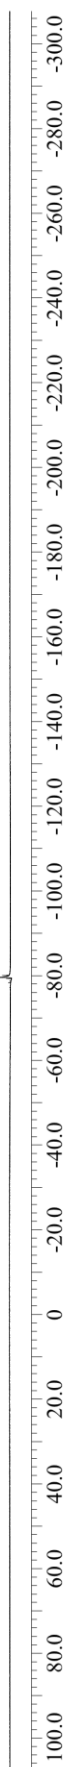

$^1\text{H}$  NMR of **9k** ( $\text{CDCl}_3$ , 400 MHz, 25 °C)

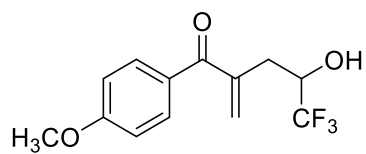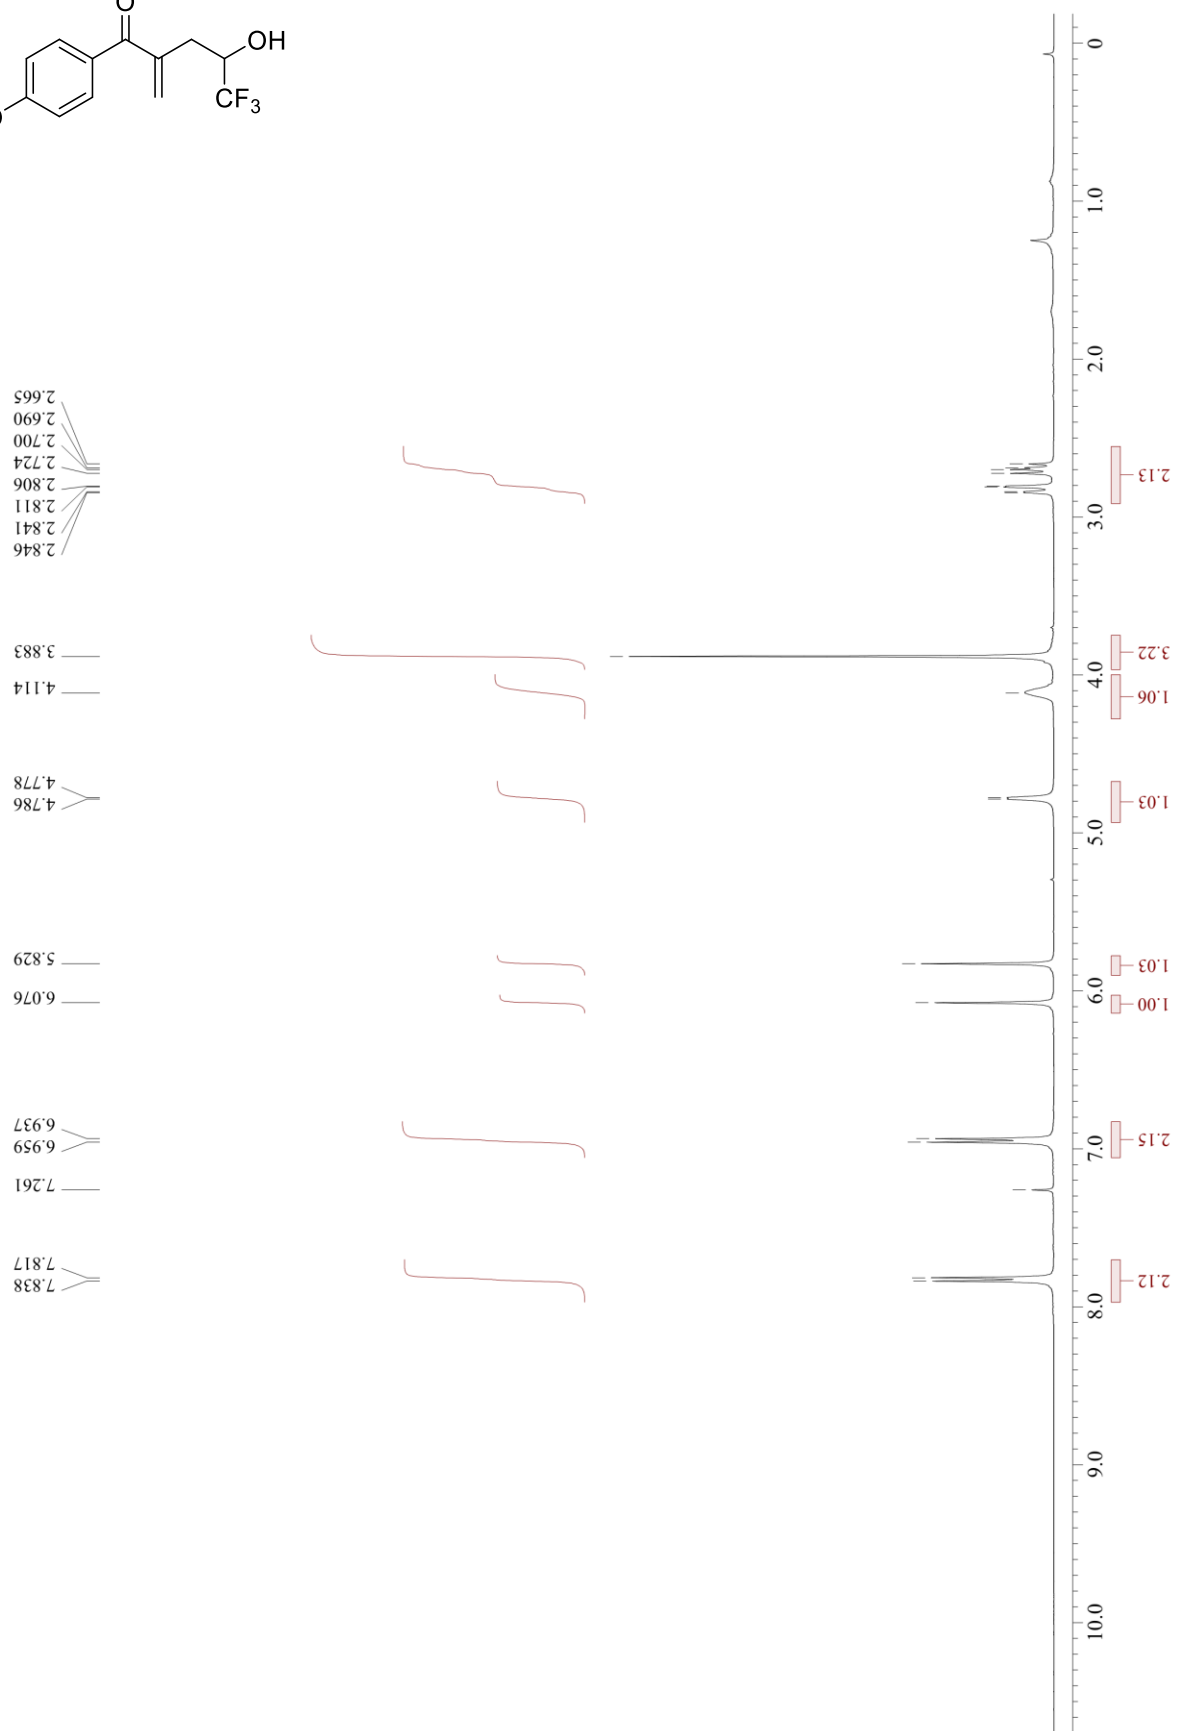



$^{13}\text{C}$  NMR of **9k** ( $\text{CDCl}_3$ , 100 MHz, 25 °C)

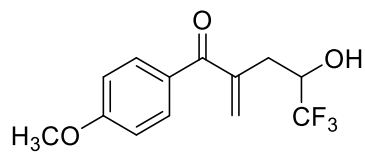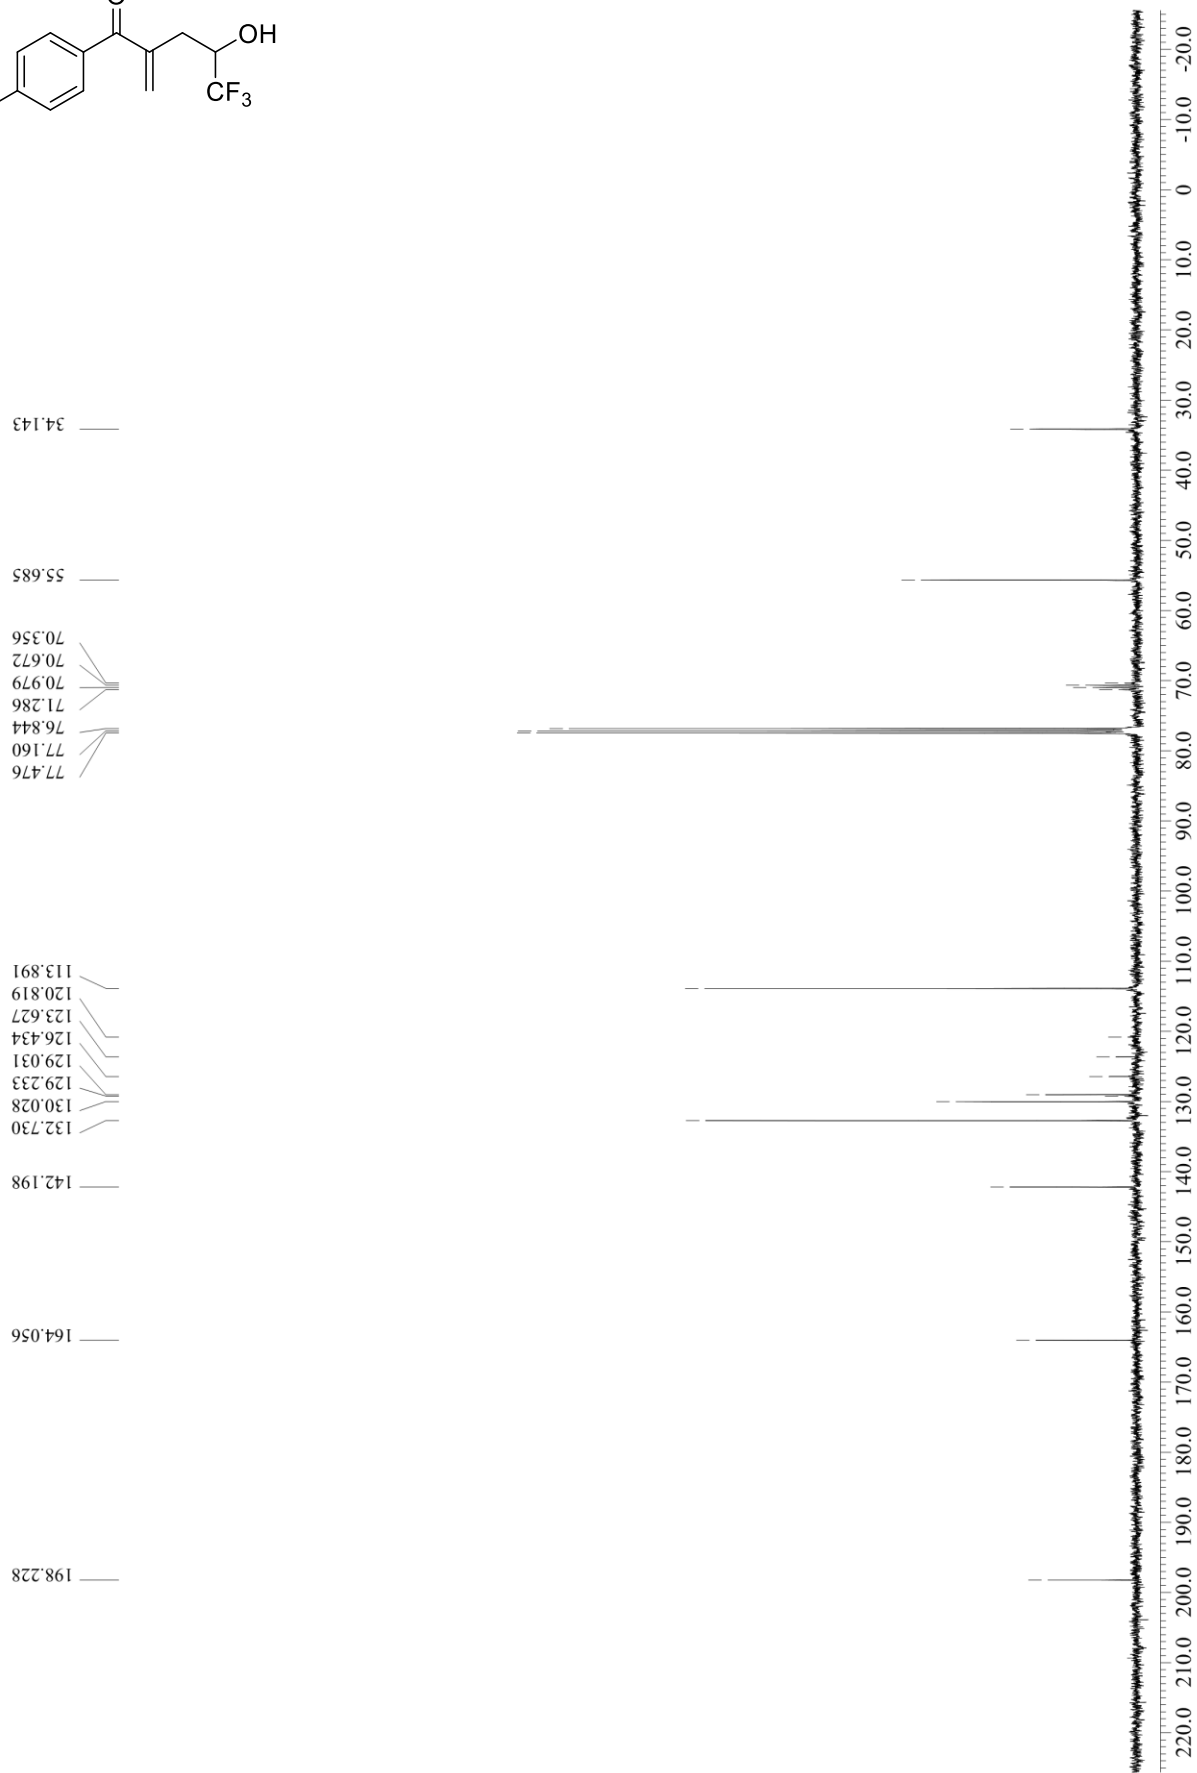

$^{19}\text{F}$  NMR of **9k** ( $\text{CDCl}_3$ , 375 MHz, 25 °C)

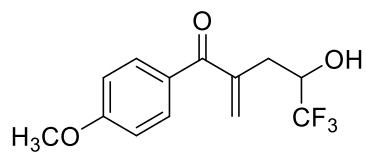

-79.362  
-79.346

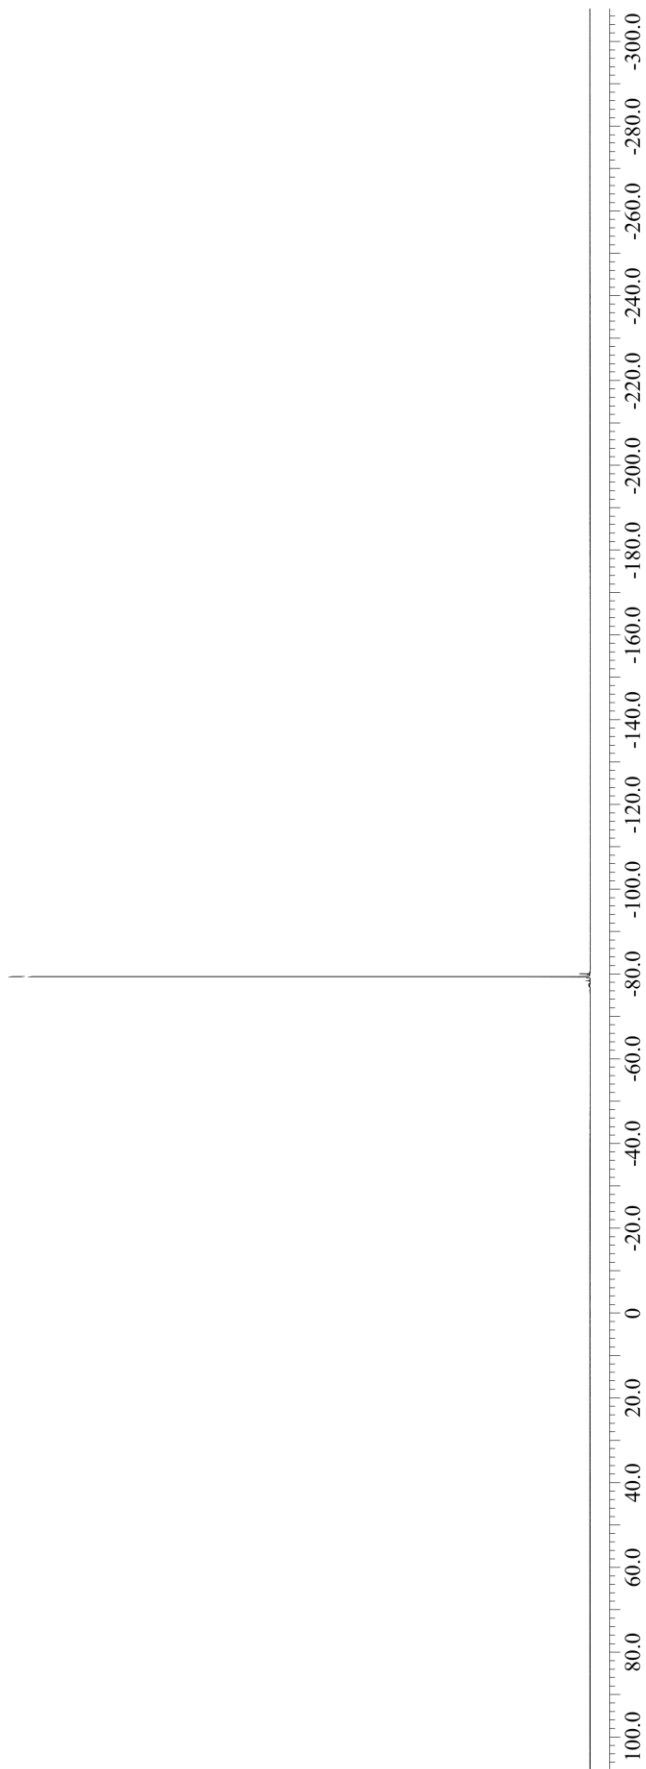

$^1\text{H}$  NMR of **91** ( $\text{CDCl}_3$ , 400 MHz, 25  $^\circ\text{C}$ )

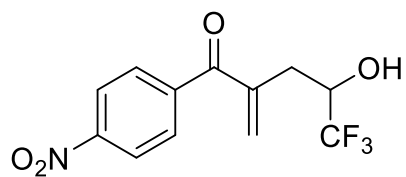

2.758  
2.781  
2.794  
2.817  
2.919  
2.927  
2.955  
2.963  
3.366

4.204  
4.211

5.885

6.268

7.261

7.877

7.882

7.894

7.899

7.905

8.296

8.302

8.306

8.318

8.324

8.329

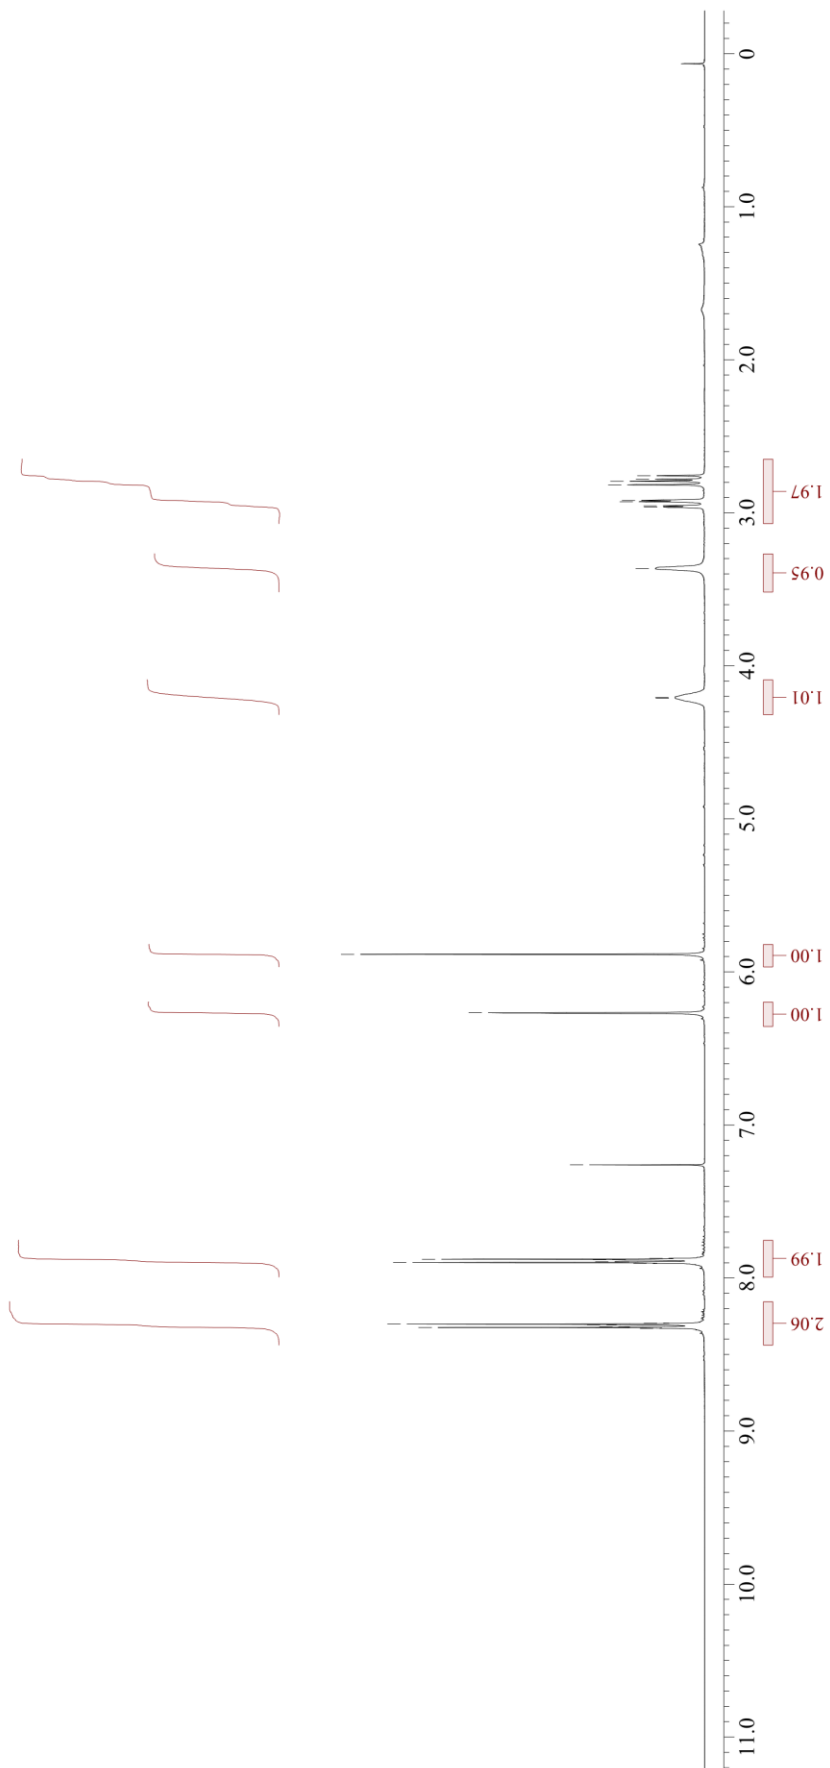

$^{13}\text{C}$  NMR of **91** ( $\text{CDCl}_3$ , 100 MHz, 25 °C)

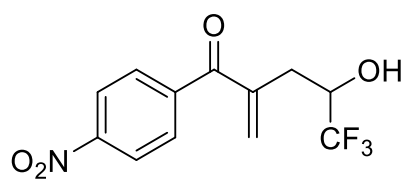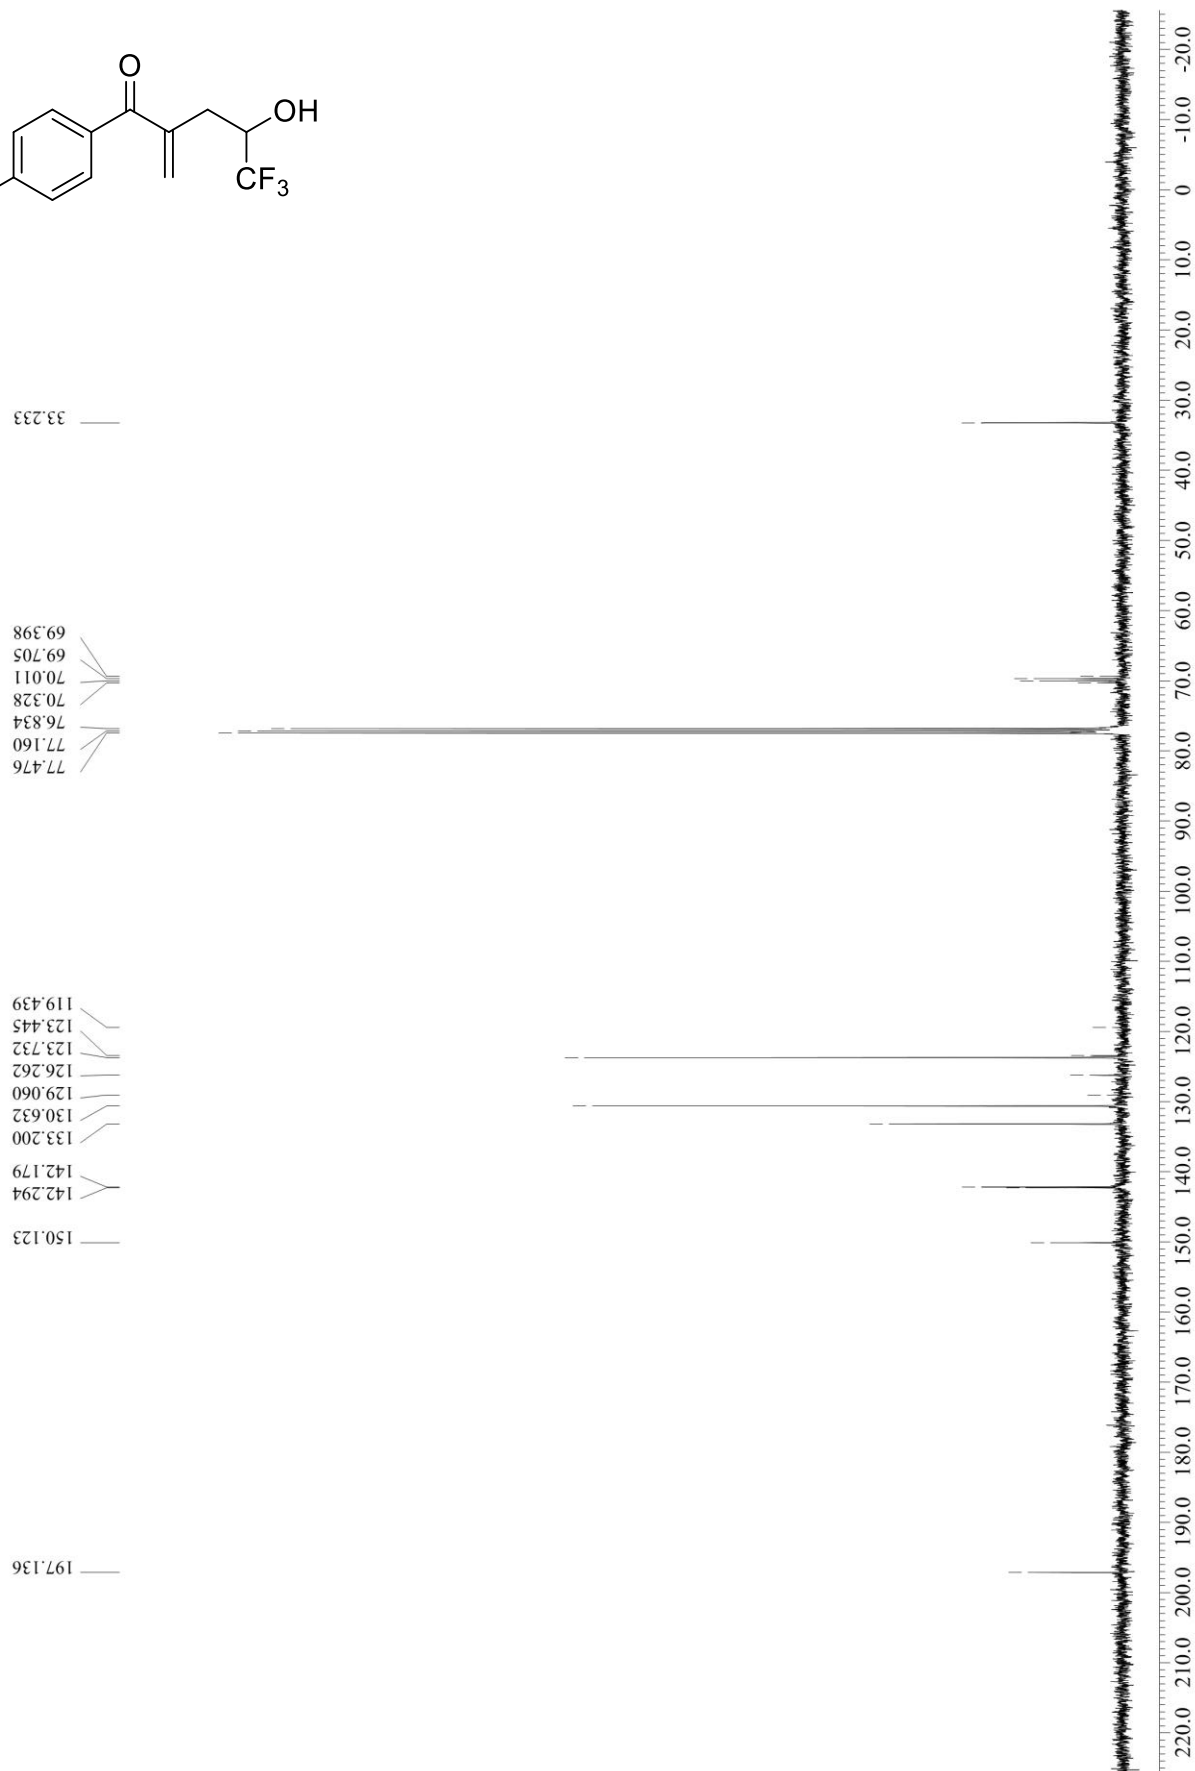

$^{19}\text{F}$  NMR of **91** ( $\text{CDCl}_3$ , 375 MHz, 25 °C)

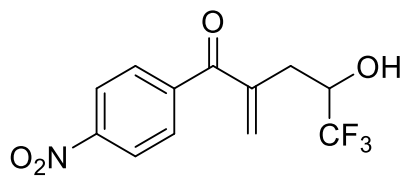

-79.346  
-79.362

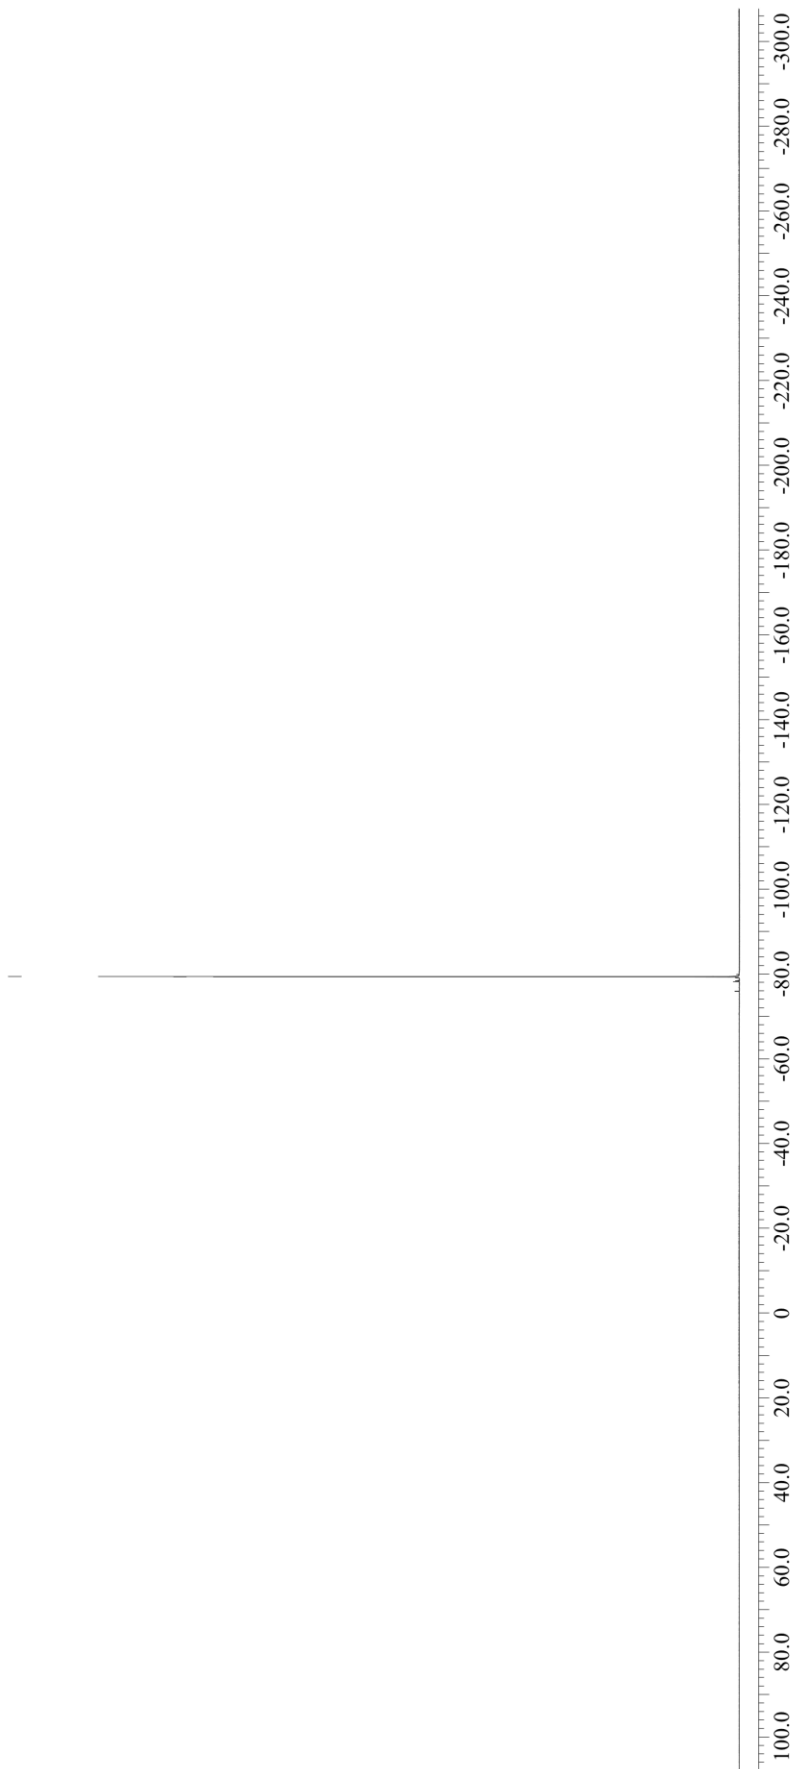

<sup>1</sup>H NMR of **9m** (CDCl<sub>3</sub>, 400 MHz, 25 °C)

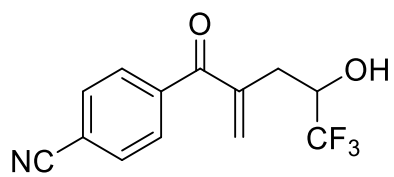

2.739  
2.741  
2.763  
2.776  
2.800  
2.902  
2.911  
2.938  
2.946  
3.418  
4.166  
4.174  
4.182  
4.190  
4.198  
4.206  
4.214  
4.230  
5.863  
6.238  
7.261  
7.755  
7.776  
7.820  
7.841

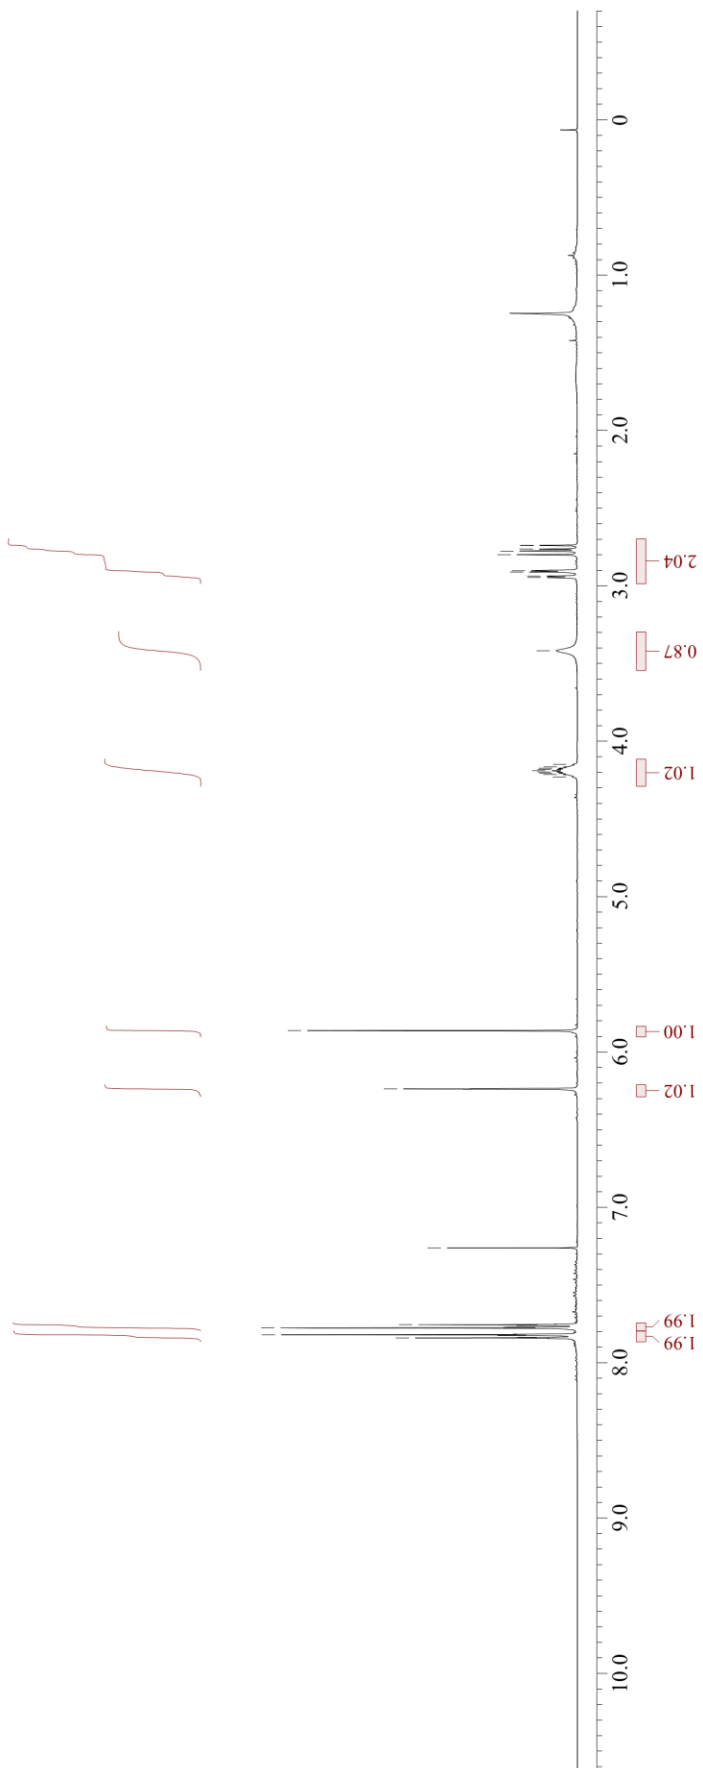

$^{13}\text{C}$  NMR of **9m** ( $\text{CDCl}_3$ , 100 MHz, 25 °C)

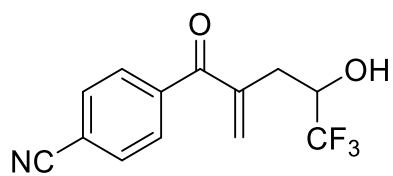

33.290

69.417  
69.724  
70.030  
70.347  
76.844  
77.160  
77.476

116.143  
117.954  
120.838  
123.454  
126.272  
129.233  
130.153  
132.366  
132.903  
140.646  
142.045

197.366

220.0 210.0 200.0 190.0 180.0 170.0 160.0 150.0 140.0 130.0 120.0 110.0 100.0 90.0 80.0 70.0 60.0 50.0 40.0 30.0 20.0 10.0 0 -10.0 -20.0

$^{19}\text{F}$  NMR of **9m** ( $\text{CDCl}_3$ , 375 MHz, 25 °C)

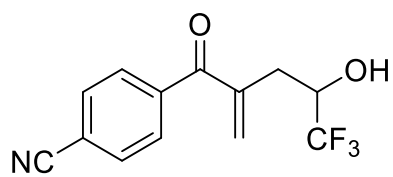

-79.346  
-79.330

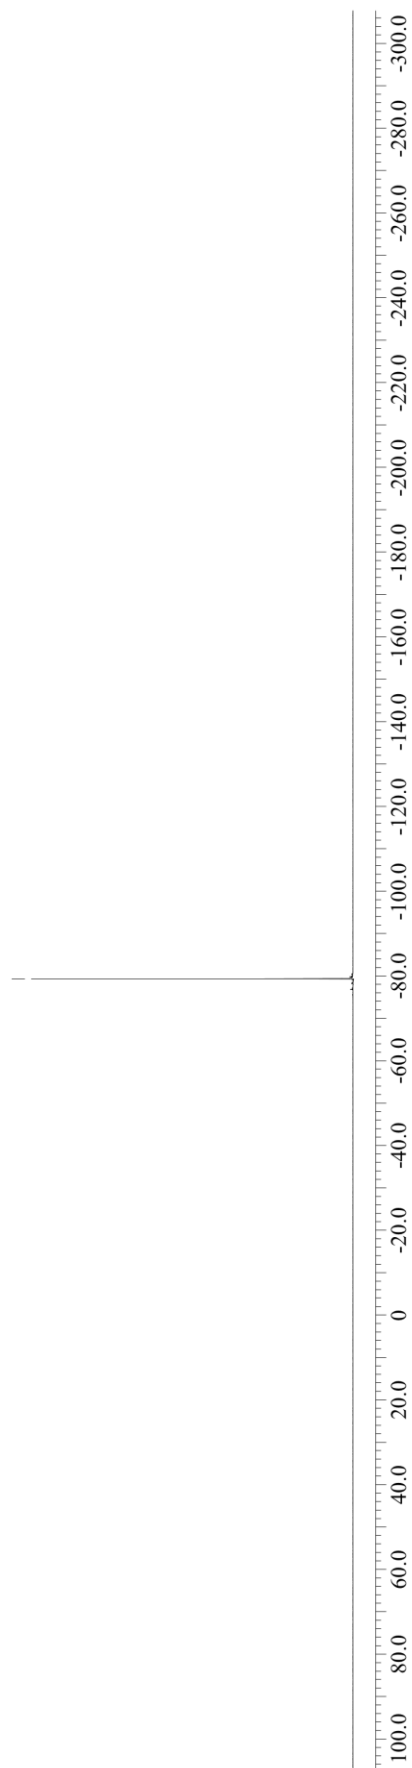



$^1\text{H}$  NMR of **9n** ( $\text{CDCl}_3$ , 400 MHz, 25 °C)

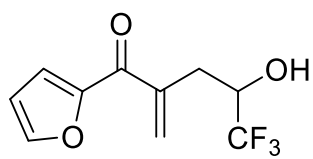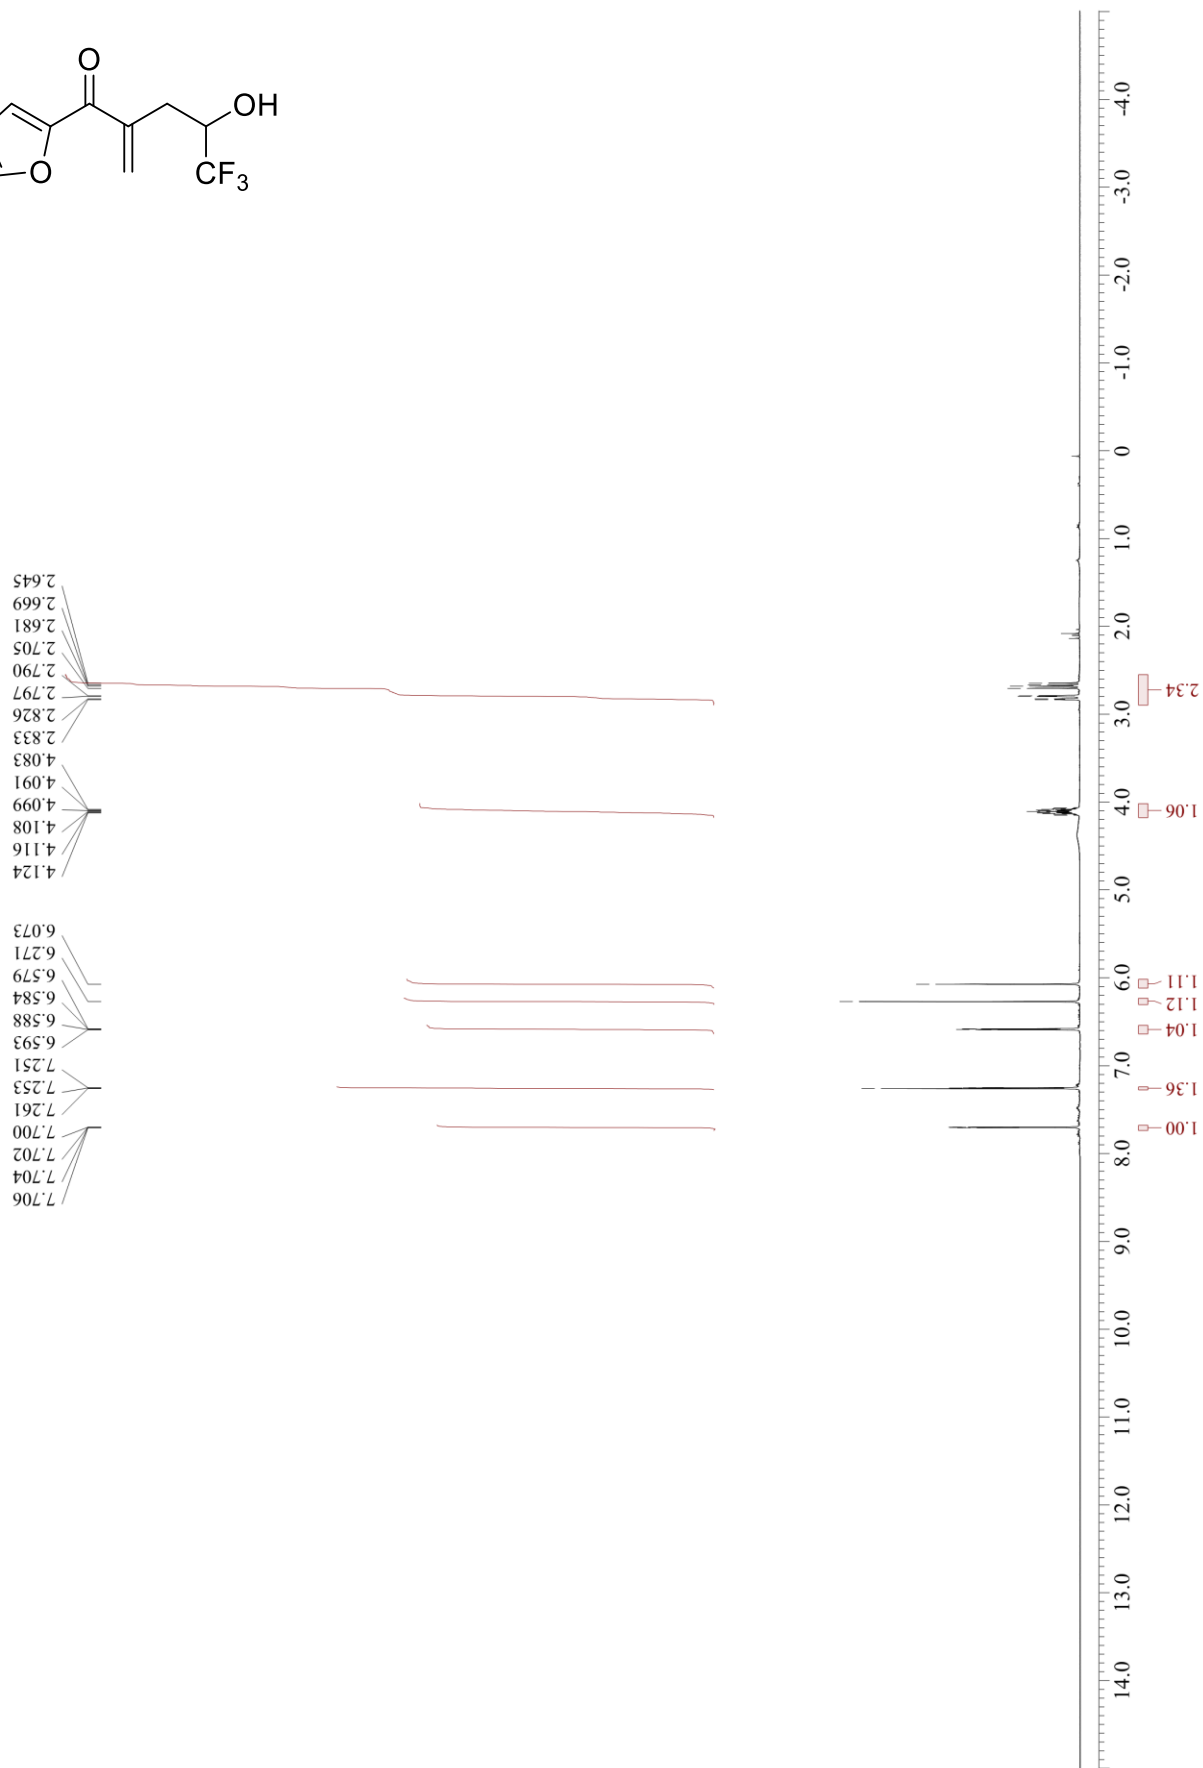

$^{13}\text{C}$  NMR of **9n** ( $\text{CDCl}_3$ , 100 MHz, 25 °C)

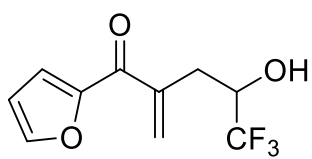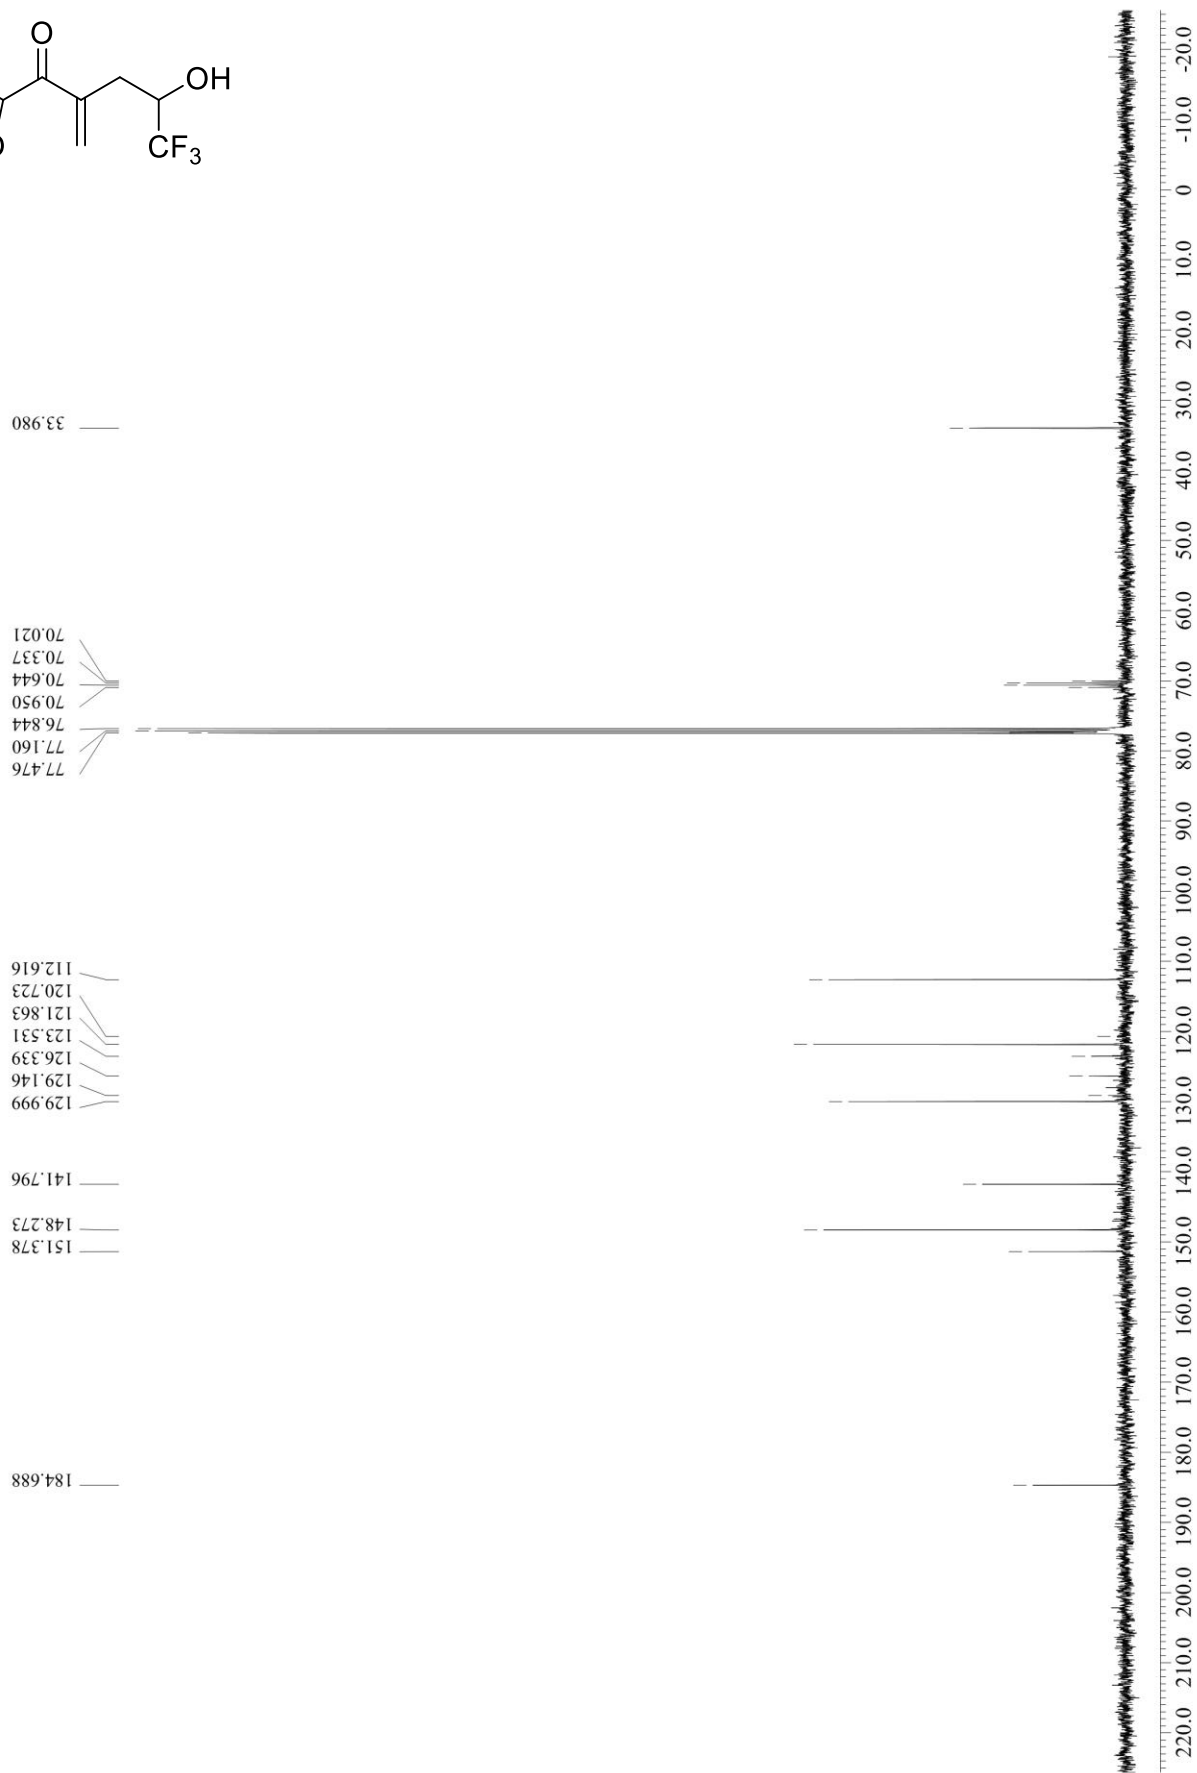

$^{19}\text{F}$  NMR of **9n** ( $\text{CDCl}_3$ , 375 MHz, 25 °C)

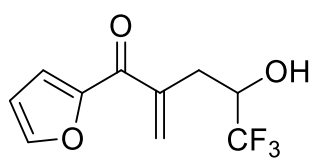

-79.338  
-79.354

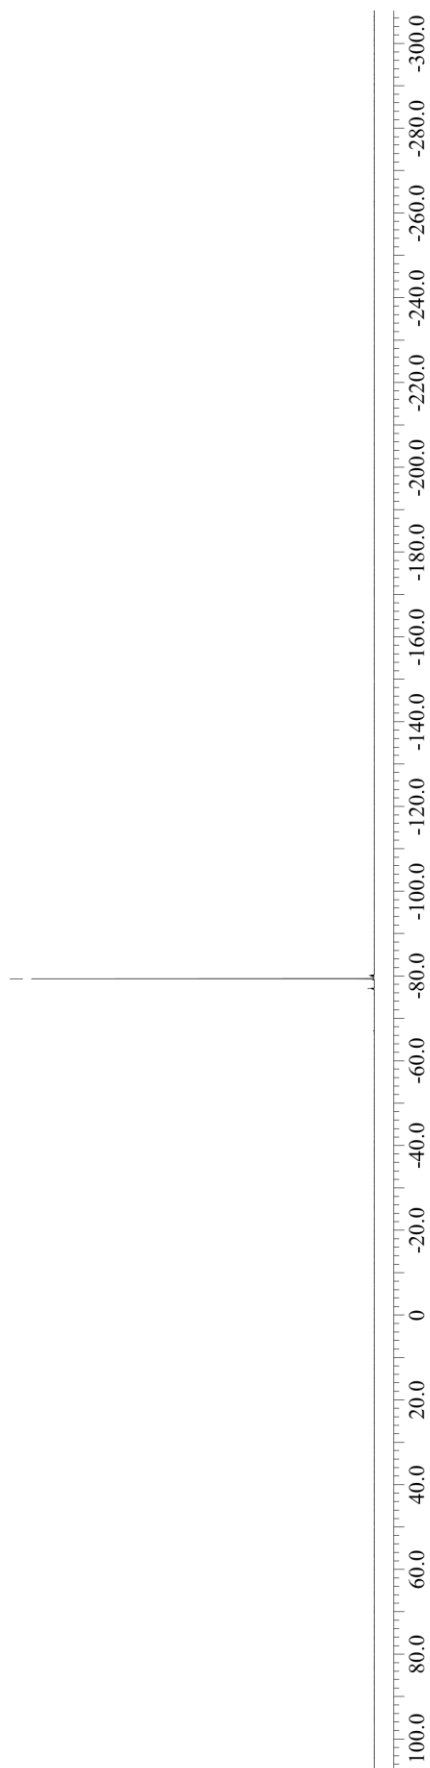

$^1\text{H}$  NMR of **9o** ( $\text{CDCl}_3$ , 400 MHz, 25 °C)

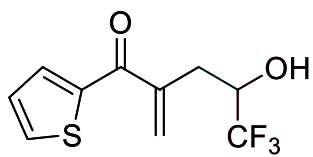

2.659  
2.683  
2.695  
2.719  
2.809  
2.817  
2.845  
2.852

4.111  
4.126  
4.142  
4.456

6.054  
6.105

7.159  
7.168  
7.172  
7.181  
7.261  
7.274  
7.727  
7.734  
7.737  
7.756  
7.759  
7.768  
7.771

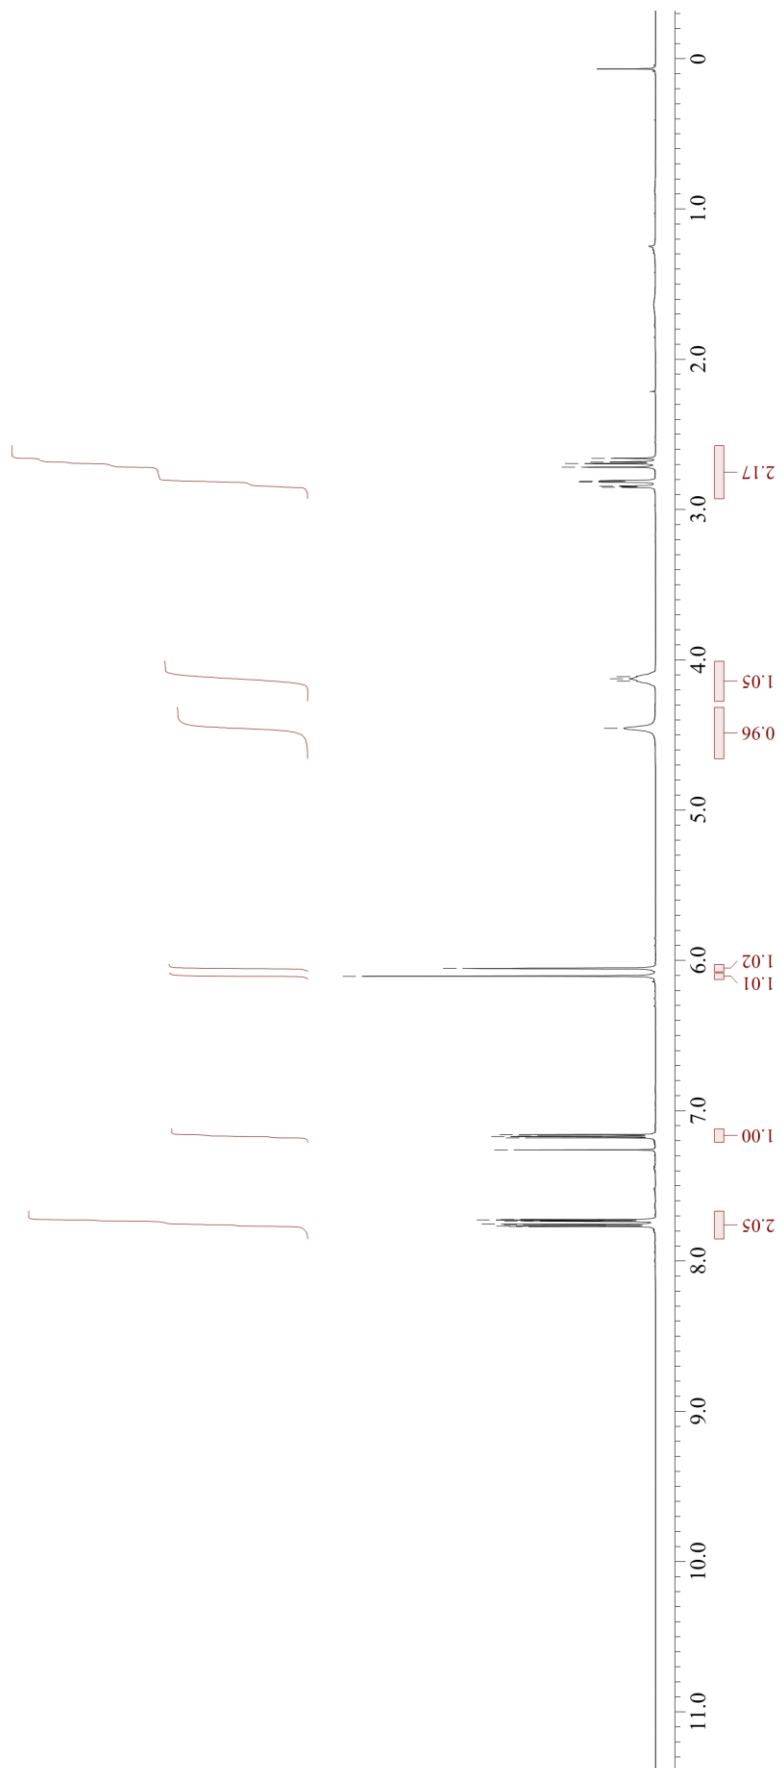

$^{13}\text{C}$  NMR of **9o** ( $\text{CDCl}_3$ , 100 MHz, 25 °C)

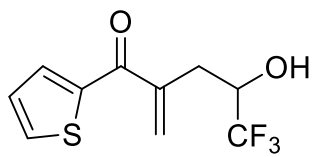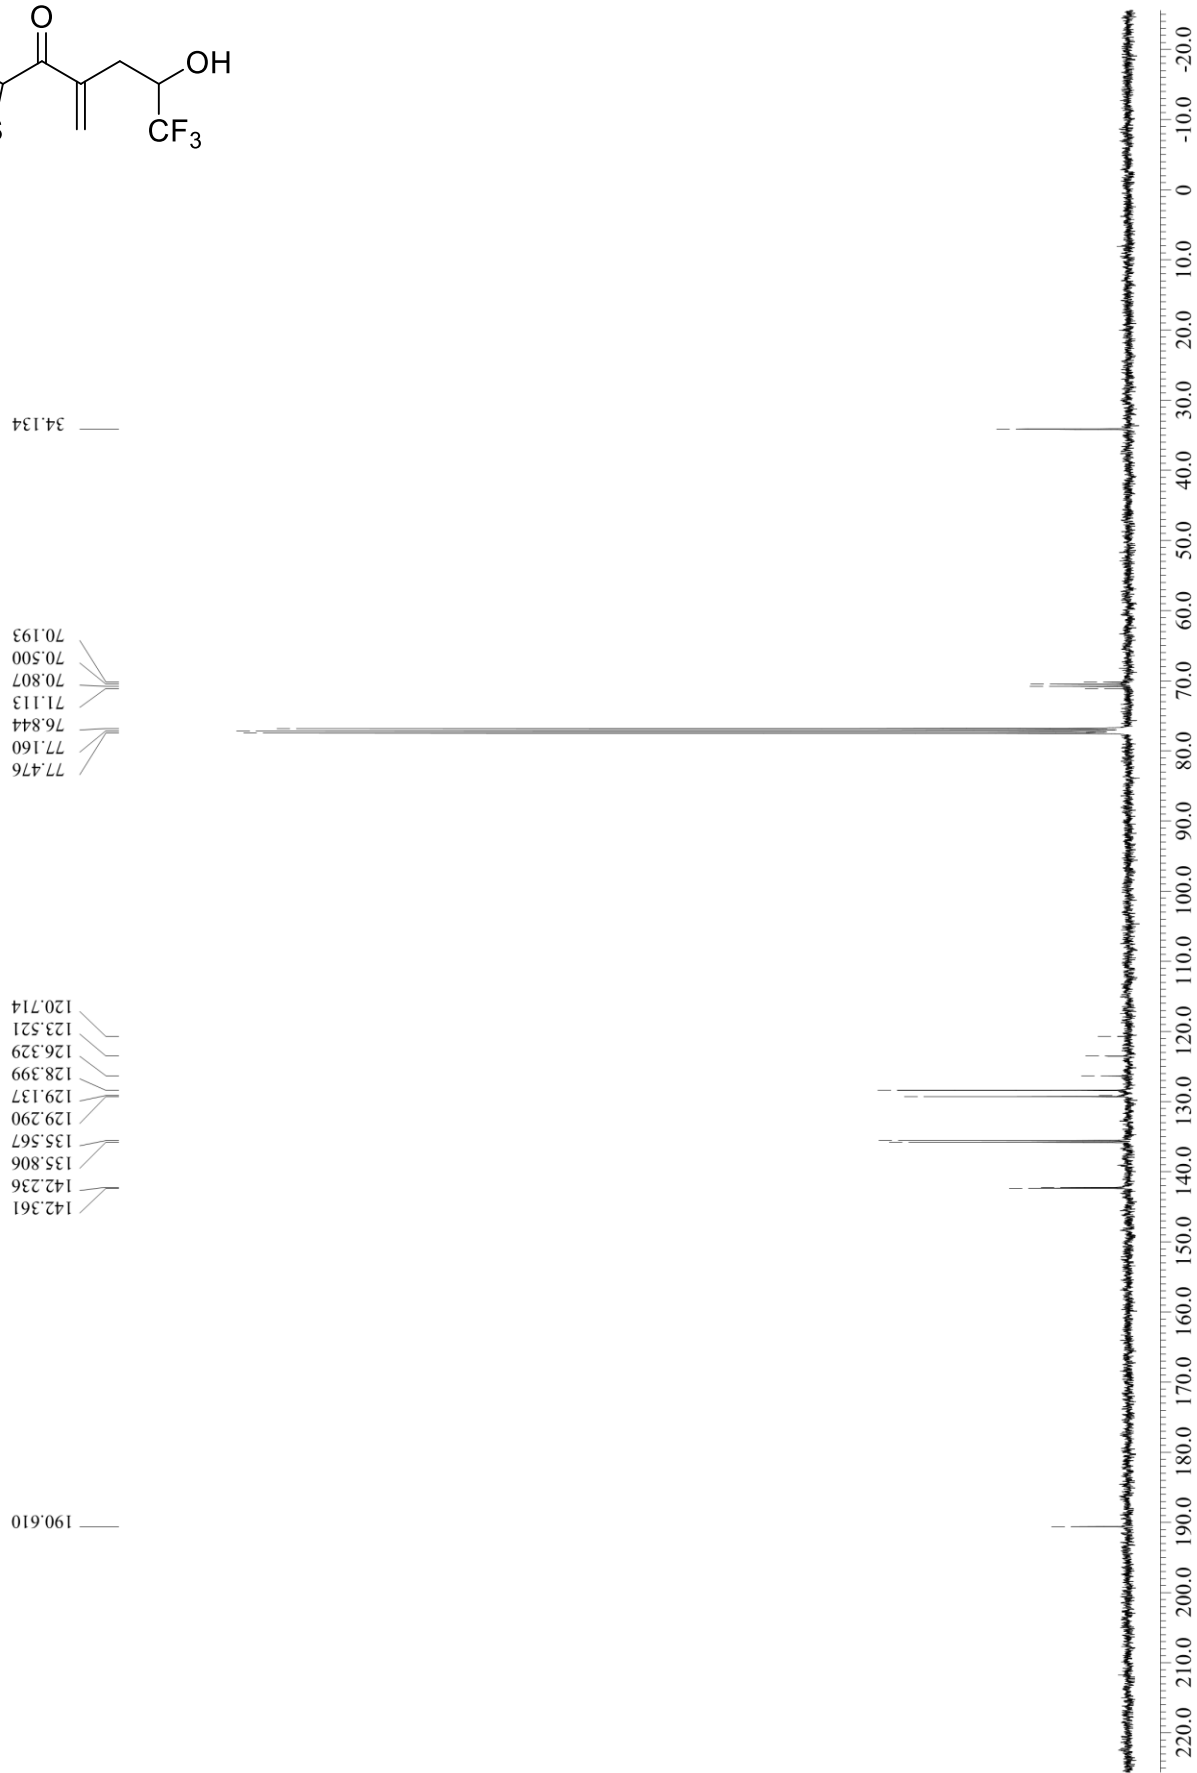

$^{19}\text{F}$  NMR of **9o** ( $\text{CDCl}_3$ , 375 MHz, 25 °C)

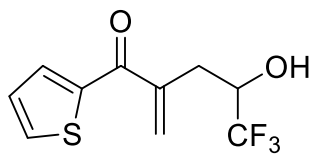

-79.338  
-79.322

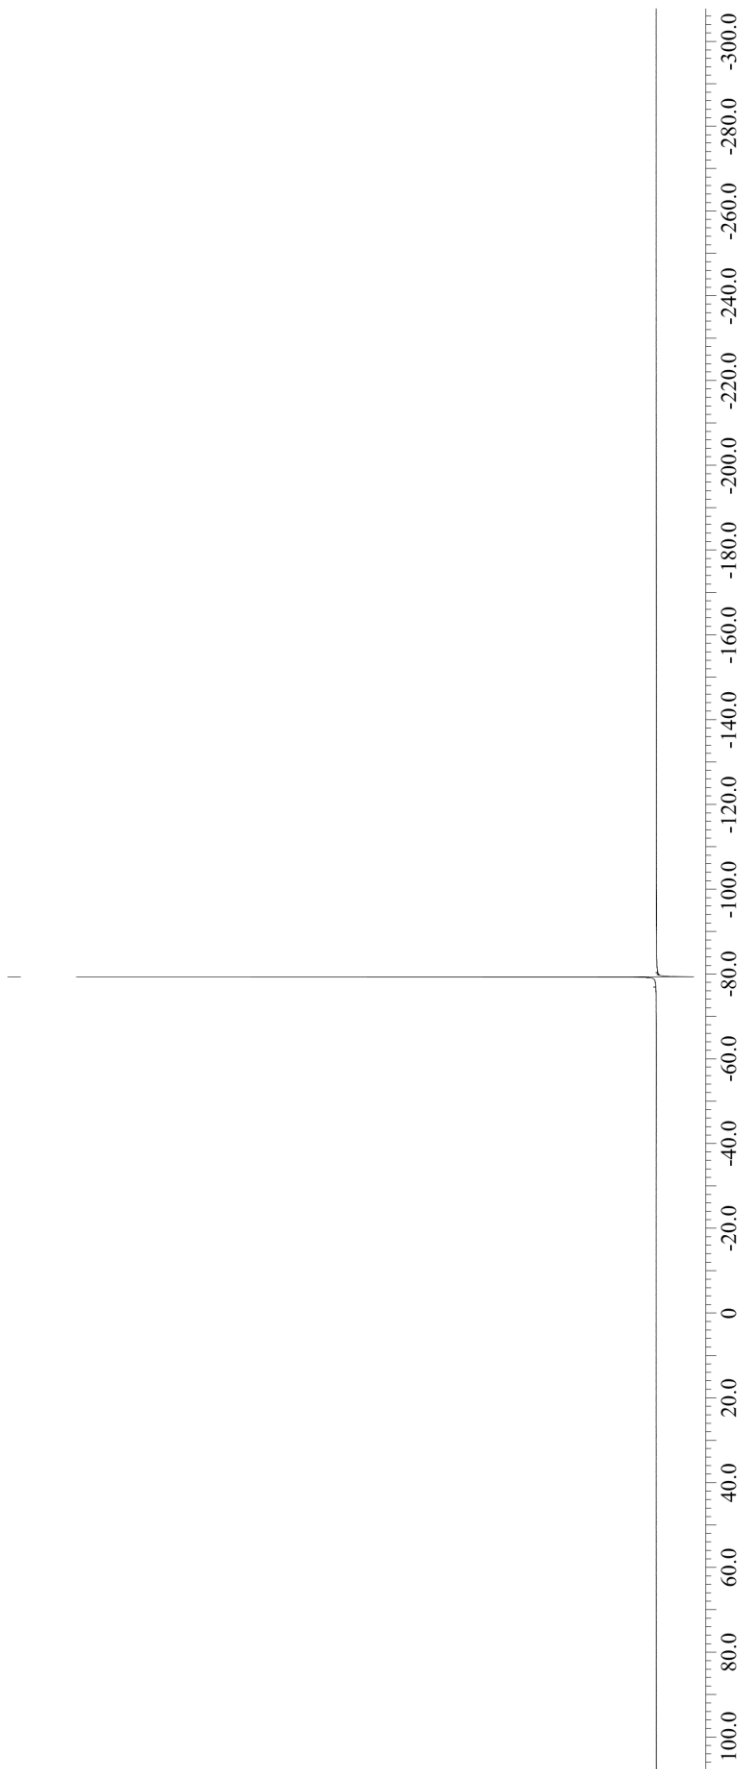

$^1\text{H}$  NMR of **9p** ( $\text{CDCl}_3$ , 400 MHz, 25 °C)

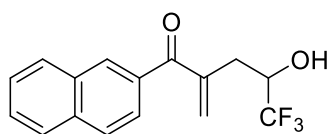

2.964  
2.957  
2.928  
2.921  
2.830  
2.806  
2.794  
2.771

4.414  
4.404  
4.213  
4.208

6.189  
5.947

8.295  
7.945  
7.924  
7.915  
7.894  
7.879  
7.863  
7.842  
7.639  
7.622  
7.604  
7.583  
7.565  
7.546  
7.261

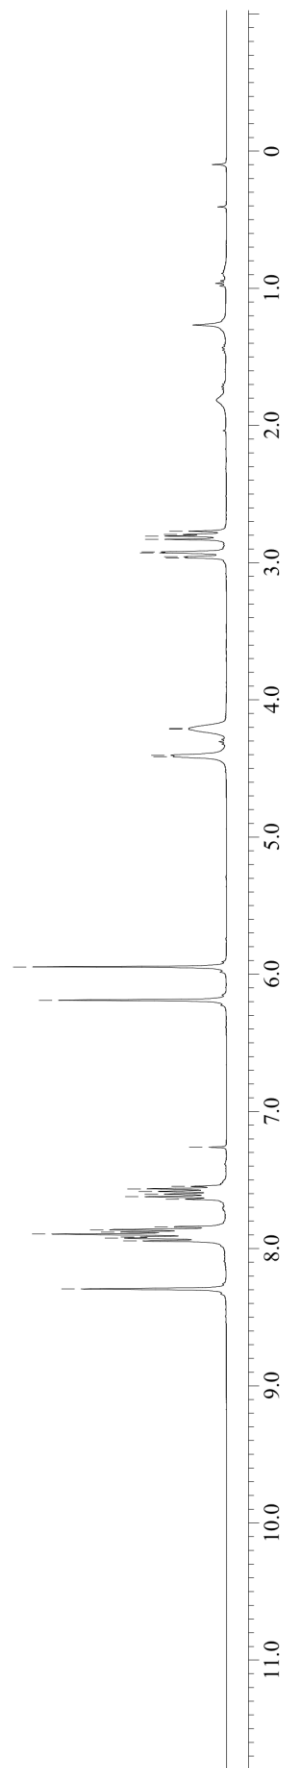

$^{13}\text{C}$  NMR of **9p** ( $\text{CDCl}_3$ , 100 MHz, 25 °C)

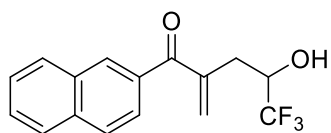

33.961

77.476  
77.160  
76.844  
71.104  
70.797  
70.490  
70.174

142.351  
135.653  
133.890  
132.232  
132.136  
131.724  
129.616  
129.223  
128.840  
128.658  
127.968  
127.144  
126.415  
125.495  
123.608  
120.800

199.512

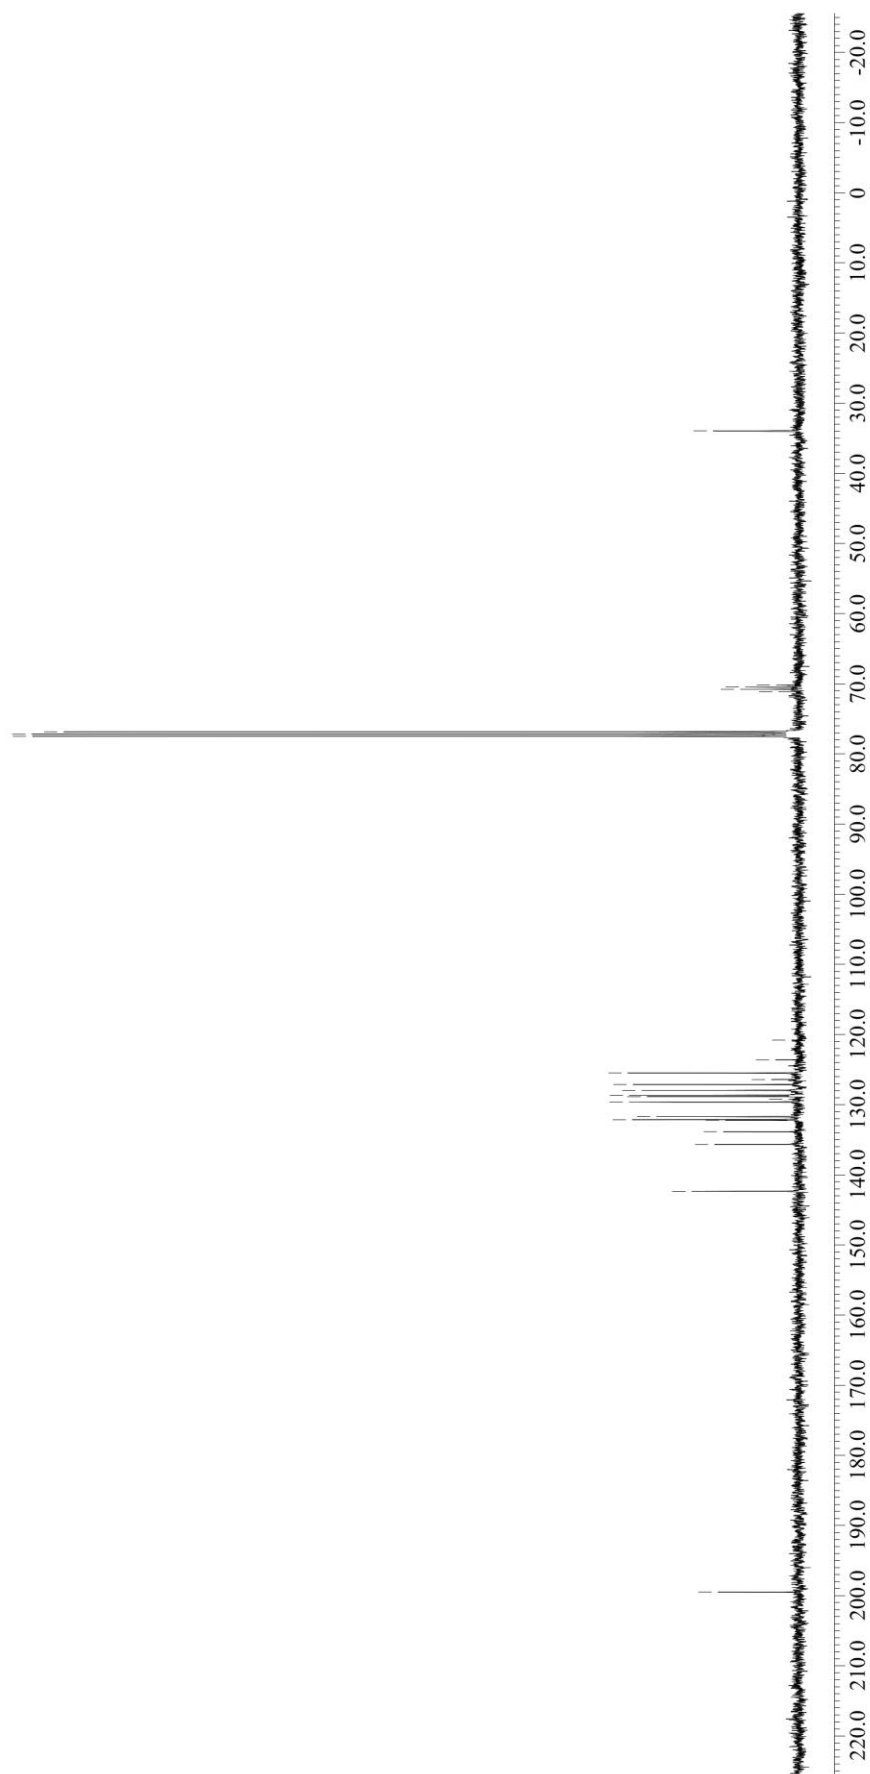



$^{19}\text{F}$  NMR of **9p** ( $\text{CDCl}_3$ , 375 MHz, 25  $^\circ\text{C}$ )

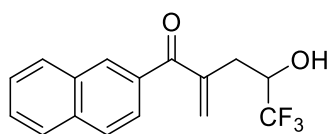

-79.330  
-79.314

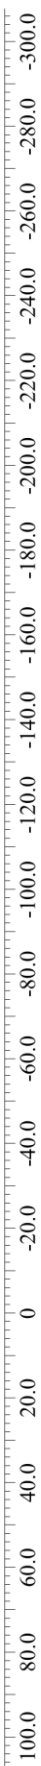

$^1\text{H}$  NMR of **9q** ( $\text{CDCl}_3$ , 400 MHz, 25 °C)

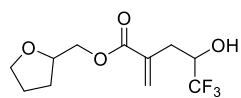

1.619  
1.646  
1.667  
1.920  
1.935  
1.952  
1.969  
2.016  
2.029  
2.046  
2.062  
2.612  
2.648  
2.672  
2.749  
2.784  
3.802  
3.820  
3.885  
4.109  
4.119  
4.135  
4.149  
4.167  
4.174  
4.193  
4.210

5.798

6.387

7.261

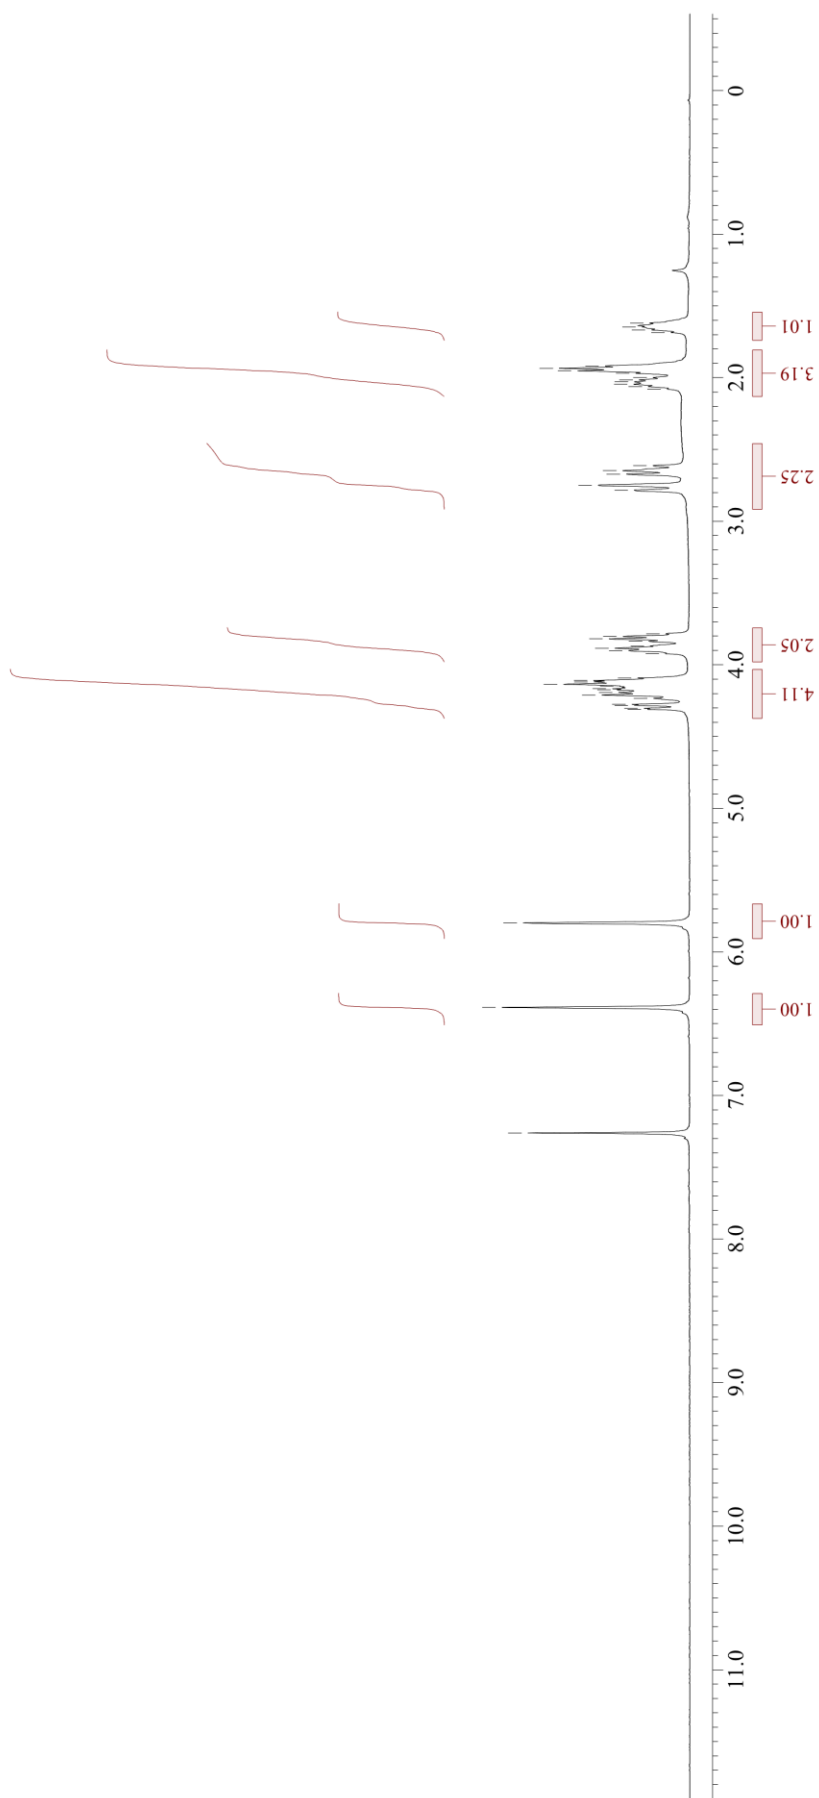

$^{13}\text{C}$  NMR of **9q** ( $\text{CDCl}_3$ , 100 MHz, 25  $^\circ\text{C}$ )

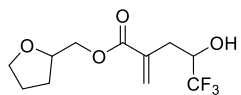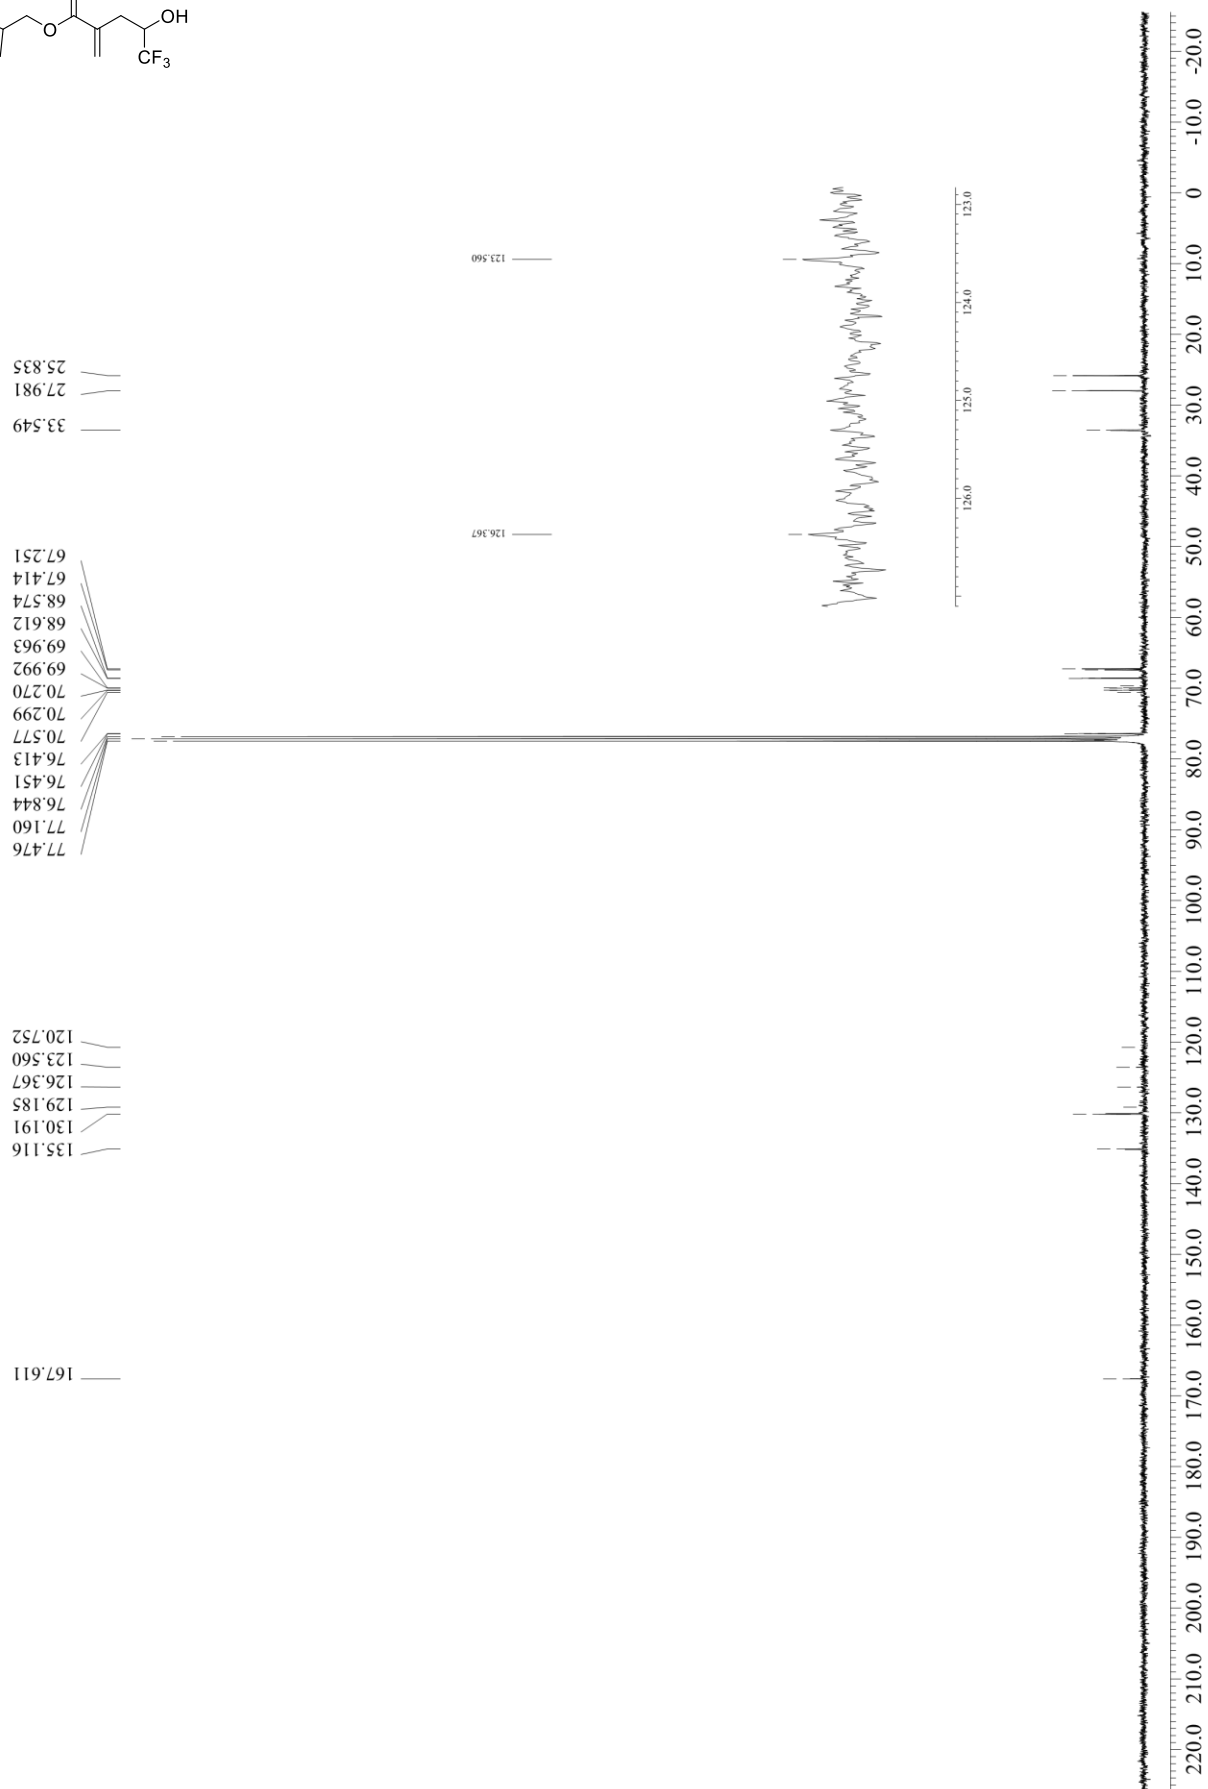

$^{19}\text{F}$  NMR of **9q** ( $\text{CDCl}_3$ , 375 MHz, 25 °C)

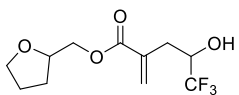

-79.687  
-79.671  
-79.639  
-79.623

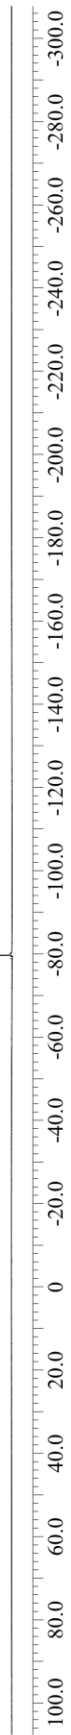

$^1\text{H}$  NMR of **9r** ( $\text{CDCl}_3$ , 400 MHz, 25 °C)

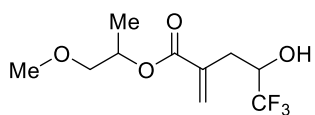

1.271  
1.287

2.576  
2.589  
2.612  
2.688  
2.705  
2.766  
2.771  
2.802  
3.365  
3.455  
3.464  
3.472  
4.031  
4.047  
4.148  
4.158  
4.164  
4.172

5.130  
5.139  
5.145  
5.151  
5.161

5.743  
5.769

6.340  
6.349

7.261

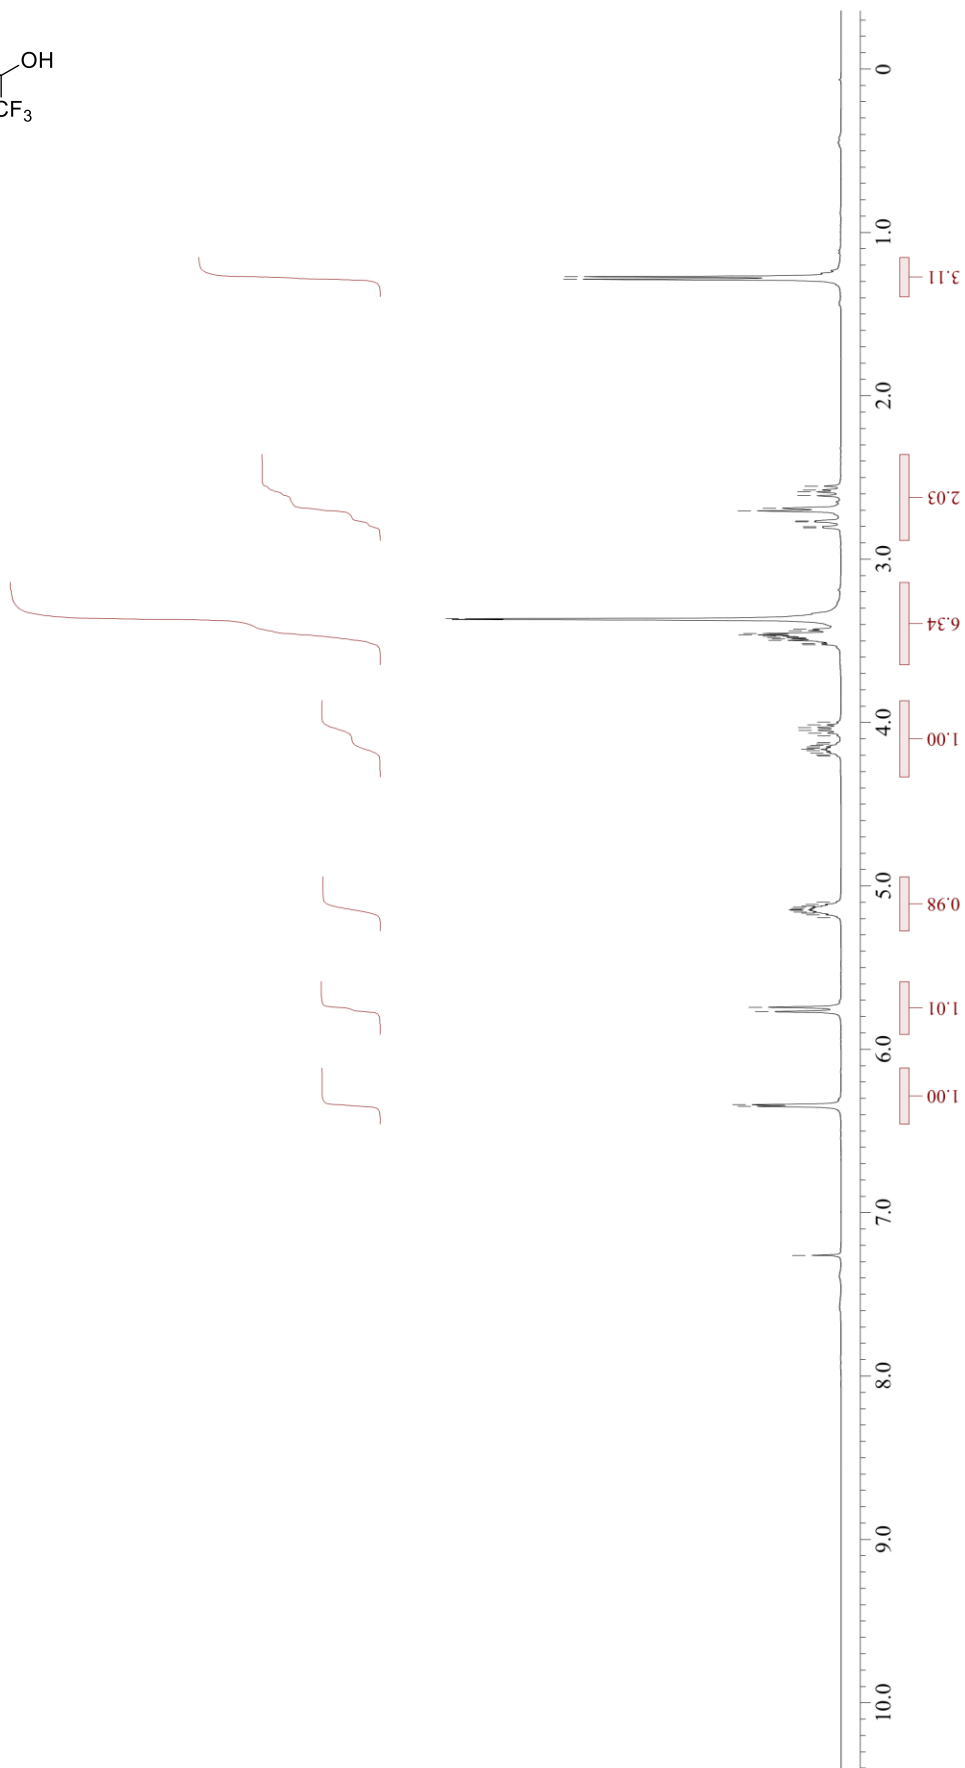

$^{13}\text{C}$  NMR of **9r** ( $\text{CDCl}_3$ , 100 MHz, 25 °C)

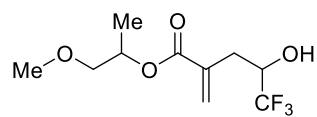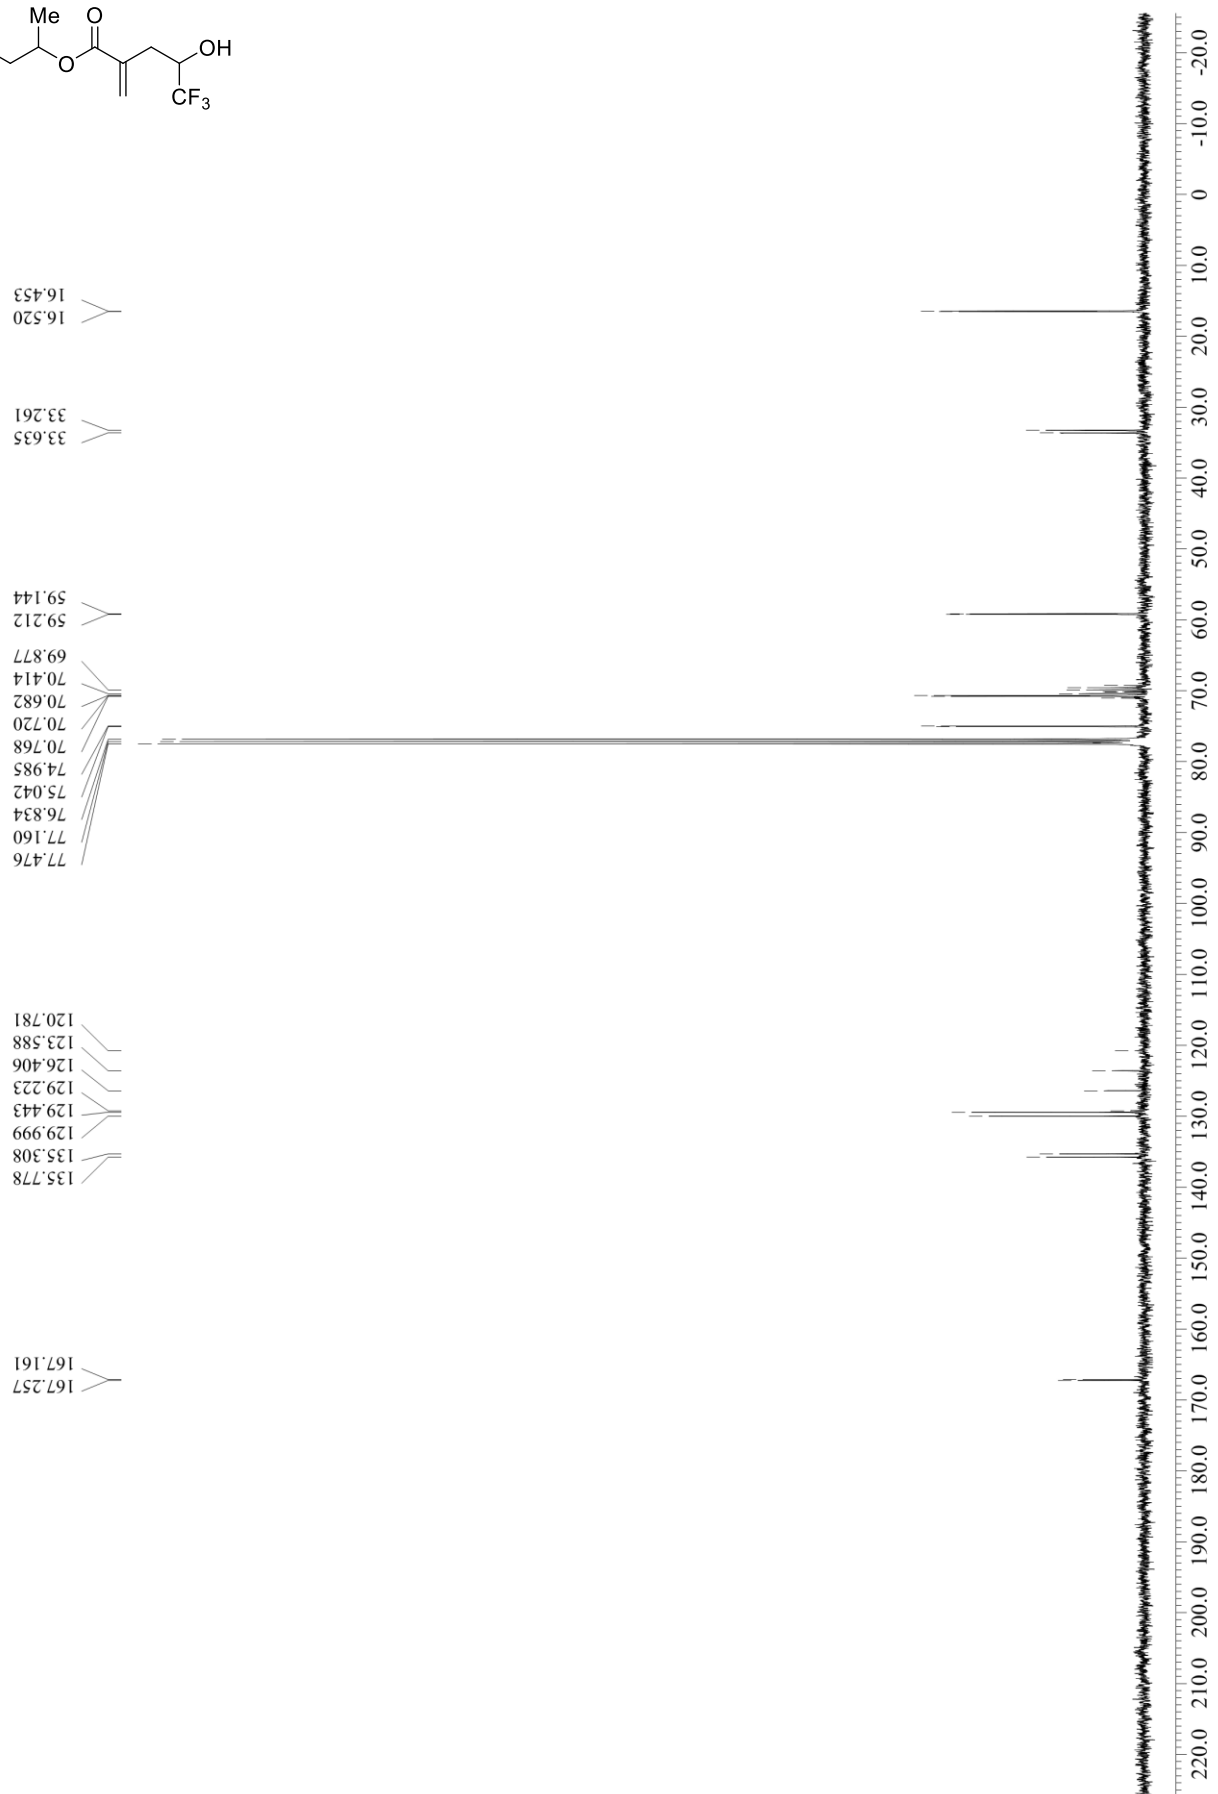

$^{19}\text{F}$  NMR of **9r** ( $\text{CDCl}_3$ , 375 MHz, 25  $^\circ\text{C}$ )

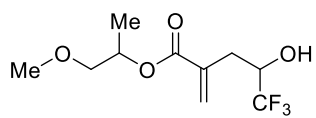

-79.956  
-79.932  
-79.560  
-79.536

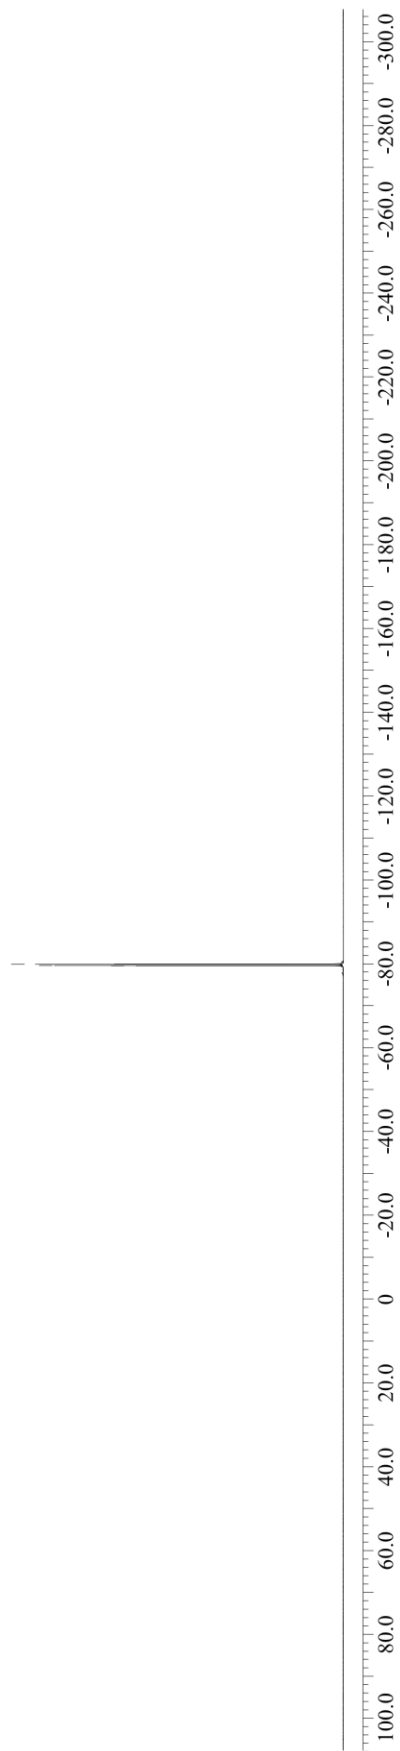

<sup>1</sup>H NMR of **9s** (CDCl<sub>3</sub>, 400 MHz, 25 °C)

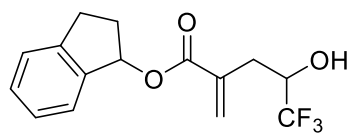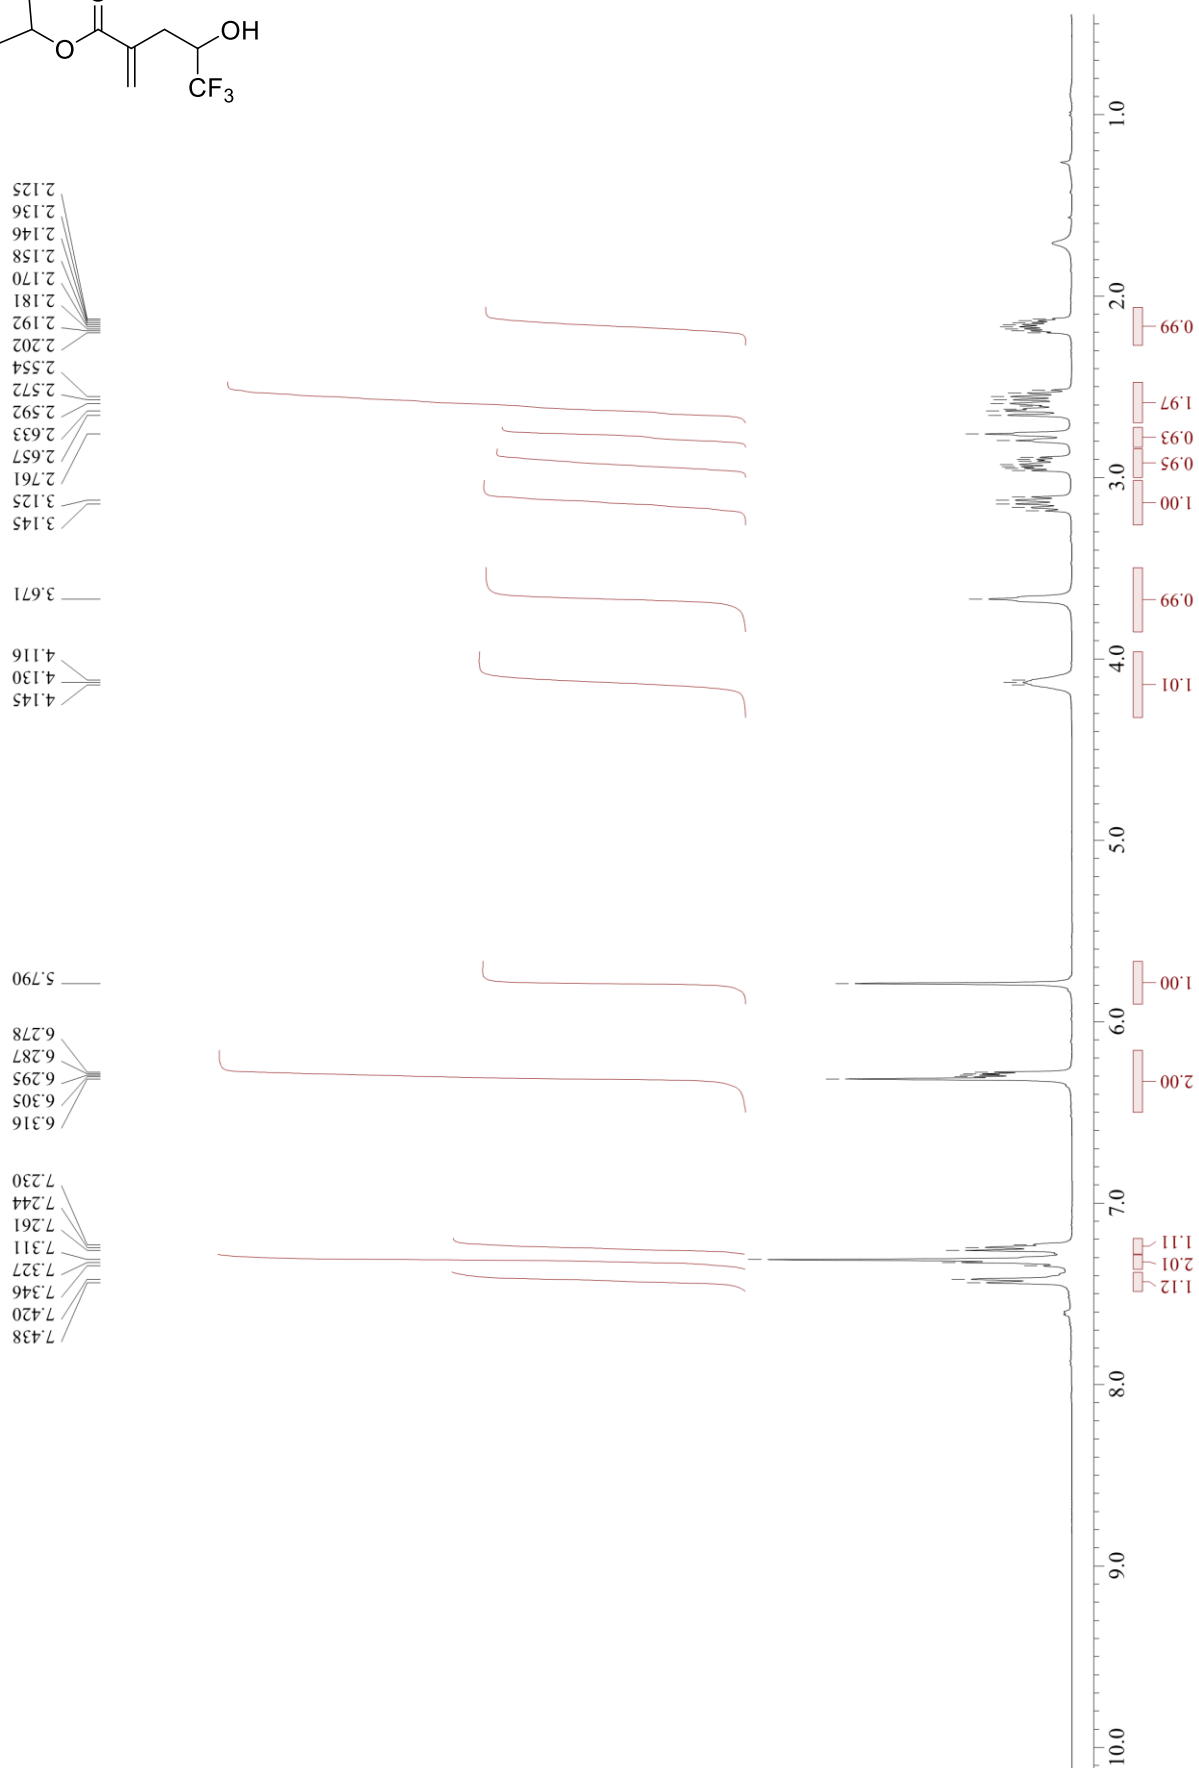



$^{13}\text{C}$  NMR of **9s** ( $\text{CDCl}_3$ , 100 MHz, 25 °C)

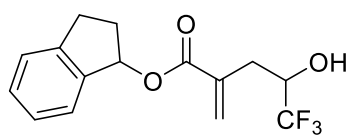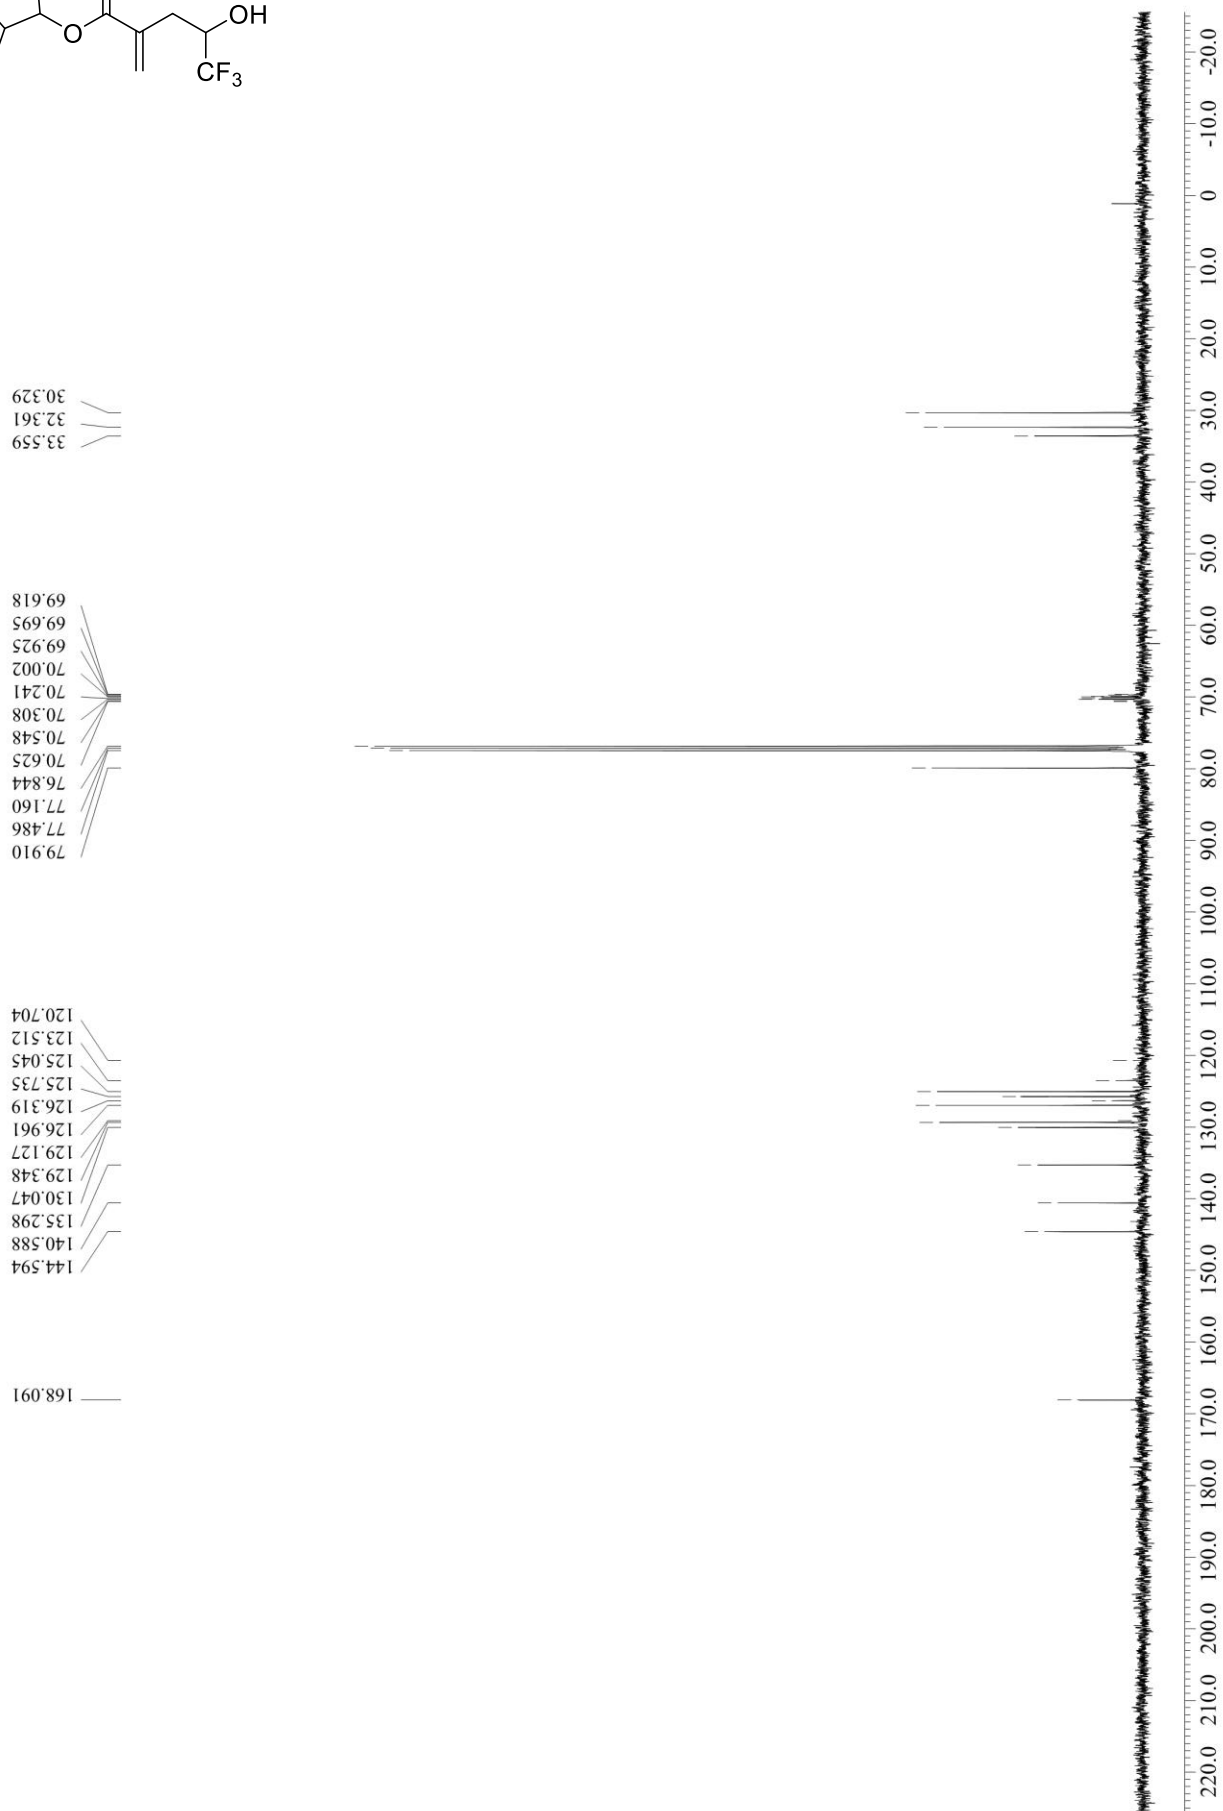

$^{19}\text{F}$  NMR of **9s** ( $\text{CDCl}_3$ , 375 MHz, 25 °C)

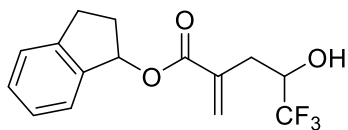

-79.520  
-79.536

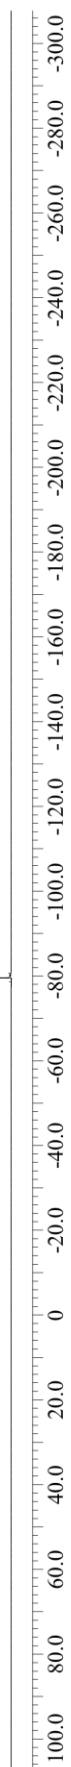

$^1\text{H}$  NMR of **9t** ( $\text{CDCl}_3$ , 400 MHz, 25 °C)

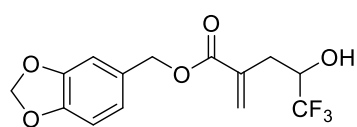

7.261  
6.860  
6.844  
6.803  
6.782  
6.365  
5.970  
5.819  
5.118  
4.144  
4.135  
4.127  
4.119  
4.111  
4.103  
3.116  
2.795  
2.790  
2.759  
2.754  
2.633  
2.609  
2.597  
2.573

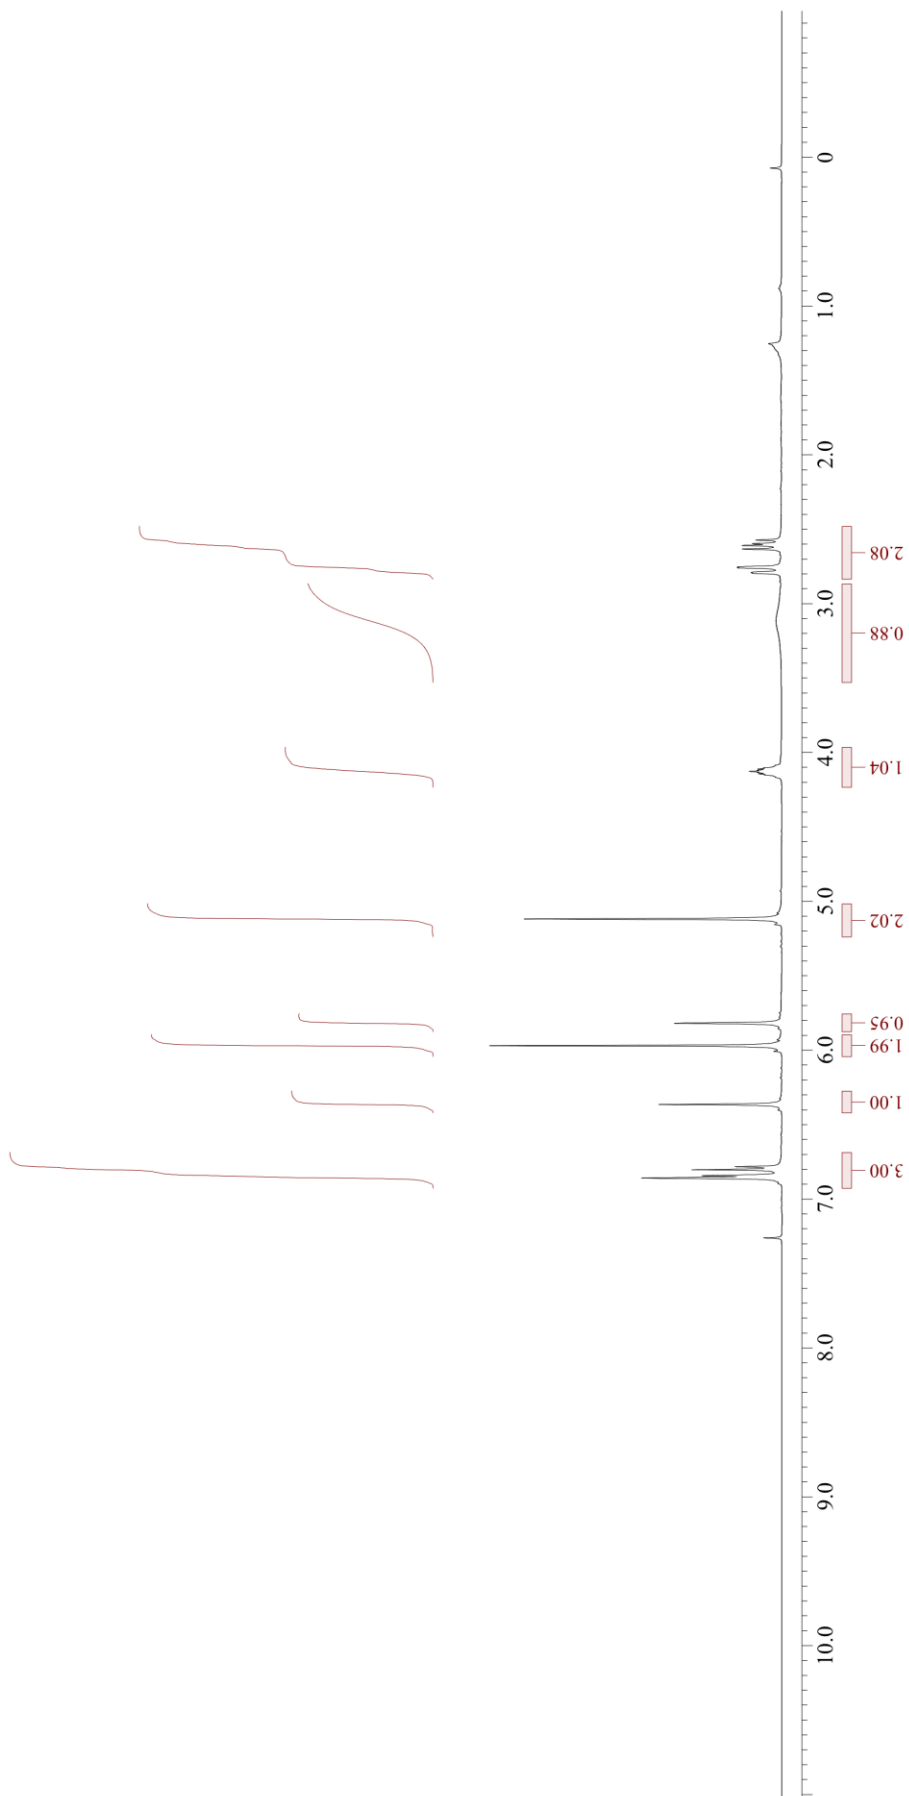

$^{13}\text{C}$  NMR of **9t** ( $\text{CDCl}_3$ , 100 MHz, 25 °C)

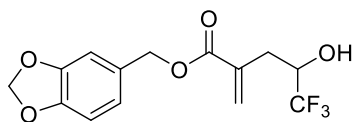

33.453

77.476  
77.160  
76.844  
70.366  
70.059  
69.743  
69.436  
67.386

101.366

109.128  
108.438

120.685  
122.515  
123.493  
126.300  
129.108  
129.156  
130.220  
134.963

147.766  
147.948

167.726

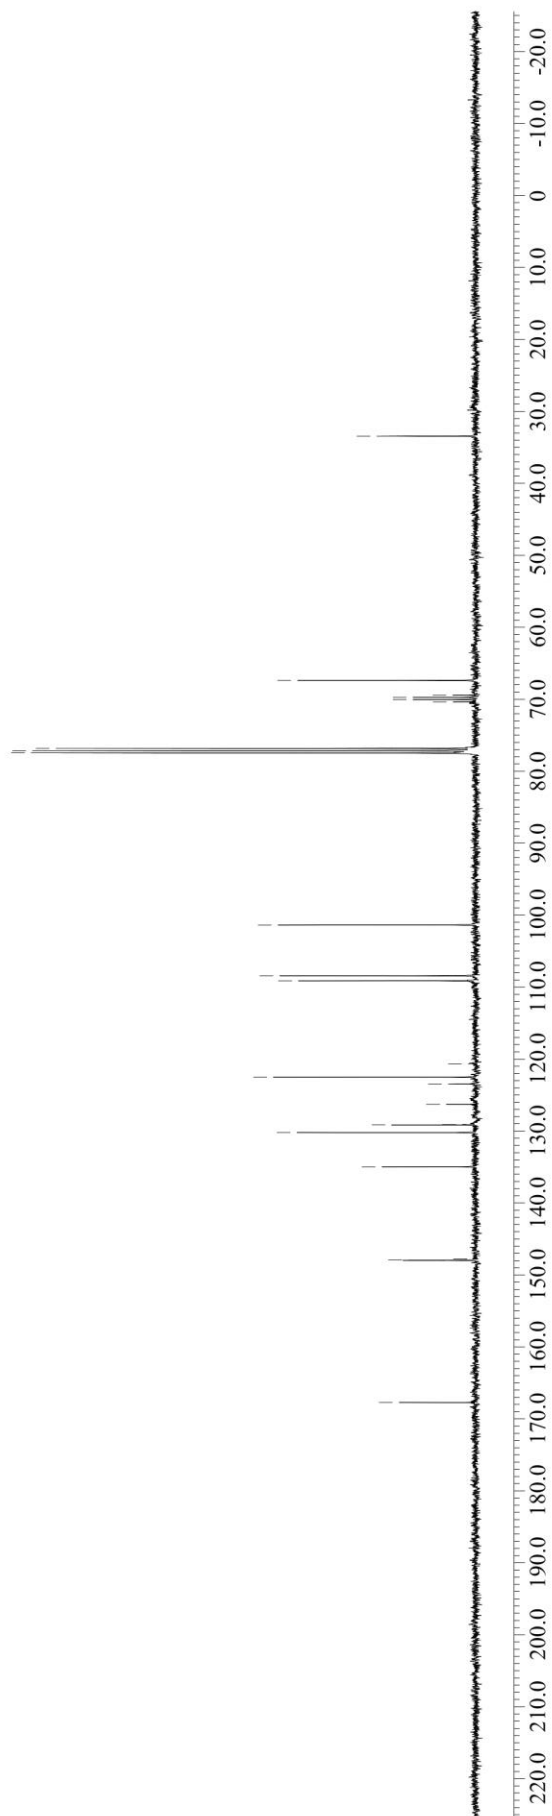

$^{19}\text{F}$  NMR of **9t** ( $\text{CDCl}_3$ , 375 MHz, 25 °C)

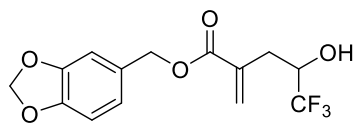

-79.560  
-79.544

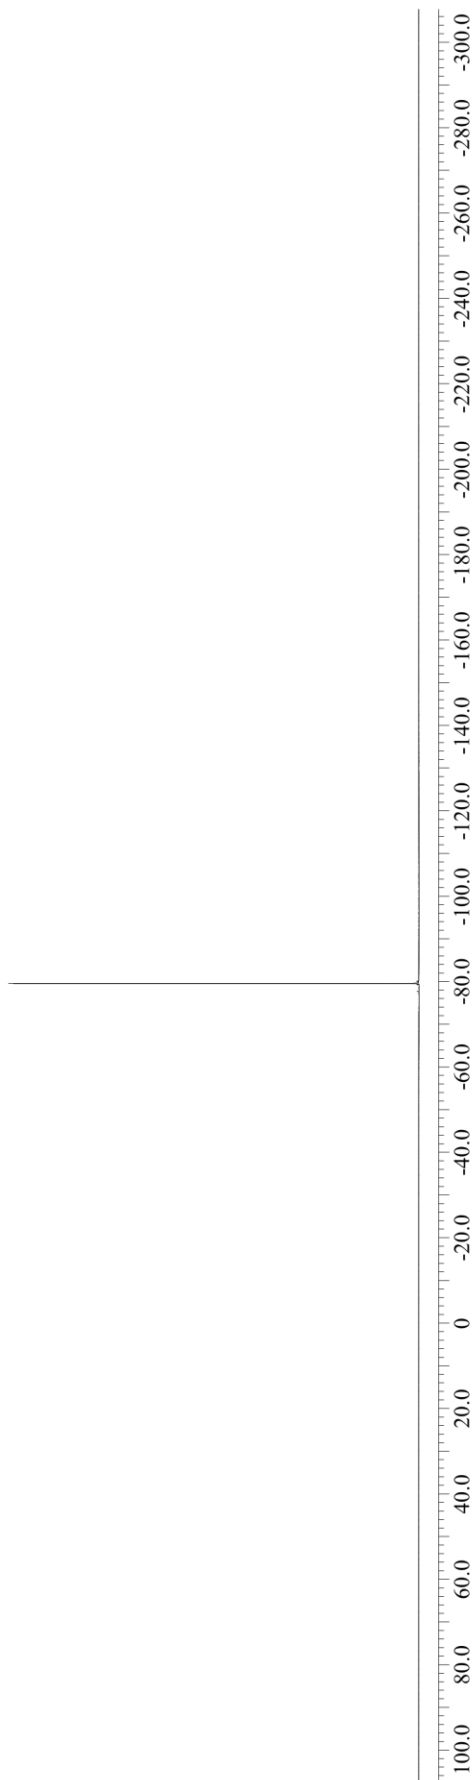

$^1\text{H}$  NMR of **9u** ( $\text{CDCl}_3$ , 400 MHz, 25 °C)

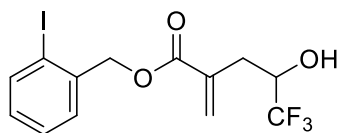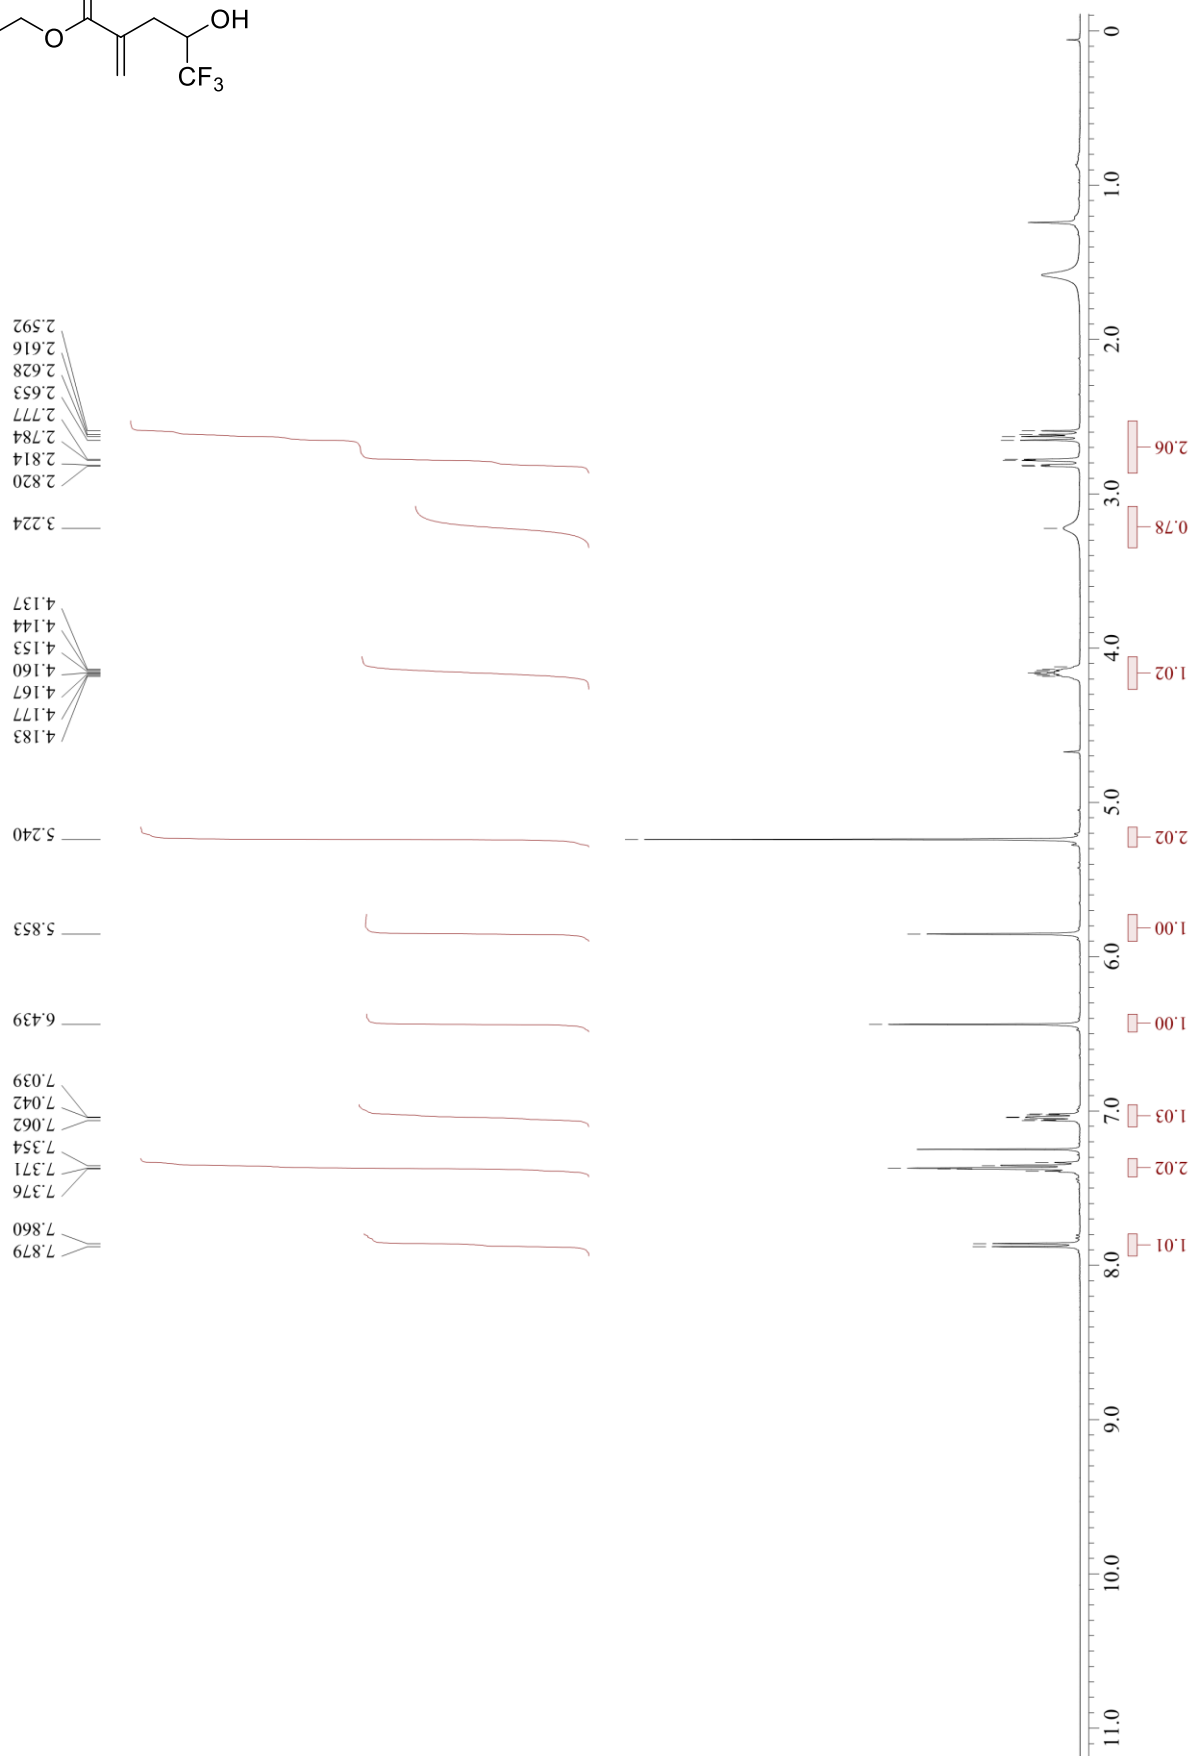

$^{13}\text{C}$  NMR of **9u** ( $\text{CDCl}_3$ , 100 MHz, 25 °C)

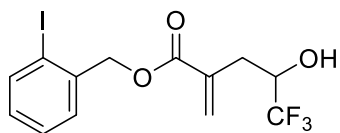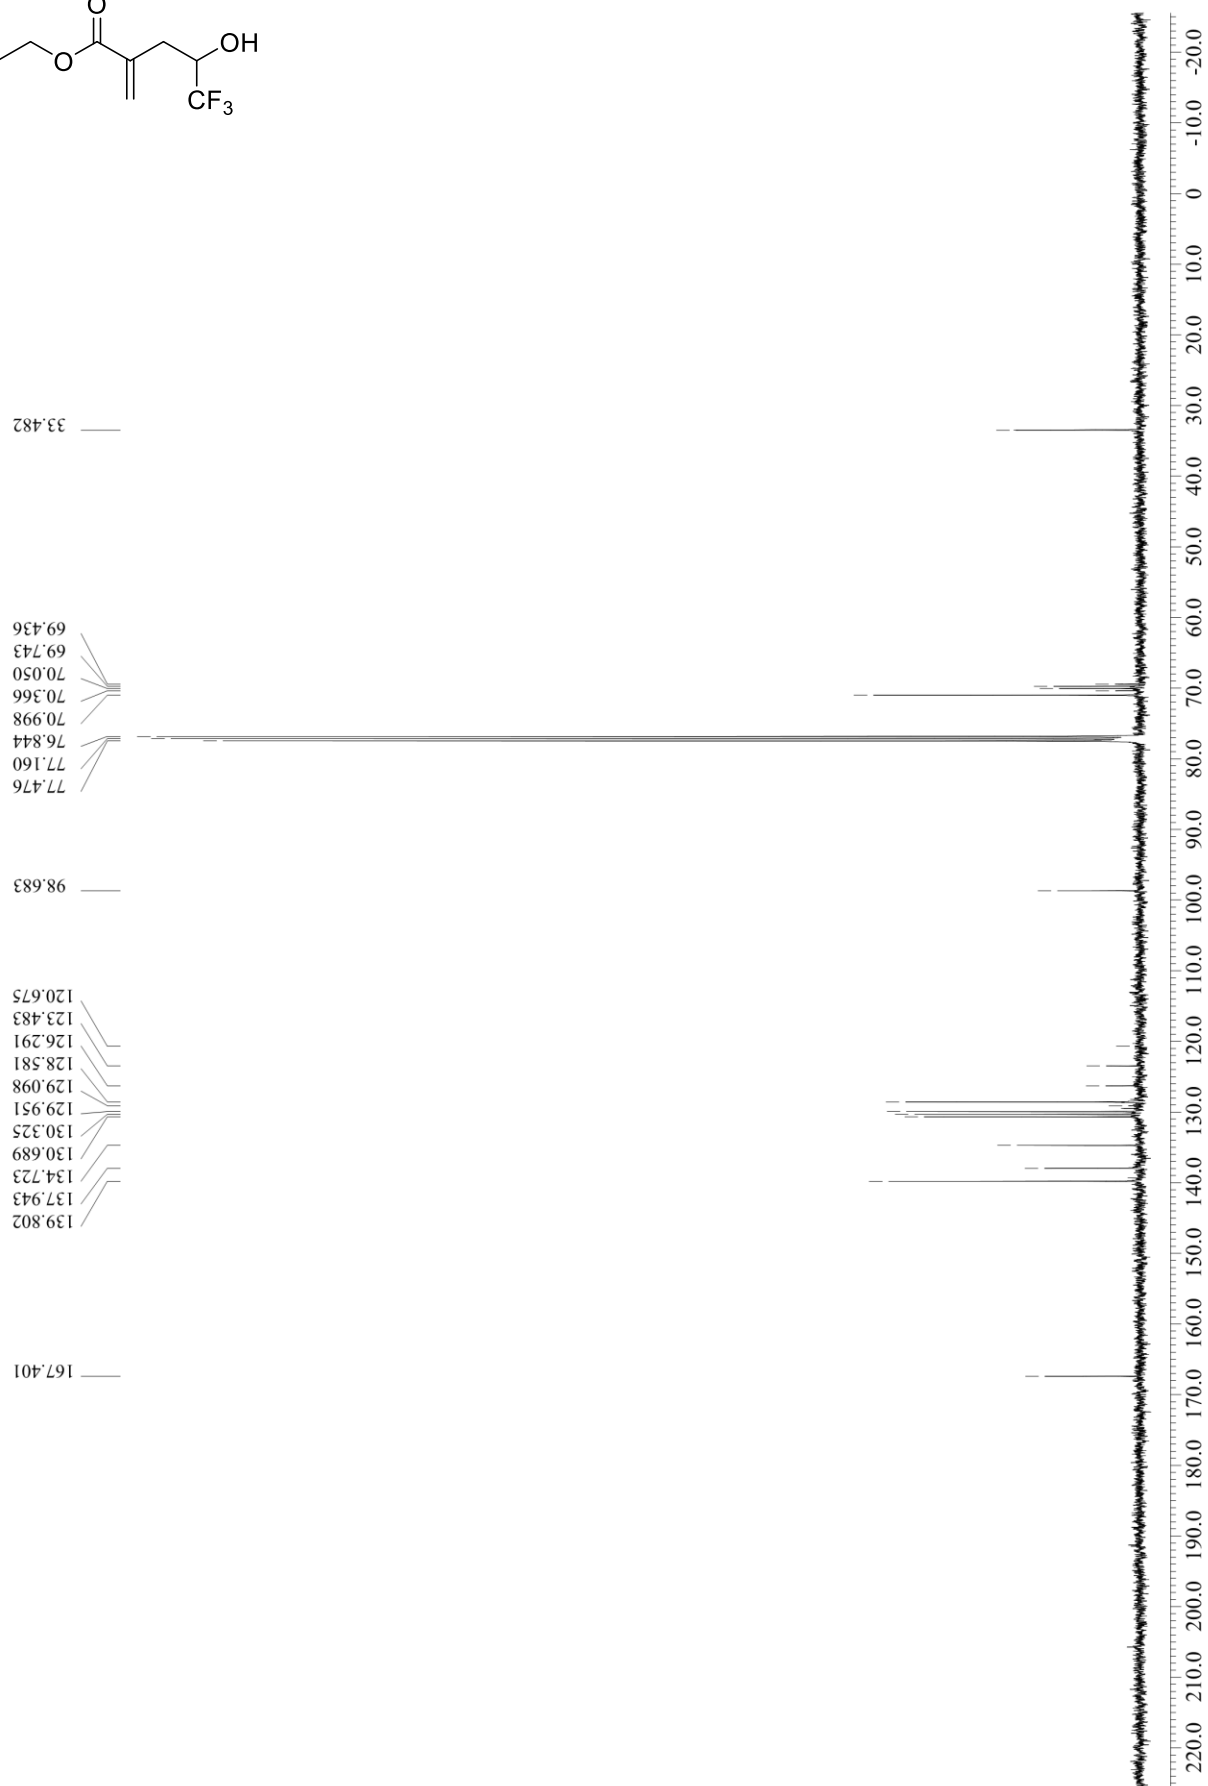

$^{19}\text{F}$  NMR of **9u** ( $\text{CDCl}_3$ , 375 MHz, 25 °C)

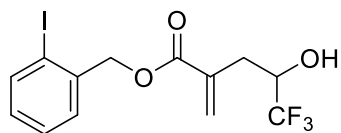

-79.520  
-79.504

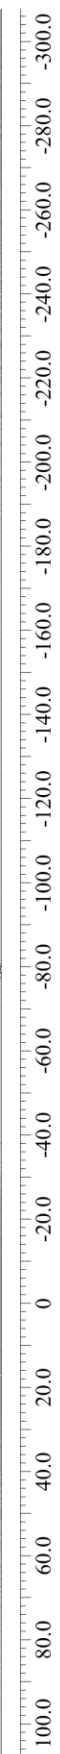



$^1\text{H}$  NMR of **9v** ( $\text{CDCl}_3$ , 400 MHz, 25 °C)

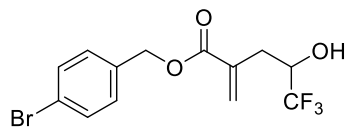

2.586  
2.610  
2.622  
2.646  
2.764  
2.770  
2.800  
2.806

4.109  
4.117  
4.125  
4.133  
4.141  
4.150  
4.157

5.174

5.847

6.386

7.240  
7.261  
7.498  
7.519

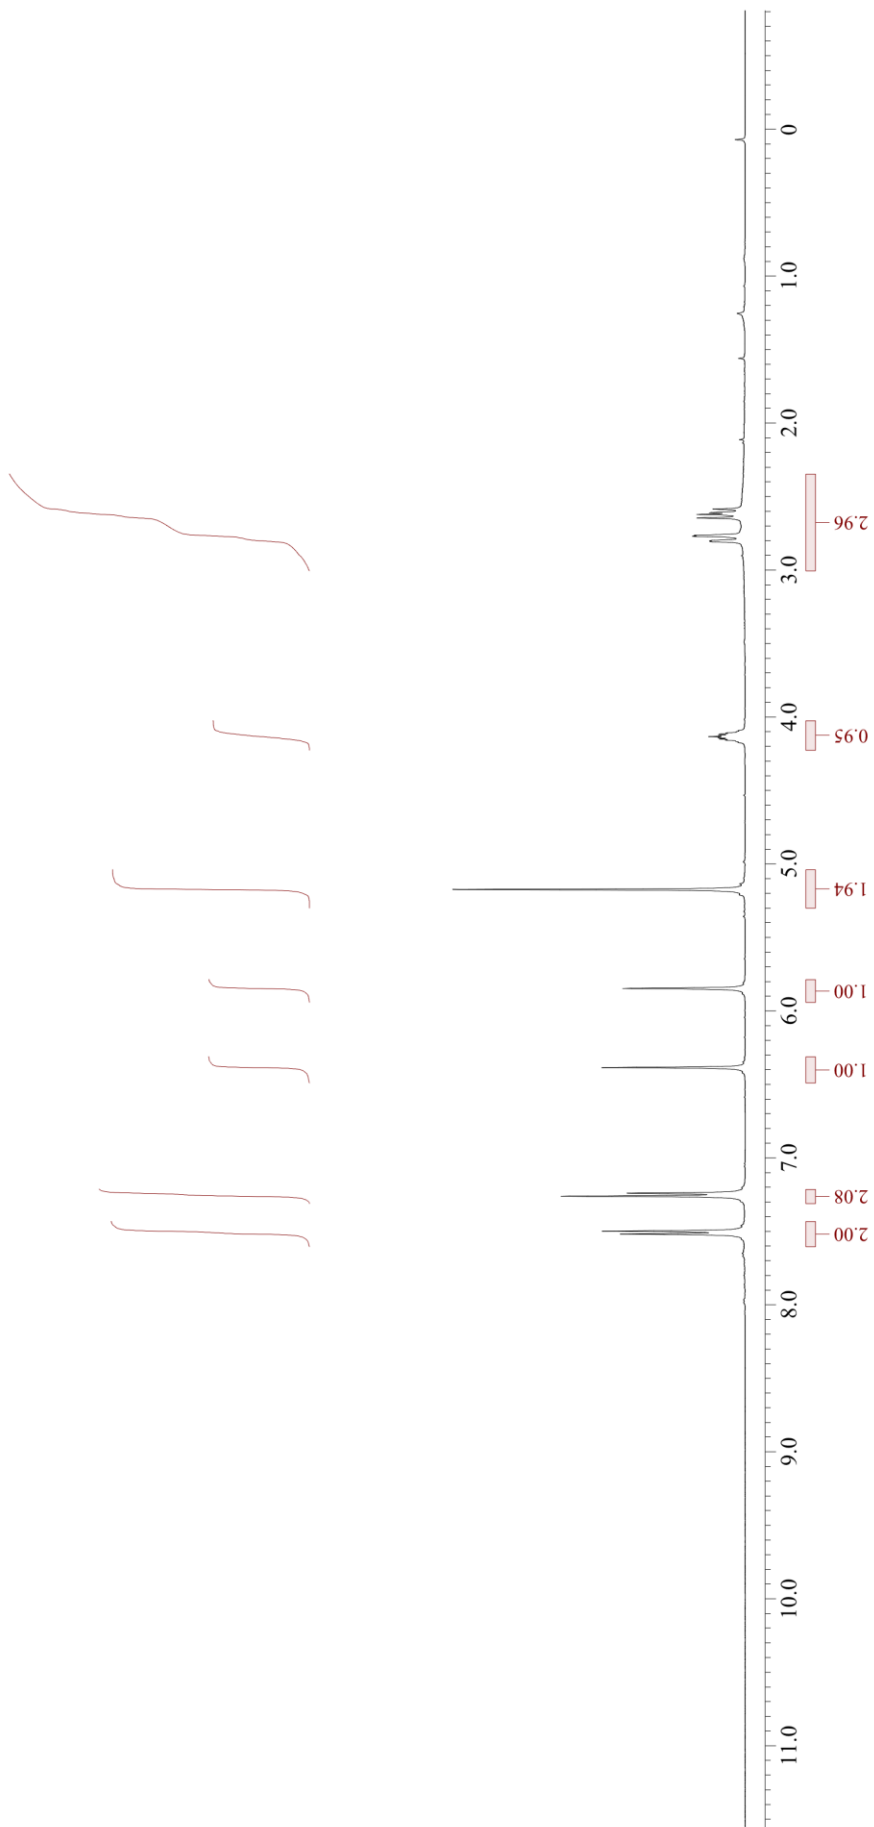

$^{13}\text{C}$  NMR of **9v** ( $\text{CDCl}_3$ , 100 MHz, 25 °C)

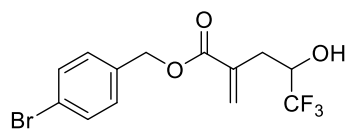

33.415

77.476  
77.160  
76.834  
70.375  
70.069  
69.753  
69.446  
66.581

134.810  
134.474  
131.983  
130.440  
130.047  
129.060  
126.262  
123.464  
122.716  
120.656

167.554

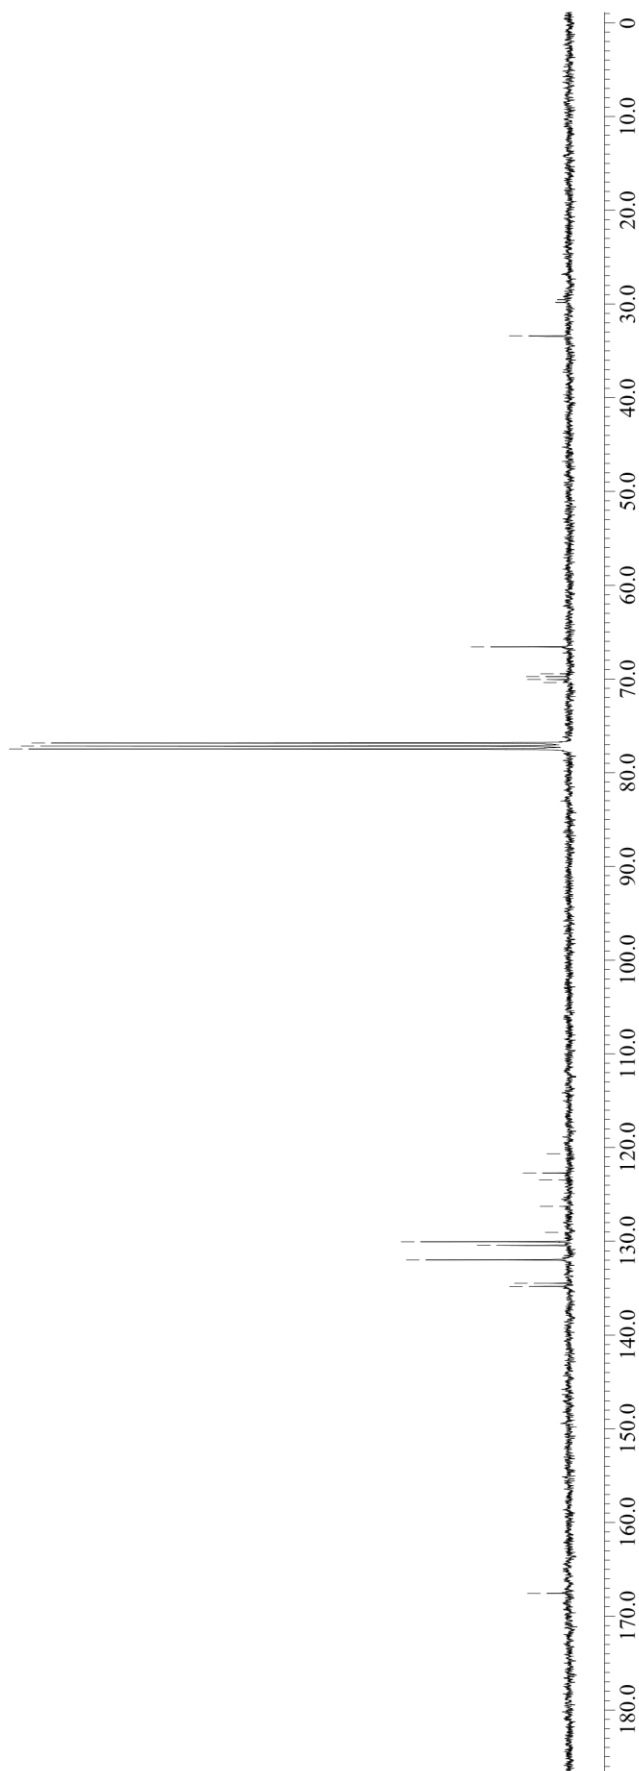

$^{19}\text{F}$  NMR of **9v** ( $\text{CDCl}_3$ , 375 MHz, 25 °C)

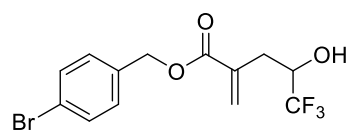

-79.568  
-79.552

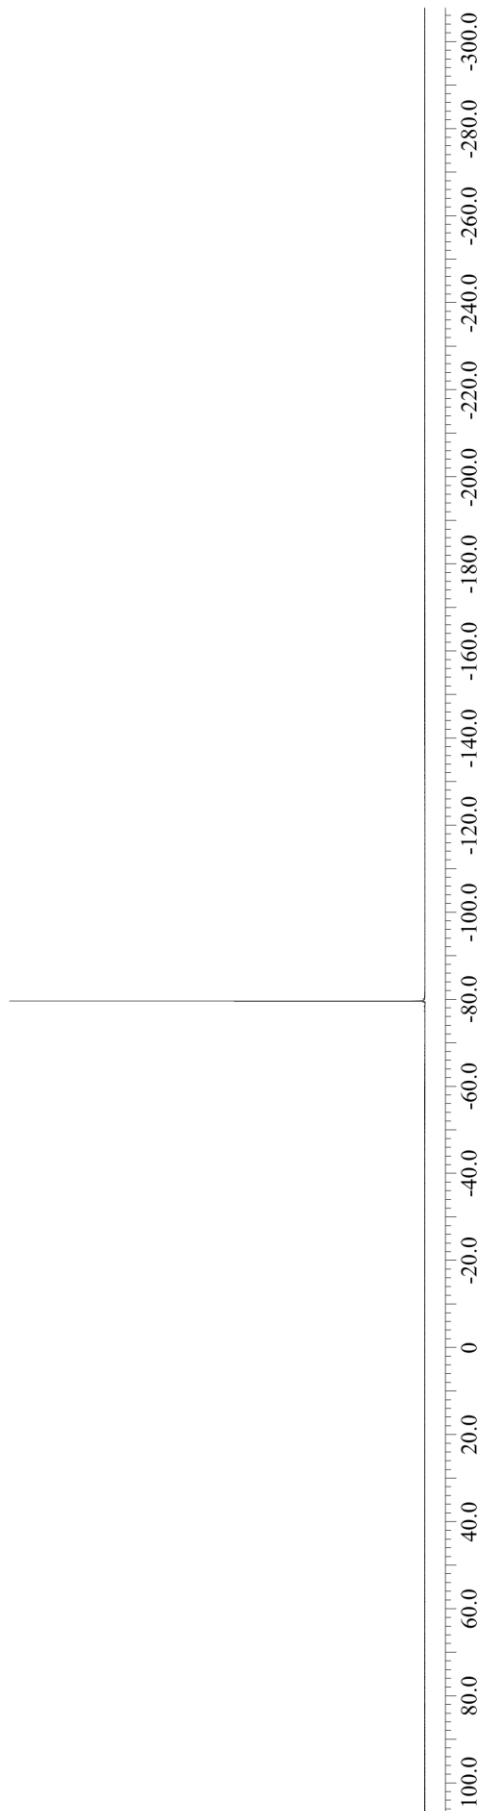

$^1\text{H}$  NMR of **9w** ( $\text{CDCl}_3$ , 400 MHz, 25  $^\circ\text{C}$ )

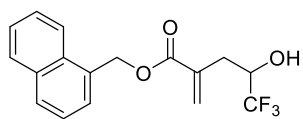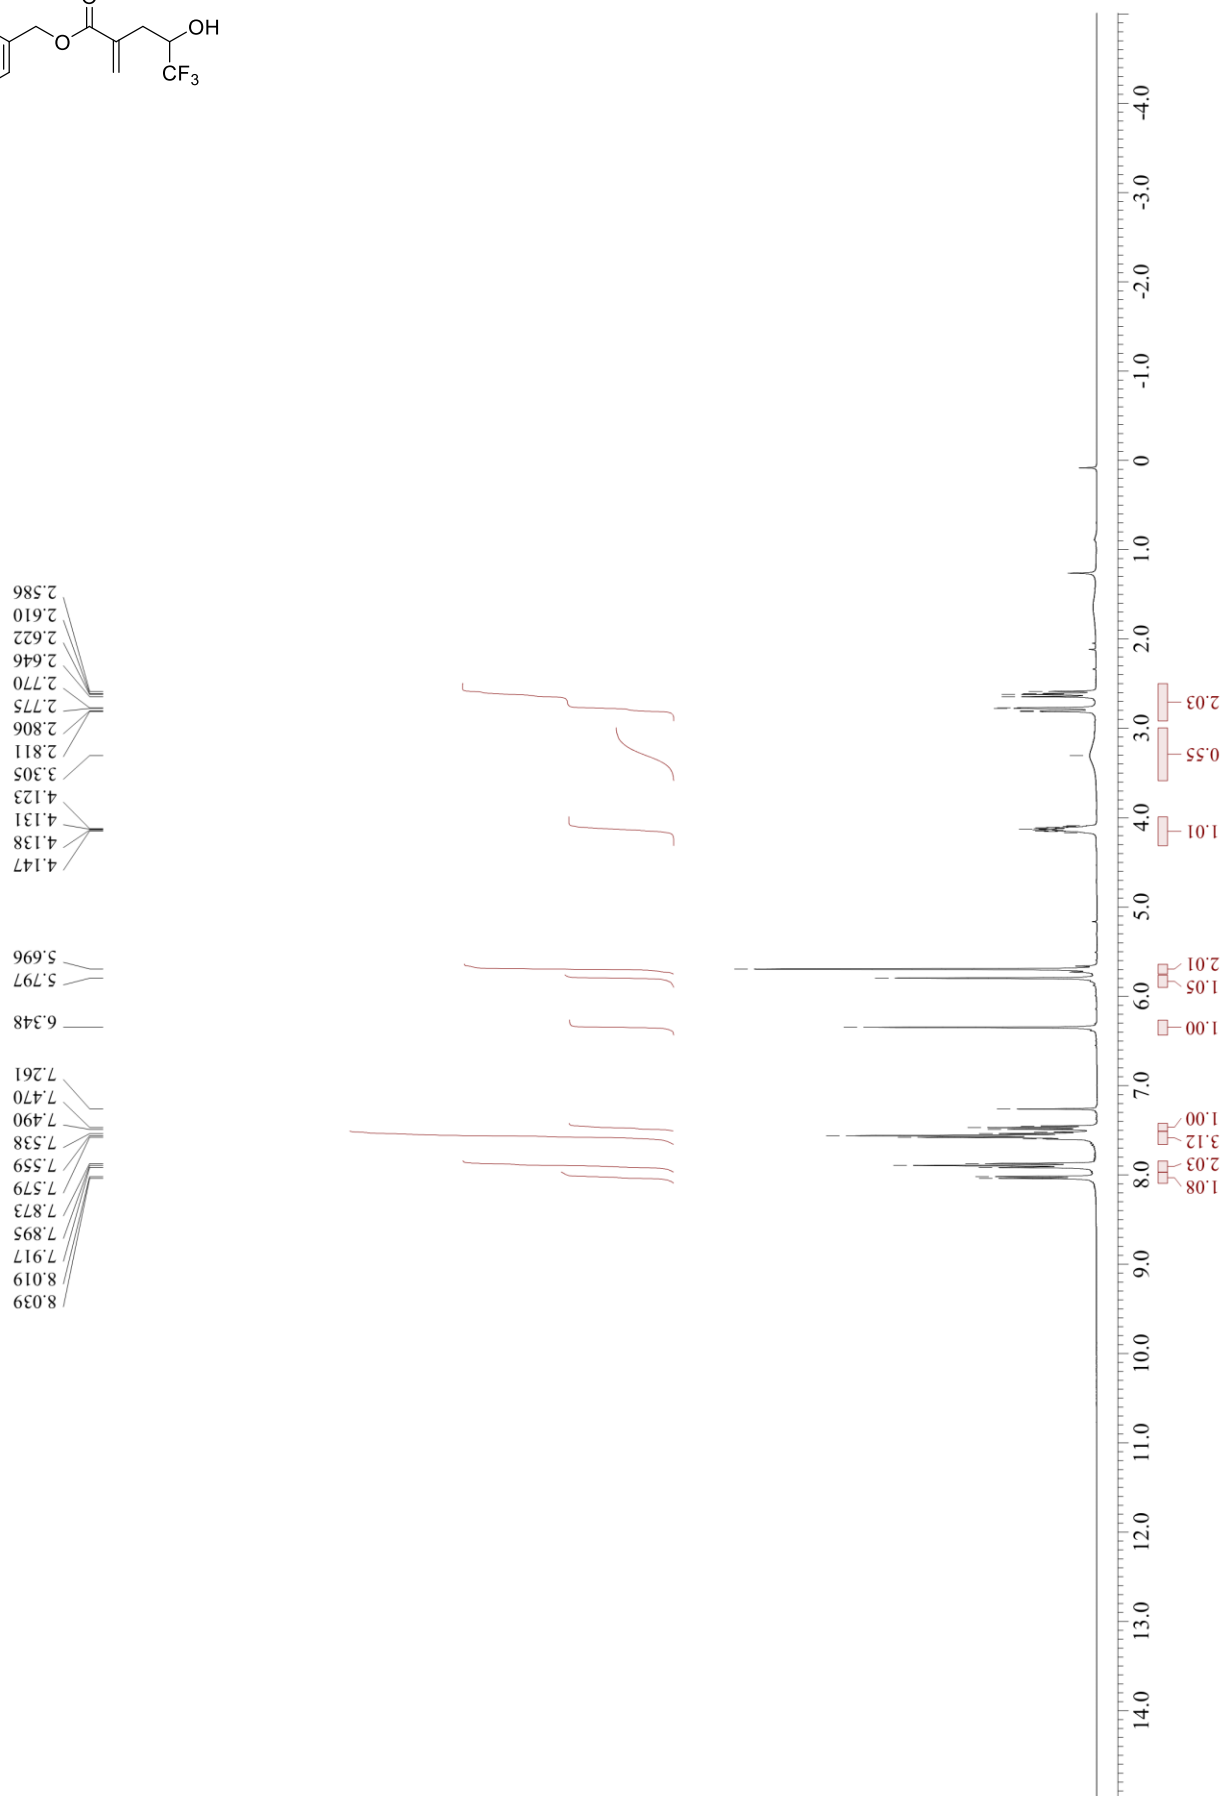

$^{13}\text{C}$  NMR of **9w** ( $\text{CDCl}_3$ , 100 MHz, 25 °C)

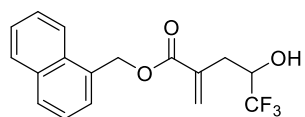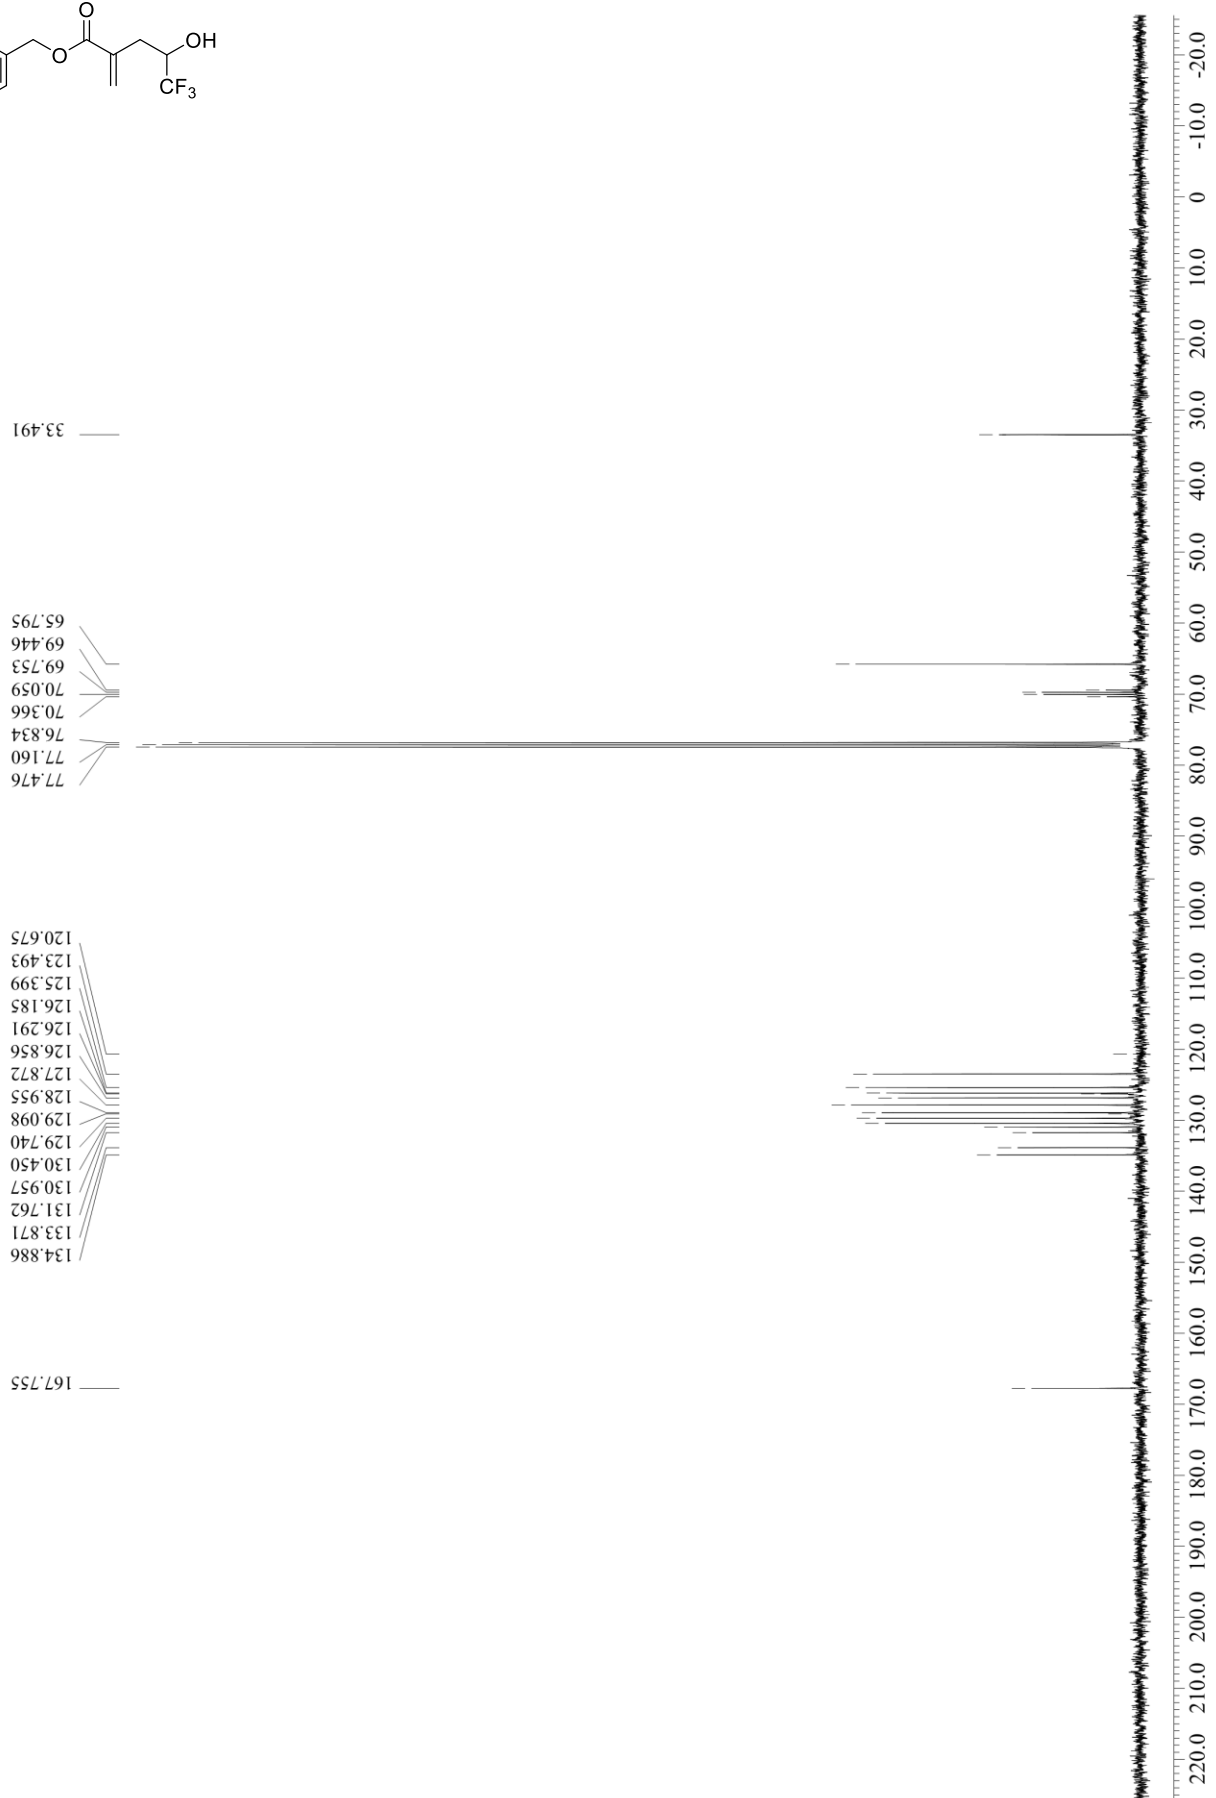

$^{19}\text{F}$  NMR of **9w** ( $\text{CDCl}_3$ , 375 MHz, 25  $^\circ\text{C}$ )

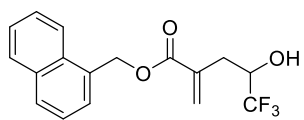

-79.560  
-79.544

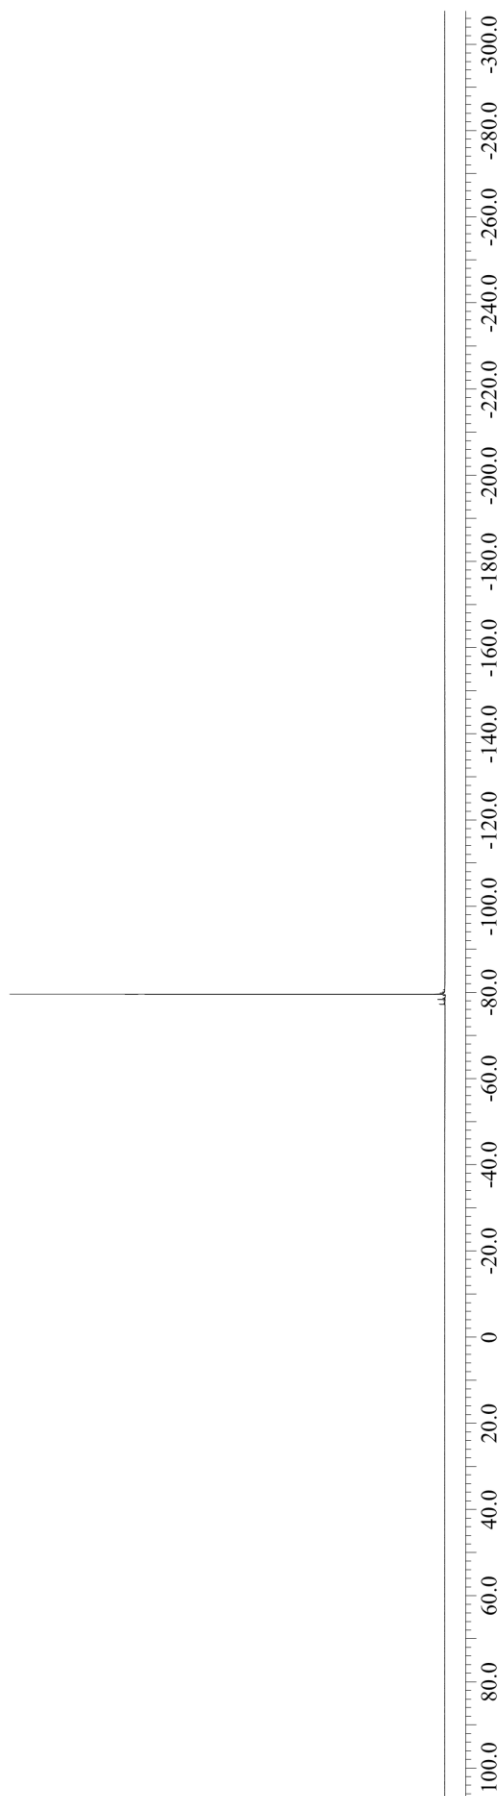

$^1\text{H}$  NMR of **9x** ( $\text{CDCl}_3$ , 400 MHz, 25 °C)

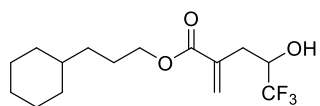

0.867  
0.892  
0.920  
1.118  
1.149  
1.173  
1.203  
1.233  
1.243  
1.262  
1.639  
1.692  
1.715  
2.600  
2.612  
2.635  
2.745  
2.751  
2.781  
2.787  
4.098  
4.105  
4.114  
4.121  
4.129  
4.138  
4.149  
4.166  
4.183  
5.801  
6.339  
7.261

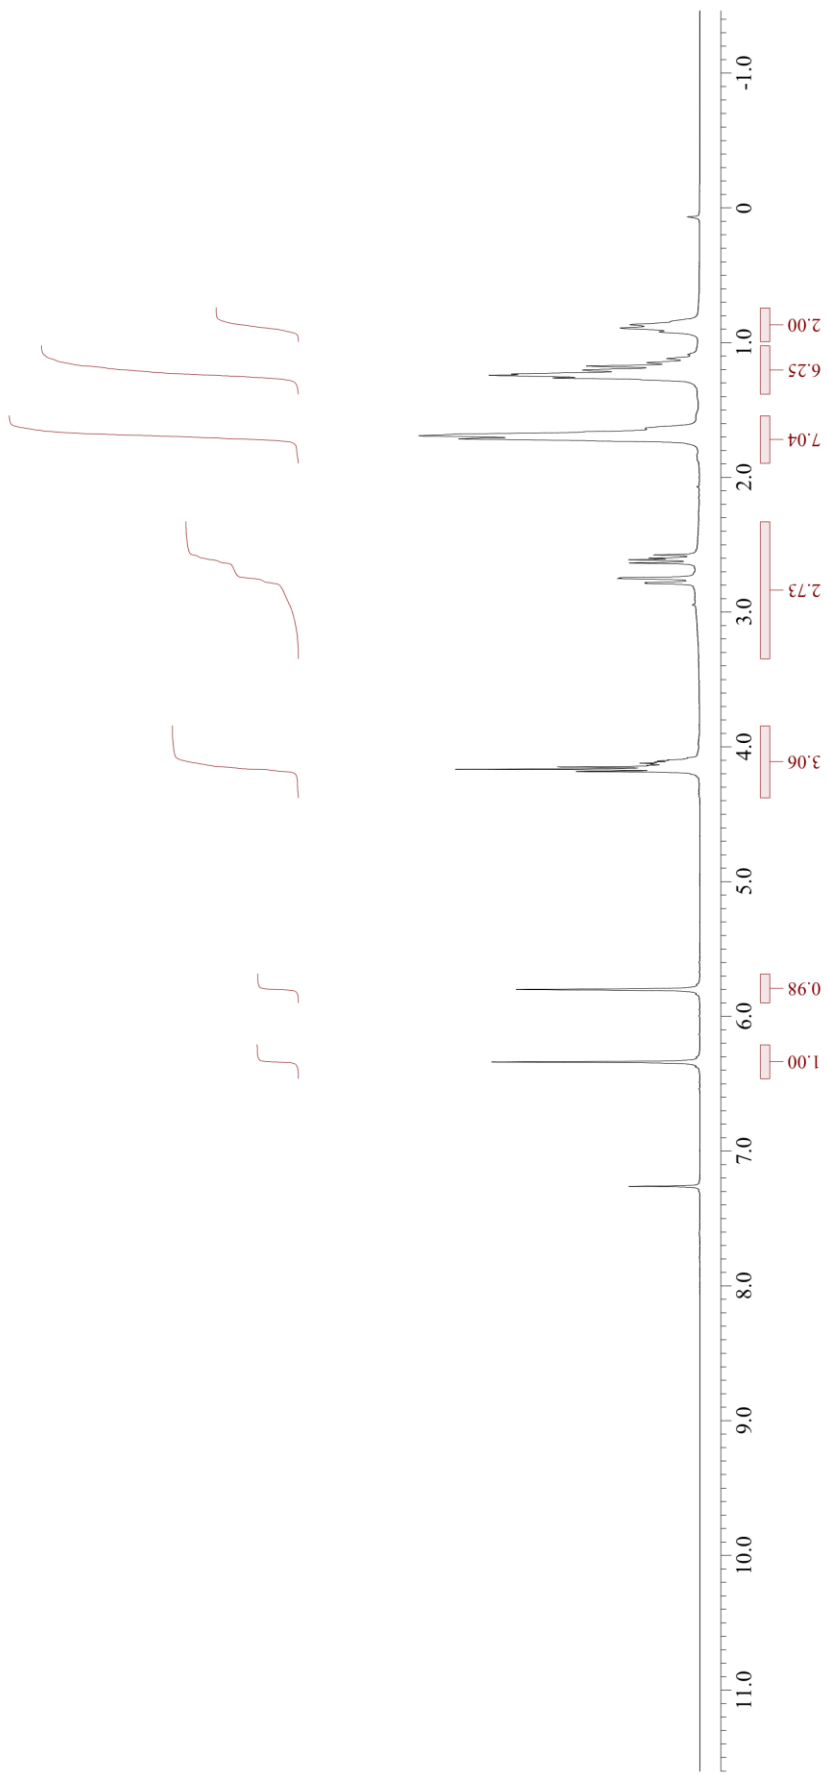

$^{13}\text{C}$  NMR of **9x** ( $\text{CDCl}_3$ , 100 MHz, 25 °C)

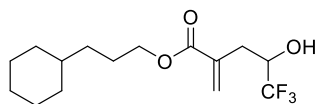

37.411  
33.674  
33.578  
33.386  
26.726  
26.439  
25.998

77.476  
77.160  
76.844  
70.557  
70.251  
69.935  
69.628  
66.293

135.289  
129.769  
129.127  
126.319  
123.512  
120.714

168.177

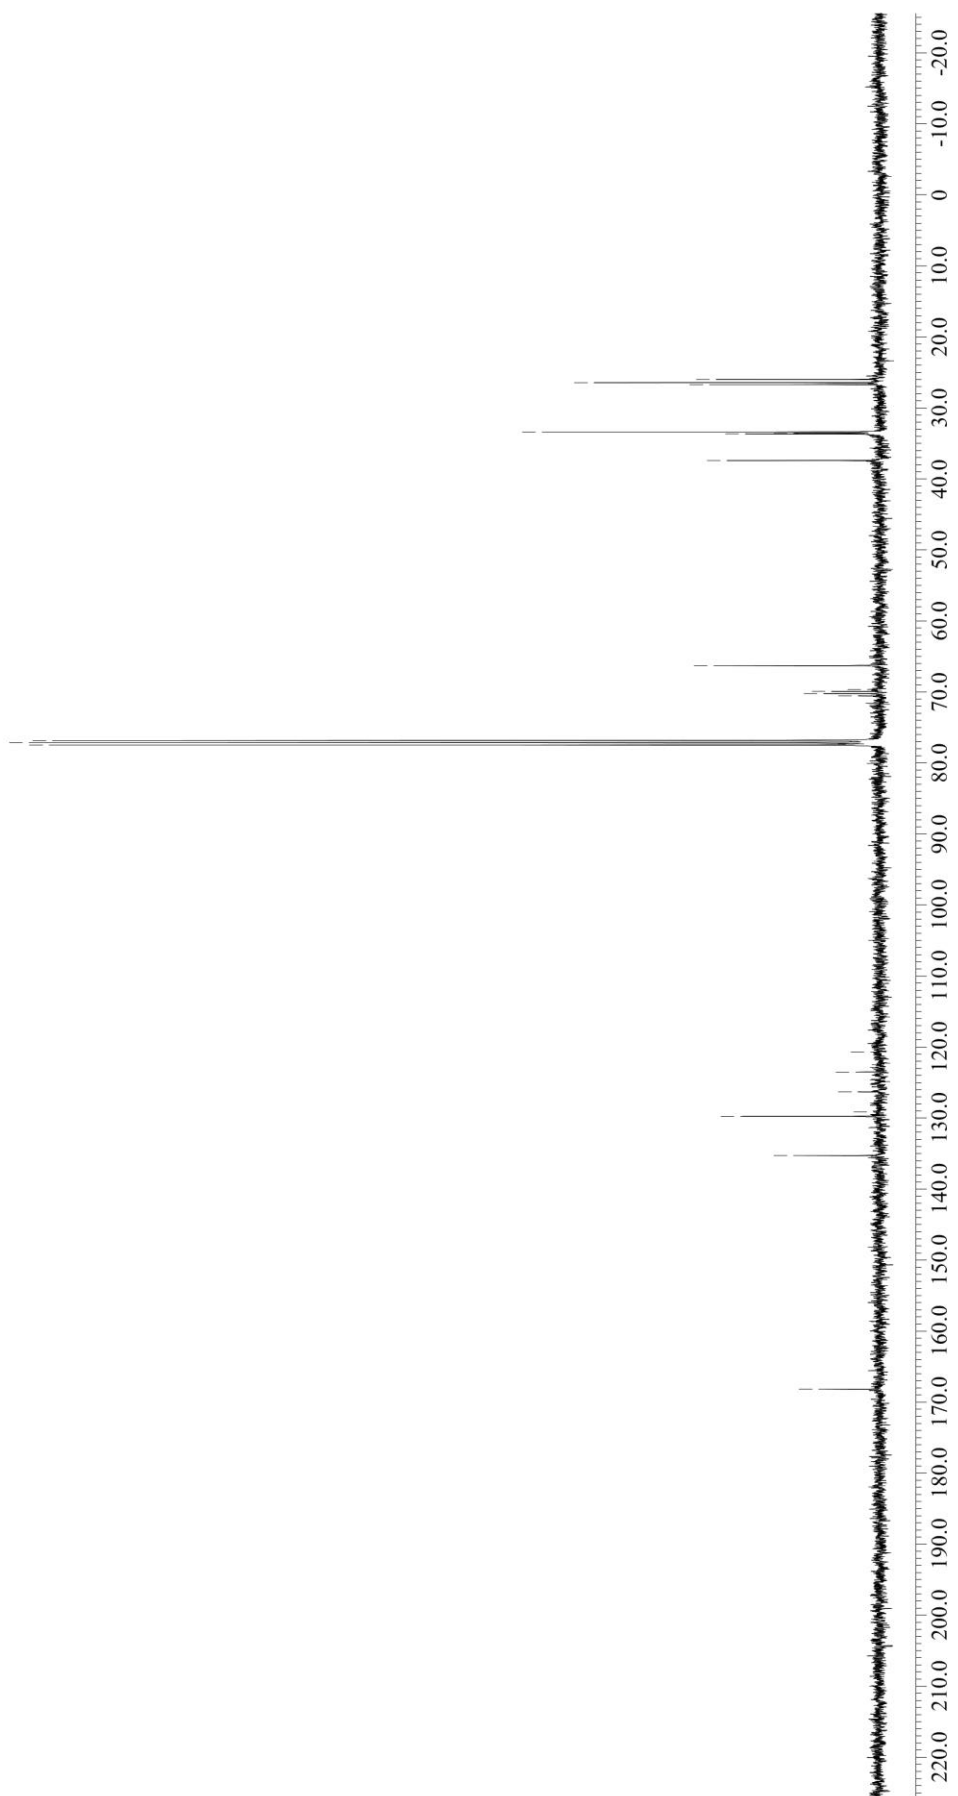



$^{19}\text{F}$  NMR of **9x** ( $\text{CDCl}_3$ , 375 MHz, 25 °C)

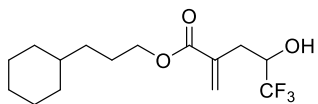

-79.560  
-79.544

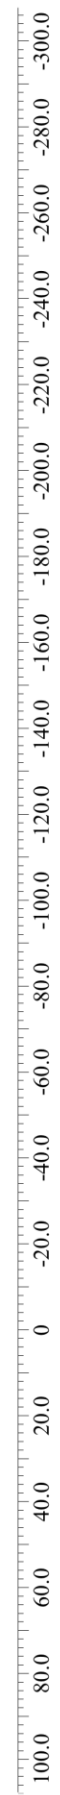

<sup>1</sup>H NMR of **9y** (CDCl<sub>3</sub>, 400 MHz, 25 °C)

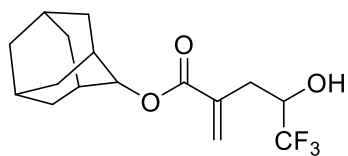

1.599  
1.629  
1.757  
1.808  
1.869  
1.897  
1.995  
2.027  
2.057  
2.635  
2.658  
2.769  
2.774  
2.805  
2.810  
  
3.664  
  
4.116  
4.132  
4.148  
  
5.031  
  
5.811  
  
6.402  
  
7.261

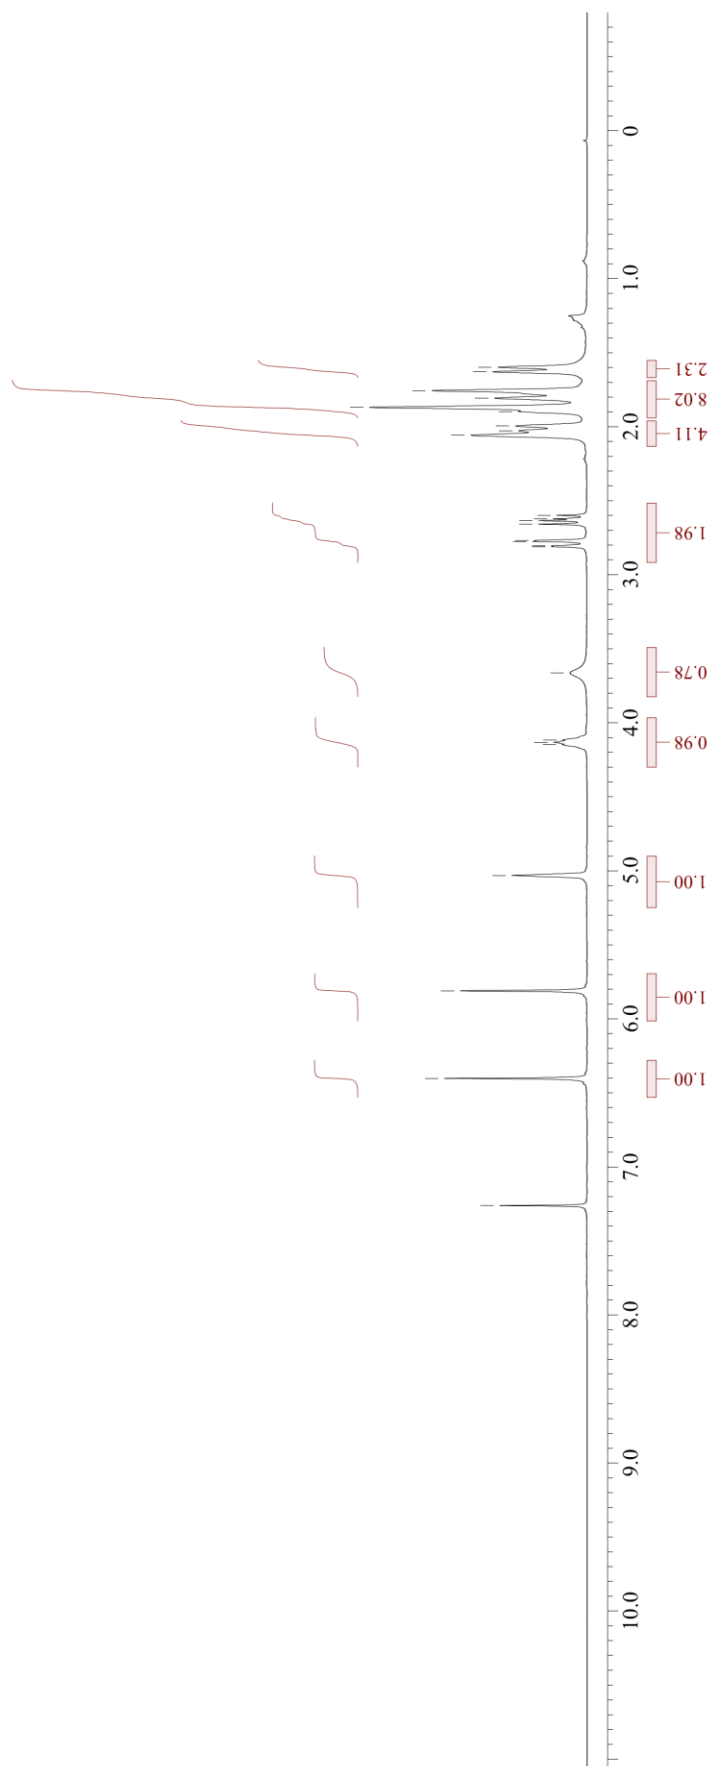

$^{13}\text{C}$  NMR of **9y** ( $\text{CDCl}_3$ , 100 MHz, 25 °C)

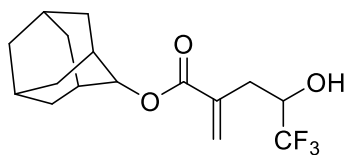

37.420  
36.424  
33.635  
32.083  
32.016  
27.330  
27.052

78.722  
77.476  
77.160  
76.844  
70.663  
70.356  
70.050  
69.743

135.912  
129.463  
129.175  
126.367  
123.560  
120.752

167.468

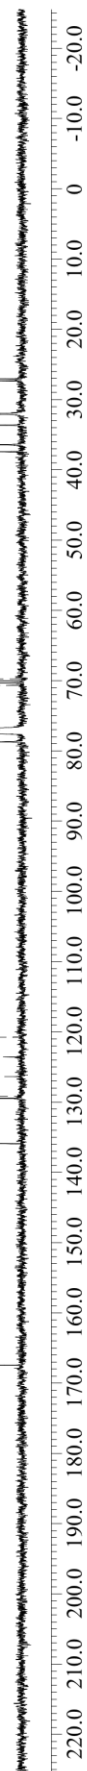

$^{19}\text{F}$  NMR of **9y** ( $\text{CDCl}_3$ , 375 MHz, 25 °C)

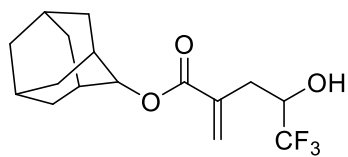

-79.528  
-79.512

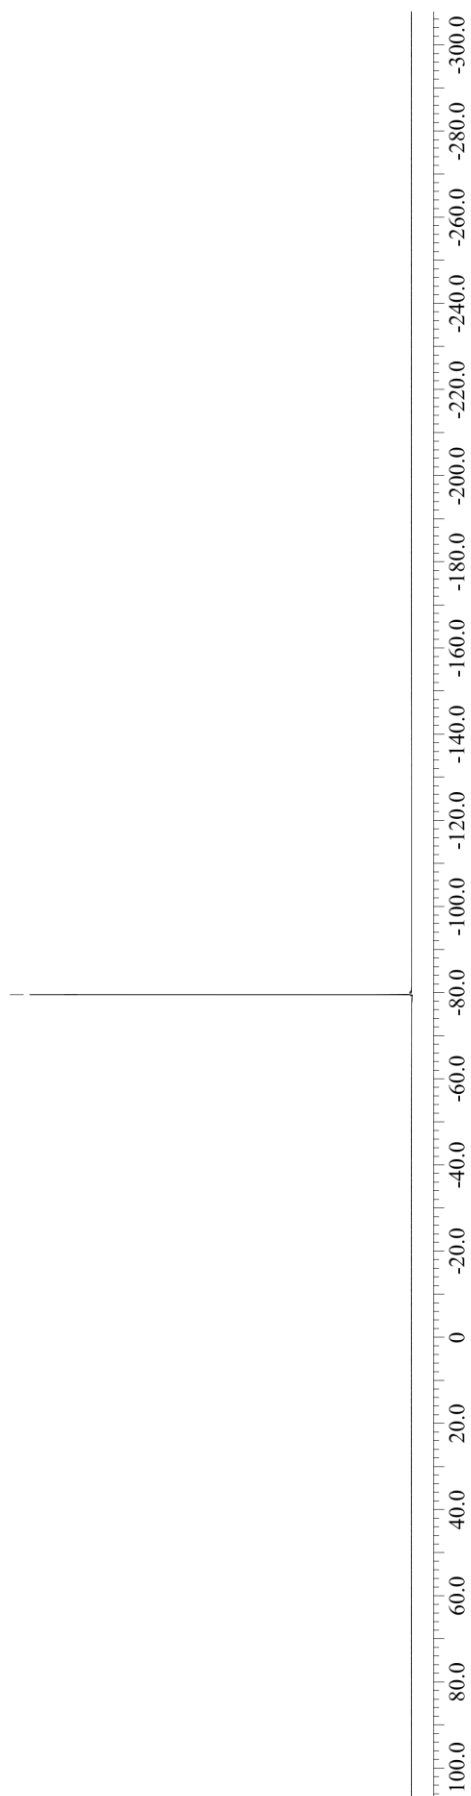

$^1\text{H}$  NMR of **9z** ( $\text{CDCl}_3$ , 400 MHz, 25 °C)

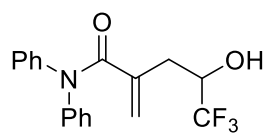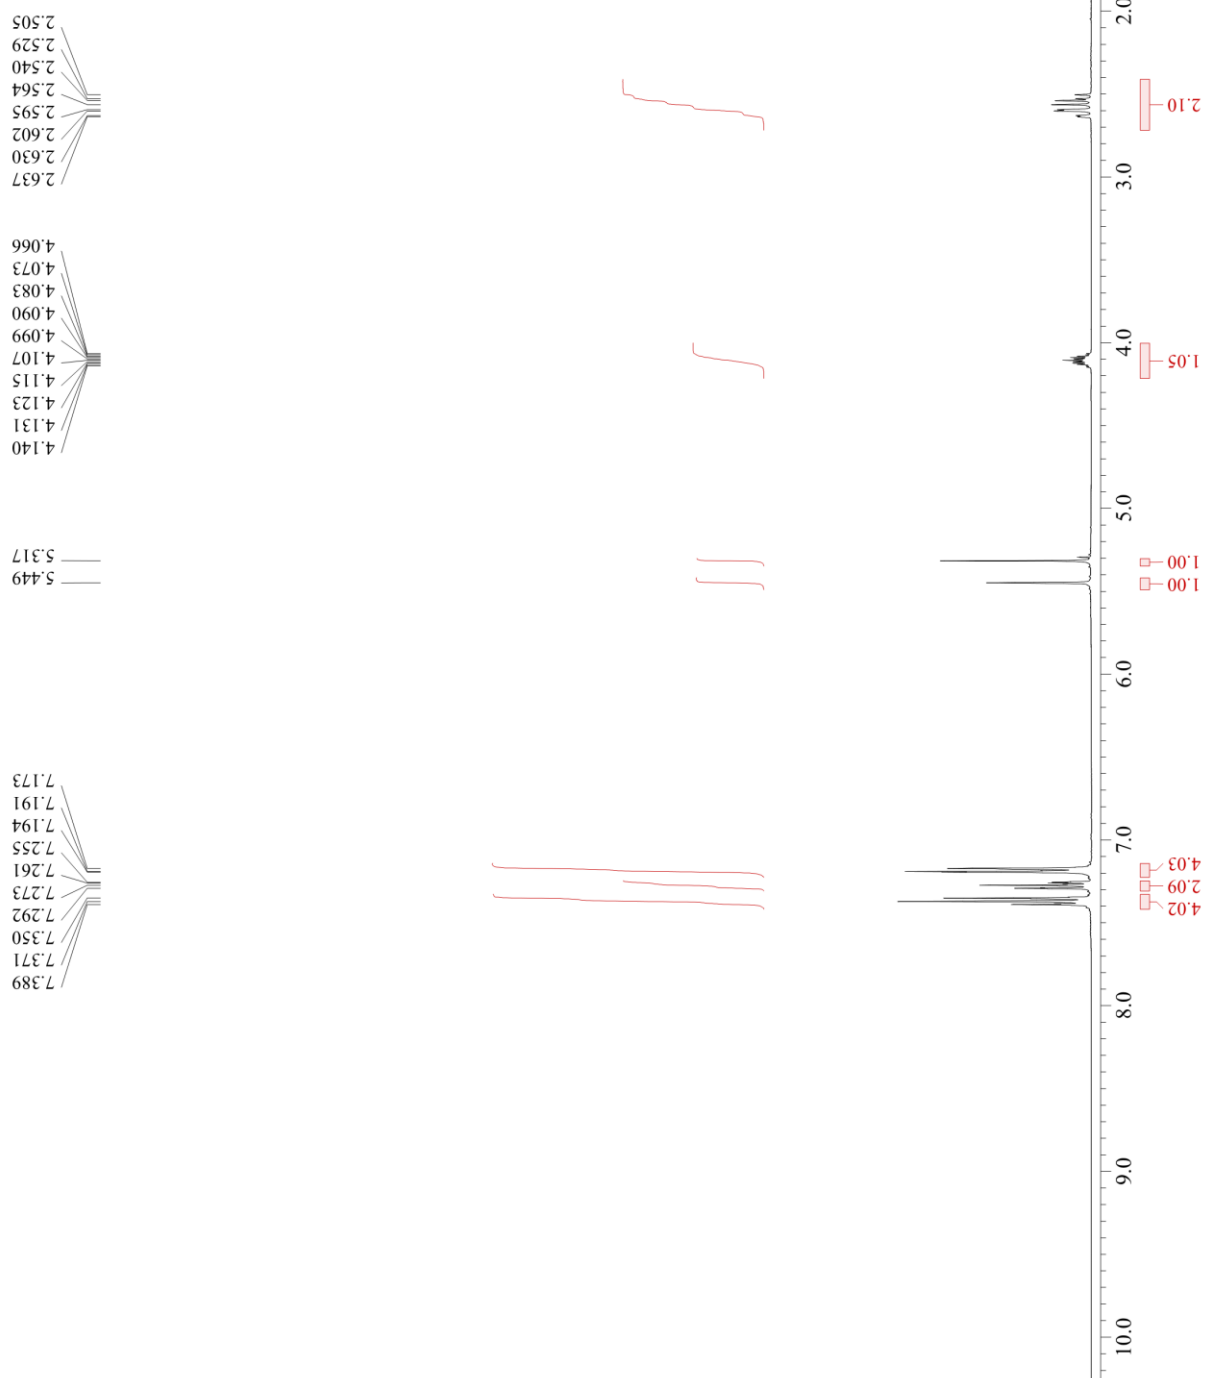

$^{13}\text{C}$  NMR of **9z** ( $\text{CDCl}_3$ , 100 MHz, 25 °C)

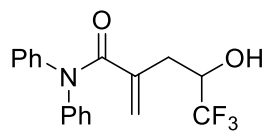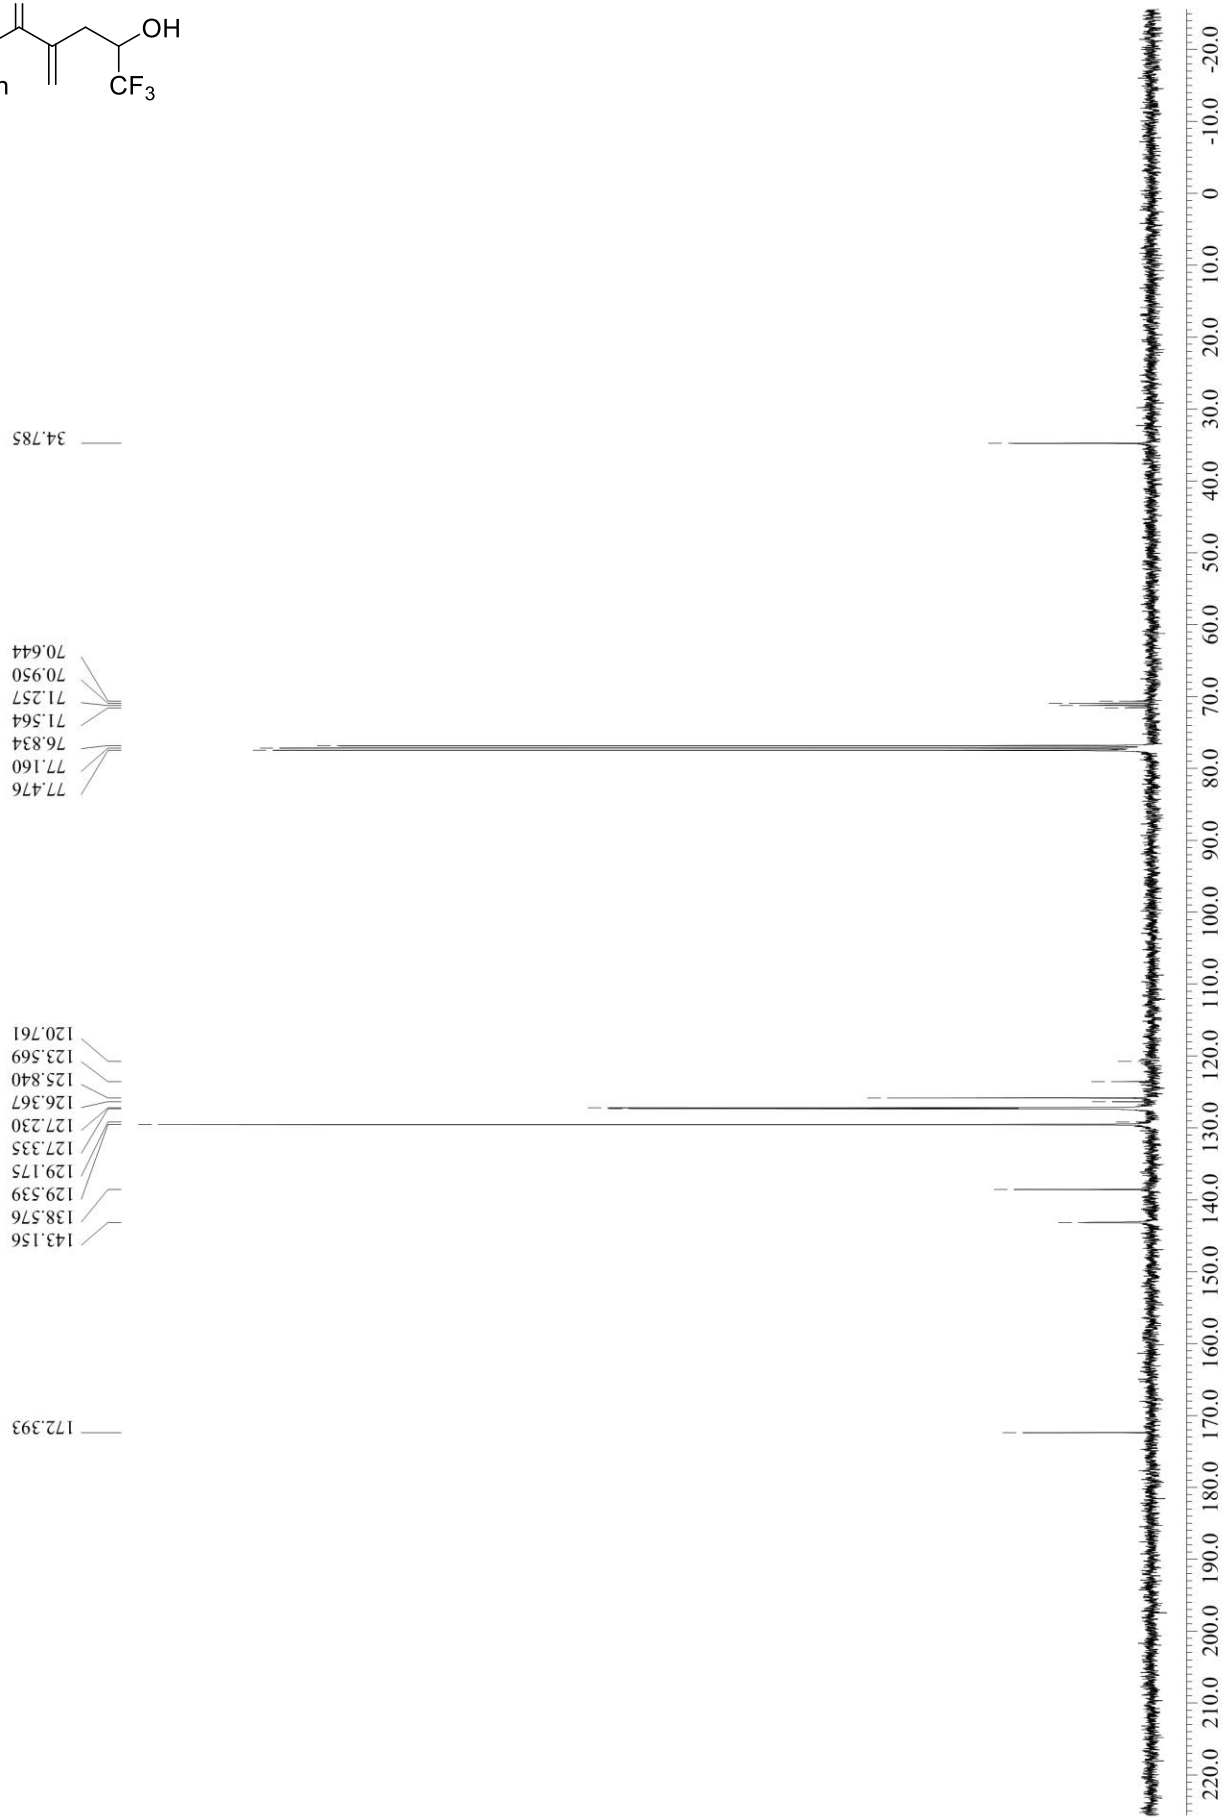

$^{19}\text{F}$  NMR of **9z** ( $\text{CDCl}_3$ , 375 MHz, 25 °C)

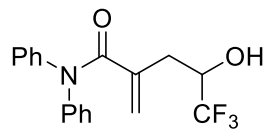

-79.465  
-79.449

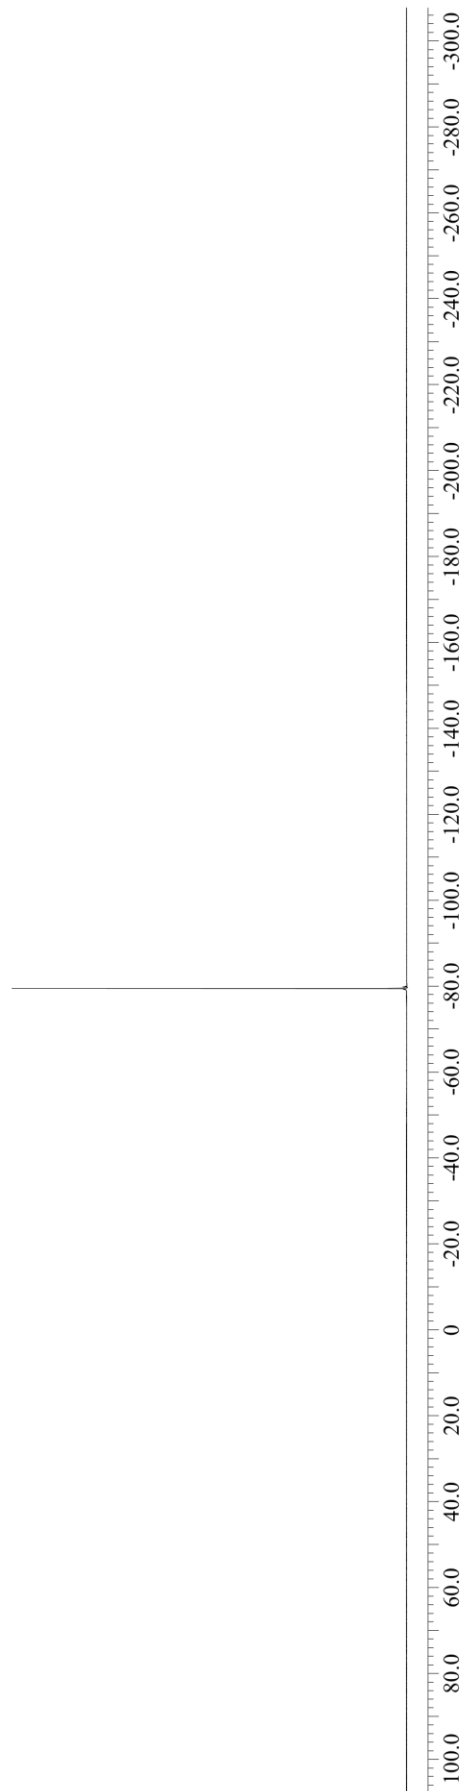

$^1\text{H}$  NMR of **9aa** ( $\text{CDCl}_3$ , 400 MHz, 25  $^\circ\text{C}$ )

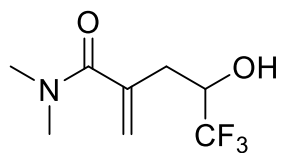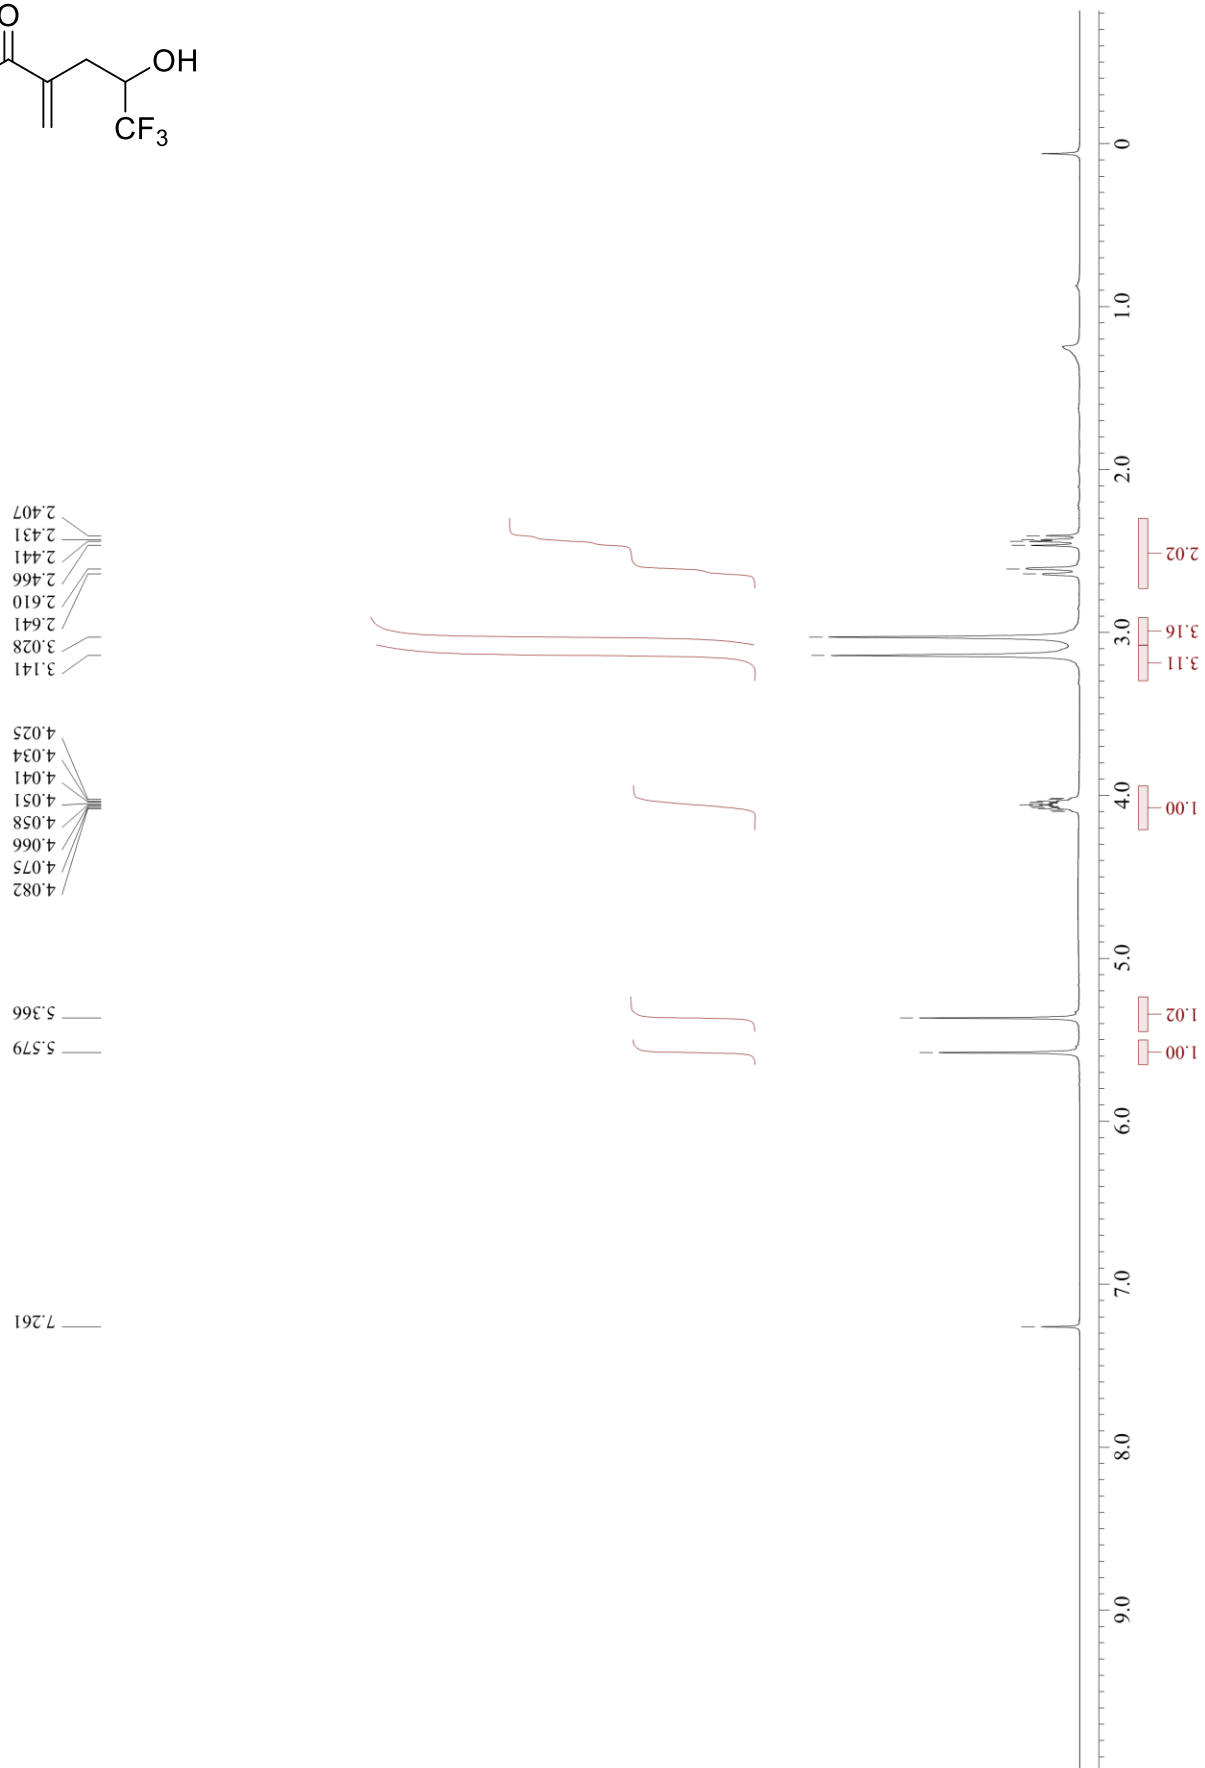



$^{13}\text{C}$  NMR of **9aa** ( $\text{CDCl}_3$ , 100 MHz, 25 °C)

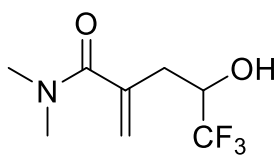

39.787  
35.513  
34.785

77.486  
77.160  
76.844  
71.554  
71.247  
70.941  
70.634

137.637  
129.261  
126.454  
123.655  
121.806  
120.848

172.364

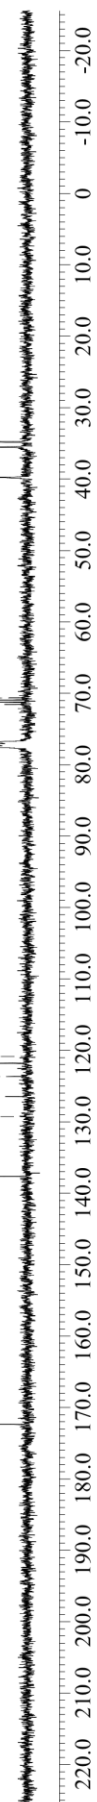

$^{19}\text{F}$  NMR of **9aa** ( $\text{CDCl}_3$ , 375 MHz, 25 °C)

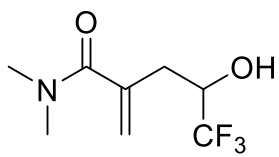

-79.362  
-79.378

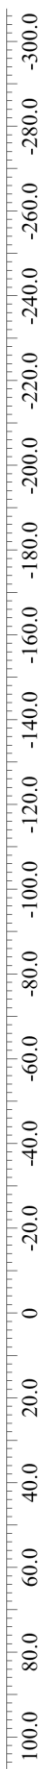

$^1\text{H}$  NMR of **9ab** ( $\text{CDCl}_3$ , 400 MHz, 25  $^\circ\text{C}$ )

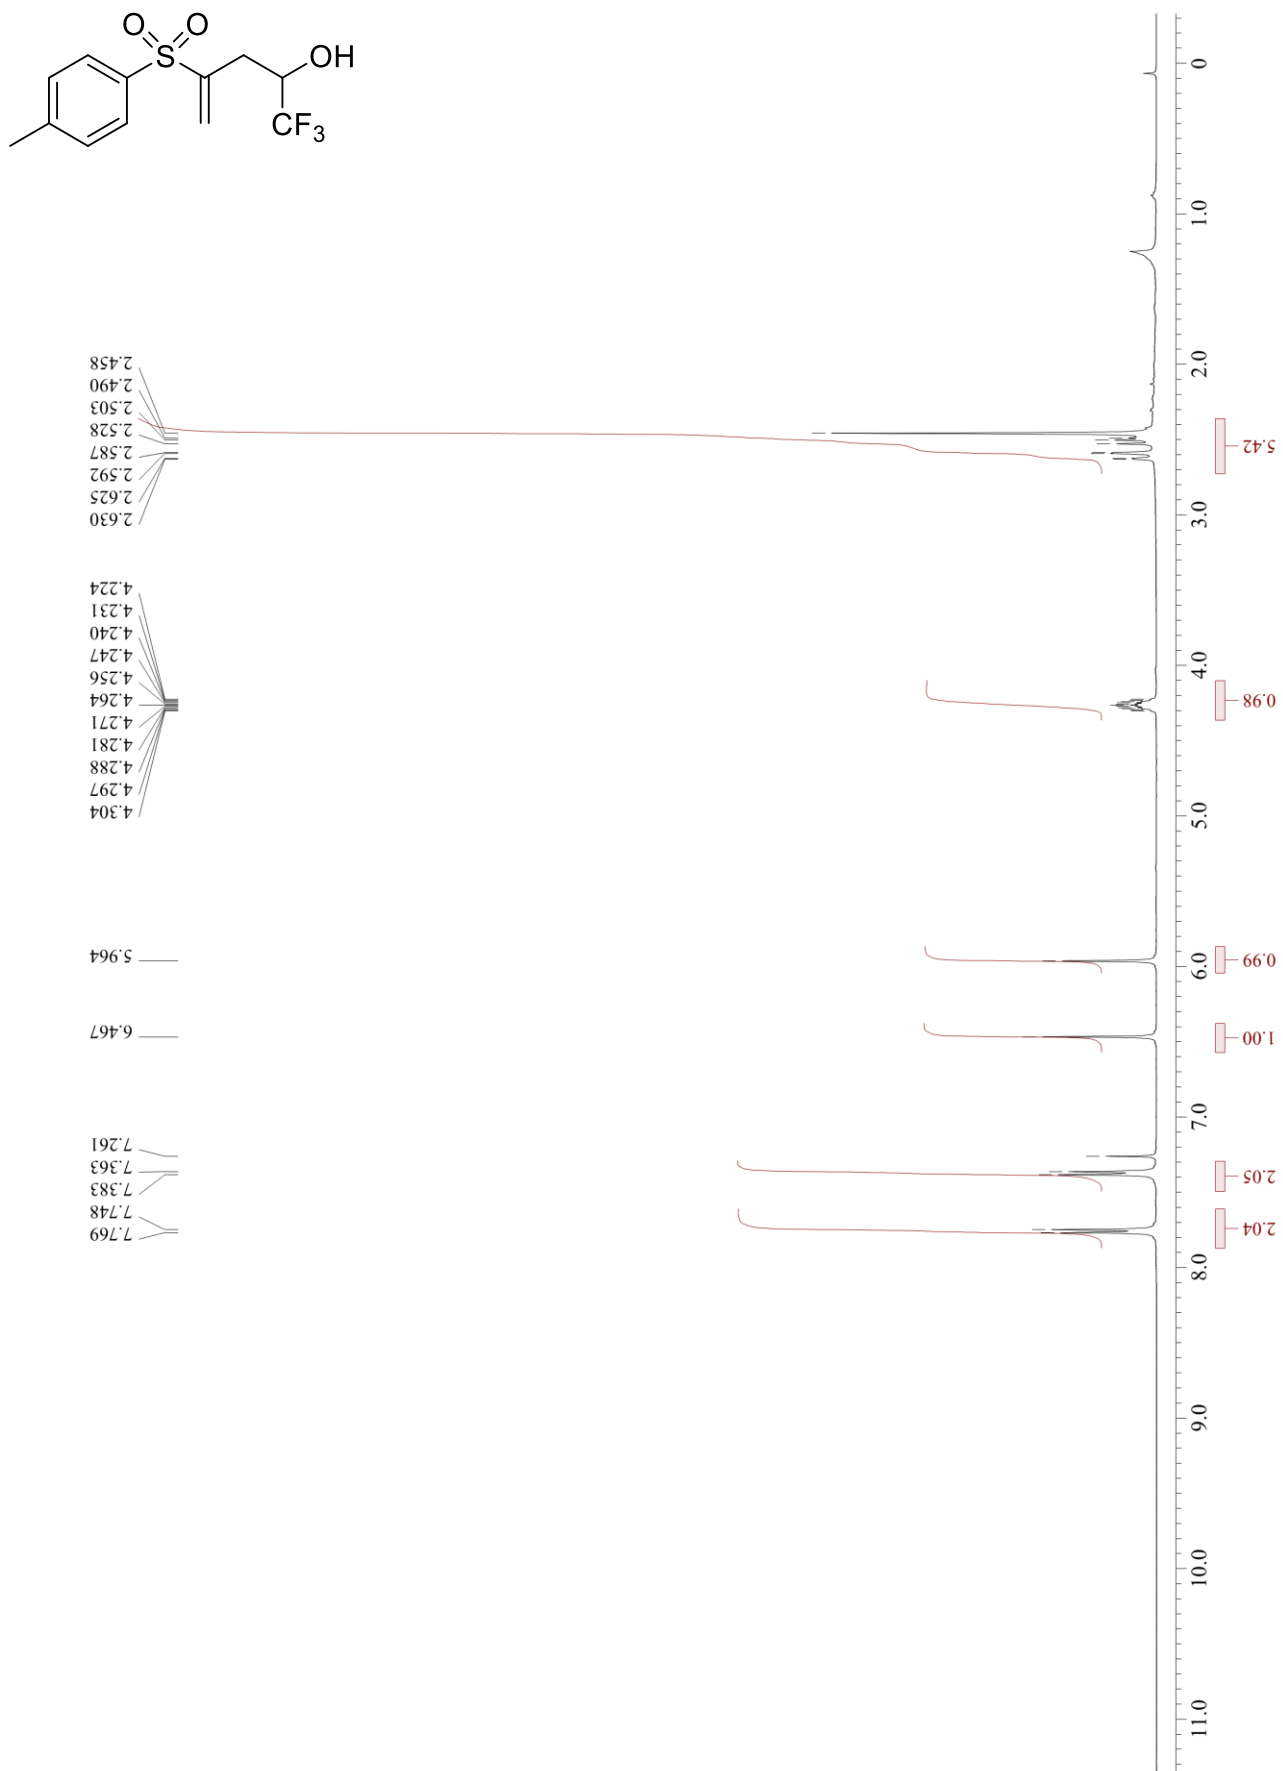

$^{13}\text{C}$  NMR of **9ab** ( $\text{CDCl}_3$ , 100 MHz, 25 °C)

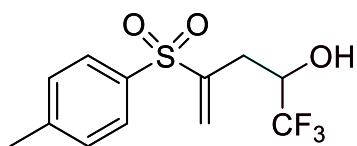

21.820

31.172

68.612

68.928

69.235

69.561

76.834

77.160

77.476

120.464

123.157

125.965

128.293

128.571

128.773

130.315

134.714

144.967

145.466

220.0 210.0 200.0 190.0 180.0 170.0 160.0 150.0 140.0 130.0 120.0 110.0 100.0 90.0 80.0 70.0 60.0 50.0 40.0 30.0 20.0 10.0 0 -10.0 -20.0

$^{19}\text{F}$  NMR of **9ab** ( $\text{CDCl}_3$ , 375 MHz, 25 °C)

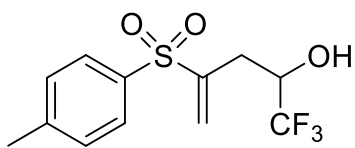

-79.695  
-79.679

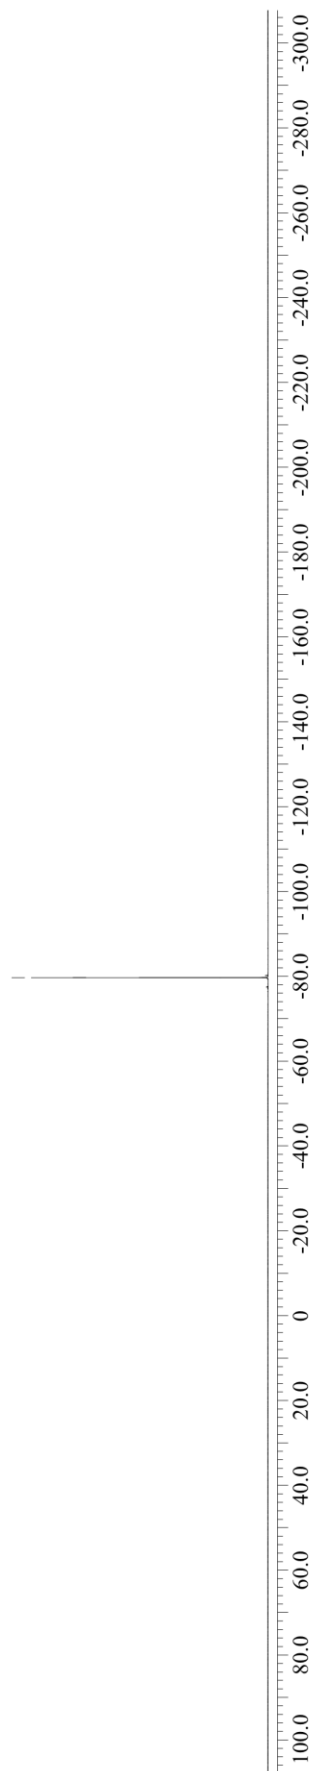

$^1\text{H}$  NMR of **9ac** ( $\text{CDCl}_3$ , 400 MHz, 25 °C)

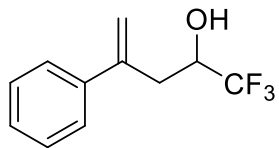

7.423  
7.404  
7.378  
7.359  
7.346  
7.329  
7.312  
7.261  
4.005  
3.998  
3.106  
3.070  
2.735  
2.709  
2.699  
2.673  
2.207  
5.490  
5.278

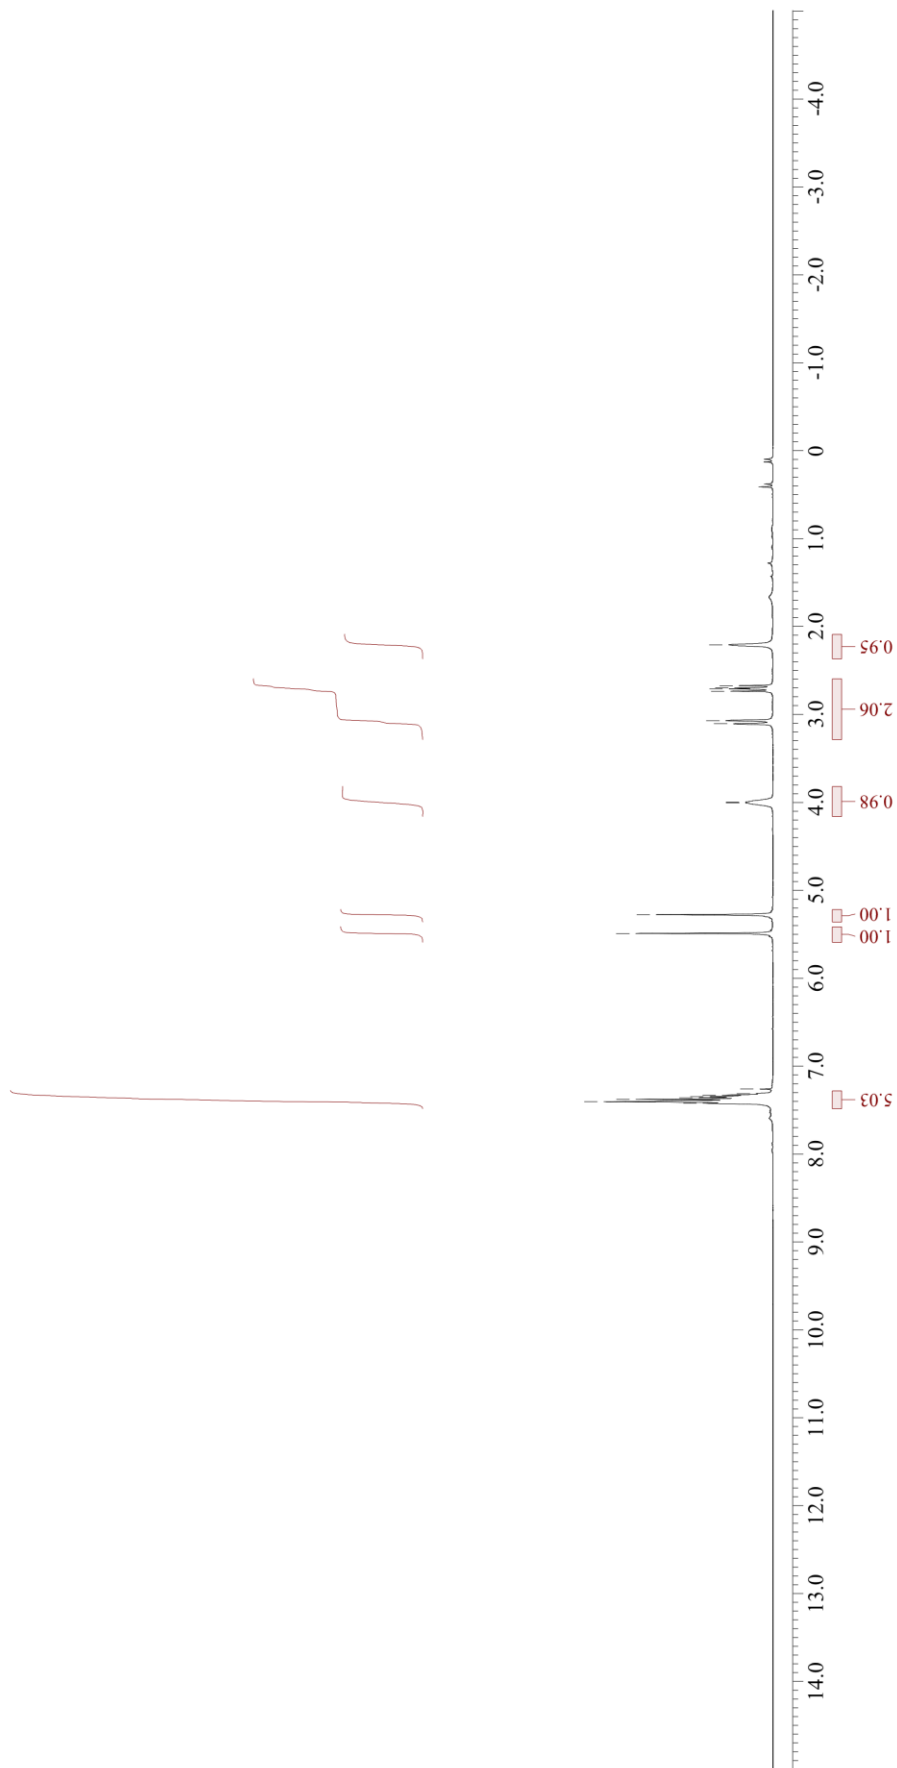

$^{13}\text{C}$  NMR of **9ac** ( $\text{CDCl}_3$ , 100 MHz, 25 °C)

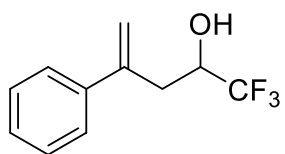

36.299

68.191  
68.497  
68.804  
69.120  
76.844  
77.160  
77.486

117.005  
121.145  
123.694  
126.329  
126.492  
128.293  
128.840  
129.290  
139.390  
142.668

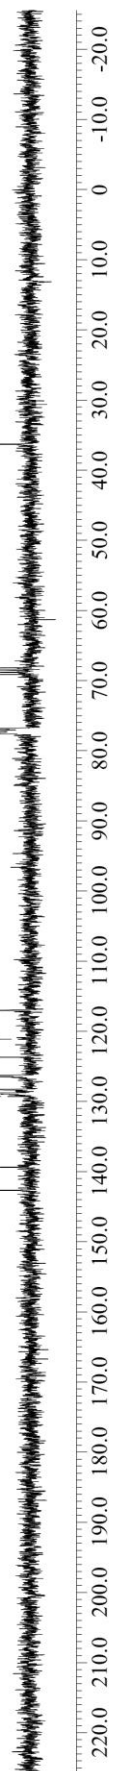

$^{19}\text{F}$  NMR of **9ac** ( $\text{CDCl}_3$ , 375 MHz, 25 °C)

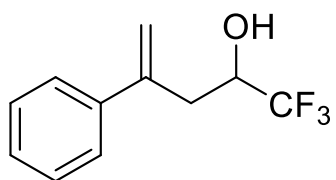

-79.512  
-79.496

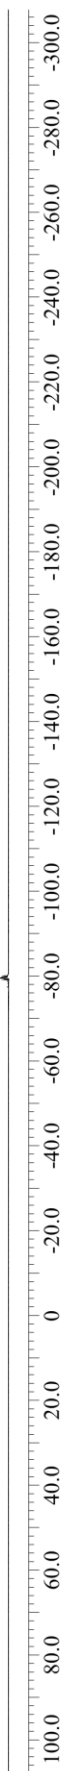



$^1\text{H}$  NMR of **9ad** ( $\text{CDCl}_3$ , 400 MHz, 25  $^\circ\text{C}$ )

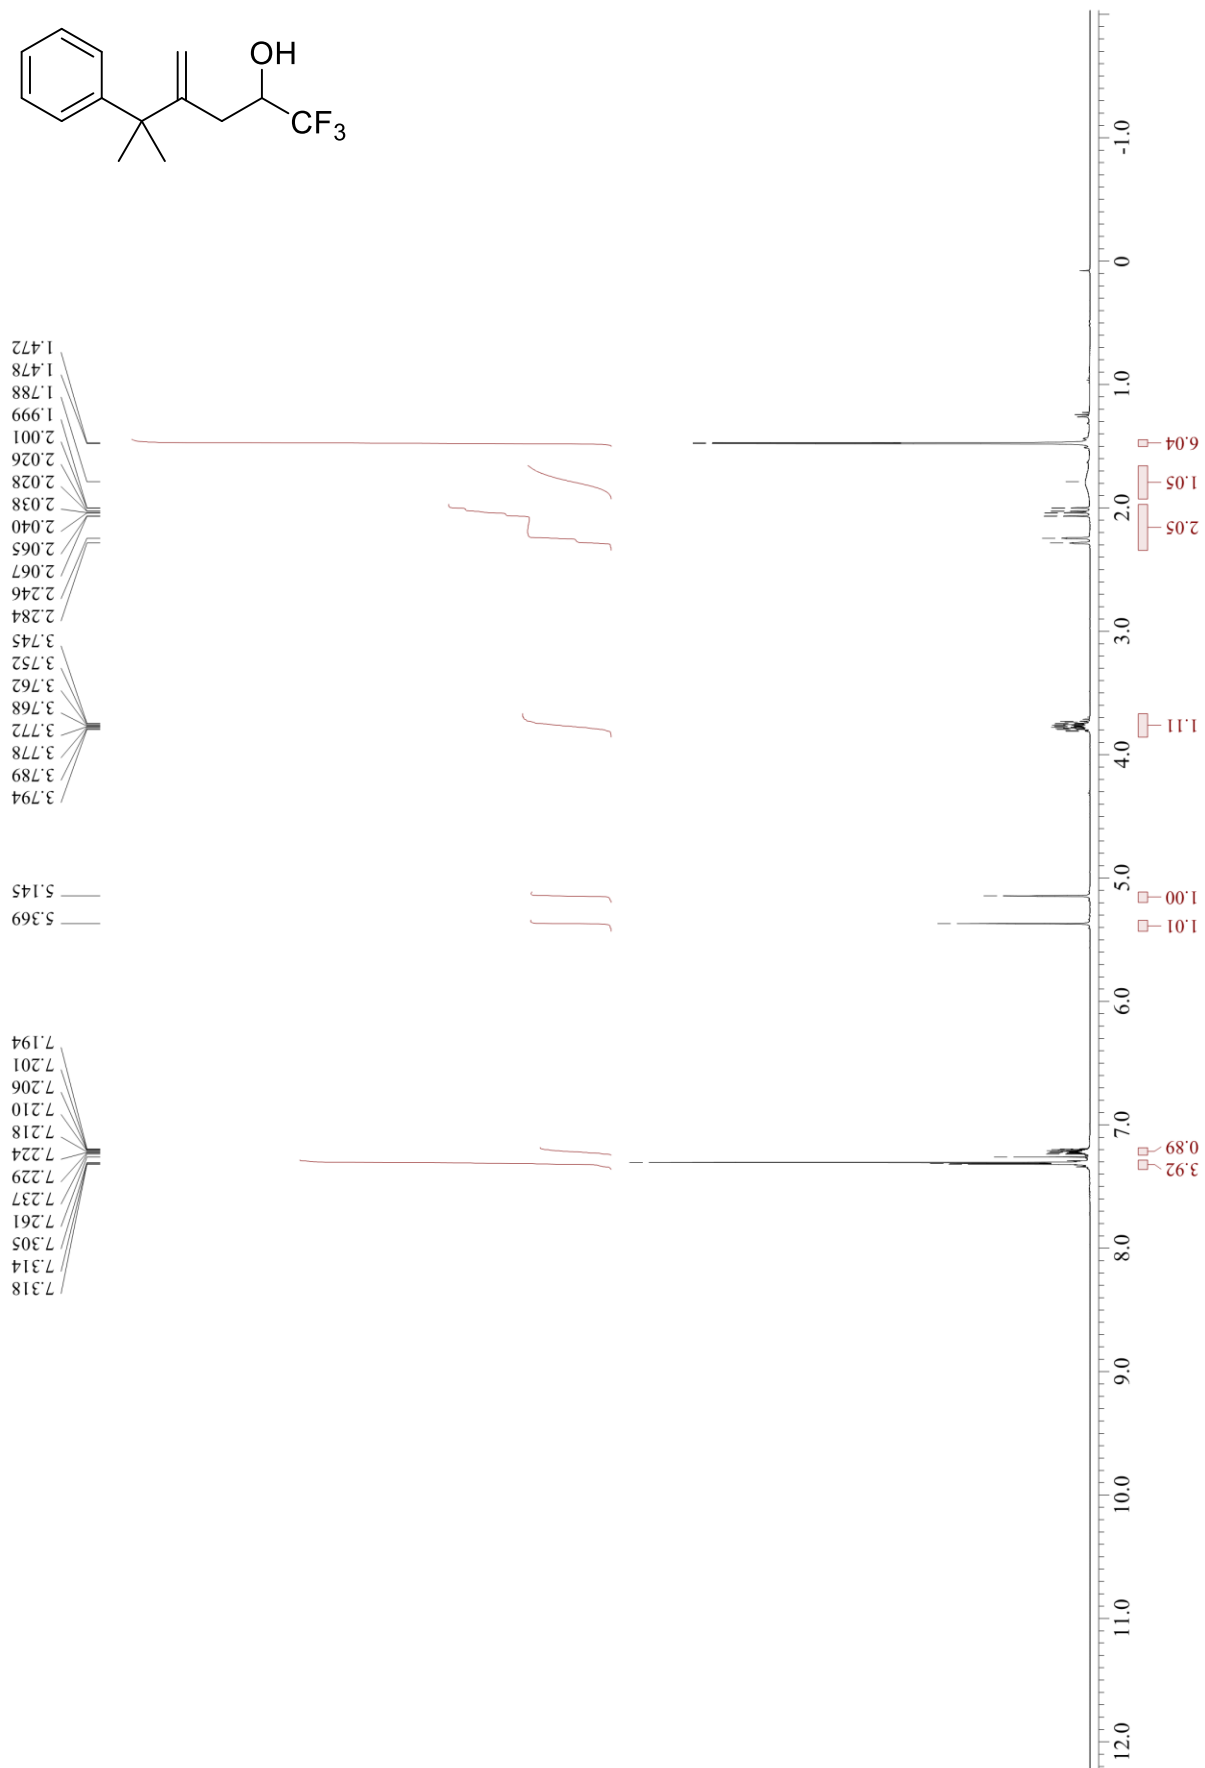

$^{13}\text{C}$  NMR of **9ad** ( $\text{CDCl}_3$ , 100 MHz, 25 °C)

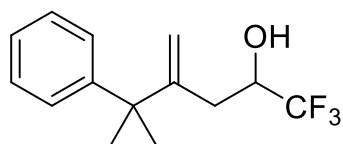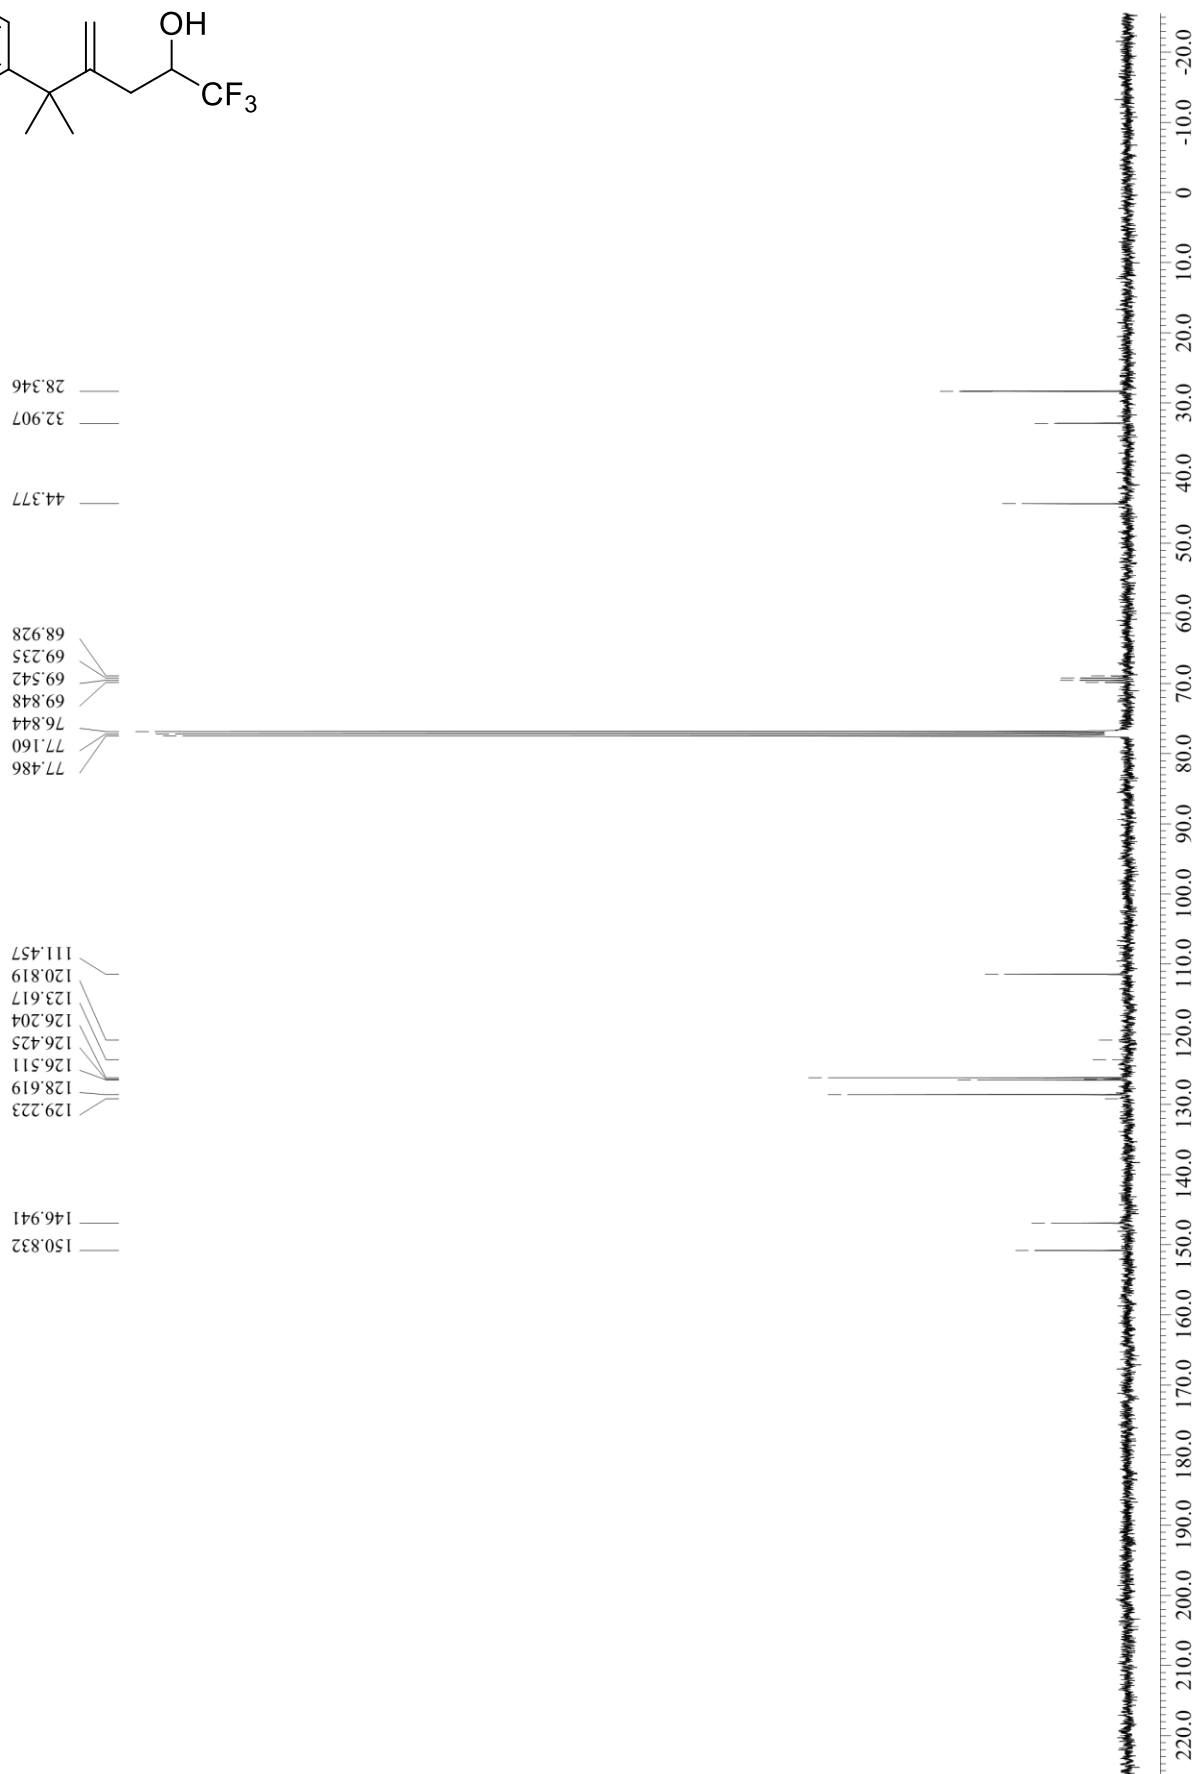

$^{19}\text{F}$  NMR of **9ad** ( $\text{CDCl}_3$ , 375 MHz, 25 °C)

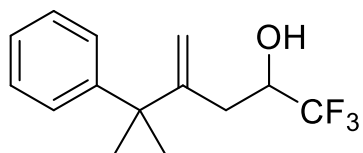

-79.948  
-79.964

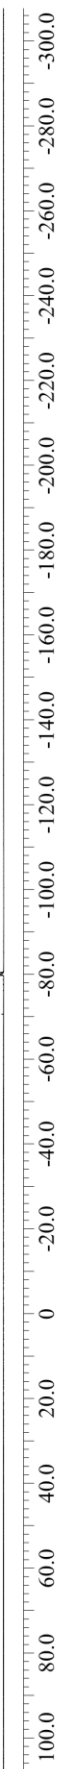

$^1\text{H}$  NMR of **9ae** ( $\text{CDCl}_3$ , 400 MHz, 25  $^\circ\text{C}$ )

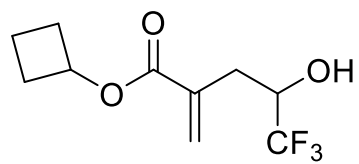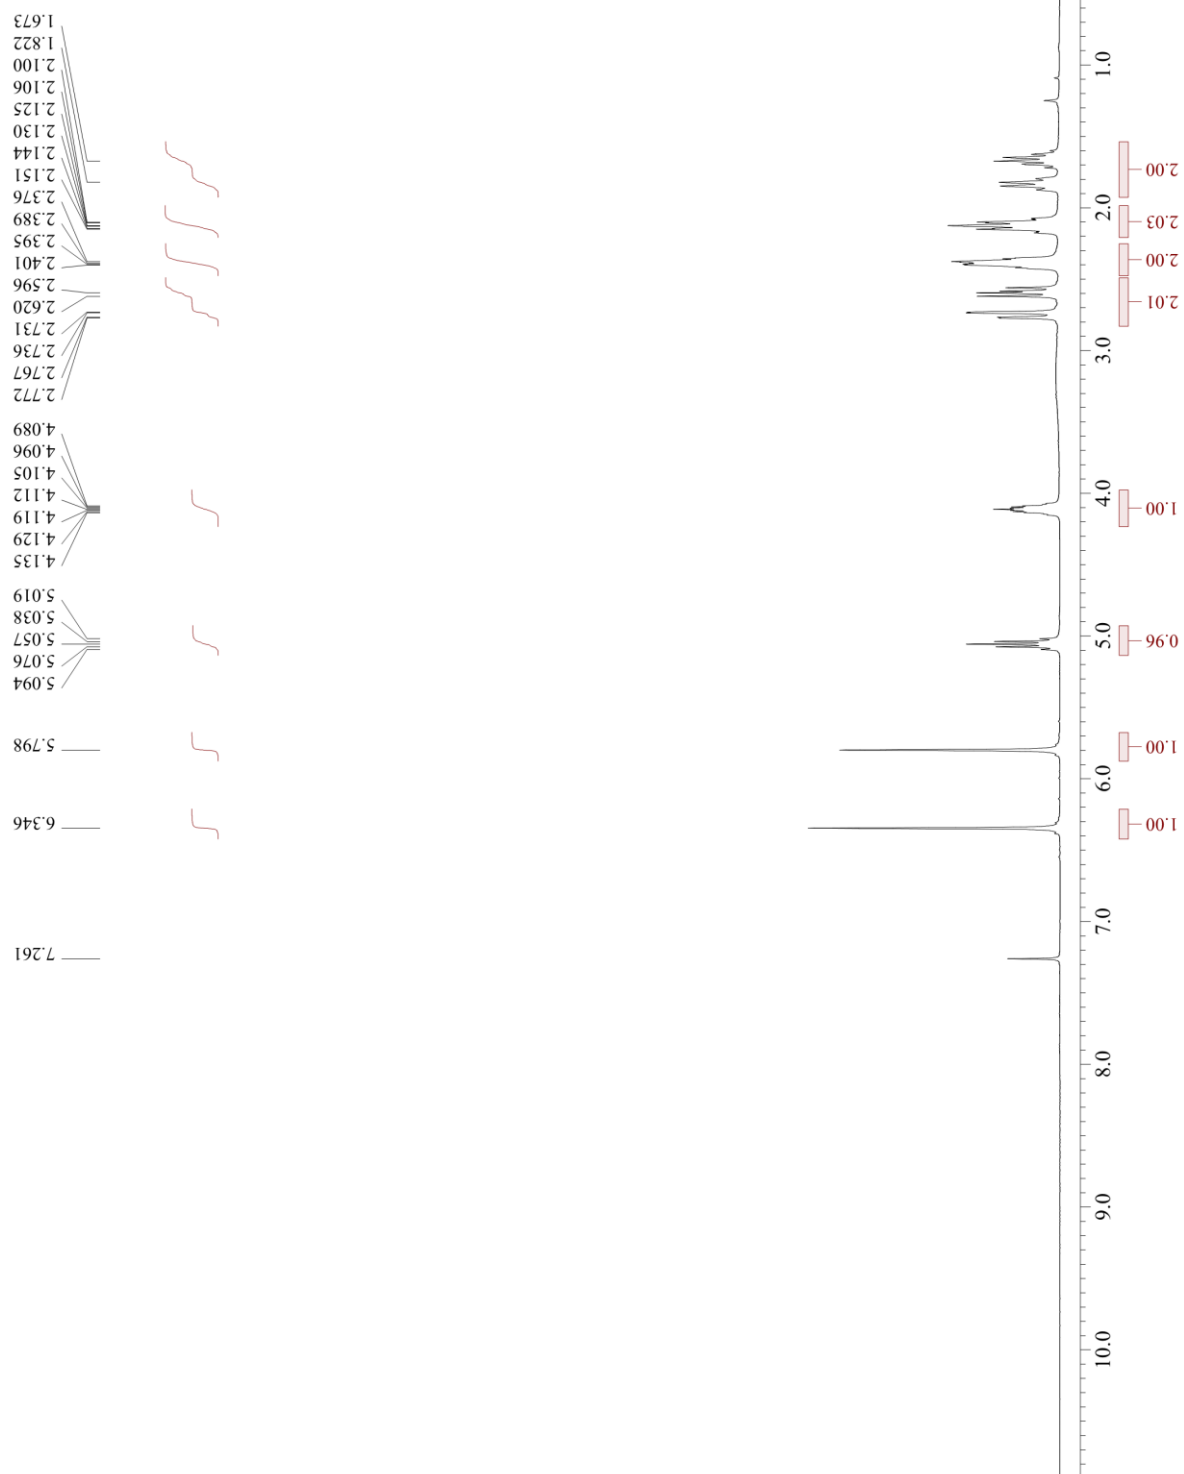

$^{13}\text{C}$  NMR of **9ae** ( $\text{CDCl}_3$ , 100 MHz, 25 °C)

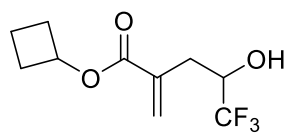

13.617

30.339  
33.482

69.580  
69.896  
70.050  
70.203  
70.510  
76.834  
77.160  
77.476

120.675  
123.512  
126.319  
129.127  
129.817  
135.366

167.487

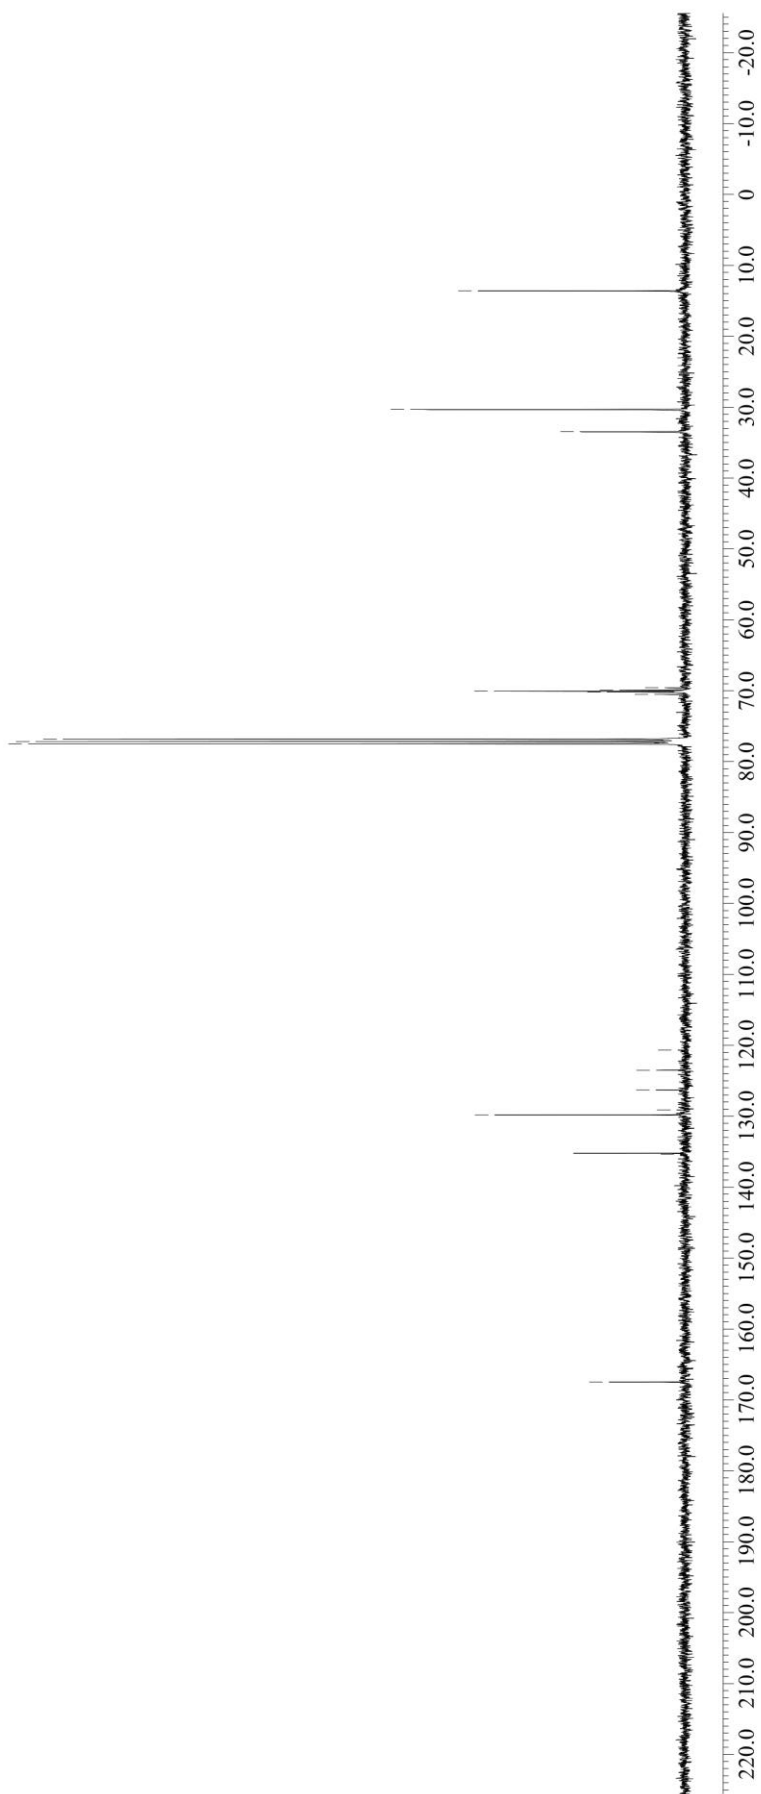

$^{19}\text{F}$  NMR of **9ae** ( $\text{CDCl}_3$ , 375 MHz, 25 °C)

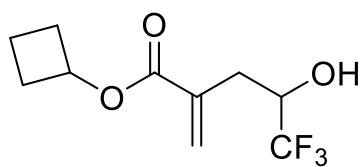

-79.584  
-79.568

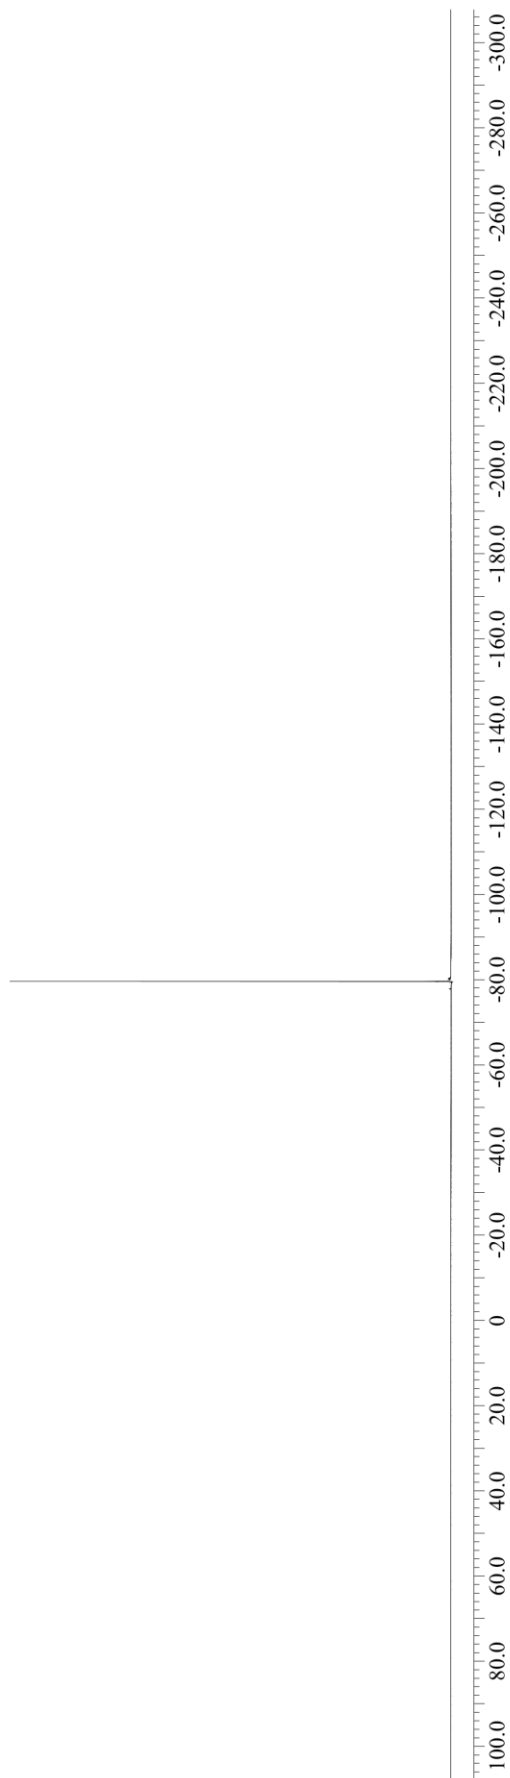

$^1\text{H}$  NMR of **9af** ( $\text{CDCl}_3$ , 400 MHz, 25  $^\circ\text{C}$ )

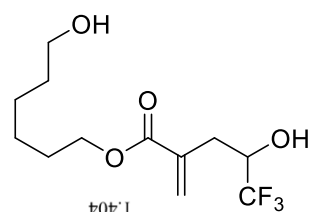

1.404  
1.412  
1.420  
1.559  
1.575  
1.590  
1.696  
1.712  
1.729  
1.729  
2.560  
2.584  
2.596  
2.620  
2.744  
2.749  
2.780  
2.785  
3.629  
3.645  
3.661  
4.121  
4.129  
4.136  
4.145  
4.152  
4.185  
4.201  
4.217

5.791  
6.332  
7.261

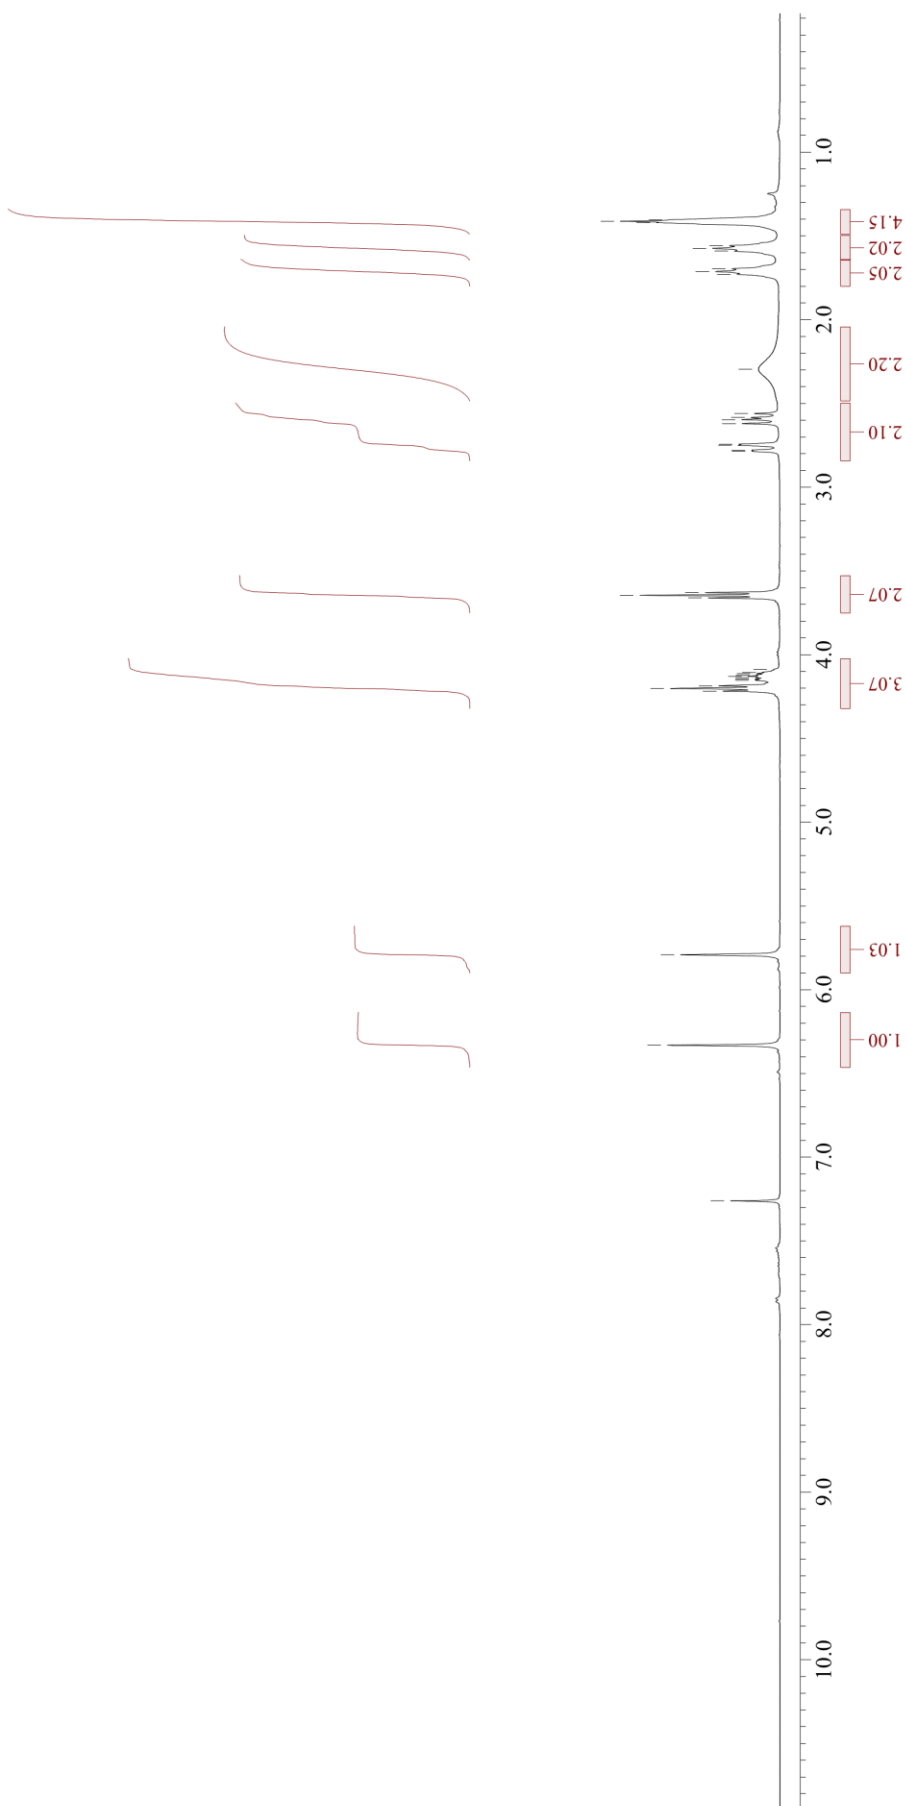

$^{13}\text{C}$  NMR of **9af** ( $\text{CDCl}_3$ , 100 MHz, 25 °C)

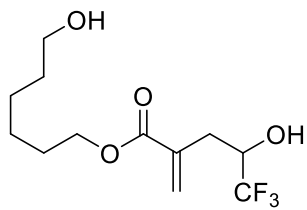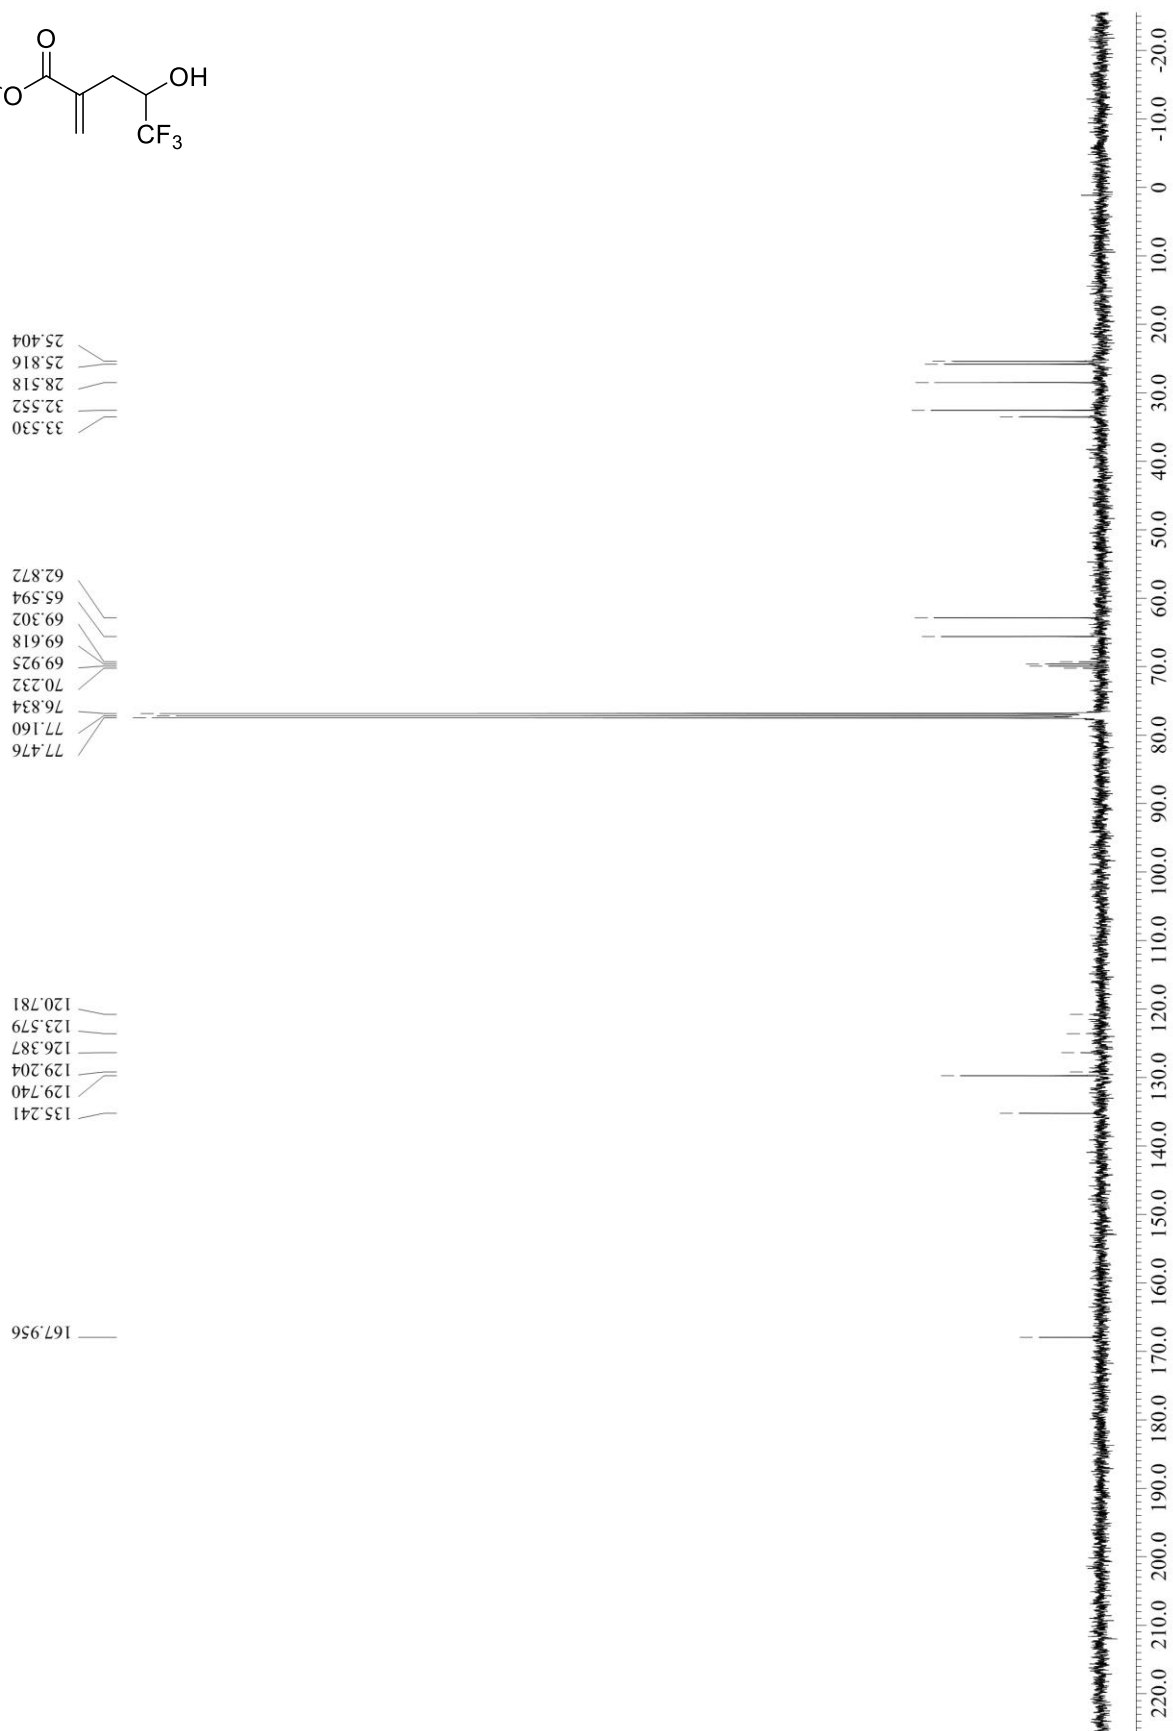



$^{19}\text{F}$  NMR of **9af** ( $\text{CDCl}_3$ , 375 MHz, 25 °C)

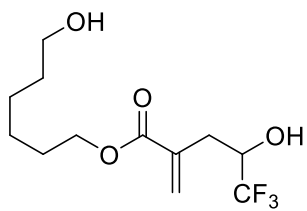

-79.520  
-79.536

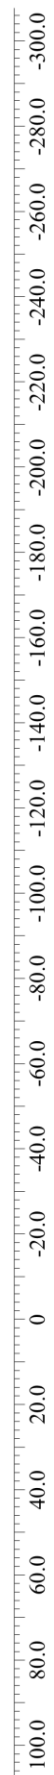

$^1\text{H}$  NMR of **9ag** ( $\text{CDCl}_3$ , 400 MHz, 25 °C)

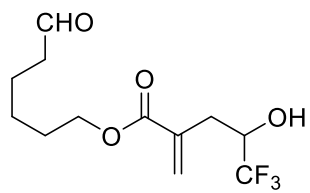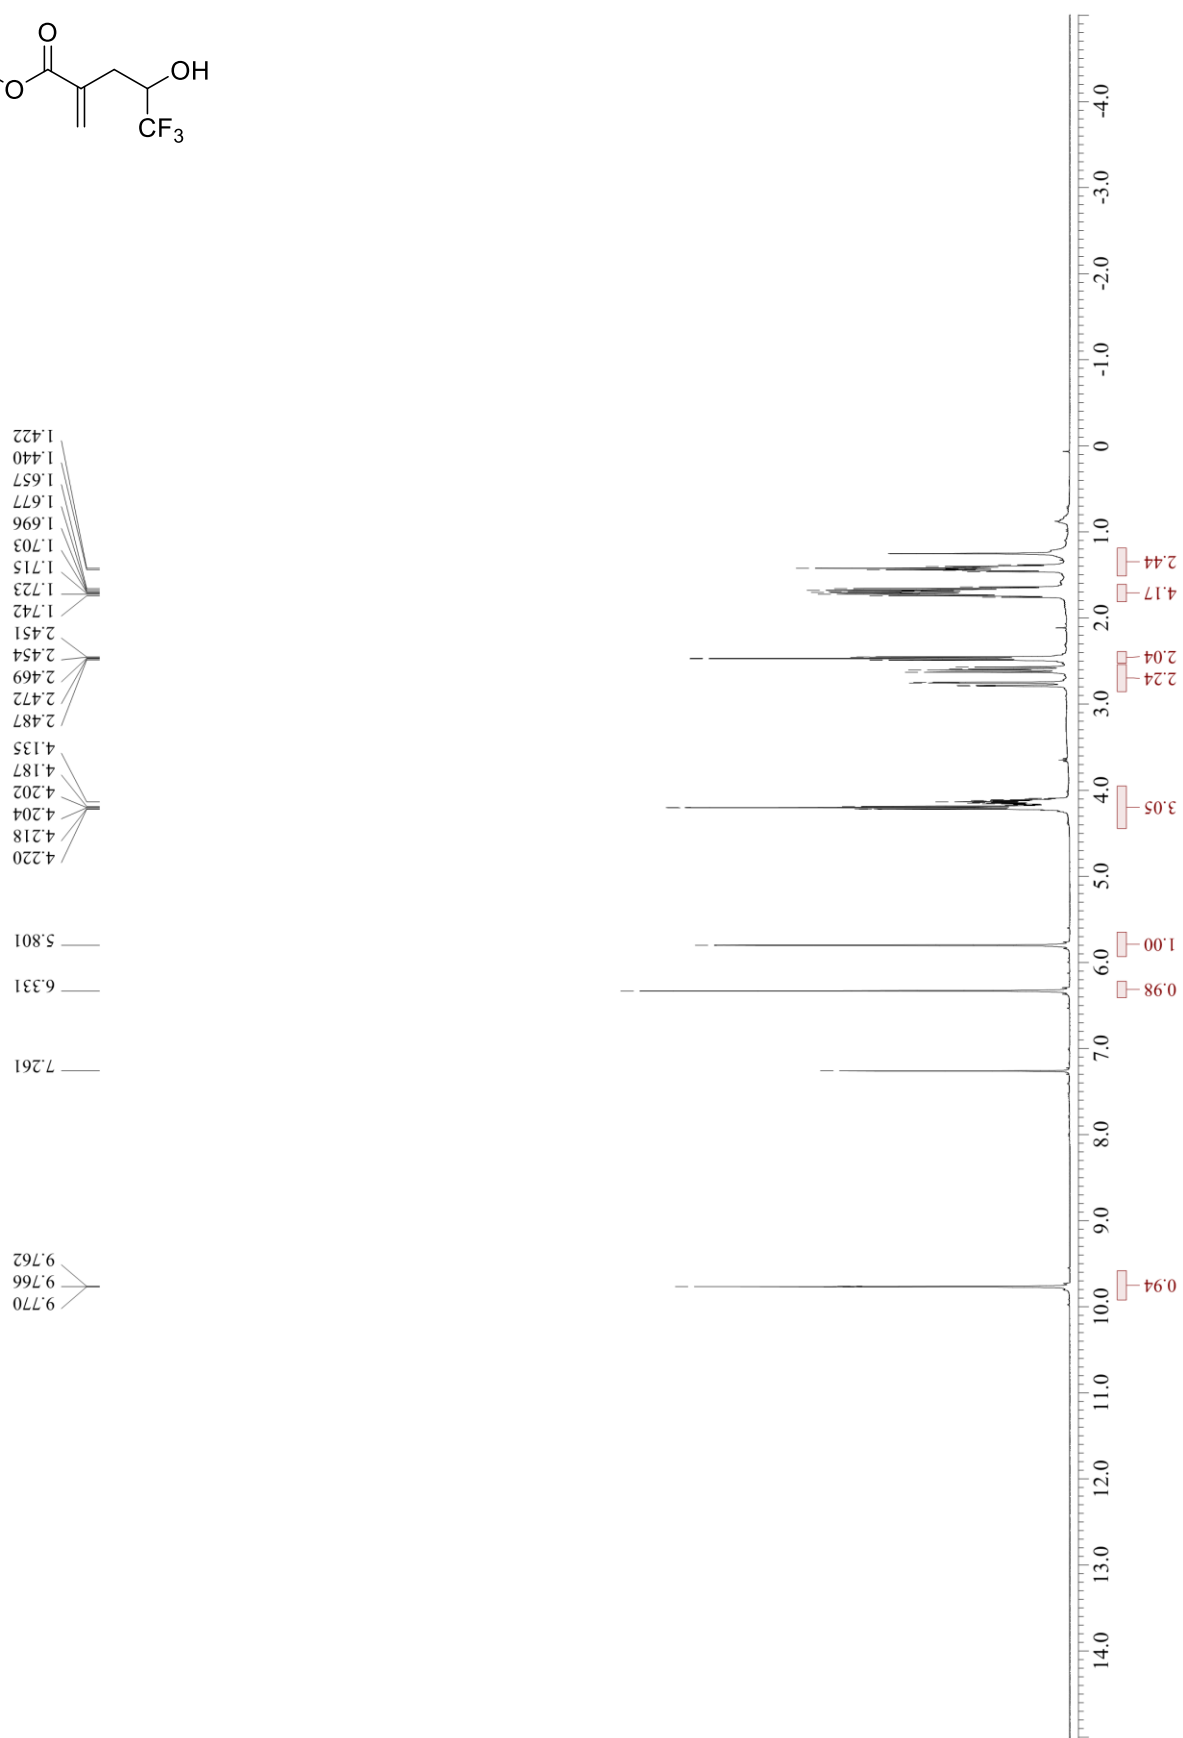

$^{13}\text{C}$  NMR of **9ag** ( $\text{CDCl}_3$ , 100 MHz, 25 °C)

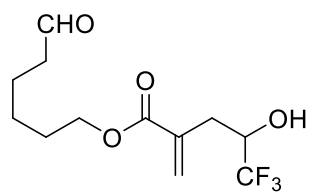

21.676  
25.624  
28.432  
33.539  
43.793  
65.306  
69.465  
69.772  
70.078  
70.385  
76.844  
77.160  
77.476

120.752  
123.550  
126.358  
129.185  
129.788  
135.203

167.918

202.541

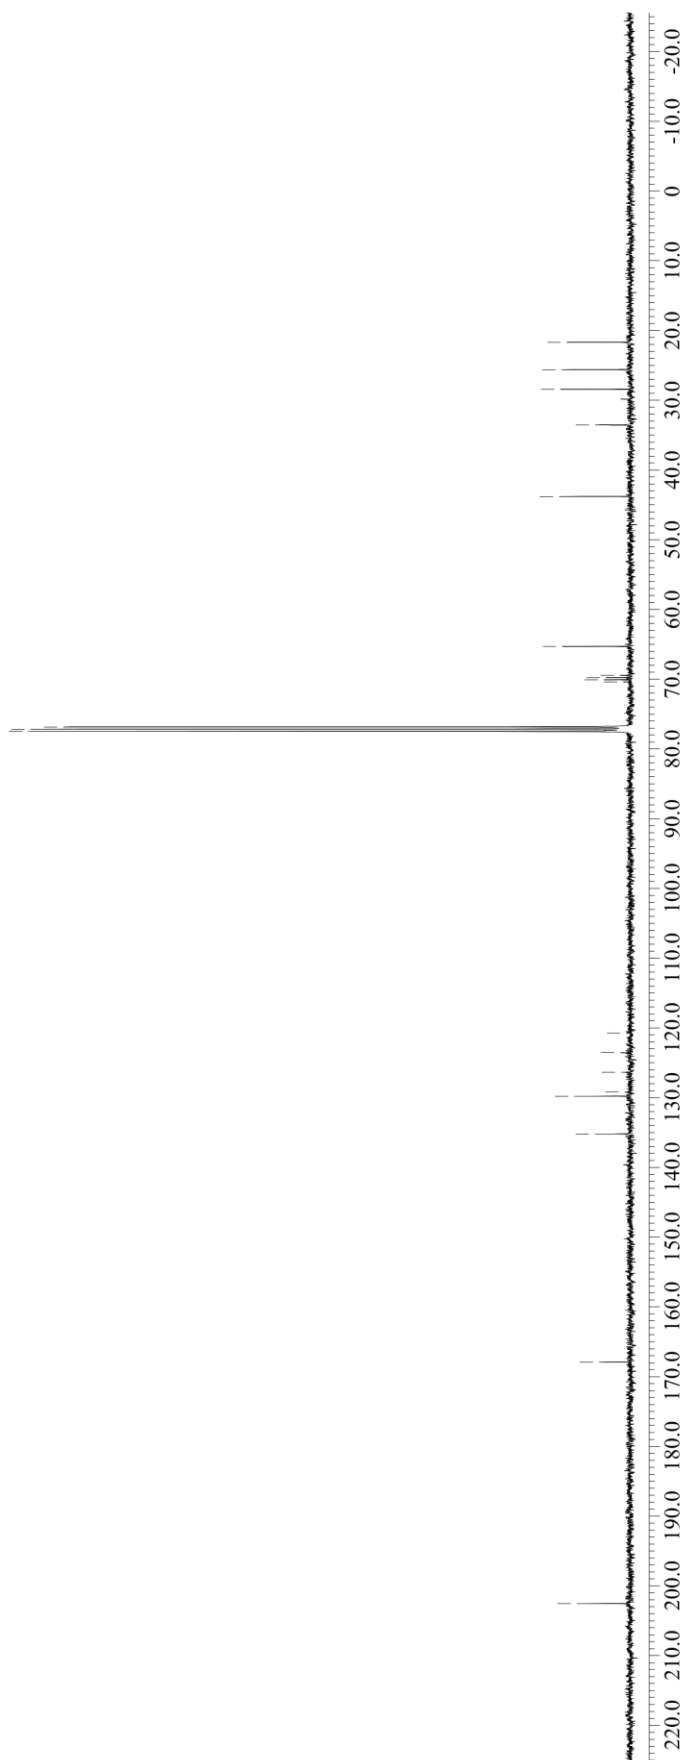

$^{19}\text{F}$  NMR of **9ag** ( $\text{CDCl}_3$ , 375 MHz, 25 °C)

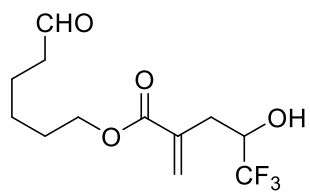

-79.544  
-79.560

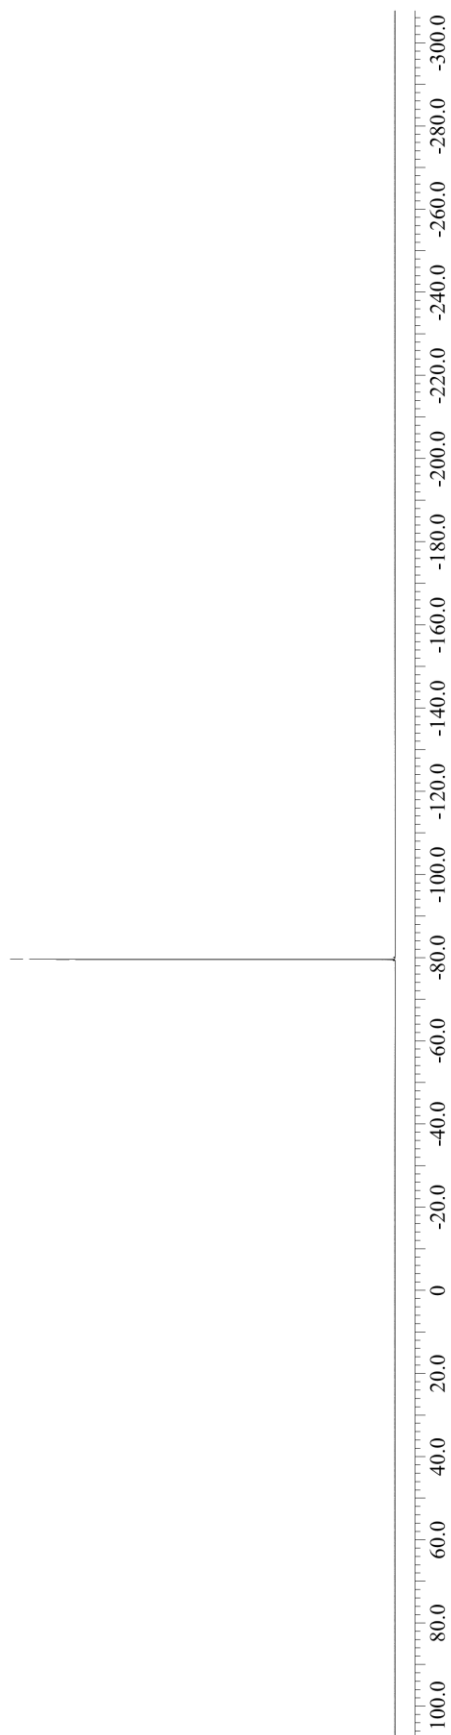

$^1\text{H}$  NMR of **9ah** ( $\text{CDCl}_3$ , 400 MHz, 25  $^\circ\text{C}$ )

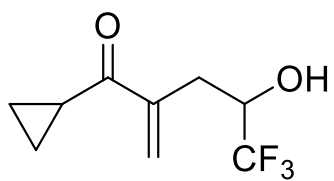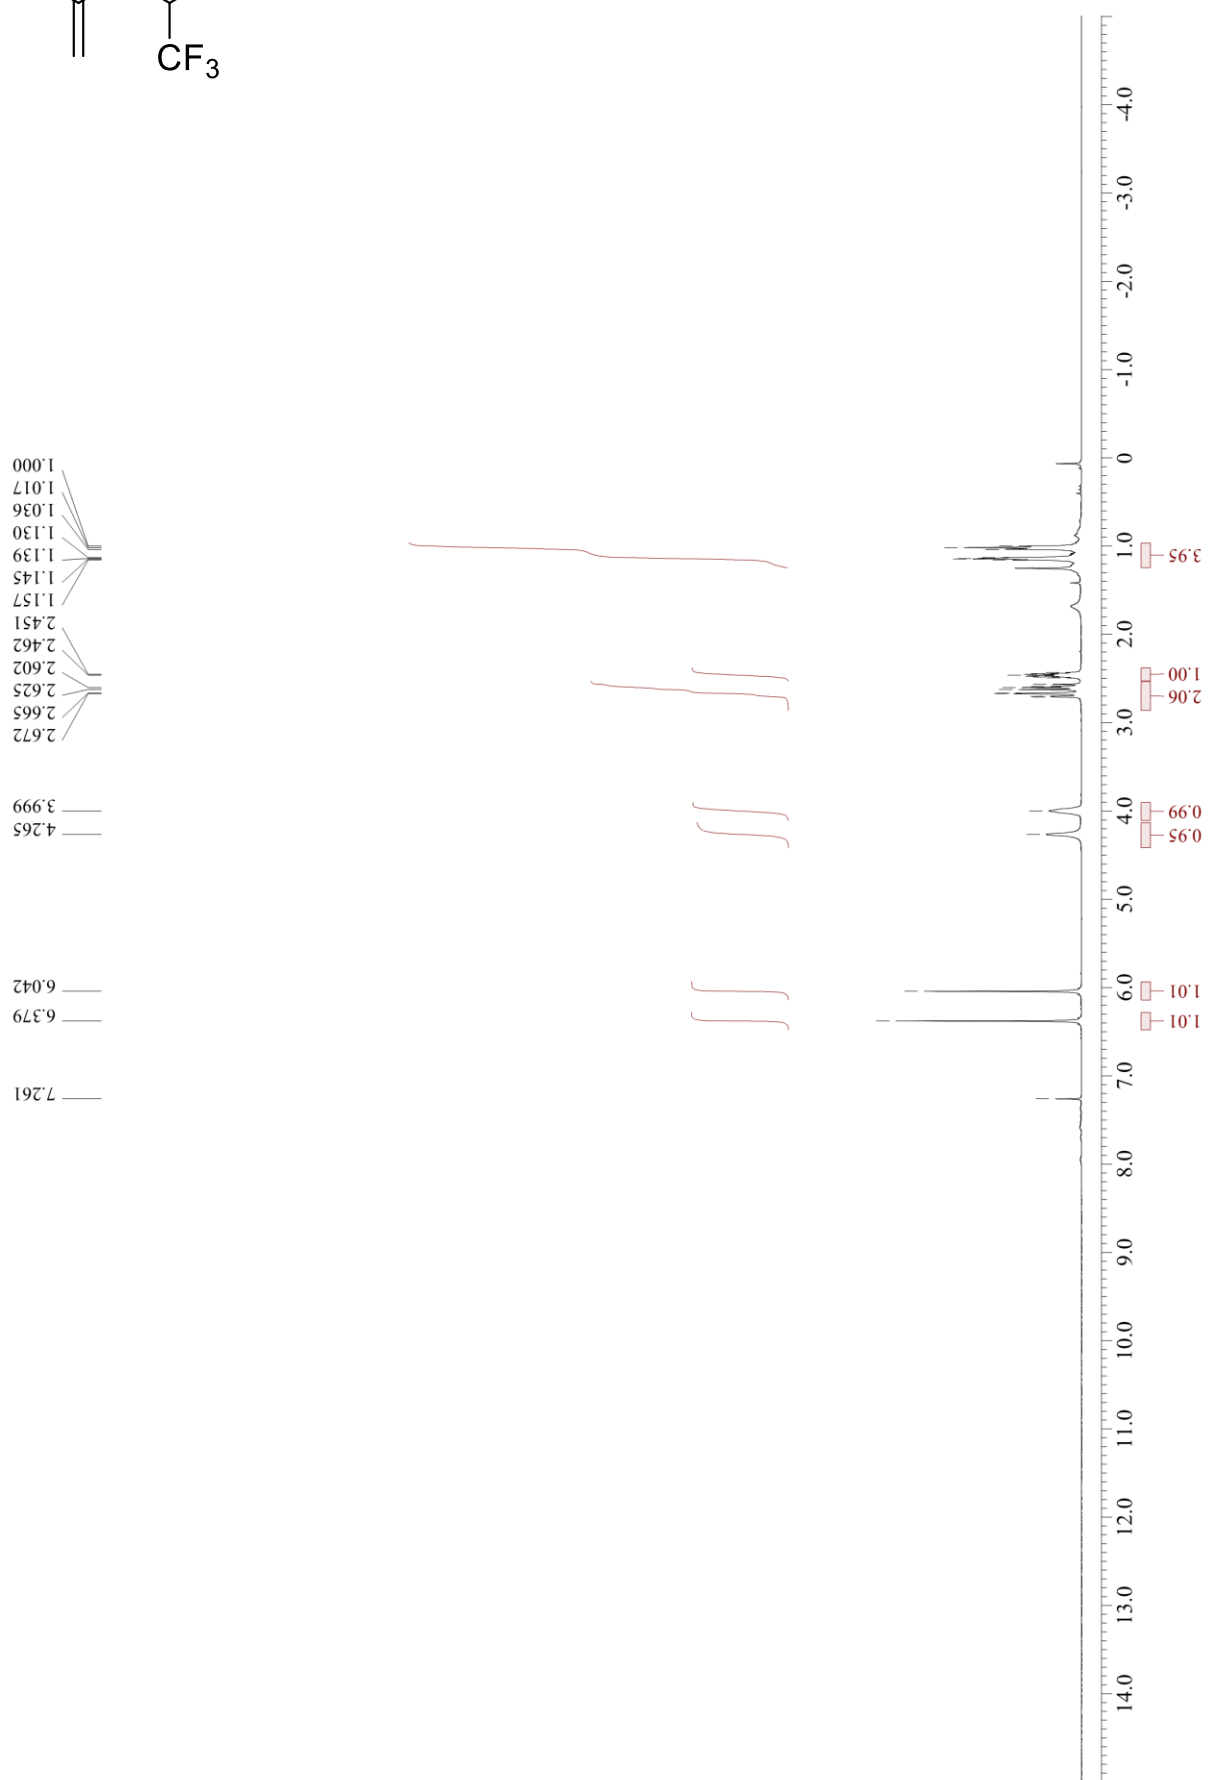

$^{13}\text{C}$  NMR of **9ah** ( $\text{CDCl}_3$ , 100 MHz, 25 °C)

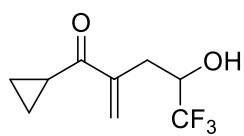

16.808  
12.668  
12.333

33.444

77.476  
77.160  
76.844  
70.950  
70.644  
70.337  
70.030

129.290  
129.204  
126.396  
123.588  
120.781

144.345

204.486

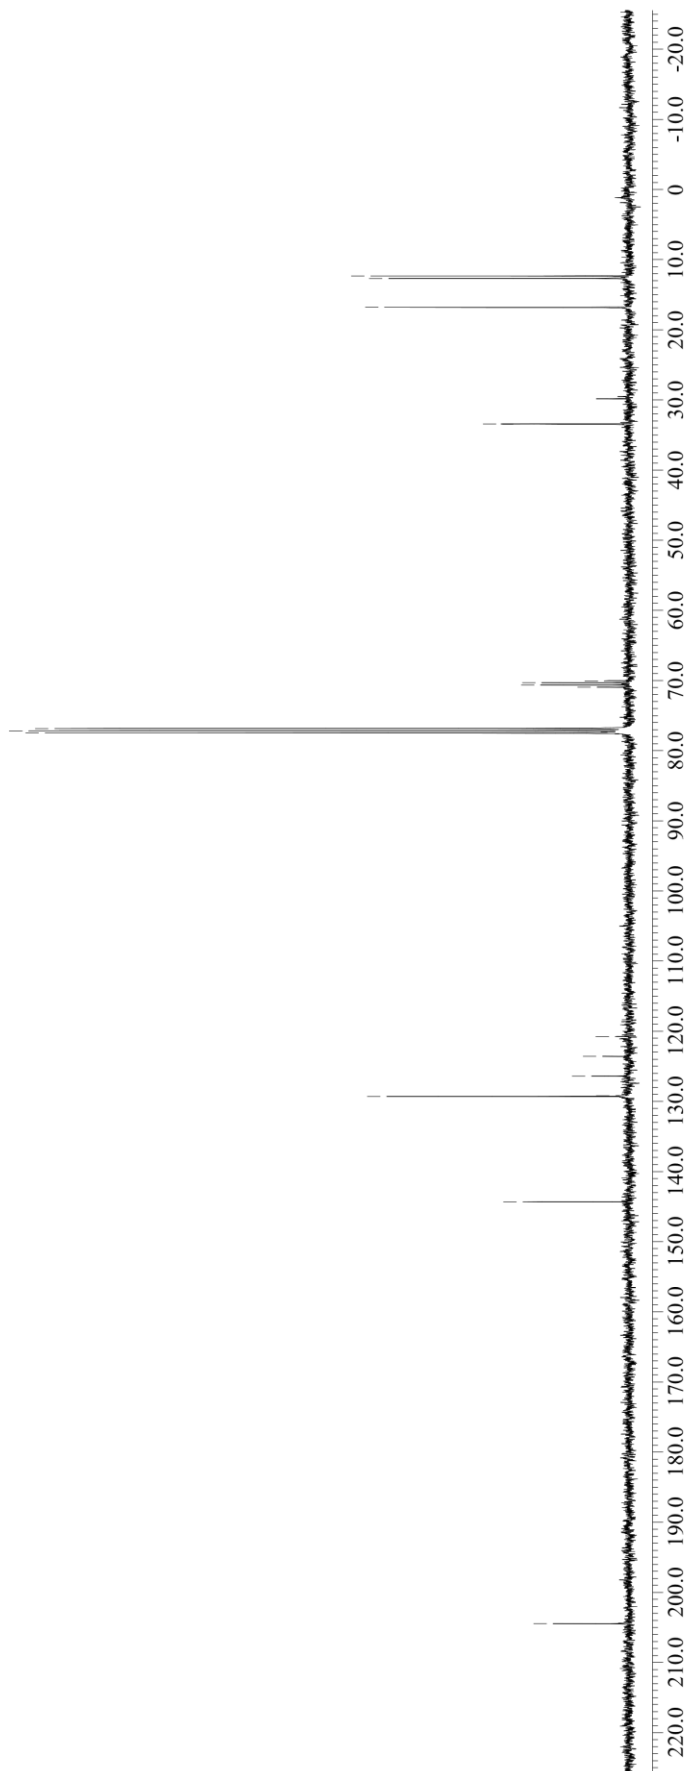

$^{19}\text{F}$  NMR of **9ah** ( $\text{CDCl}_3$ , 375 MHz, 25  $^\circ\text{C}$ )

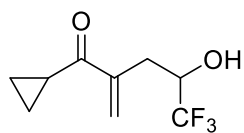

-79.441  
-79.457

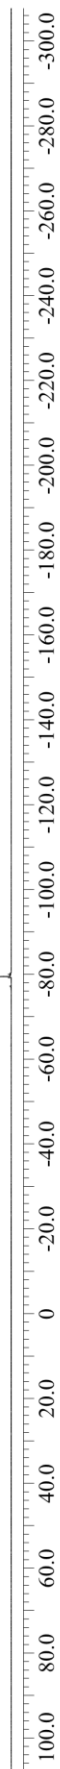

<sup>1</sup>H NMR of **9ai** (CDCl<sub>3</sub>, 400 MHz, 25 °C)

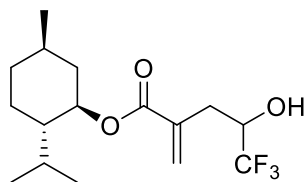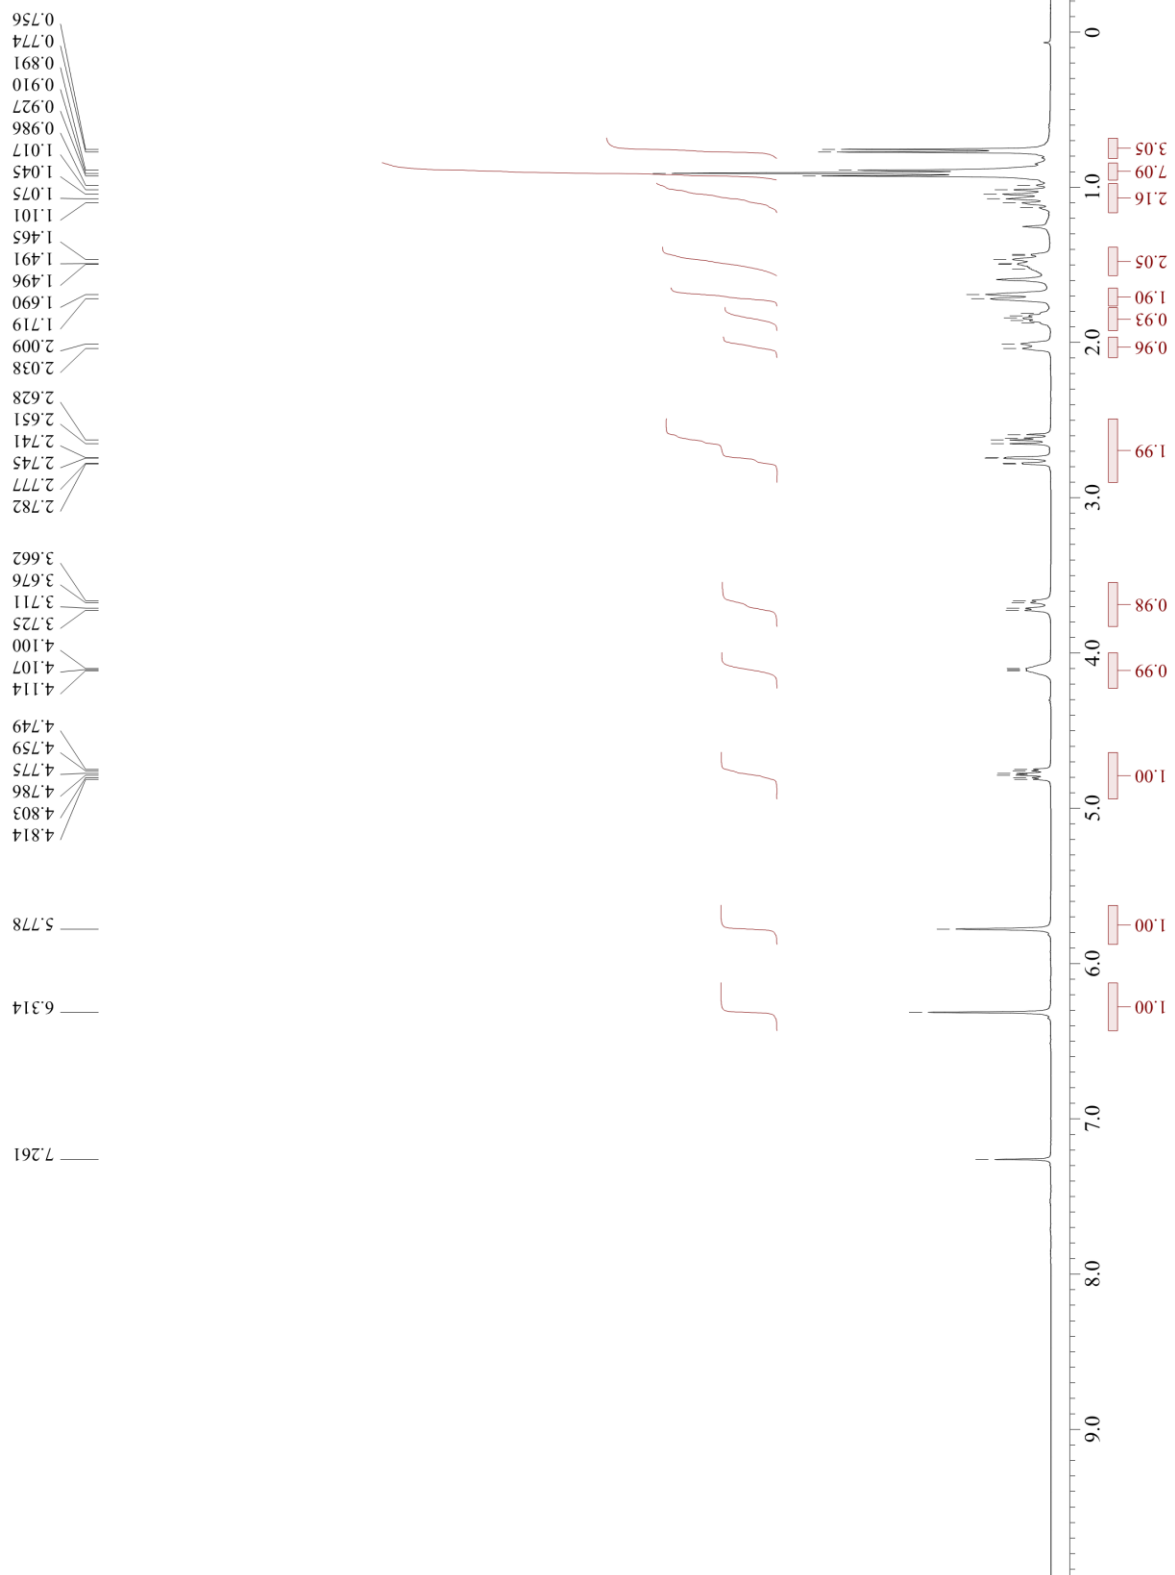



$^{13}\text{C}$  NMR of **9ai** ( $\text{CDCl}_3$ , 100 MHz, 25 °C)

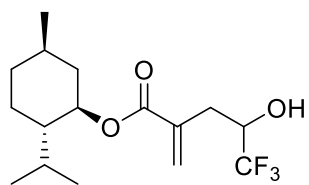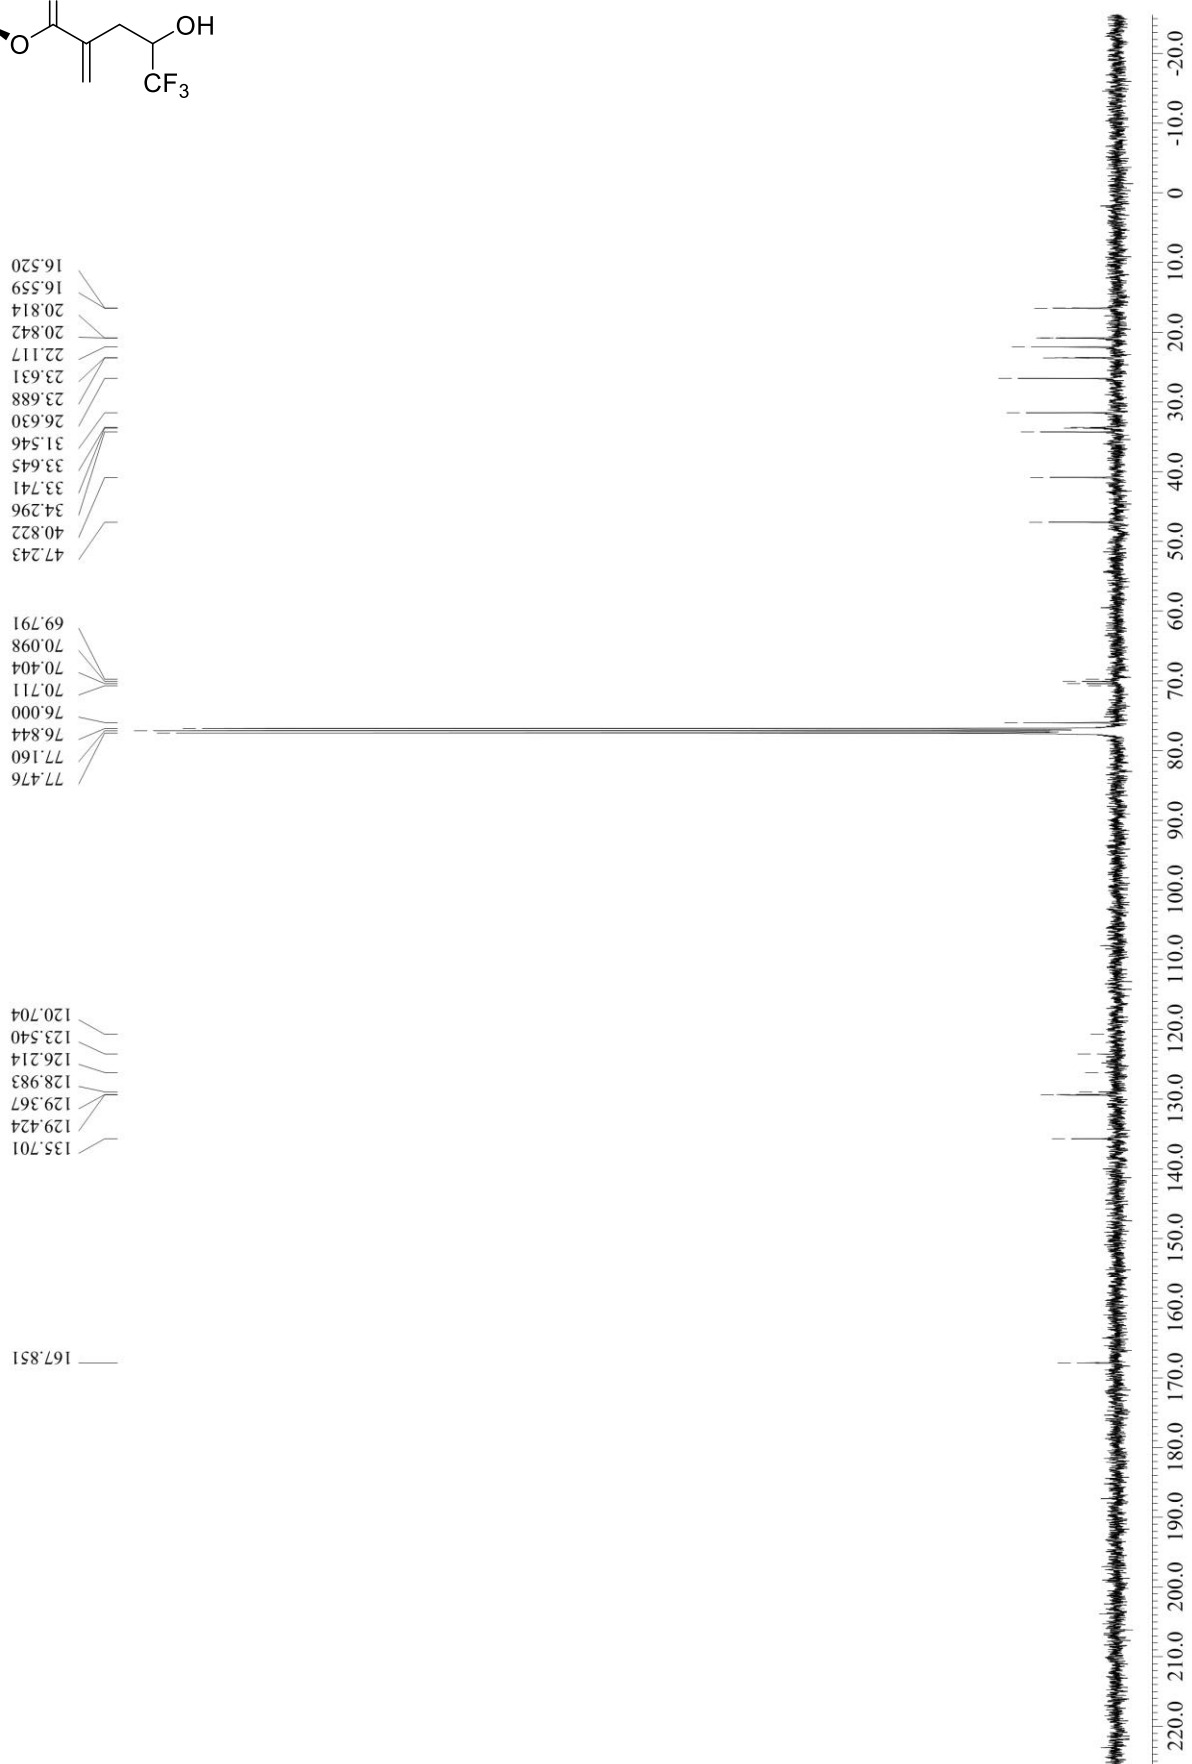

$^{19}\text{F}$  NMR of **9ai** ( $\text{CDCl}_3$ , 375 MHz, 25 °C)

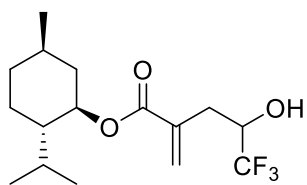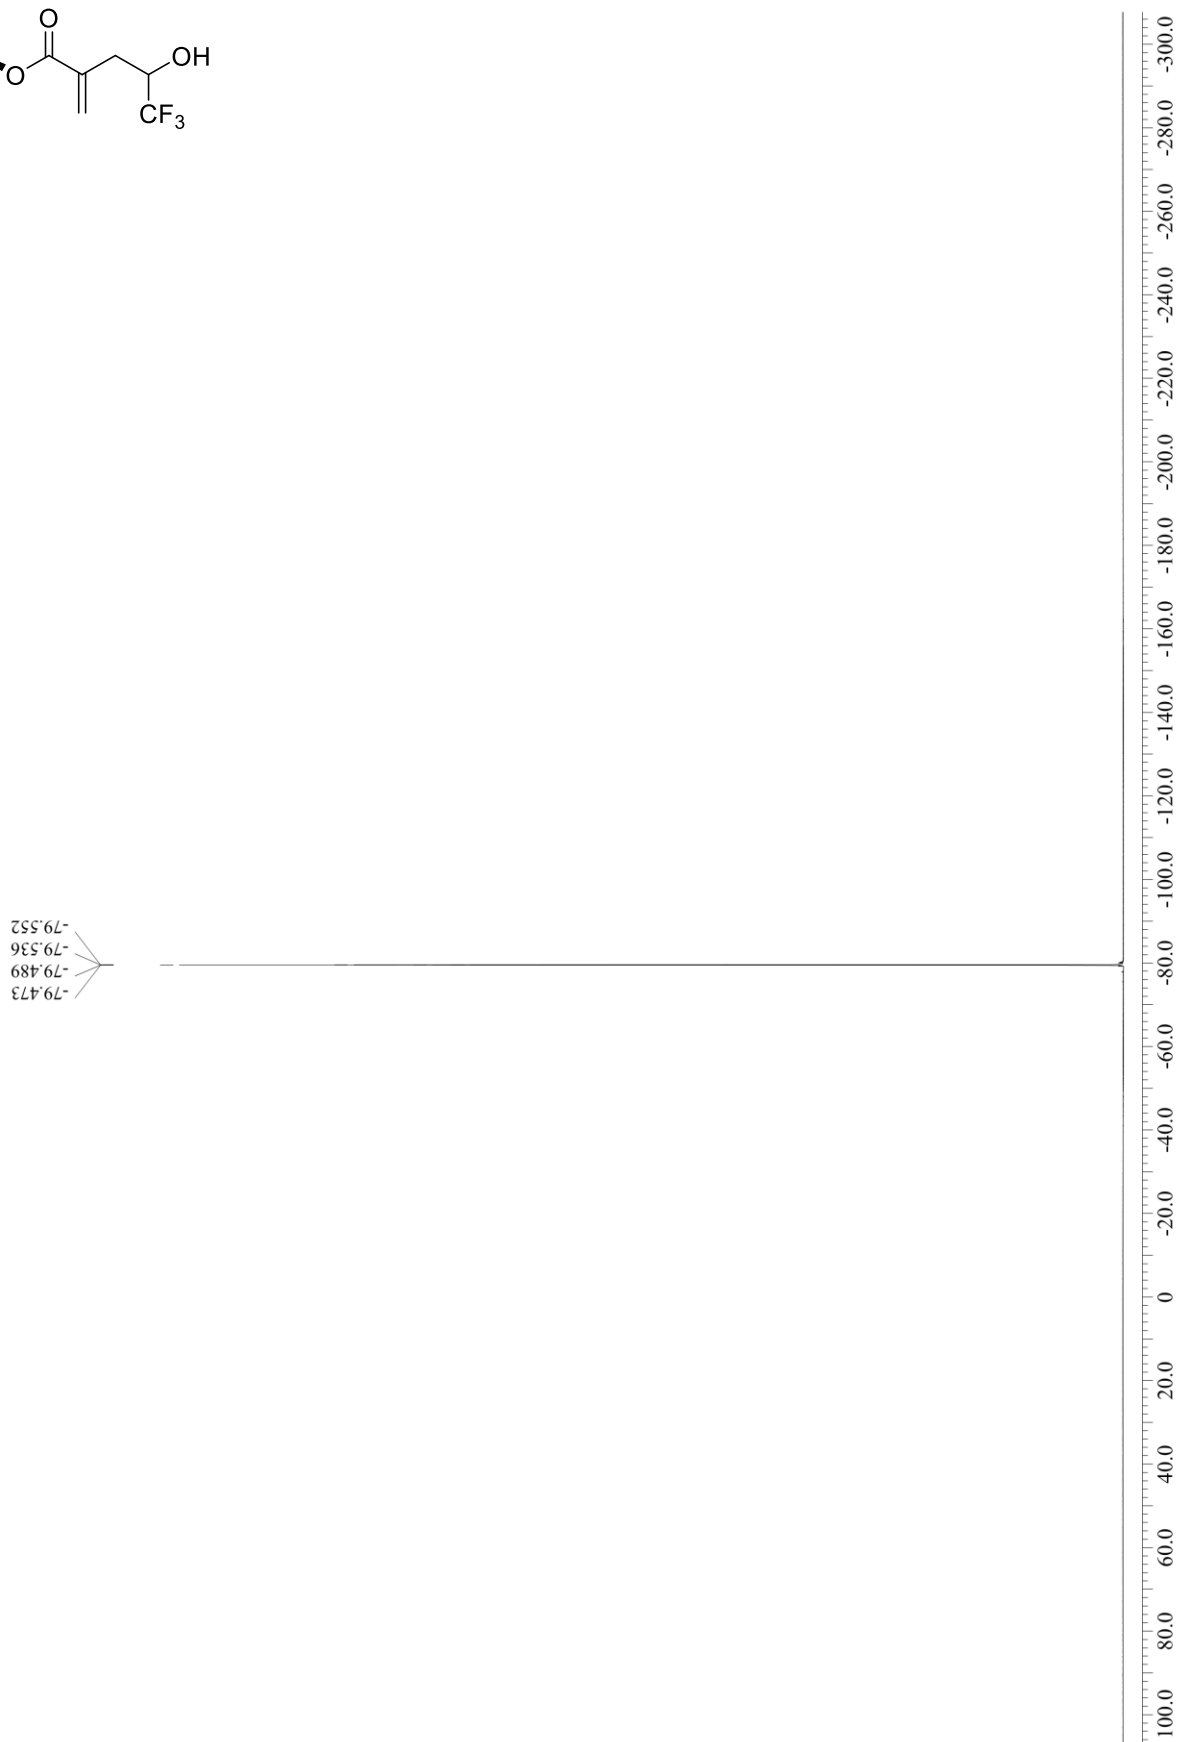

$^1\text{H}$  NMR of **9aj** ( $\text{CDCl}_3$ , 400 MHz, 25  $^\circ\text{C}$ )

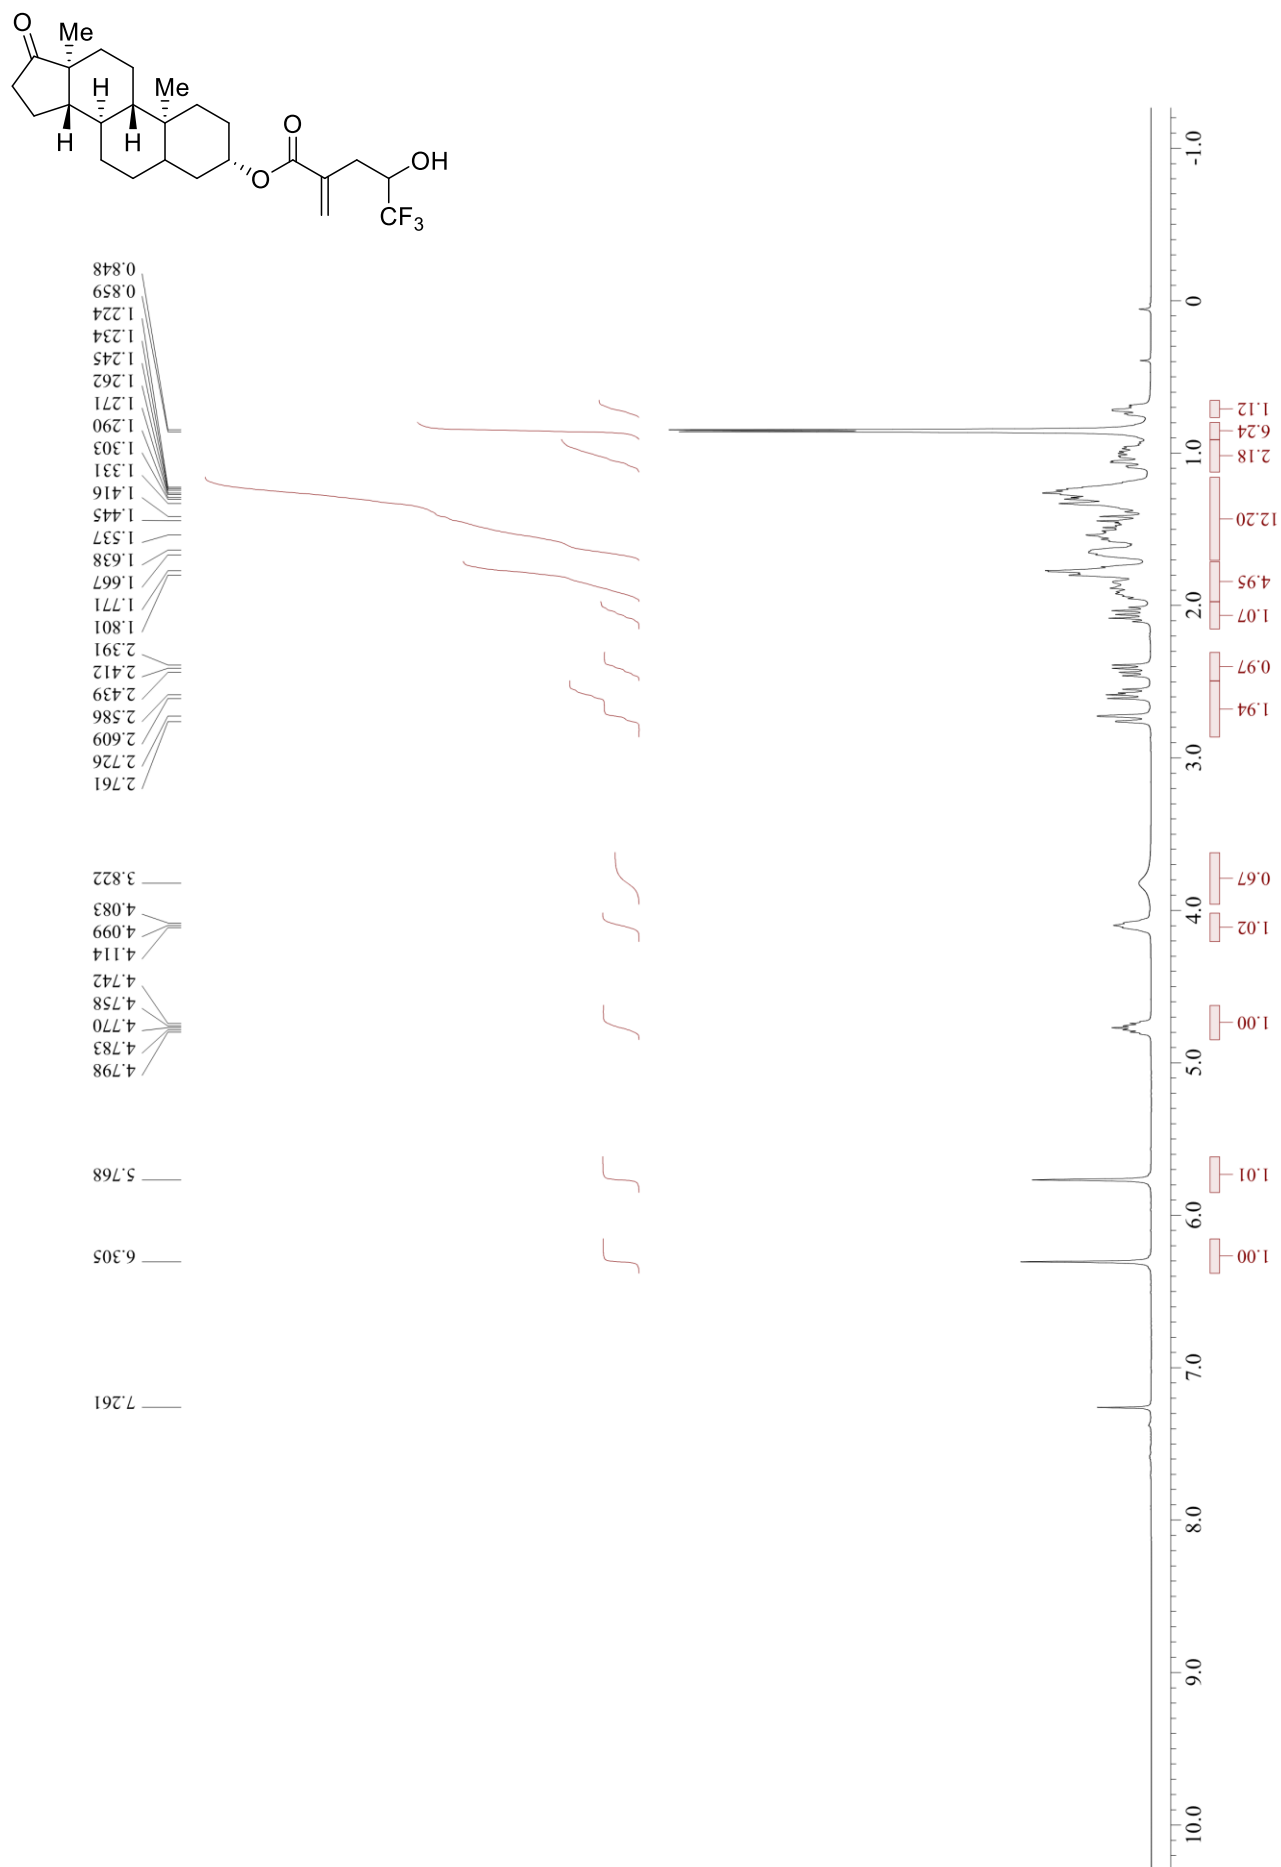

$^{13}\text{C}$  NMR of **9aj** ( $\text{CDCl}_3$ , 100 MHz, 25 °C)

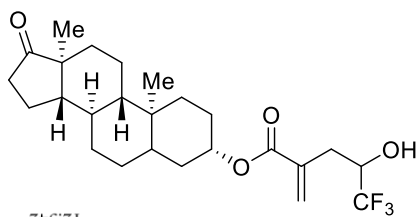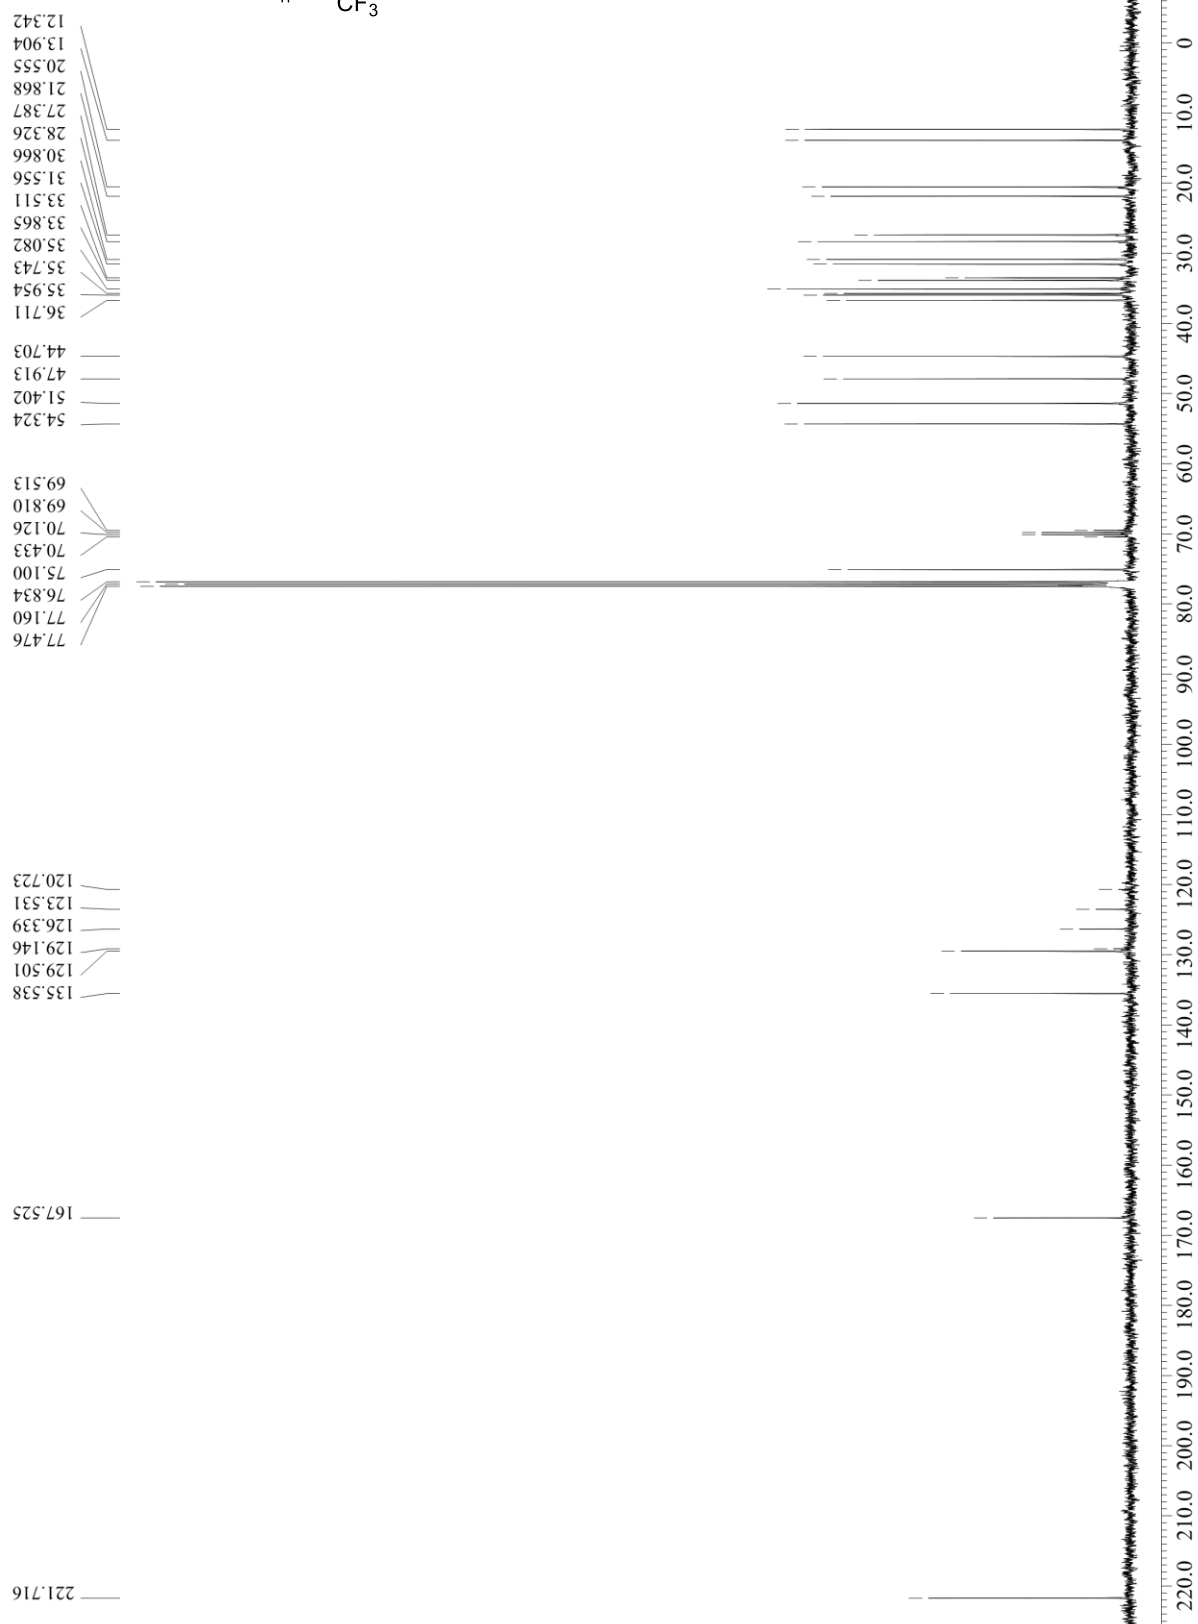

$^{19}\text{F}$  NMR of **9aj** ( $\text{CDCl}_3$ , 375 MHz, 25  $^\circ\text{C}$ )

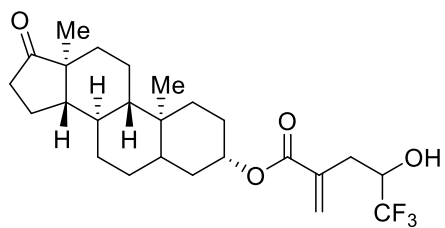

-79.528  
-79.512  
-79.481

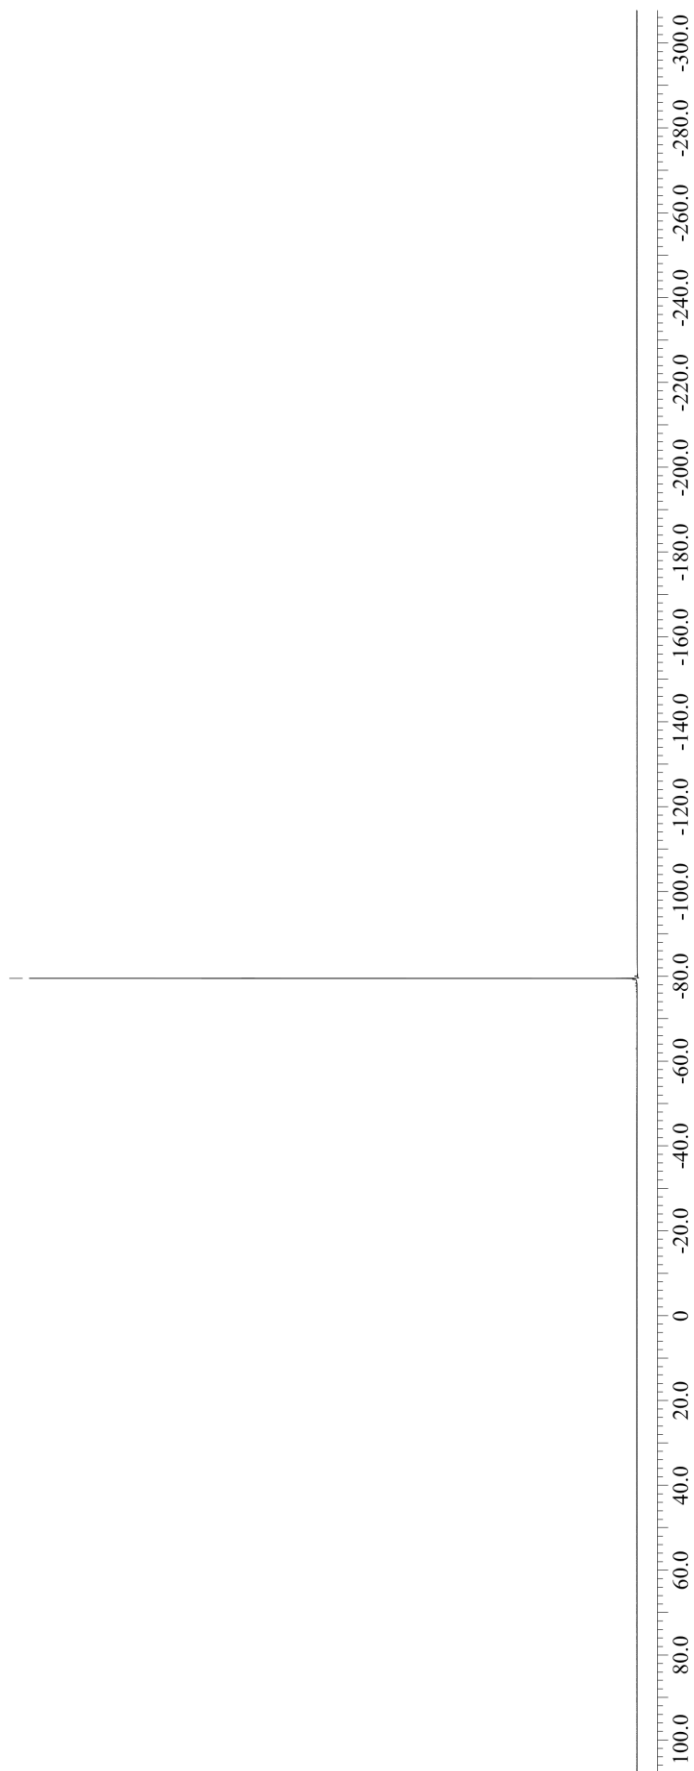

<sup>1</sup>H NMR of **9ak** (CDCl<sub>3</sub>, 400 MHz, 25 °C)

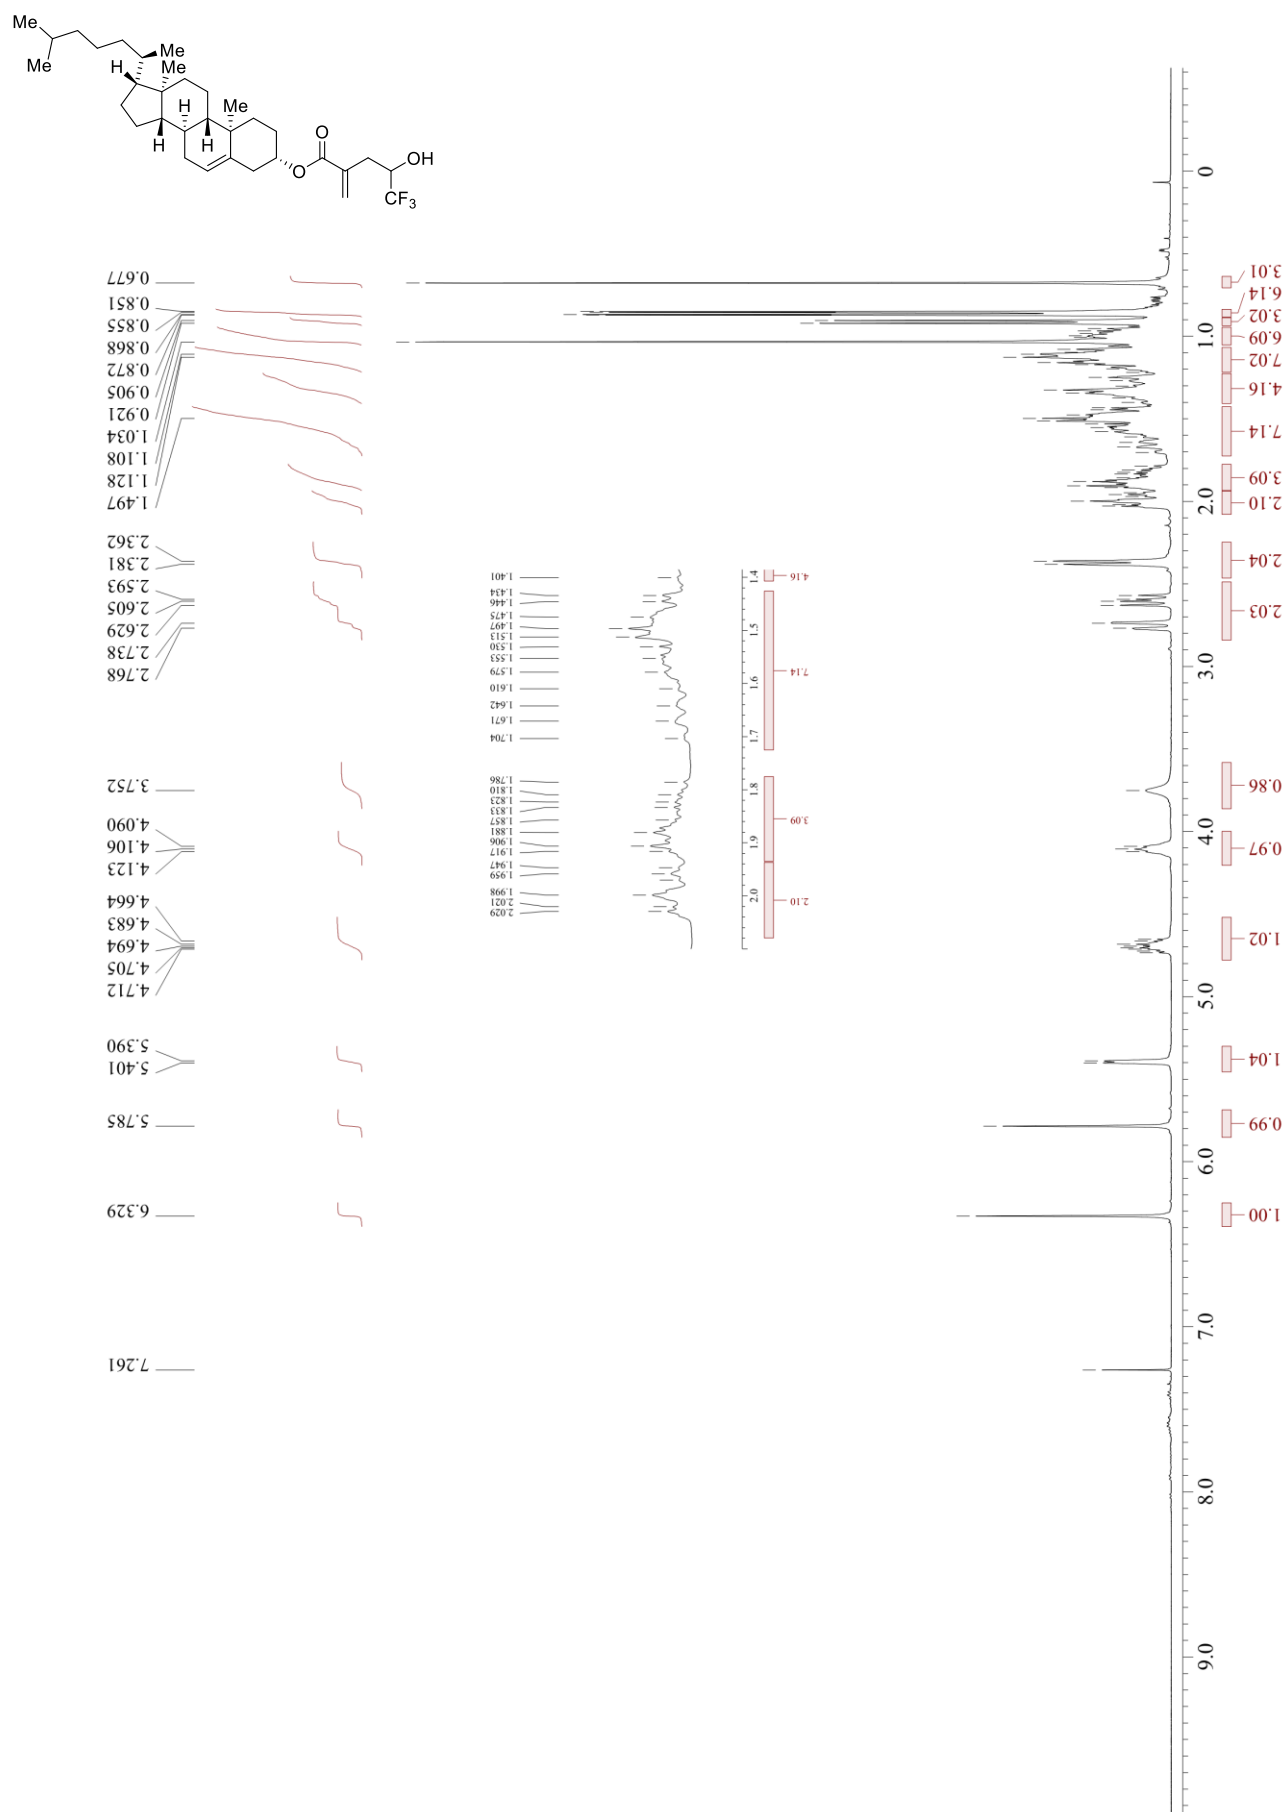

<sup>13</sup>C NMR of **9ak** (CDCl<sub>3</sub>, 100 MHz, 25 °C)

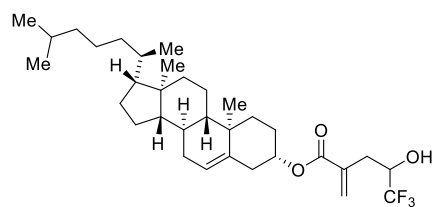

11.978  
18.839  
19.453  
22.701  
22.970  
28.144  
31.939  
36.702  
39.634  
42.413  
50.089  
56.222  
56.778  
69.647  
69.954  
70.260  
70.567  
75.636  
76.844  
77.160  
77.476

120.704  
123.186  
123.512  
126.319  
129.127  
129.606  
135.557  
139.362

167.592

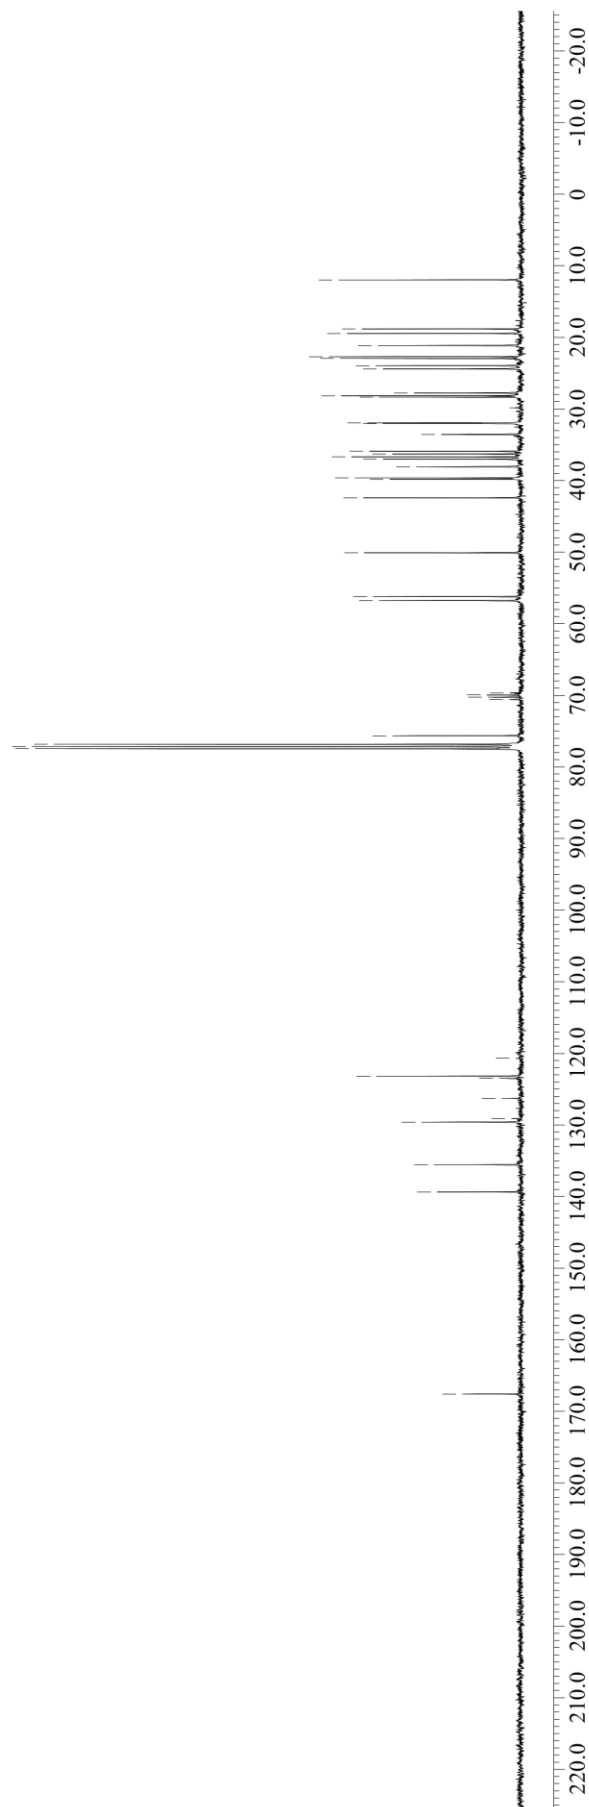

$^{19}\text{F}$  NMR of **9ak** ( $\text{CDCl}_3$ , 375 MHz, 25 °C)

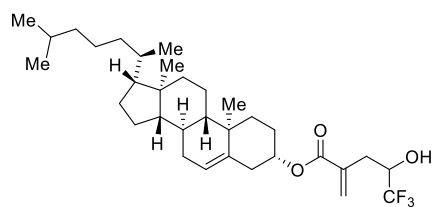

— -79.520

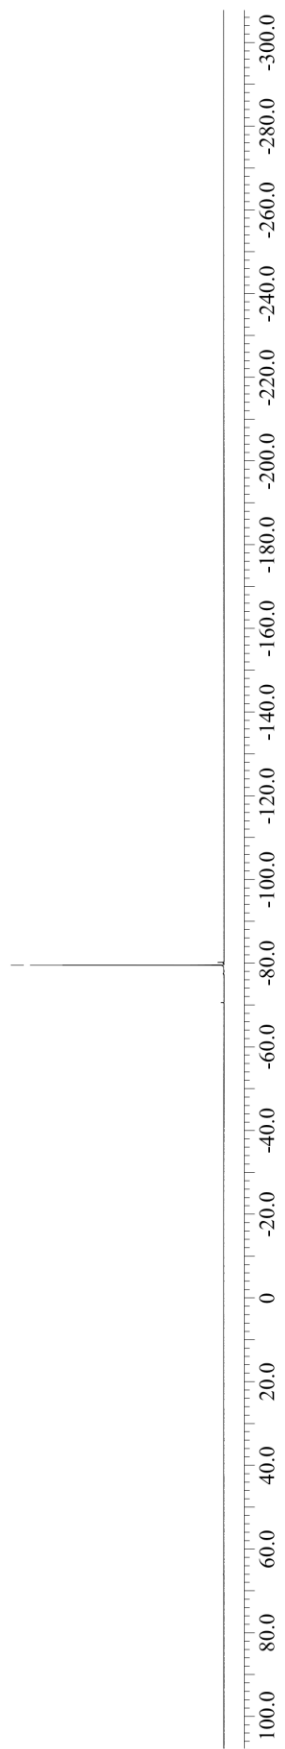



$^1\text{H}$  NMR of **9al** ( $\text{CDCl}_3$ , 400 MHz, 25  $^\circ\text{C}$ )

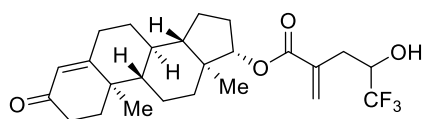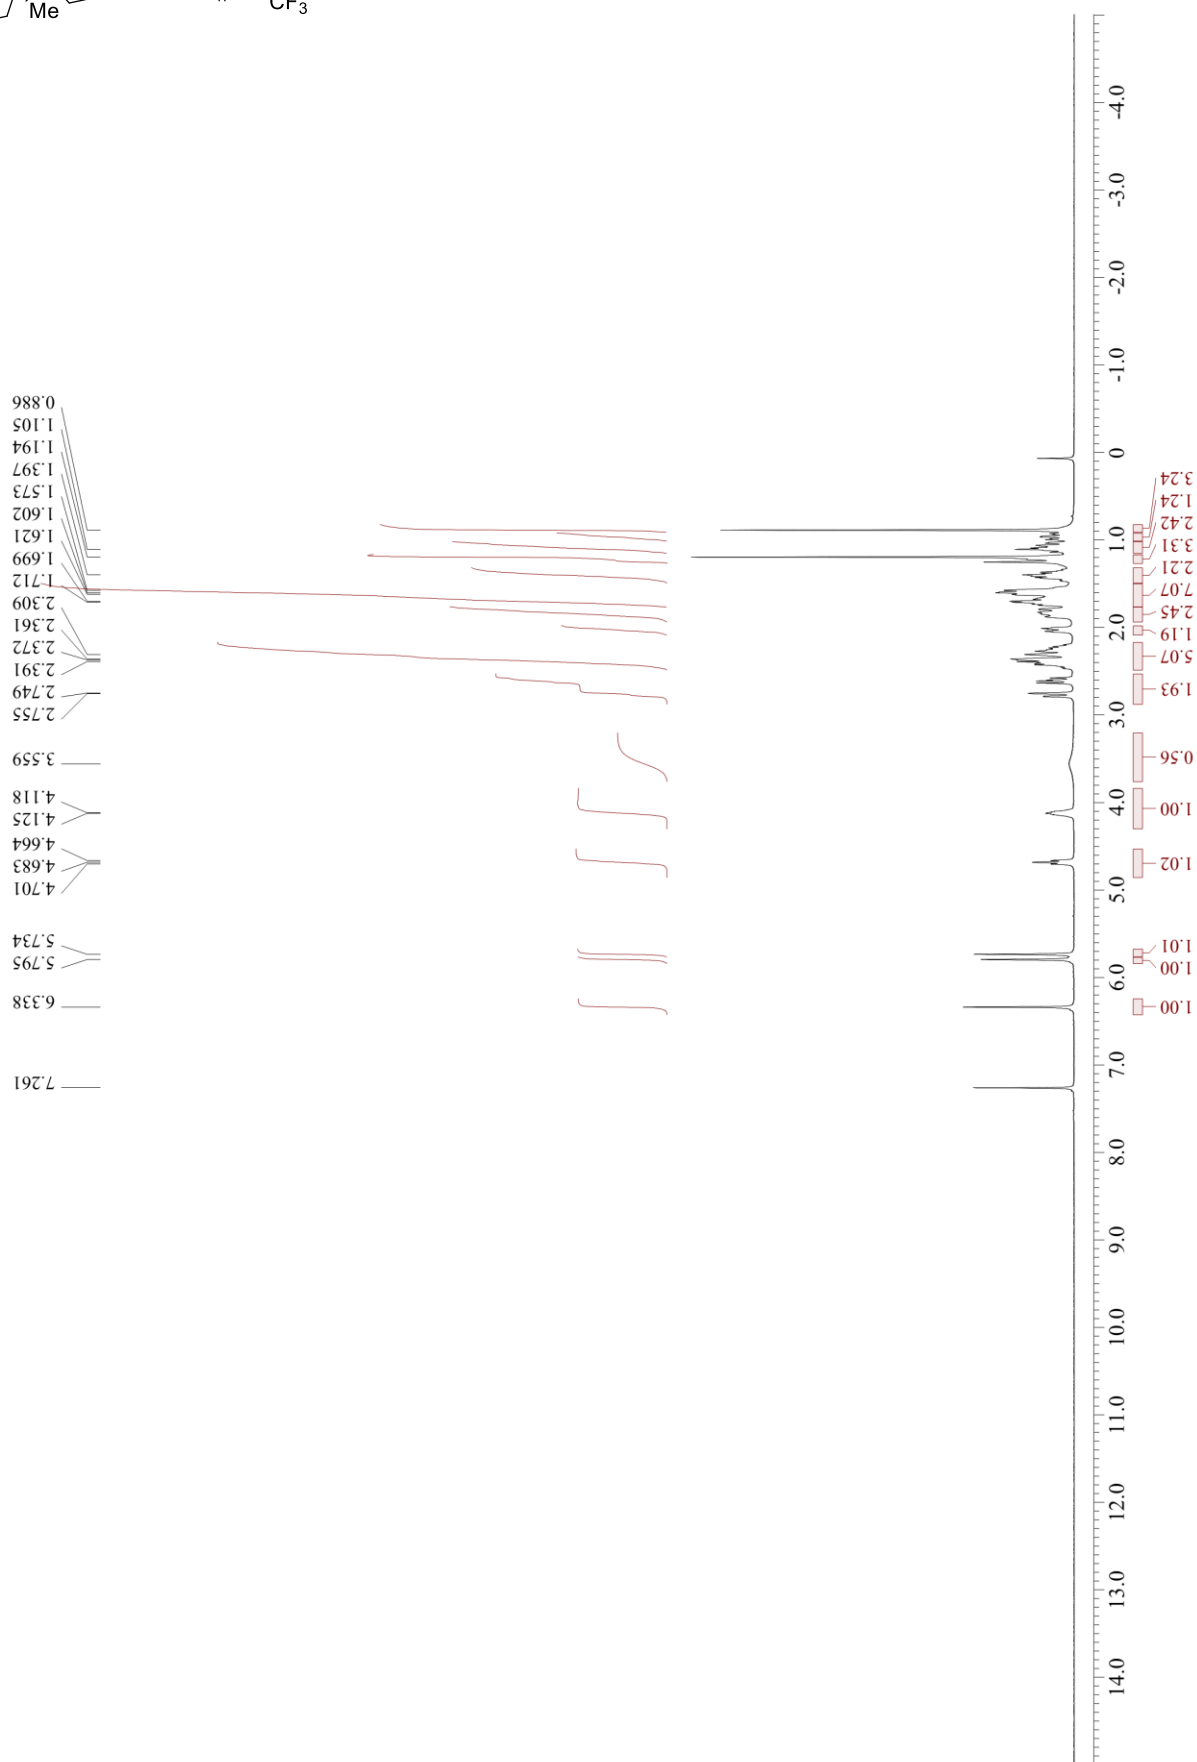

$^{13}\text{C}$  NMR of **9al** ( $\text{CDCl}_3$ , 100 MHz, 25  $^\circ\text{C}$ )

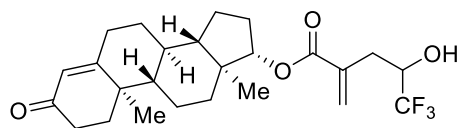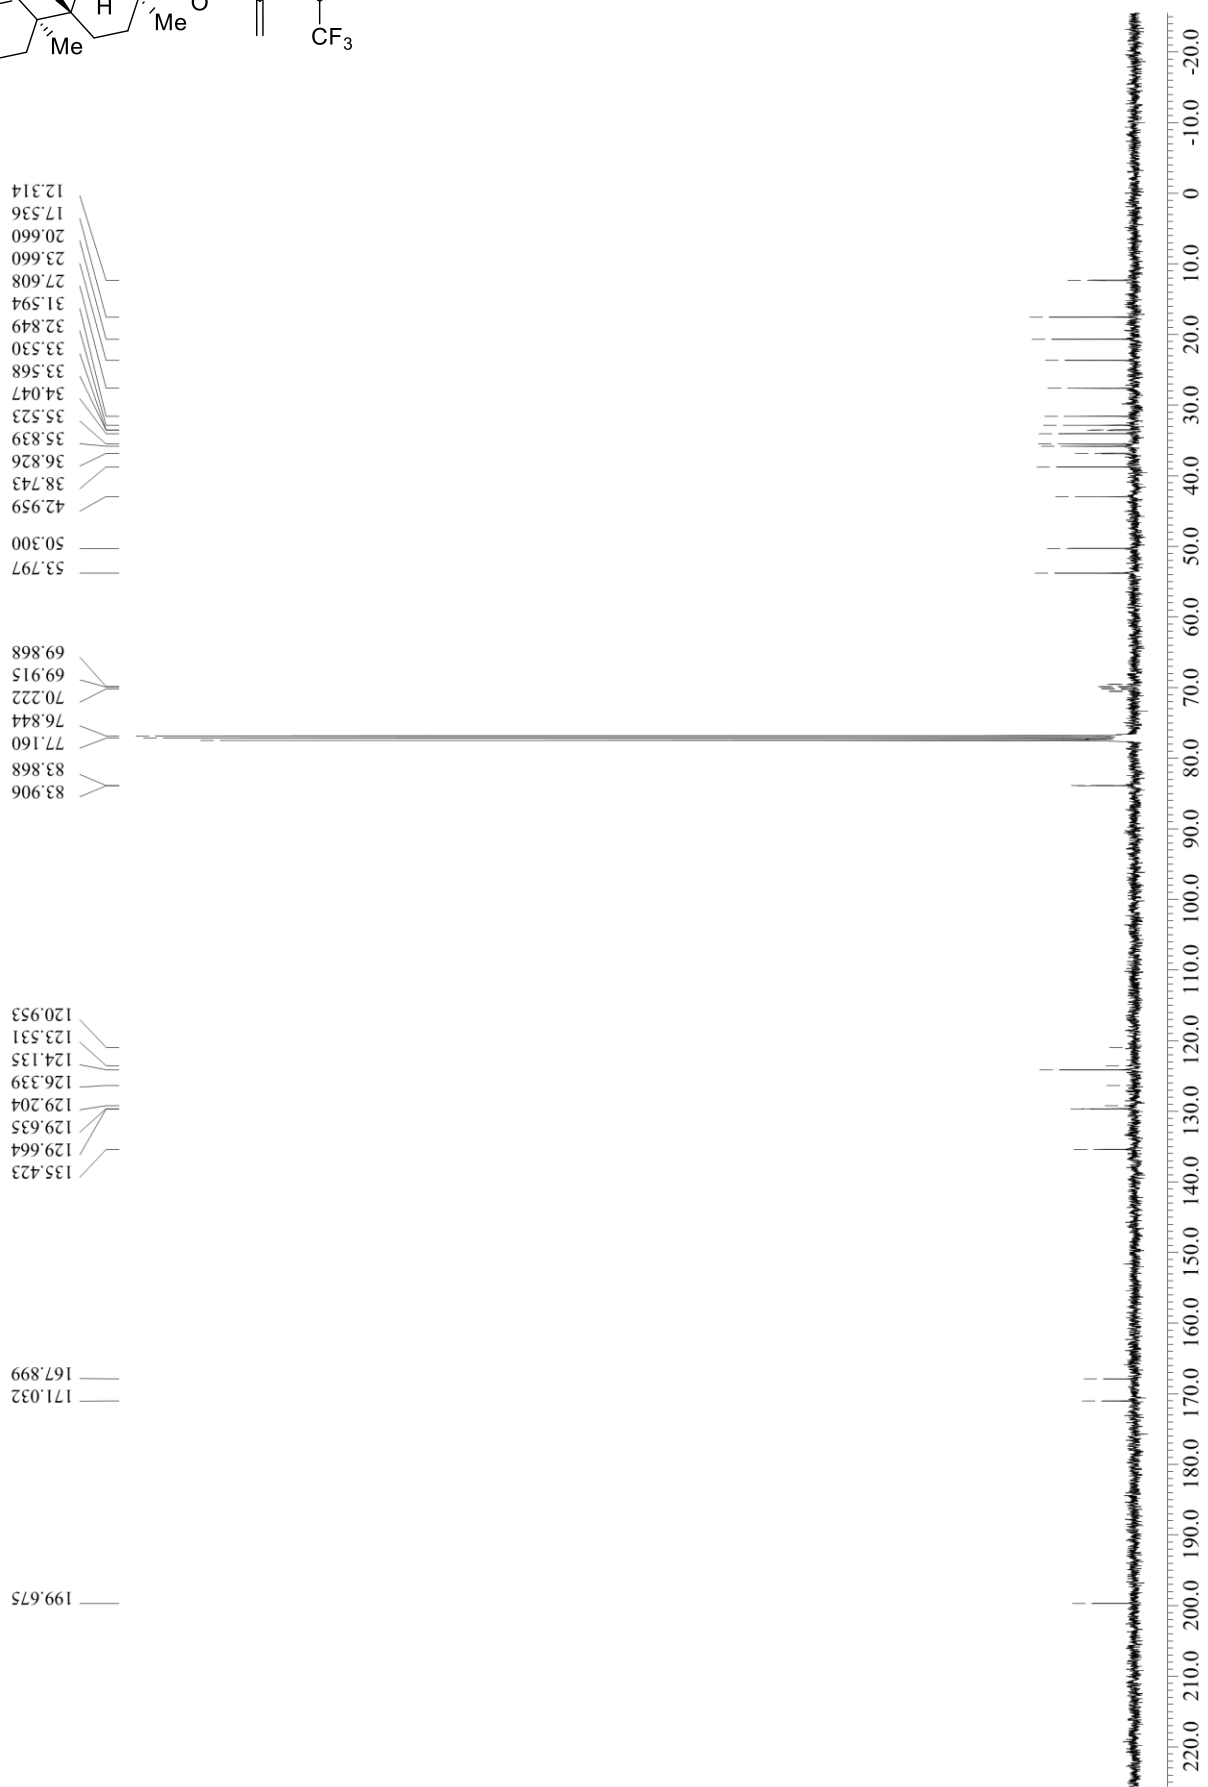

$^{19}\text{F}$  NMR of **9al** ( $\text{CDCl}_3$ , 375 MHz, 25 °C)

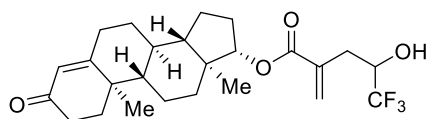

-79.512  
-79.496  
-79.457  
-79.441

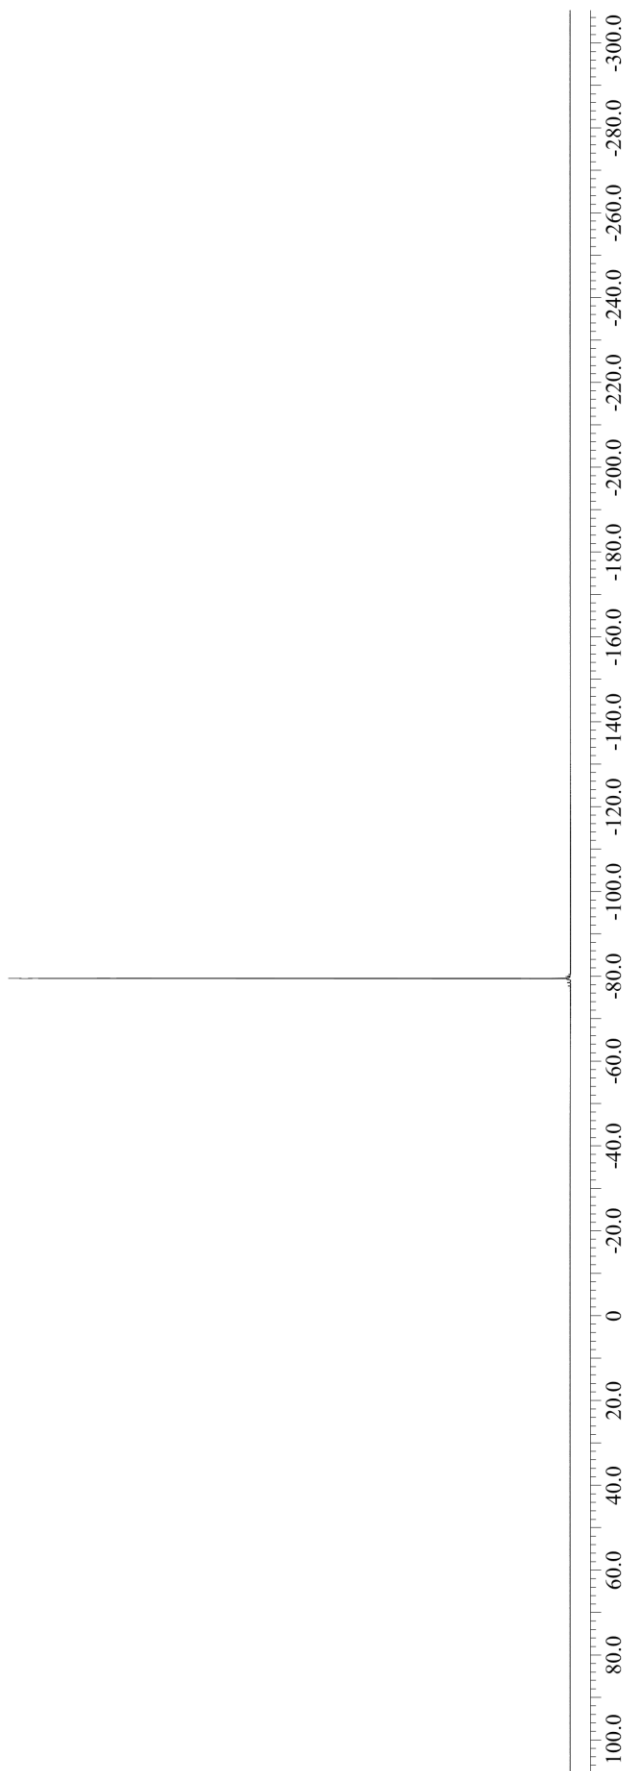

<sup>1</sup>H NMR of **9am** (CDCl<sub>3</sub>, 400 MHz, 25 °C)

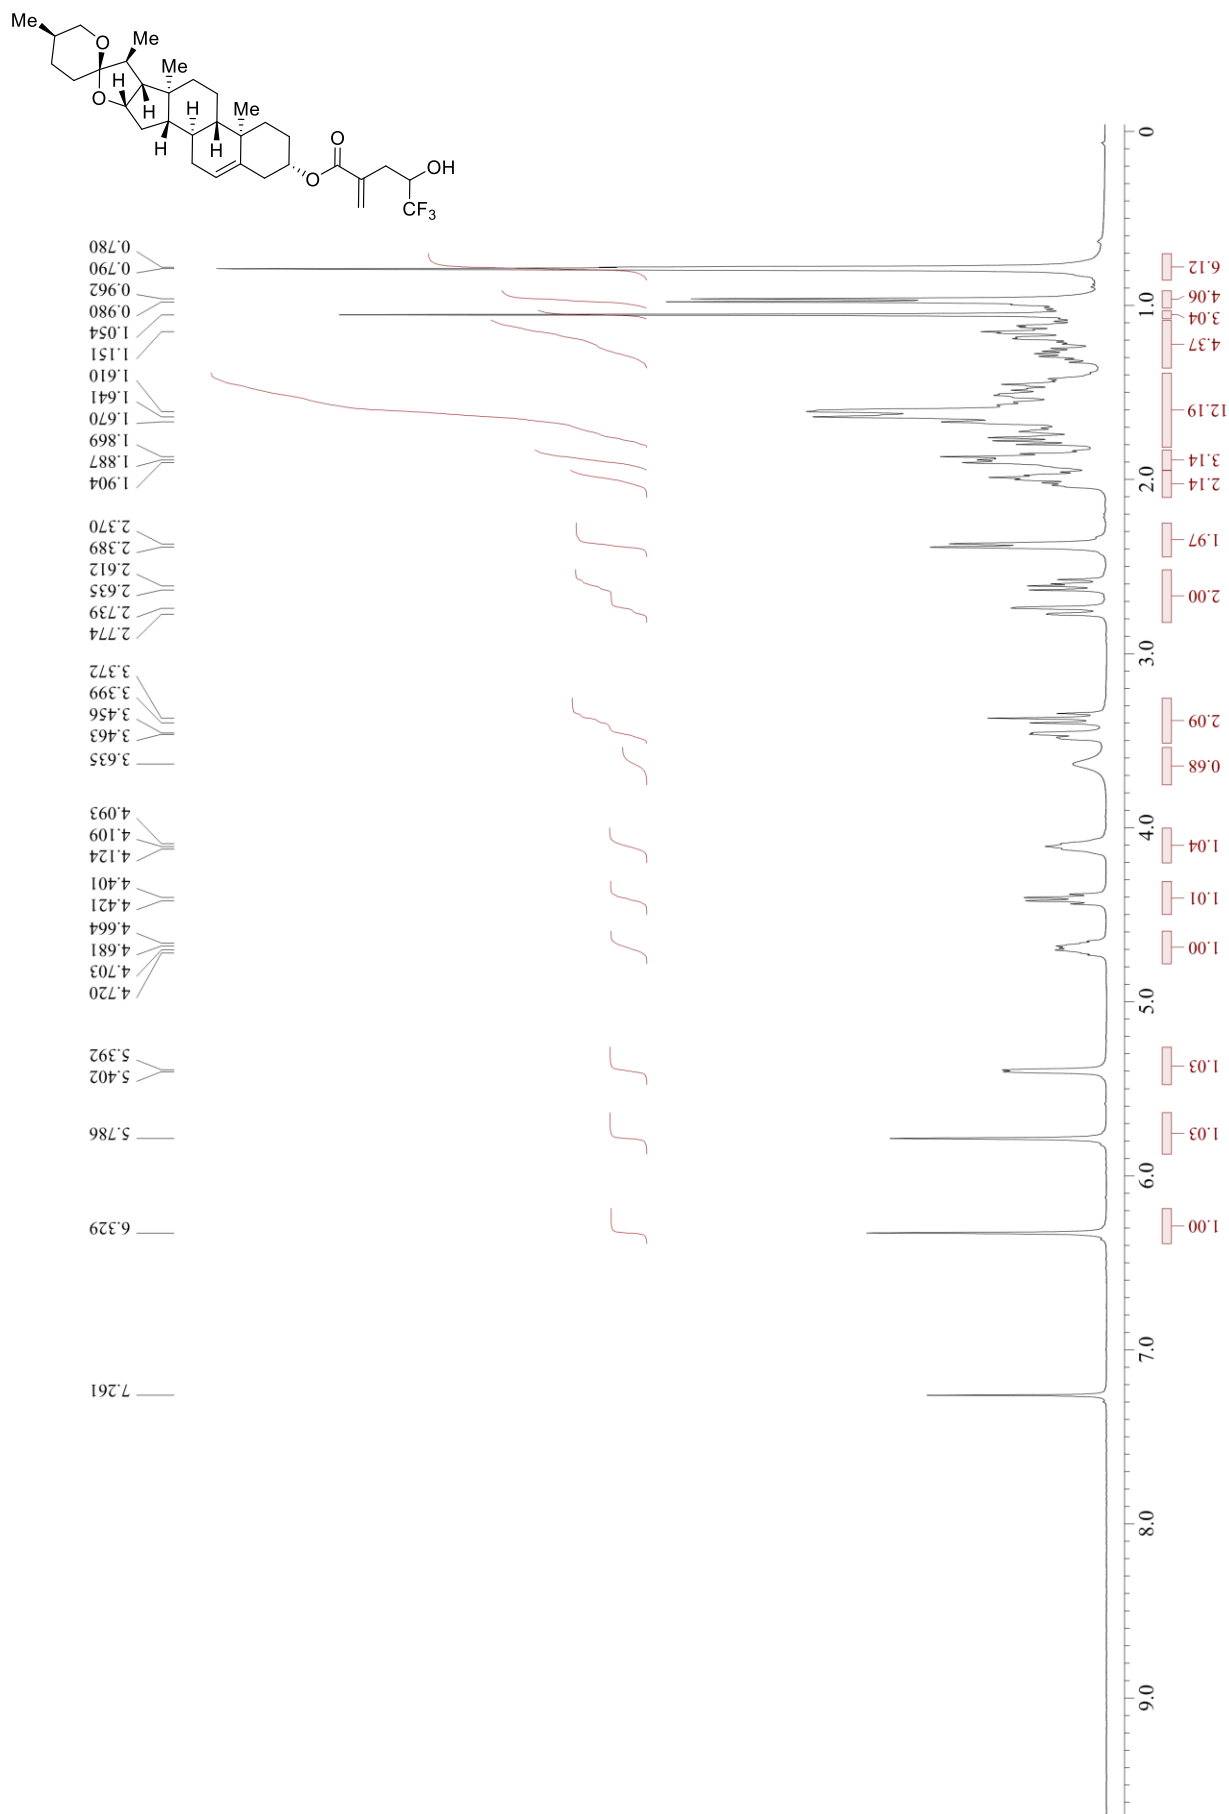

$^{13}\text{C}$  NMR of **9am** ( $\text{CDCl}_3$ , 100 MHz, 25 °C)

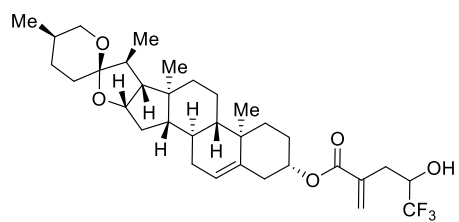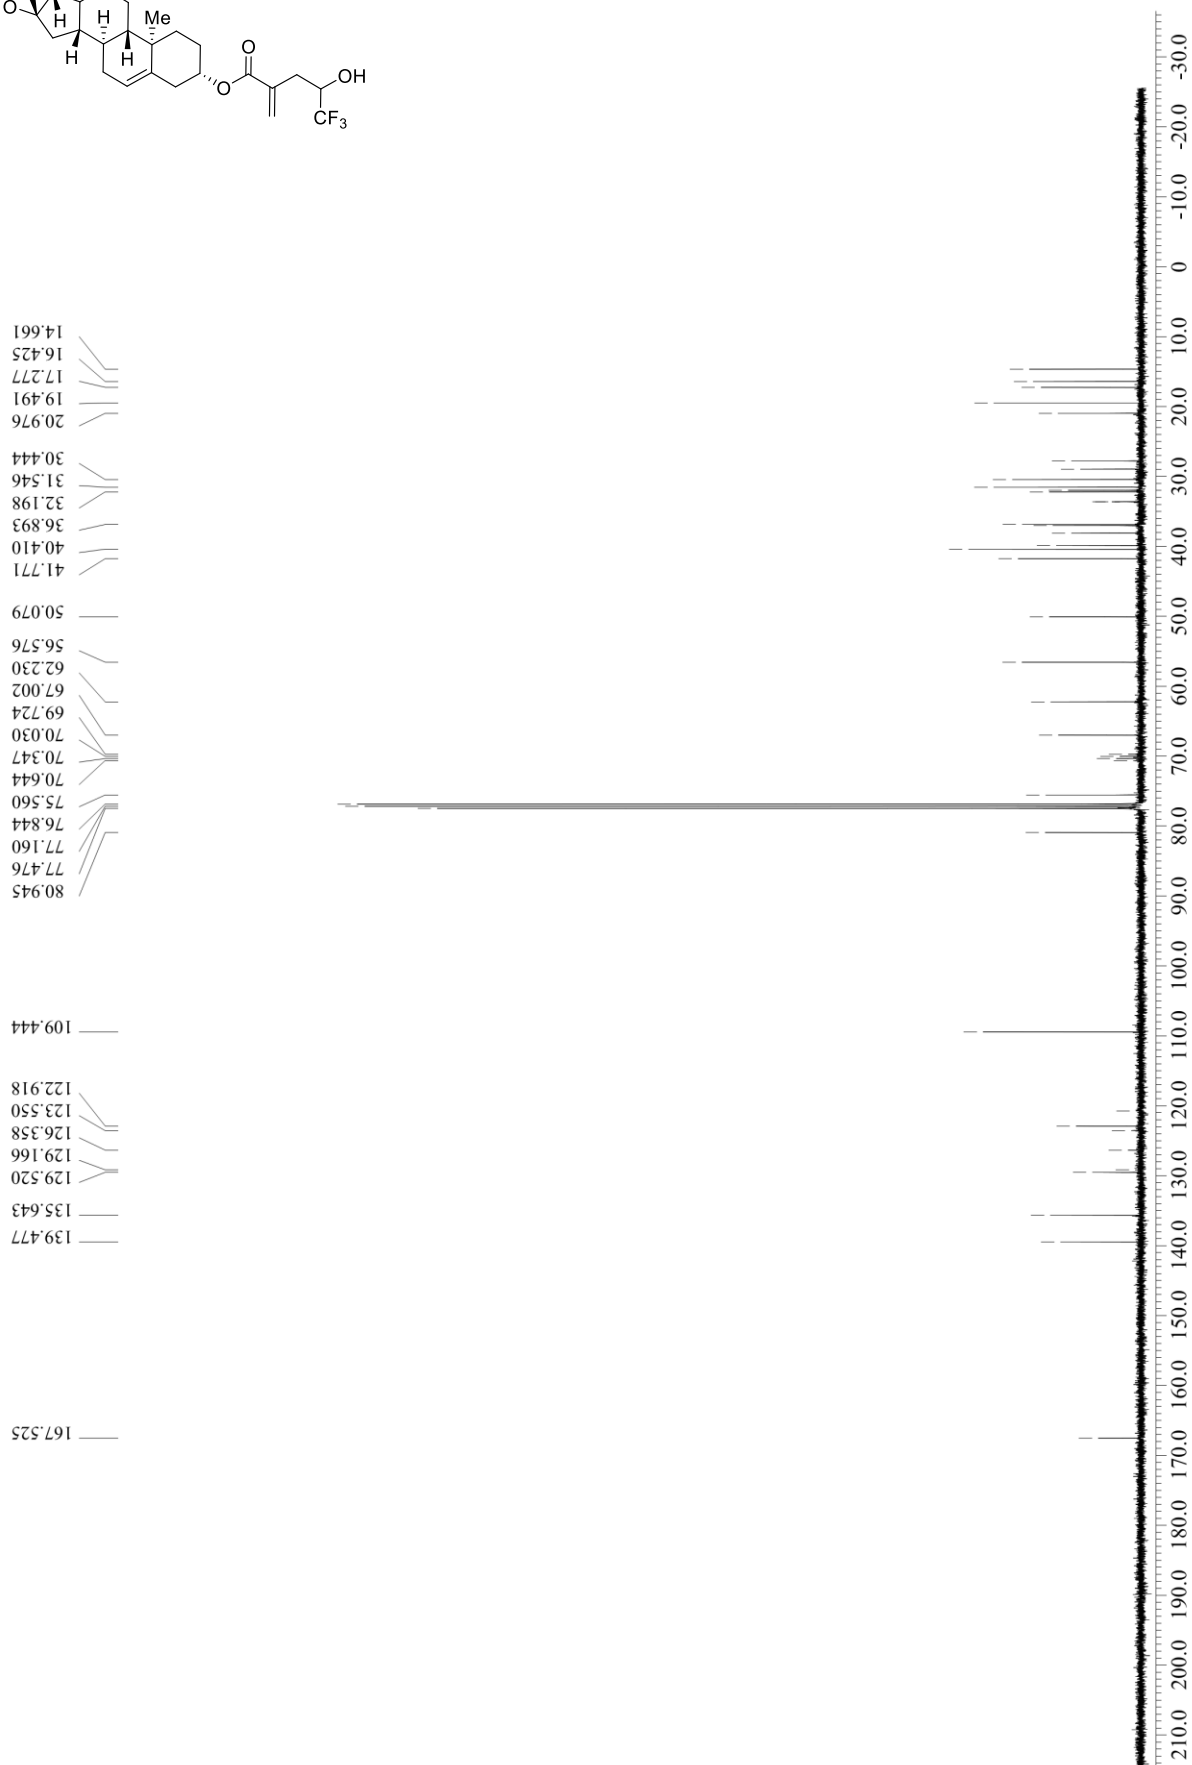

$^{19}\text{F}$  NMR of **9am** ( $\text{CDCl}_3$ , 375 MHz, 25 °C)

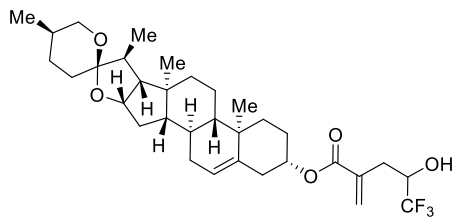

-79.536  
-79.532

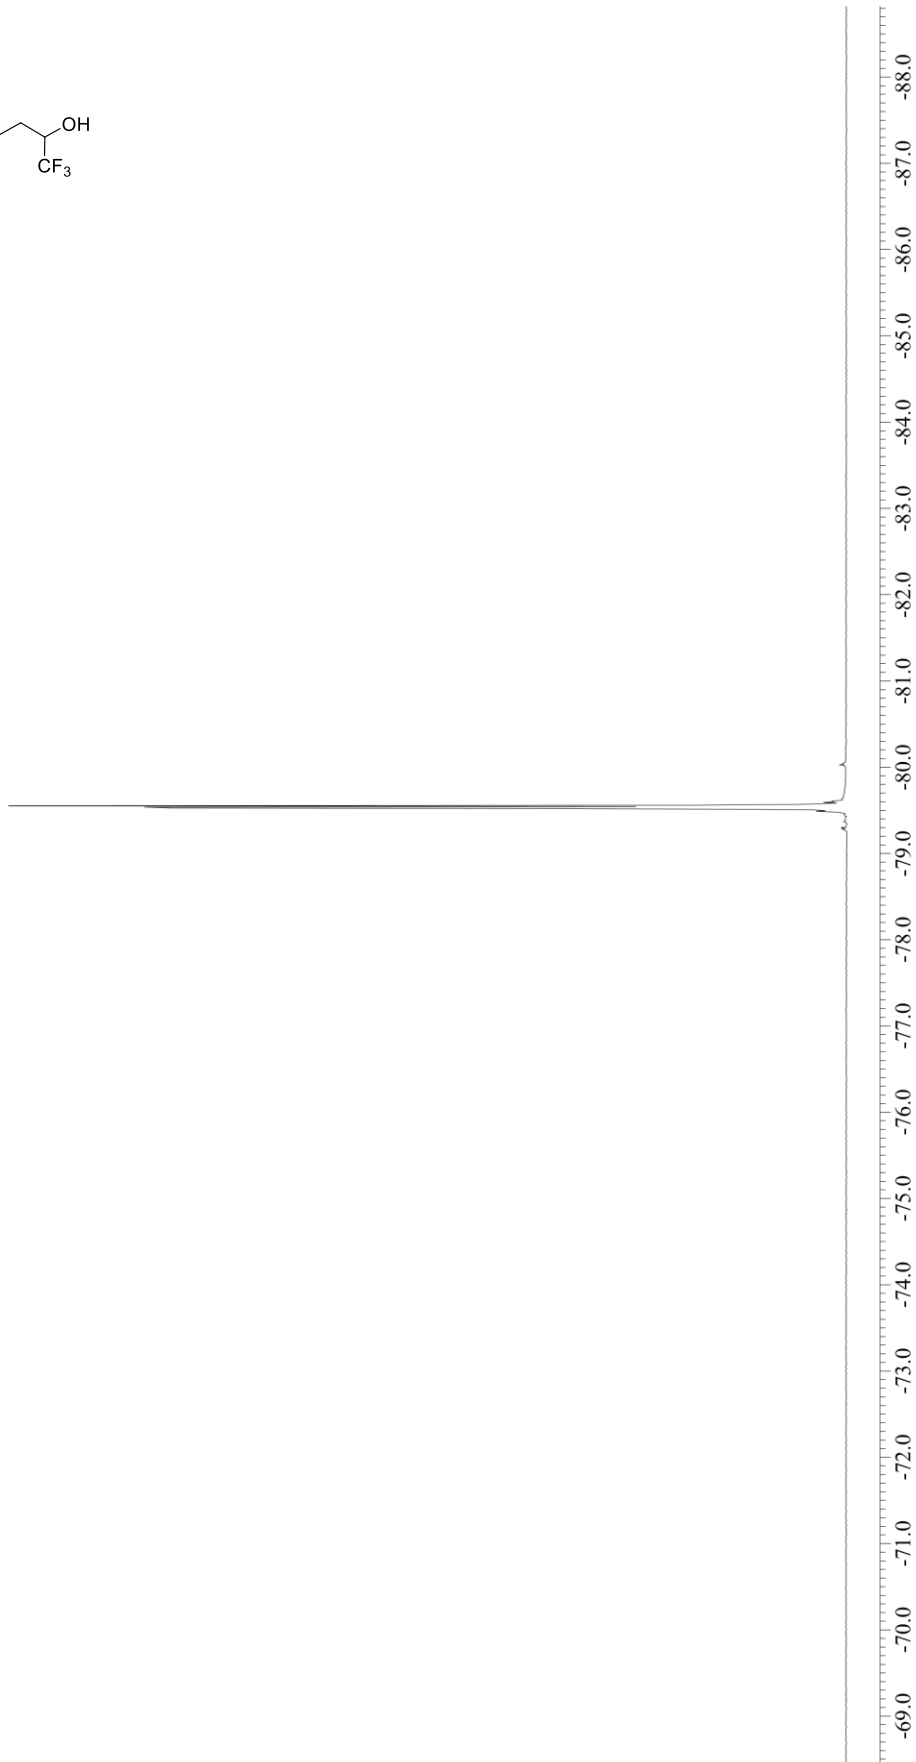

<sup>1</sup>H NMR of **9an** (CDCl<sub>3</sub>, 400 MHz, 25 °C)

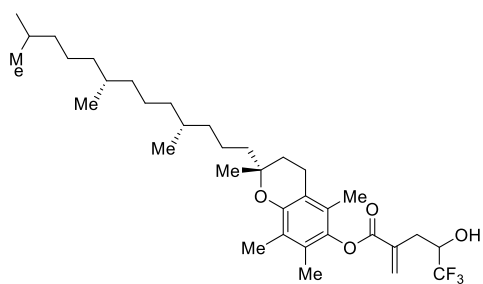

0.842  
0.863  
0.879  
1.081  
1.131  
1.147  
1.165  
1.260  
1.285  
1.388  
1.545  
1.974  
2.014  
2.107  
2.588  
2.604  
2.620  
2.761  
2.868  
2.873

4.204  
4.220  
4.235

6.014  
6.679  
7.261

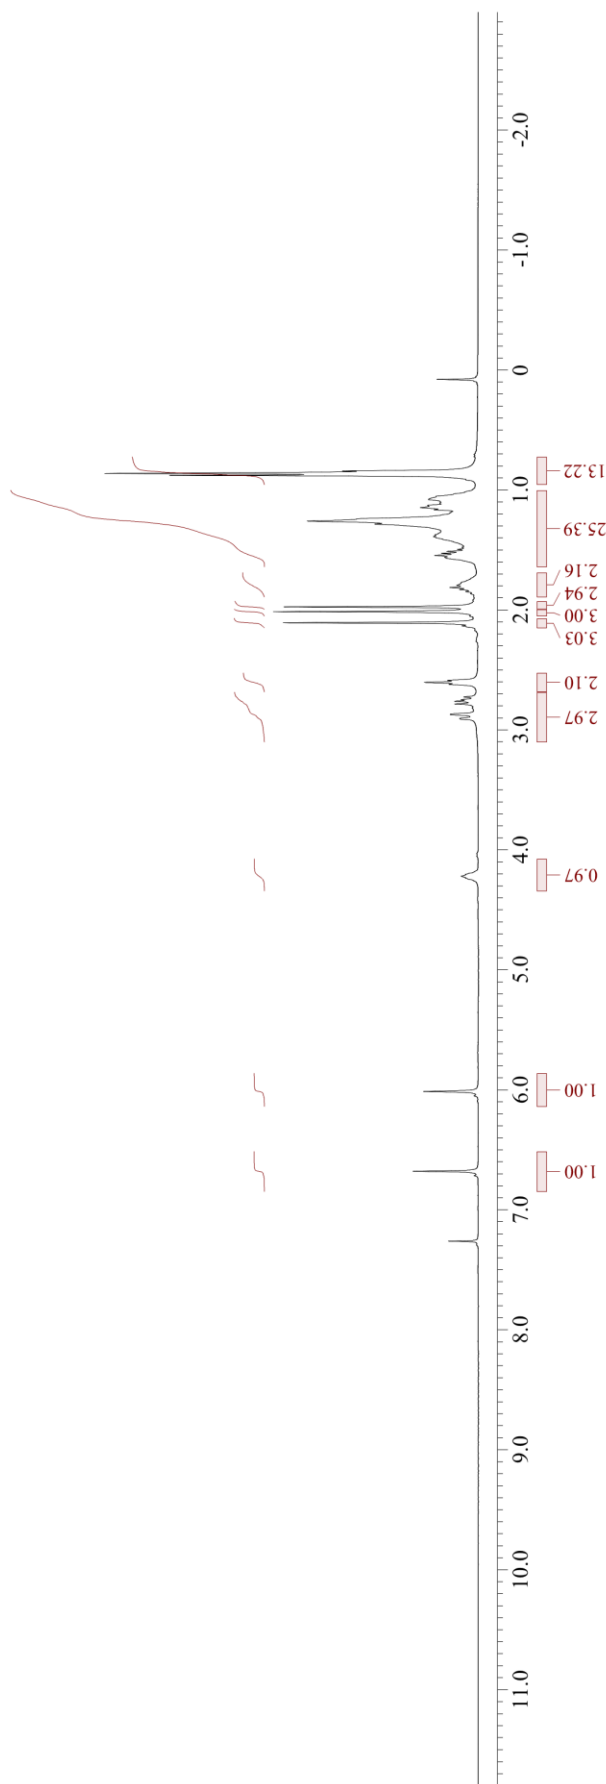

$^{13}\text{C}$  NMR of **9an** ( $\text{CDCl}_3$ , 100 MHz, 25 °C)

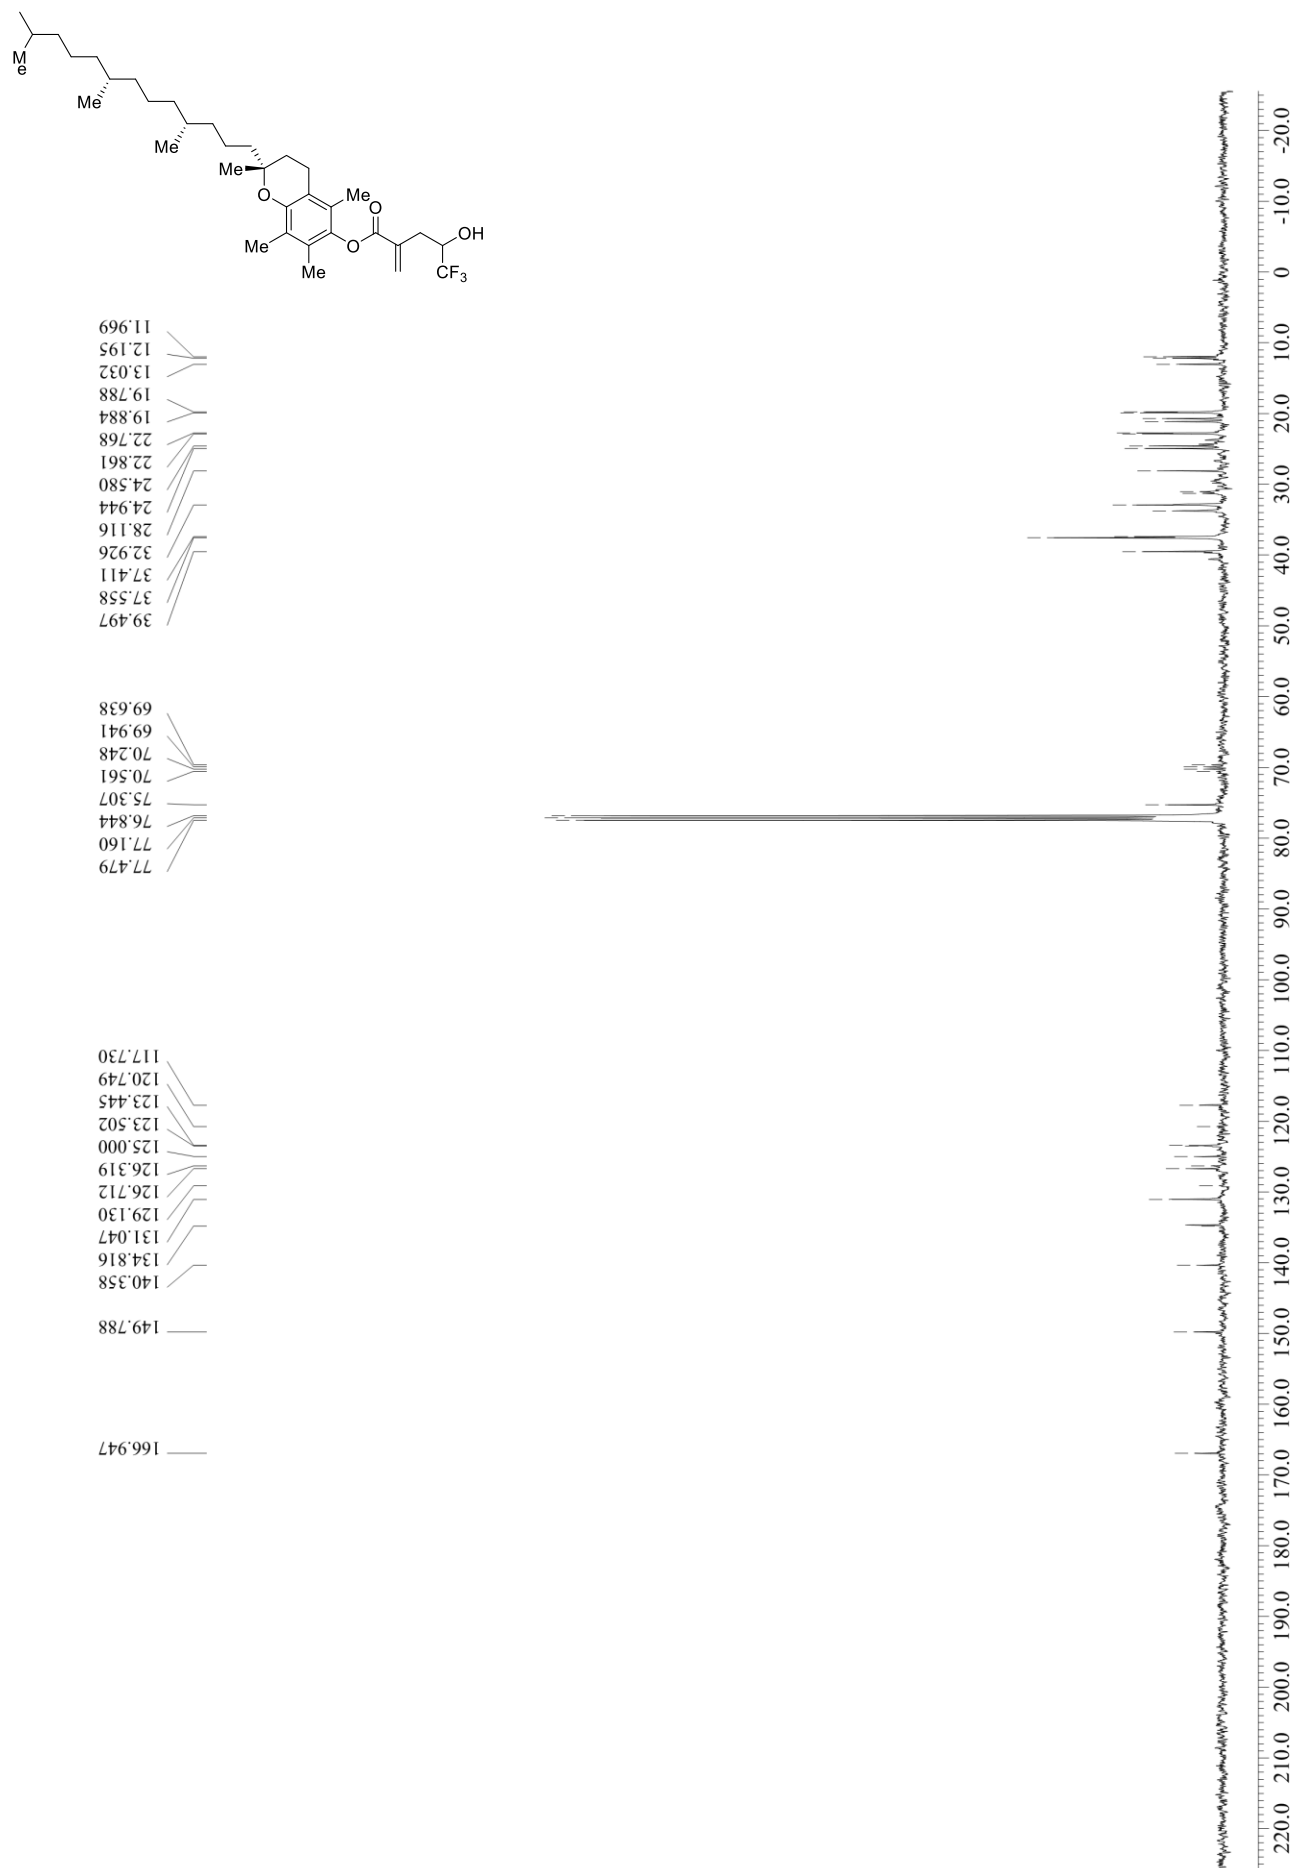



$^{19}\text{F}$  NMR of **9an** ( $\text{CDCl}_3$ , 375 MHz, 25 °C)

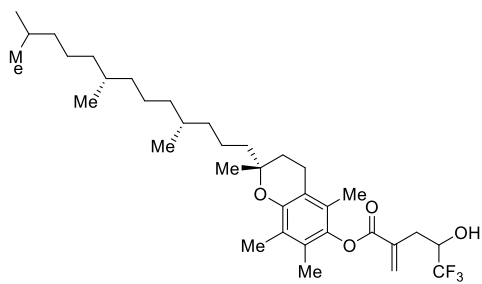

— -79.306

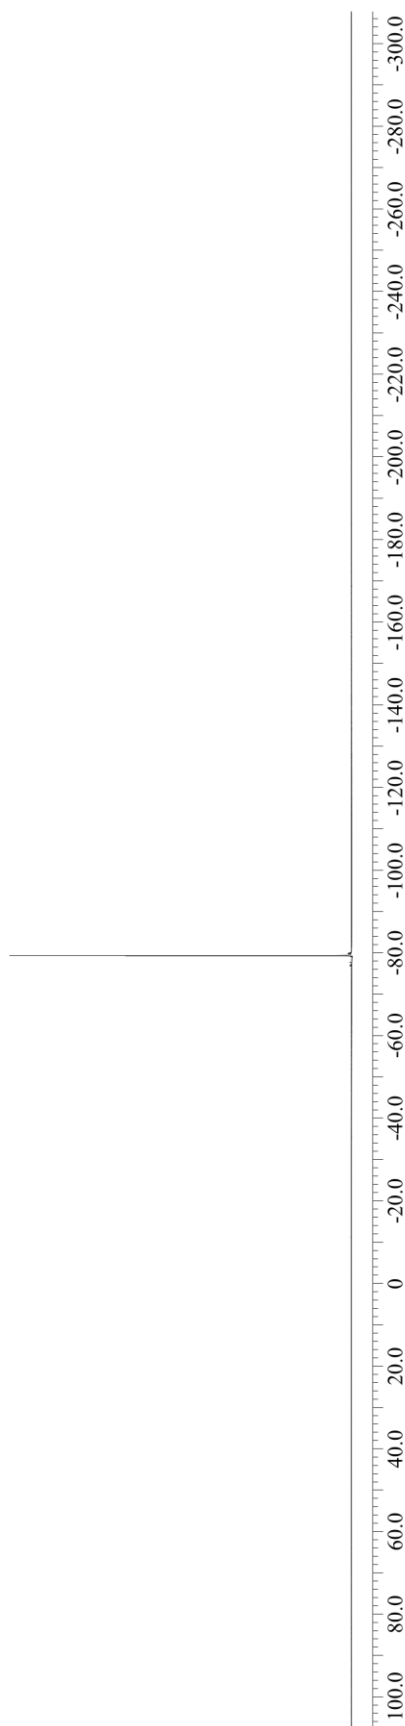

$^1\text{H}$  NMR of **9ao** ( $\text{CDCl}_3$ , 400 MHz, 25 °C)

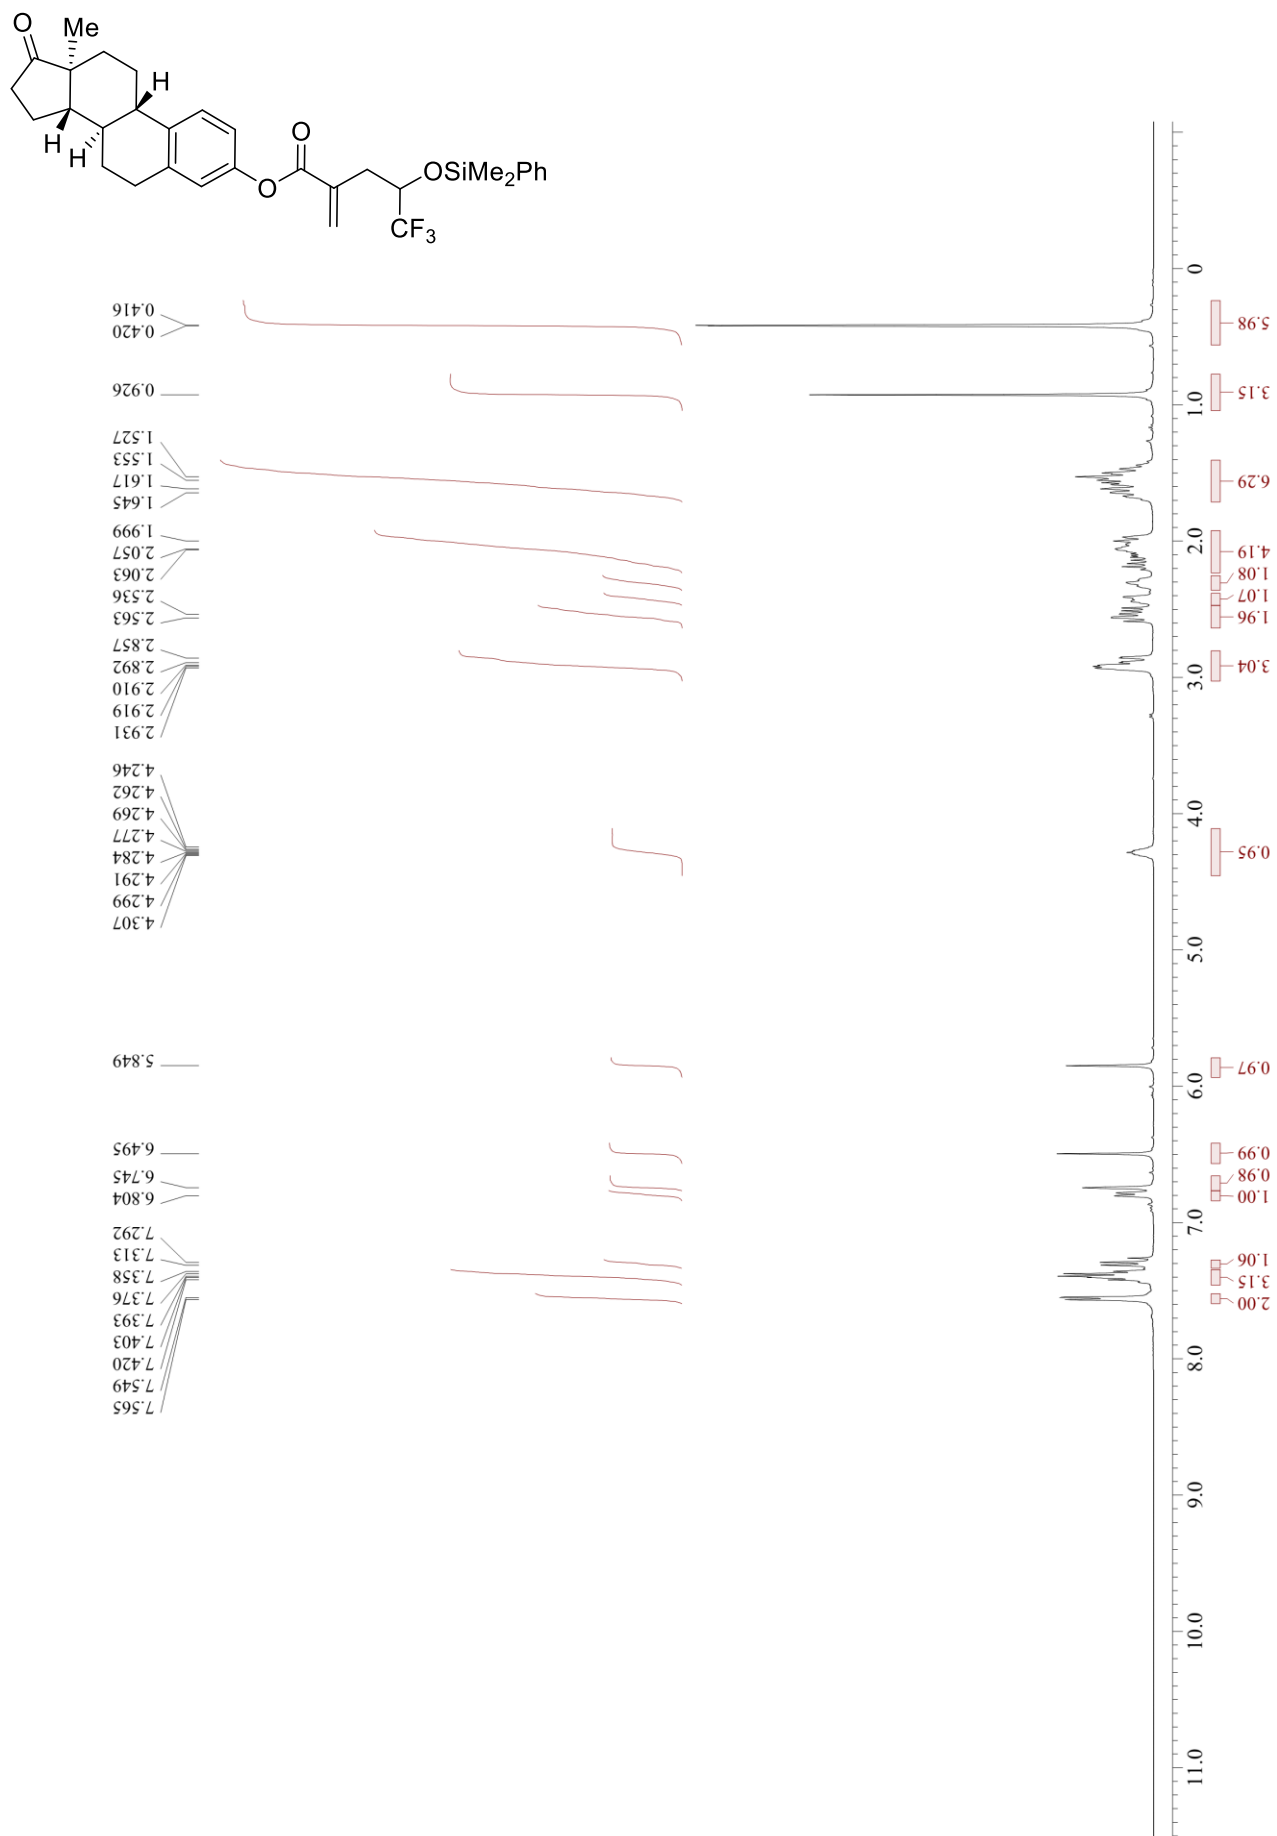

$^{13}\text{C}$  NMR of **9a0** ( $\text{CDCl}_3$ , 100 MHz, 25 °C)

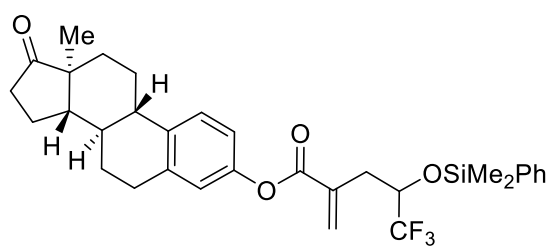

-1.390  
-1.150

13.952

21.714

25.892

26.458

29.543

31.661

34.699

35.993

38.120

44.272

48.076

50.530

69.513

69.820

70.136

70.433

76.844

77.160

77.476

118.739

120.666

121.576

123.483

126.300

126.559

128.083

128.945

130.220

131.753

133.775

134.302

136.151

137.656

148.542

165.177

220.978

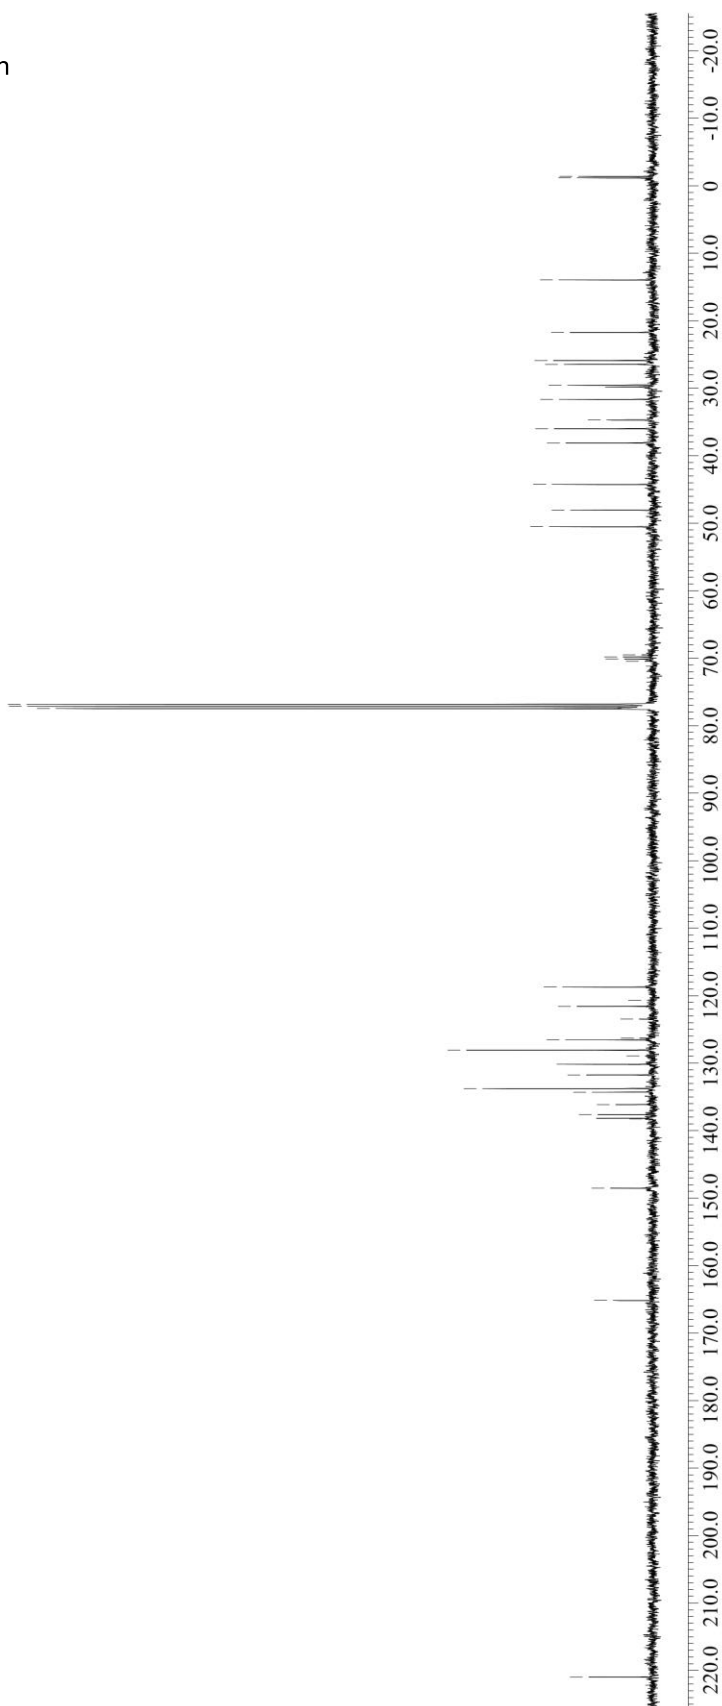

$^{19}\text{F}$  NMR of **9ao** ( $\text{CDCl}_3$ , 375 MHz, 25 °C)

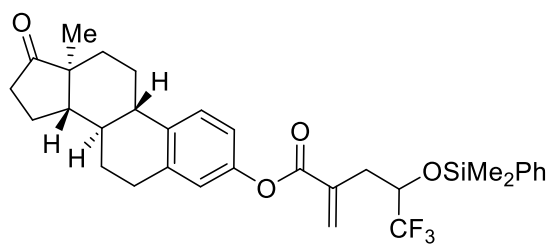

-78.364  
-78.348  
-78.332

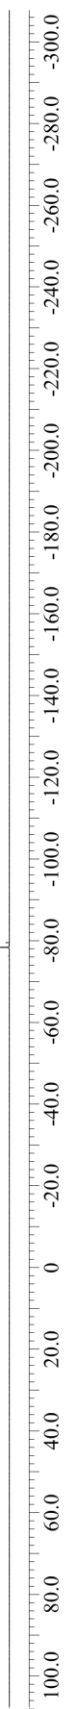

<sup>1</sup>H NMR of **9ap** (CDCl<sub>3</sub>, 400 MHz, 25 °C)

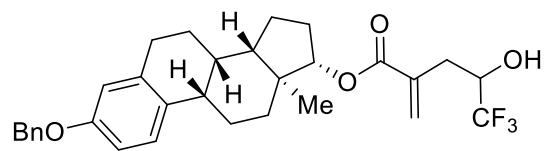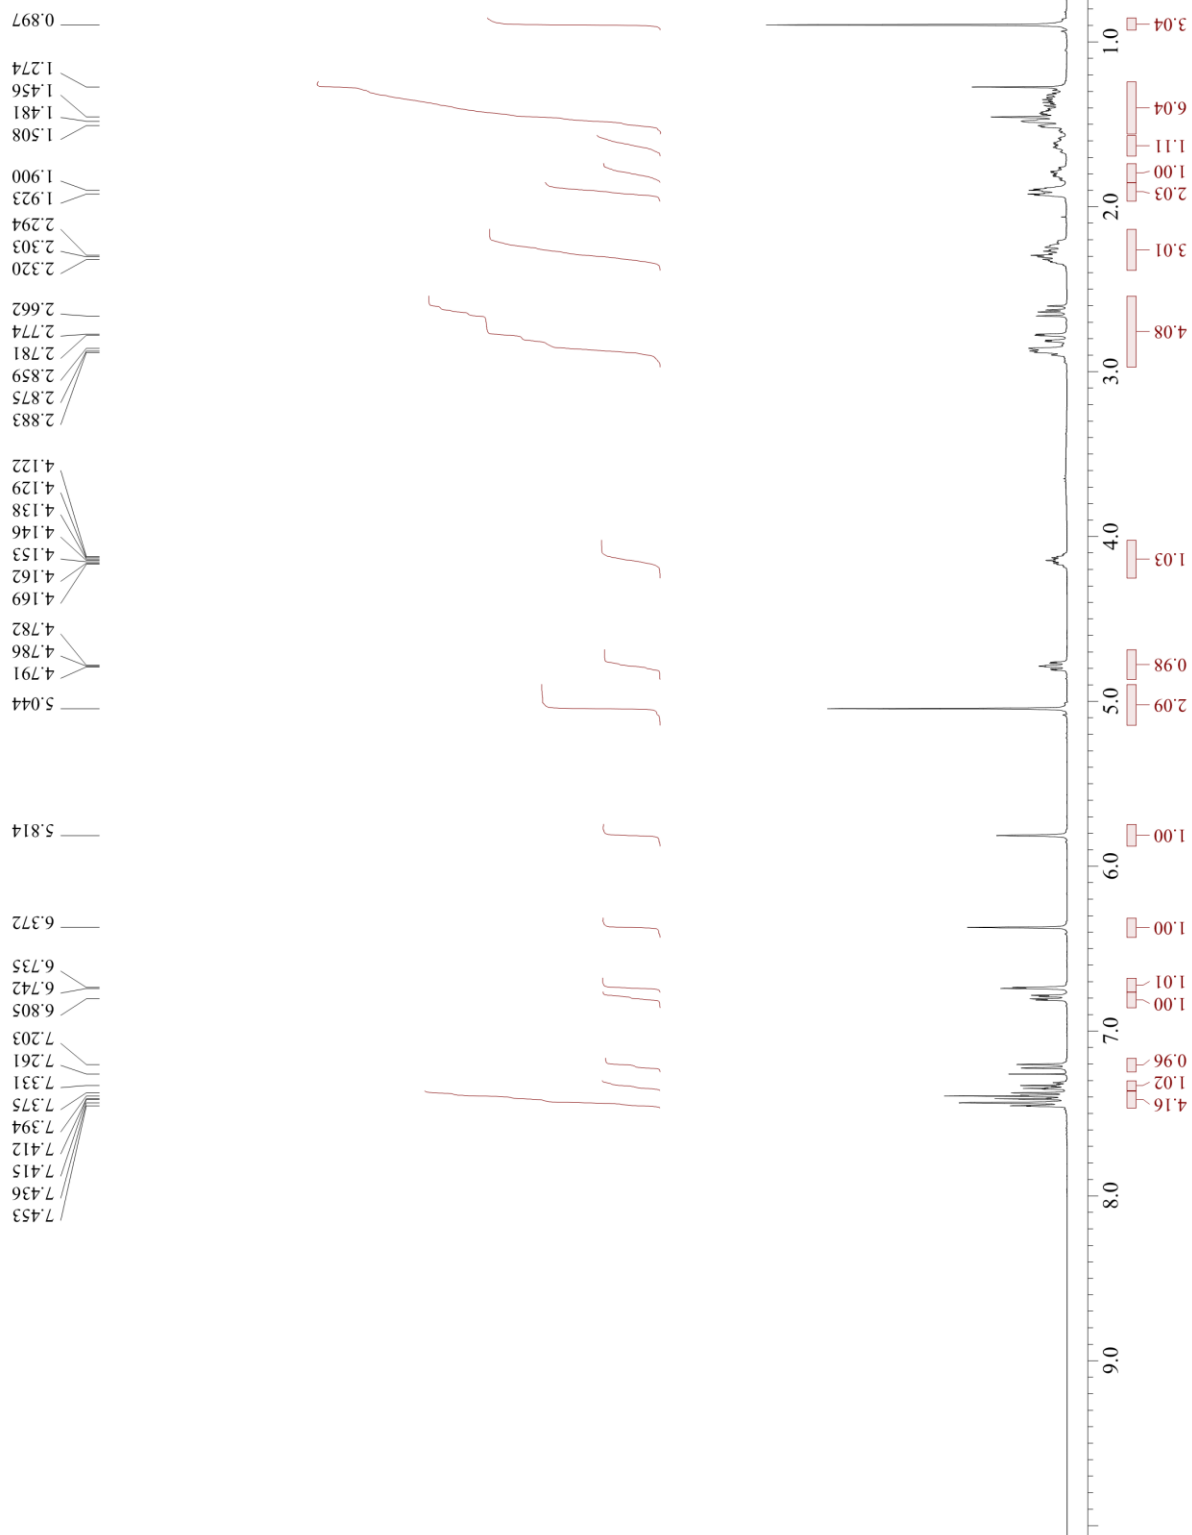

<sup>13</sup>C NMR of **9ap** (CDCl<sub>3</sub>, 100 MHz, 25 °C)

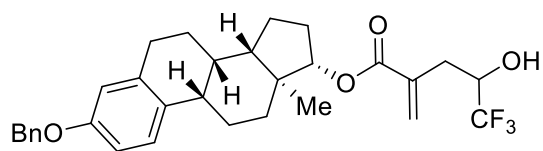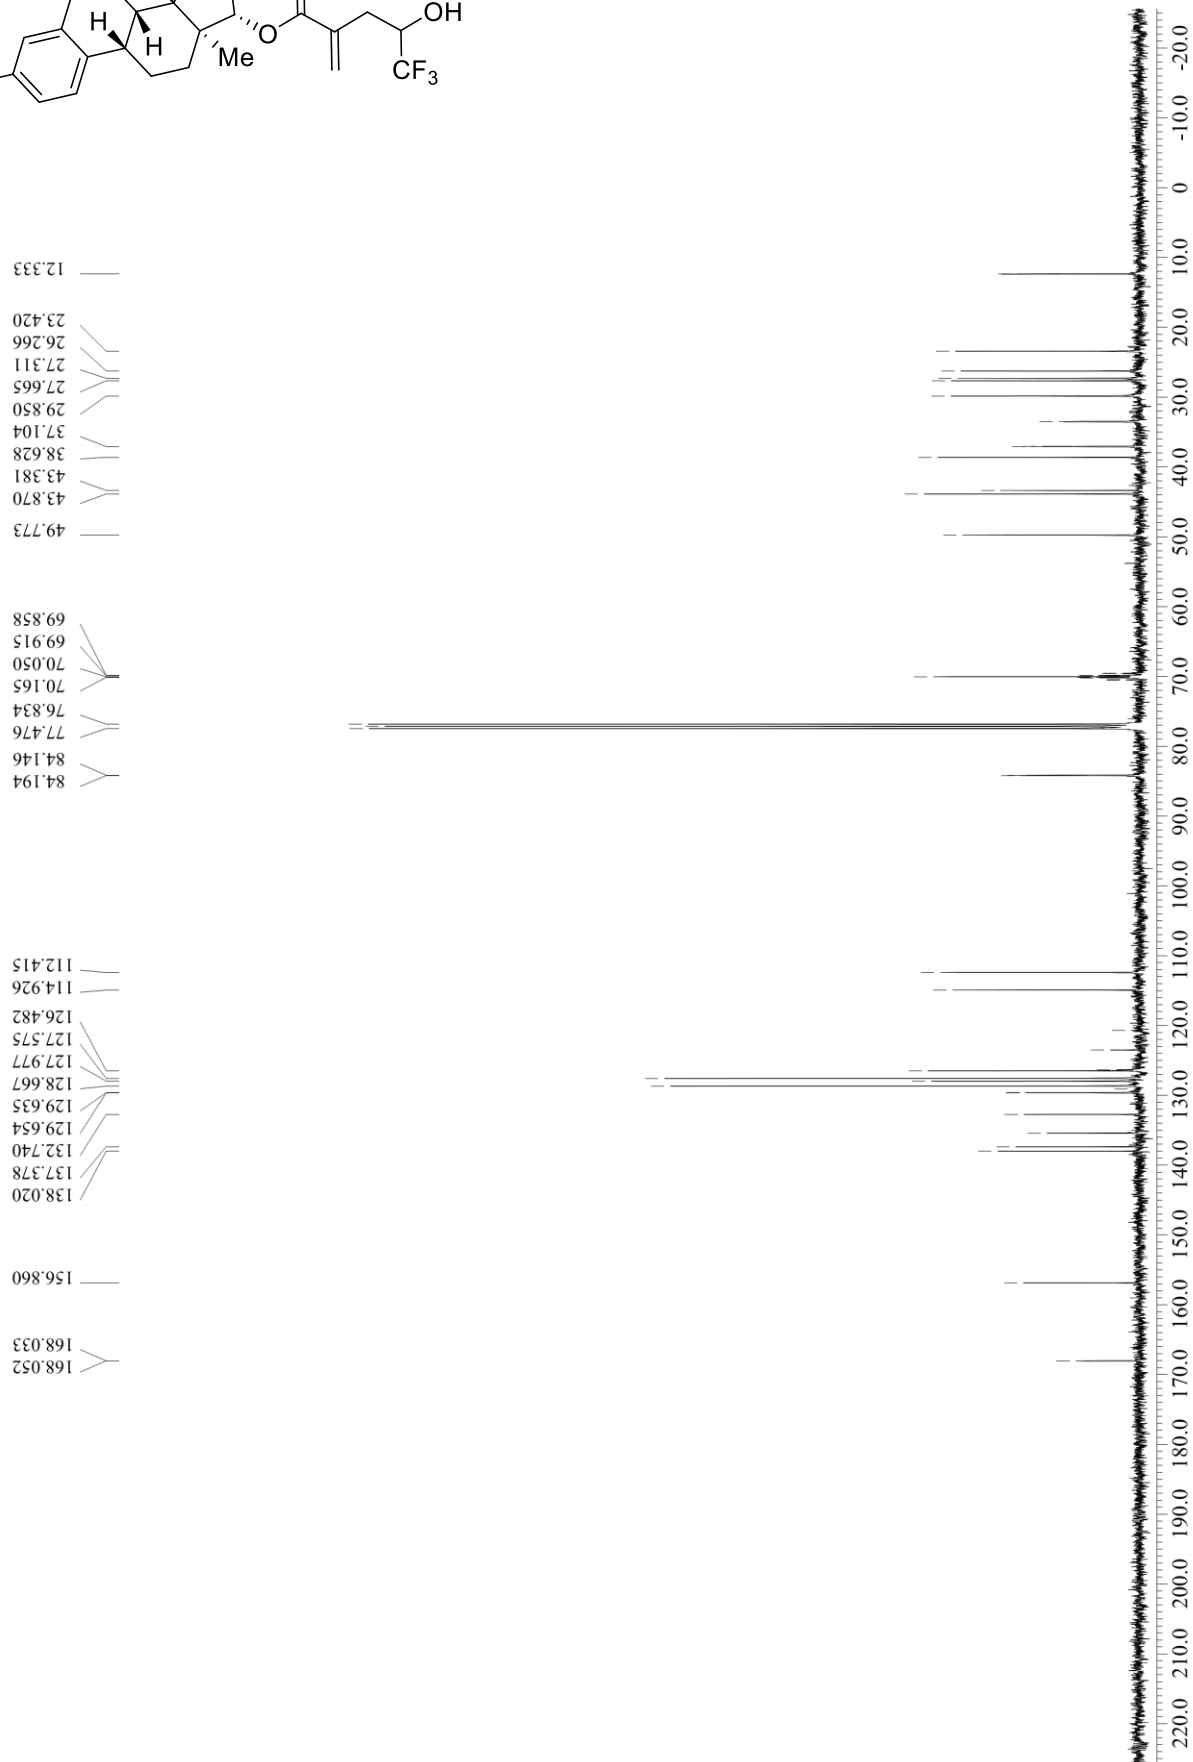

$^{19}\text{F}$  NMR of **9ap** ( $\text{CDCl}_3$ , 375 MHz, 25 °C)

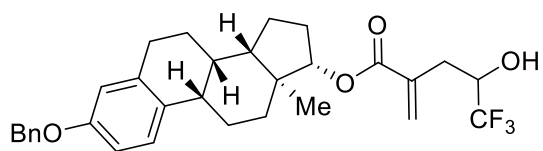

-79.489  
-79.473  
-79.425  
-79.409

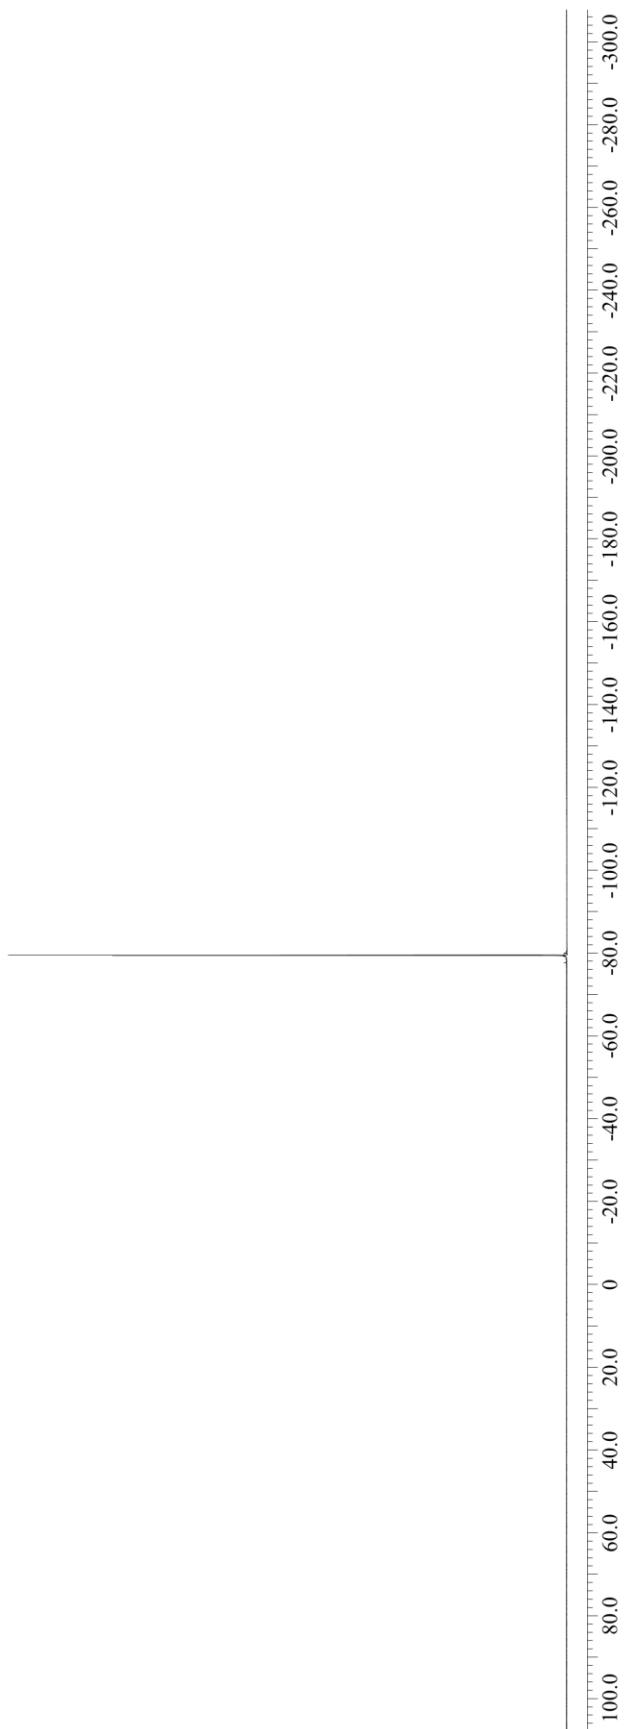

<sup>1</sup>H NMR of **11a** (CDCl<sub>3</sub>, 400 MHz, 25 °C)

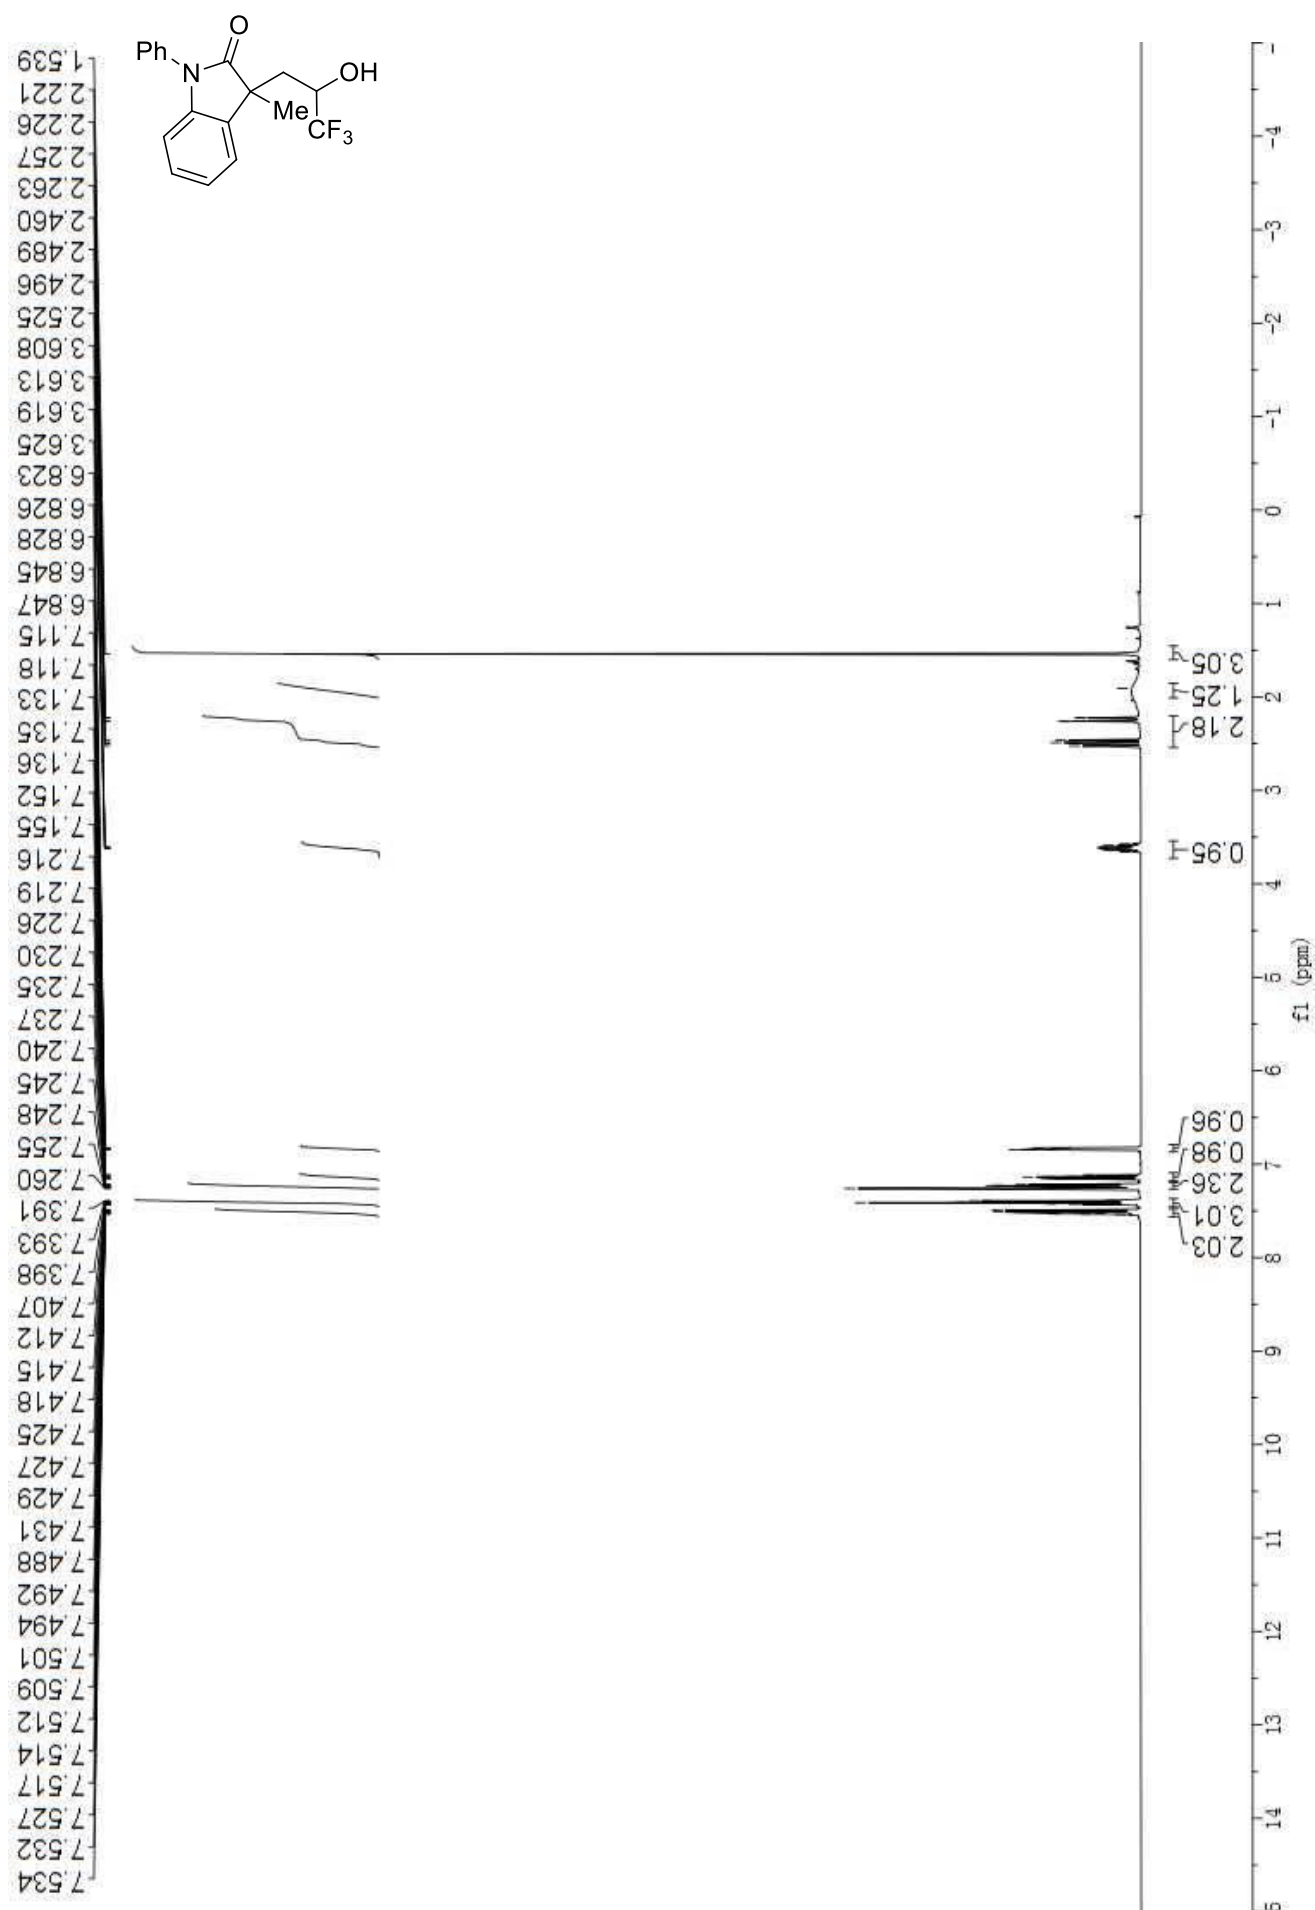



$^{13}\text{C}$  NMR of **11a** ( $\text{CDCl}_3$ , 150 MHz, 25  $^\circ\text{C}$ )

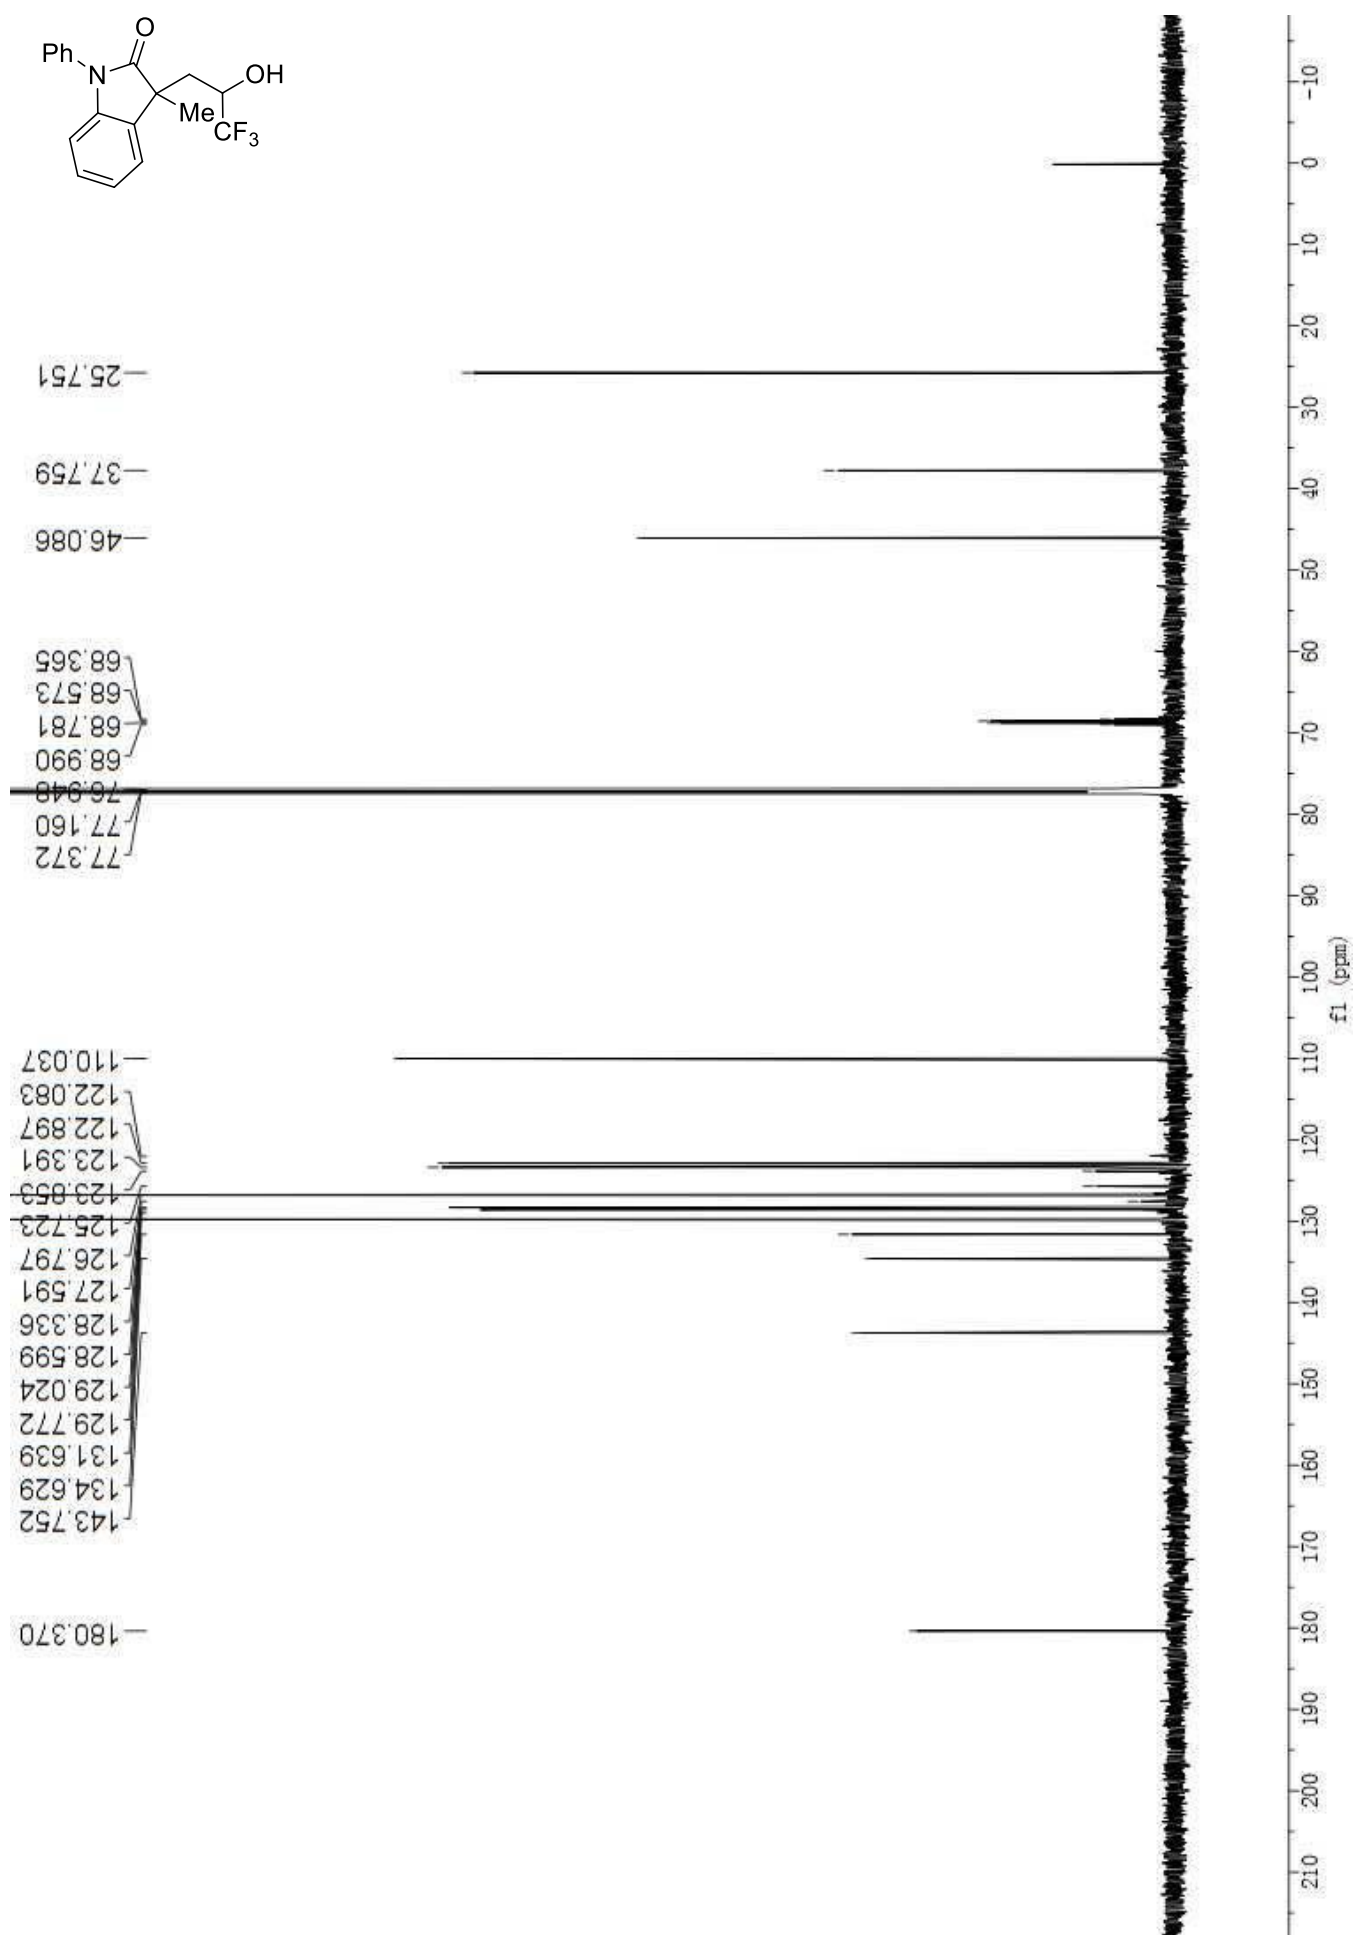

$^{19}\text{F}$  NMR of **11a** ( $\text{CDCl}_3$ , 375 MHz, 25 °C)

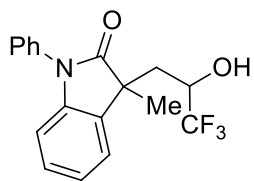

-79.984  
-79.965

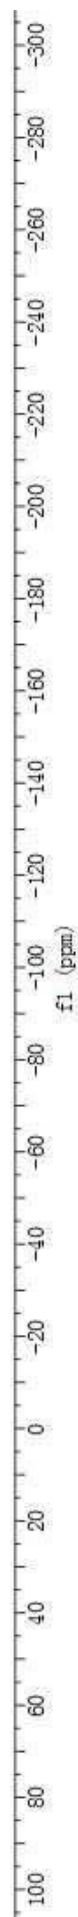

<sup>1</sup>H NMR of **11b** (CDCl<sub>3</sub>, 400 MHz, 25 °C)

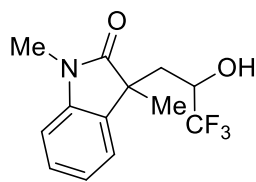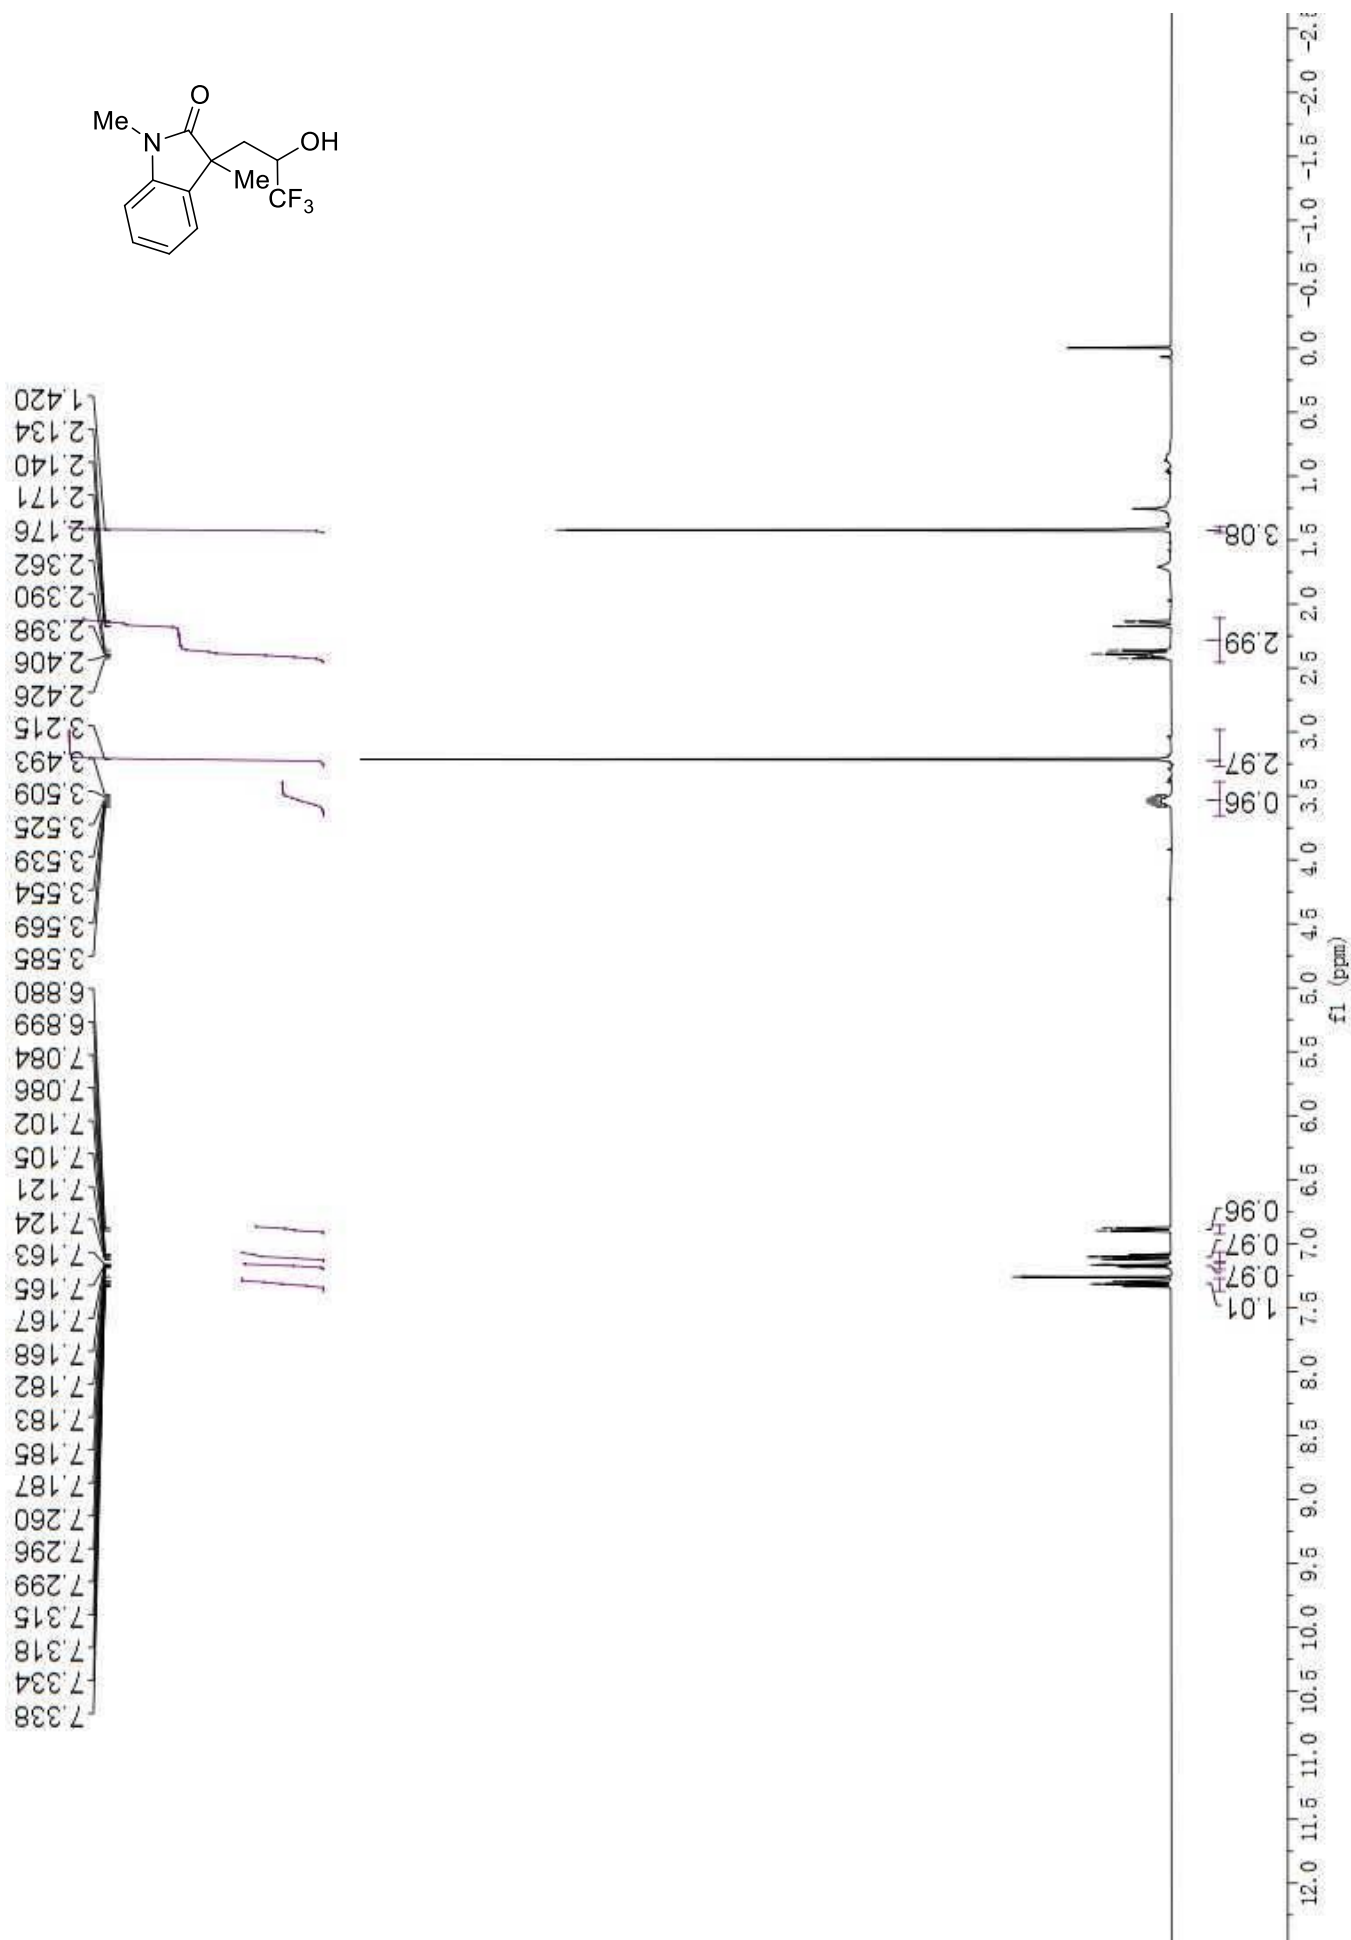

$^{13}\text{C}$  NMR of **11b** ( $\text{CDCl}_3$ , 150 MHz, 25 °C)

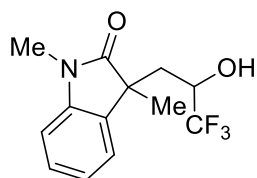

25.347  
26.575  
27.316  
37.387  
38.051  
46.034

68.044  
68.253  
68.460  
68.668  
76.949  
77.160  
77.372

108.762  
119.921  
122.001  
122.613  
123.008  
123.870  
125.740  
127.610  
128.650  
132.102  
143.560

180.940

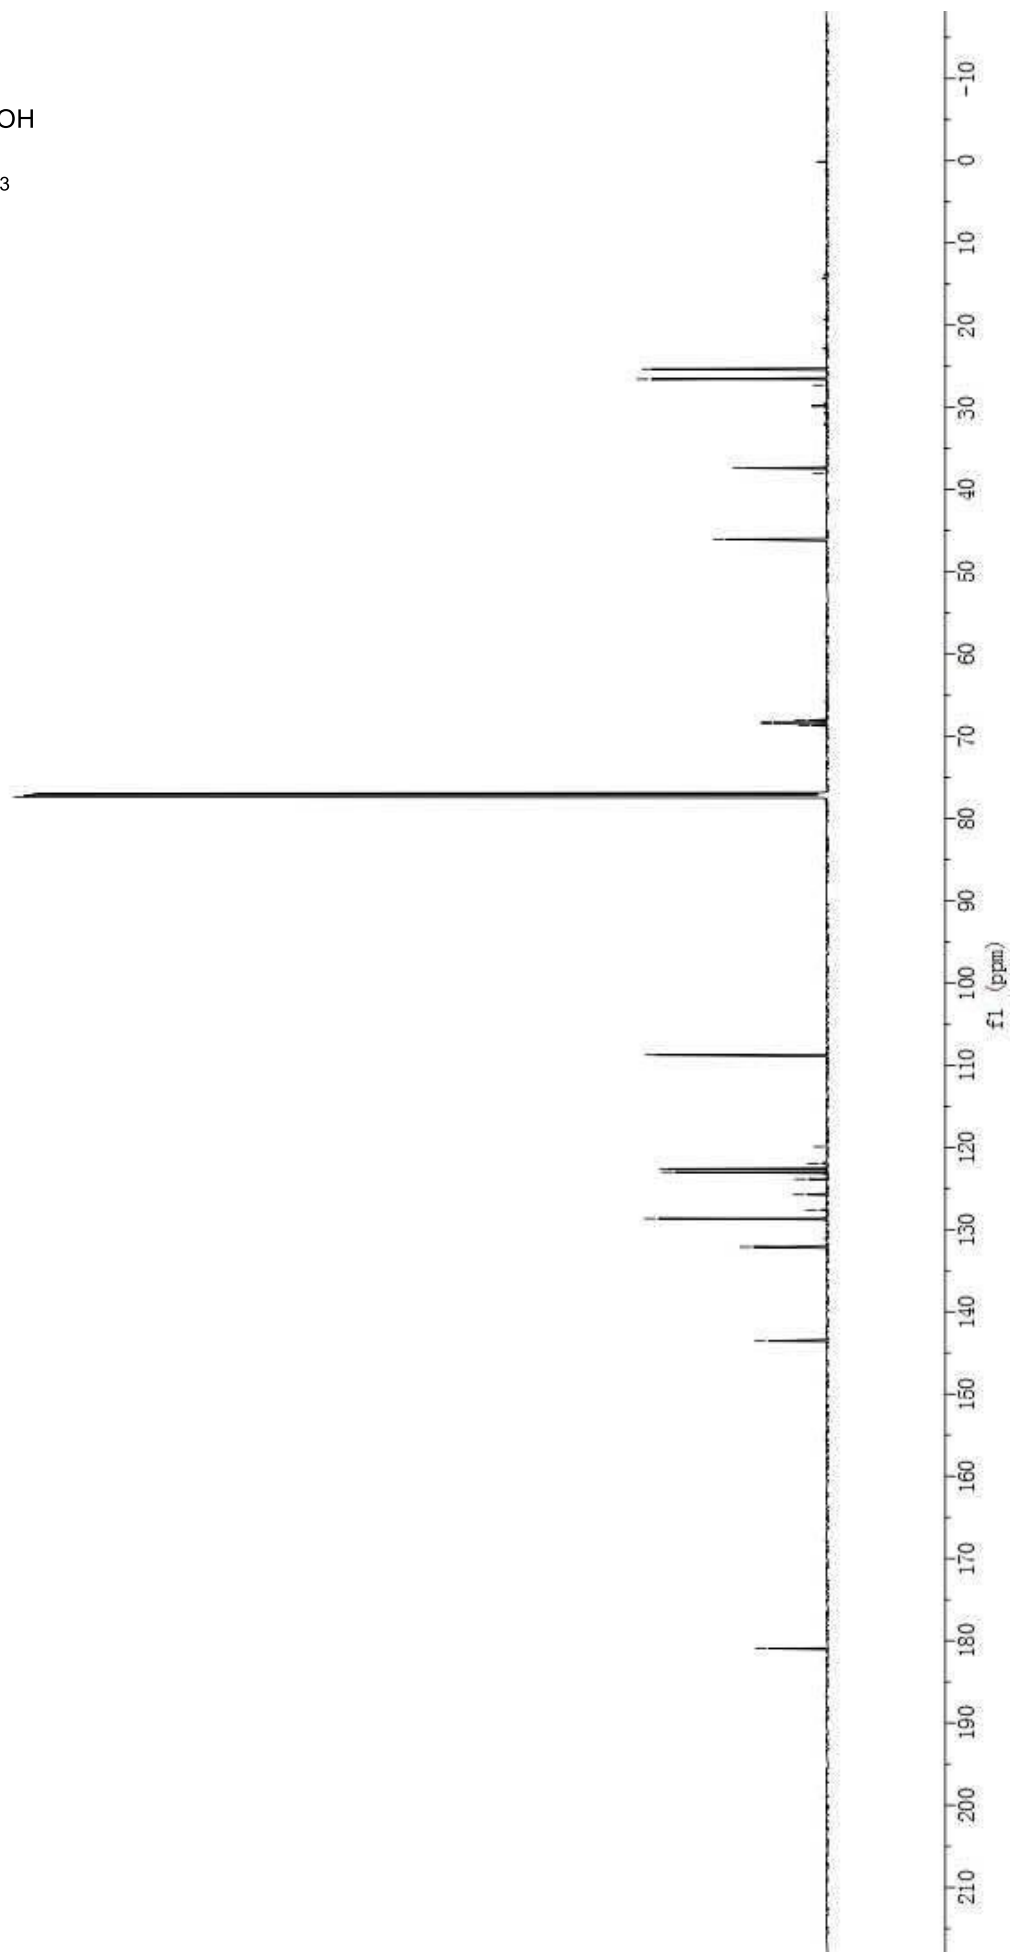

$^{19}\text{F}$  NMR of **11b** ( $\text{CDCl}_3$ , 375 MHz, 25  $^\circ\text{C}$ )

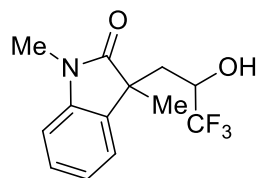

80.136  
80.156

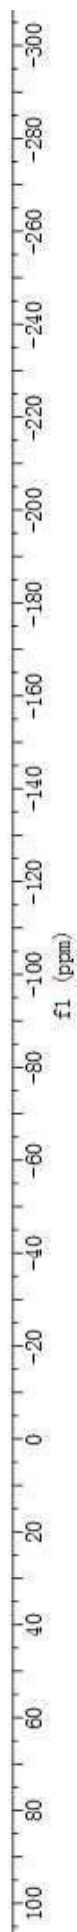

<sup>1</sup>H NMR of **11c** (CDCl<sub>3</sub>, 400 MHz, 25 °C)

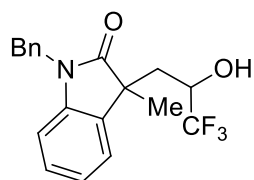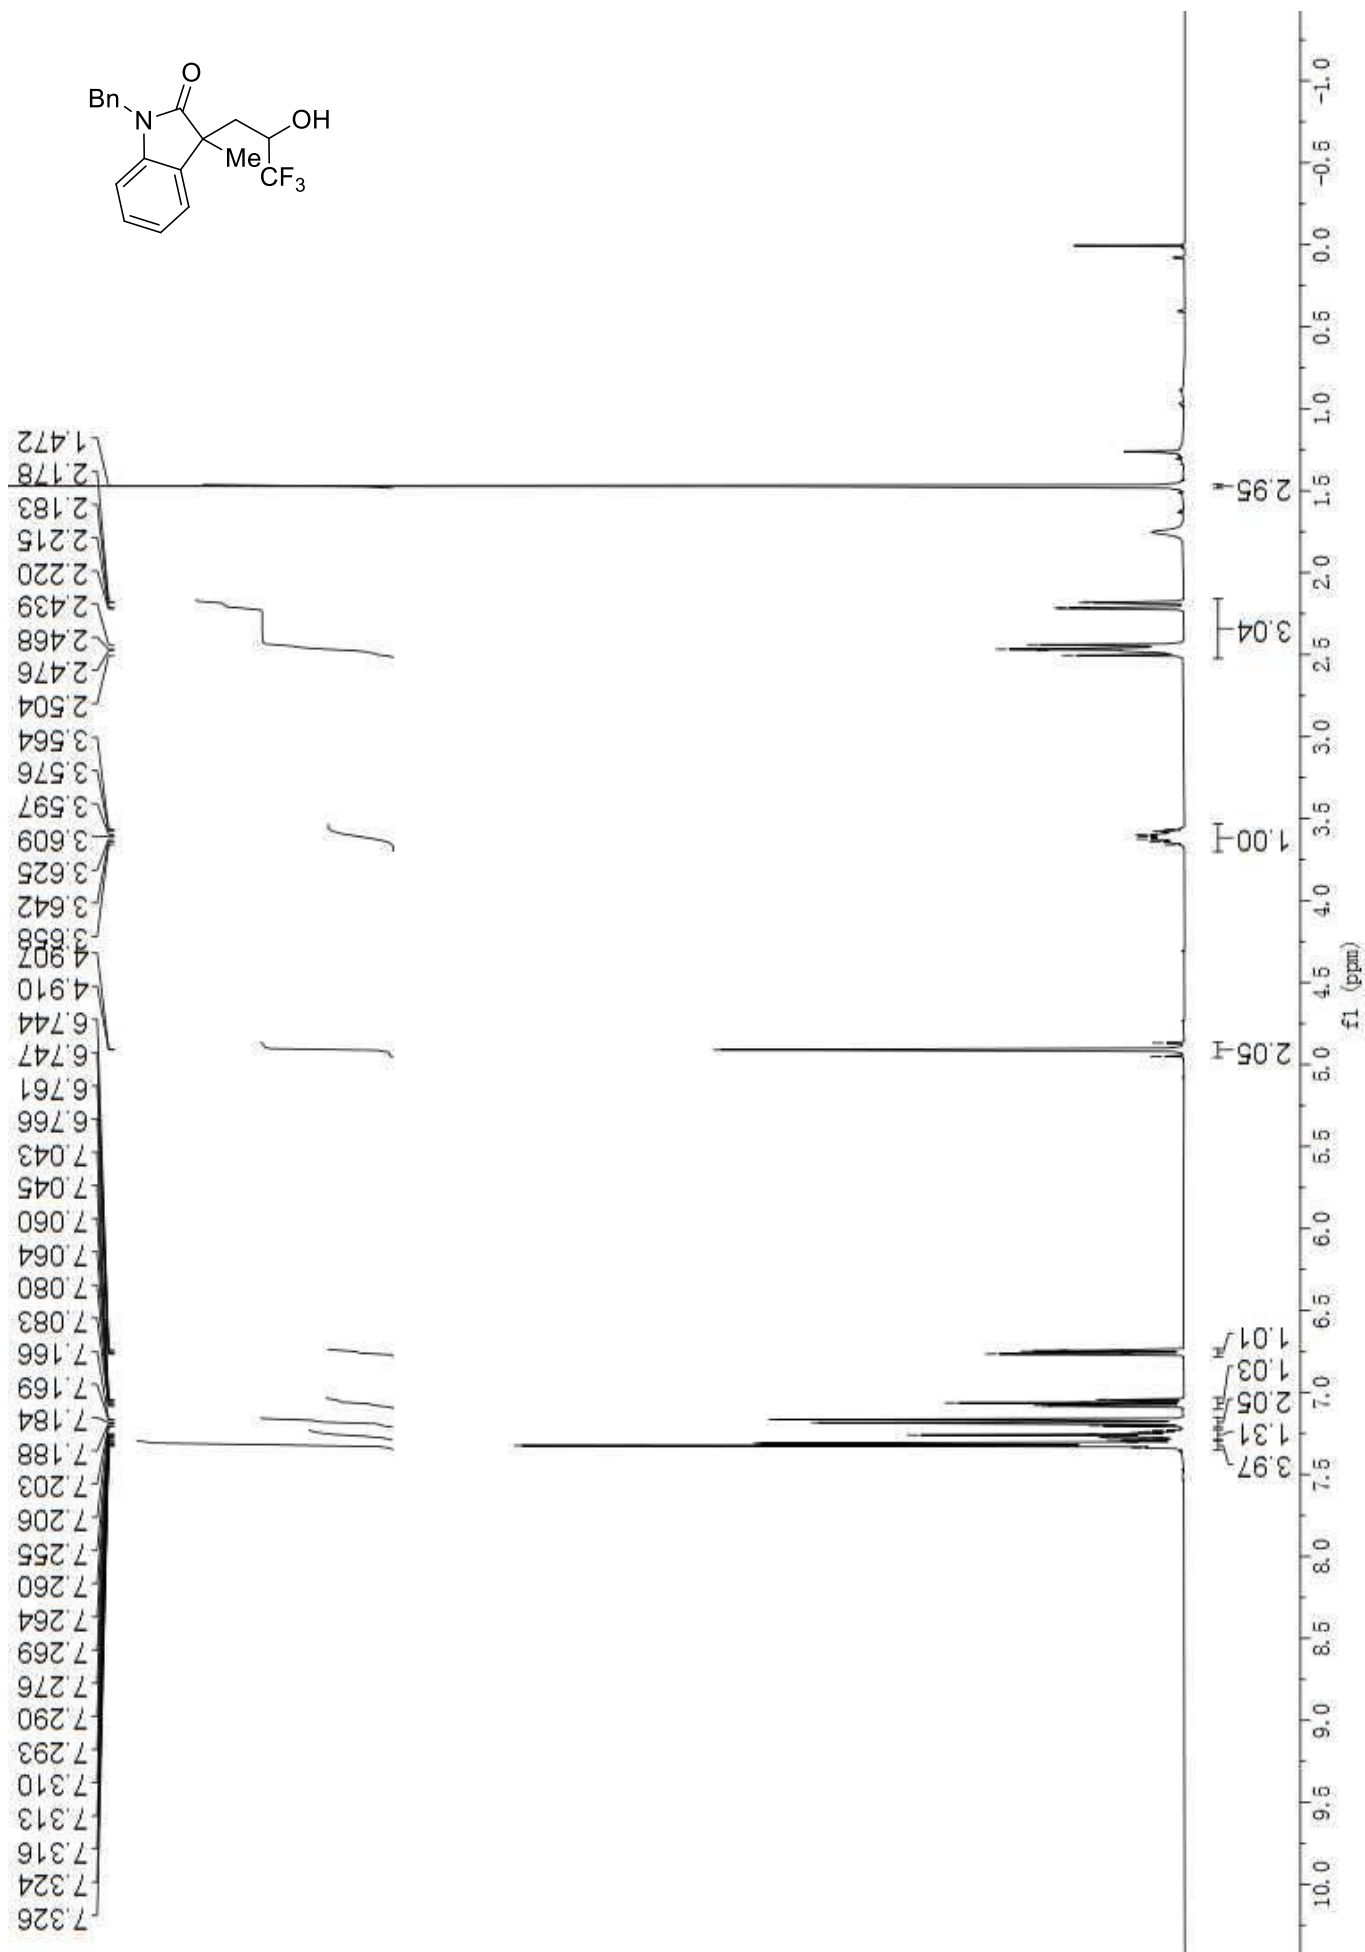

$^{13}\text{C}$  NMR of **11c** ( $\text{CDCl}_3$ , 150 MHz, 25 °C)

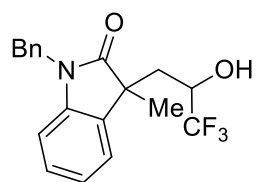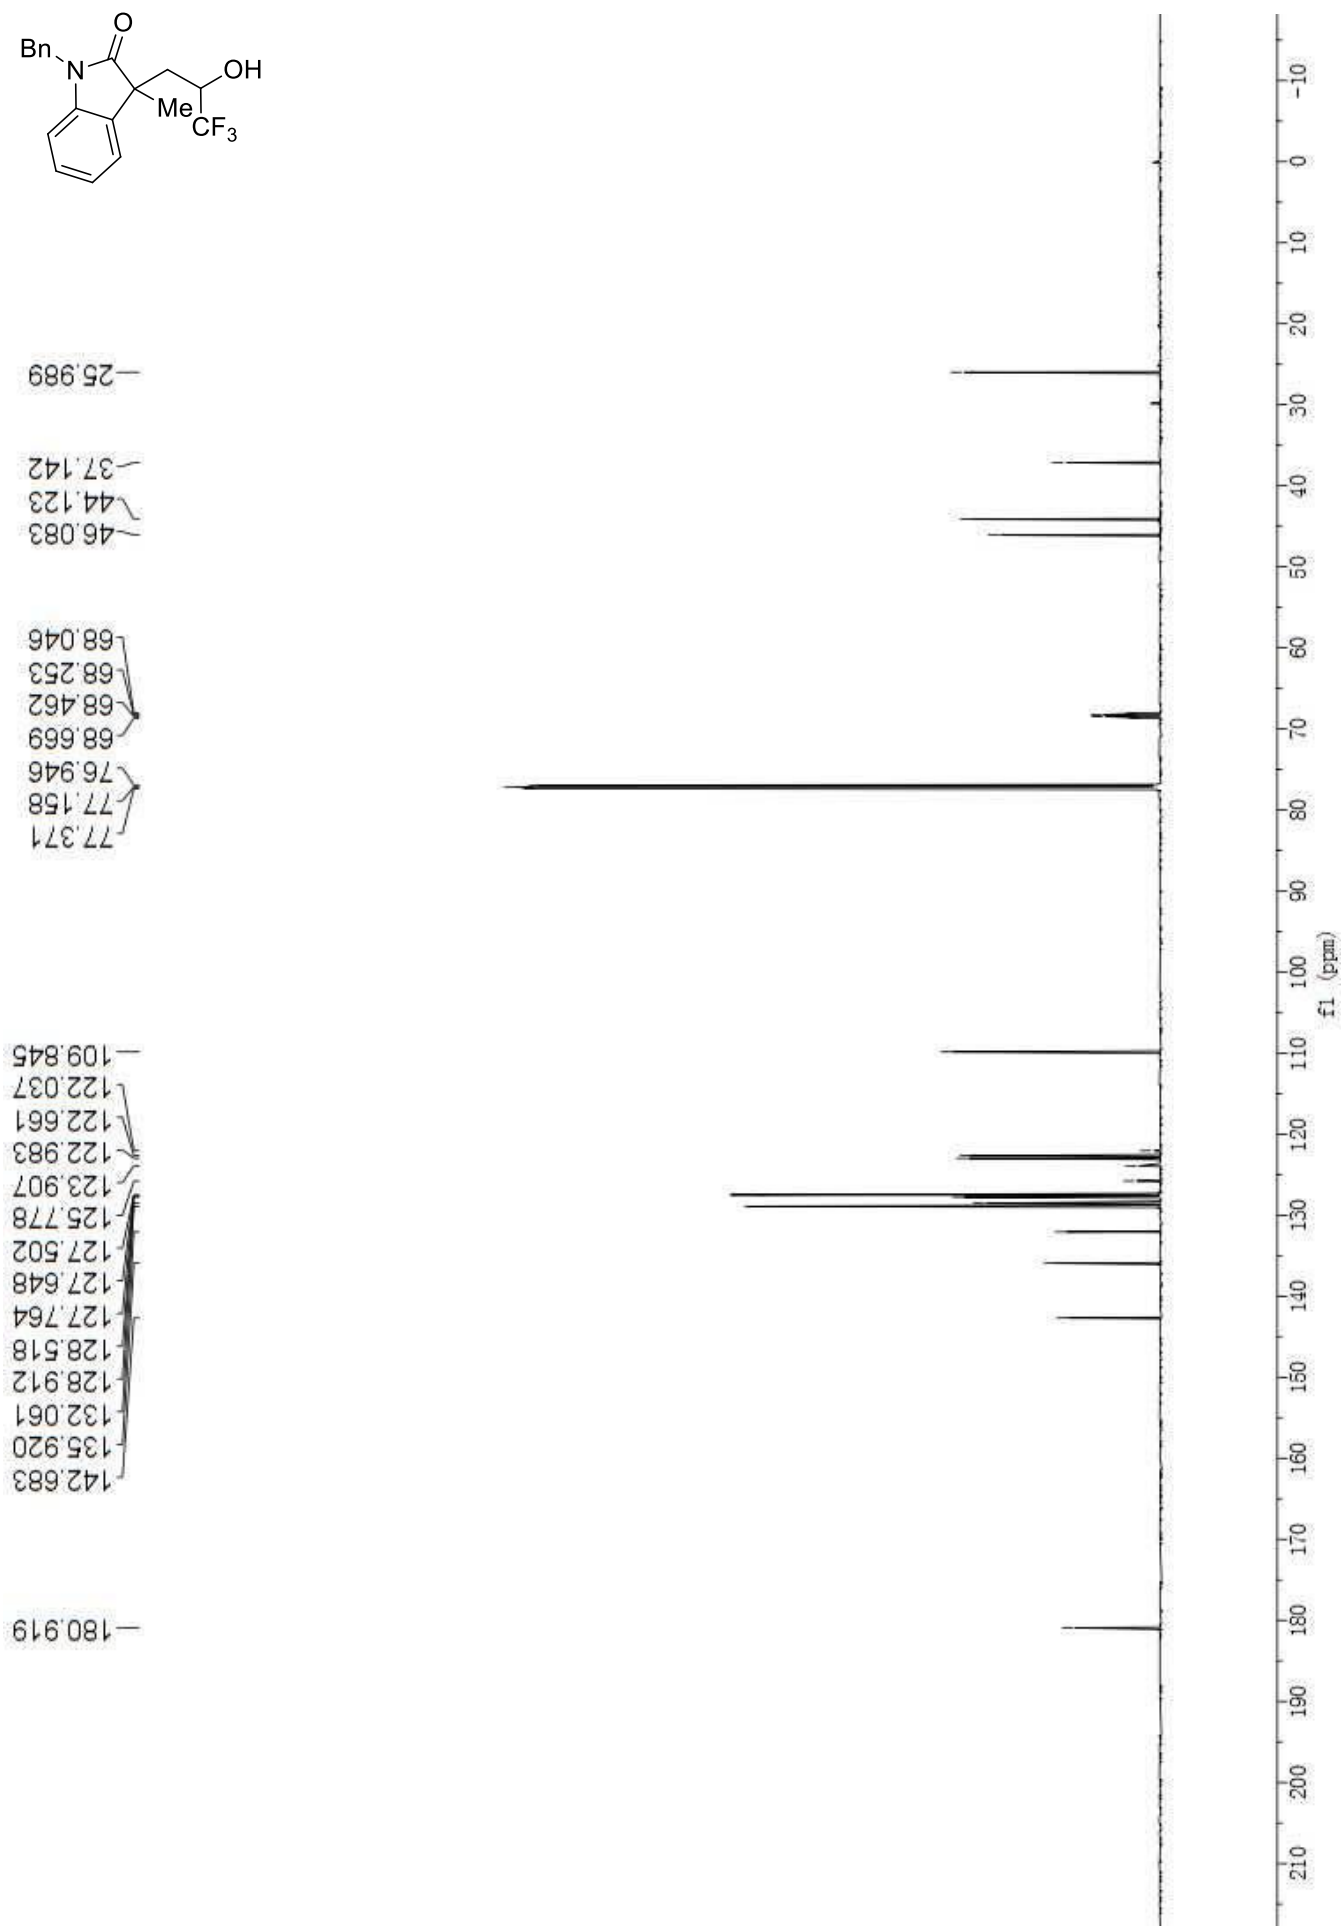

$^{19}\text{F}$  NMR of **11c** ( $\text{CDCl}_3$ , 375 MHz, 25 °C)

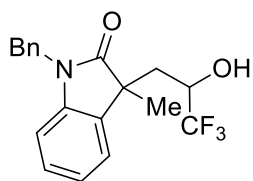

-79.997  
-80.017

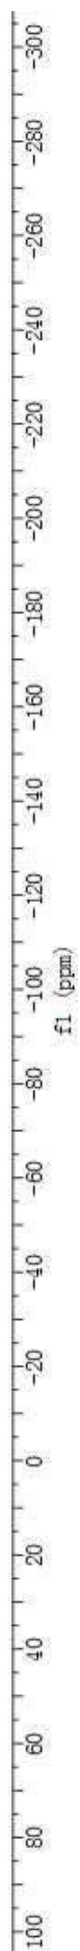



$^1\text{H}$  NMR of **11d** ( $\text{CDCl}_3$ , 400 MHz, 25 °C)

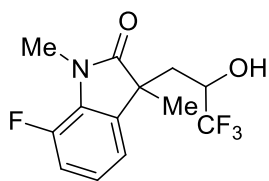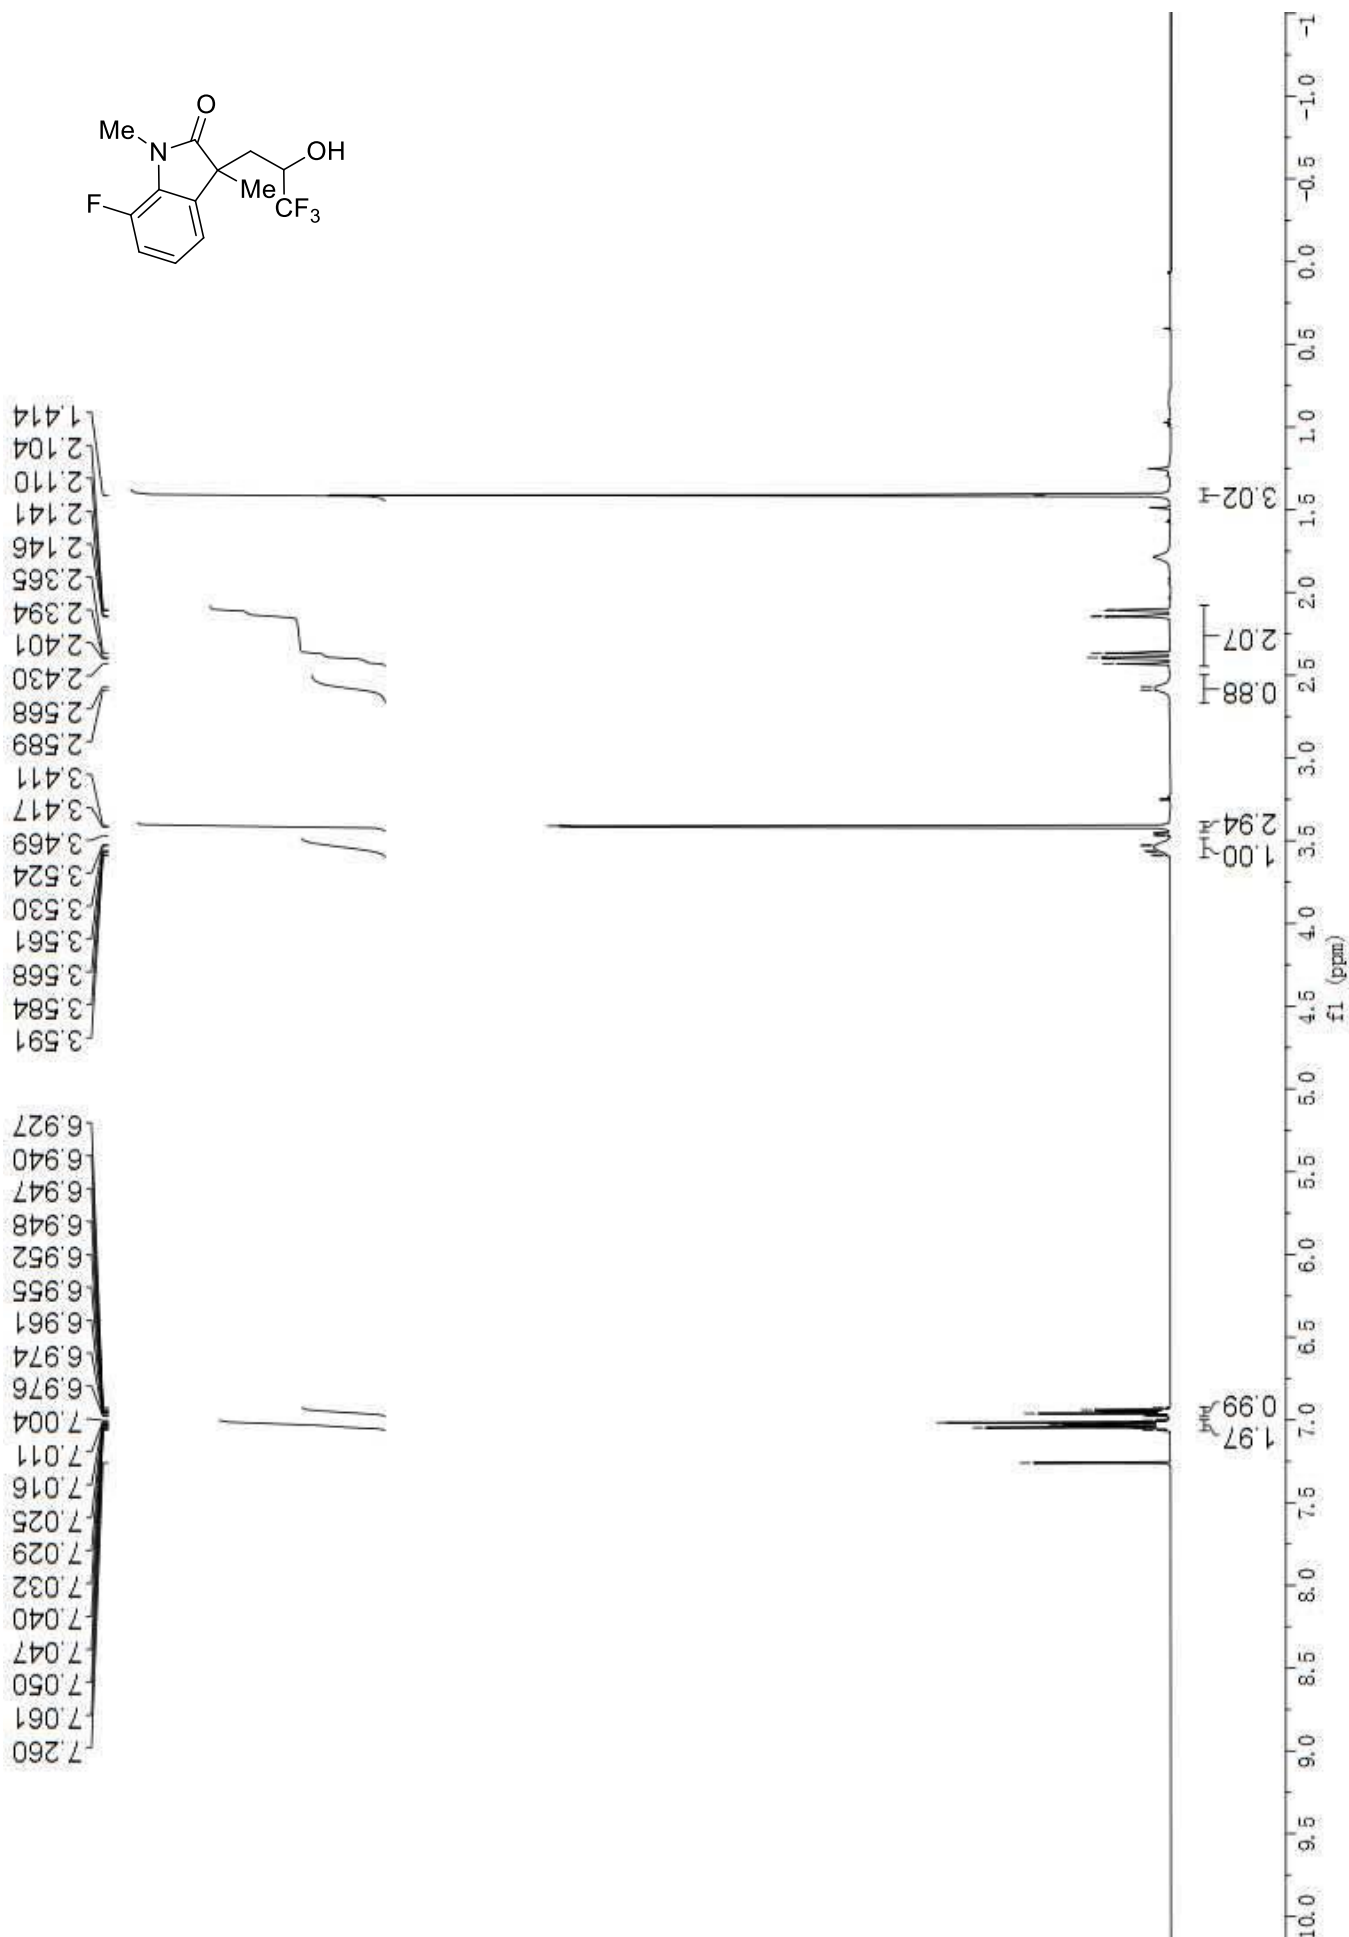

$^{13}\text{C}$  NMR of **11d** ( $\text{CDCl}_3$ , 150 MHz, 25  $^\circ\text{C}$ )

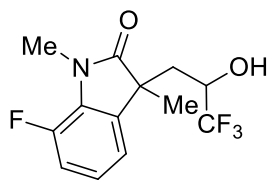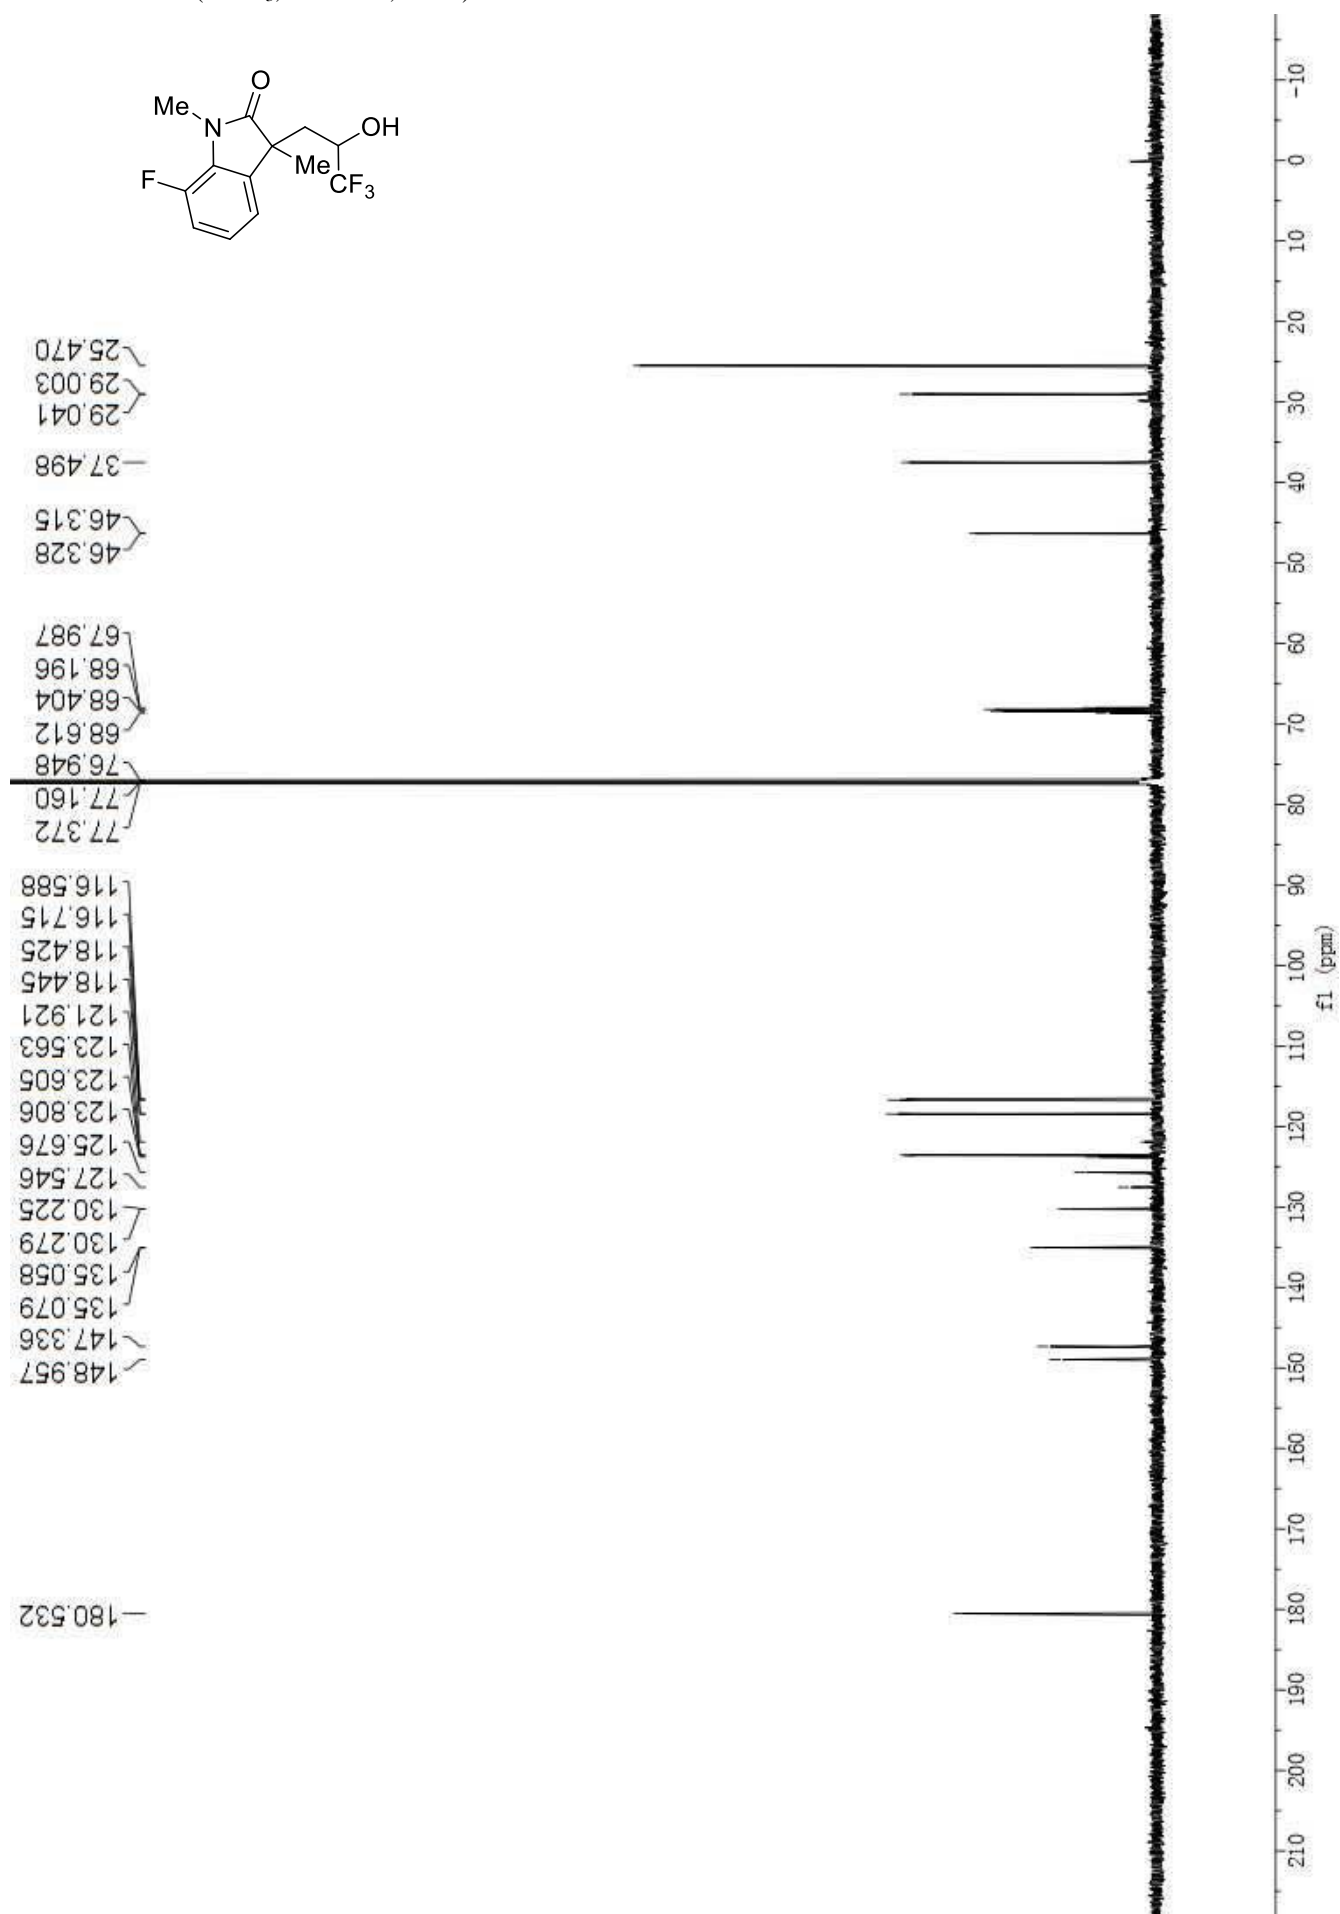

$^{19}\text{F}$  NMR of **11d** ( $\text{CDCl}_3$ , 375 MHz, 25  $^\circ\text{C}$ )

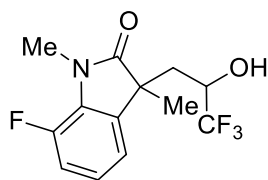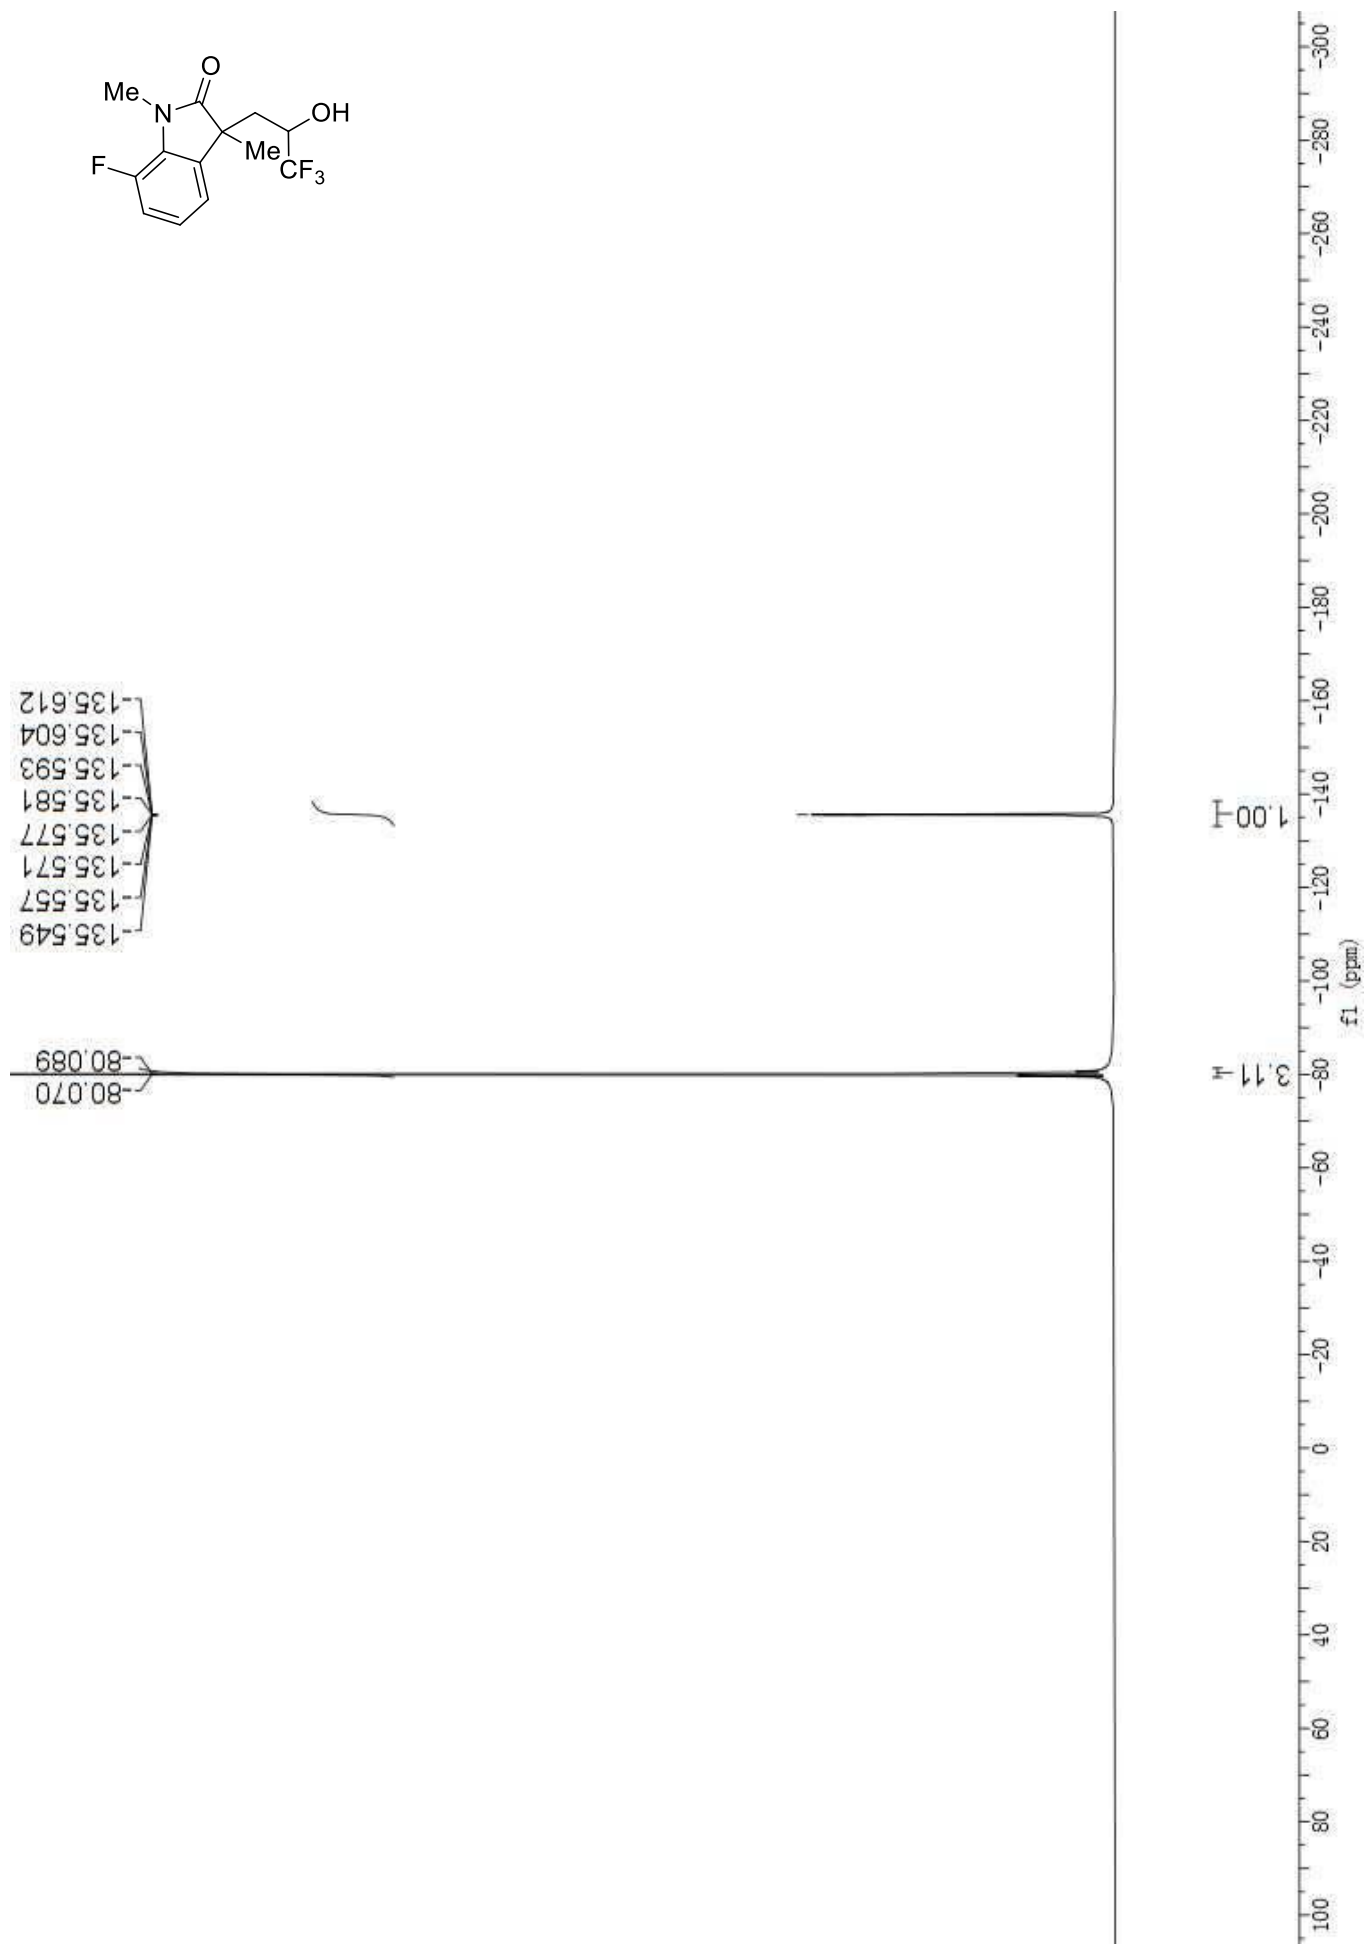

<sup>1</sup>H NMR of **11e**(CDCl<sub>3</sub>, 400 MHz, 25 °C)

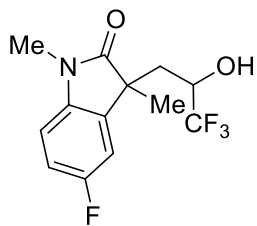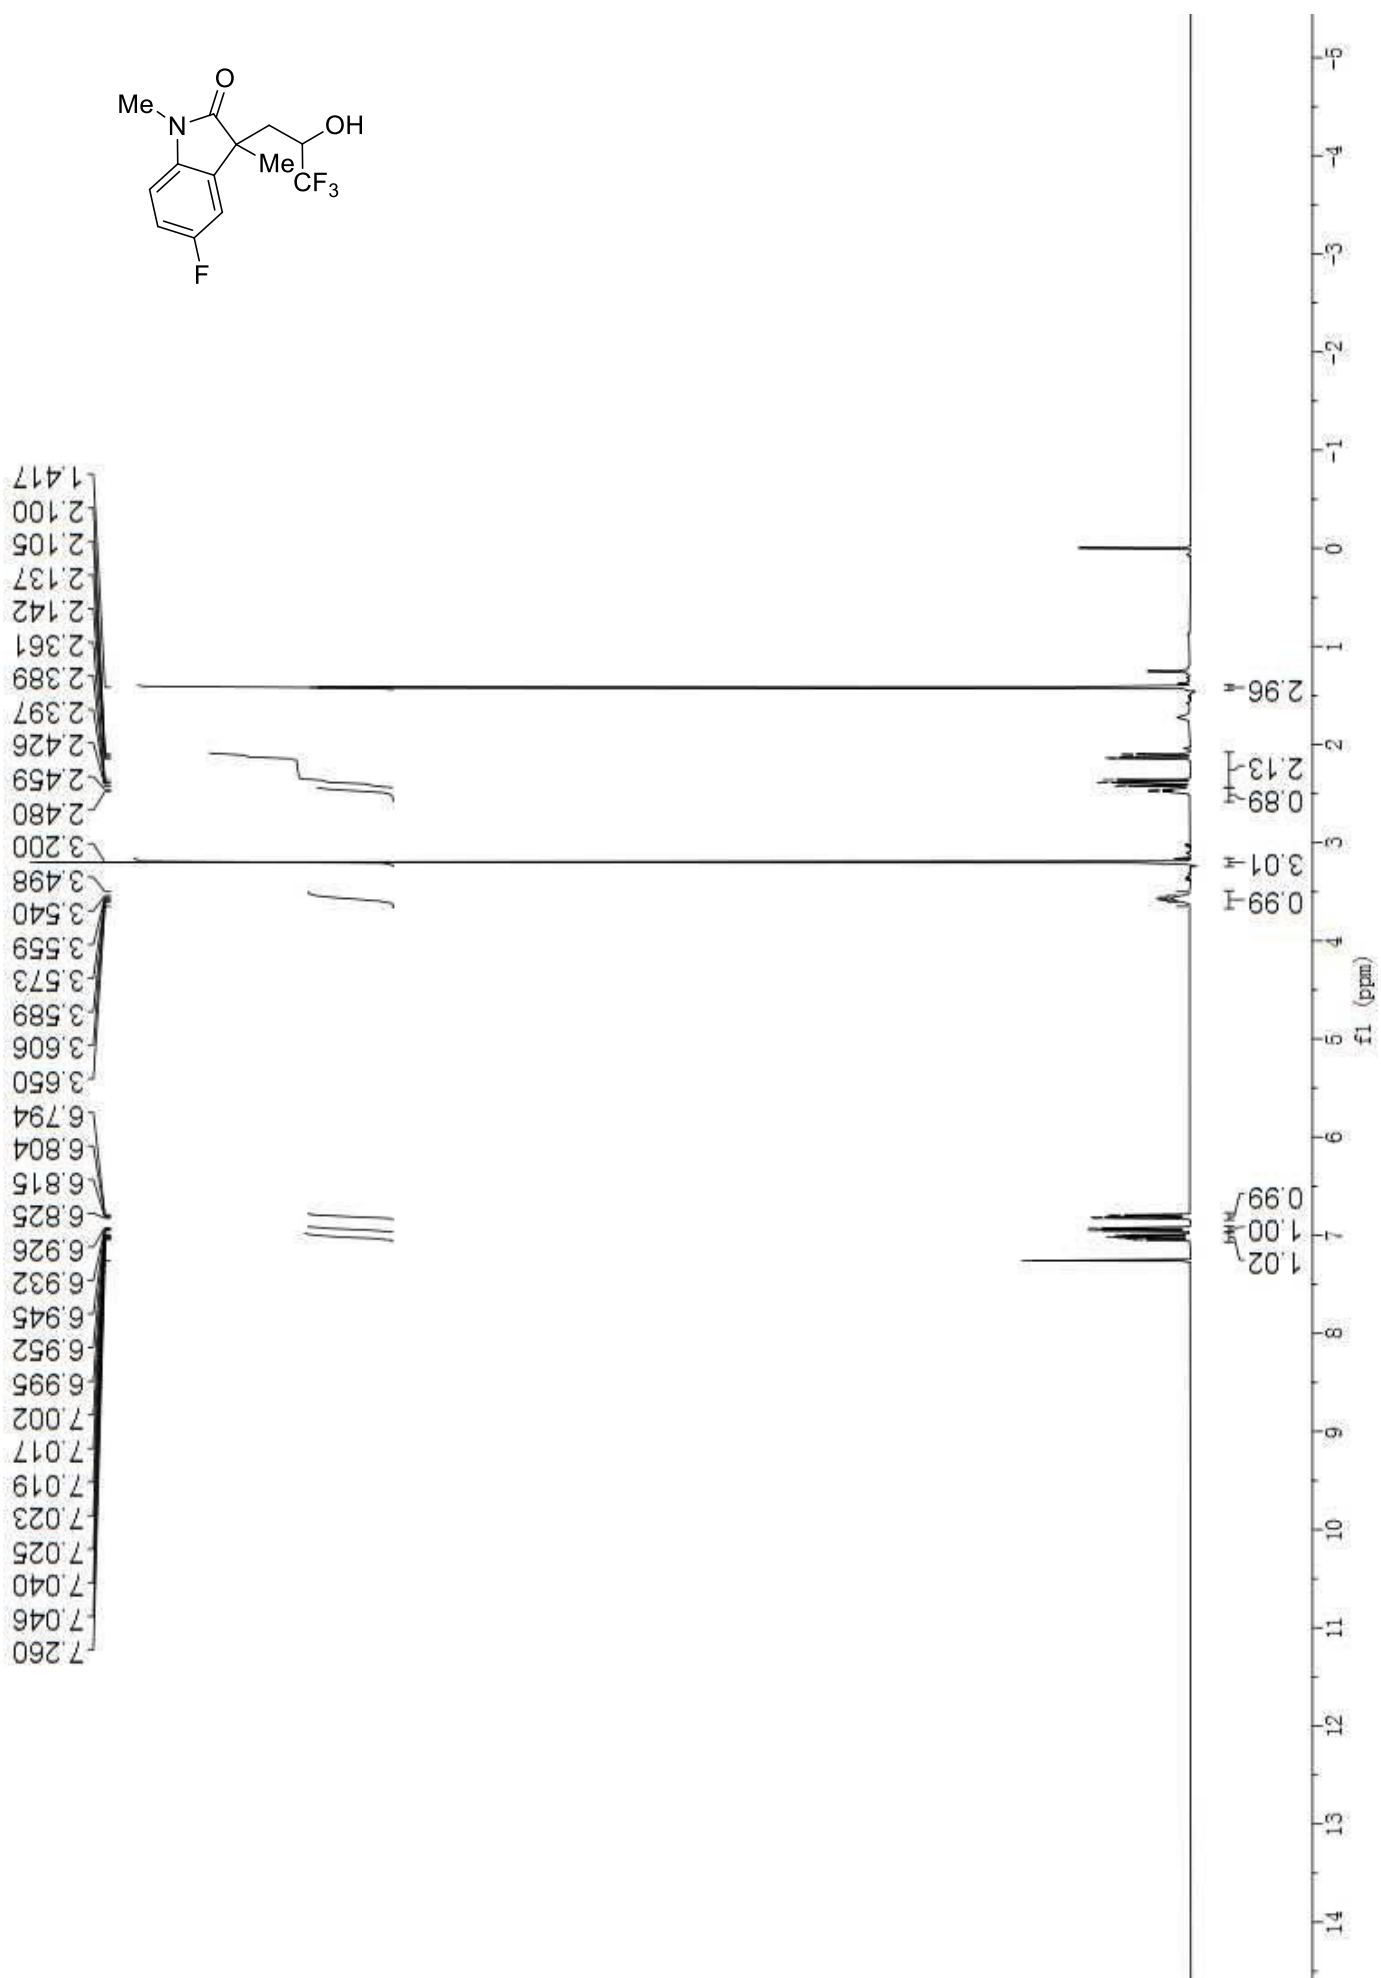

$^{13}\text{C}$  NMR of **11e** ( $\text{CDCl}_3$ , 150 MHz, 25 °C)

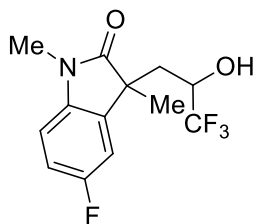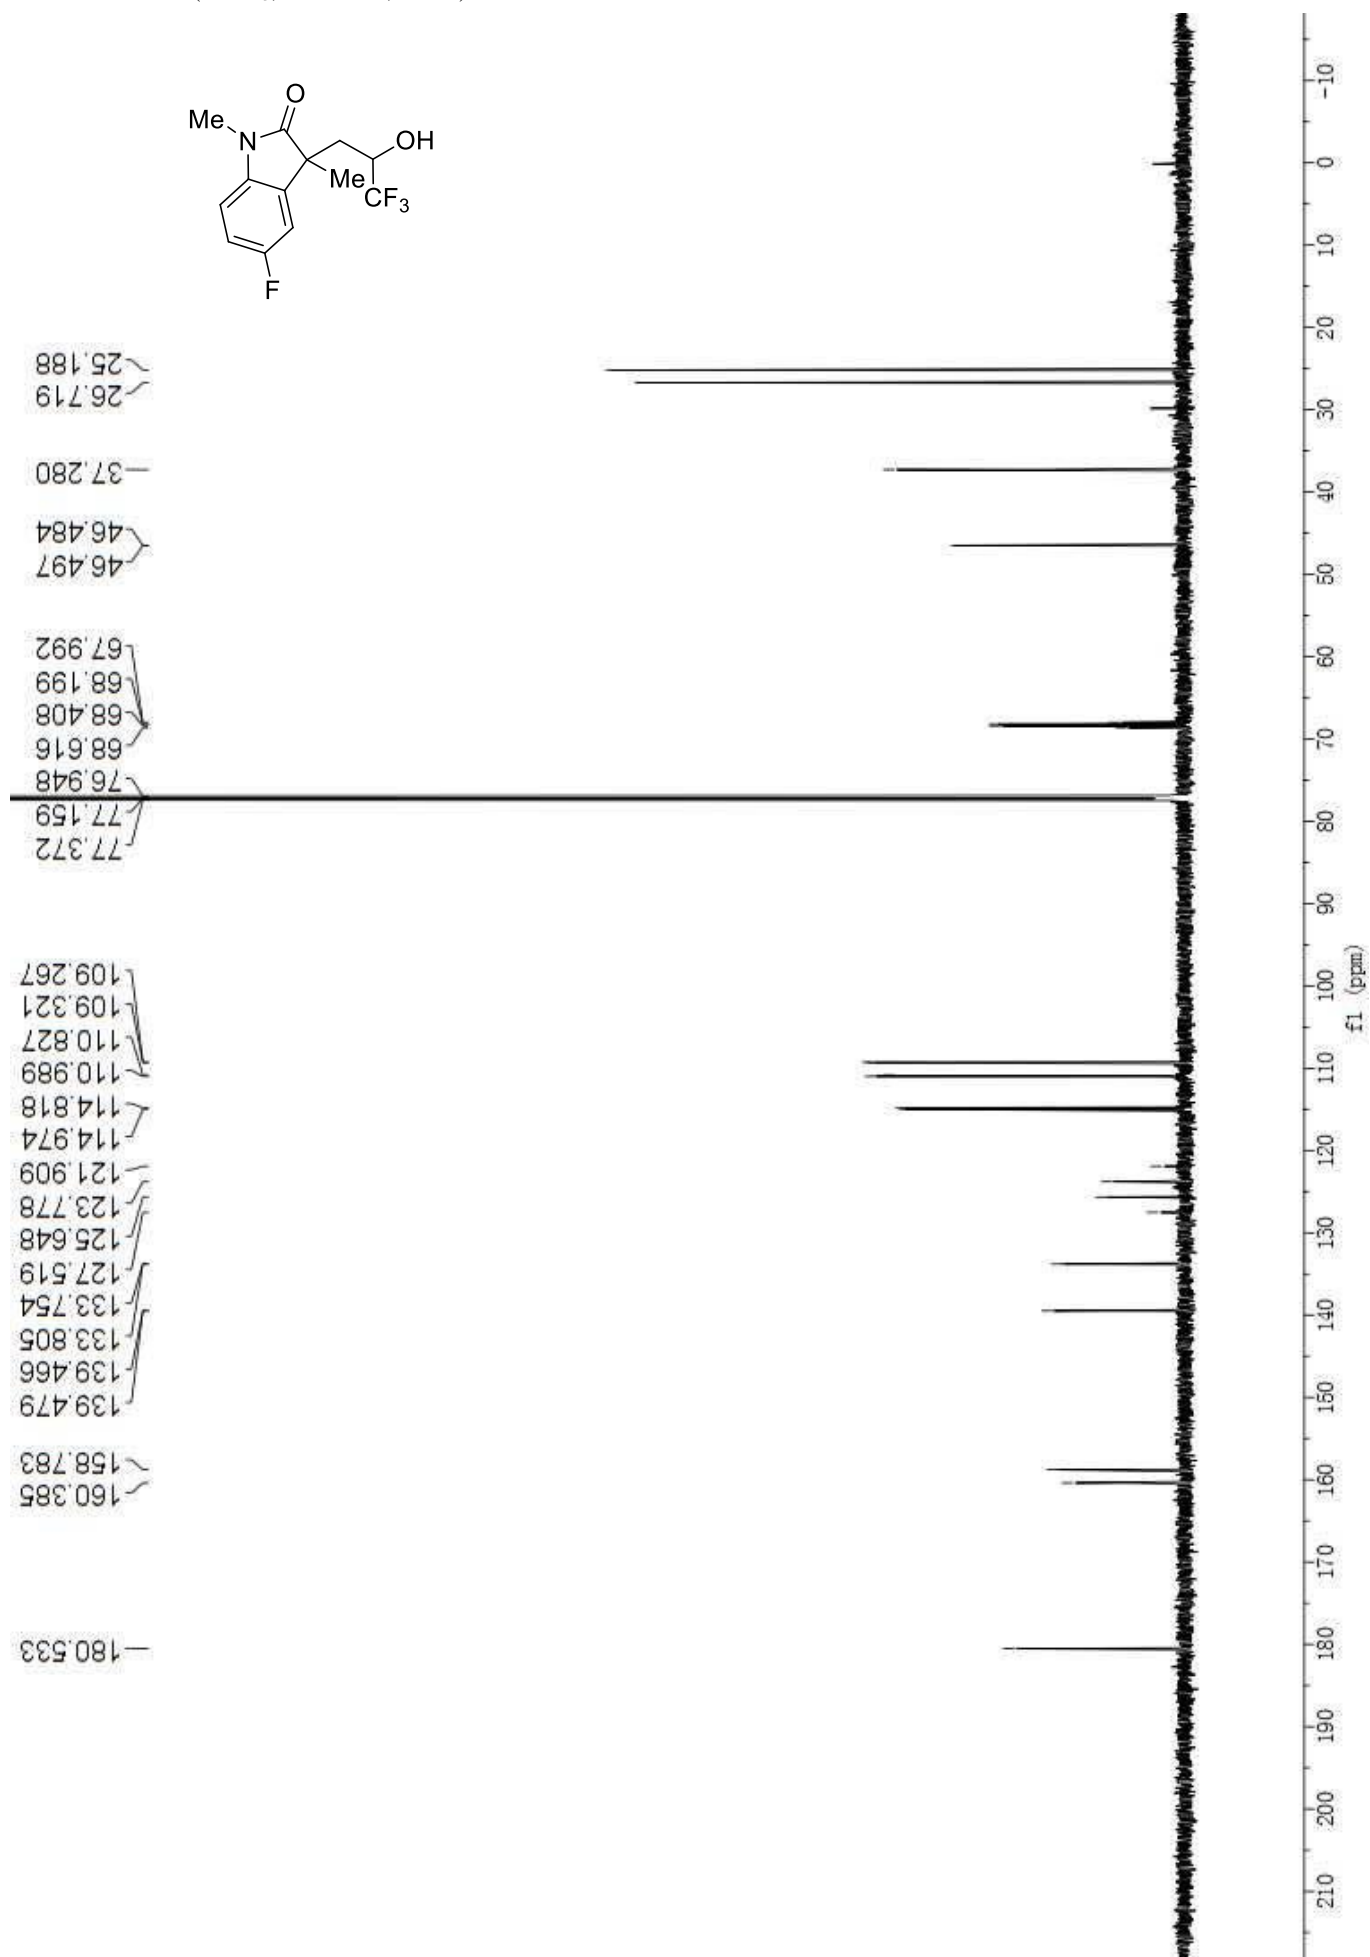

$^{19}\text{F}$  NMR of **11e** ( $\text{CDCl}_3$ , 375 MHz, 25 °C)

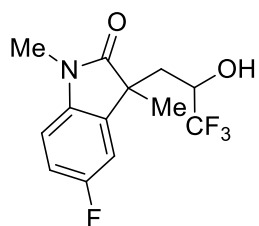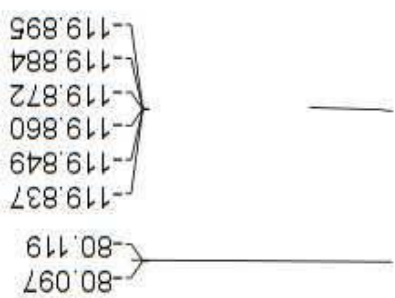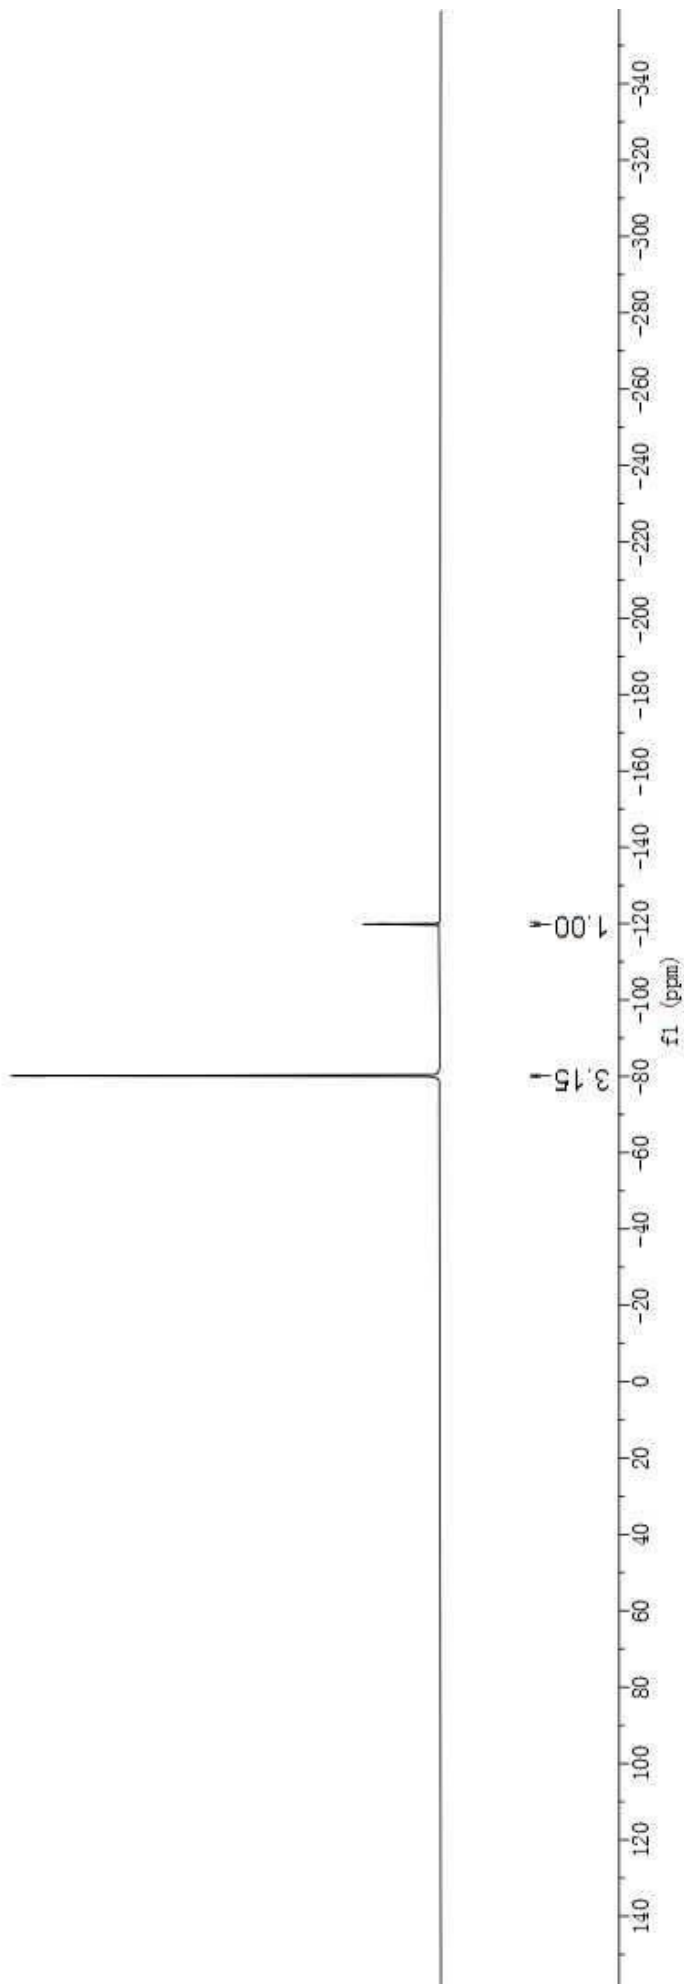

<sup>1</sup>H NMR of **11f** (CDCl<sub>3</sub>, 400 MHz, 25 °C)

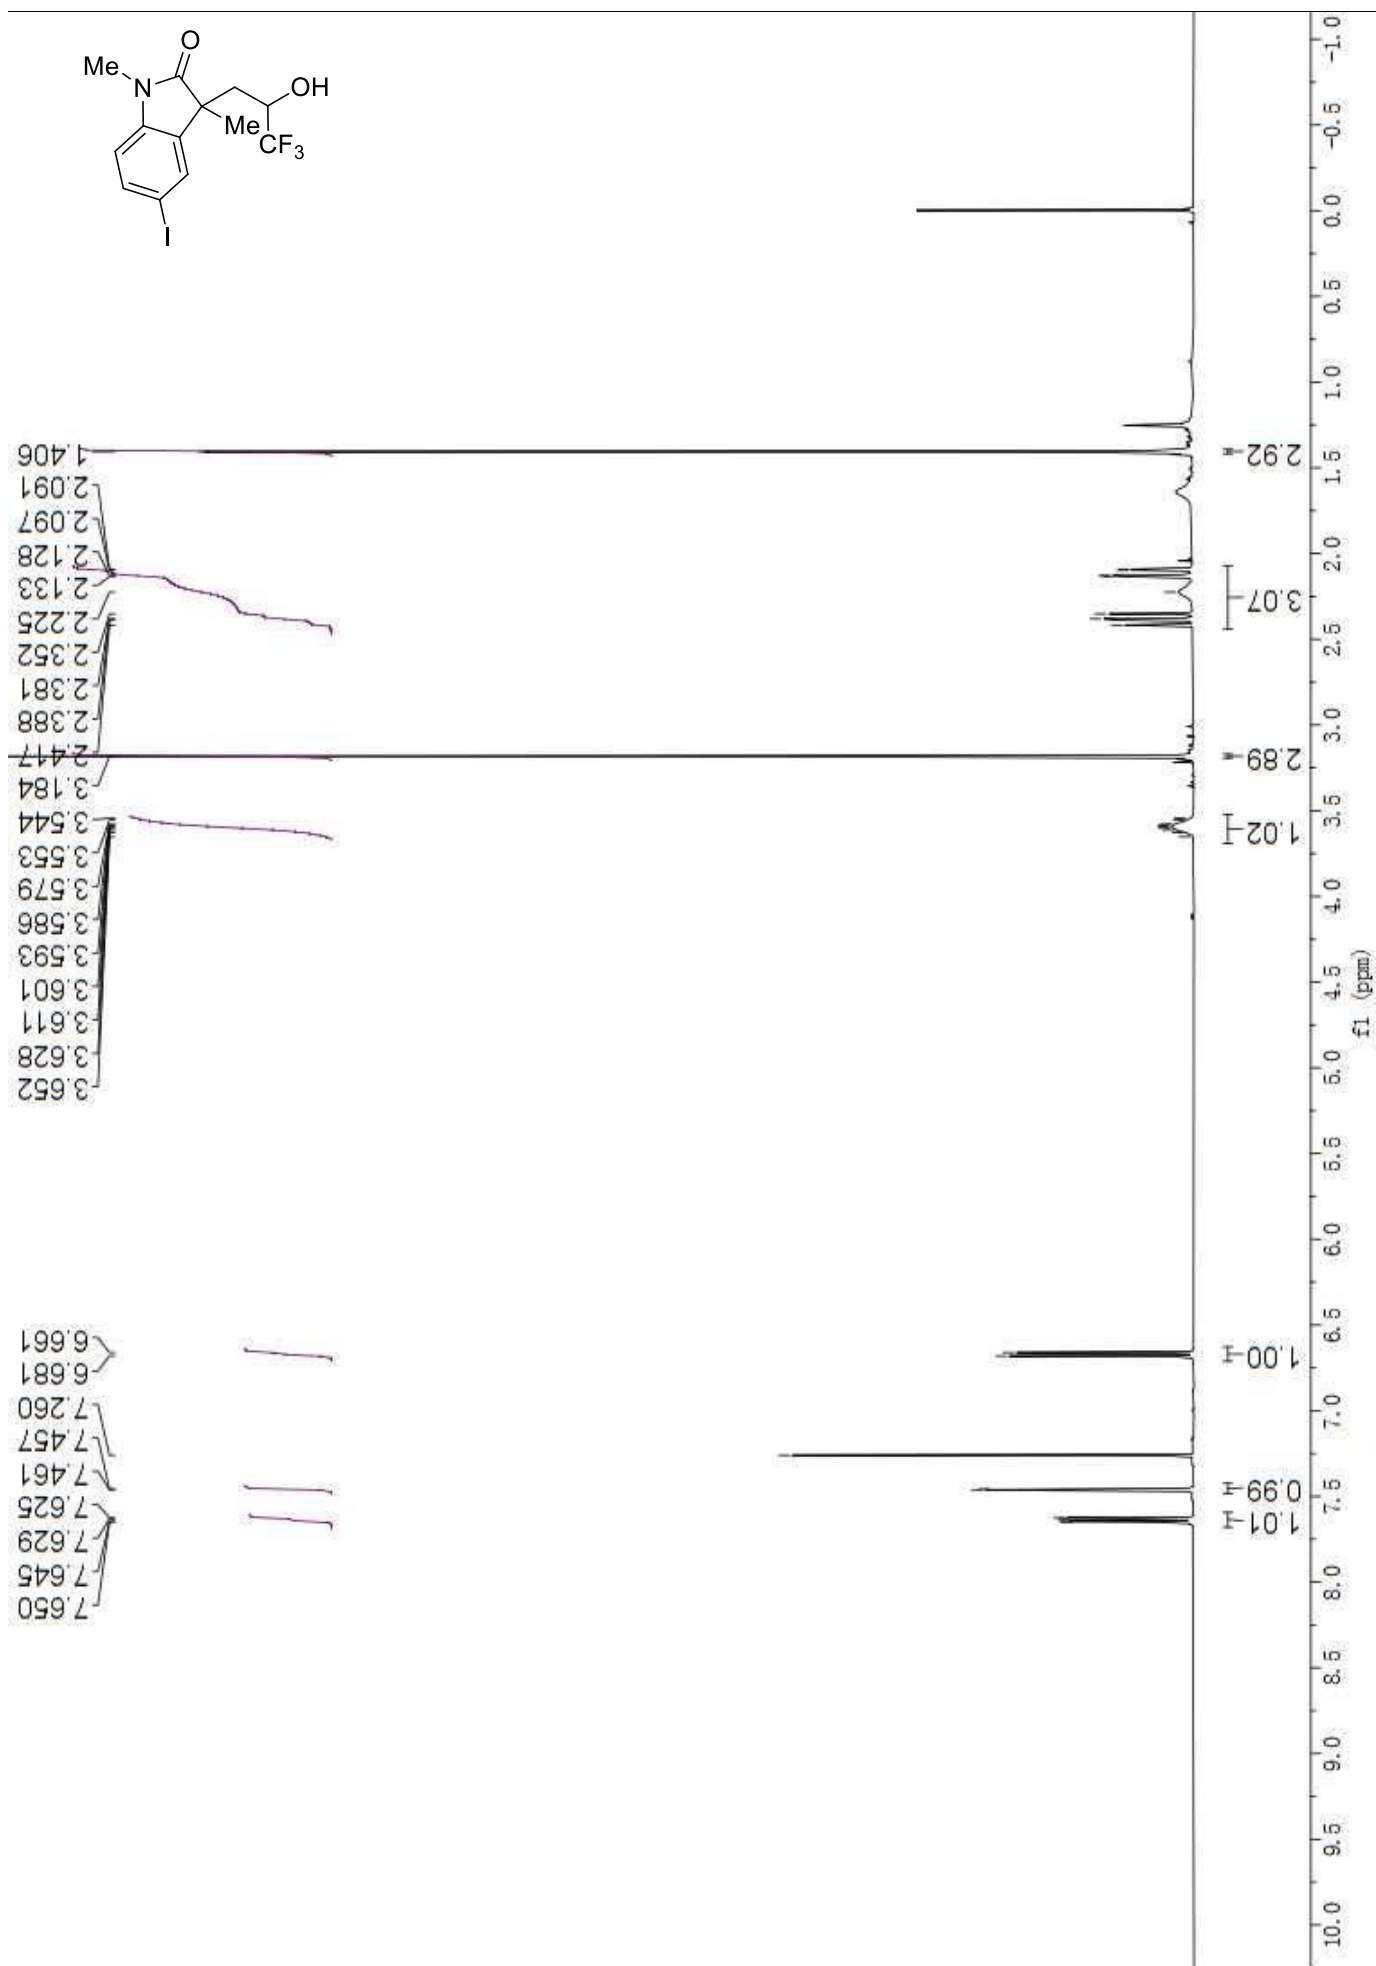

$^{13}\text{C}$  NMR of **11f** ( $\text{CDCl}_3$ , 150 MHz, 25  $^\circ\text{C}$ )

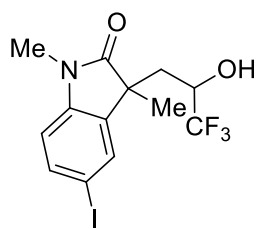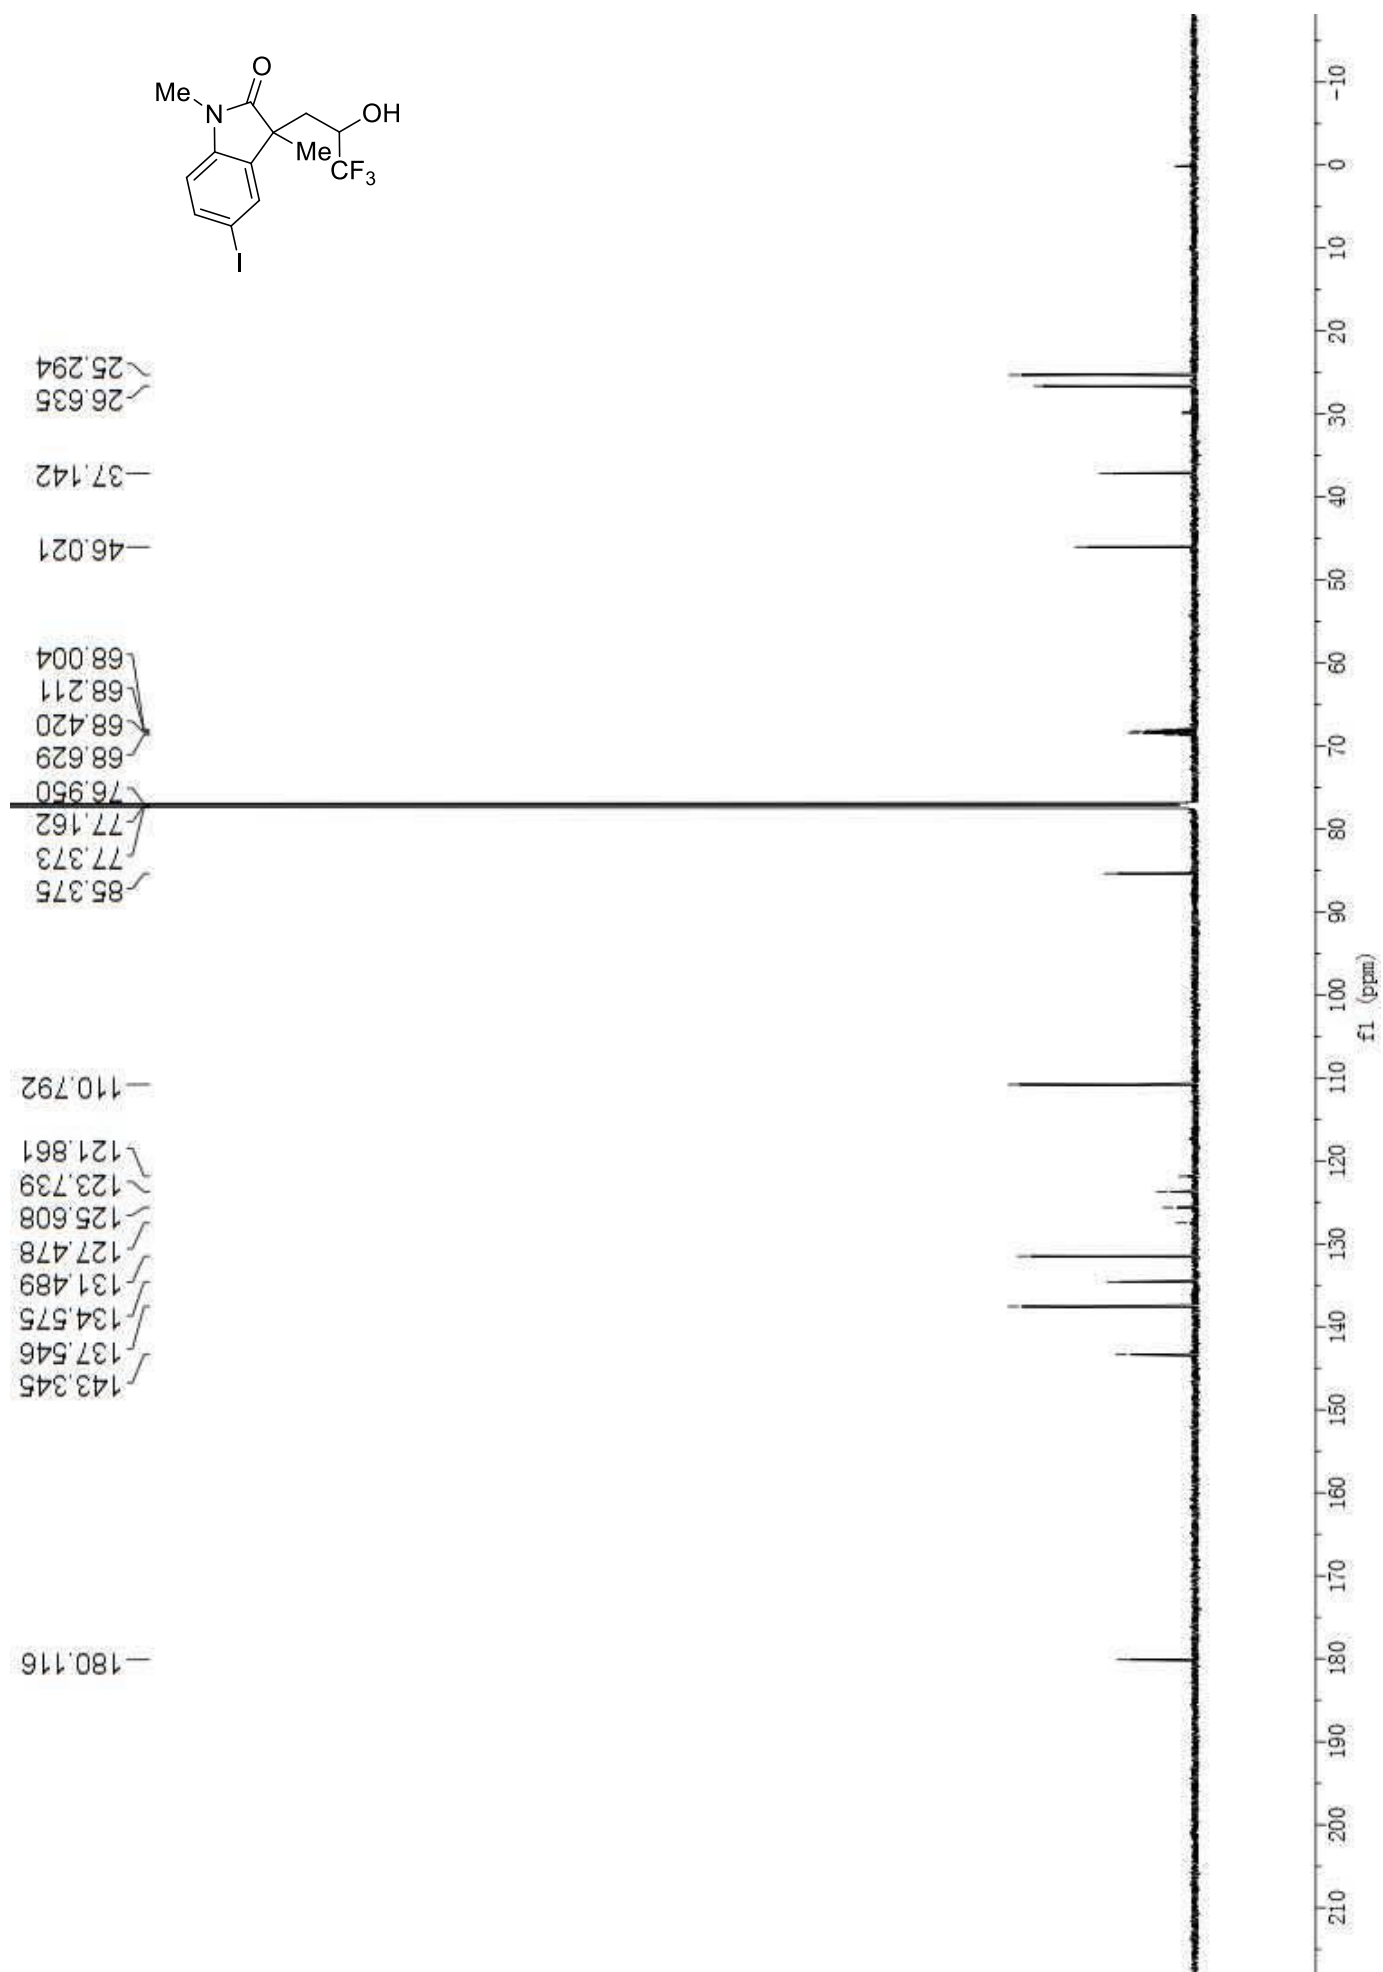



$^{19}\text{F}$  NMR of **11f** ( $\text{CDCl}_3$ , 375 MHz, 25  $^\circ\text{C}$ )

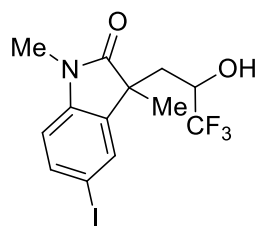

-79.982  
-80.001

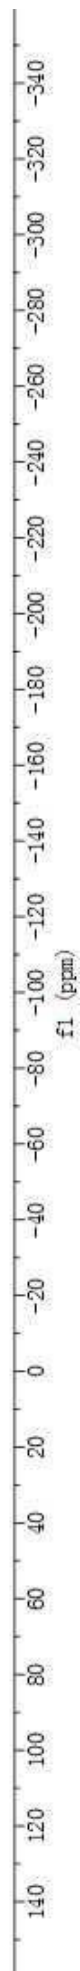

<sup>1</sup>H NMR of **11g** (CDCl<sub>3</sub>, 400 MHz, 25 °C)

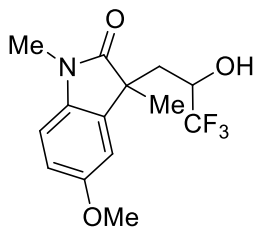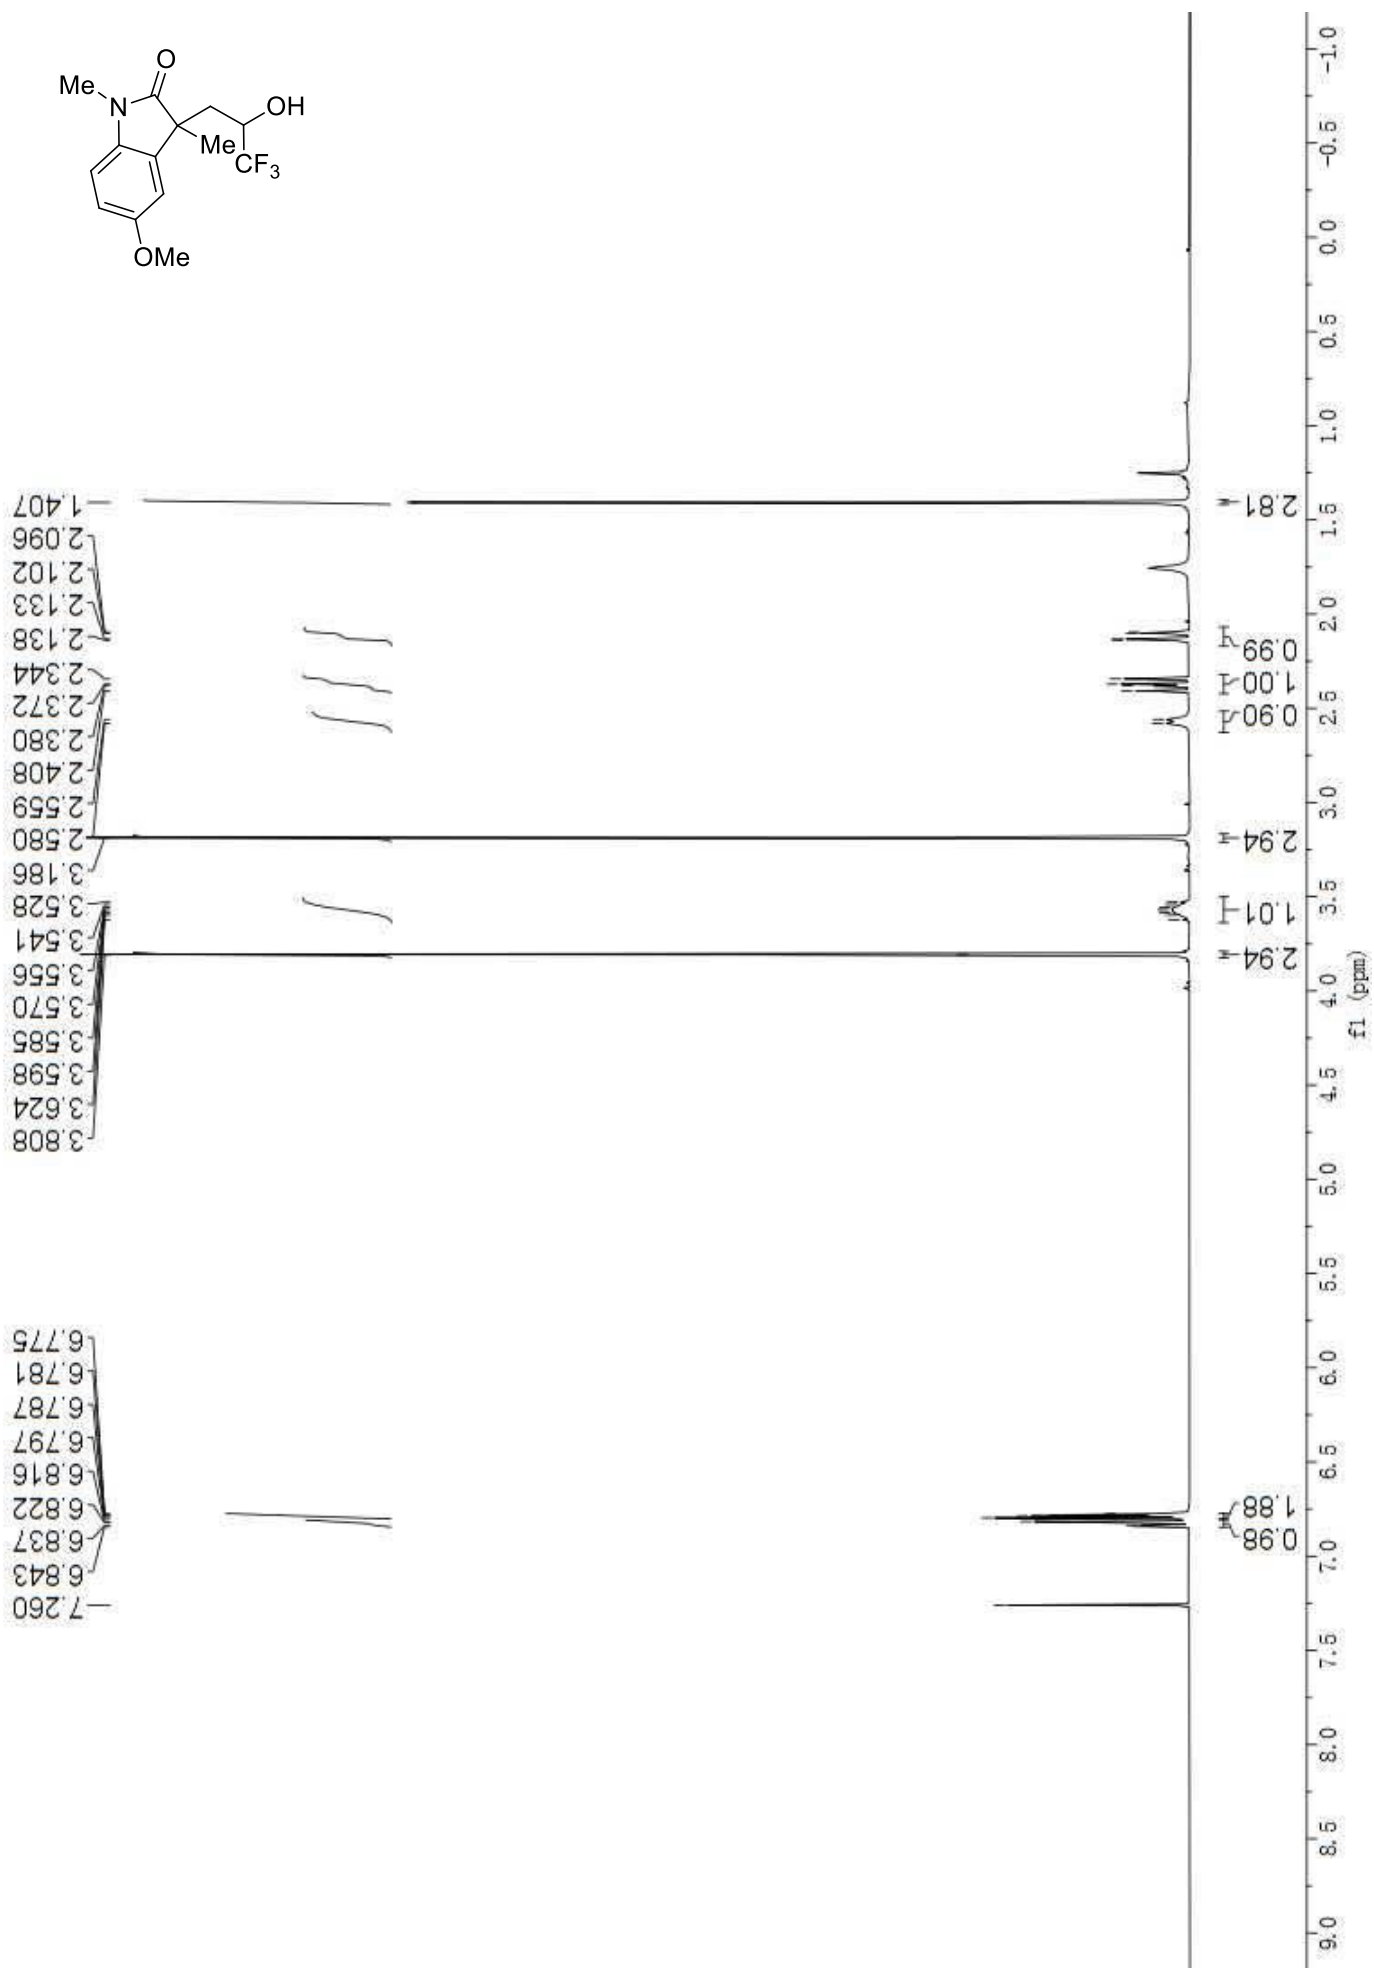

$^{13}\text{C}$  NMR of **11g** ( $\text{CDCl}_3$ , 150 MHz, 25 °C)

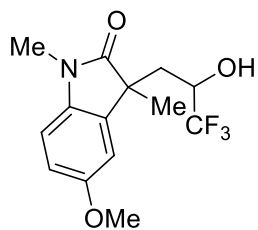

25.394  
26.662

37.390

46.469

55.970

68.034

68.242

68.449

68.657

76.949

77.160

77.372

109.058

110.434

112.387

121.999

123.868

125.738

127.609

133.559

137.012

156.421

180.569

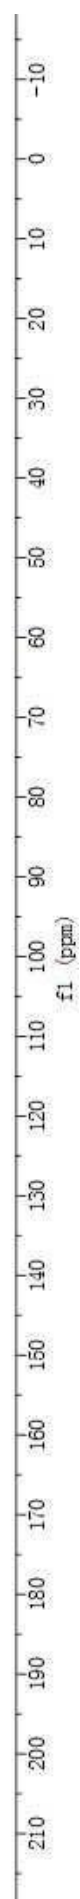

$^{19}\text{F}$  NMR of **11g** ( $\text{CDCl}_3$ , 375 MHz, 25 °C)

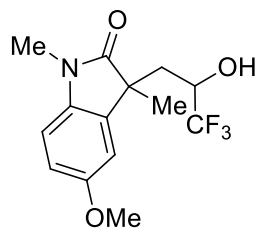

-80.125  
-80.108

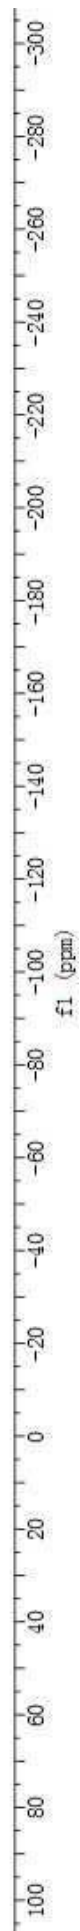

<sup>1</sup>H NMR of **11h** (CDCl<sub>3</sub>, 400 MHz, 25 °C)

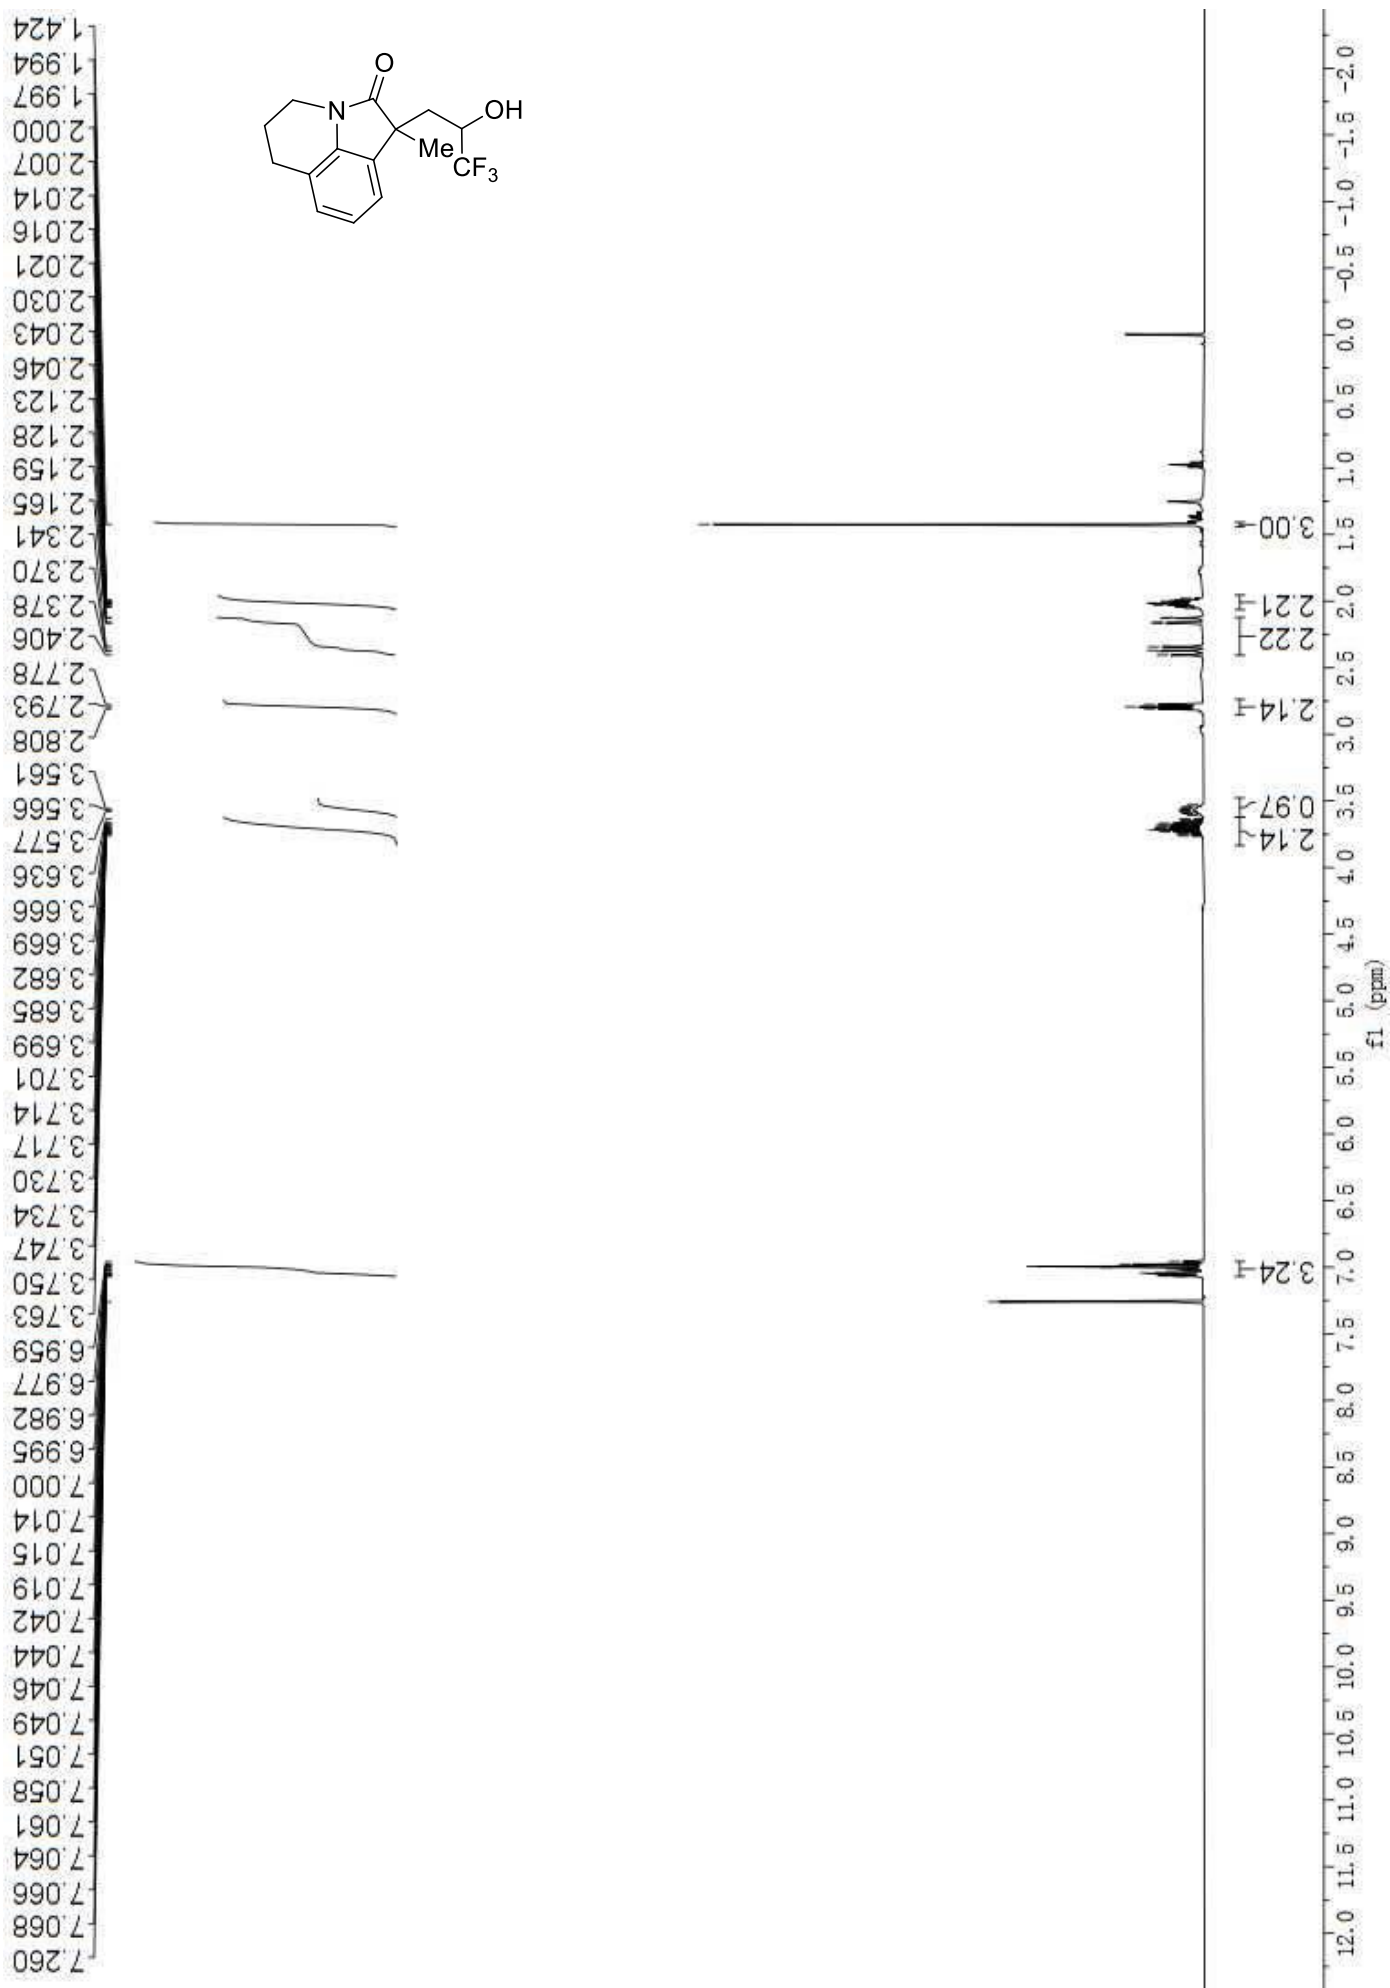

$^{13}\text{C}$  NMR of **11h** ( $\text{CDCl}_3$ , 150 MHz, 25 °C)

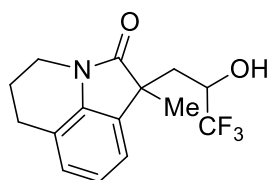

21.202  
24.696  
25.056  
37.254  
39.110  
47.376  
68.126  
68.333  
68.540  
68.746  
76.943  
77.155  
77.367

120.417  
120.886  
122.058  
122.443  
123.928  
125.798  
127.380  
127.668  
130.630  
139.309

179.784

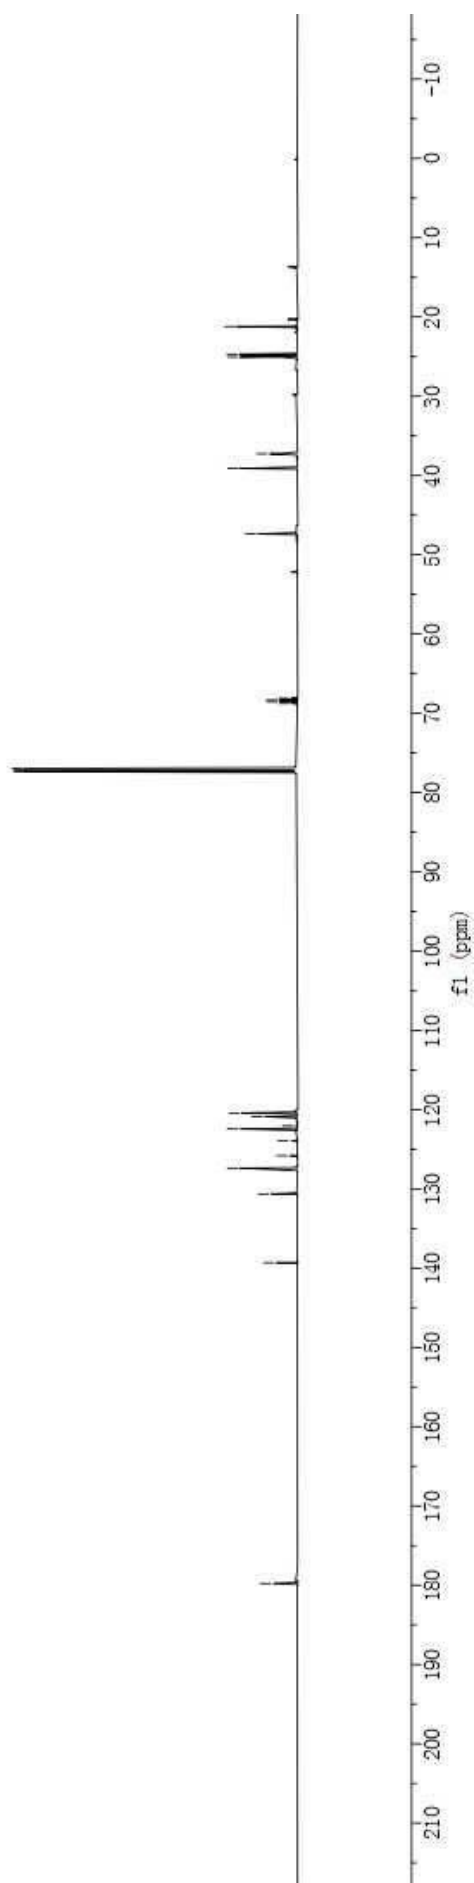

$^{19}\text{F}$  NMR of **11h** ( $\text{CDCl}_3$ , 375 MHz, 25  $^\circ\text{C}$ )

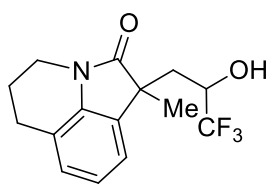

-80.093  
-80.076

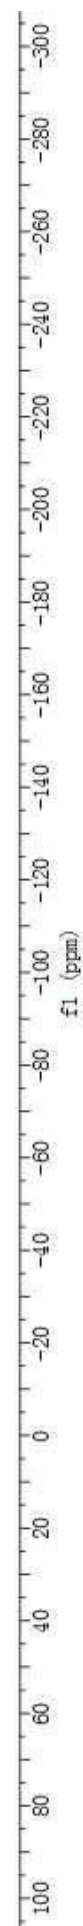

$^1\text{H}$  NMR of **11i** ( $\text{CDCl}_3$ , 400 MHz, 25  $^\circ\text{C}$ )

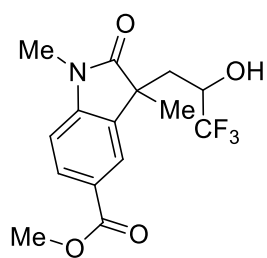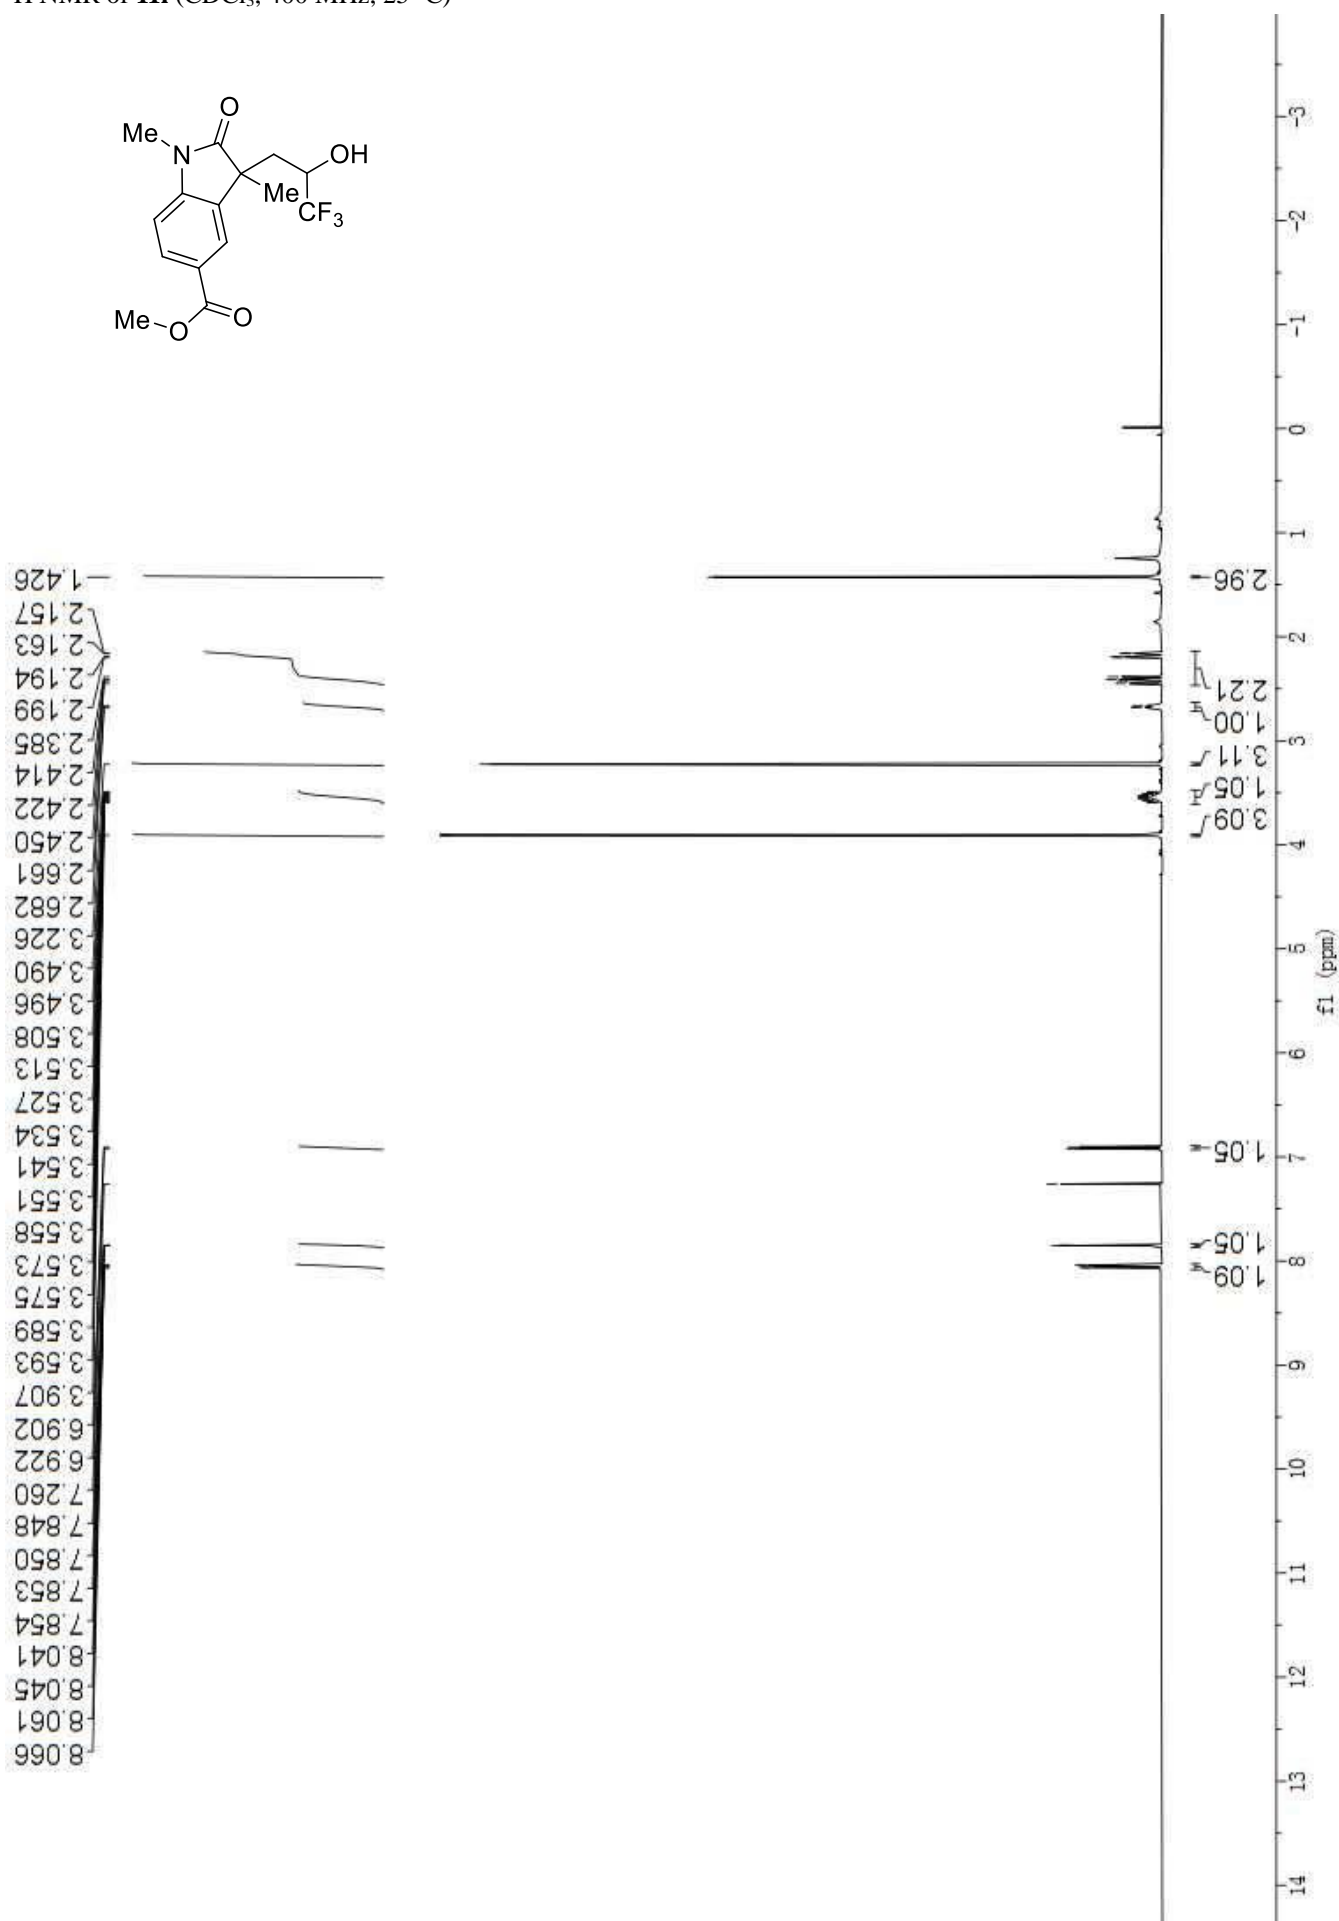



$^{13}\text{C}$  NMR of **11i** ( $\text{CDCl}_3$ , 150 MHz, 25  $^\circ\text{C}$ )

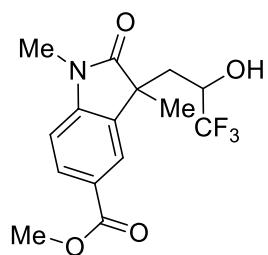

25.127  
26.760

37.169

45.789

52.290

67.946

68.154

68.363

68.571

76.949

77.160

77.373

108.235

121.897

123.768

123.965

124.818

125.638

127.509

131.385

132.060

147.758

166.916

181.195

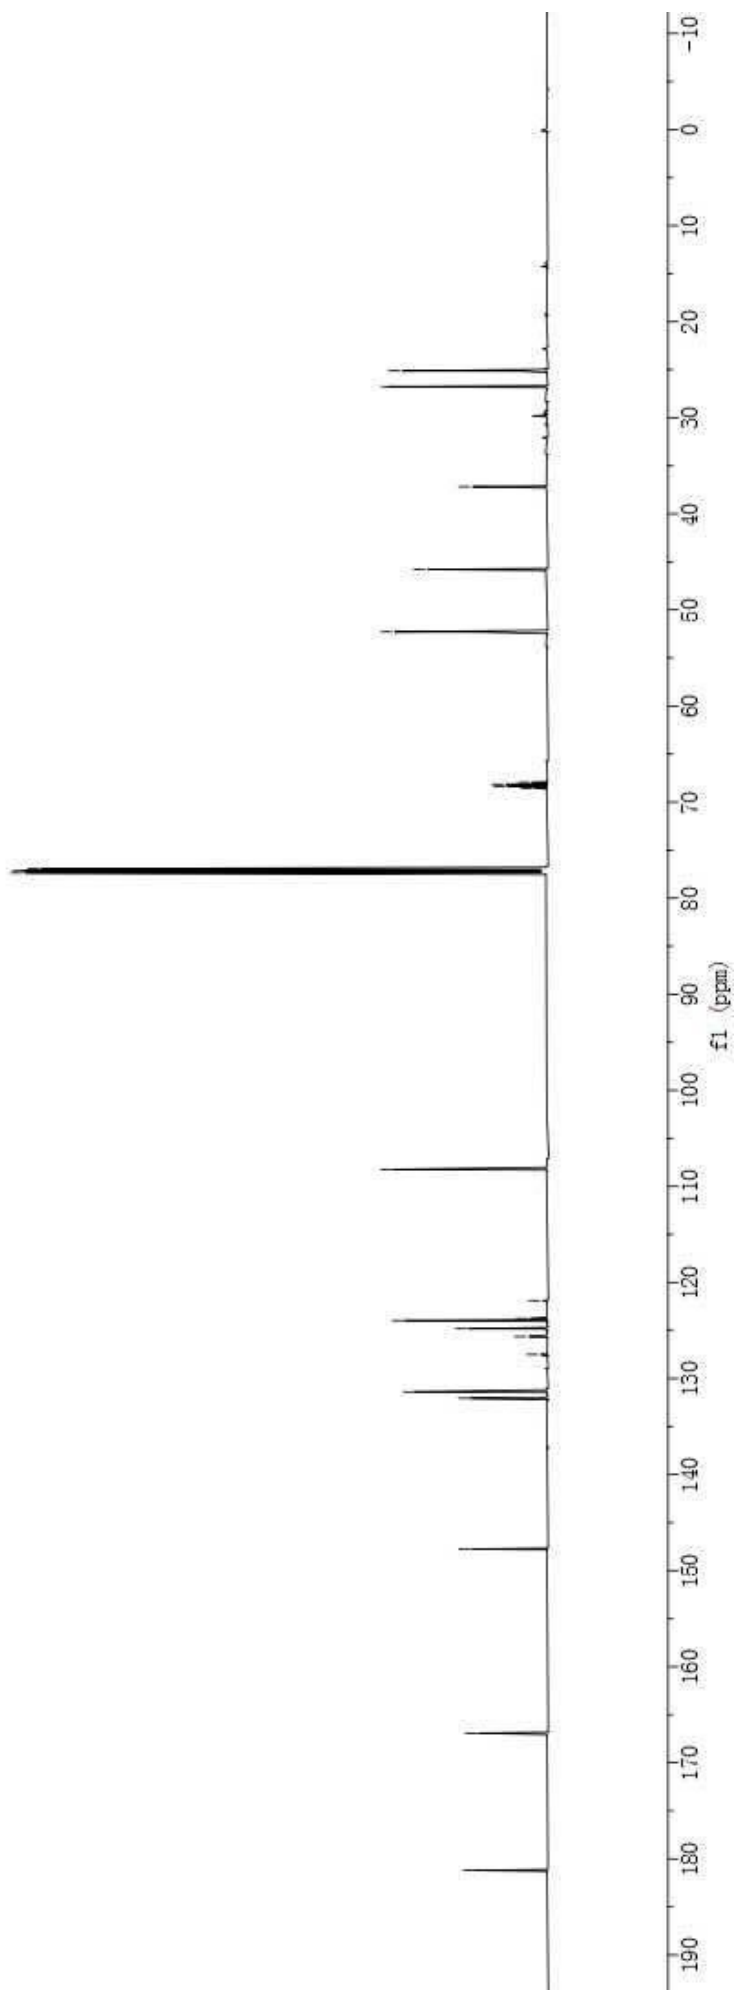

$^{19}\text{F}$  NMR of **11i** ( $\text{CDCl}_3$ , 375 MHz, 25 °C)

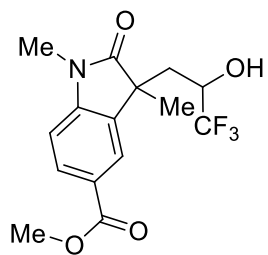

-79.946  
-79.926

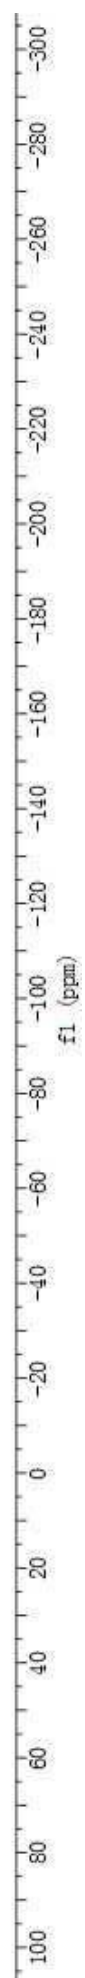

$^1\text{H}$  NMR of **13a** ( $\text{CDCl}_3$ , 400 MHz, 25  $^\circ\text{C}$ )

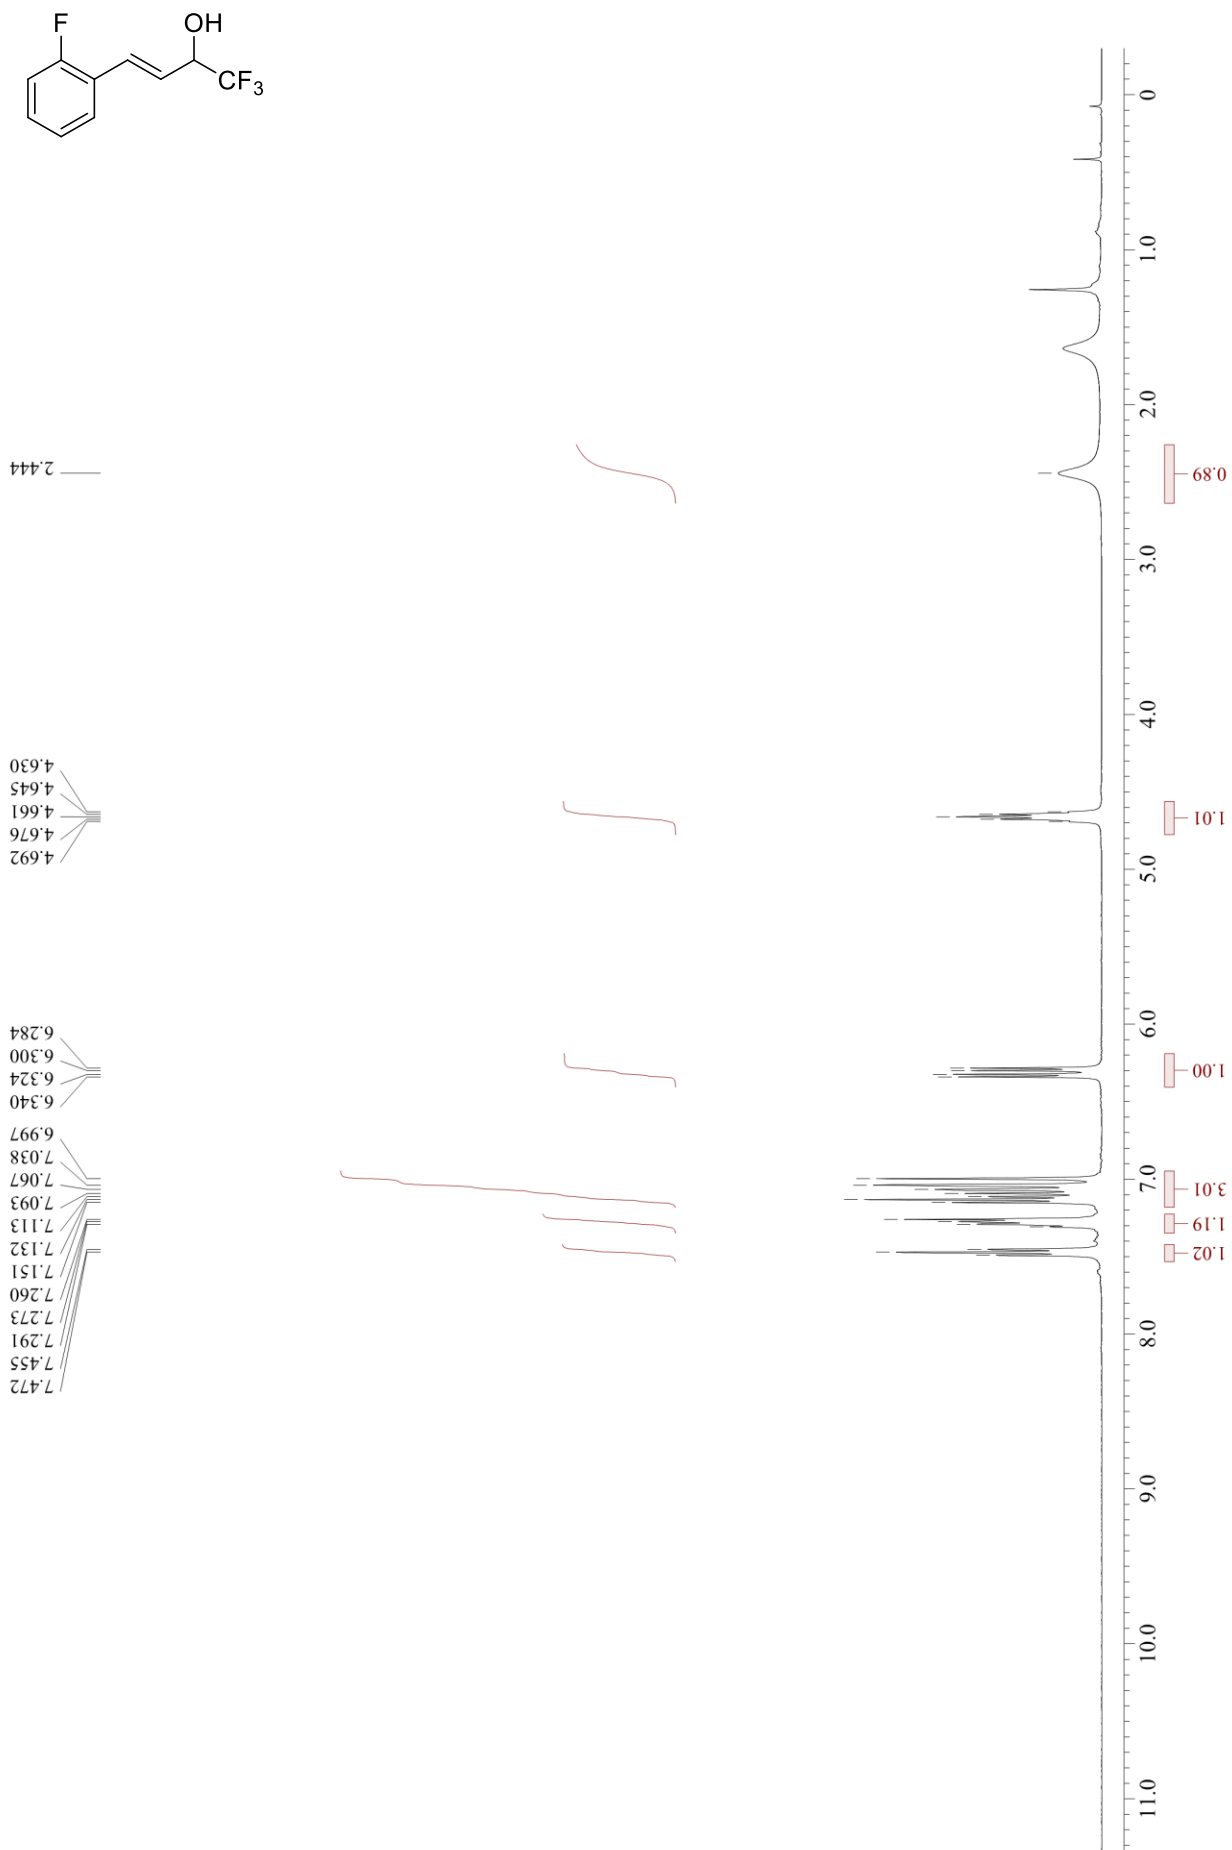

$^{13}\text{C}$  NMR of **13a** ( $\text{CDCl}_3$ , 100 MHz, 25 °C)

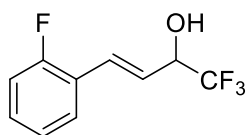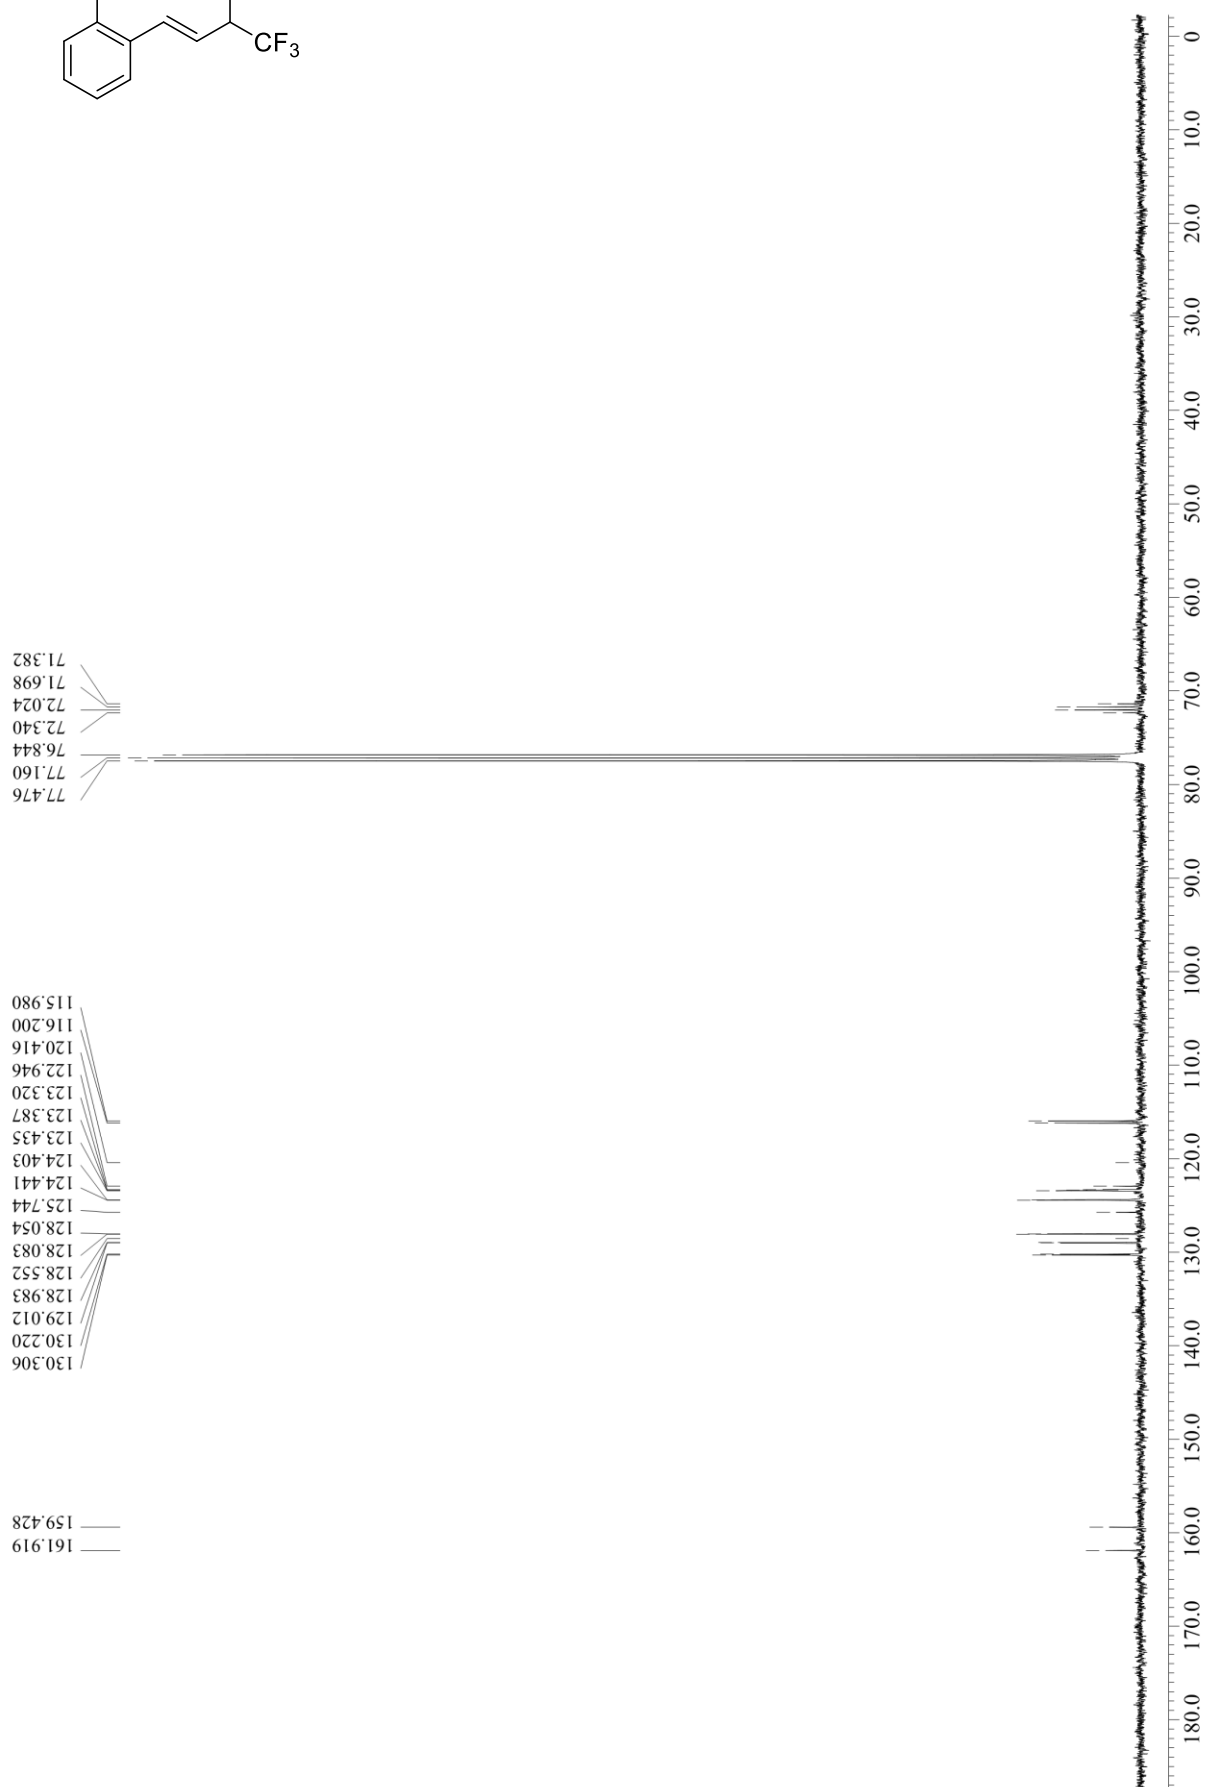

$^{19}\text{F}$  NMR of **13a** ( $\text{CDCl}_3$ , 375 MHz, 25 °C)

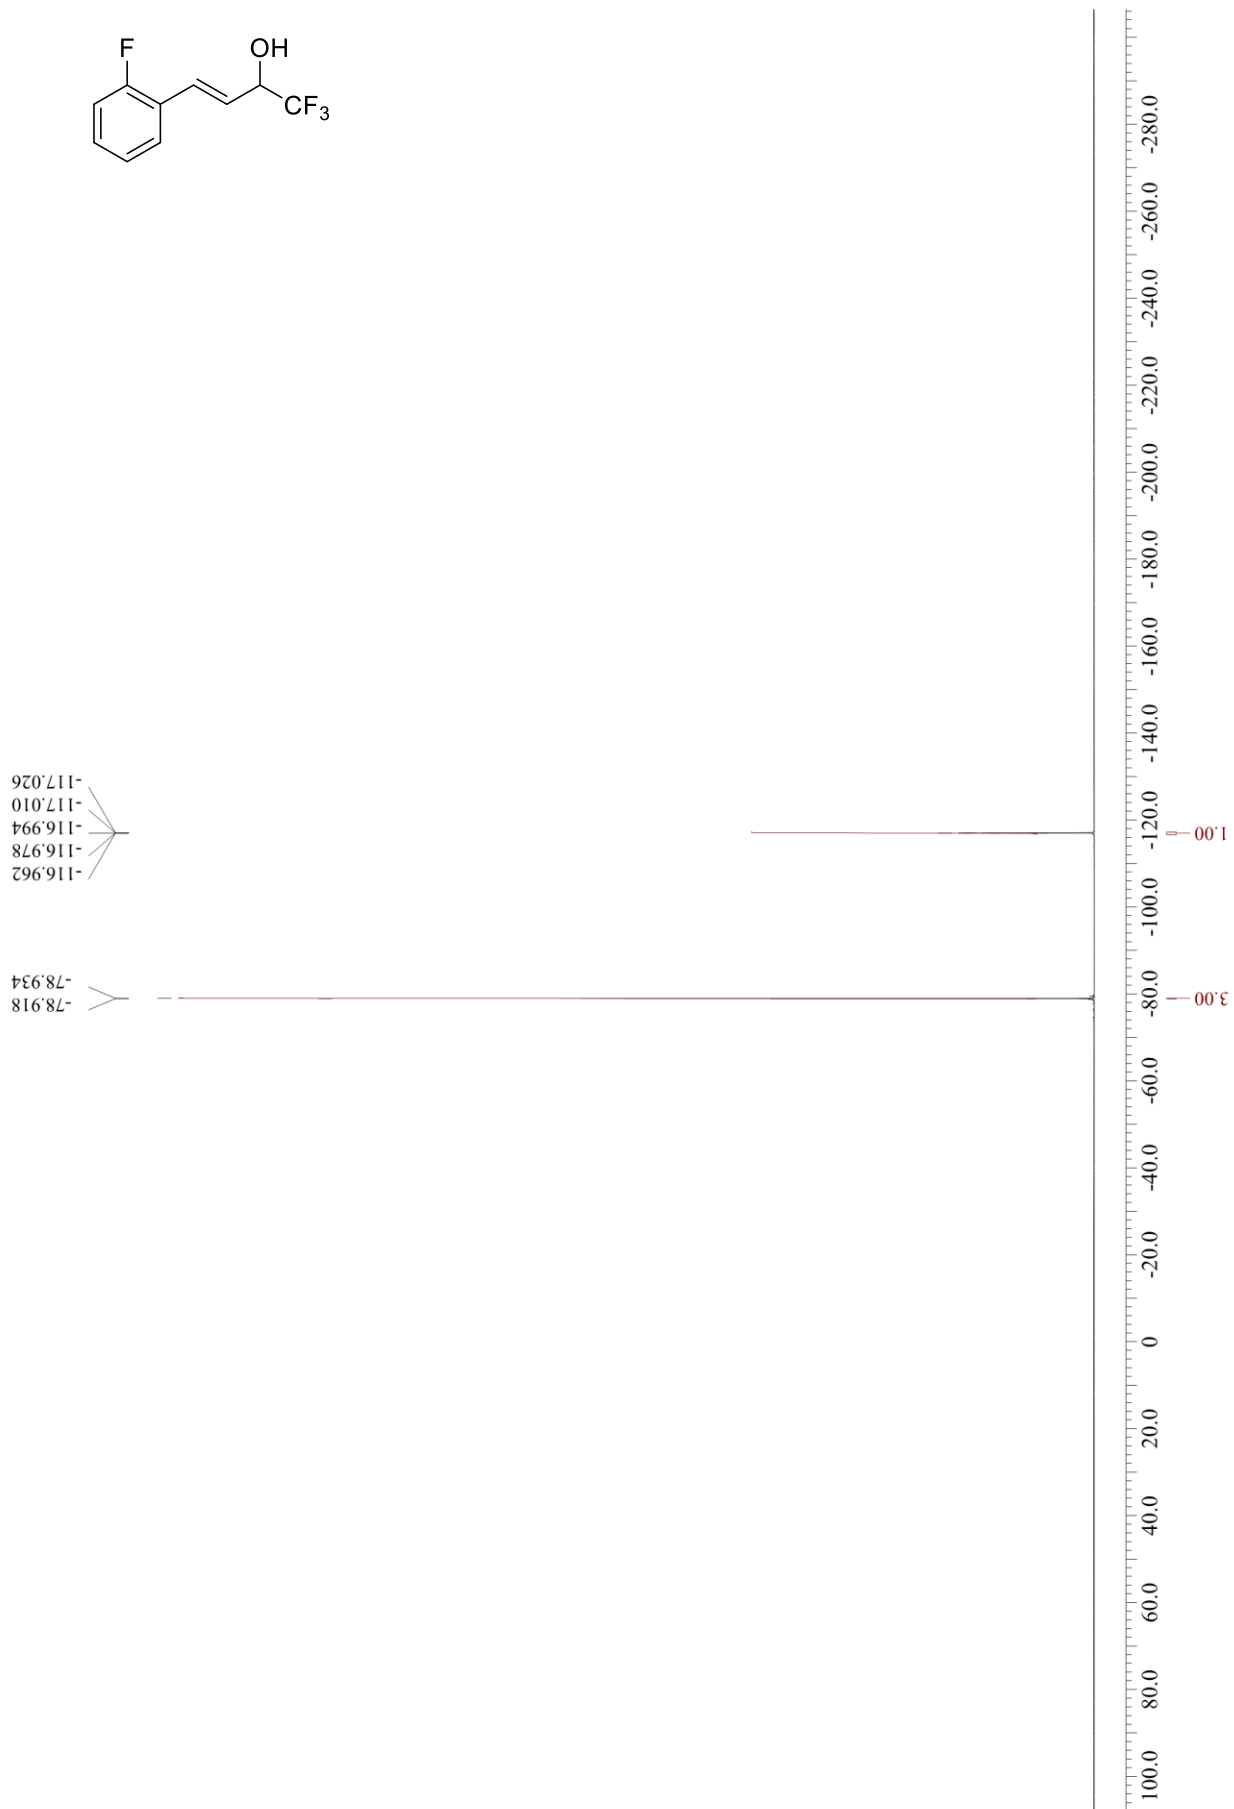

<sup>1</sup>H NMR of **13b** (CDCl<sub>3</sub>, 400 MHz, 25 °C)

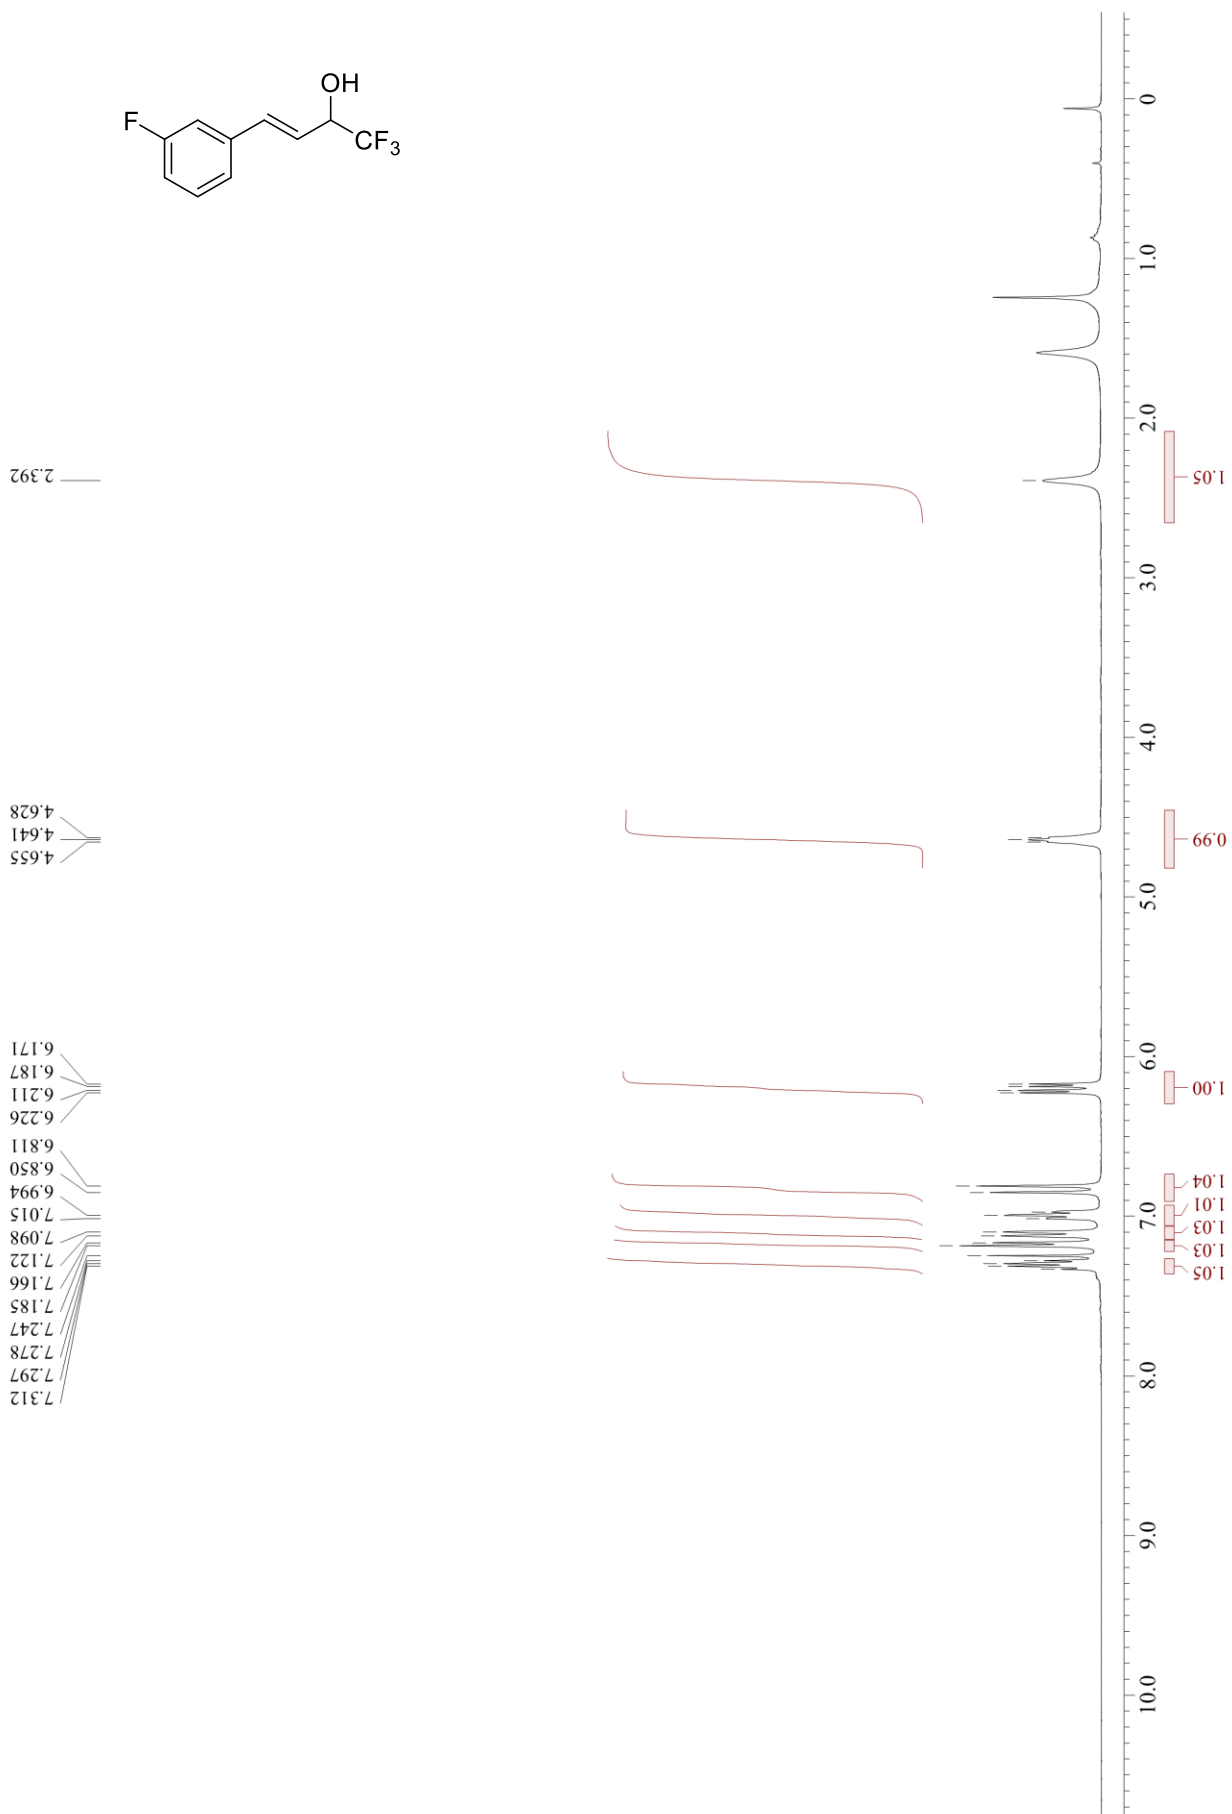

$^{13}\text{C}$  NMR of **13b** ( $\text{CDCl}_3$ , 150 MHz, 25 °C)

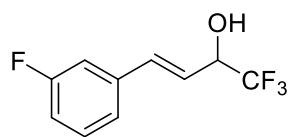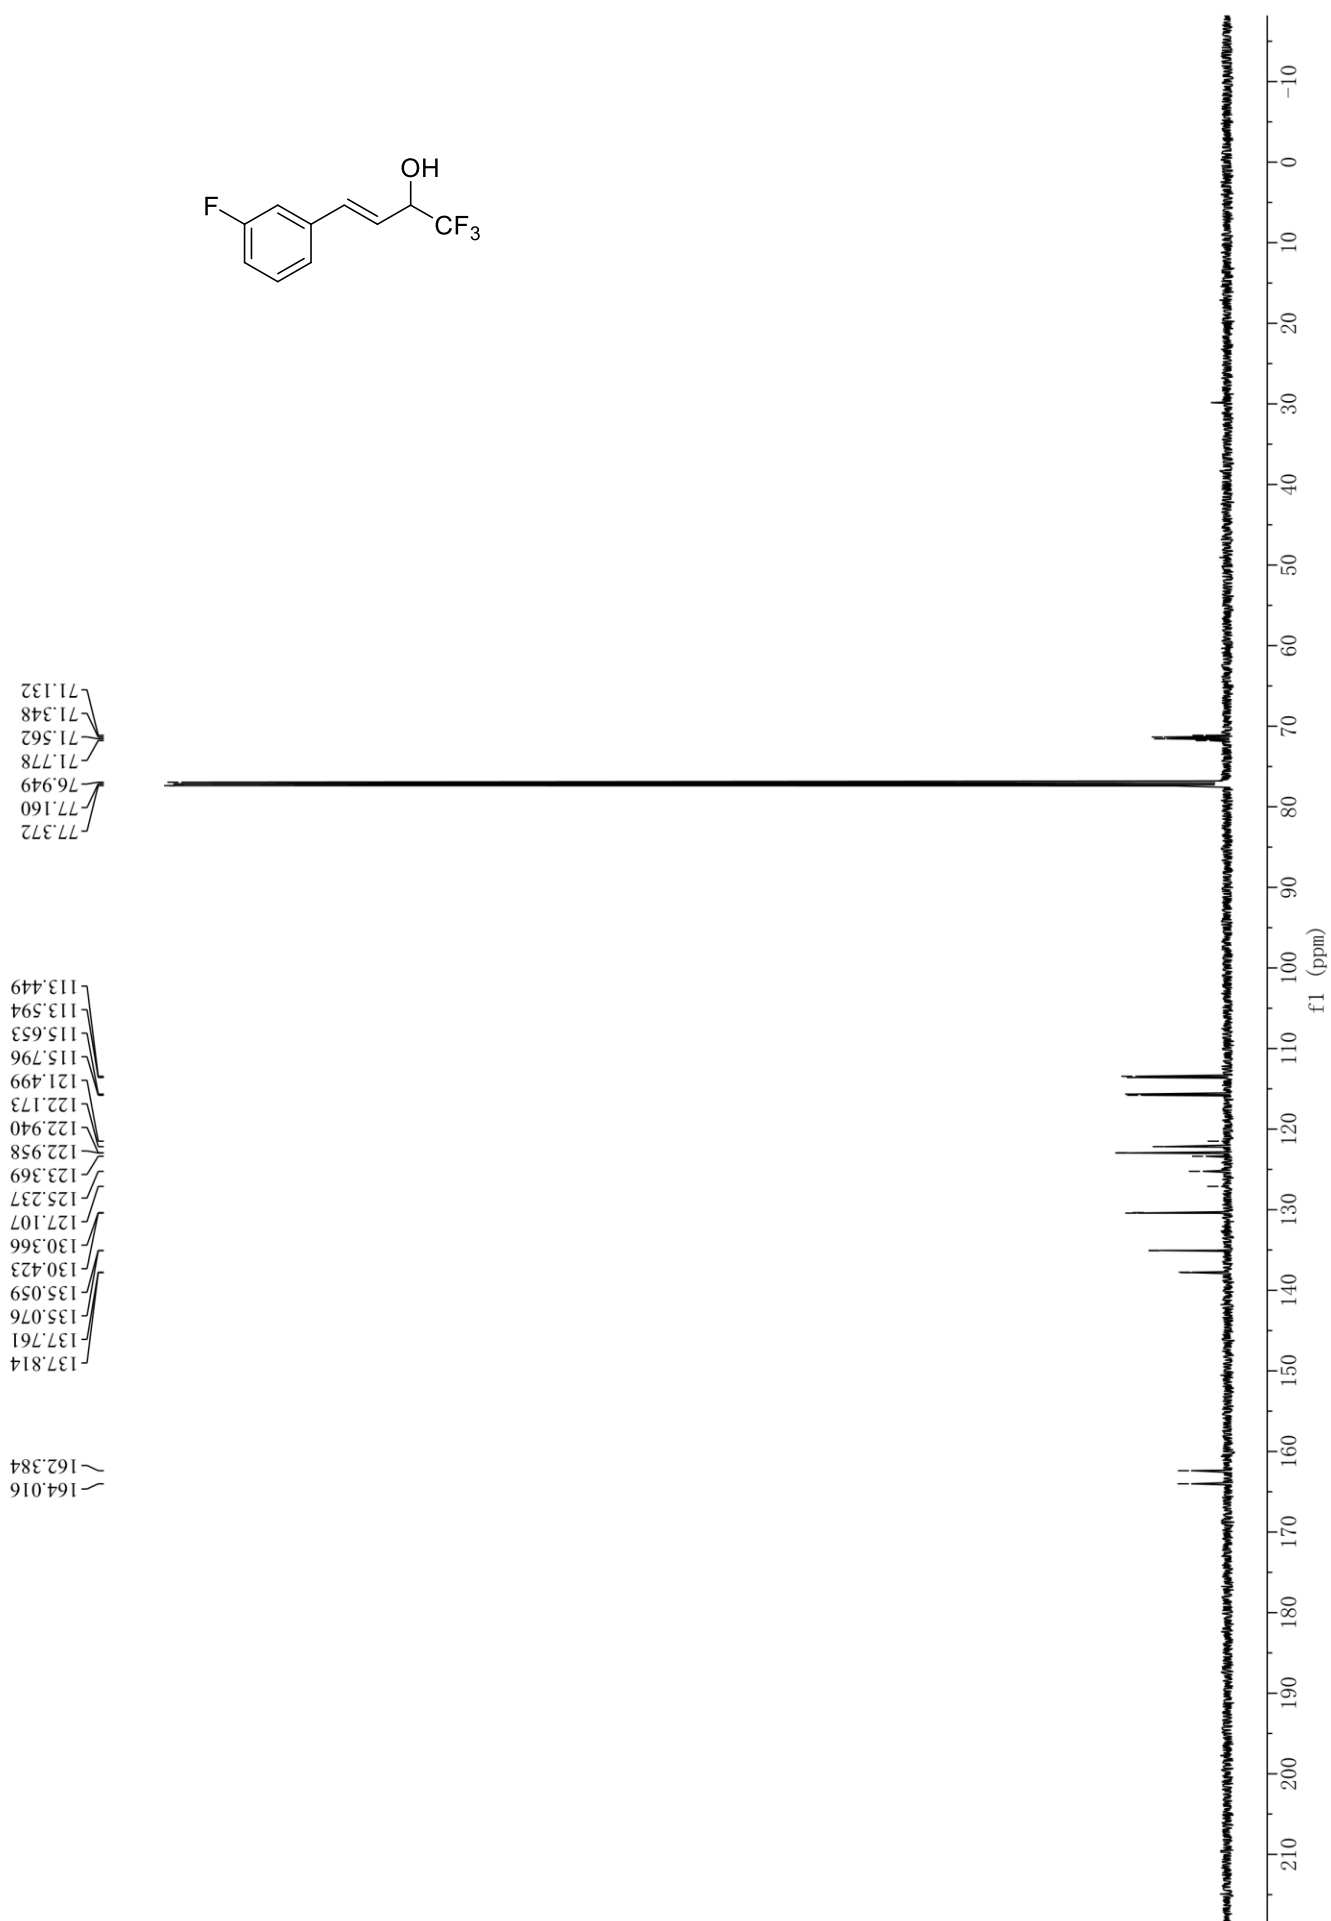

$^{19}\text{F}$  NMR of **13b** ( $\text{CDCl}_3$ , 375 MHz, 25  $^\circ\text{C}$ )

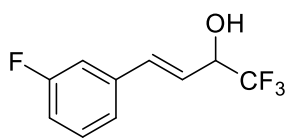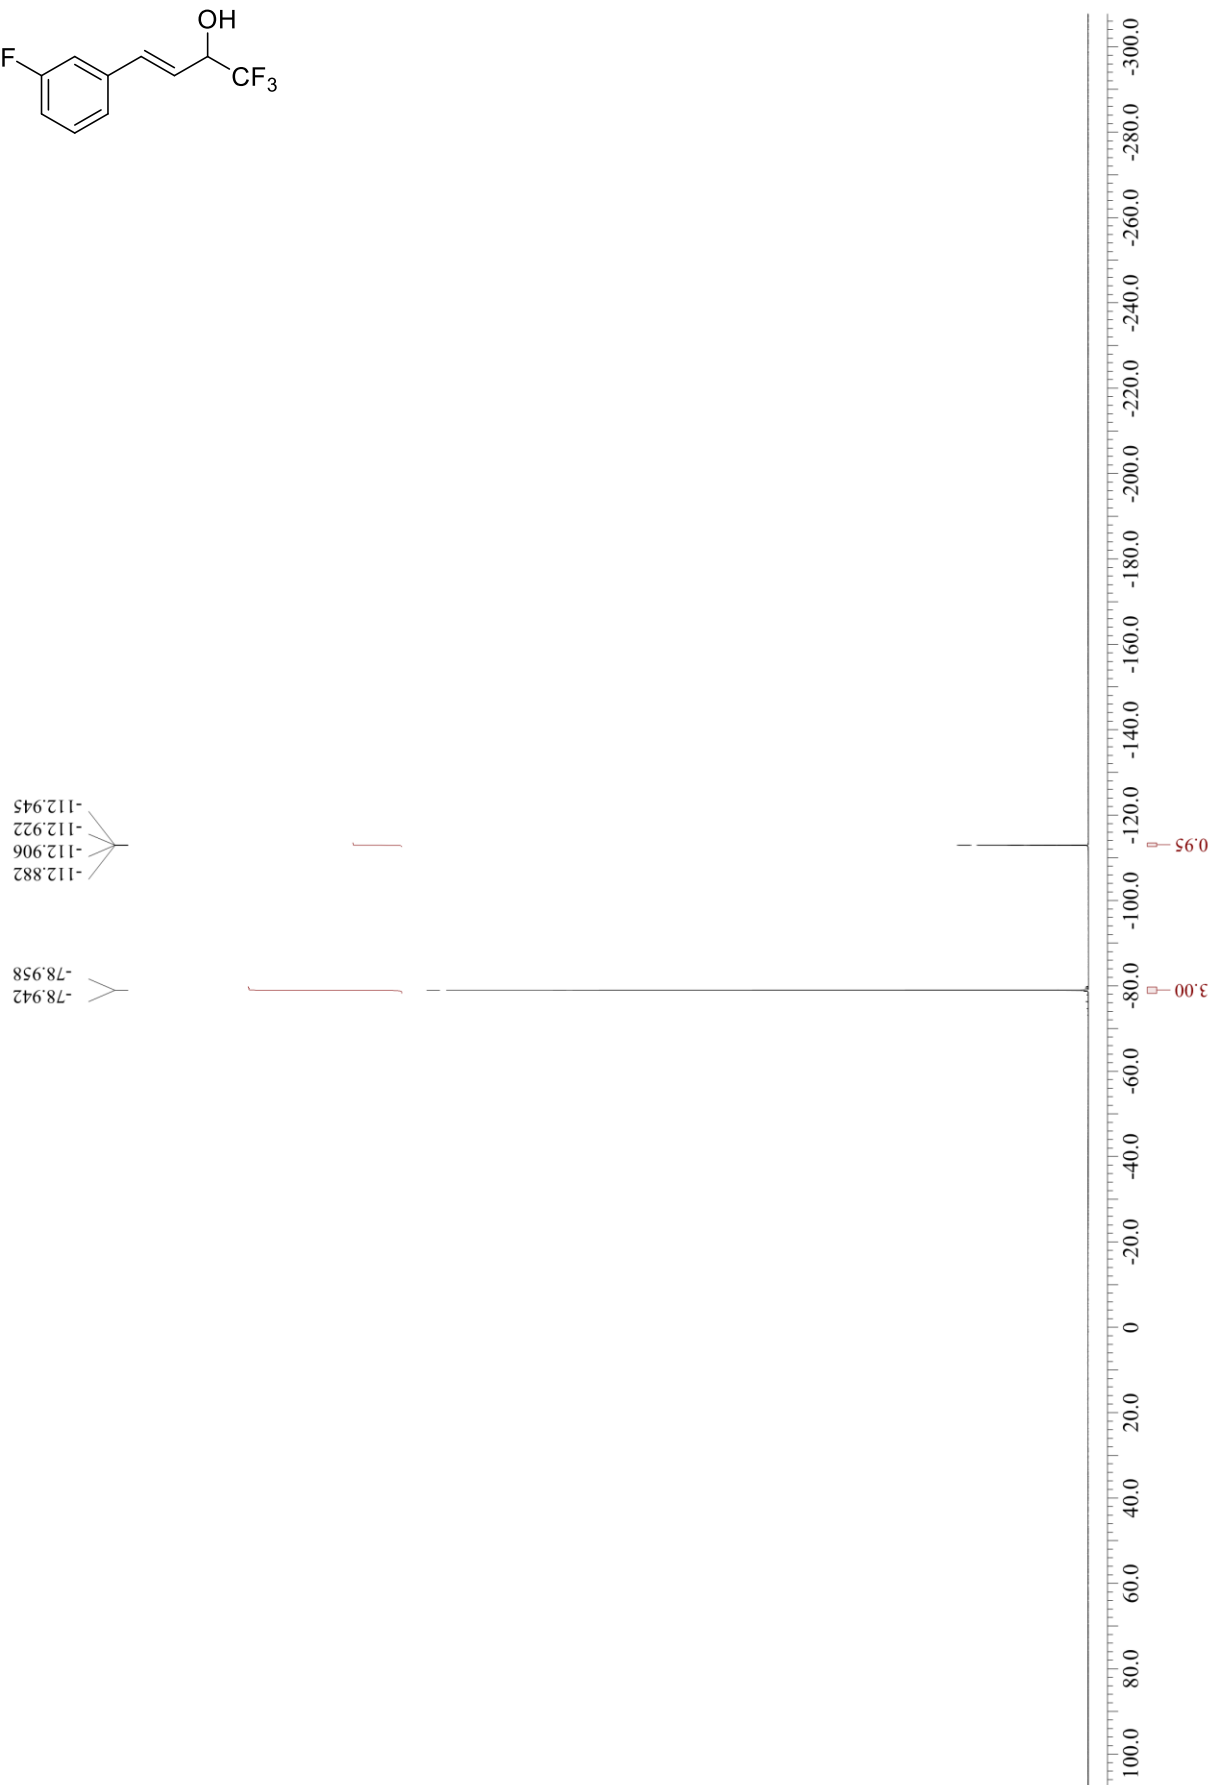



$^1\text{H}$  NMR of **13c** ( $\text{CDCl}_3$ , 400 MHz, 25  $^\circ\text{C}$ )

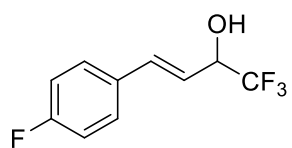

2.781

4.657  
4.641  
4.625  
4.609  
4.593

7.399  
7.384  
7.380  
7.365  
7.261  
7.057  
7.035  
7.013  
6.834  
6.795  
6.148  
6.131  
6.107  
6.091

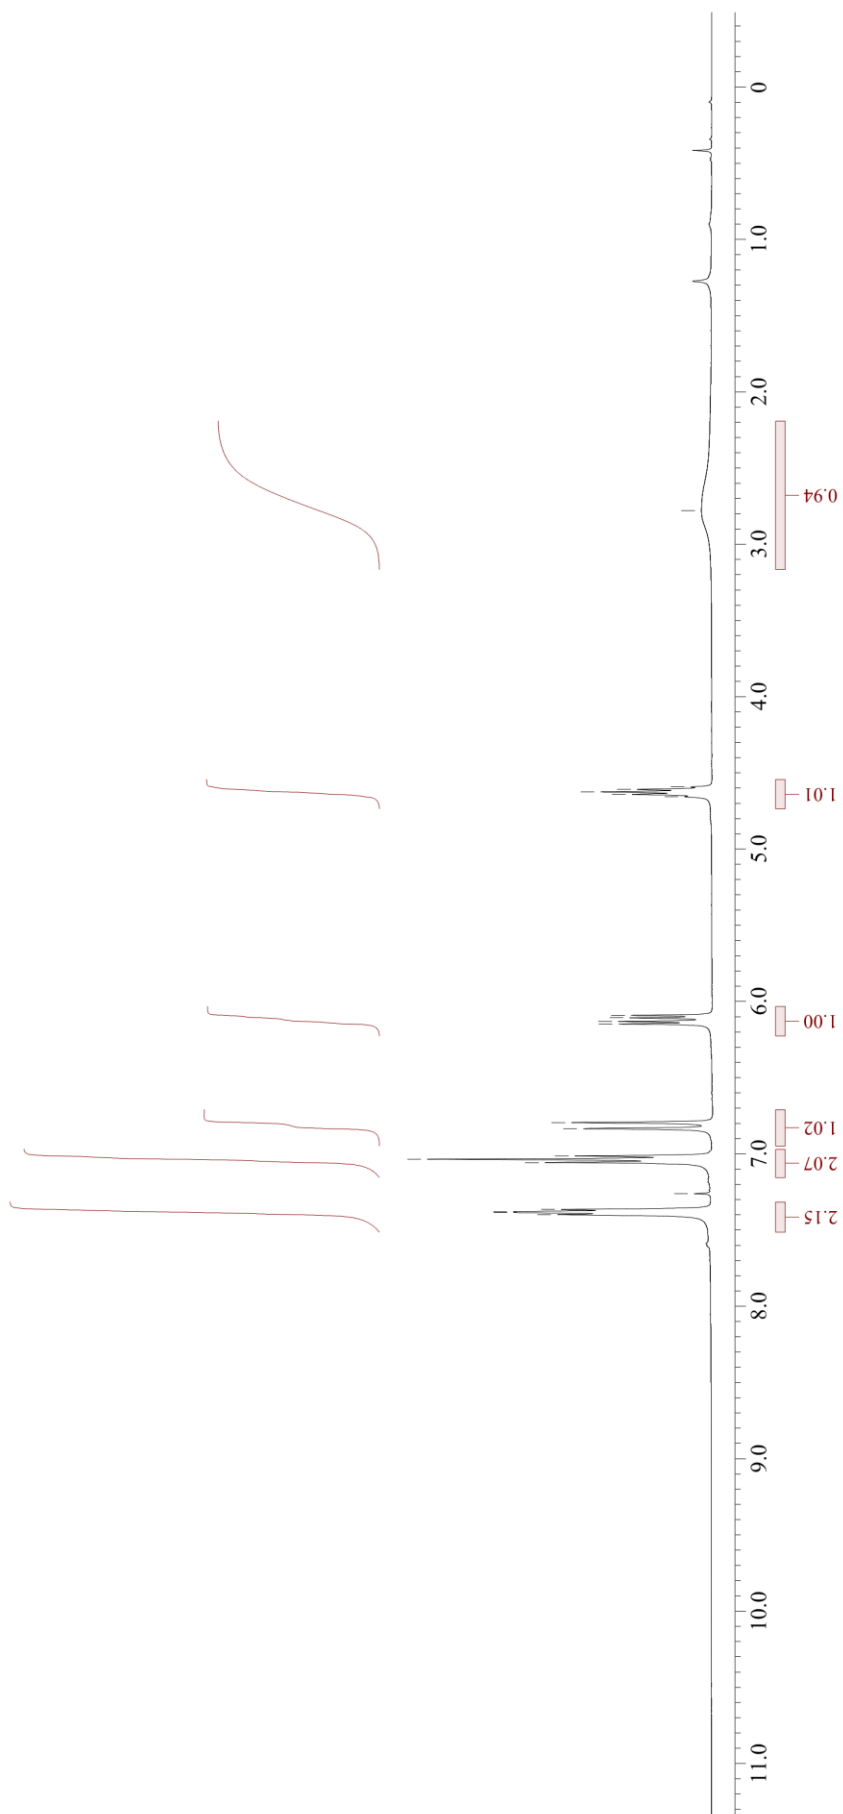

$^{13}\text{C}$  NMR of **13c** ( $\text{CDCl}_3$ , 100 MHz, 25 °C)

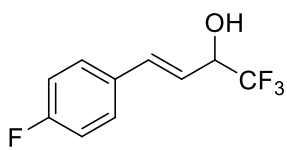

77.476  
77.160  
76.834  
72.129  
71.803  
71.487  
71.161

135.241  
131.676  
128.725  
128.638  
125.802  
122.994  
120.484  
120.196  
115.951  
115.740

164.334  
161.862

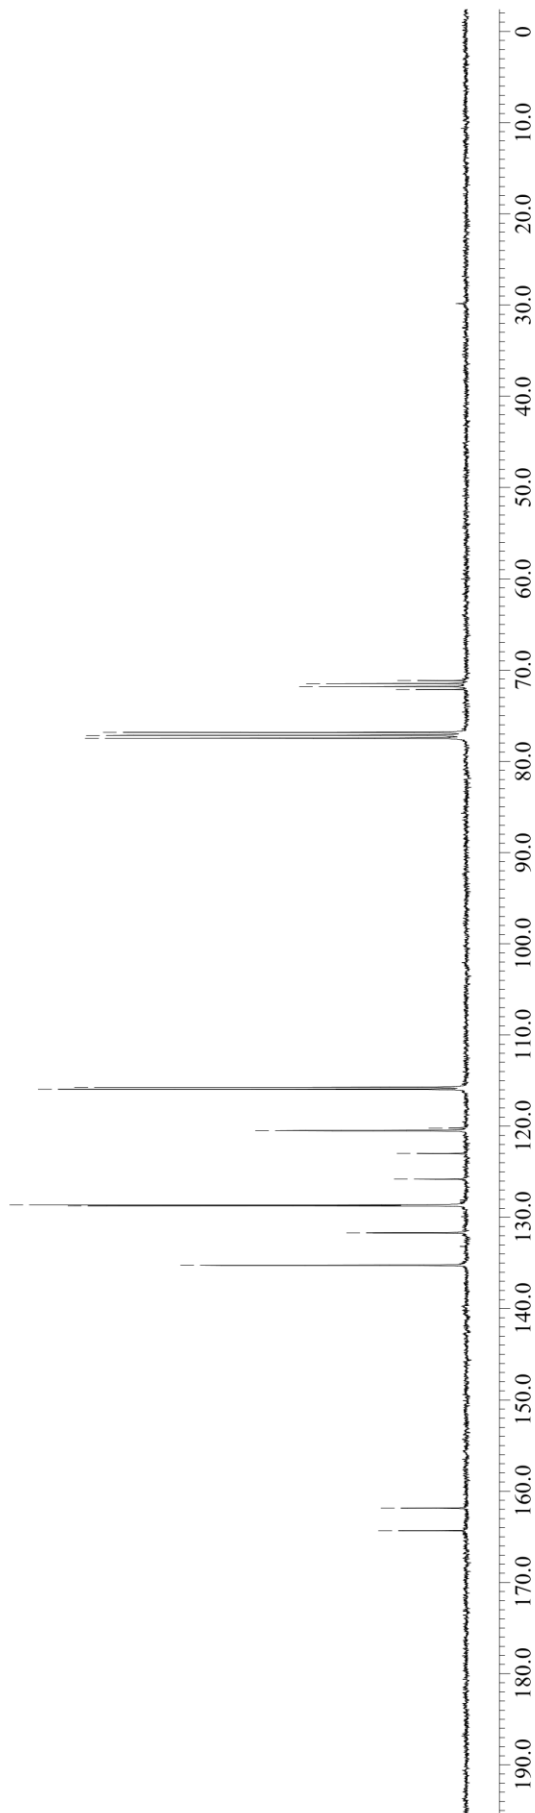

$^{19}\text{F}$  NMR of **13c** ( $\text{CDCl}_3$ , 375 MHz, 25 °C)

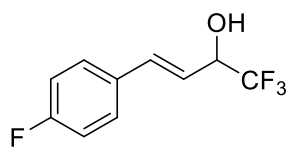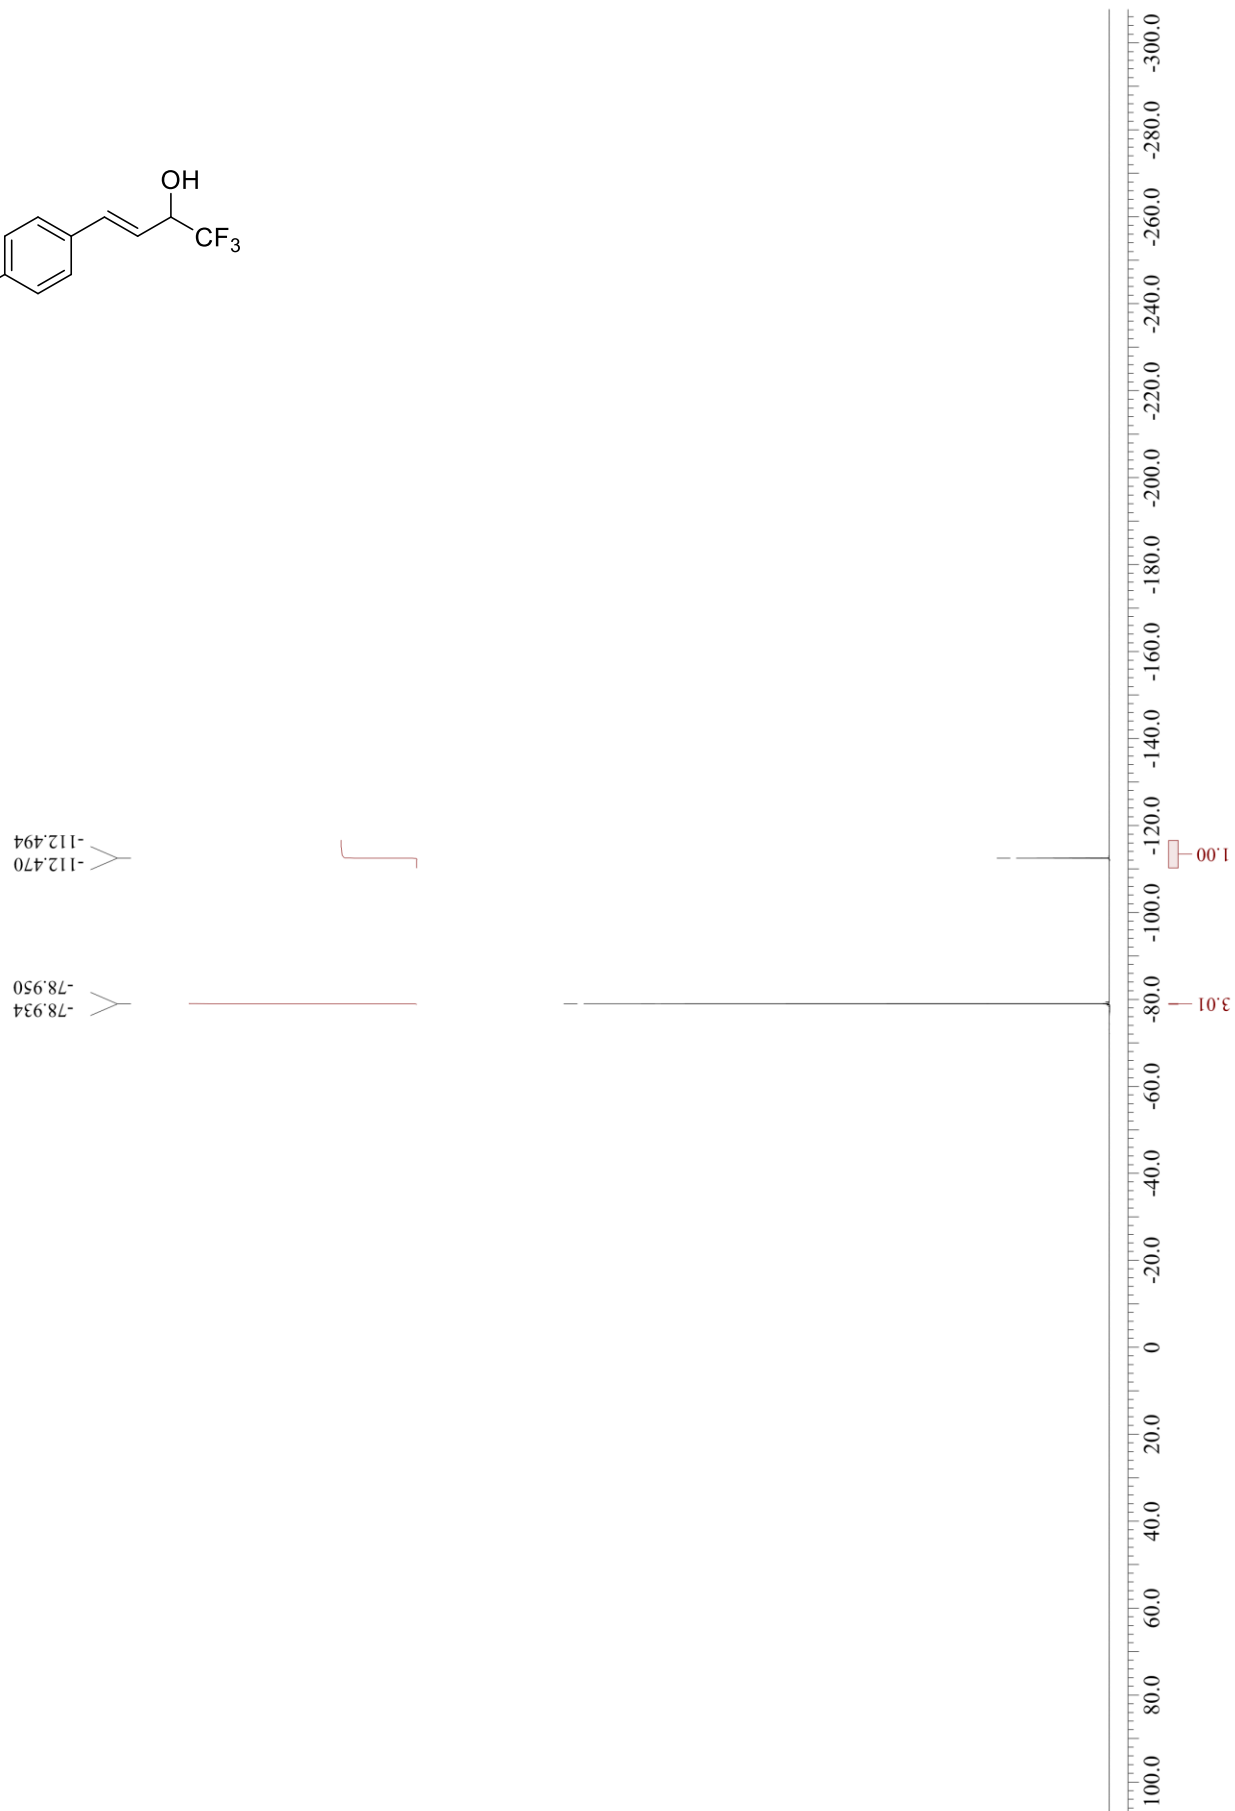

$^1\text{H}$  NMR of **13d** ( $\text{CDCl}_3$ , 400 MHz, 25 °C)

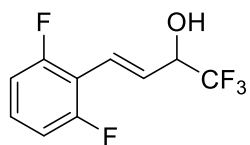

2.574  
2.587

4.648  
4.663

6.532  
6.548  
6.573  
6.588  
6.881  
6.903  
6.924  
6.949  
7.181  
7.197  
7.201  
7.217  
7.233  
7.238  
7.254  
7.261

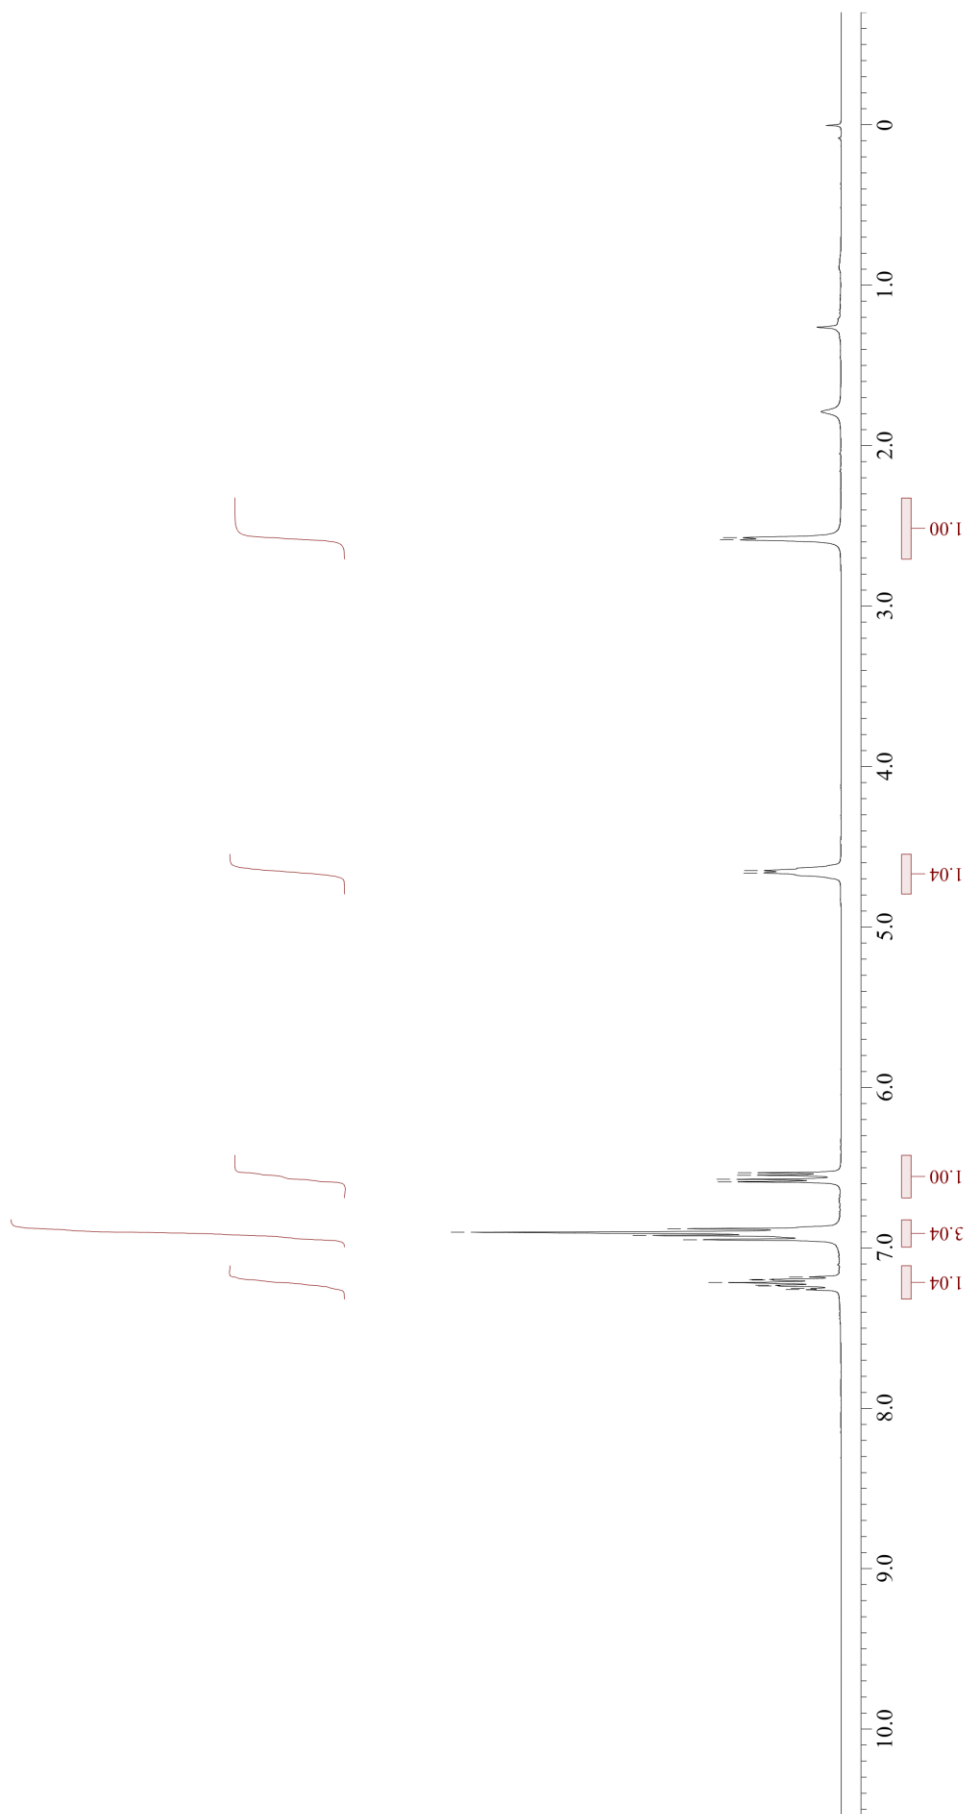

$^{13}\text{C}$  NMR of **13d** ( $\text{CDCl}_3$ , 100 MHz, 25 °C)

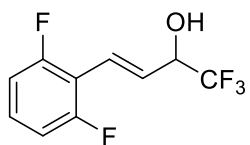

77.486  
77.160  
76.844  
72.637  
72.311  
71.995  
71.699

129.712  
129.597  
129.491  
128.504  
127.546  
127.469  
127.402  
125.706  
122.898  
122.630  
120.091  
113.191  
113.038  
112.894  
111.917  
111.859  
111.725  
111.658

162.513  
162.446  
160.003  
159.926

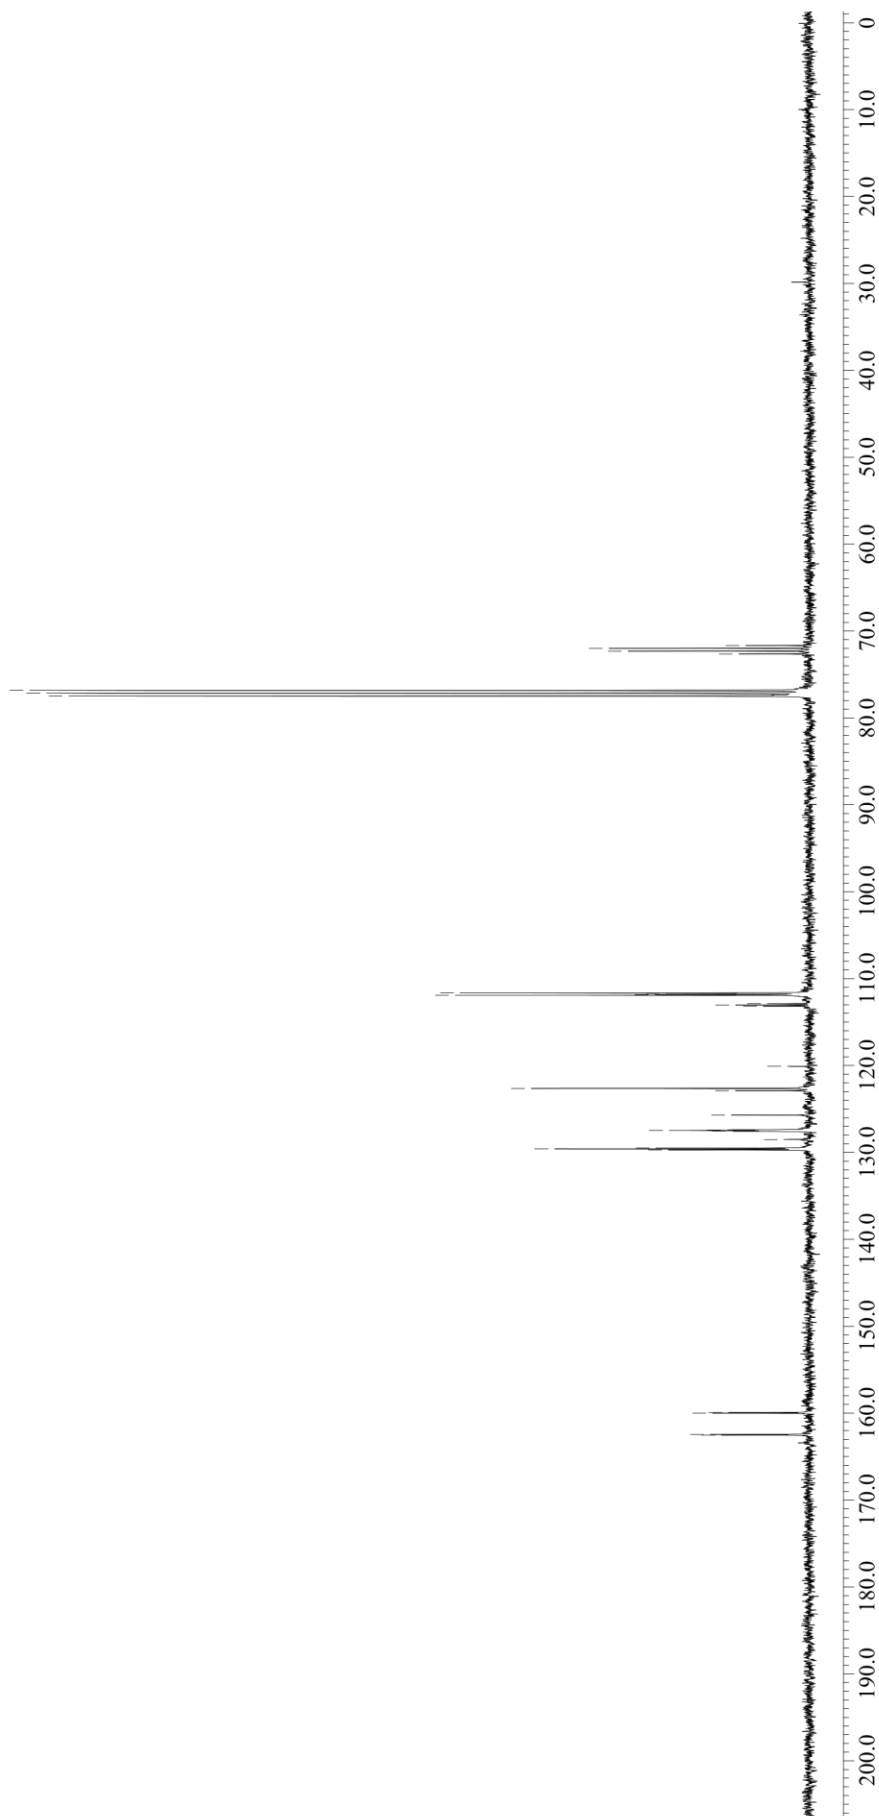

$^{19}\text{F}$  NMR of **13d** ( $\text{CDCl}_3$ , 375 MHz, 25 °C)

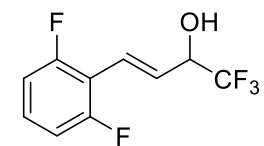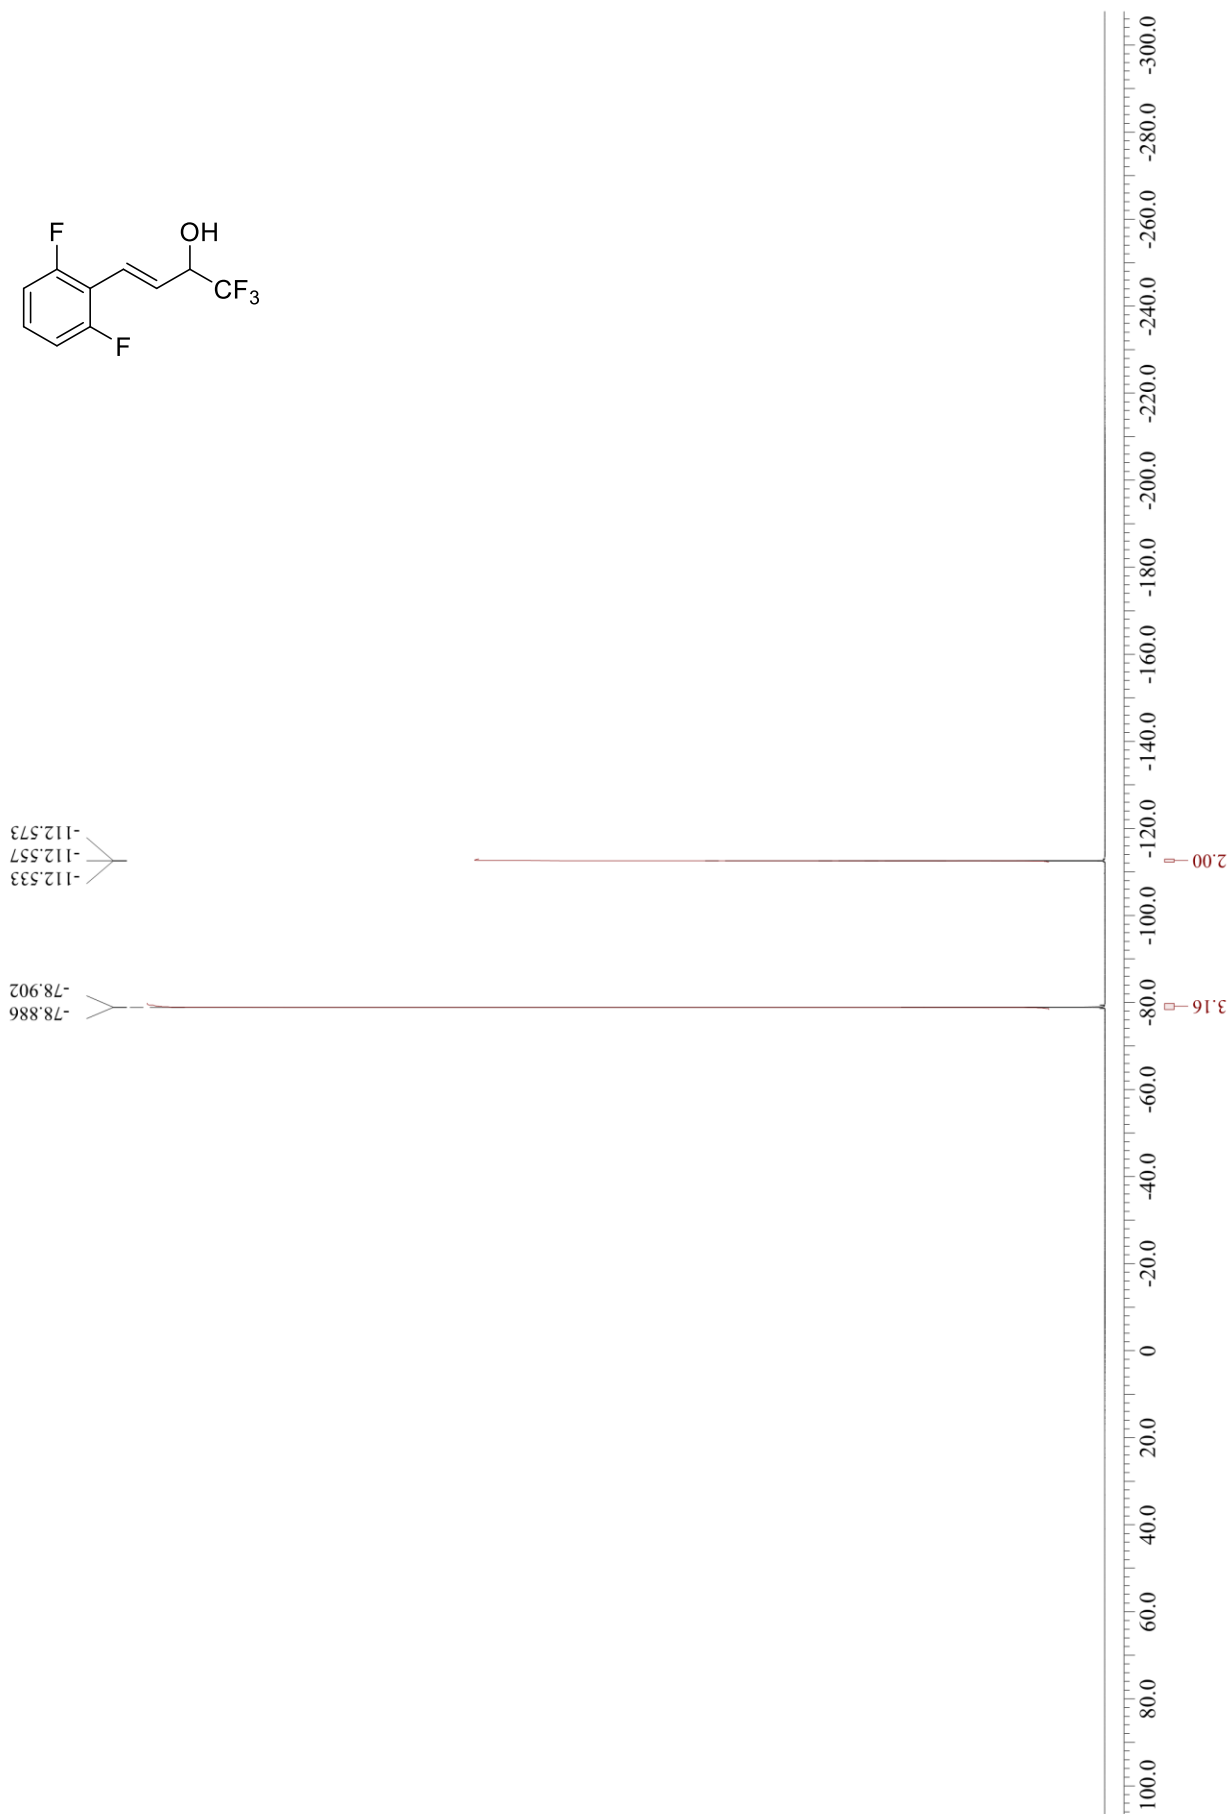

$^1\text{H}$  NMR of **13e** ( $\text{CDCl}_3$ , 600 MHz, 25  $^\circ\text{C}$ )

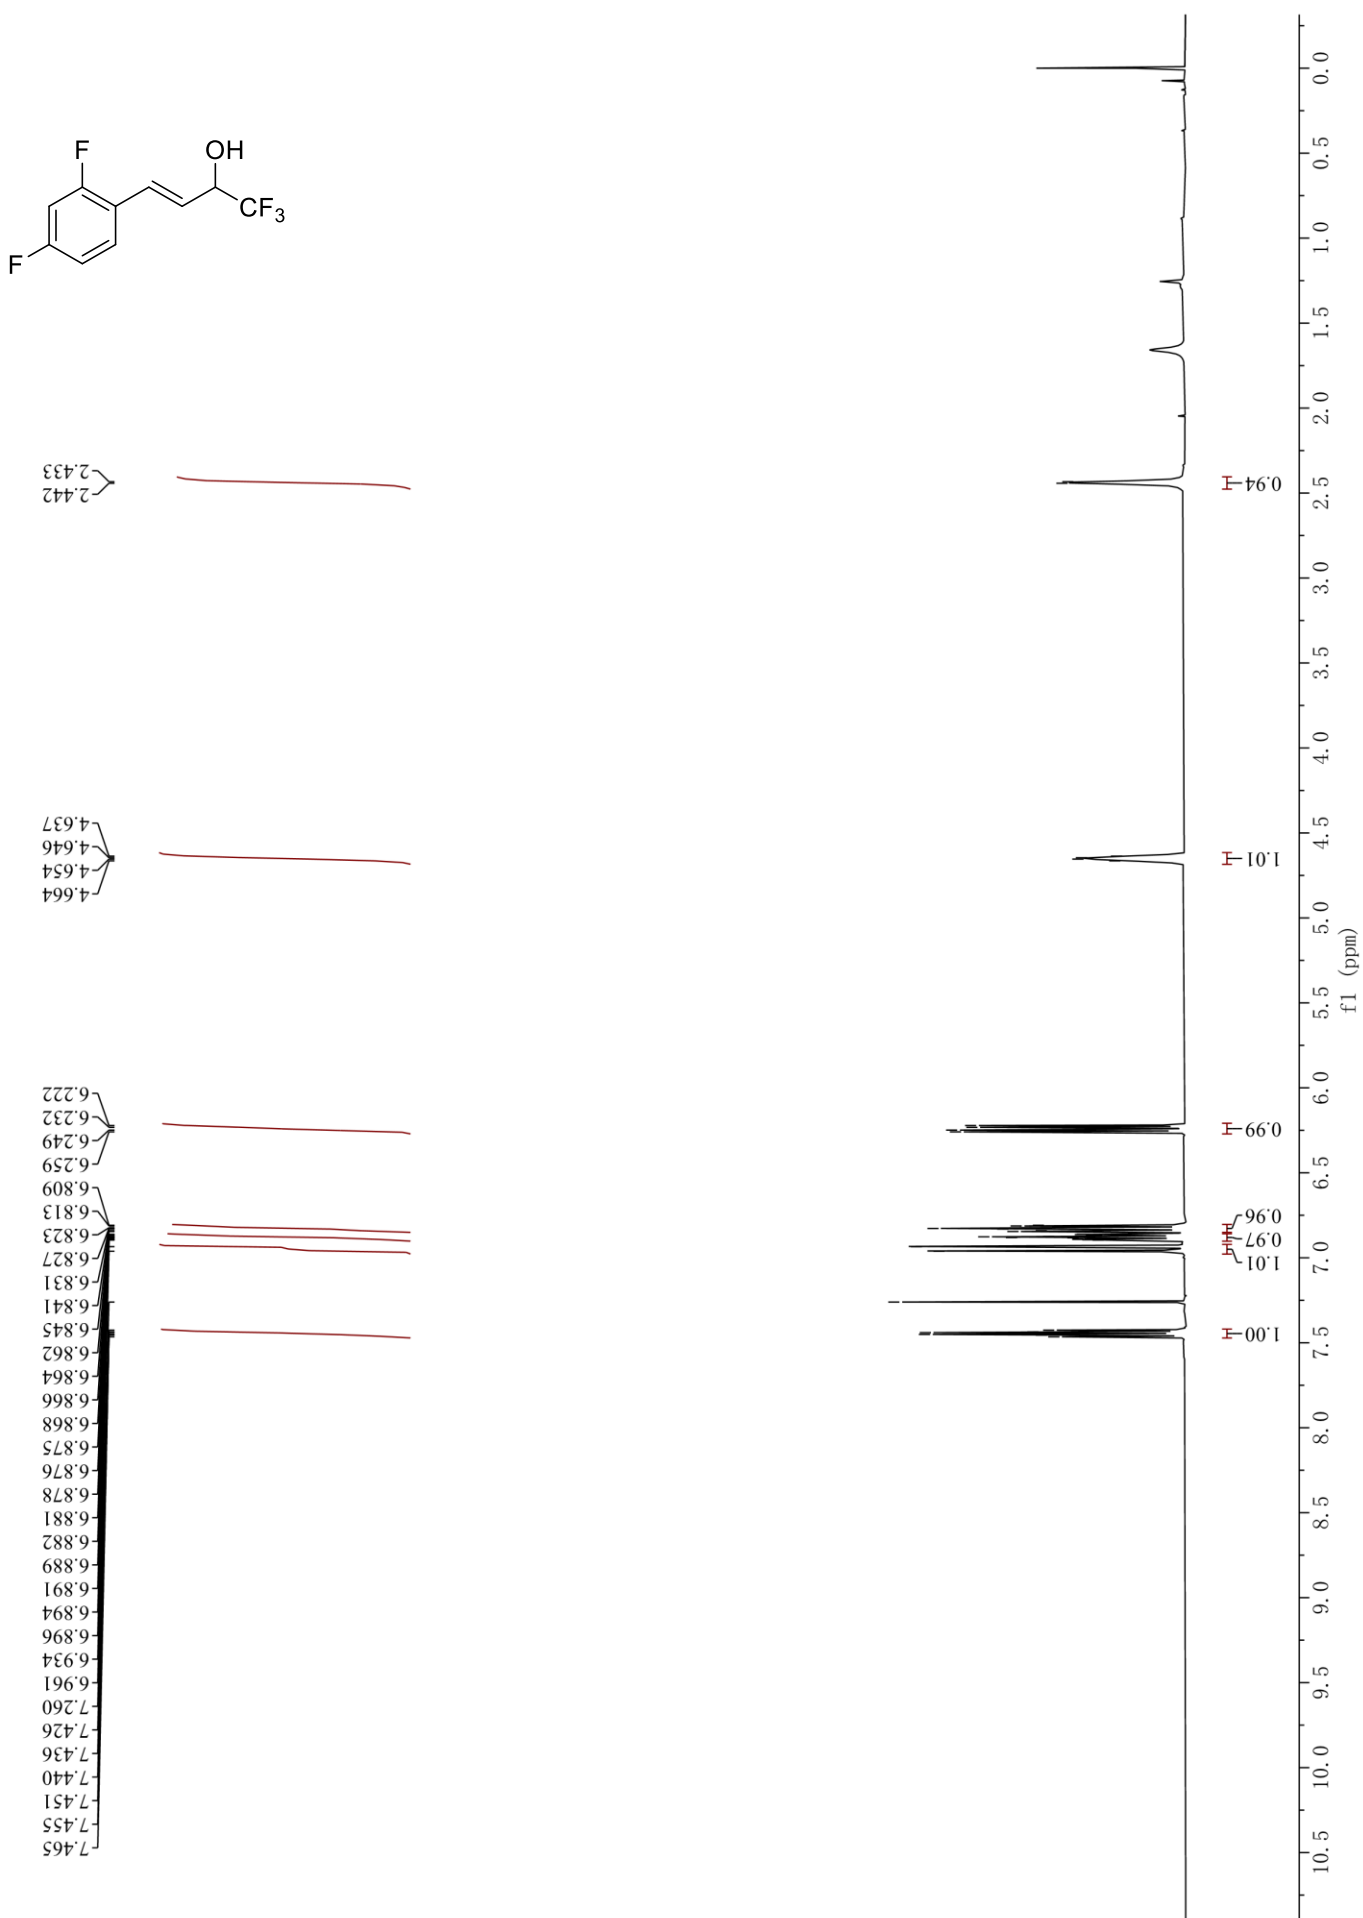

$^{13}\text{C}$  NMR of **13e** ( $\text{CDCl}_3$ , 150 MHz, 25 °C)

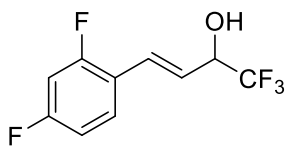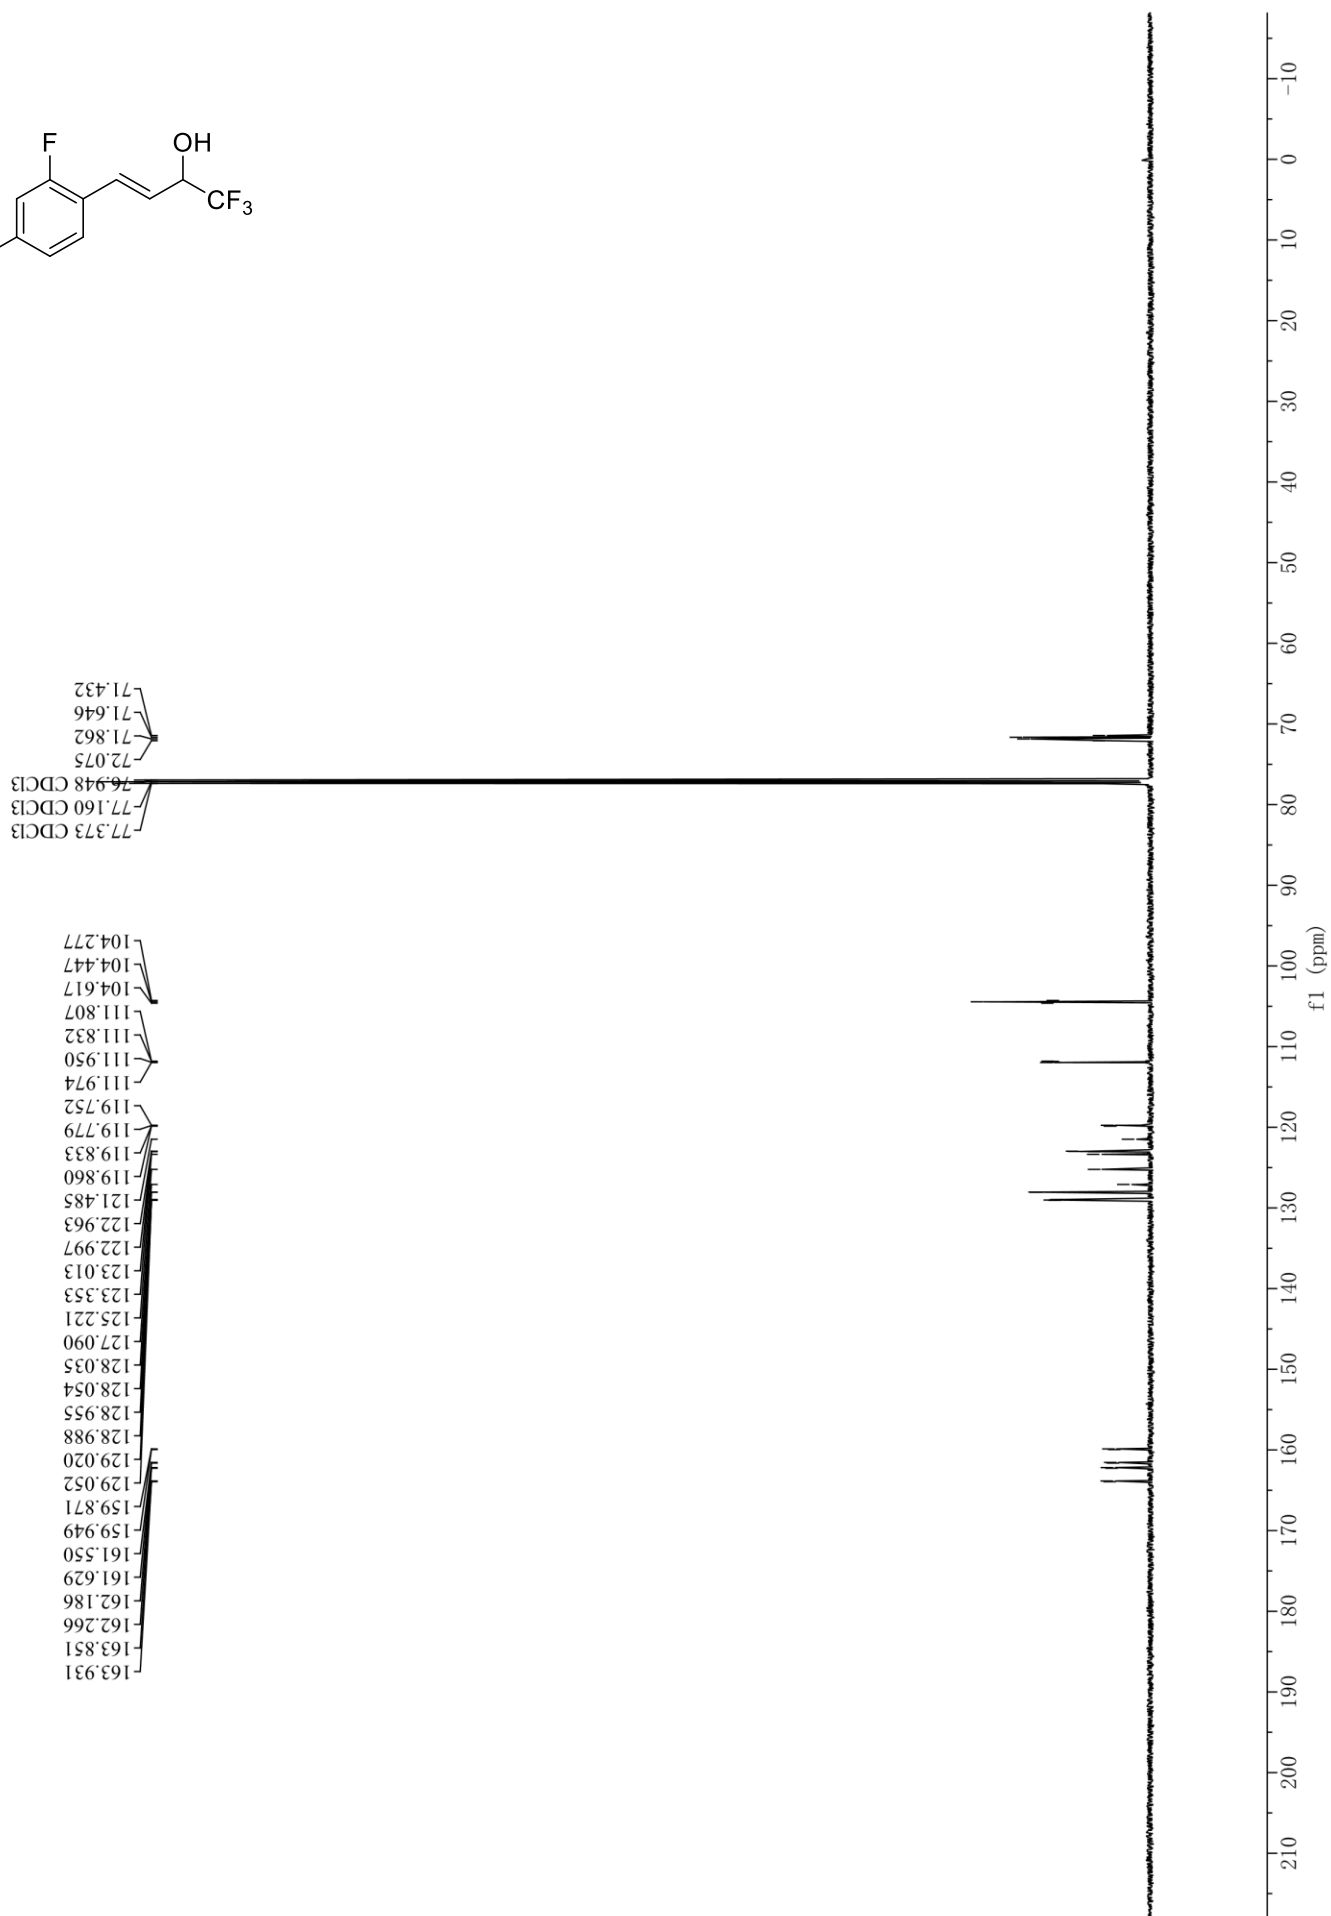



$^{19}\text{F}$  NMR of **13e** ( $\text{CDCl}_3$ , 375 MHz, 25 °C)

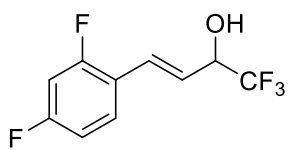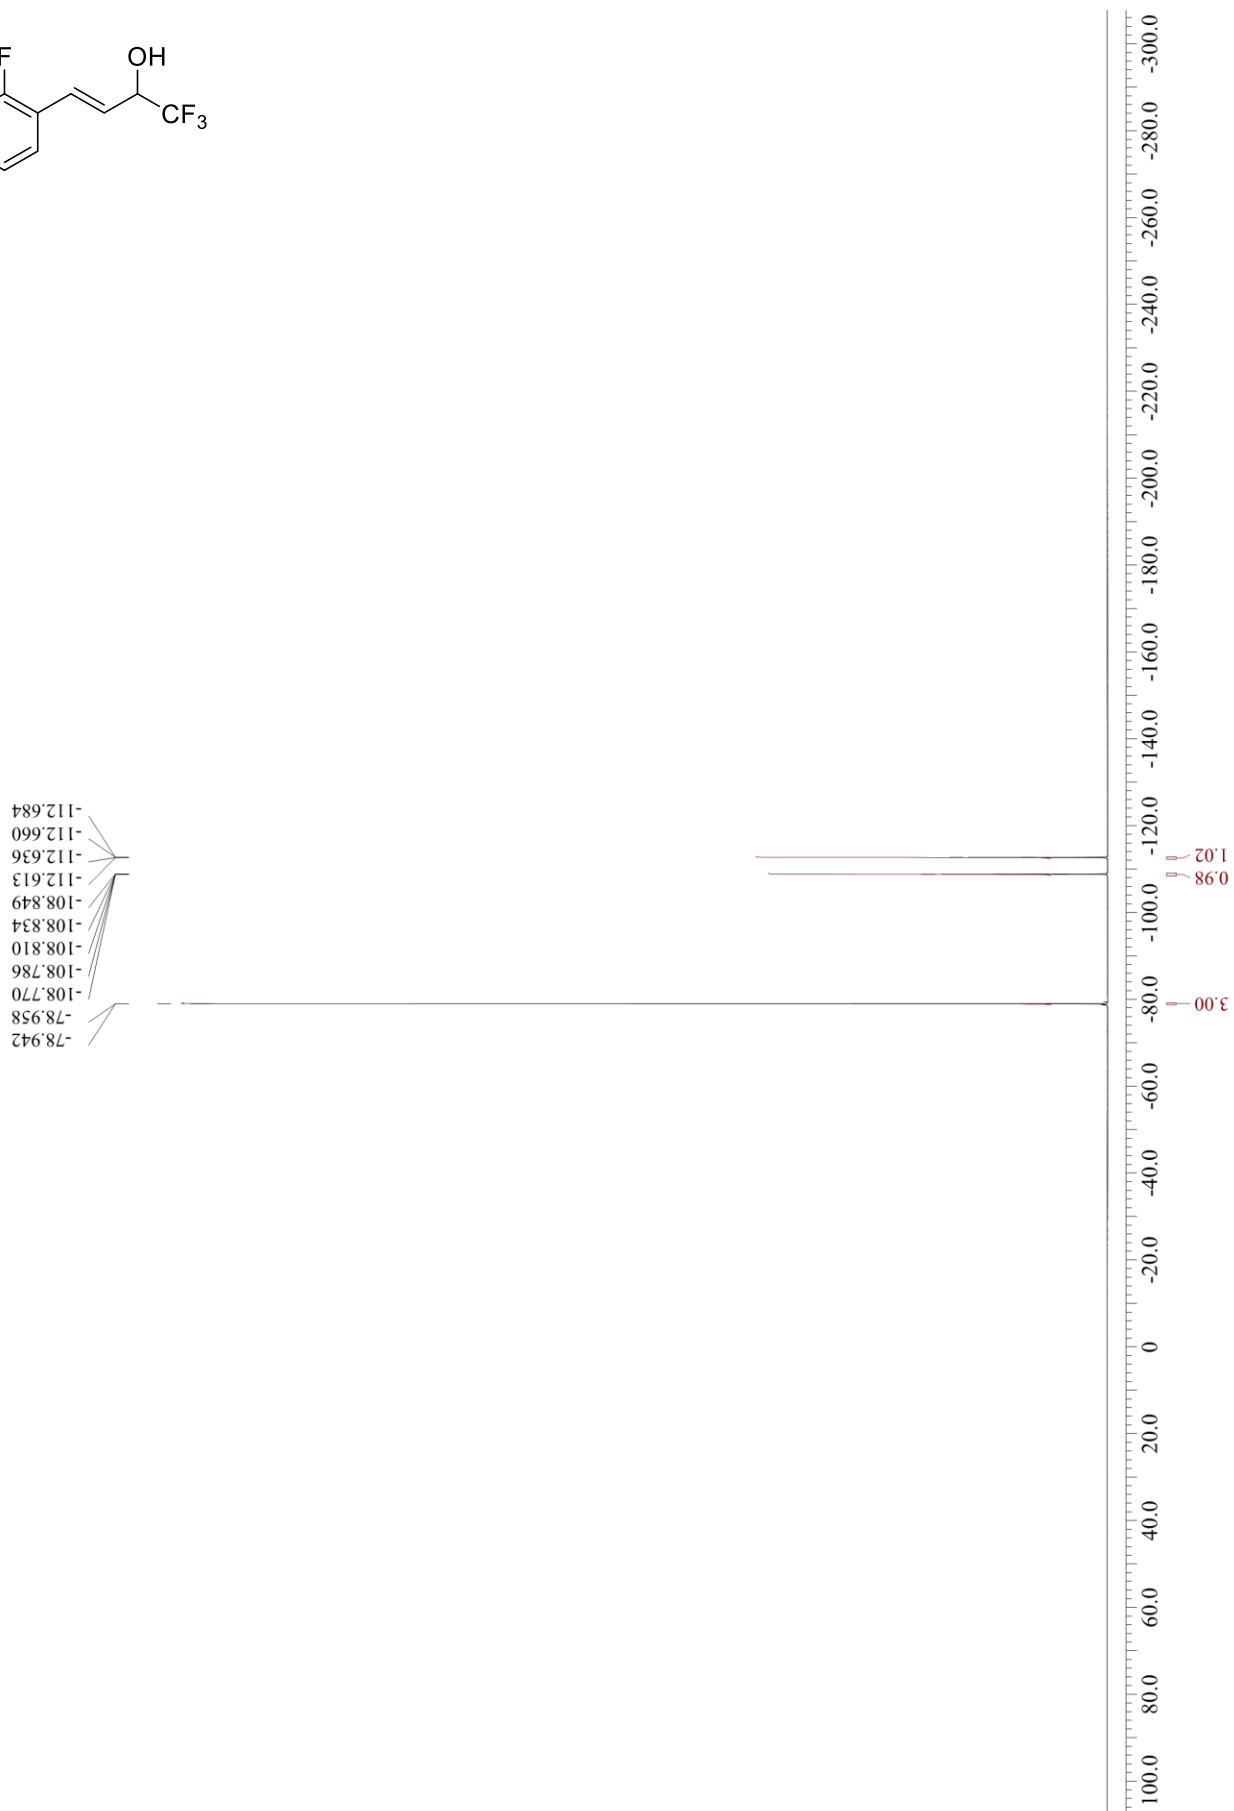

$^1\text{H}$  NMR of **13f** ( $\text{CDCl}_3$ , 600 MHz, 25  $^\circ\text{C}$ )

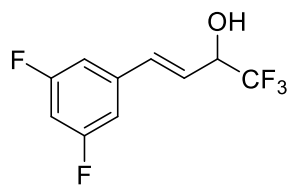

2.547

4.653  
4.656  
4.664  
4.666  
4.675  
4.677

6.199  
6.208  
6.225  
6.235  
6.735  
6.739  
6.743  
6.750  
6.754  
6.758  
6.765  
6.768  
6.772  
6.788  
6.815  
6.918  
6.921  
6.924  
6.929  
6.932  
6.935  
7.261

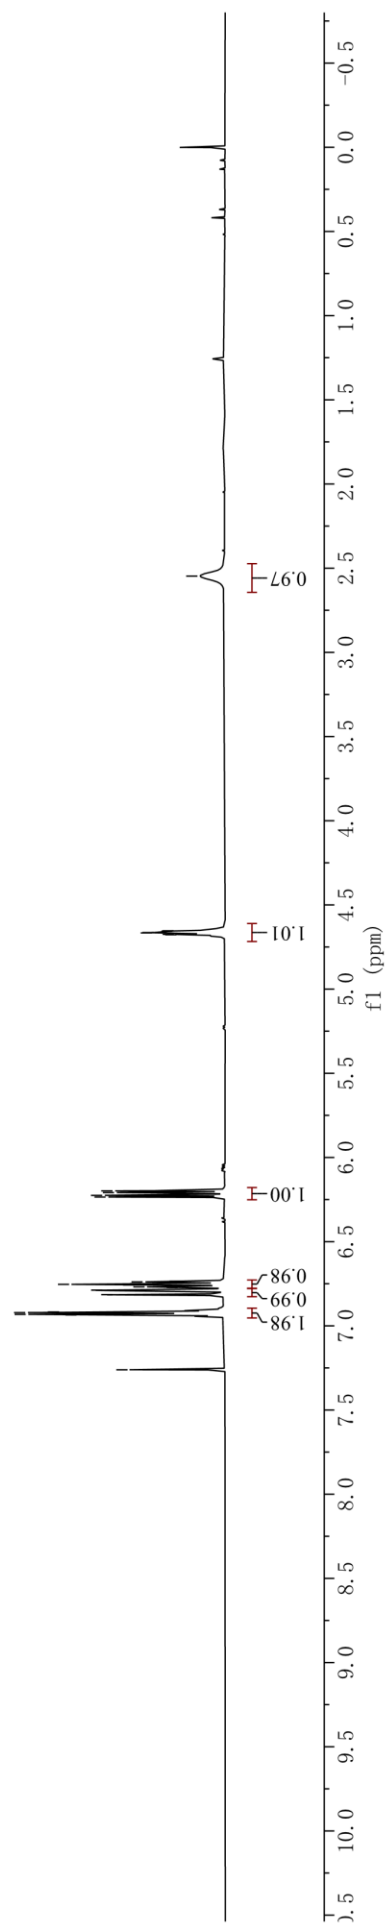

$^{13}\text{C}$  NMR of **13f** ( $\text{CDCl}_3$ , 150 MHz, 25 °C)

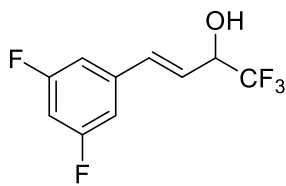

77.370  
77.159  
76.947  
71.493  
71.277  
71.061  
70.847

138.893  
138.831  
138.766  
133.977  
133.959  
133.940  
126.997  
125.129  
123.491  
123.259  
121.390  
109.869  
109.835  
109.735  
109.700  
104.228  
104.060  
103.890

164.230  
164.143  
162.583  
162.497

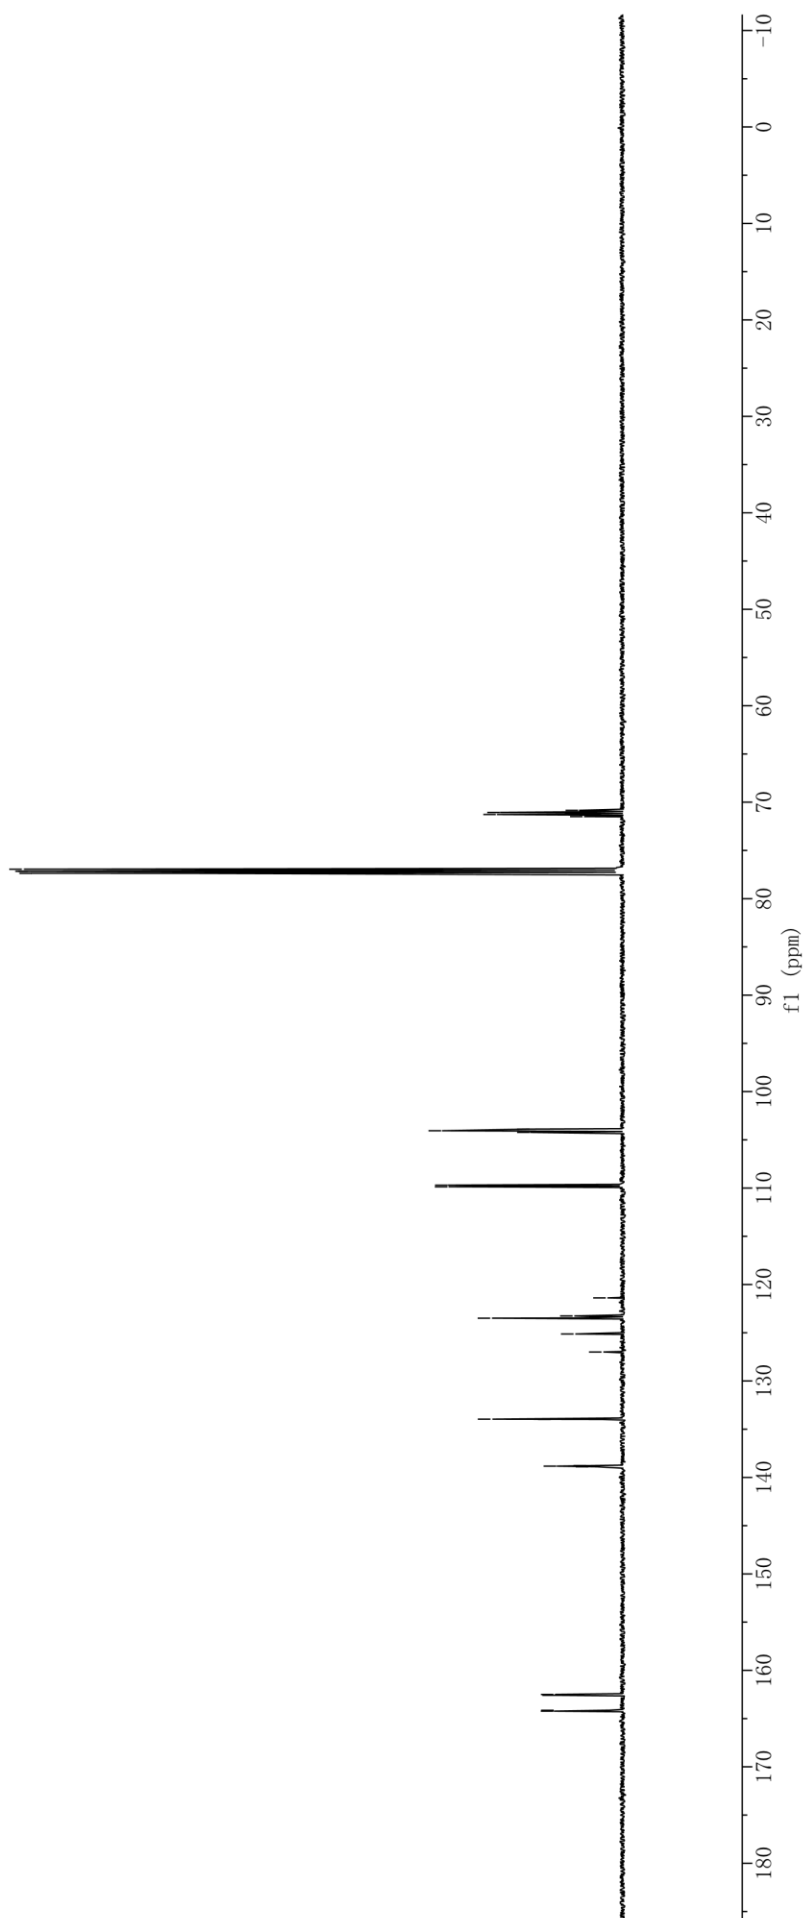

$^{19}\text{F}$  NMR of **13f** ( $\text{CDCl}_3$ , 375 MHz, 25 °C)

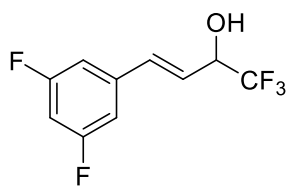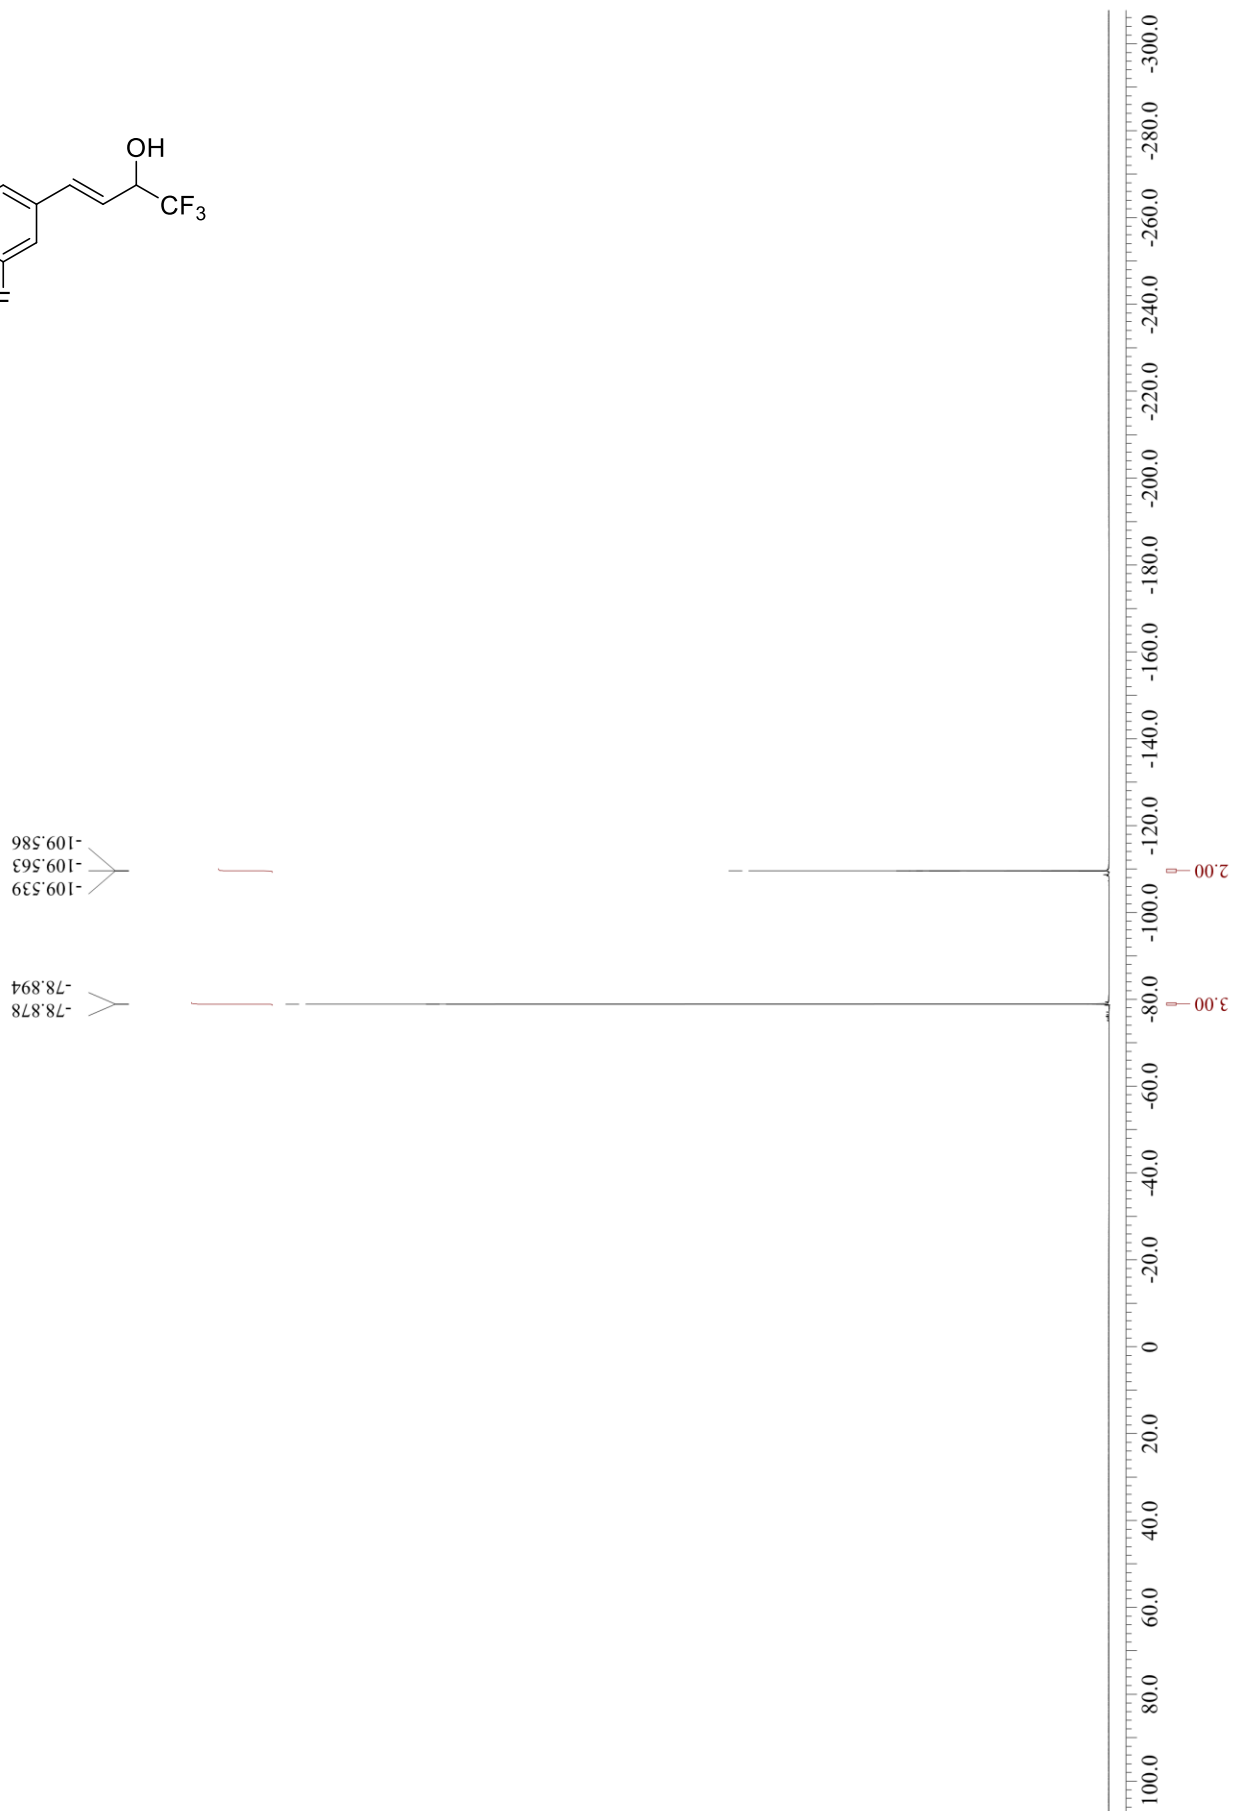

$^1\text{H}$  NMR of **13g** ( $\text{CDCl}_3$ , 400 MHz, 25 °C)

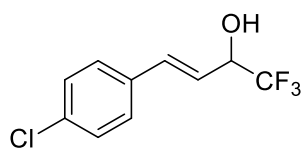

2.436  
2.446

4.634  
4.645

6.152  
6.167  
6.191  
6.207  
6.803  
6.843  
7.261  
7.308  
7.330  
7.341  
7.363

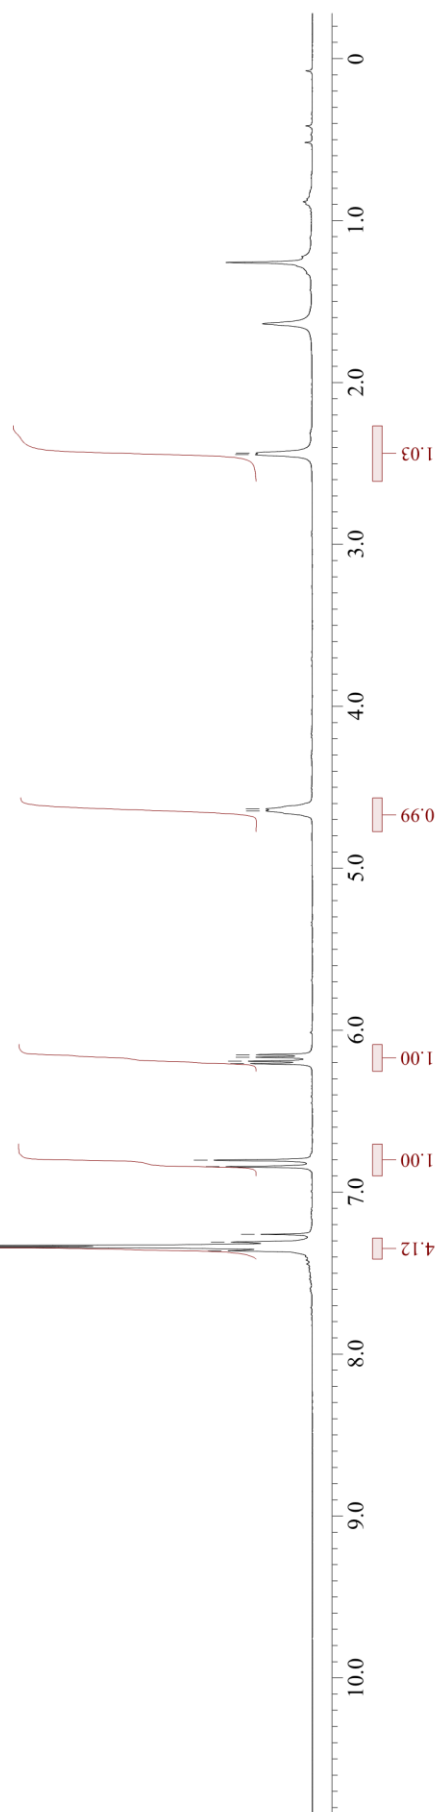

$^{13}\text{C}$  NMR of **13g** ( $\text{CDCl}_3$ , 100 MHz, 25 °C)

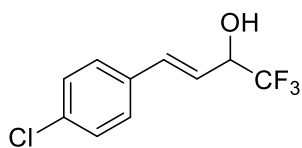

77.476  
77.160  
76.844  
72.052  
71.736  
71.410  
71.085

135.049  
134.656  
134.014  
129.089  
128.543  
128.246  
125.735  
122.927  
121.423  
120.129

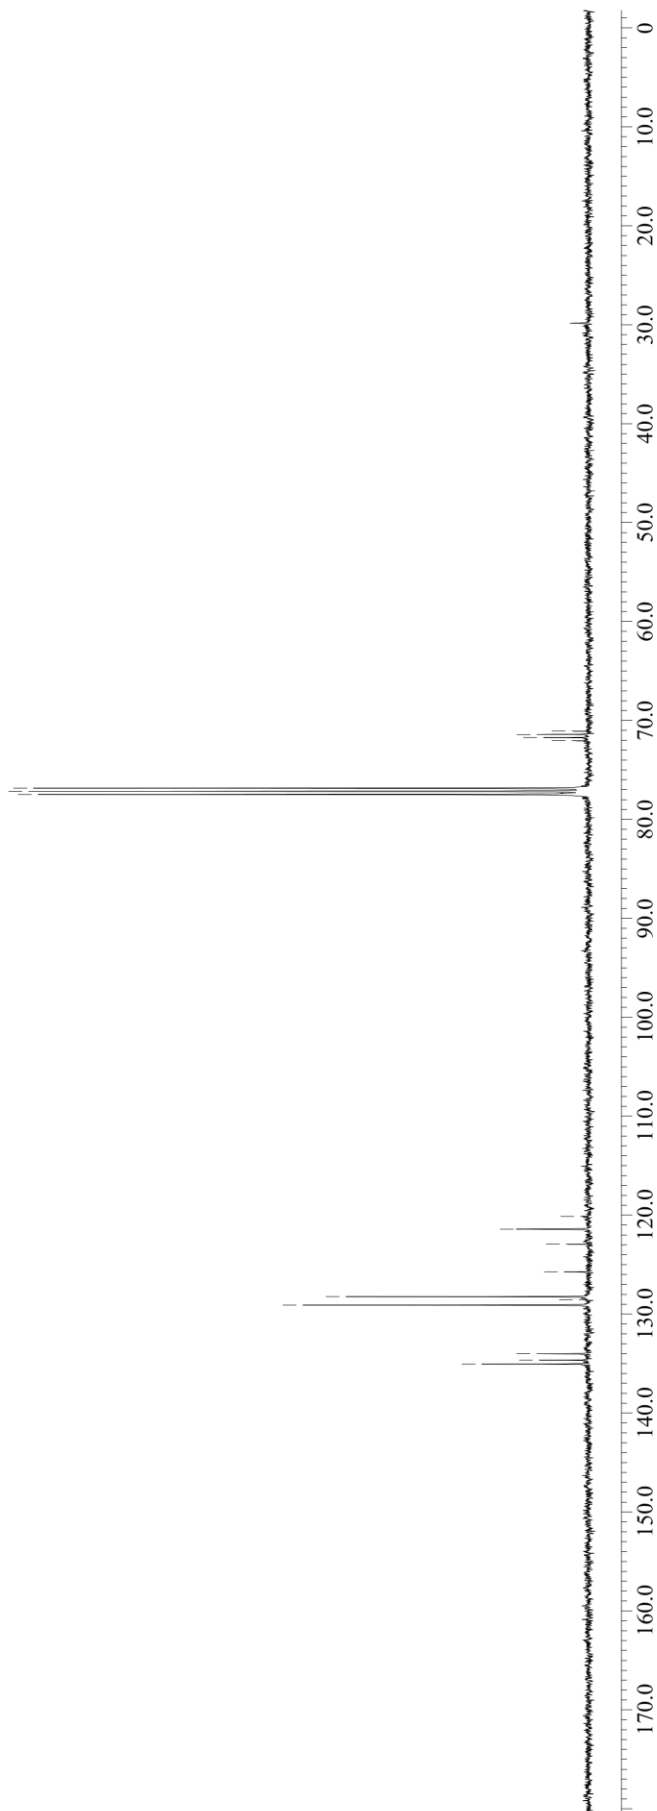

$^{19}\text{F}$  NMR of **13g** ( $\text{CDCl}_3$ , 375 MHz, 25 °C)

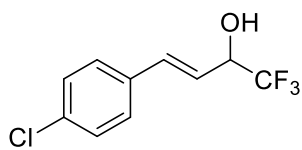

-78.958  
-78.942

100.0 80.0 60.0 40.0 20.0 0 -20.0 -40.0 -60.0 -80.0 -100.0 -120.0 -140.0 -160.0 -180.0 -200.0 -220.0 -240.0 -260.0 -280.0 -300.0

$^1\text{H}$  NMR of **13h** ( $\text{CDCl}_3$ , 400 MHz, 25  $^\circ\text{C}$ )

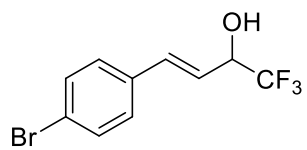

2.465

4.635

6.166  
6.182  
6.207  
6.222  
6.787  
6.827  
7.261  
7.272  
7.293  
7.467  
7.488

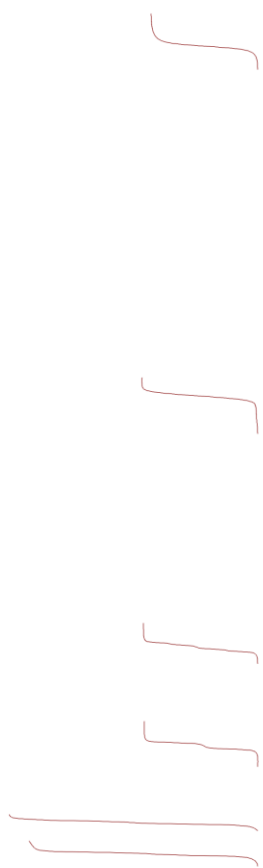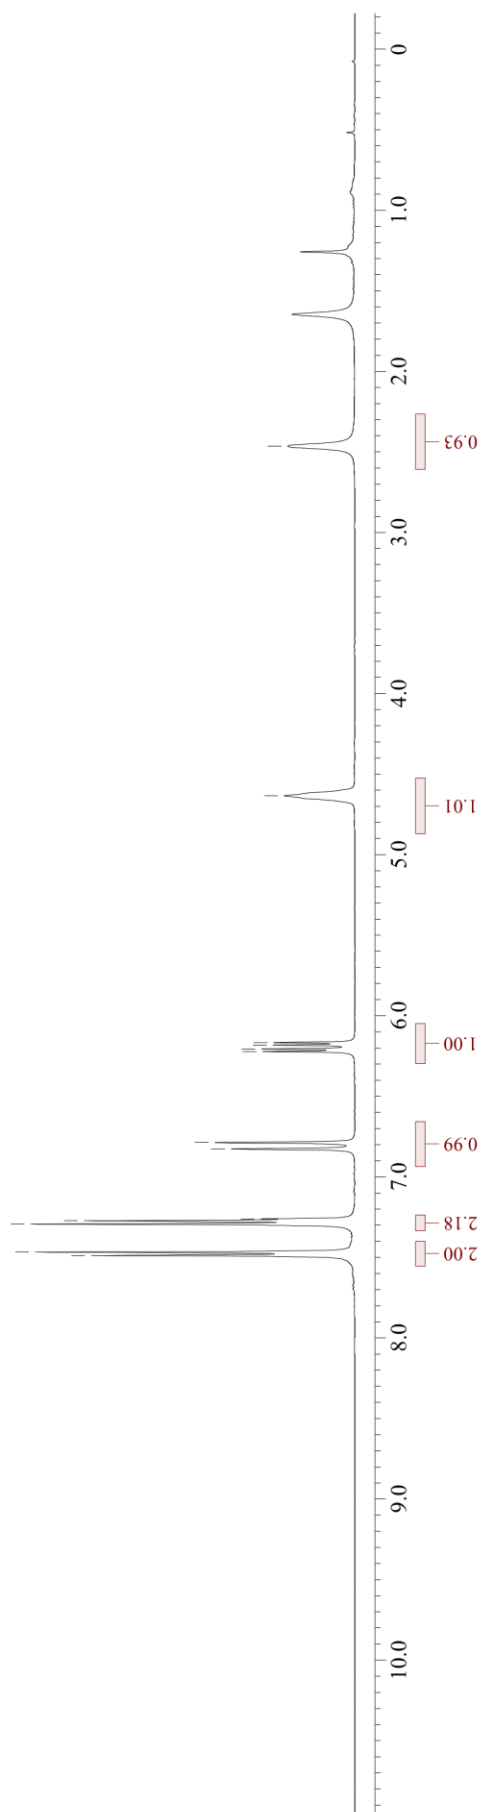



$^{13}\text{C}$  NMR of **13h** ( $\text{CDCl}_3$ , 100 MHz, 25 °C)

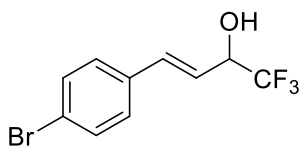

77.476  
77.160  
76.844  
72.043  
71.717  
71.401  
71.075

135.088  
134.455  
132.050  
128.523  
128.418  
125.706  
122.898  
122.841  
121.547  
120.100

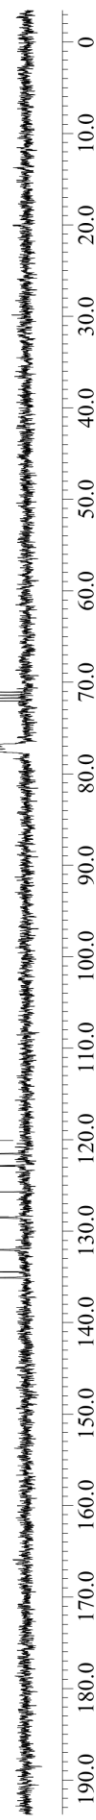

$^{19}\text{F}$  NMR of **13h** ( $\text{CDCl}_3$ , 375 MHz, 25 °C)

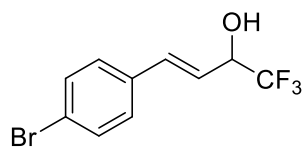

-78.942  
-78.926

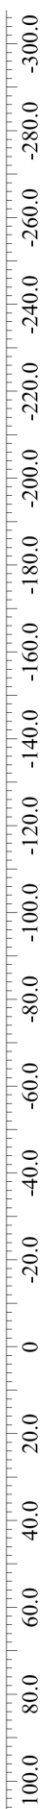

$^1\text{H}$  NMR of **13i** ( $\text{CDCl}_3$ , 400 MHz, 25  $^\circ\text{C}$ )

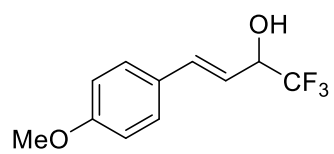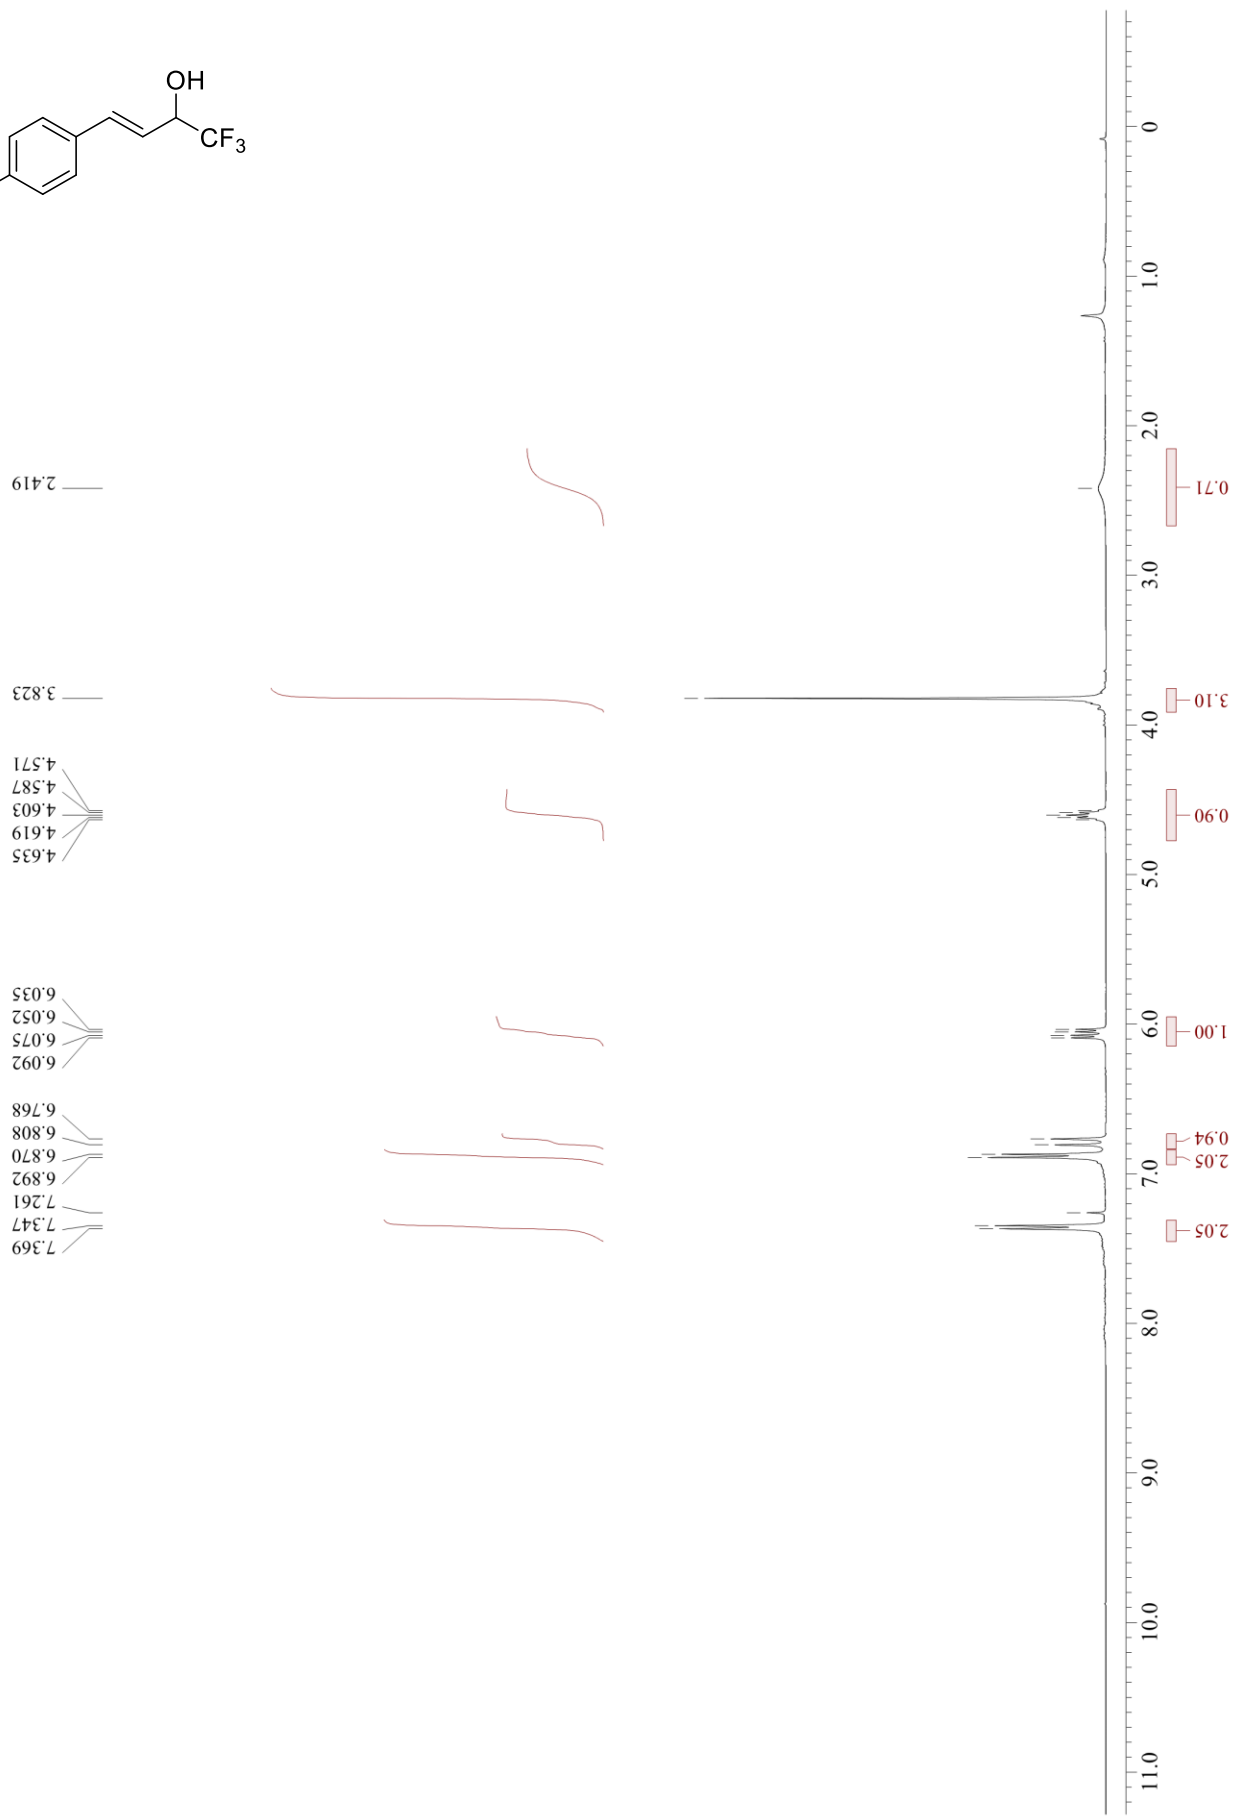

$^{13}\text{C}$  NMR of **13i** ( $\text{CDCl}_3$ , 100 MHz, 25 °C)

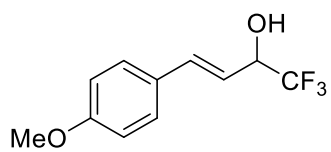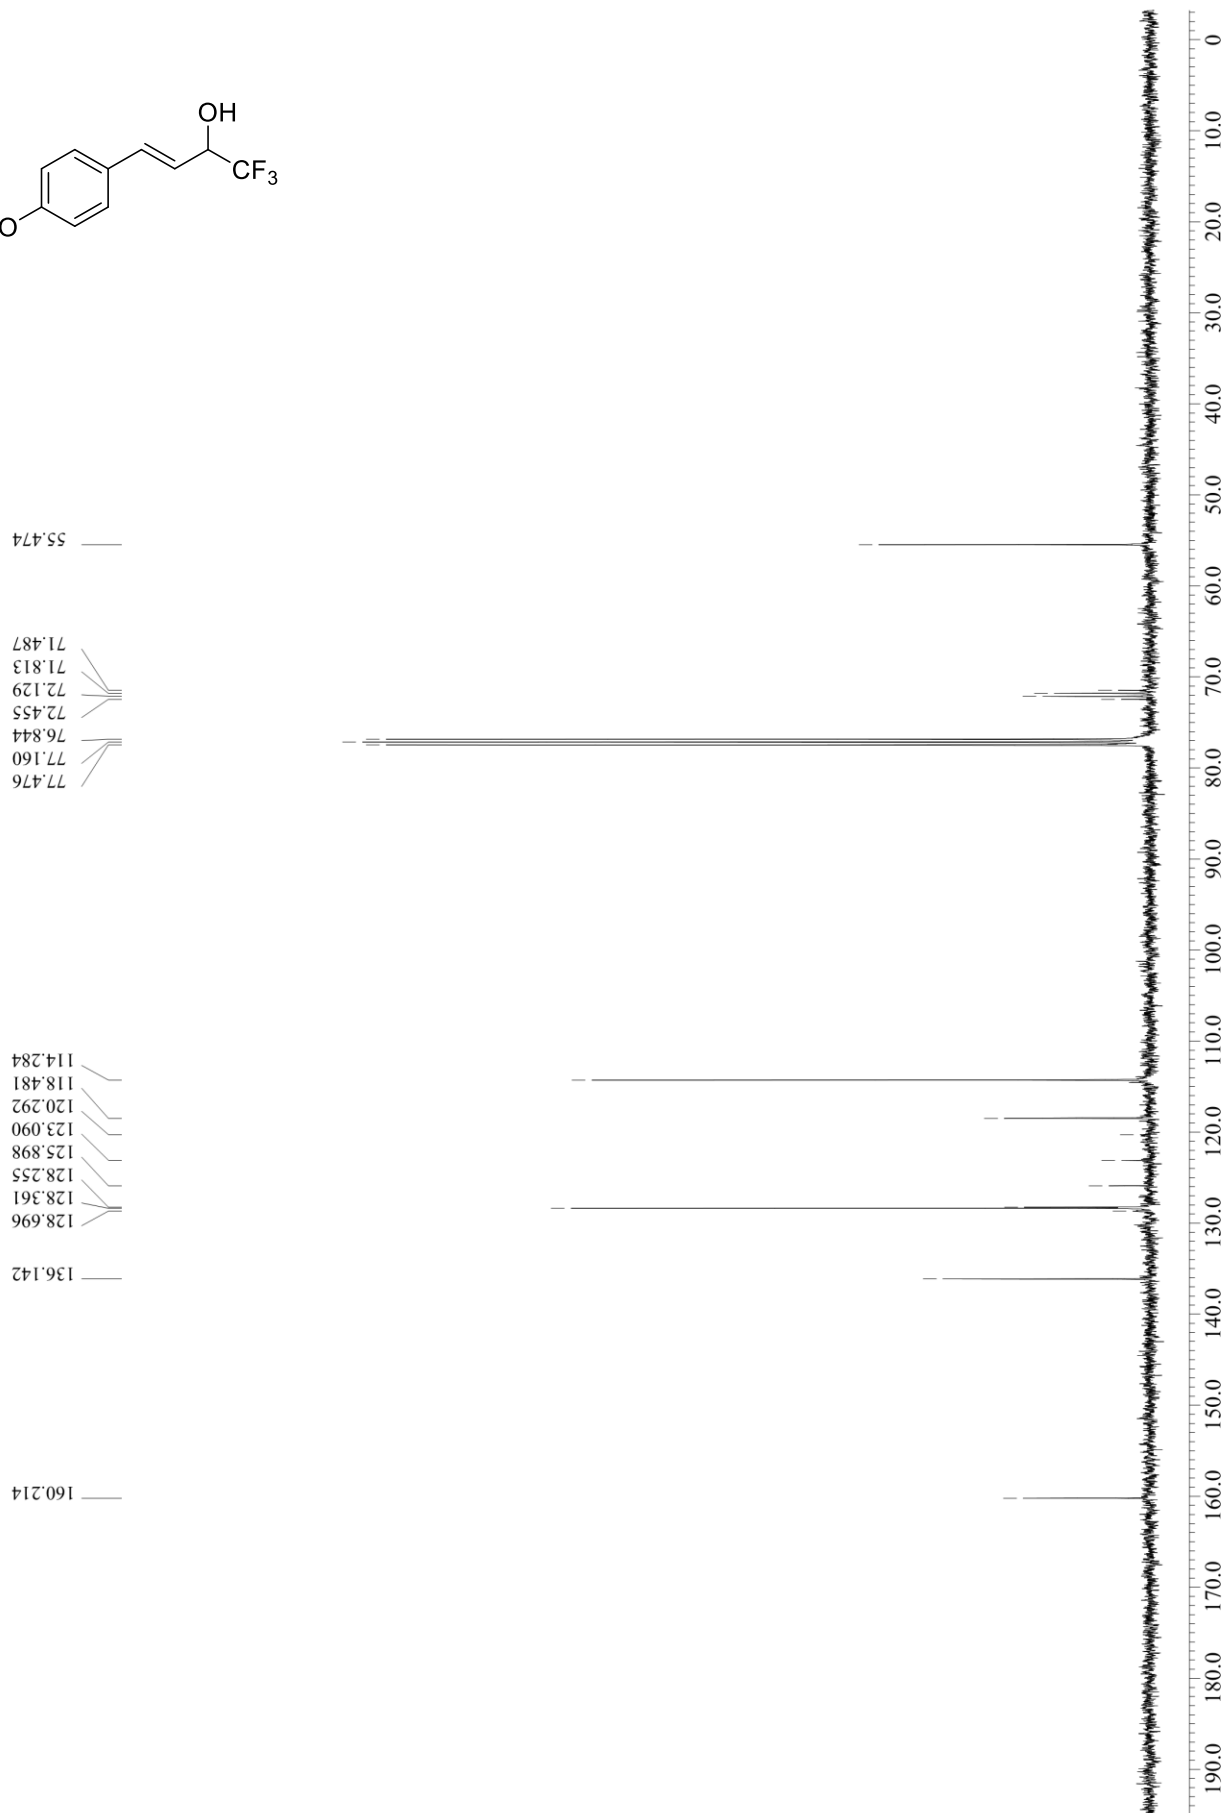

$^{19}\text{F}$  NMR of **13i** ( $\text{CDCl}_3$ , 375 MHz, 25 °C)

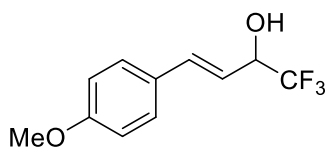

-78.981  
-78.997

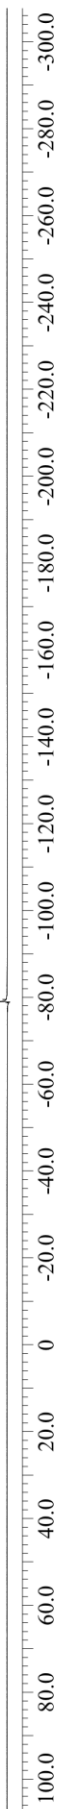

$^1\text{H}$  NMR of **13j** ( $\text{CDCl}_3$ , 400 MHz, 25  $^\circ\text{C}$ )

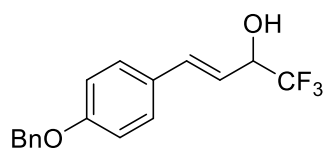

2.326  
2.339

4.562  
4.578  
4.593  
4.609  
4.625  
4.640

5.088

6.041  
6.058  
6.081  
6.098

6.770  
6.810  
6.950  
6.971

7.340  
7.353  
7.357  
7.375  
7.380  
7.399  
7.415  
7.431  
7.448

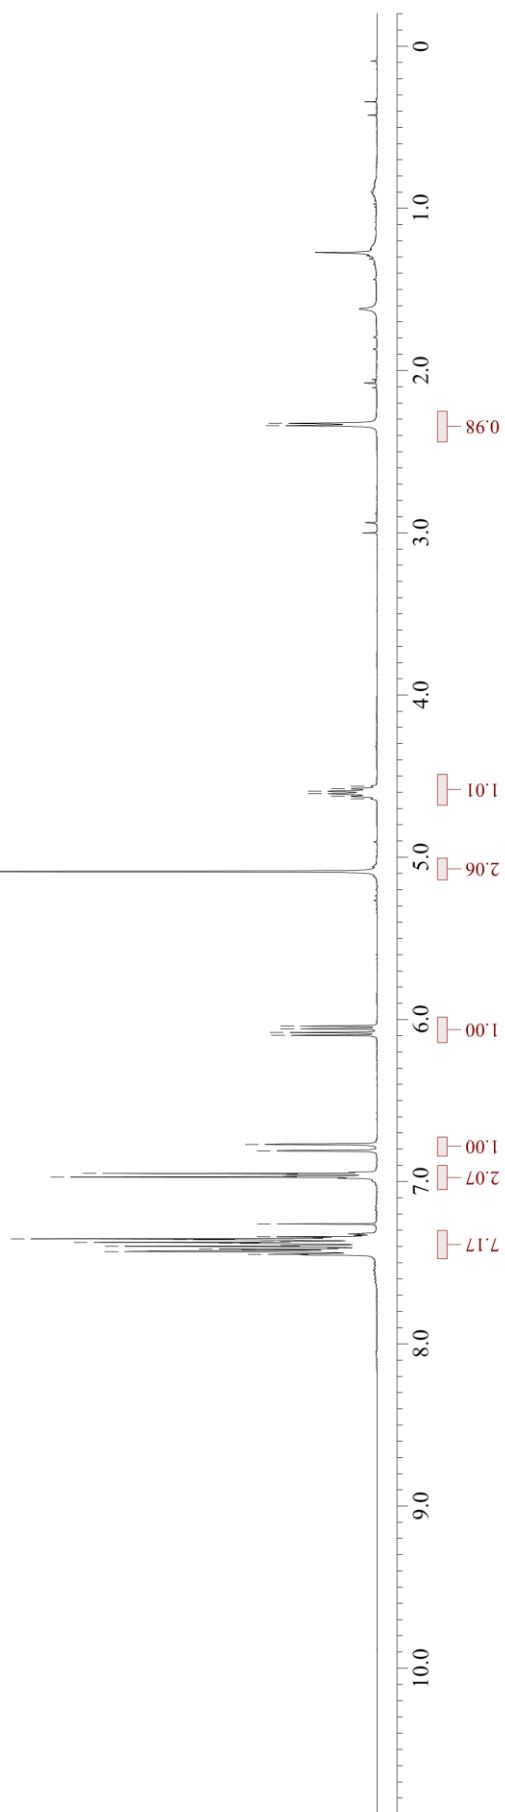

$^{13}\text{C}$  NMR of **13j** ( $\text{CDCl}_3$ , 100 MHz, 25 °C)

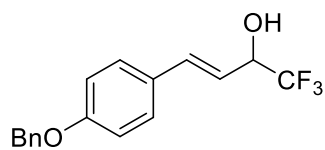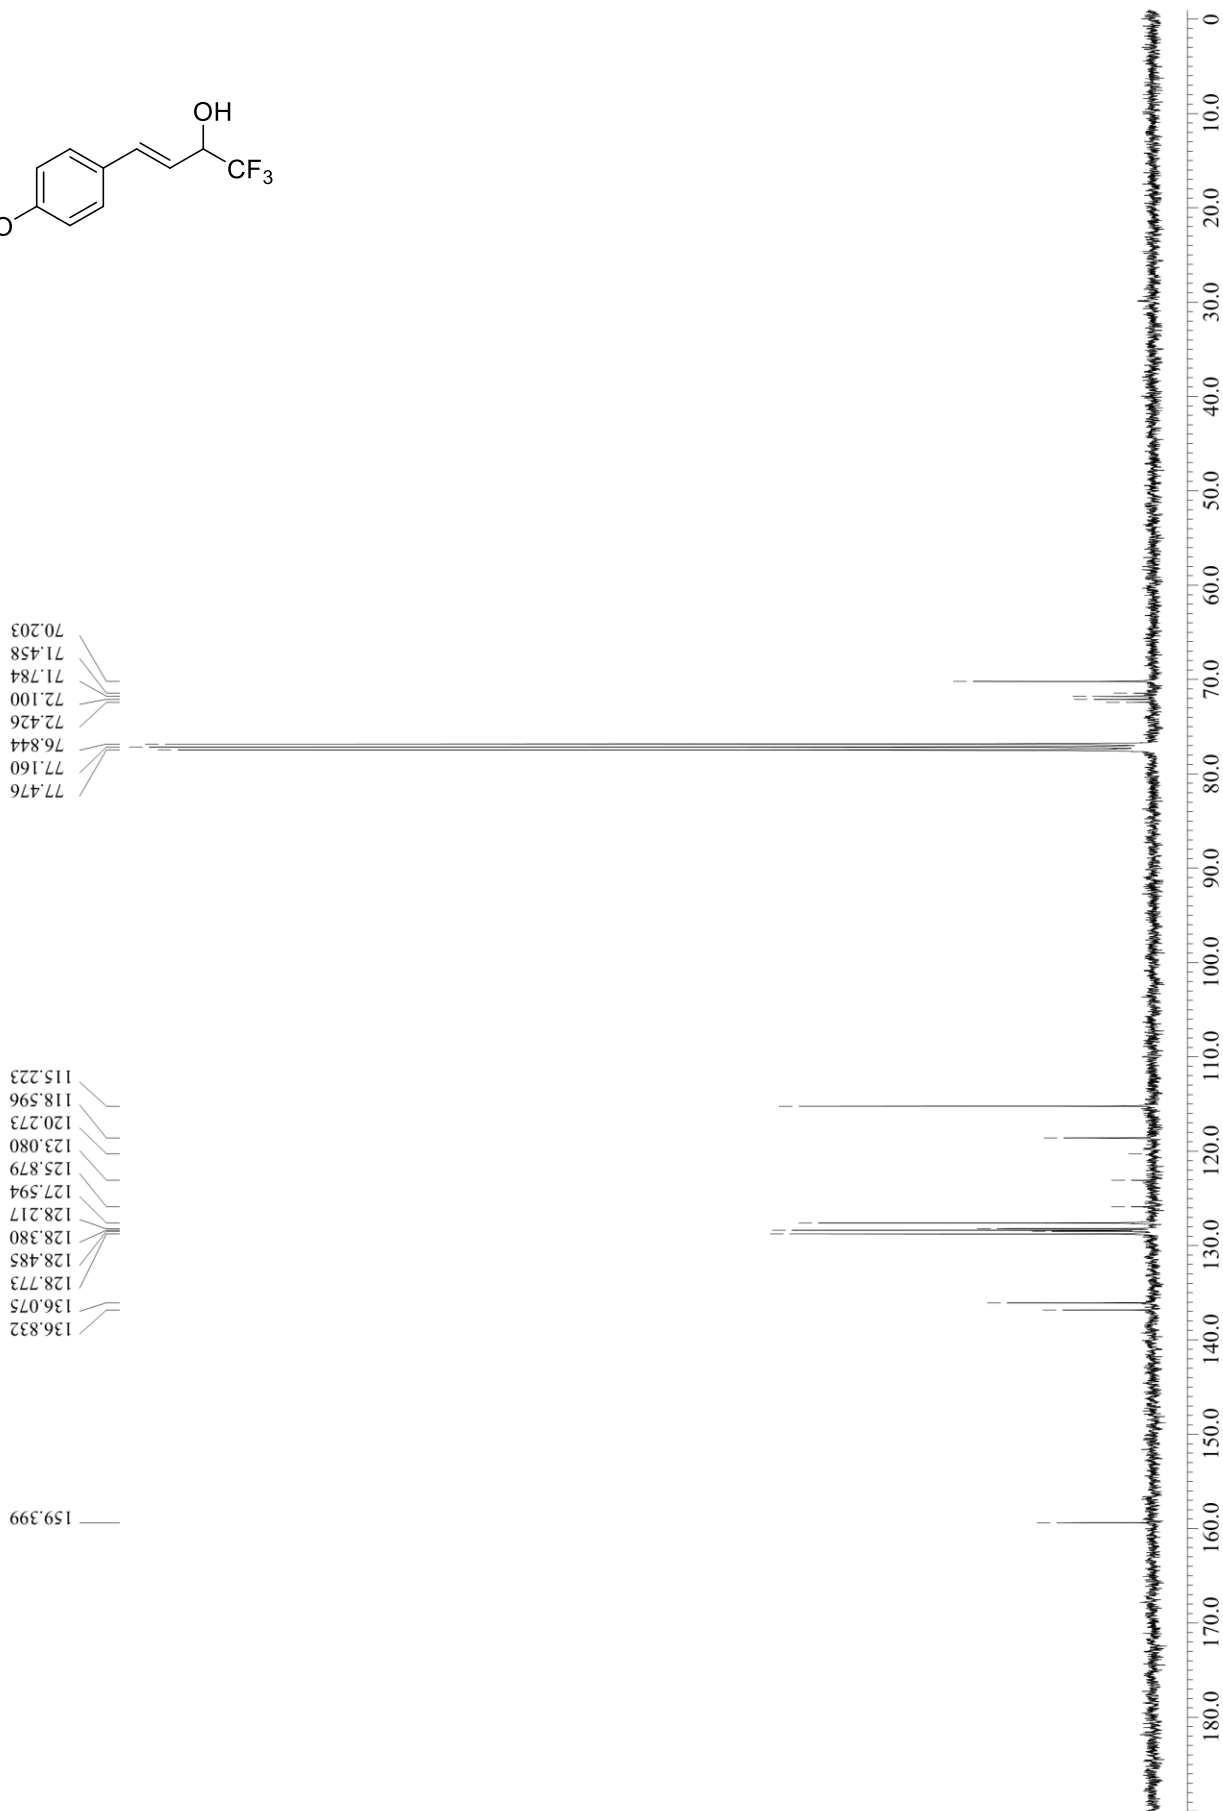

$^{19}\text{F}$  NMR of **13j** ( $\text{CDCl}_3$ , 375 MHz, 25 °C)

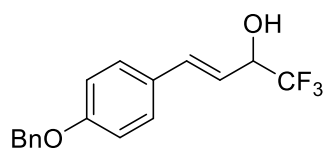

-78.981  
-78.997





$^1\text{H}$  NMR of **13k** ( $\text{CDCl}_3$ , 400 MHz, 25  $^\circ\text{C}$ )

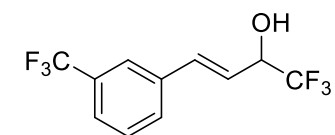

2.482  
2.470

4.689  
4.674

7.661  
7.605  
7.587  
7.554  
7.496  
7.477  
7.458  
7.261  
6.935  
6.895  
6.310  
6.295  
6.269  
6.255

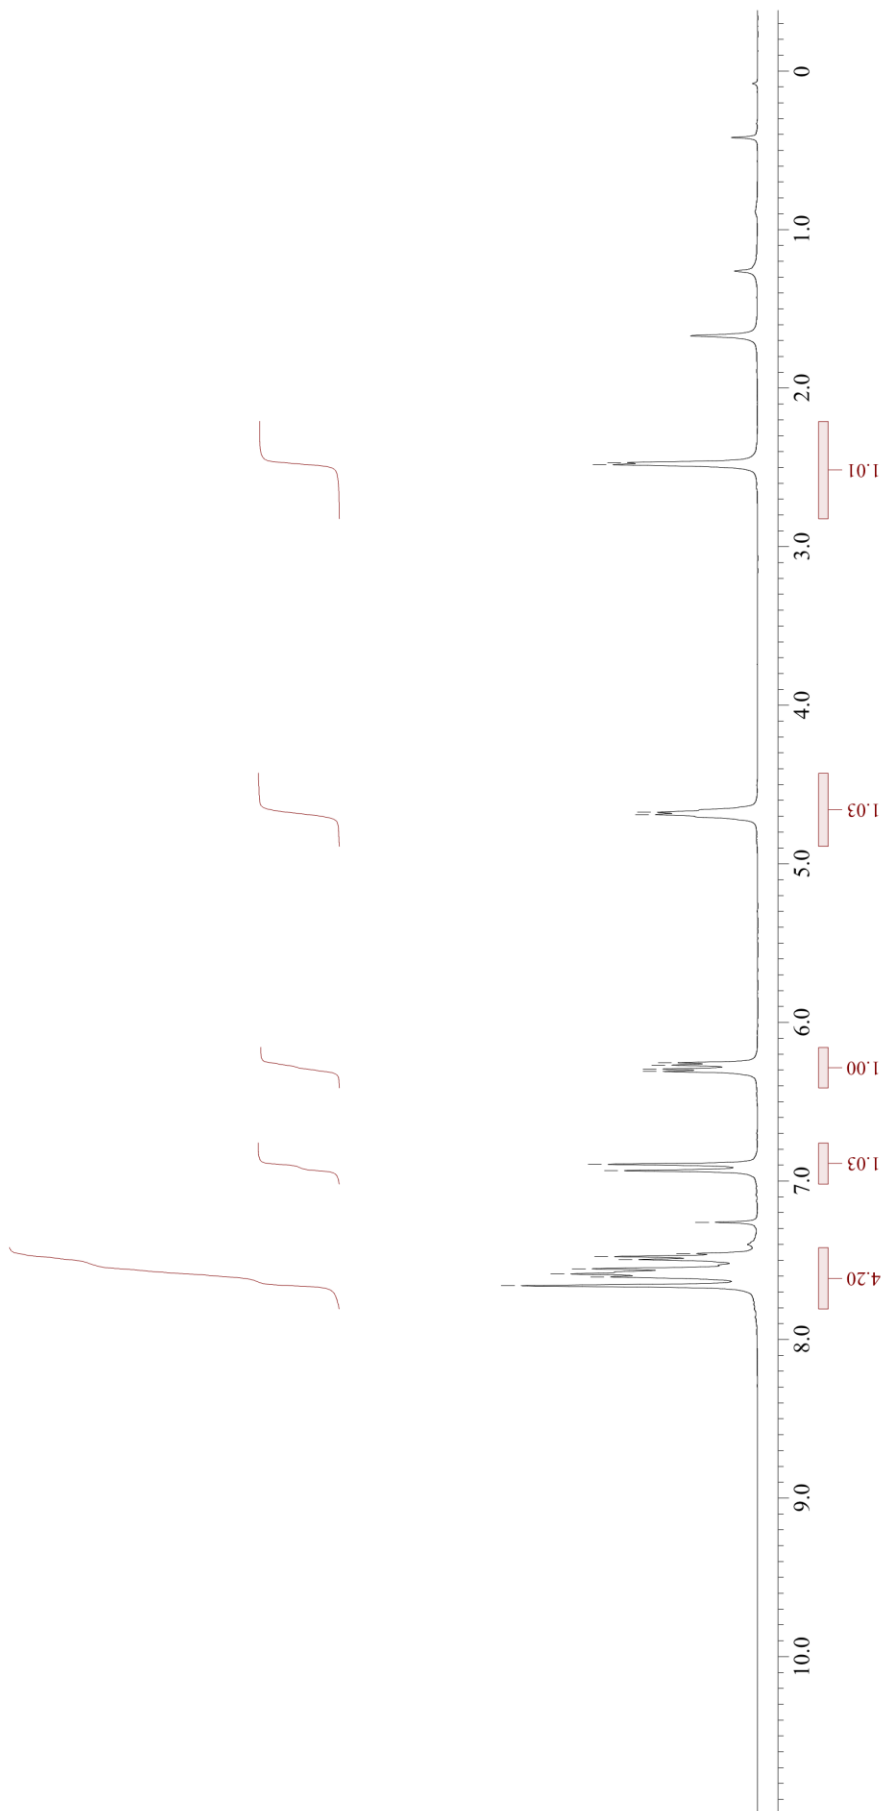

$^{13}\text{C}$  NMR of **13k** ( $\text{CDCl}_3$ , 150 MHz, 25 °C)

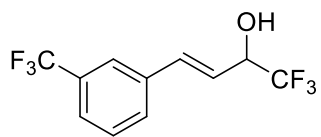

71.071  
71.285  
71.501  
71.715  
76.951  
77.160  
77.372

121.374  
121.478  
122.735  
123.179  
123.346  
123.675  
123.701  
123.726  
123.751  
124.985  
125.216  
125.353  
125.379  
125.403  
125.427  
126.789  
127.084  
127.084  
129.402  
130.133  
131.060  
131.274  
131.489  
131.704  
134.718  
136.296

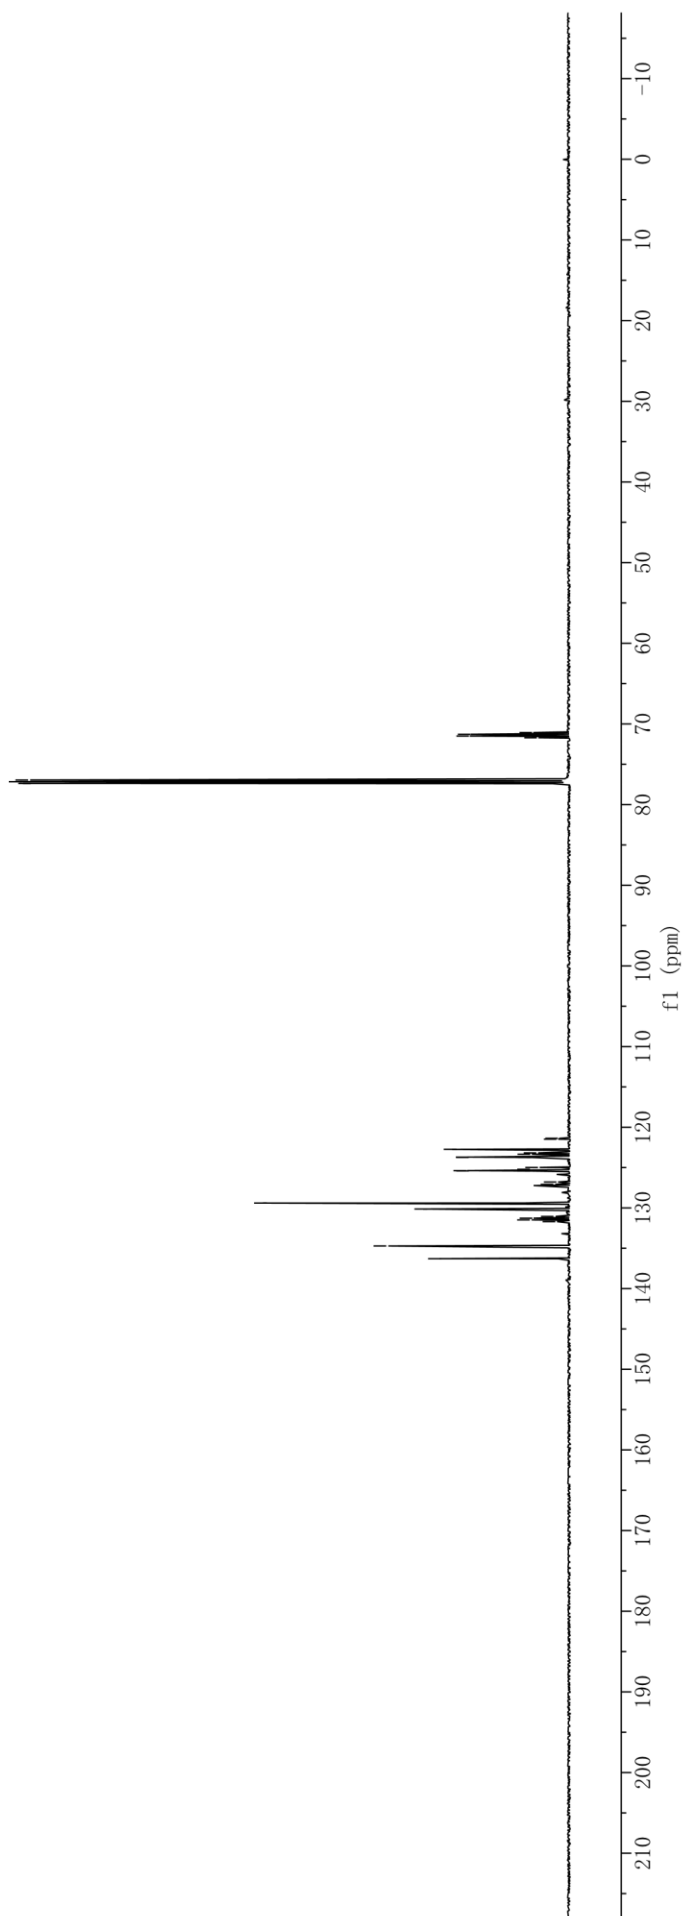

$^{19}\text{F}$  NMR of **13k** ( $\text{CDCl}_3$ , 375 MHz, 25 °C)

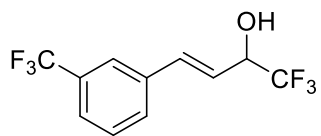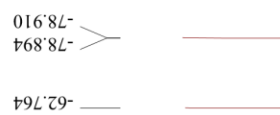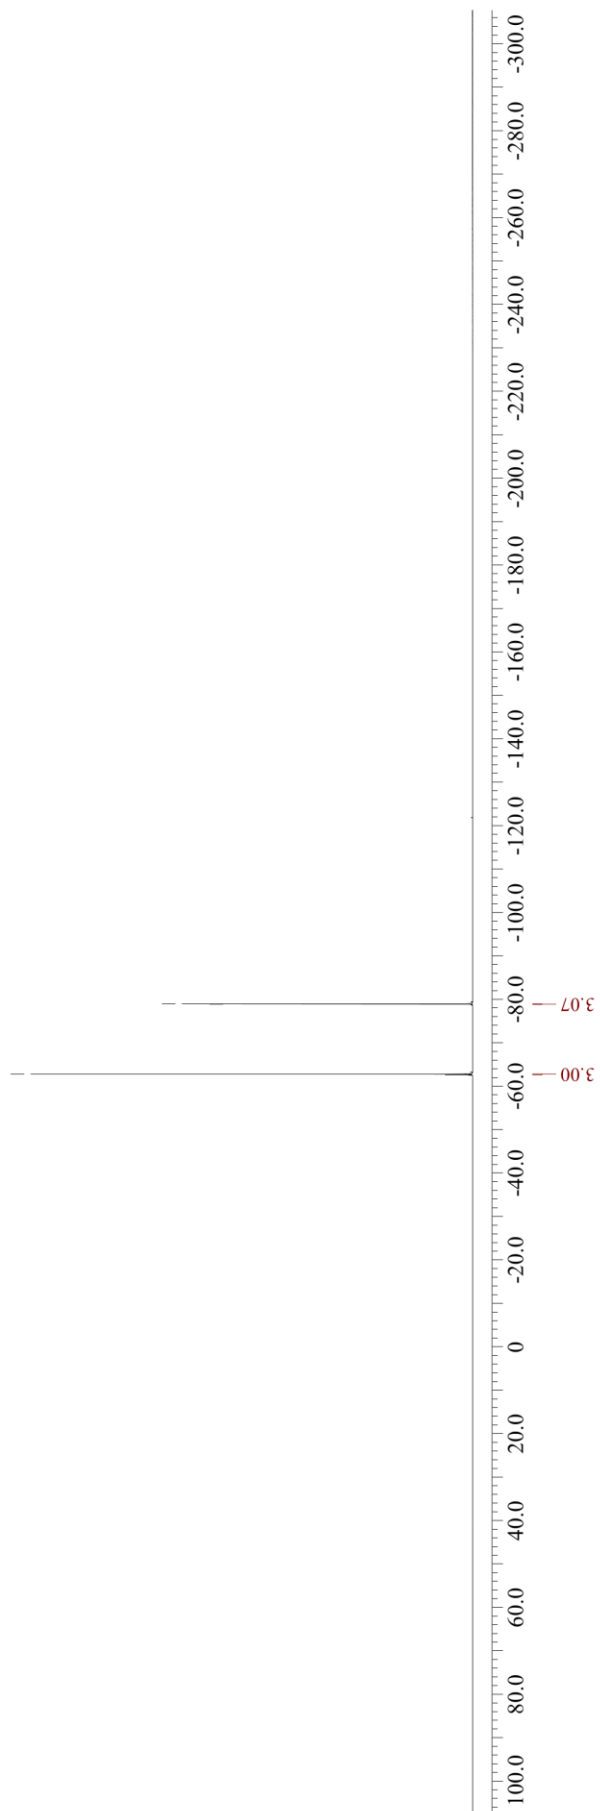

$^1\text{H}$  NMR of **131** ( $\text{CDCl}_3$ , 400 MHz, 25  $^\circ\text{C}$ )

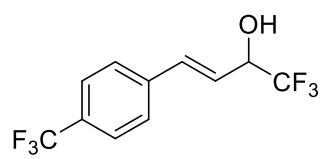

2.661

4.714  
4.699  
4.684  
4.668  
4.652

7.613  
7.592  
7.519  
7.500  
7.261  
6.931  
6.891  
6.326  
6.311  
6.286  
6.271

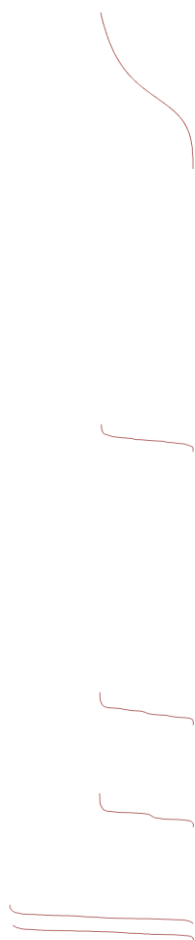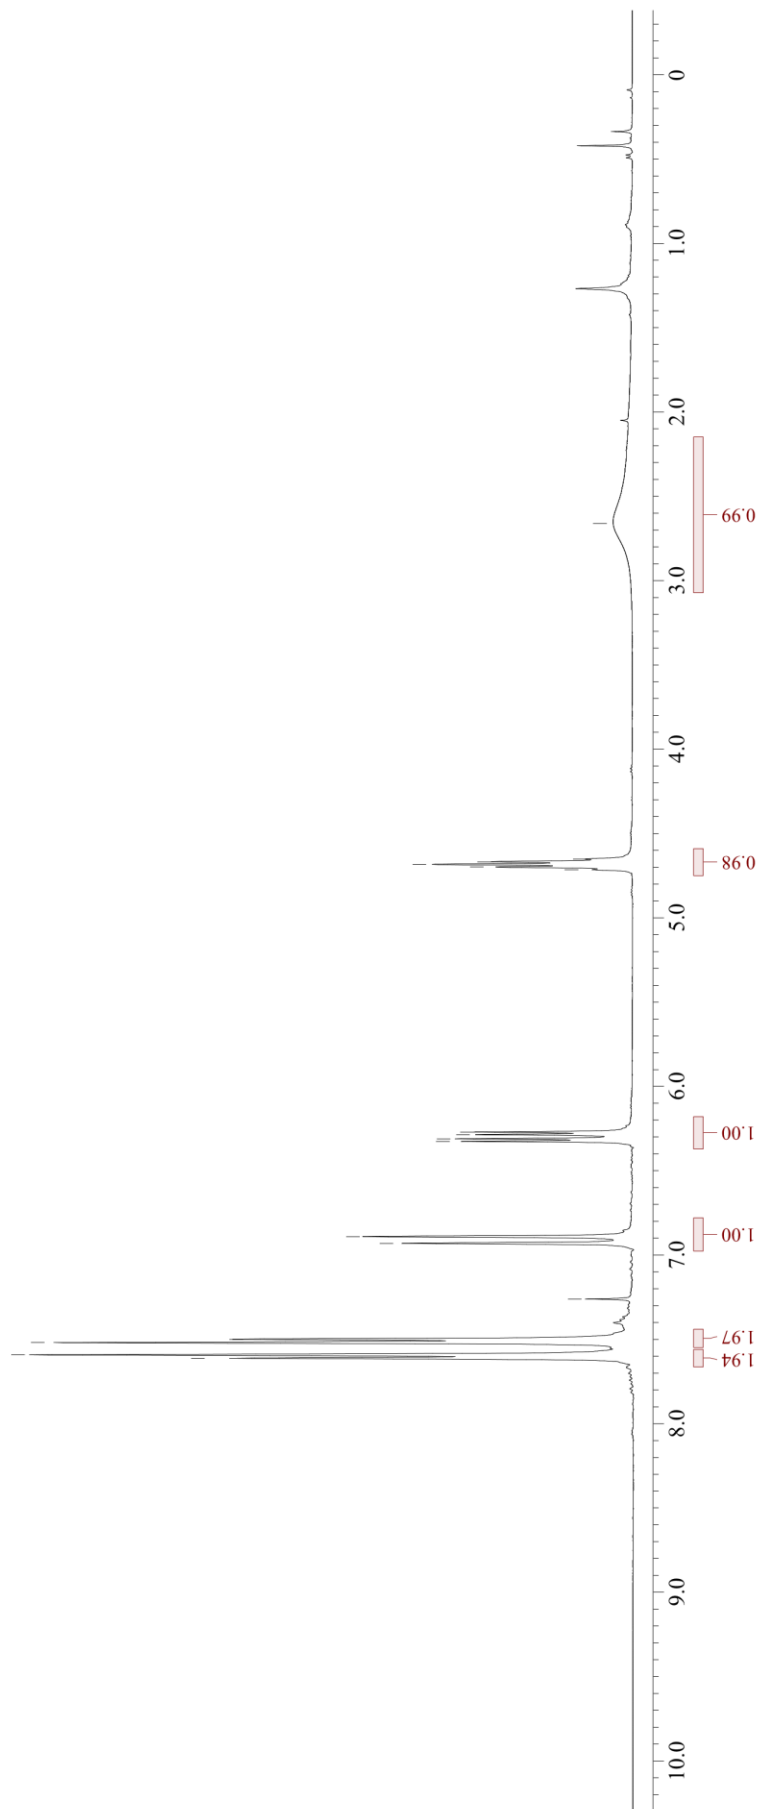

$^{13}\text{C}$  NMR of **131** ( $\text{CDCl}_3$ , 100 MHz, 25 °C)

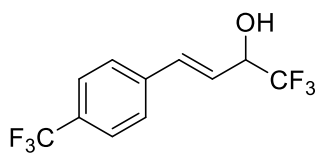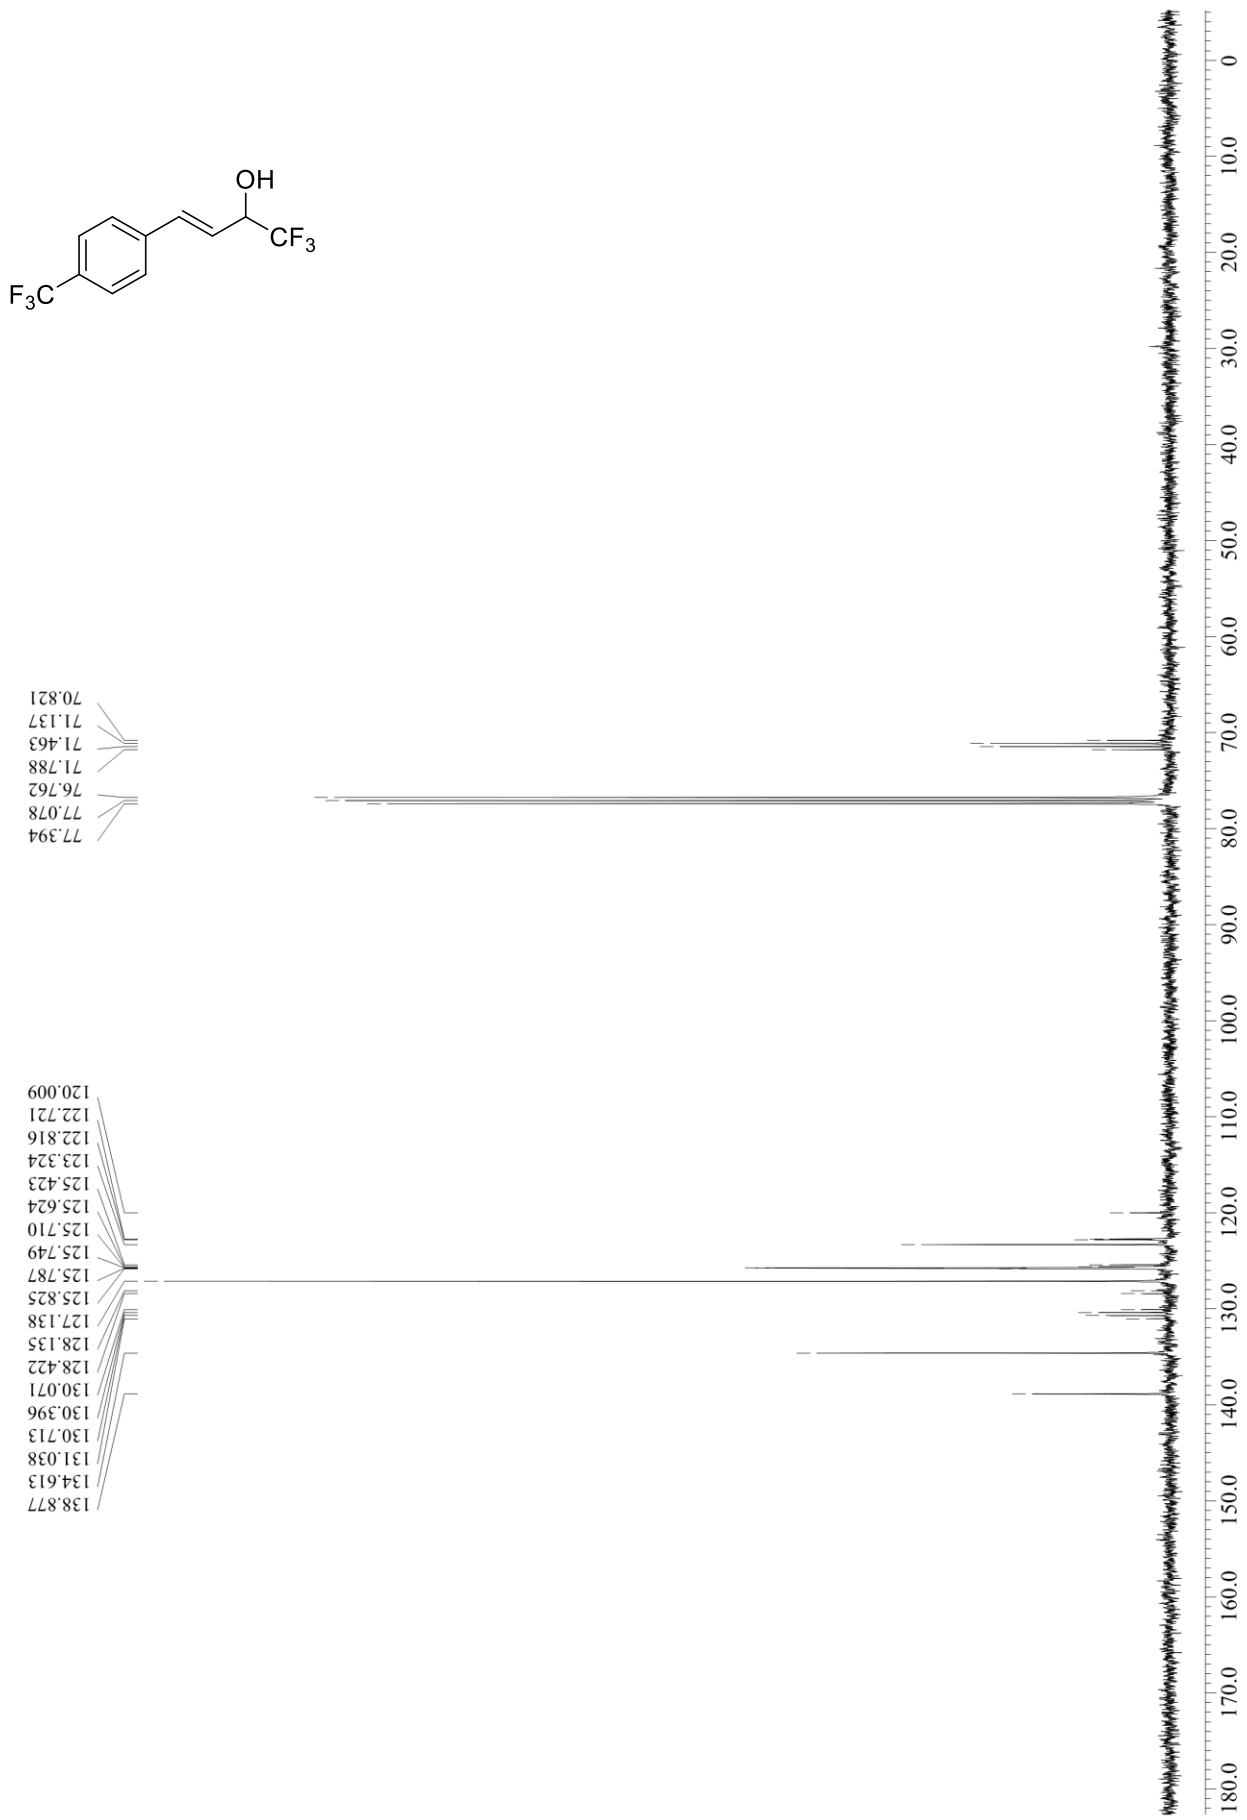

$^{19}\text{F}$  NMR of **131** ( $\text{CDCl}_3$ , 375 MHz, 25 °C)

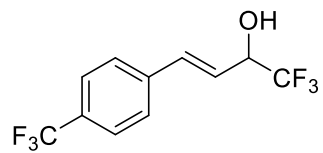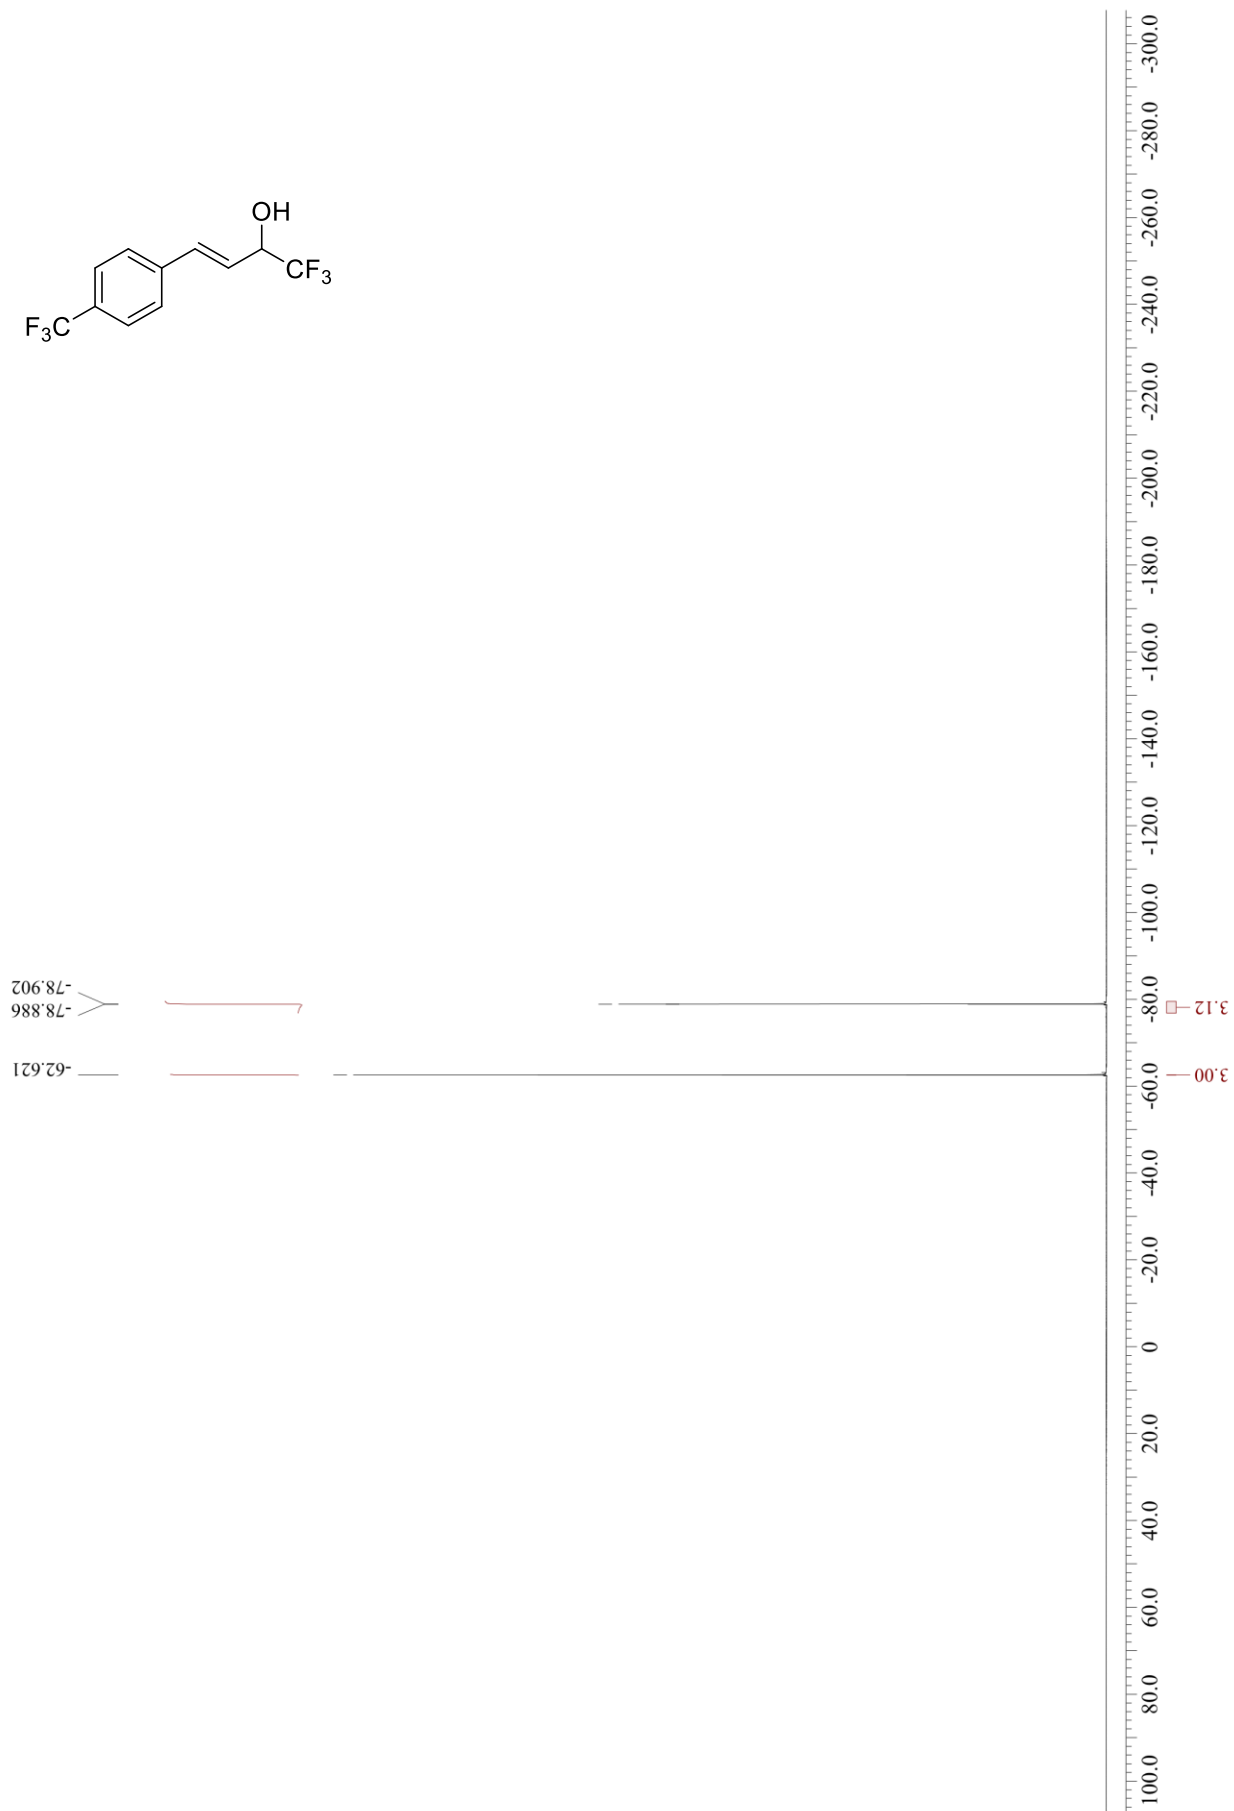

$^1\text{H}$  NMR of **14a** ( $\text{CDCl}_3$ , 400 MHz, 25  $^\circ\text{C}$ )

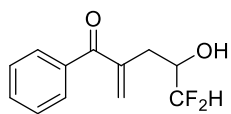

2.627  
2.650  
2.662  
2.685  
2.799  
2.806  
2.834  
2.841  
3.831  
3.908  
3.934  
3.947  
3.960  
3.985

5.575  
5.584  
5.714  
5.724  
5.832  
5.854  
5.863  
6.106

7.261  
7.433  
7.452  
7.471  
7.558  
7.576  
7.594  
7.763  
7.781

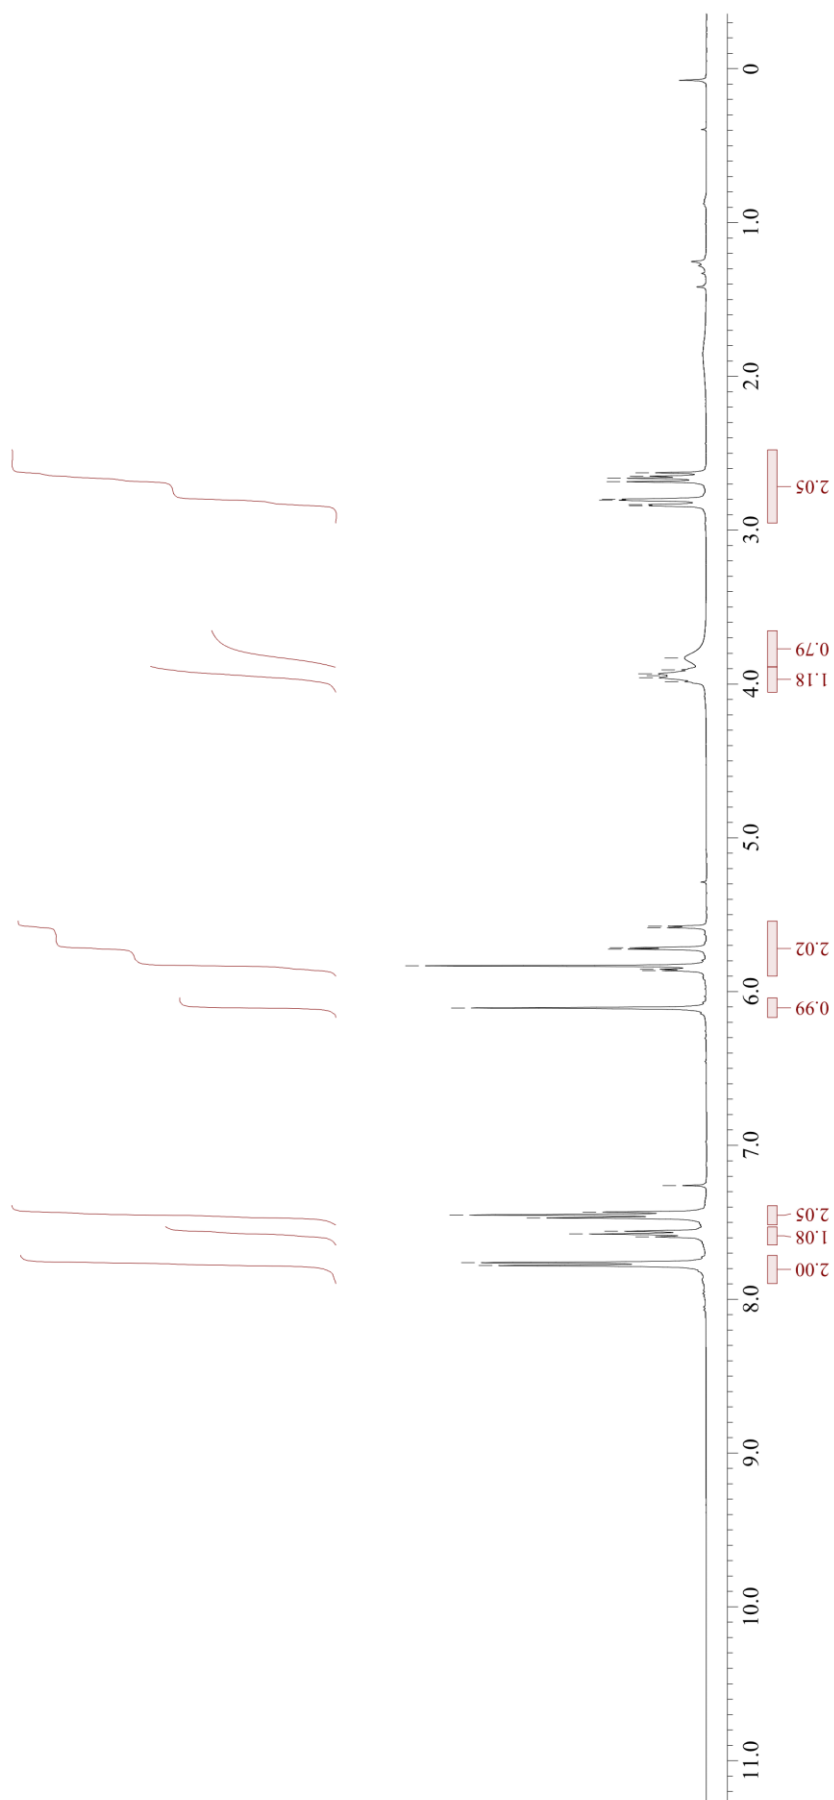

$^{13}\text{C}$  NMR of **14a** ( $\text{CDCl}_3$ , 100 MHz, 25 °C)

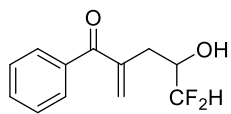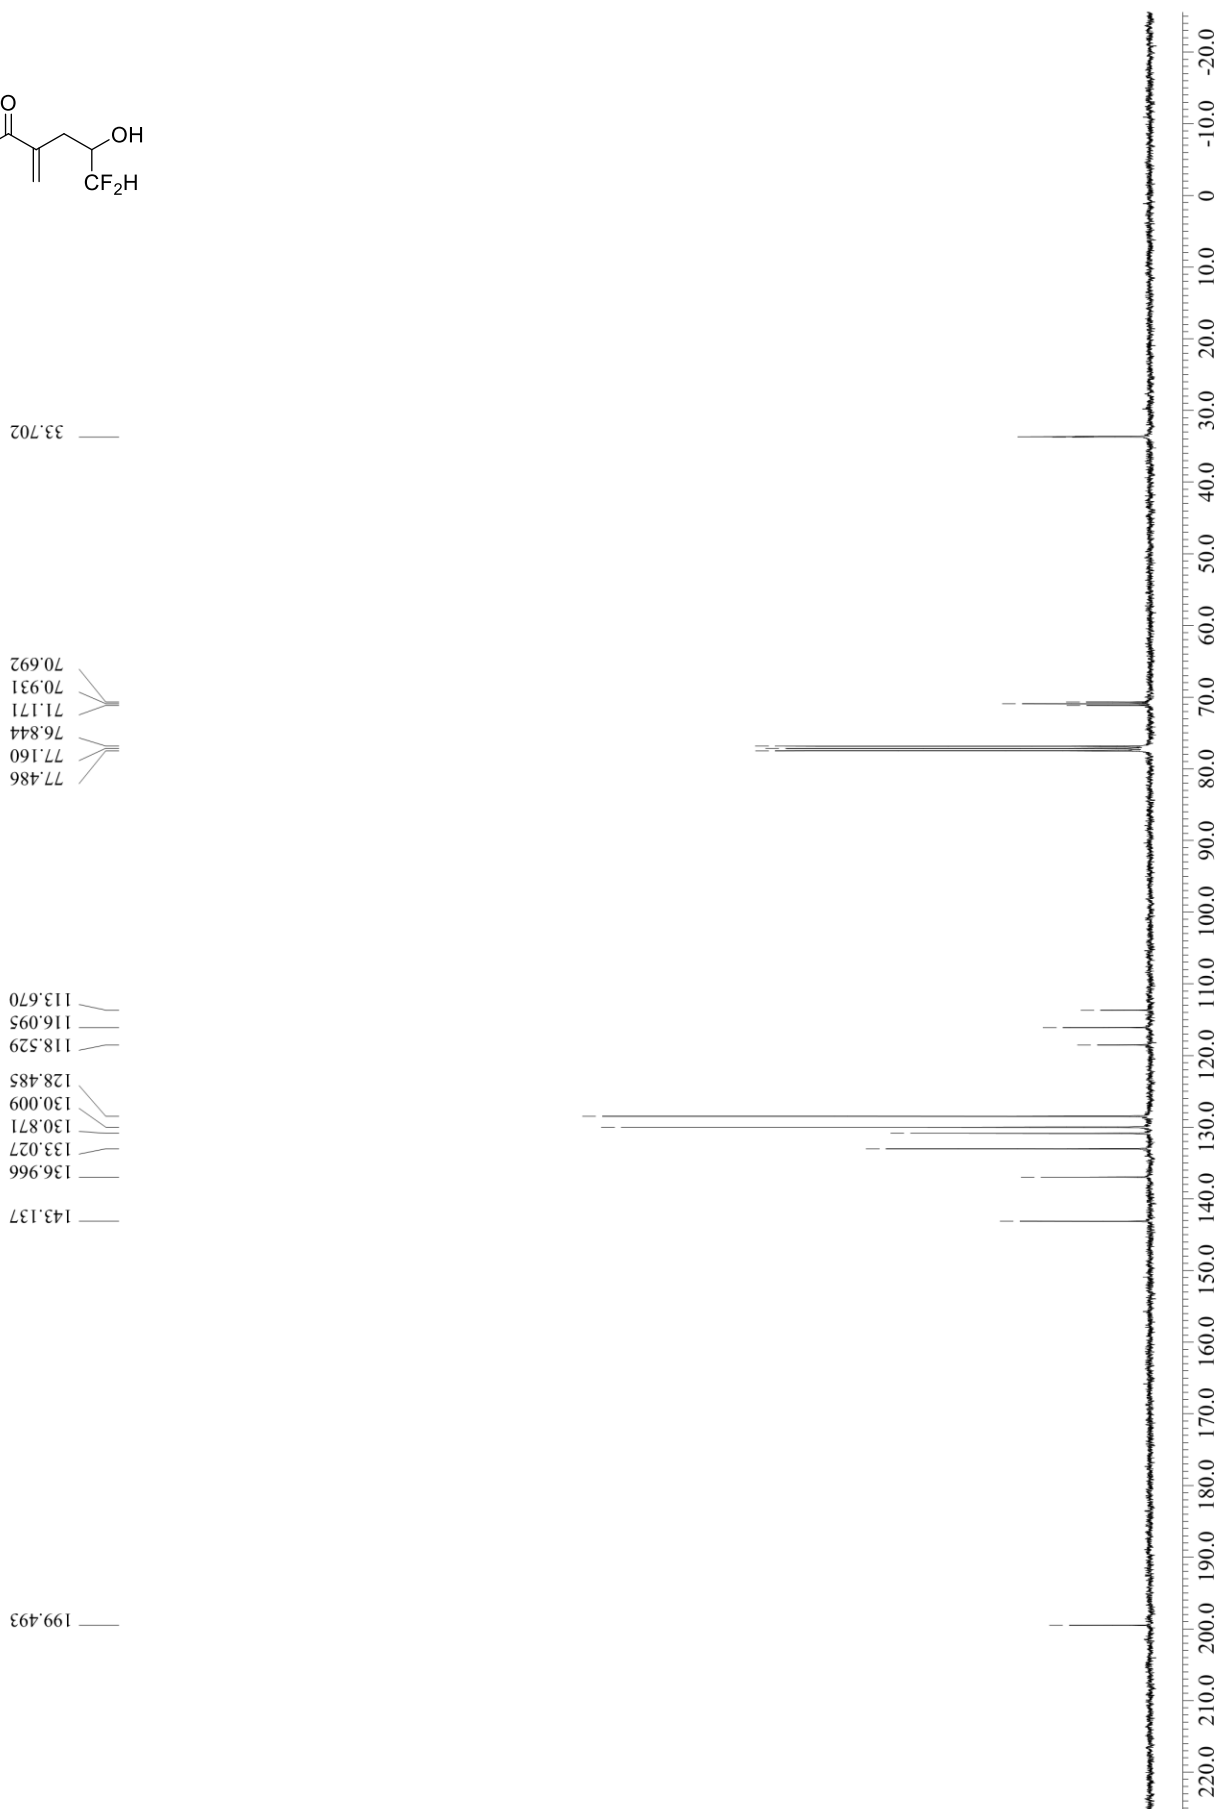



$^{19}\text{F}$  NMR of **14a** ( $\text{CDCl}_3$ , 375 MHz, 25 °C)

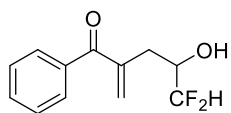

-131.183  
-131.151  
-131.033  
-130.423  
-130.391  
-130.272  
-130.248  
-129.361  
-129.337  
-129.218  
-129.187  
-128.577  
-128.458

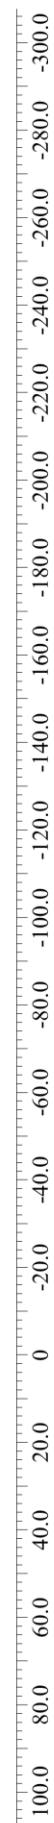

<sup>1</sup>H NMR of **14b** (CDCl<sub>3</sub>, 400 MHz, 25 °C)

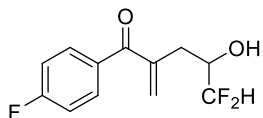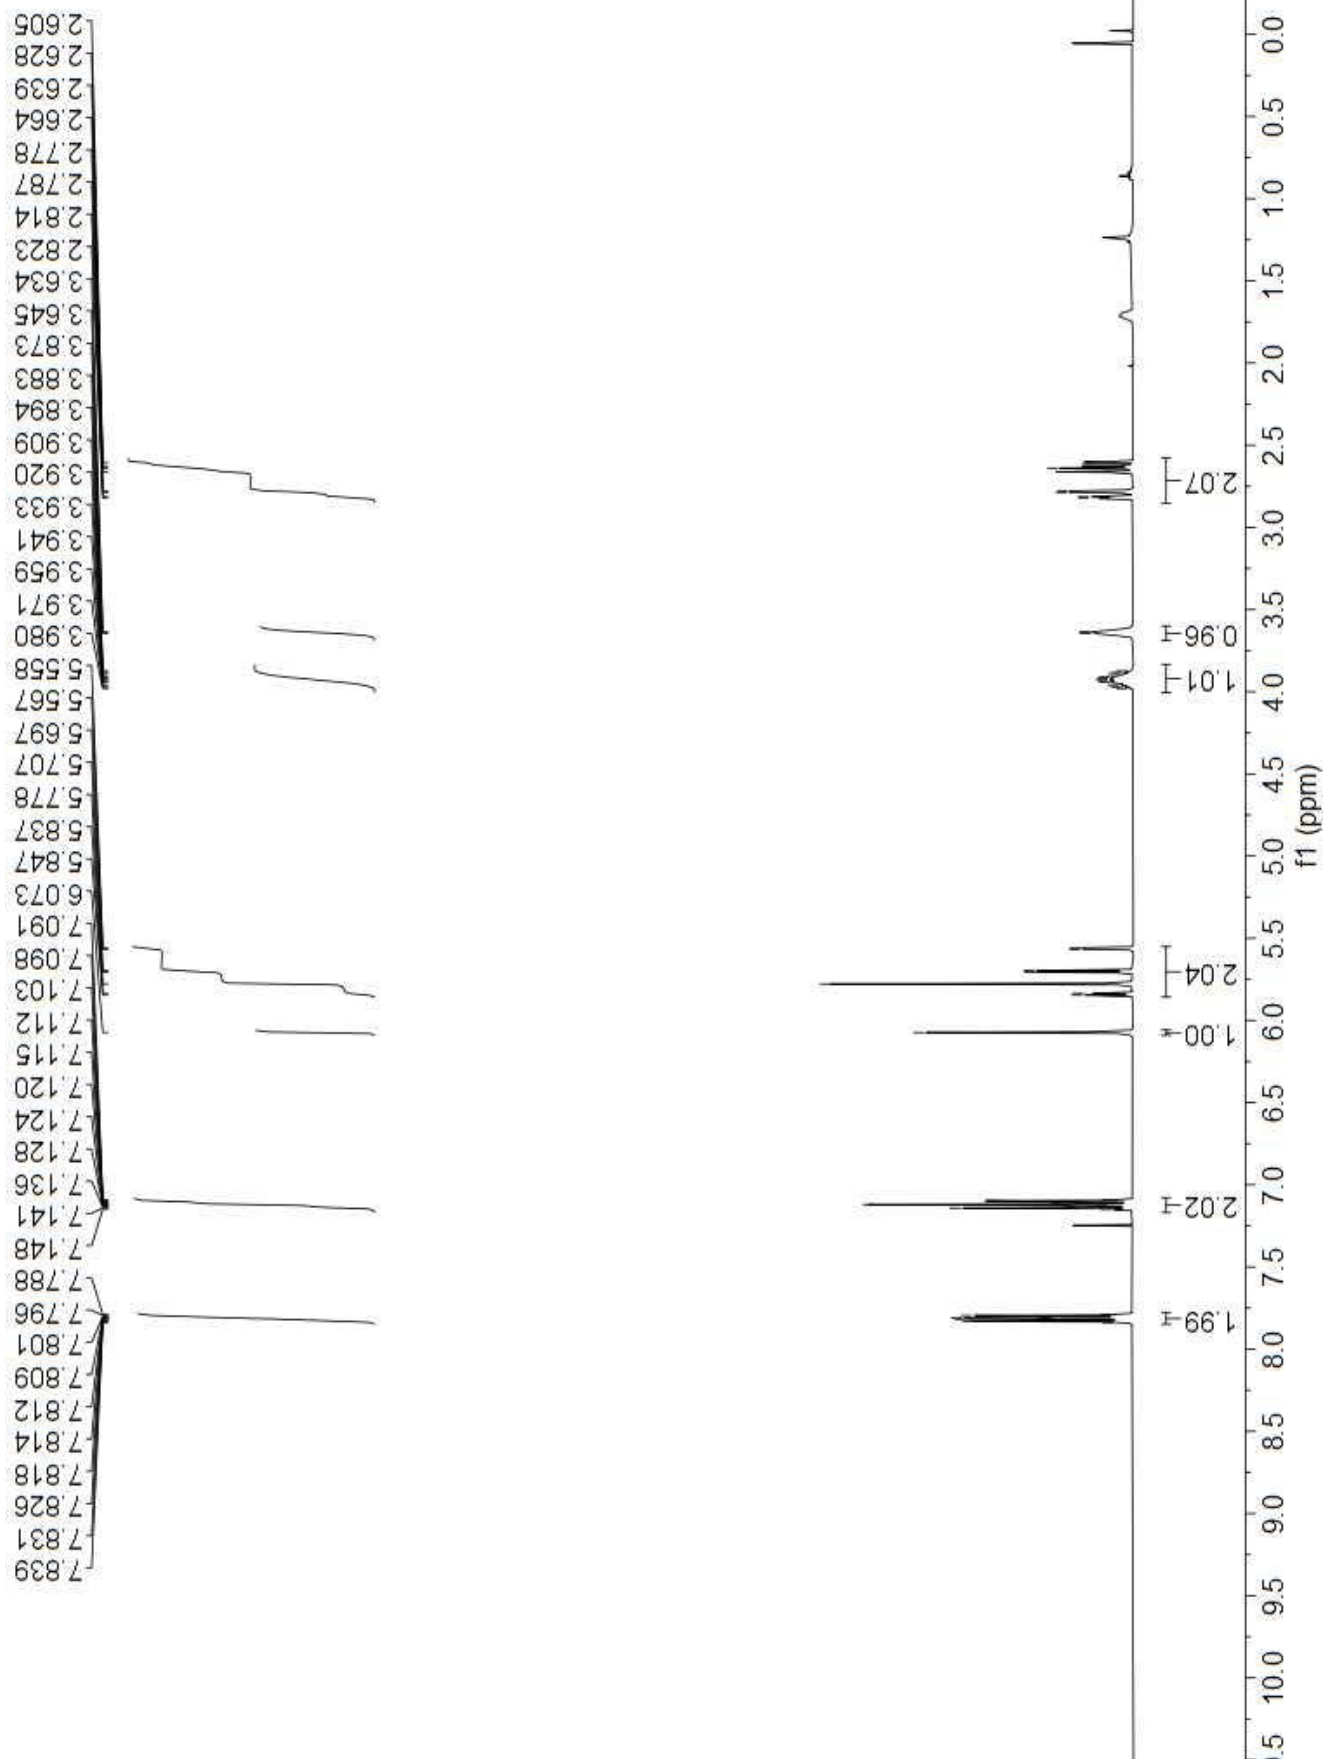

$^{13}\text{C}$  NMR of **14b** ( $\text{CDCl}_3$ , 100 MHz, 25 °C)

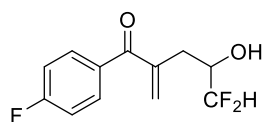

33.767  
33.728  
33.686

77.478  
77.161  
76.842  
71.168  
70.928  
70.692

143.139  
133.183  
133.150  
132.723  
132.631  
130.222  
118.500  
116.067  
115.836  
115.616  
113.637

167.109  
164.573

197.841

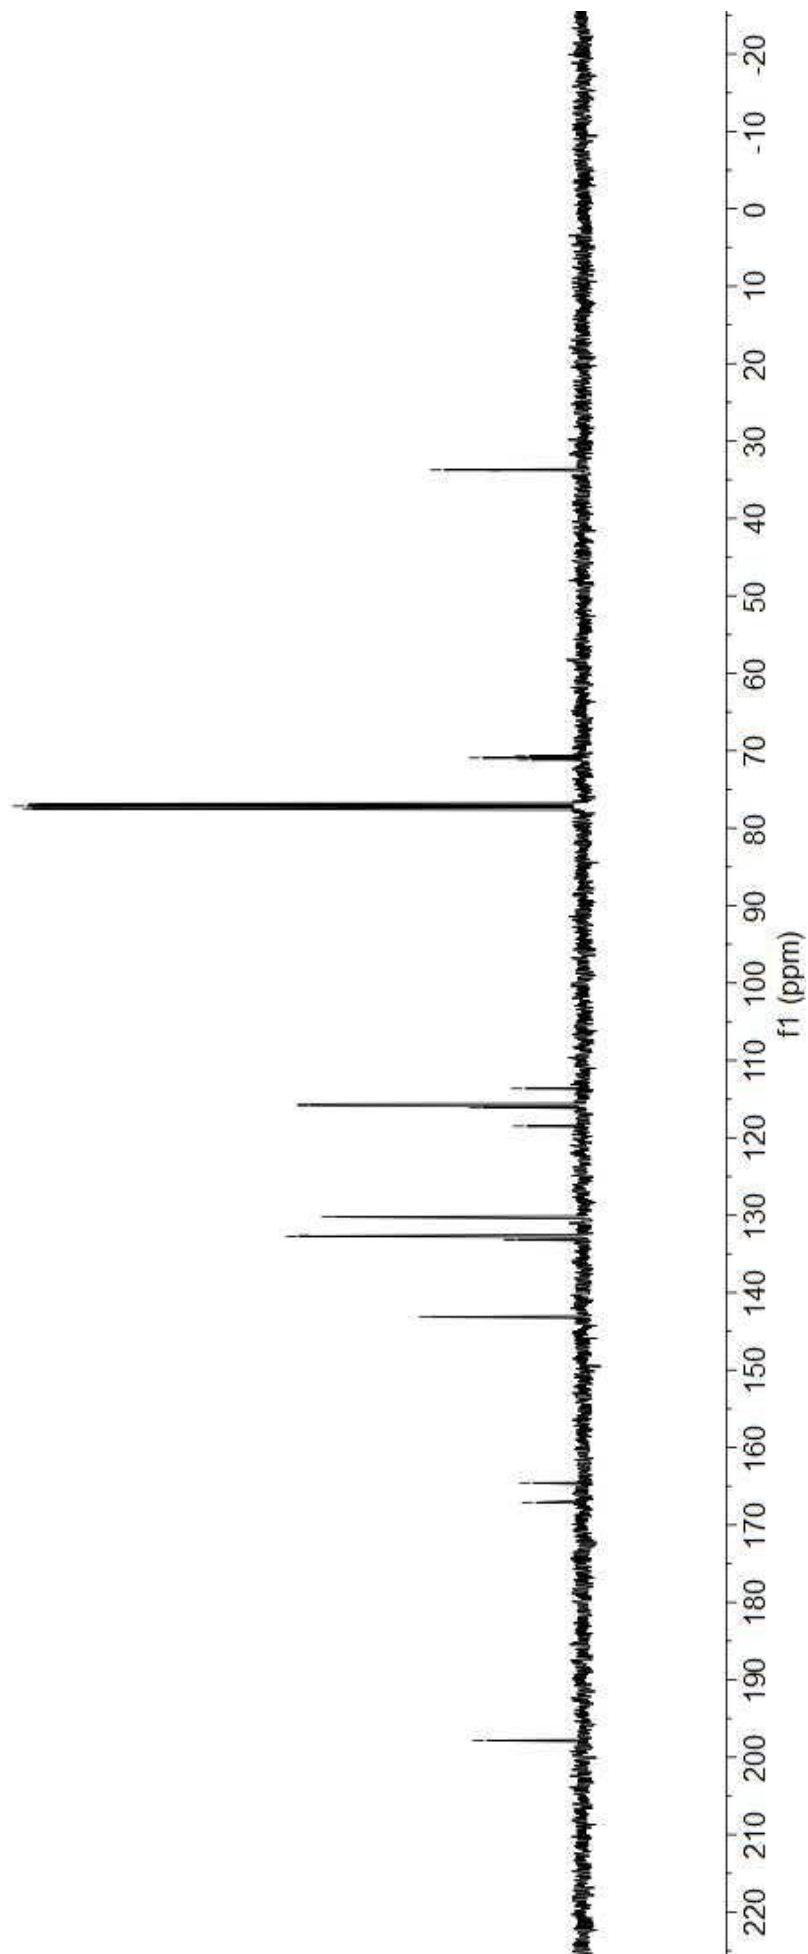

$^{19}\text{F}$  NMR of **14b** ( $\text{CDCl}_3$ , 375 MHz, 25  $^\circ\text{C}$ )

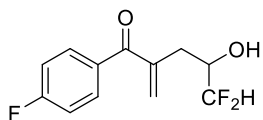

131.292  
131.260  
131.143  
131.111  
130.531  
130.499  
130.382  
130.350  
129.367  
129.339  
129.219  
129.191  
128.606  
128.578  
128.458  
128.430  
104.972  
104.958  
104.947  
104.934  
104.920  
104.909  
104.895

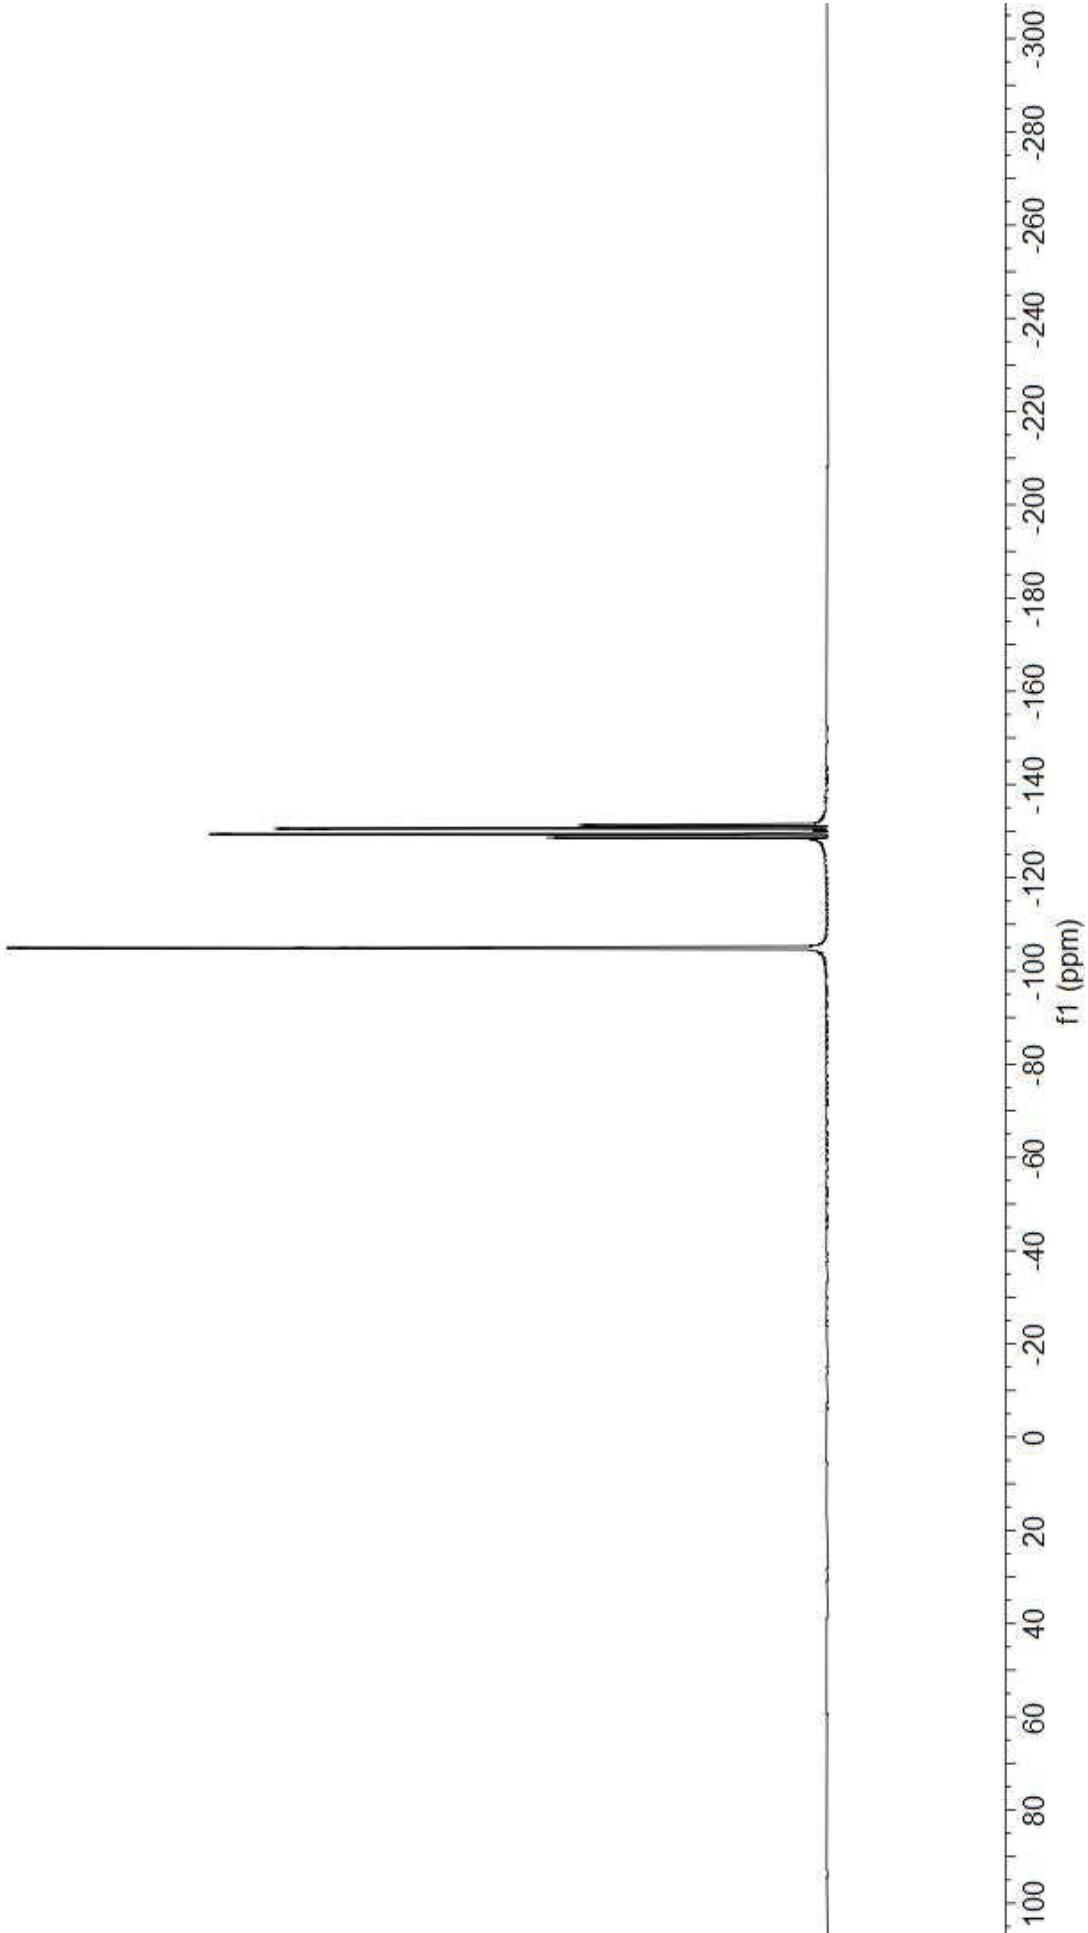

<sup>1</sup>H NMR of **14c** (CDCl<sub>3</sub>, 400 MHz, 25 °C)

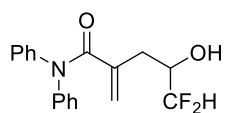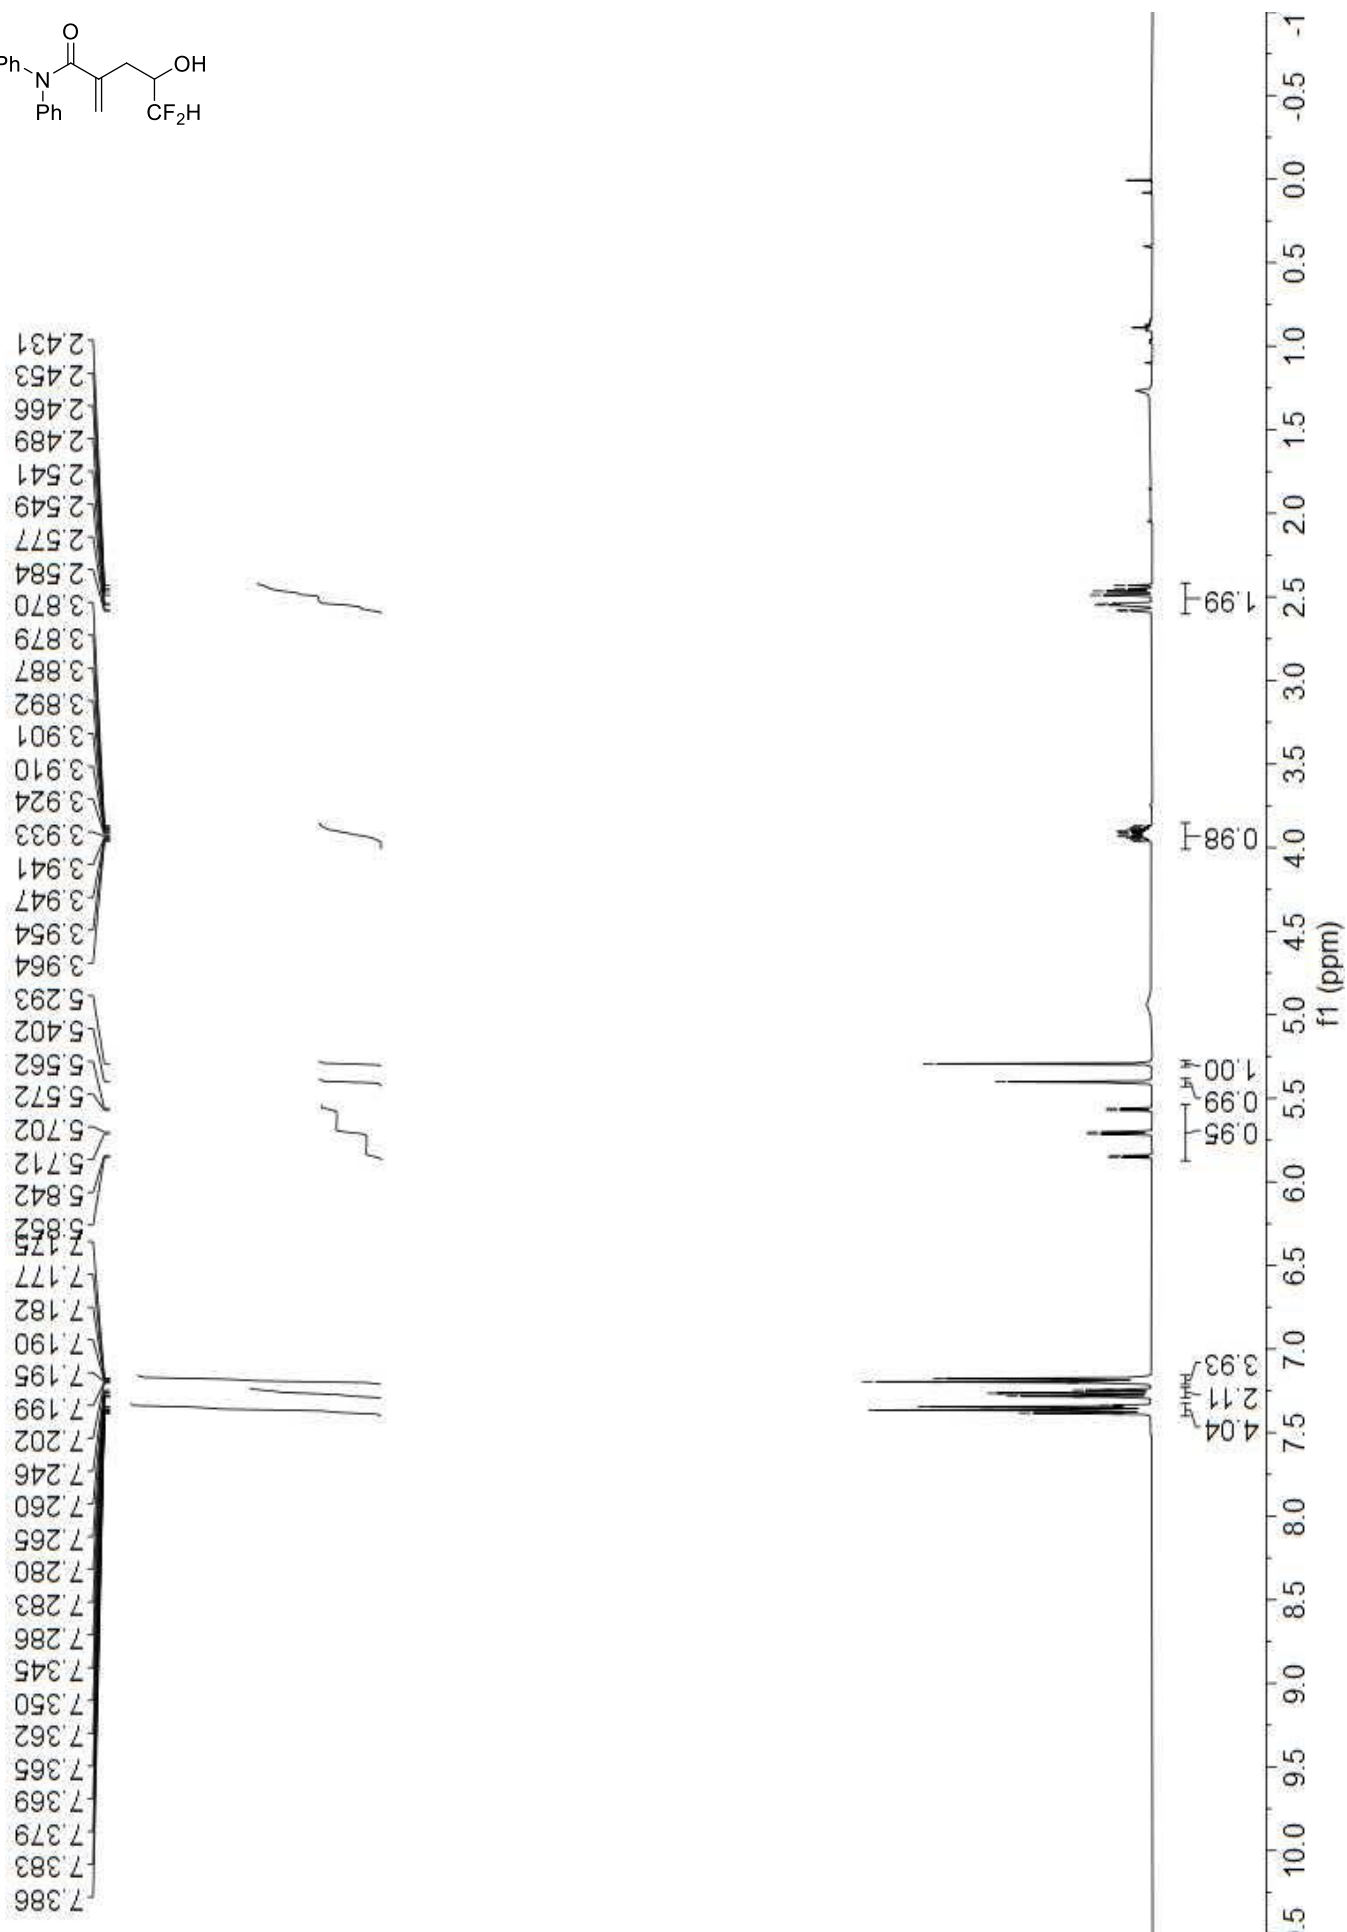

$^{13}\text{C}$  NMR of **14c** ( $\text{CDCl}_3$ , 100 MHz, 25 °C)

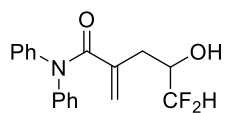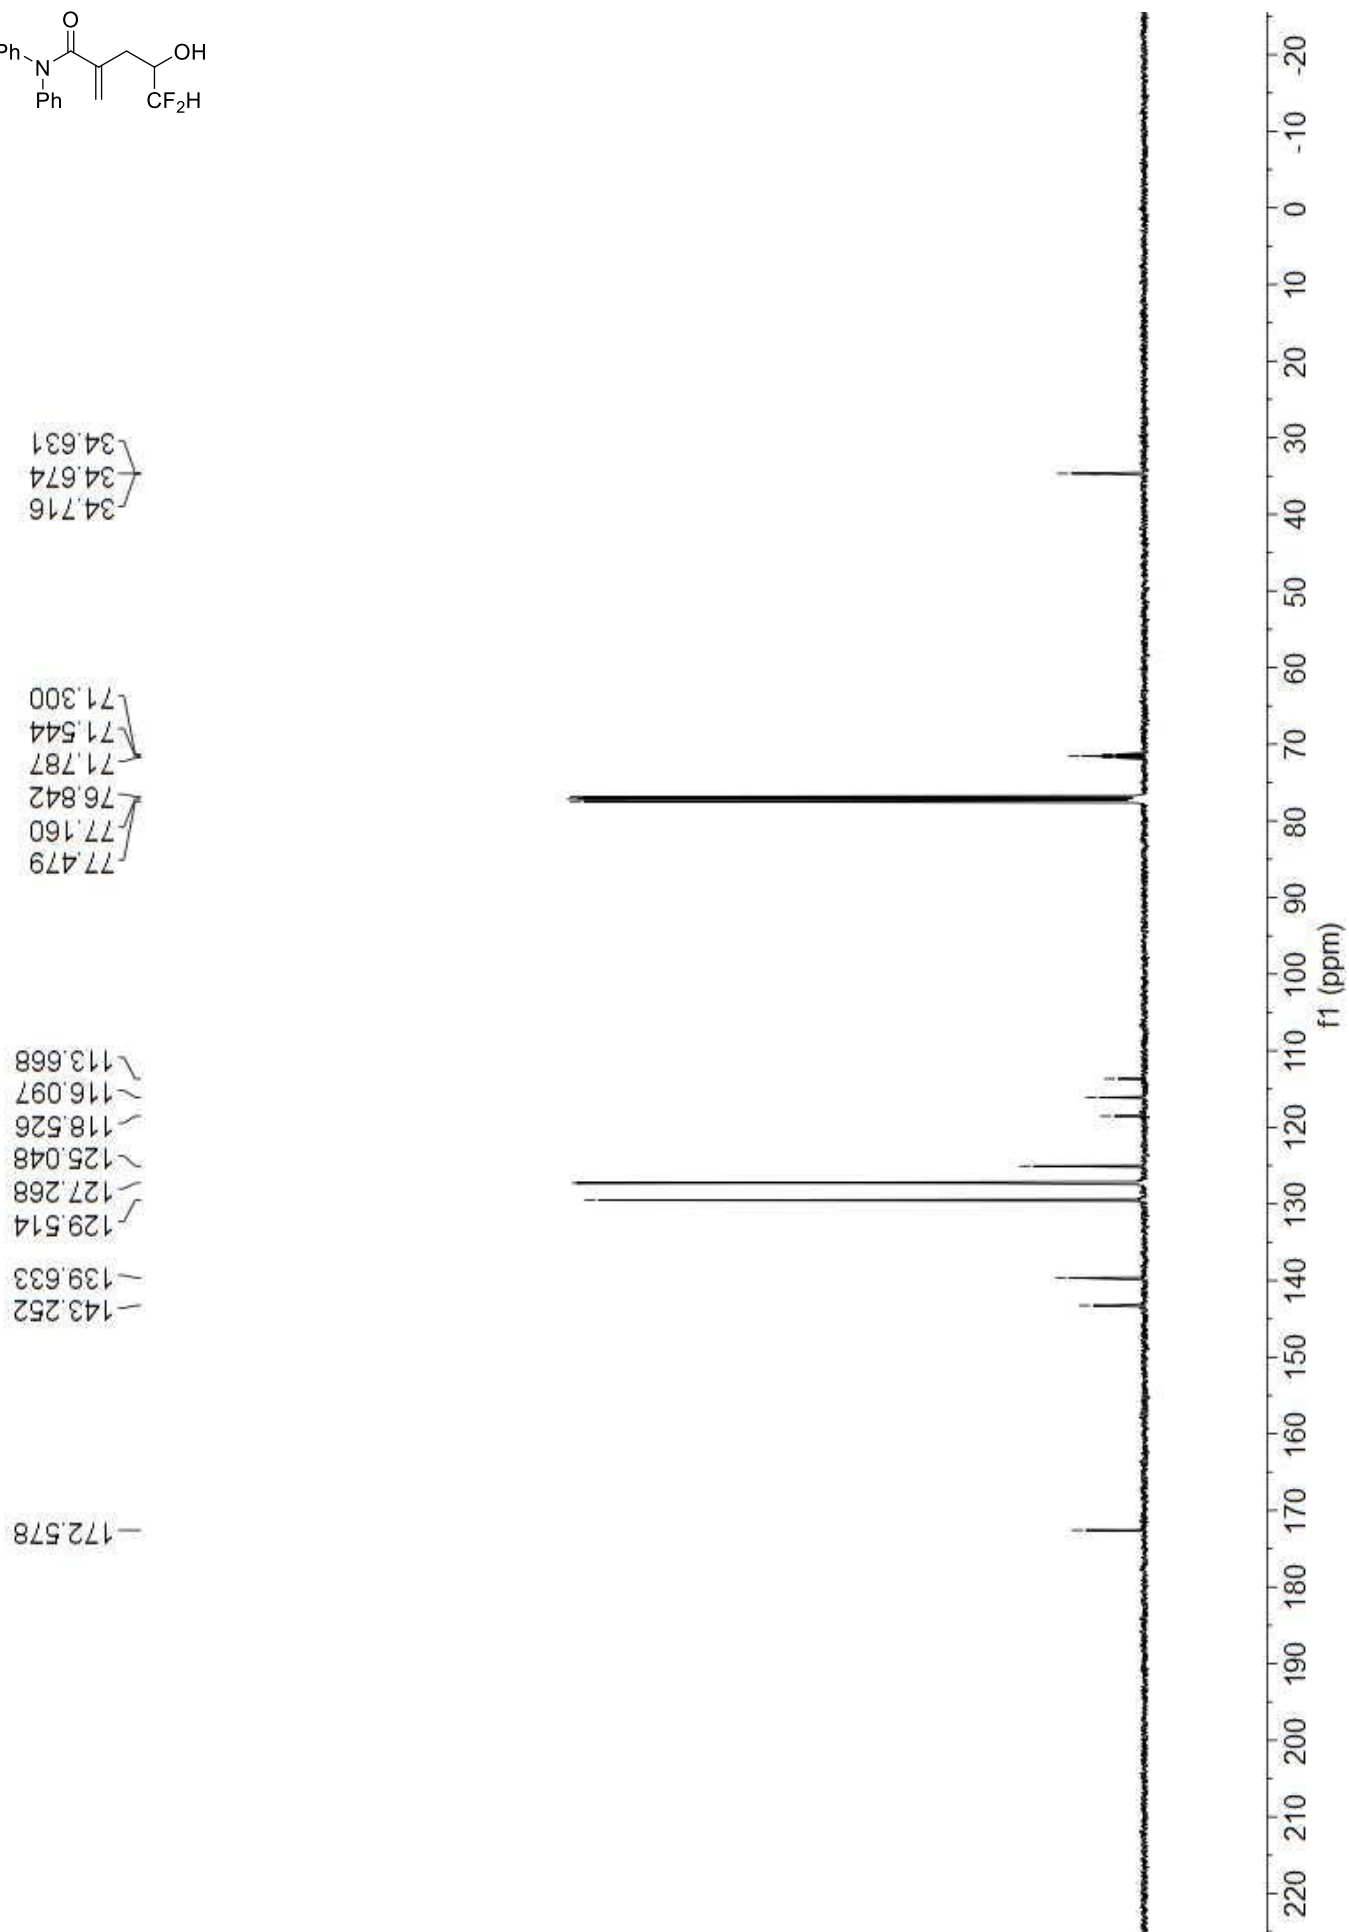

$^{19}\text{F}$  NMR of **14c** ( $\text{CDCl}_3$ , 375 MHz, 25  $^\circ\text{C}$ )

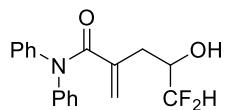

131.924  
131.885  
131.770  
131.738  
131.160  
131.129  
131.014  
130.978  
128.736  
128.712  
128.126  
128.102  
127.980  
127.936

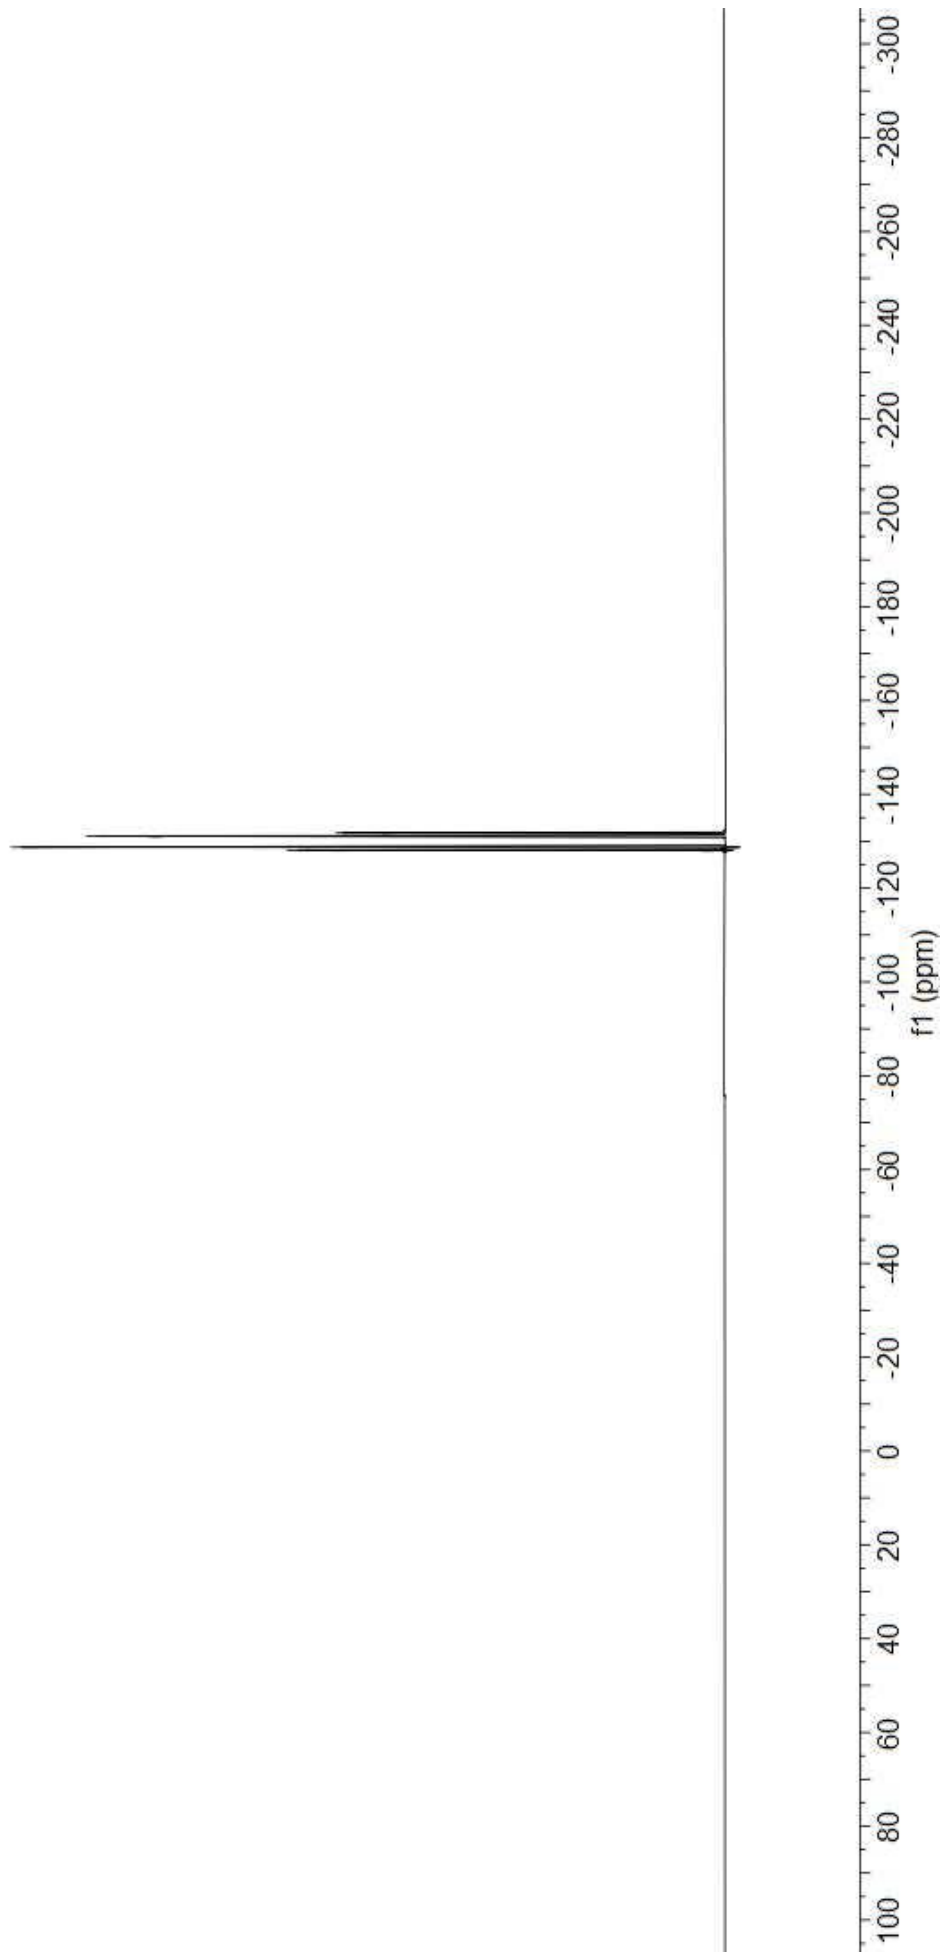

<sup>1</sup>H NMR of **14d** (CDCl<sub>3</sub>, 400 MHz, 25 °C)

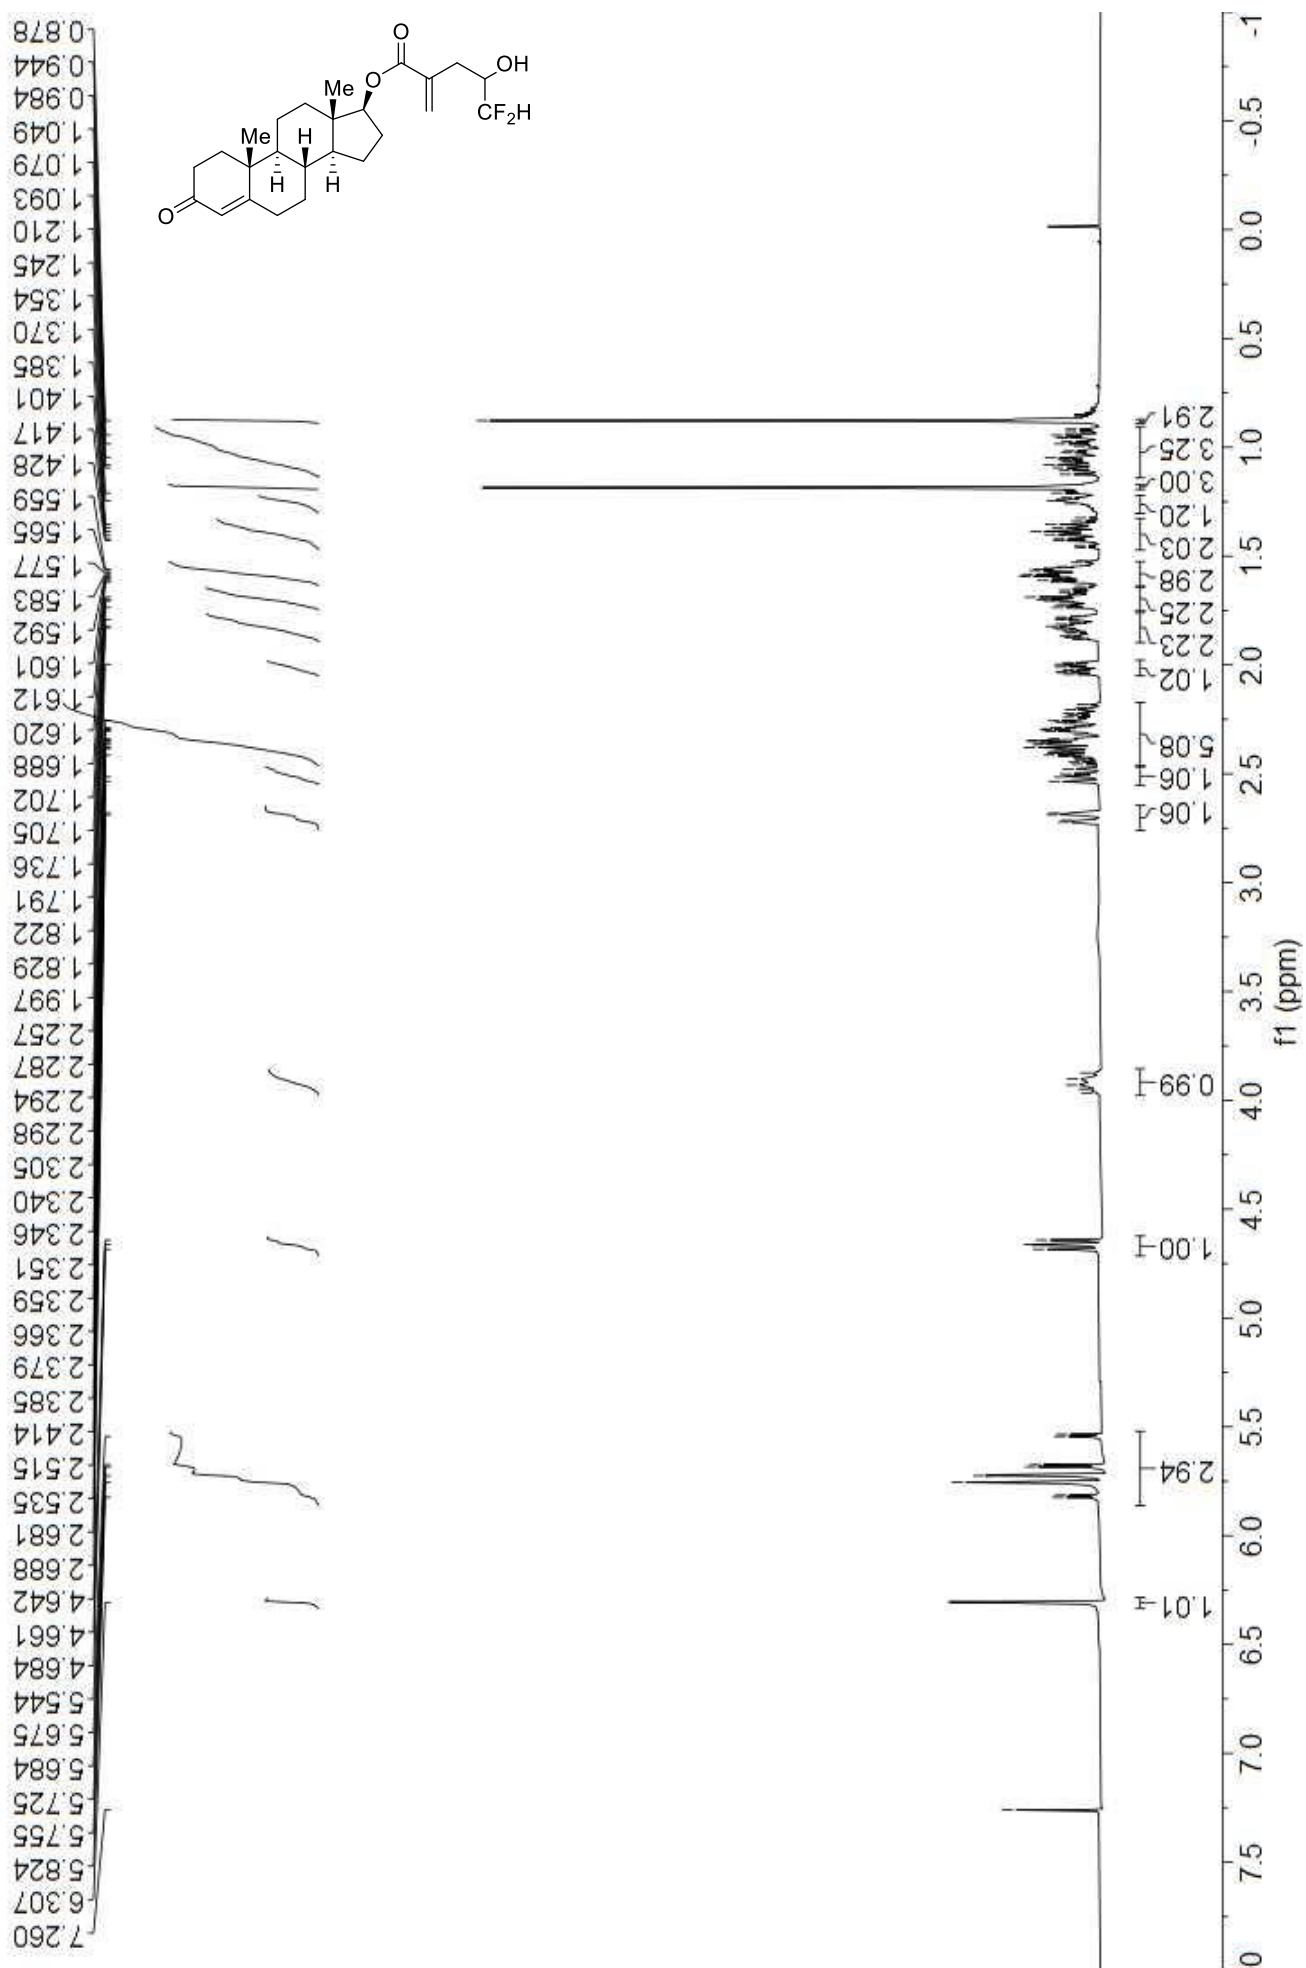



$^{13}\text{C}$  NMR of **14d** ( $\text{CDCl}_3$ , 100 MHz, 25  $^\circ\text{C}$ )

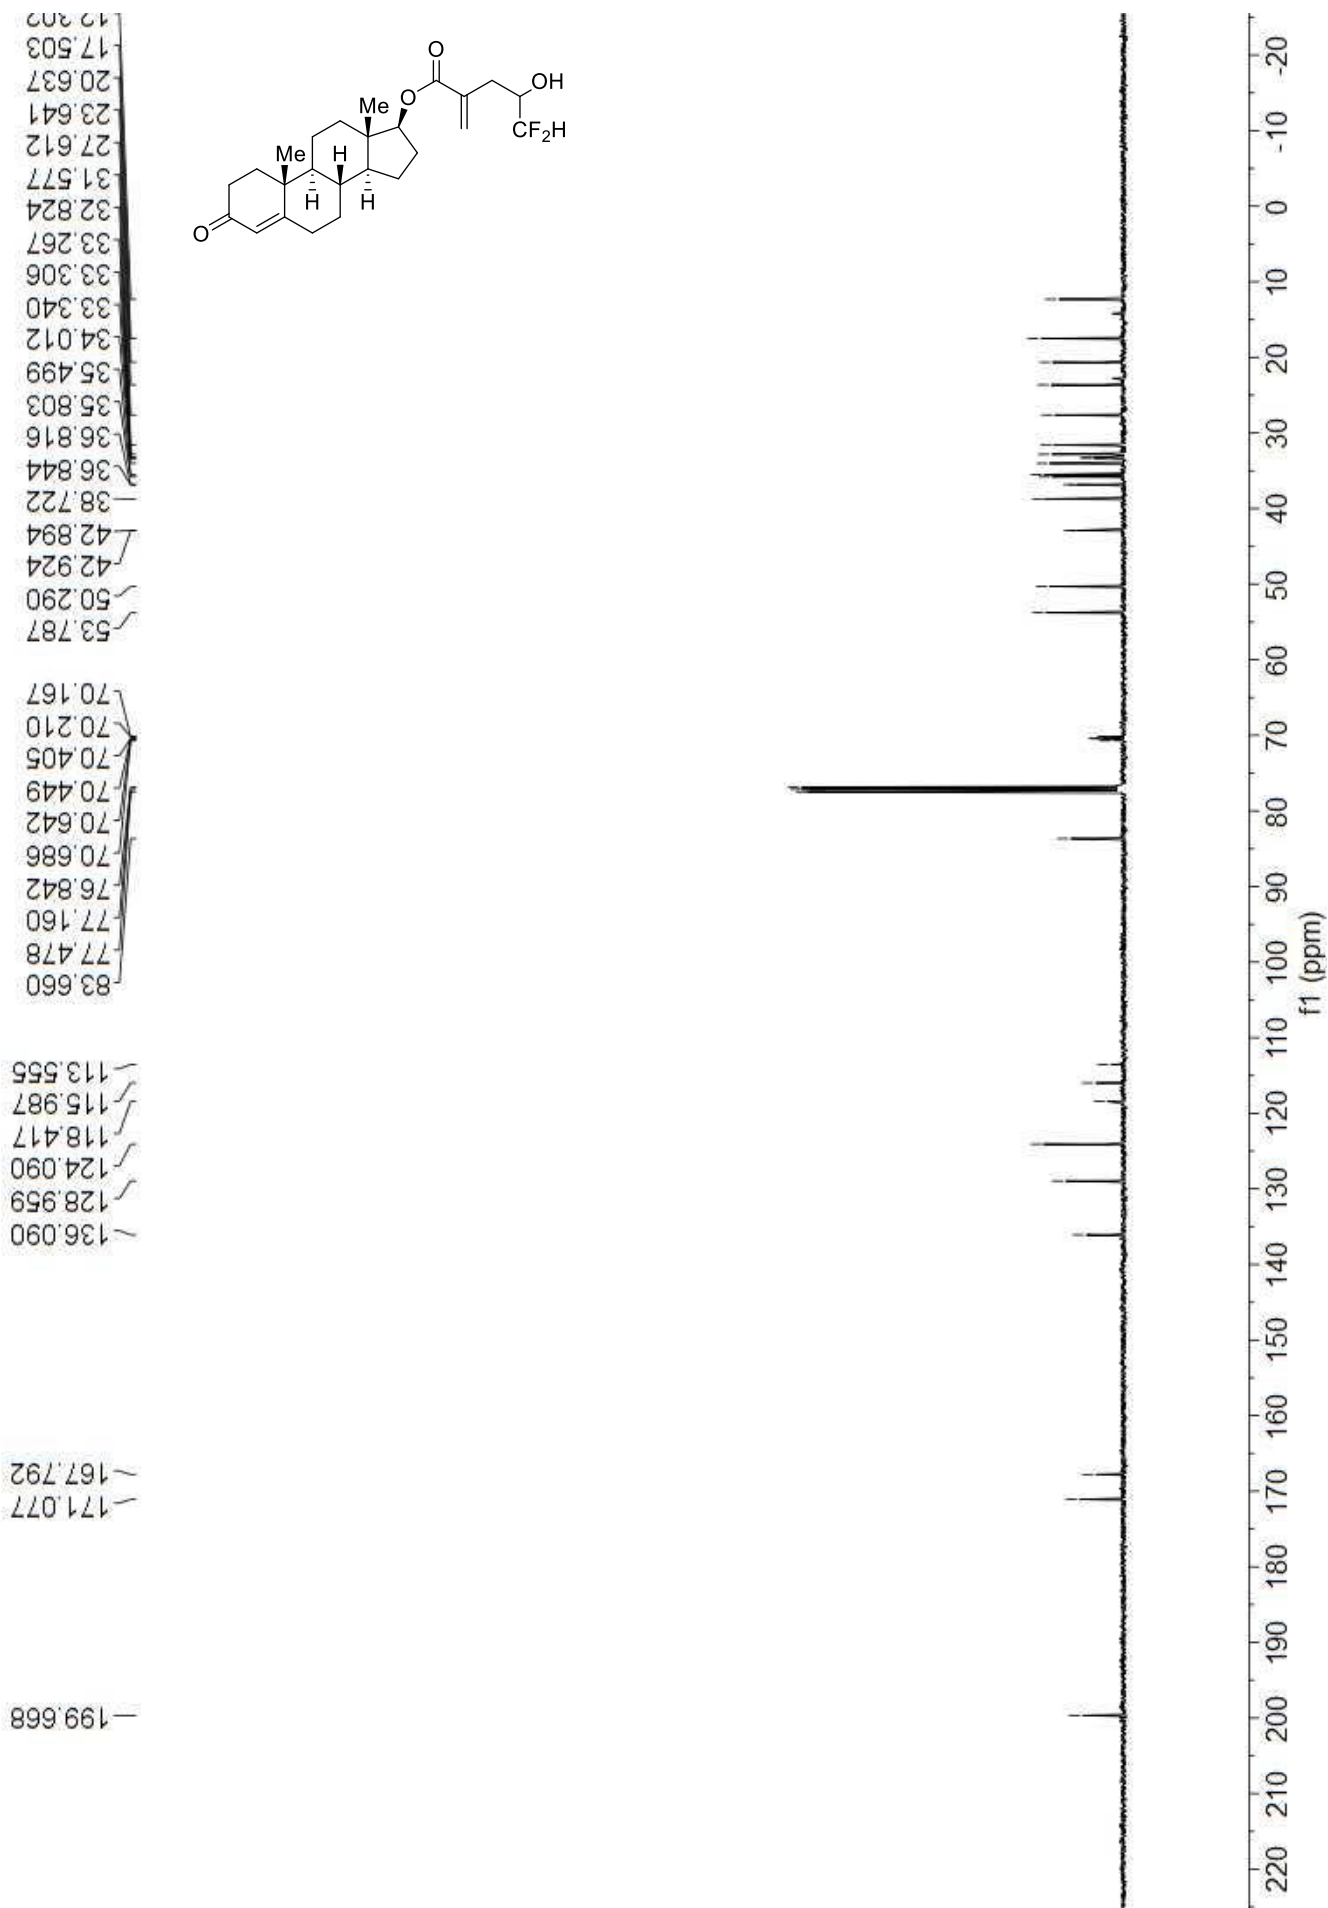

$^{19}\text{F}$  NMR of **14d** ( $\text{CDCl}_3$ , 375 MHz, 25  $^\circ\text{C}$ )

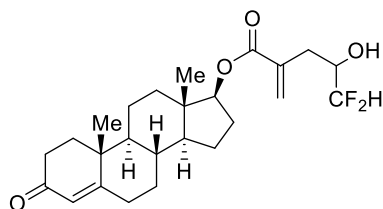

-131.495  
-131.464  
-131.346  
-131.315  
-130.735  
-130.704  
-130.586  
-130.555  
-129.712  
-129.684  
-129.640  
-129.613  
-129.564  
-129.536  
-129.493  
-129.465  
-128.953  
-128.925  
-128.881  
-128.853  
-128.804  
-128.776  
-128.733  
-128.705

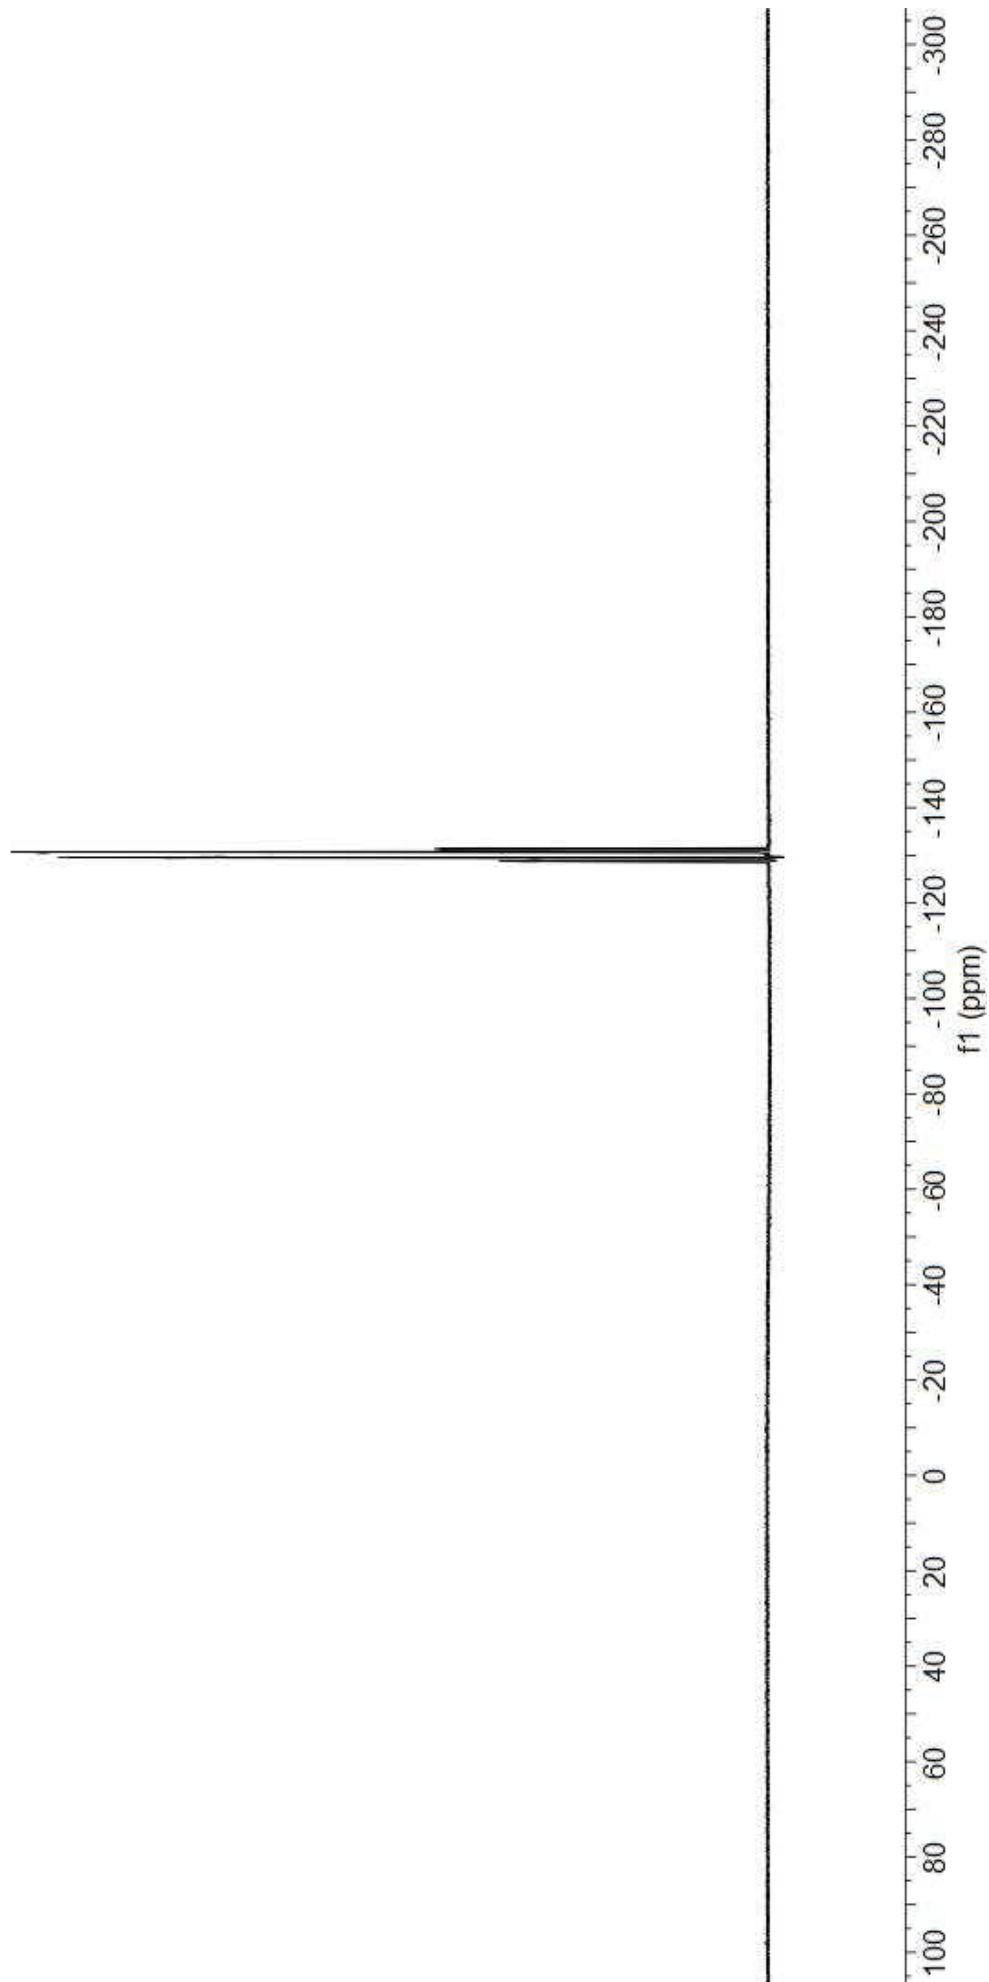

<sup>1</sup>H NMR of **14e** (CDCl<sub>3</sub>, 400 MHz, 25 °C)

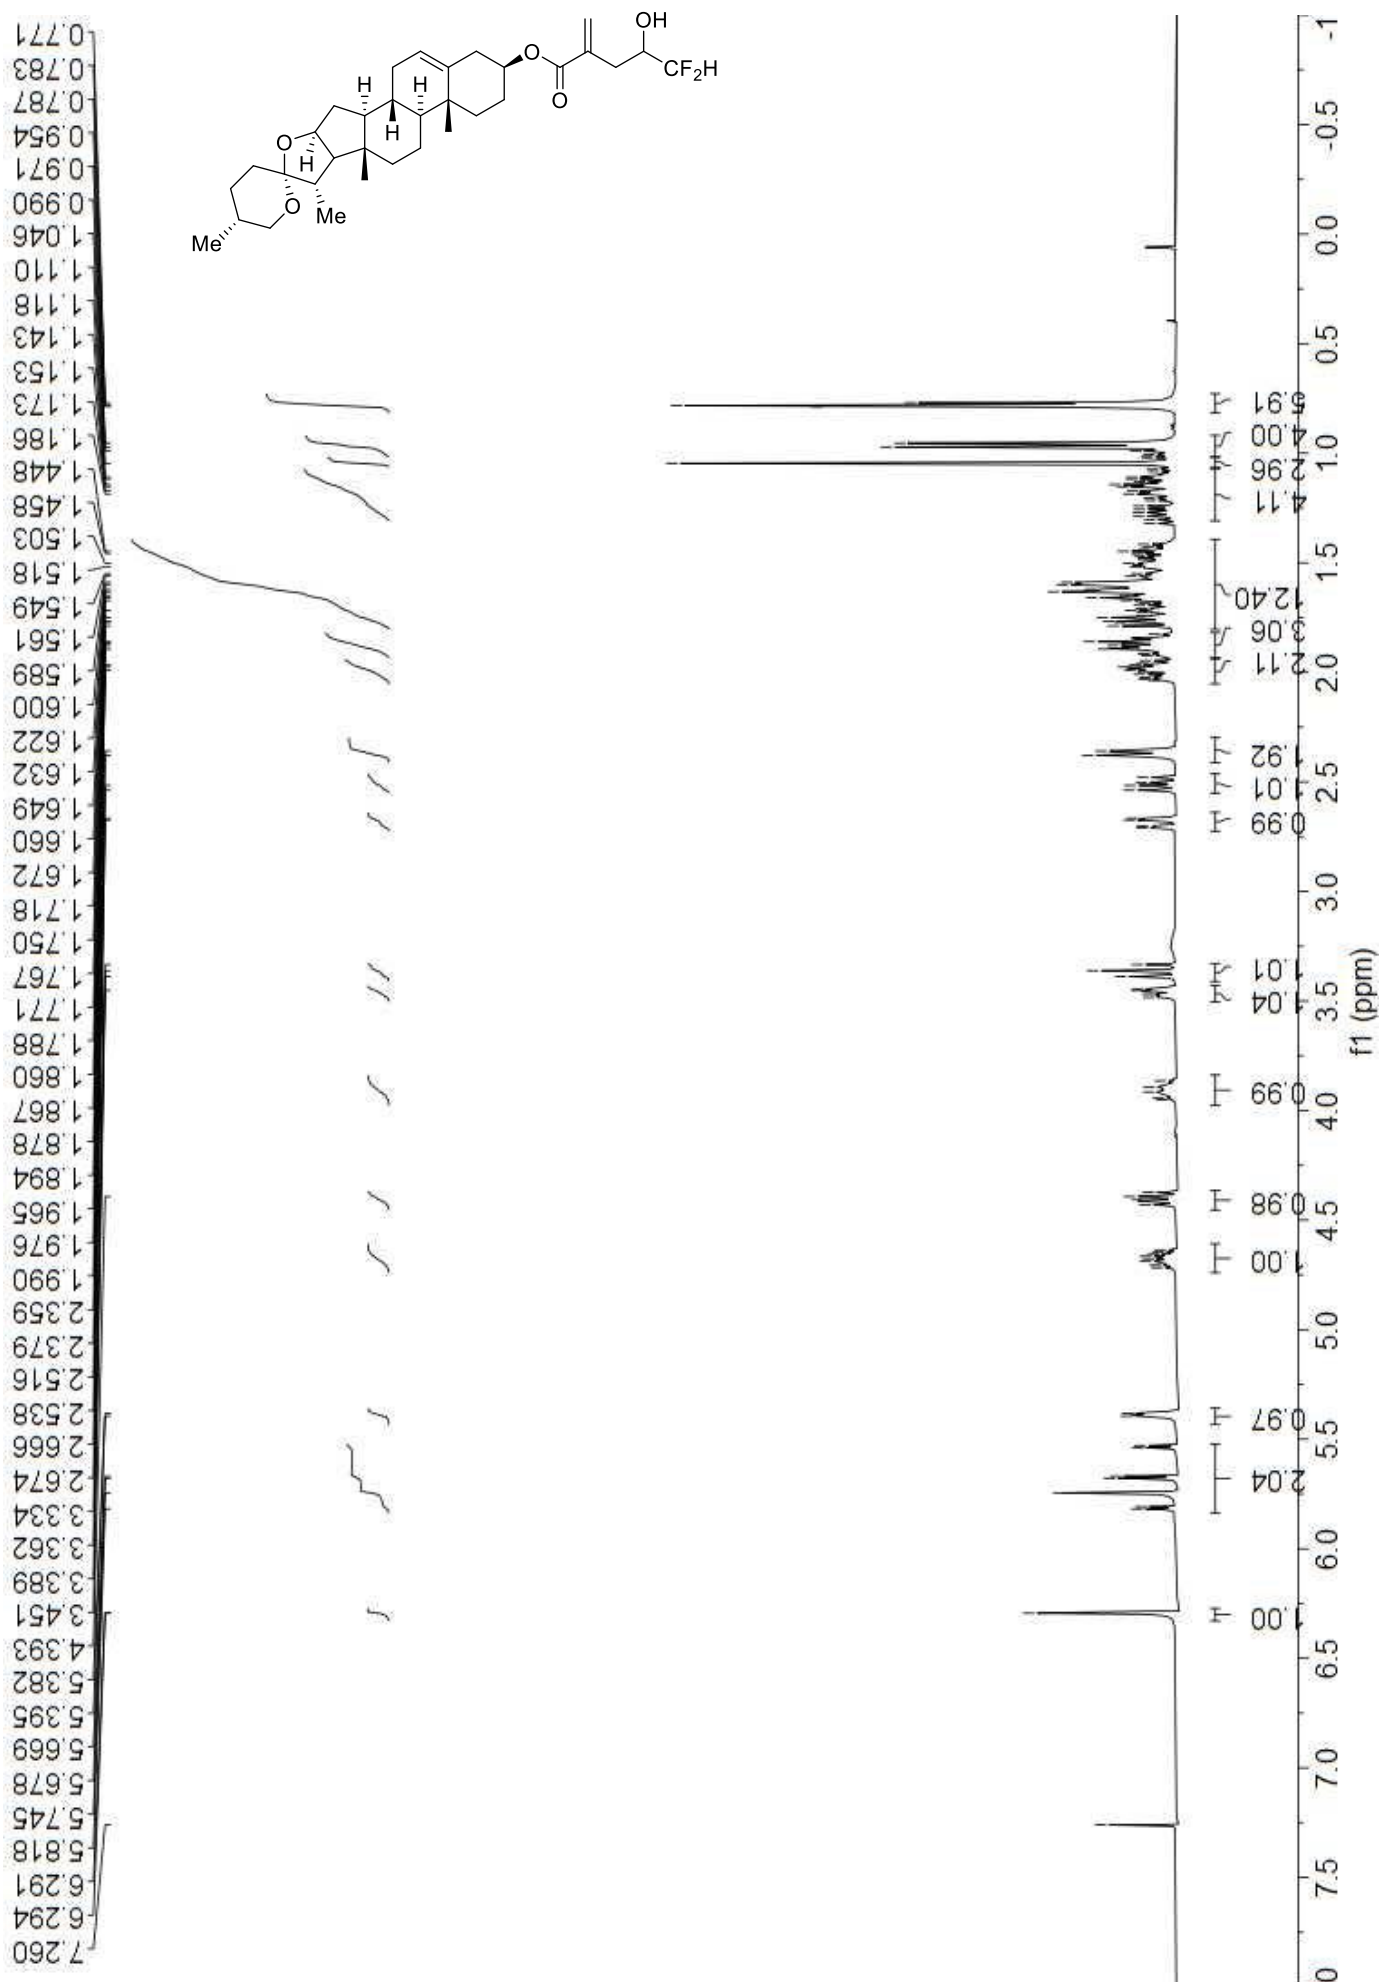

$^{13}\text{C}$  NMR of **14e** ( $\text{CDCl}_3$ , 100 MHz, 25 °C)

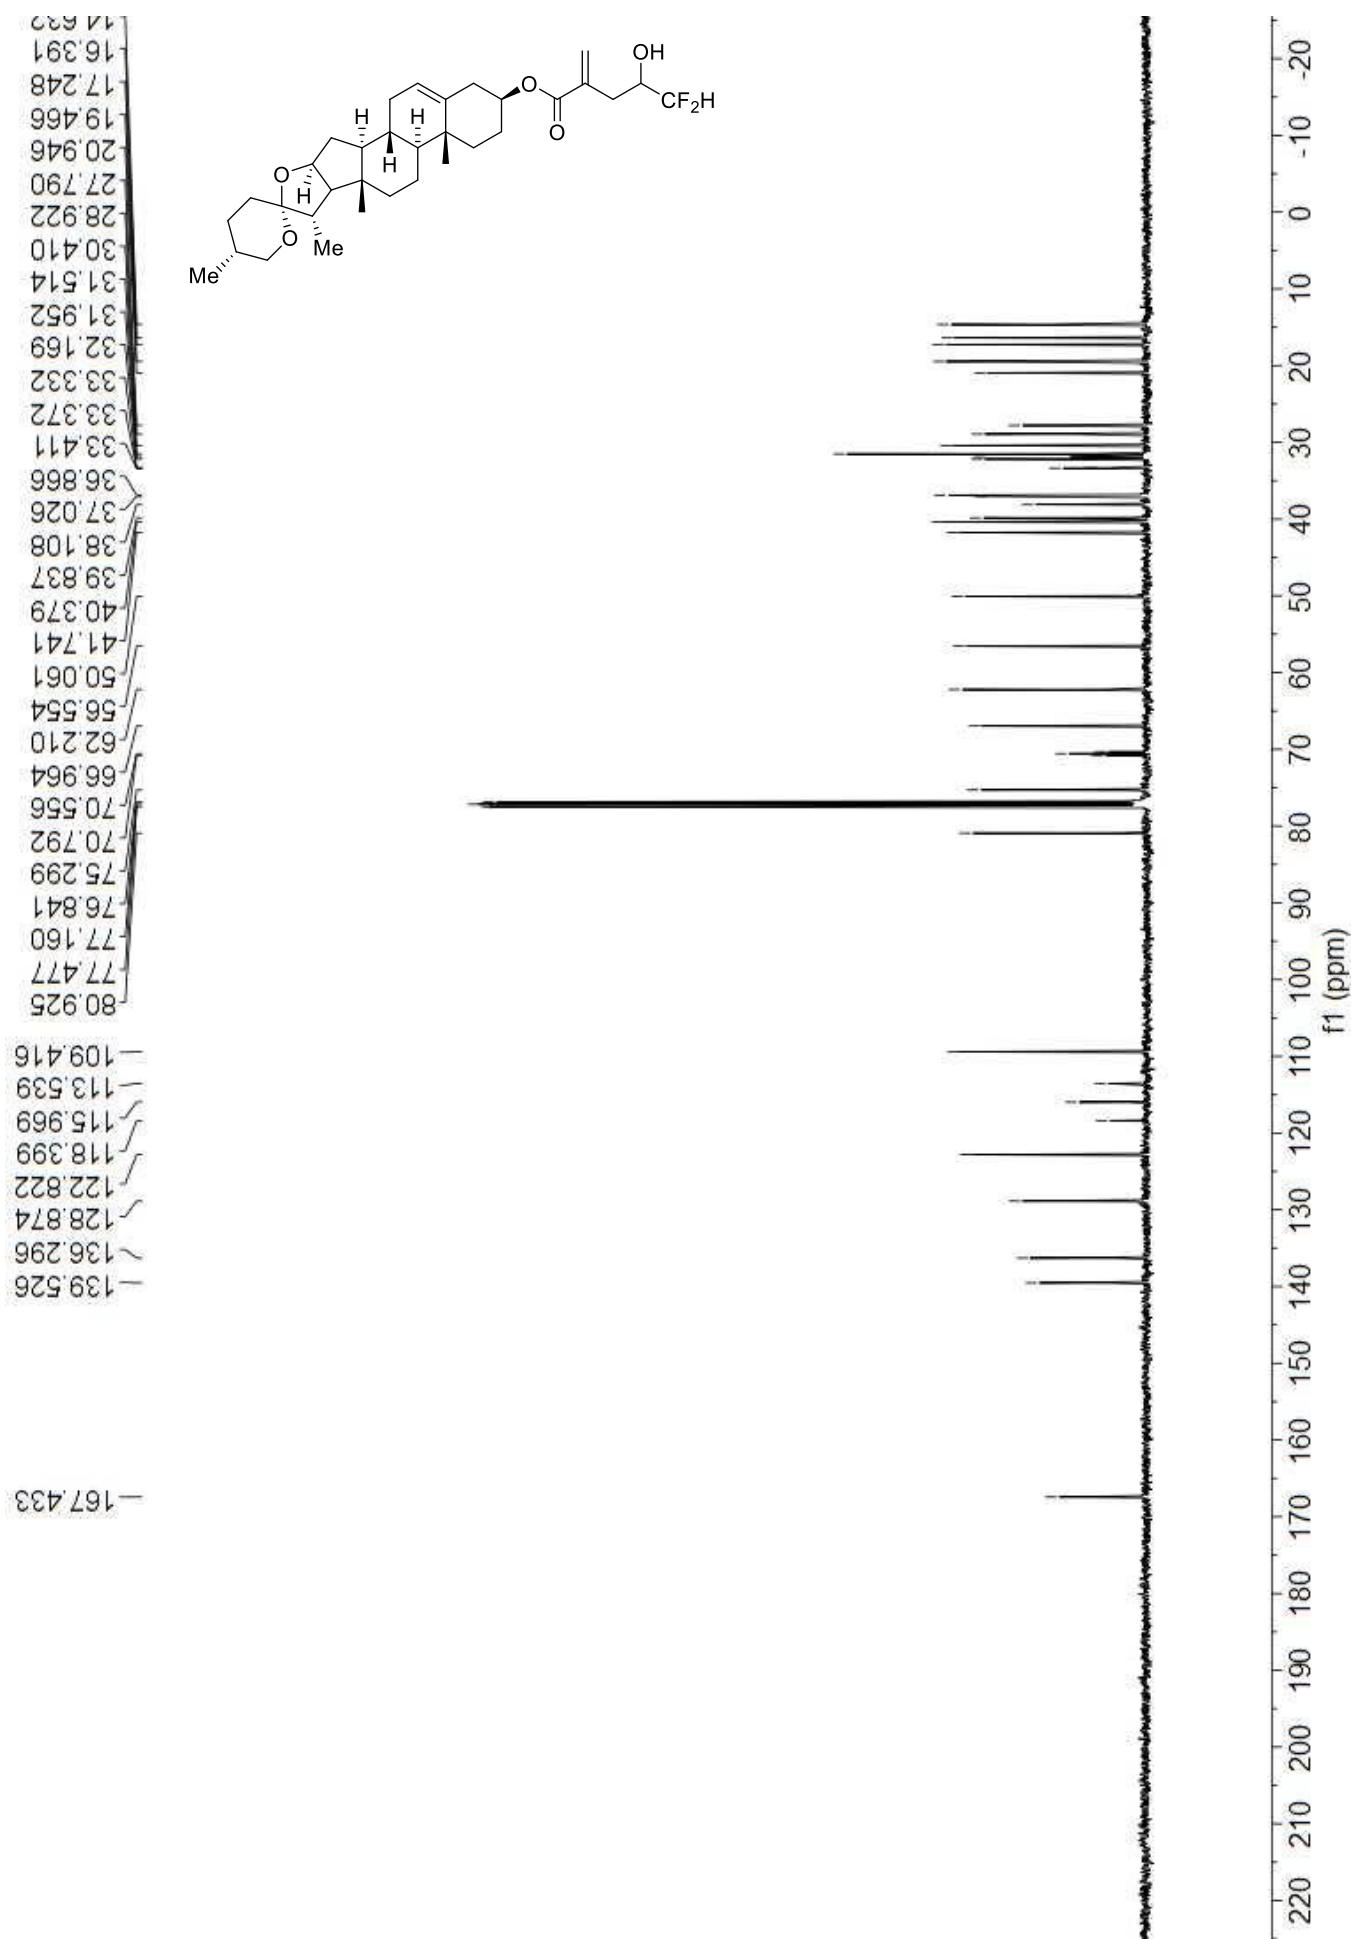

$^{19}\text{F}$  NMR of **14e** ( $\text{CDCl}_3$ , 375 MHz, 25  $^\circ\text{C}$ )

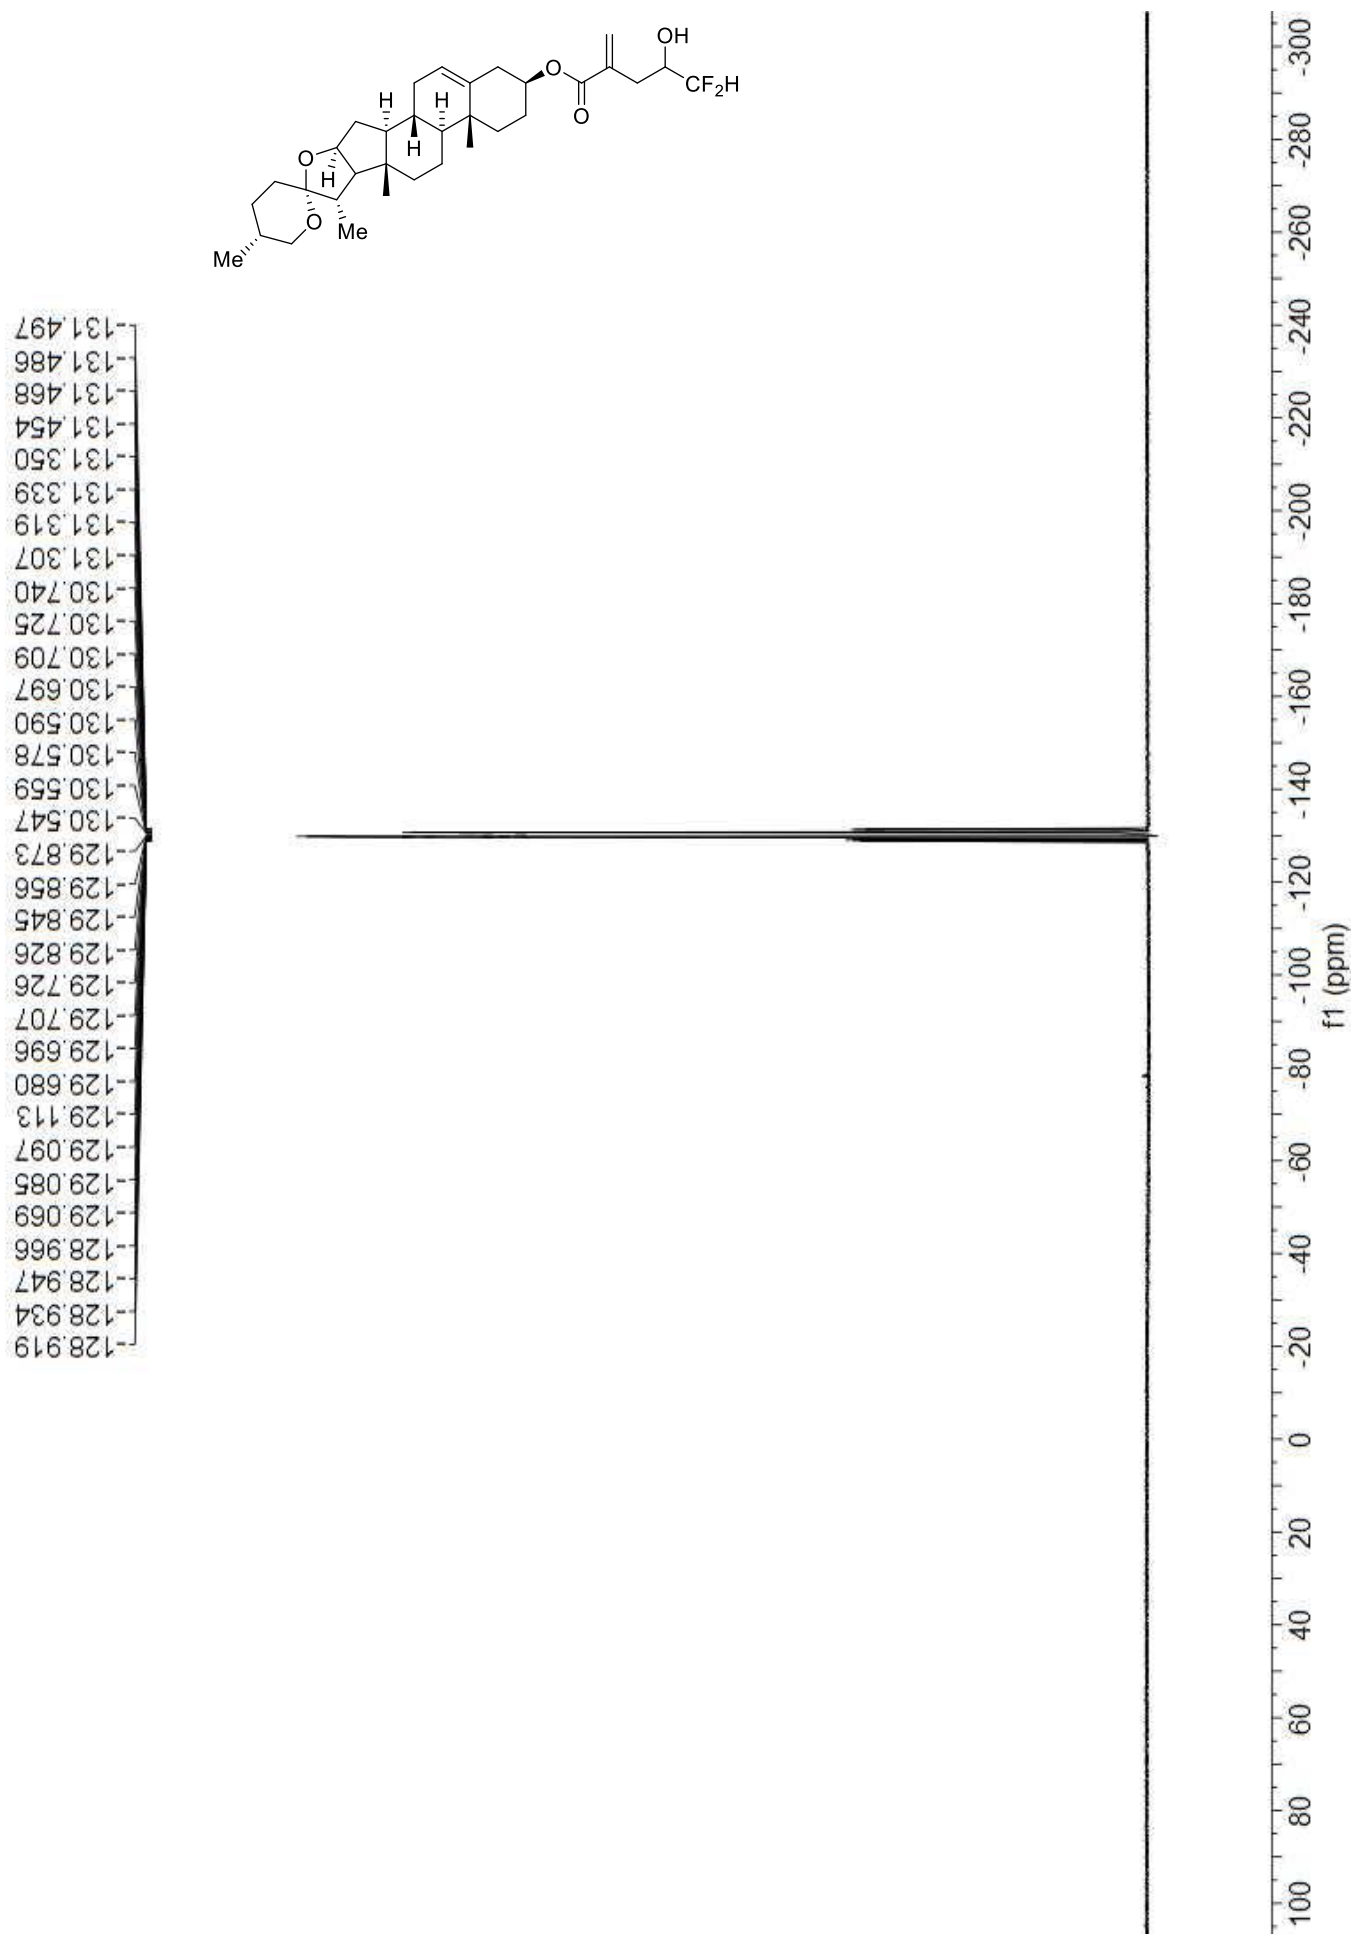

<sup>1</sup>H NMR of **14f-a** (CDCl<sub>3</sub>, 400 MHz, 25 °C)

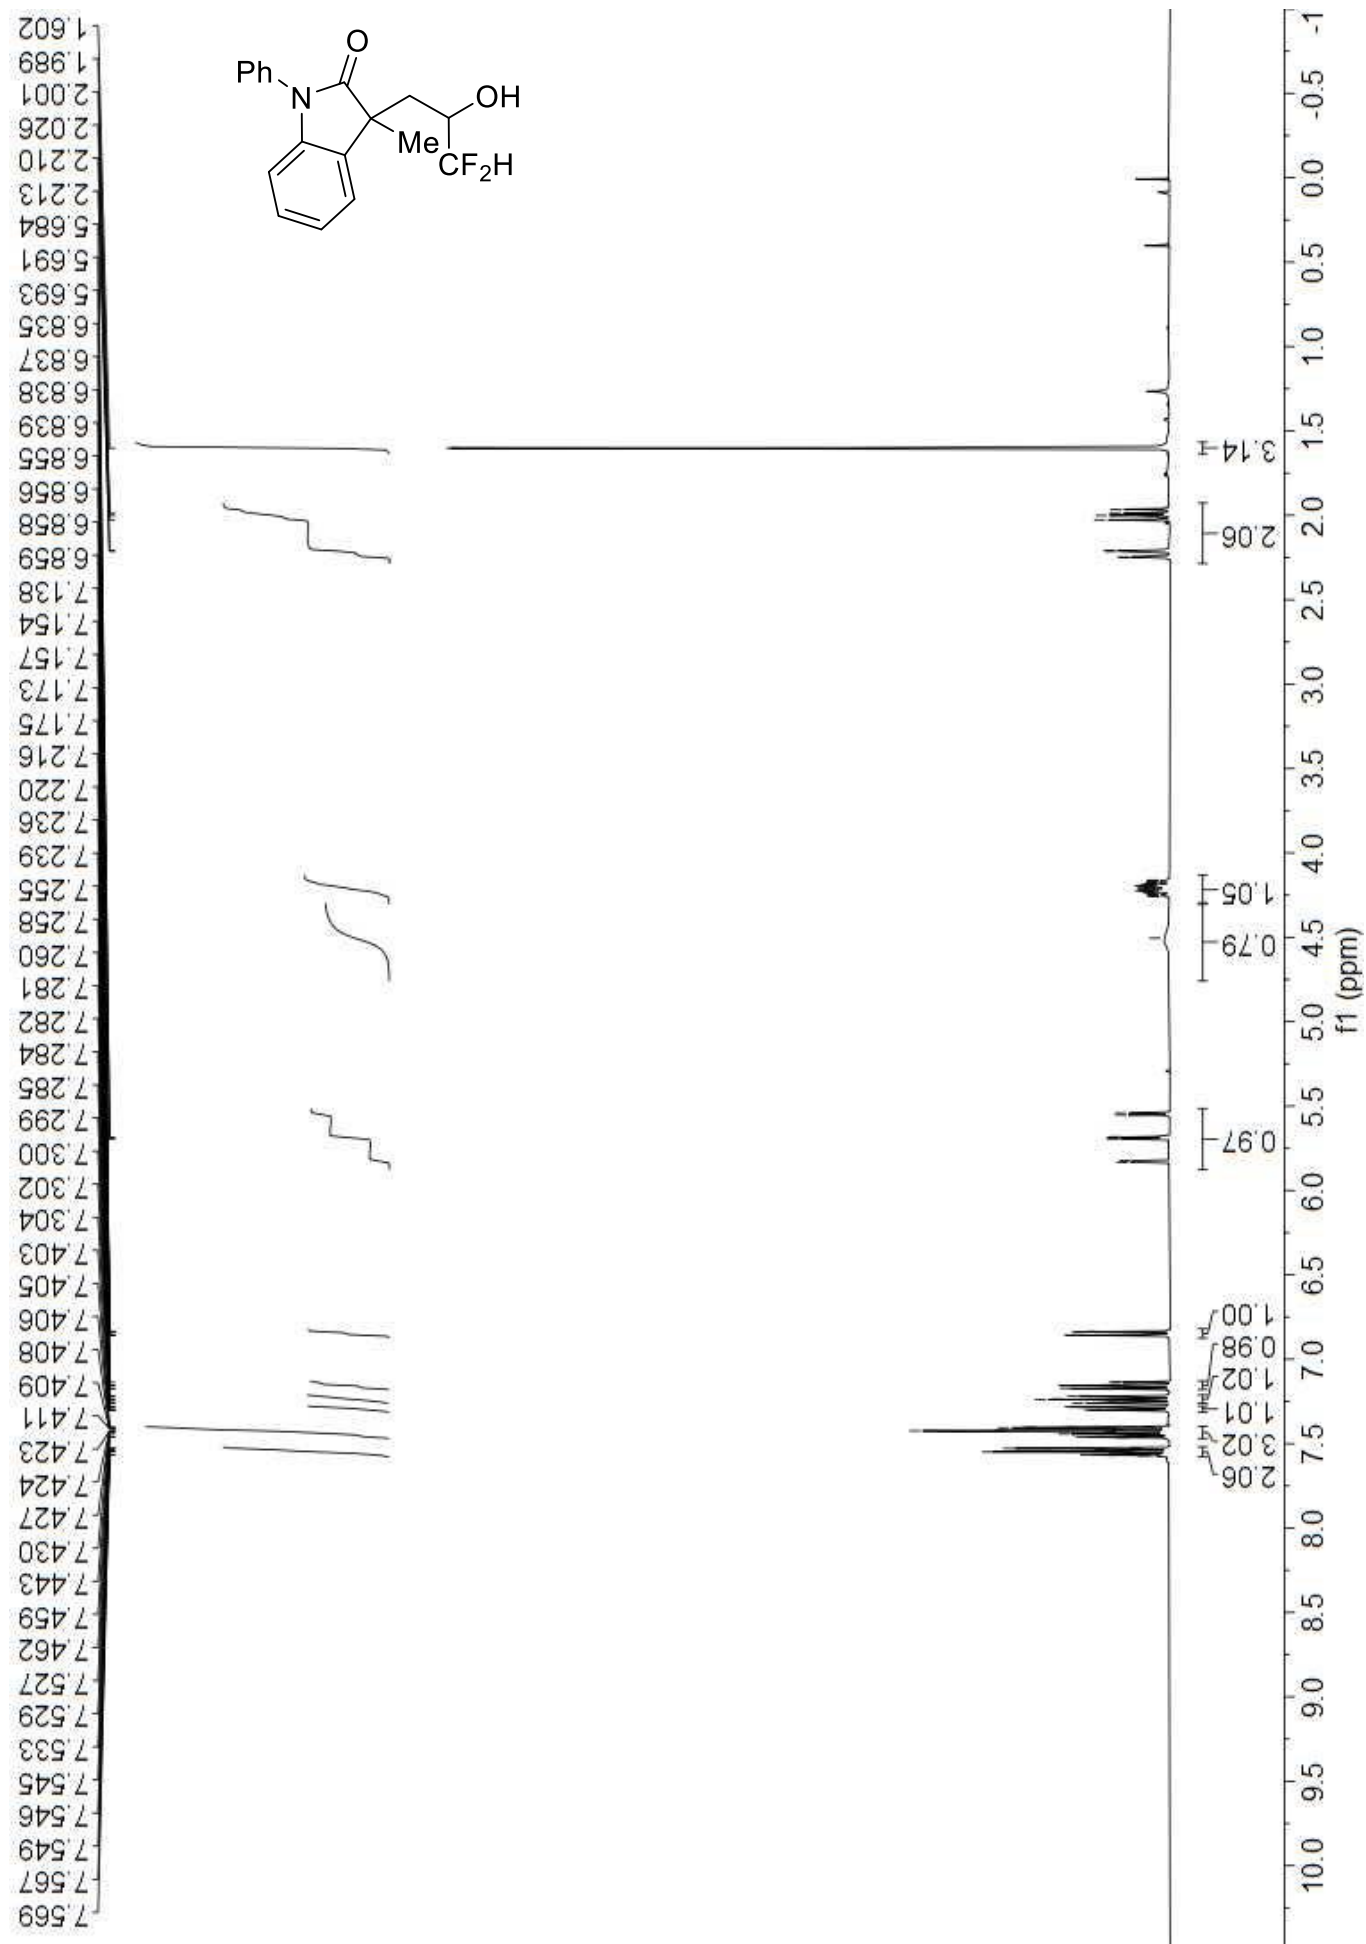

$^{13}\text{C}$  NMR of **14f-a** ( $\text{CDCl}_3$ , 100 MHz, 25 °C)

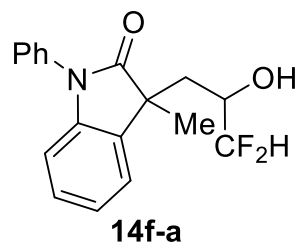

23.139  
36.308  
36.344  
36.350  
36.383  
46.849

68.434  
68.669  
68.685  
68.920  
76.842  
77.160  
77.479

110.110  
113.693  
116.110  
116.132  
118.549  
122.912  
123.900  
126.644  
128.406  
128.612  
129.845  
134.036  
134.480  
142.435

181.697

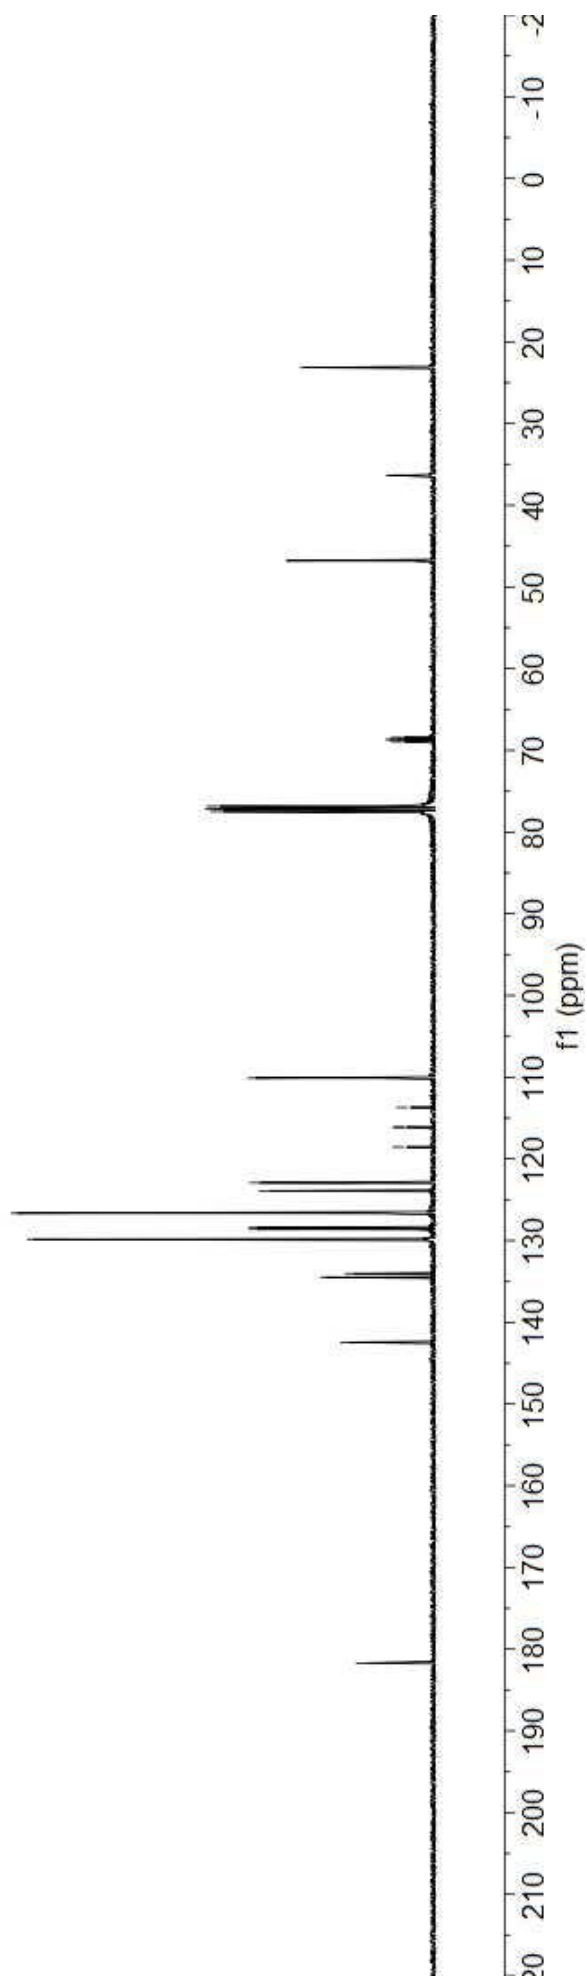



$^{19}\text{F}$  NMR of **14f-a** ( $\text{CDCl}_3$ , 375 MHz, 25  $^\circ\text{C}$ )

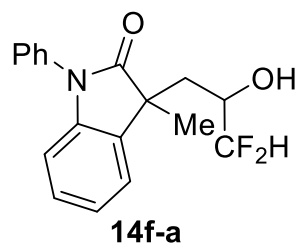

132.611  
132.574  
132.461  
132.424  
131.854  
131.817  
131.704  
131.667  
127.829  
127.805  
127.682  
127.658  
127.073  
127.048  
126.925  
126.901

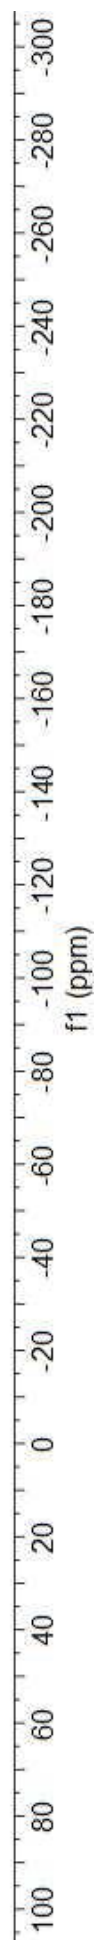



<sup>1</sup>H NMR of **14f-b** (CDCl<sub>3</sub>, 400 MHz, 25 °C)

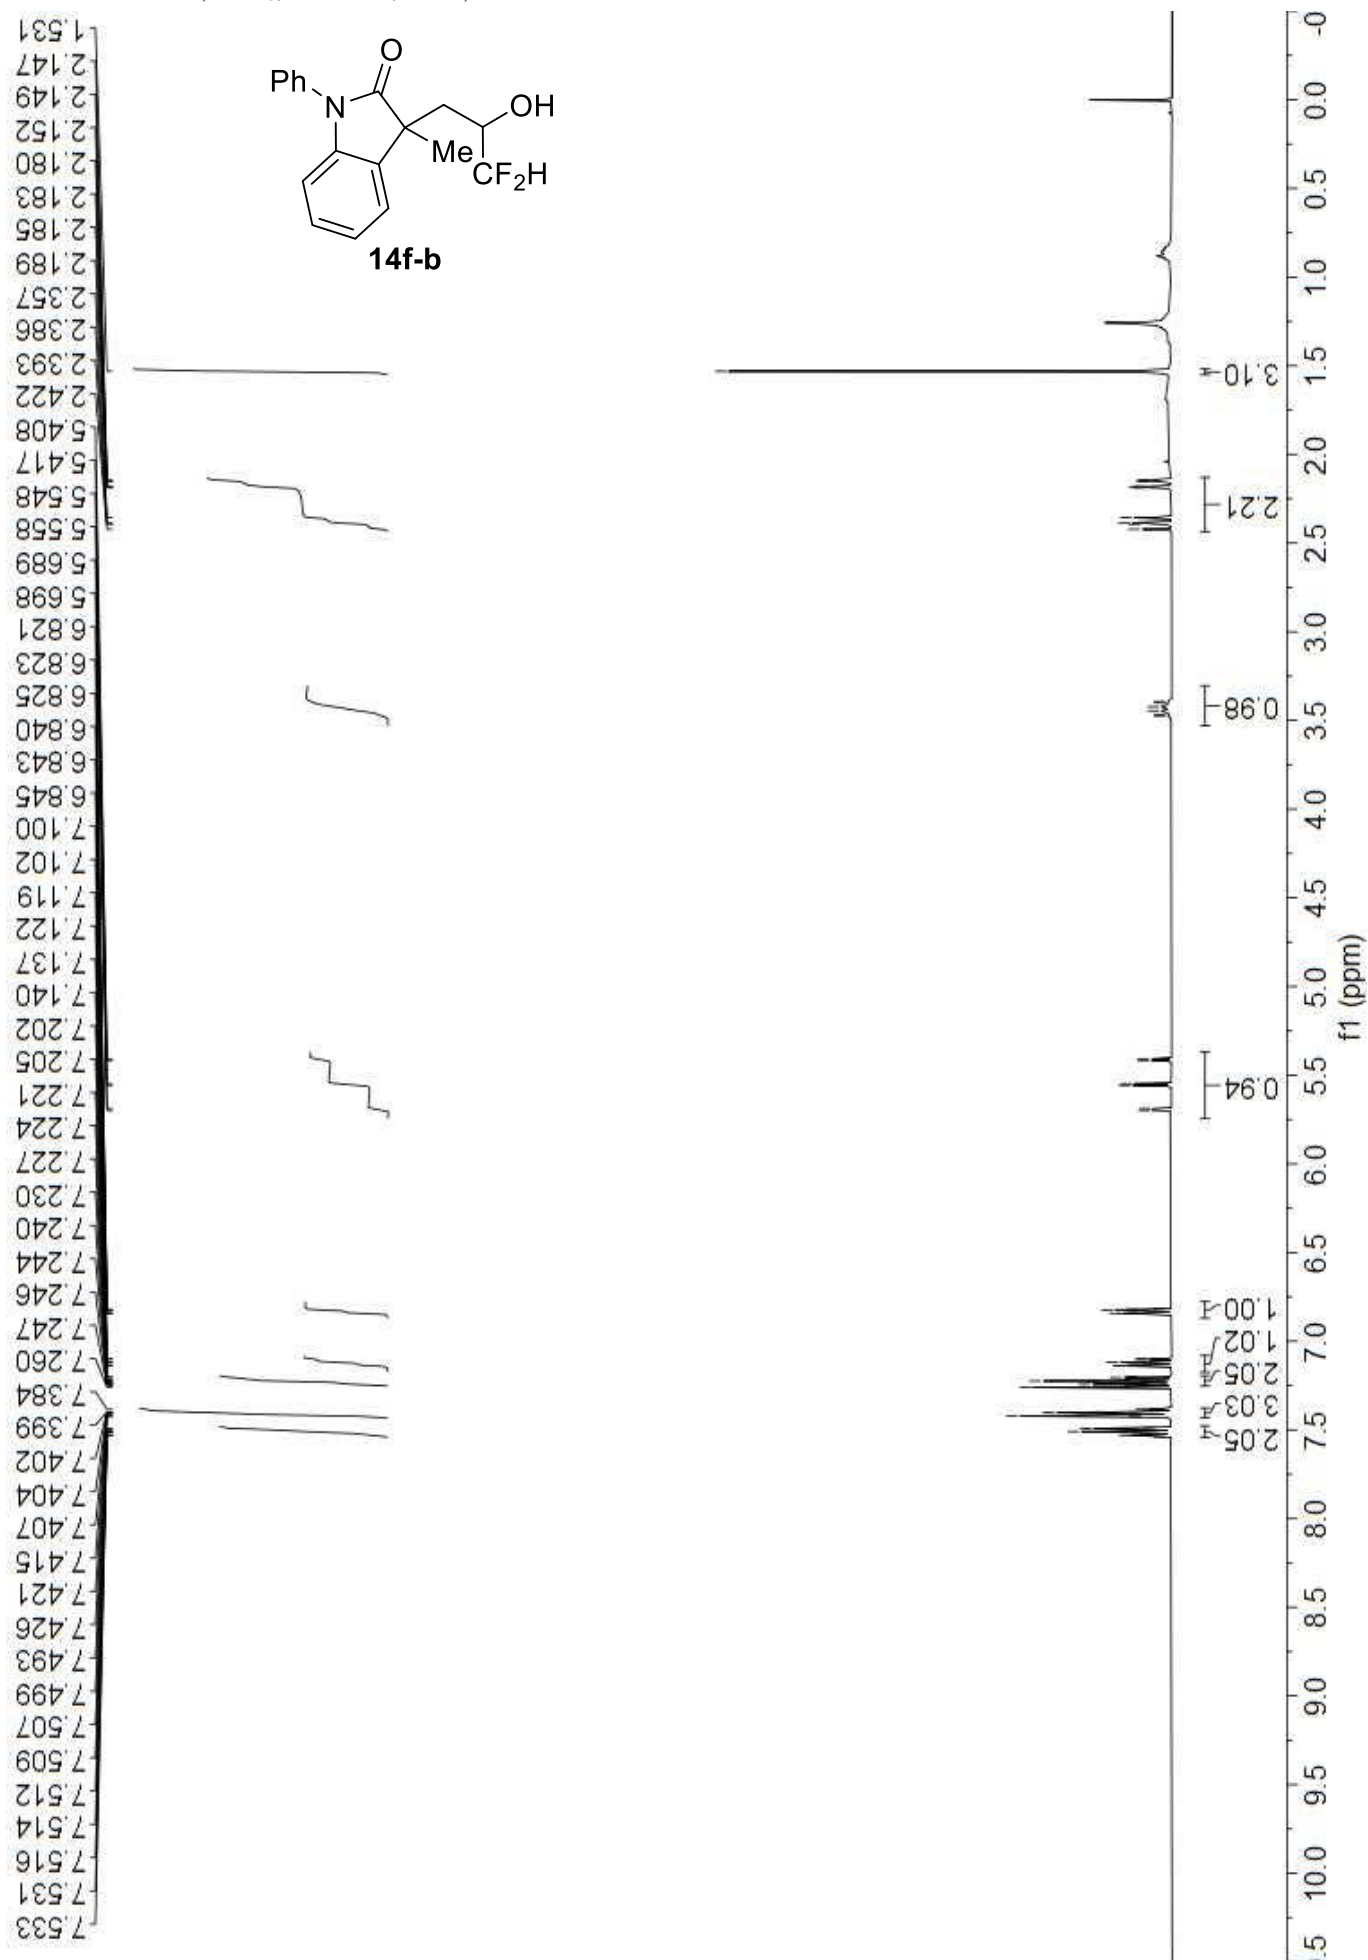

$^{13}\text{C}$  NMR of **14f-b** ( $\text{CDCl}_3$ , 100 MHz, 25  $^\circ\text{C}$ )

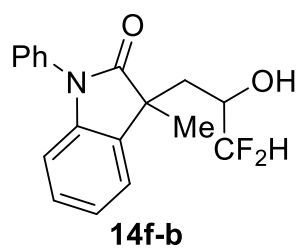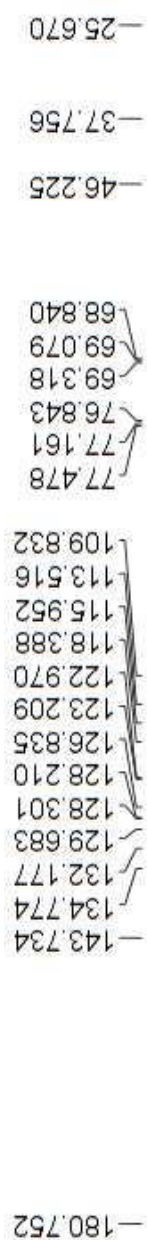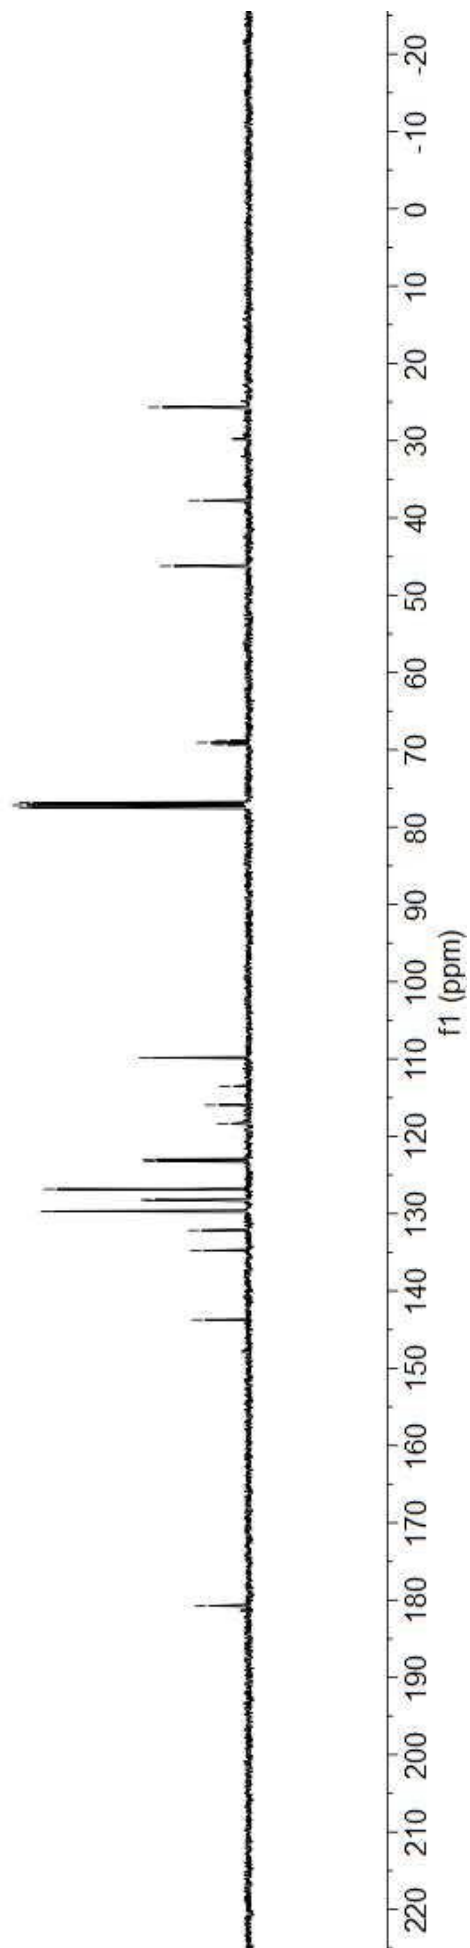

$^{19}\text{F}$  NMR of **14f-b** ( $\text{CDCl}_3$ , 375 MHz, 25 °C)

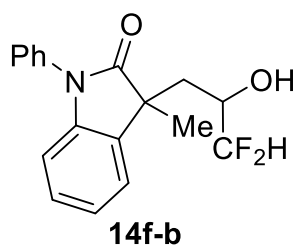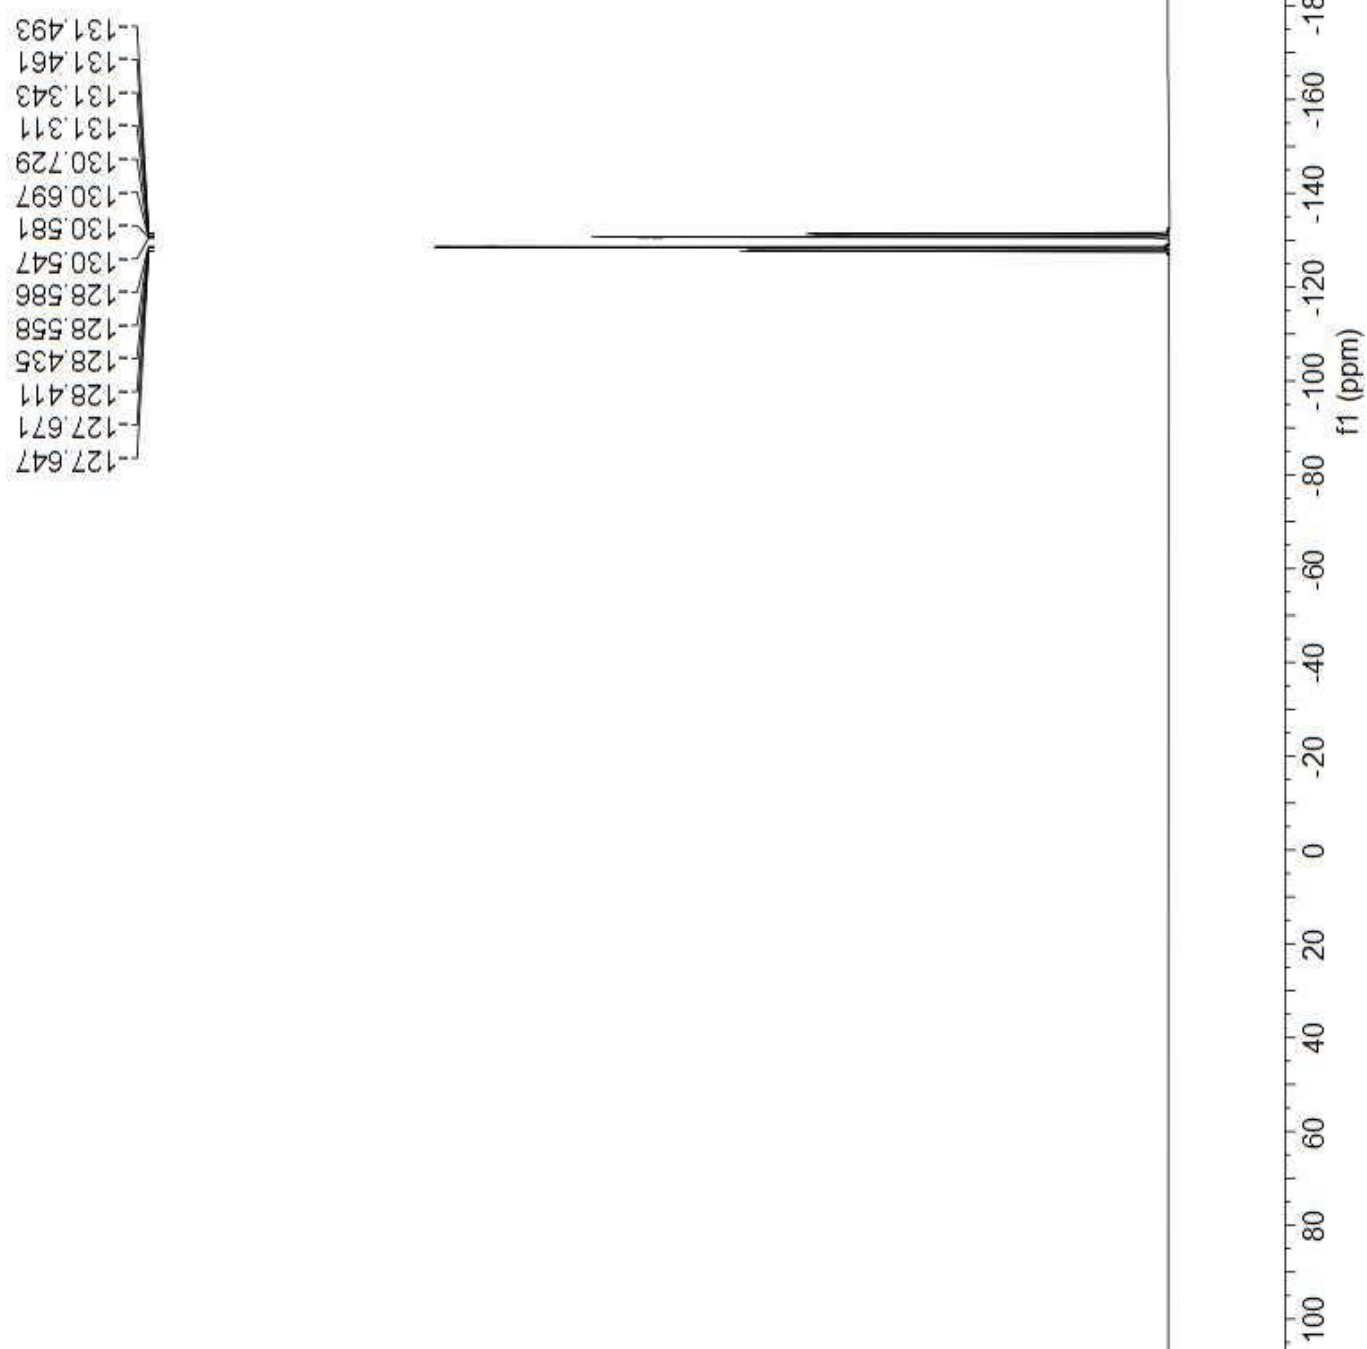

<sup>1</sup>H NMR of **14g-a** (CDCl<sub>3</sub>, 400 MHz, 25 °C)

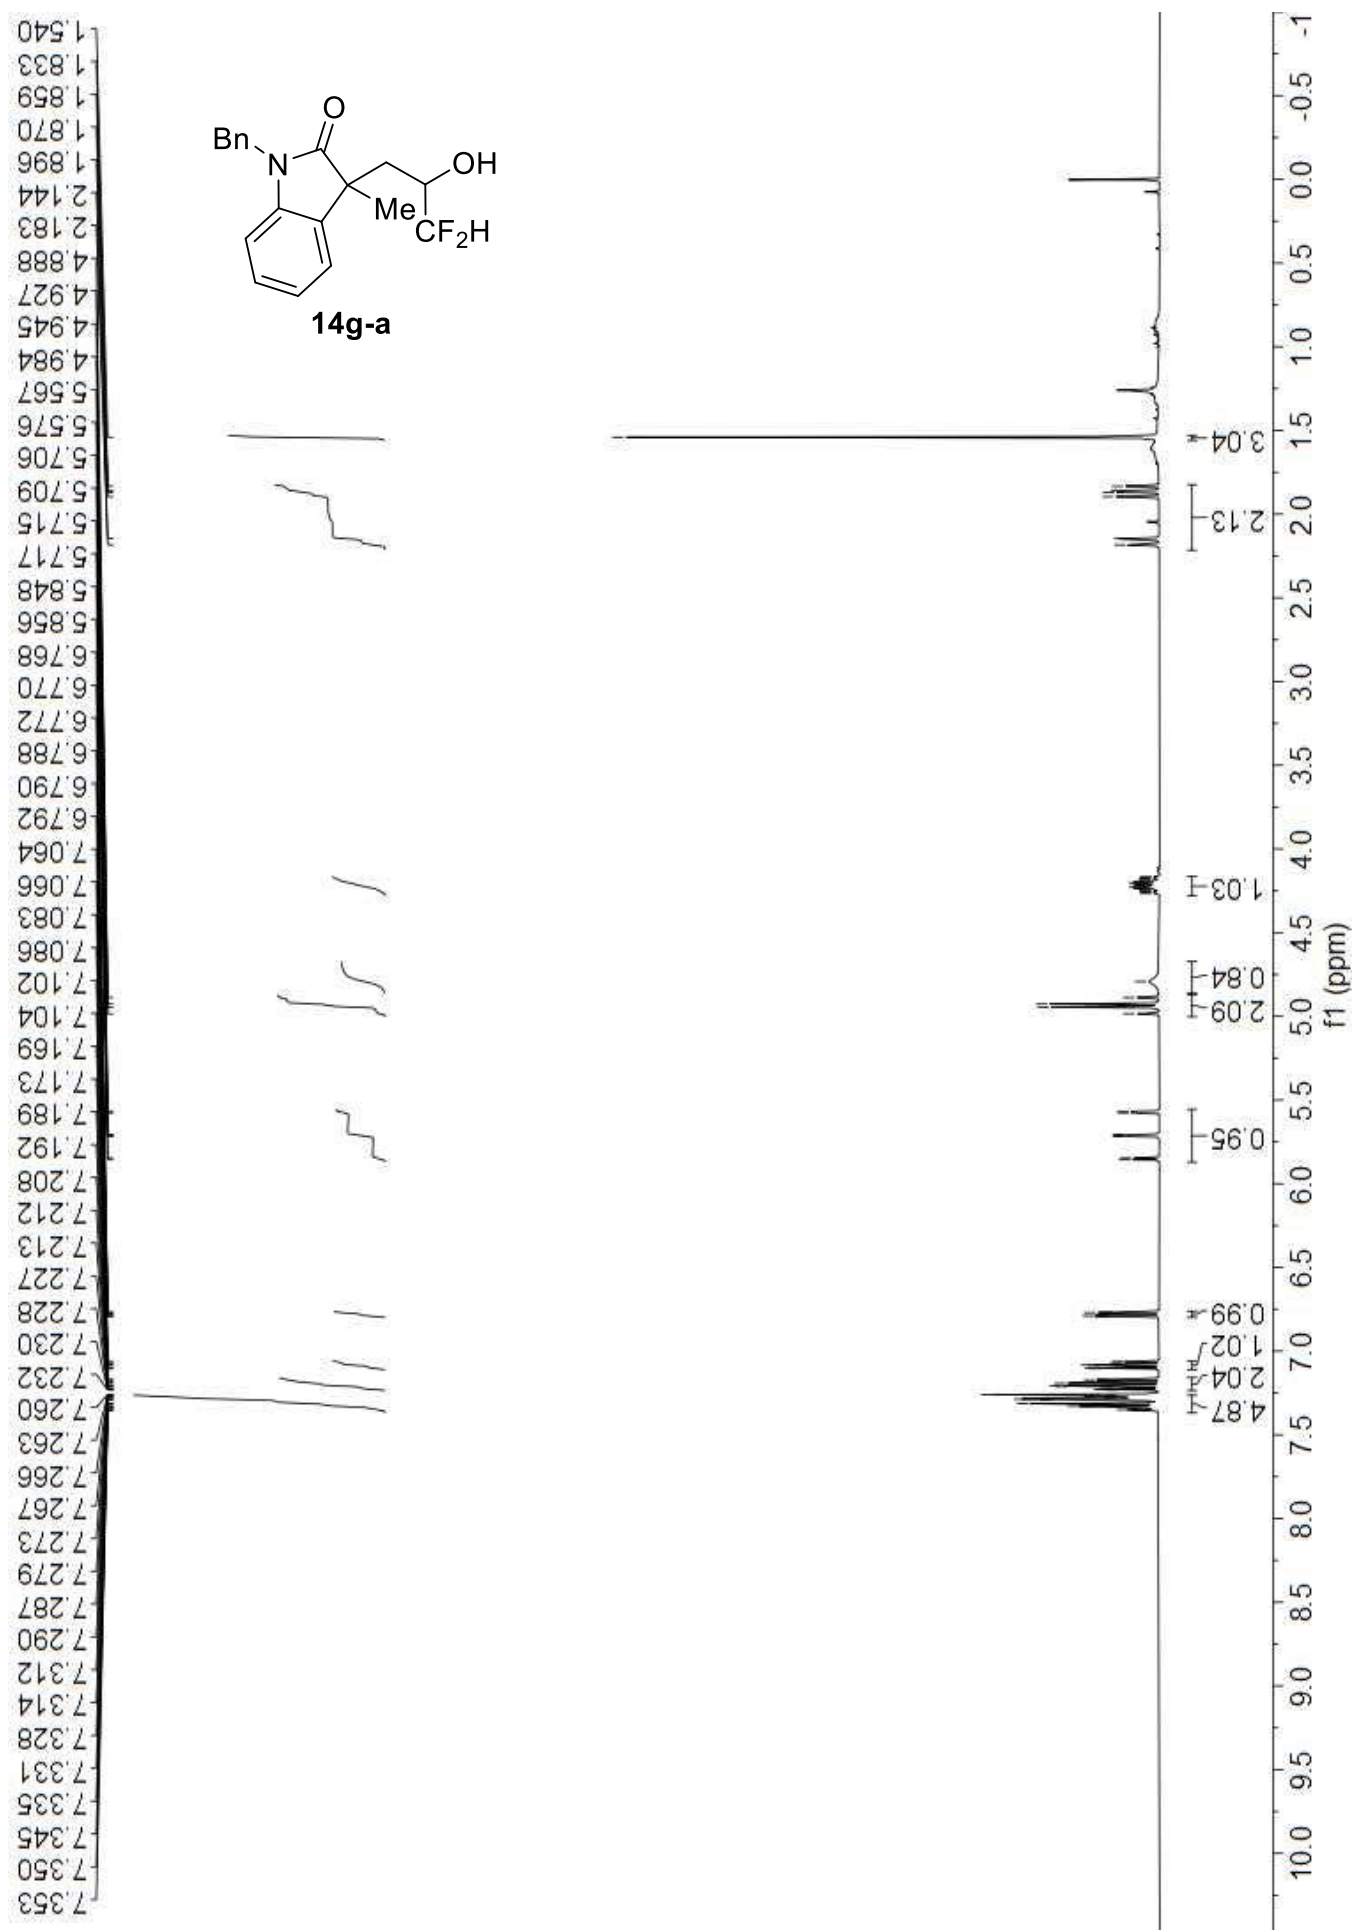

$^{13}\text{C}$  NMR of **14g-a** ( $\text{CDCl}_3$ , 100 MHz, 25 °C)

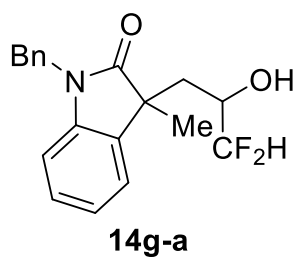

22.711

36.107  
44.099  
46.707

68.420  
68.665  
68.906  
76.842  
77.160  
77.478

109.884  
114.239  
116.209  
118.601  
122.671  
123.587  
127.340  
128.004  
128.449  
129.088  
134.812  
135.490  
141.428

182.414

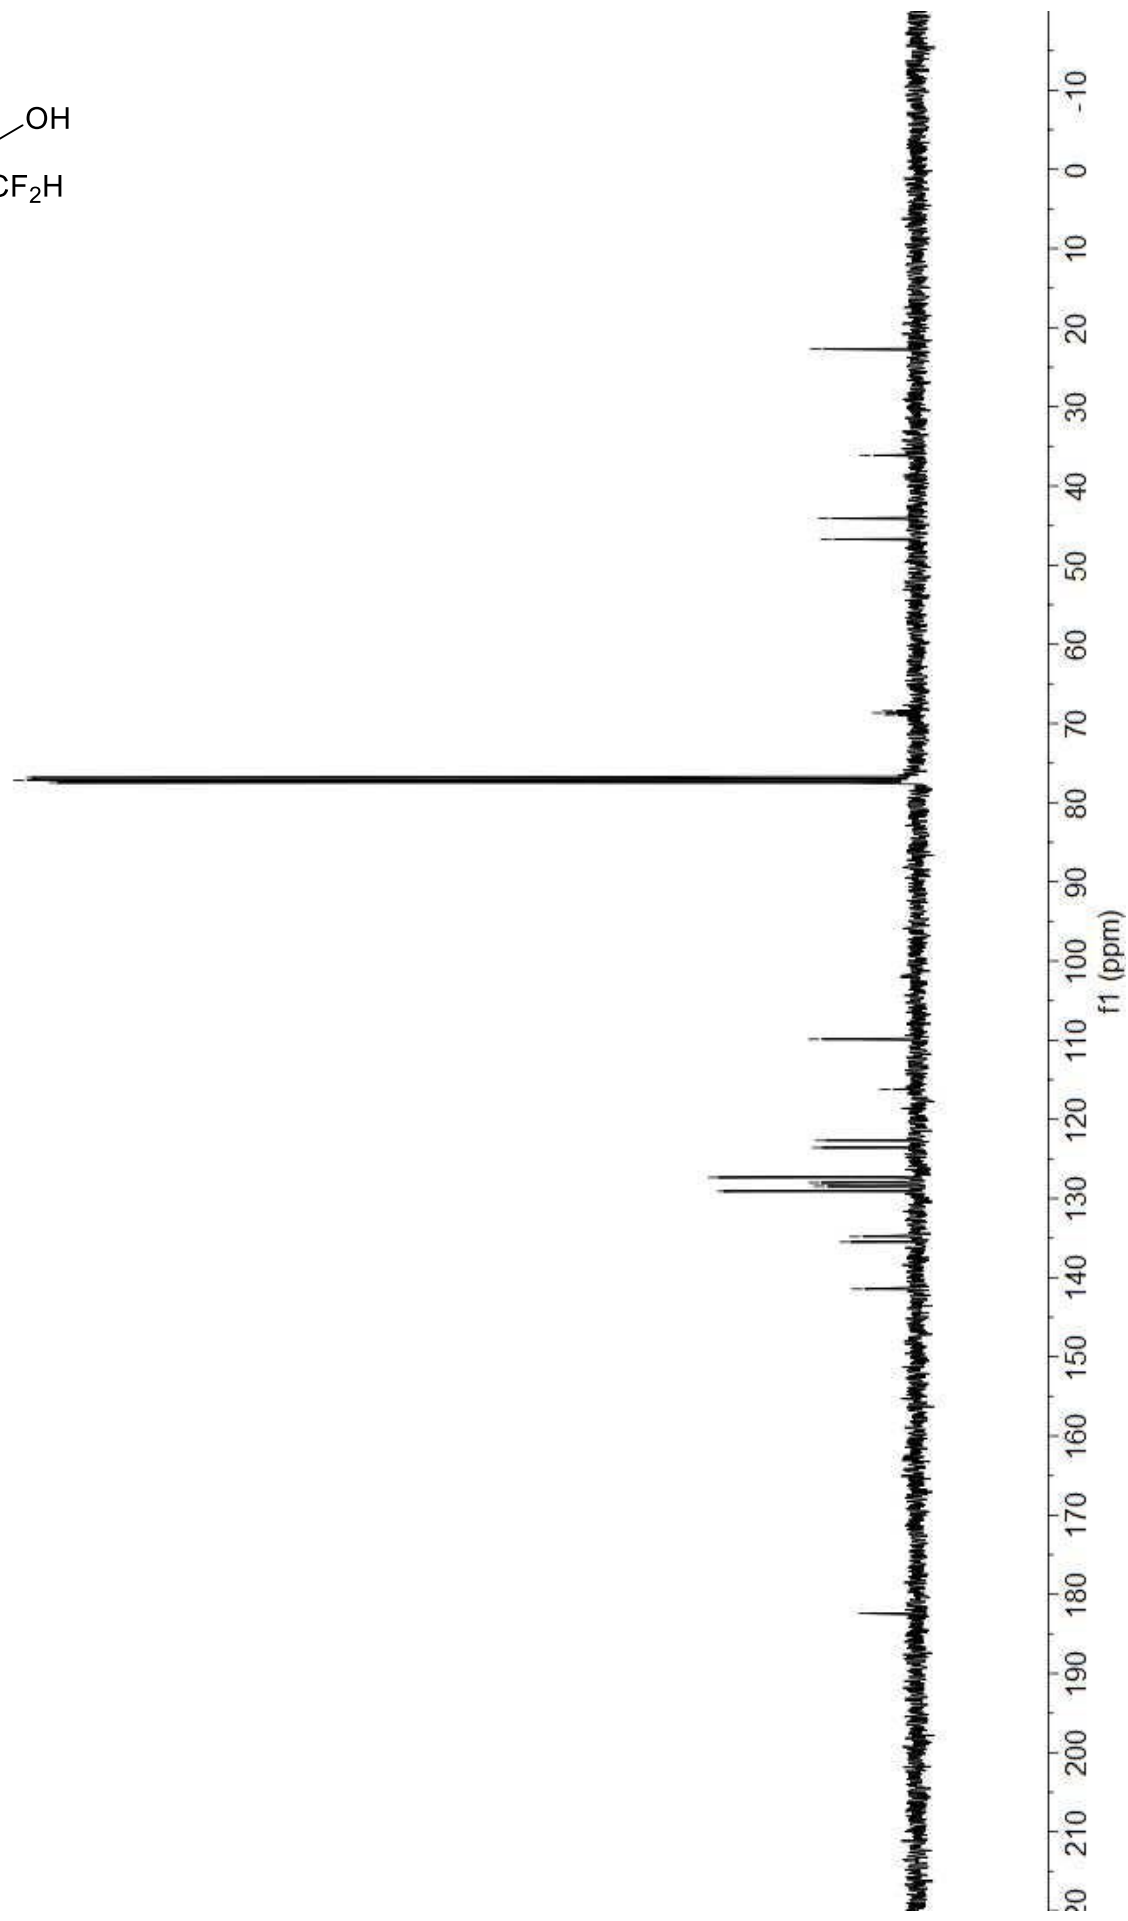

$^{19}\text{F}$  NMR of **14g-a** ( $\text{CDCl}_3$ , 375 MHz, 25  $^\circ\text{C}$ )

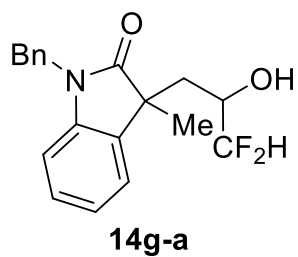

-132.786  
-132.748  
-132.636  
-132.598  
-132.030  
-131.992  
-131.879  
-131.842  
-127.809  
-127.786  
-127.662  
-127.638  
-127.053  
-127.029  
-126.906  
-126.882

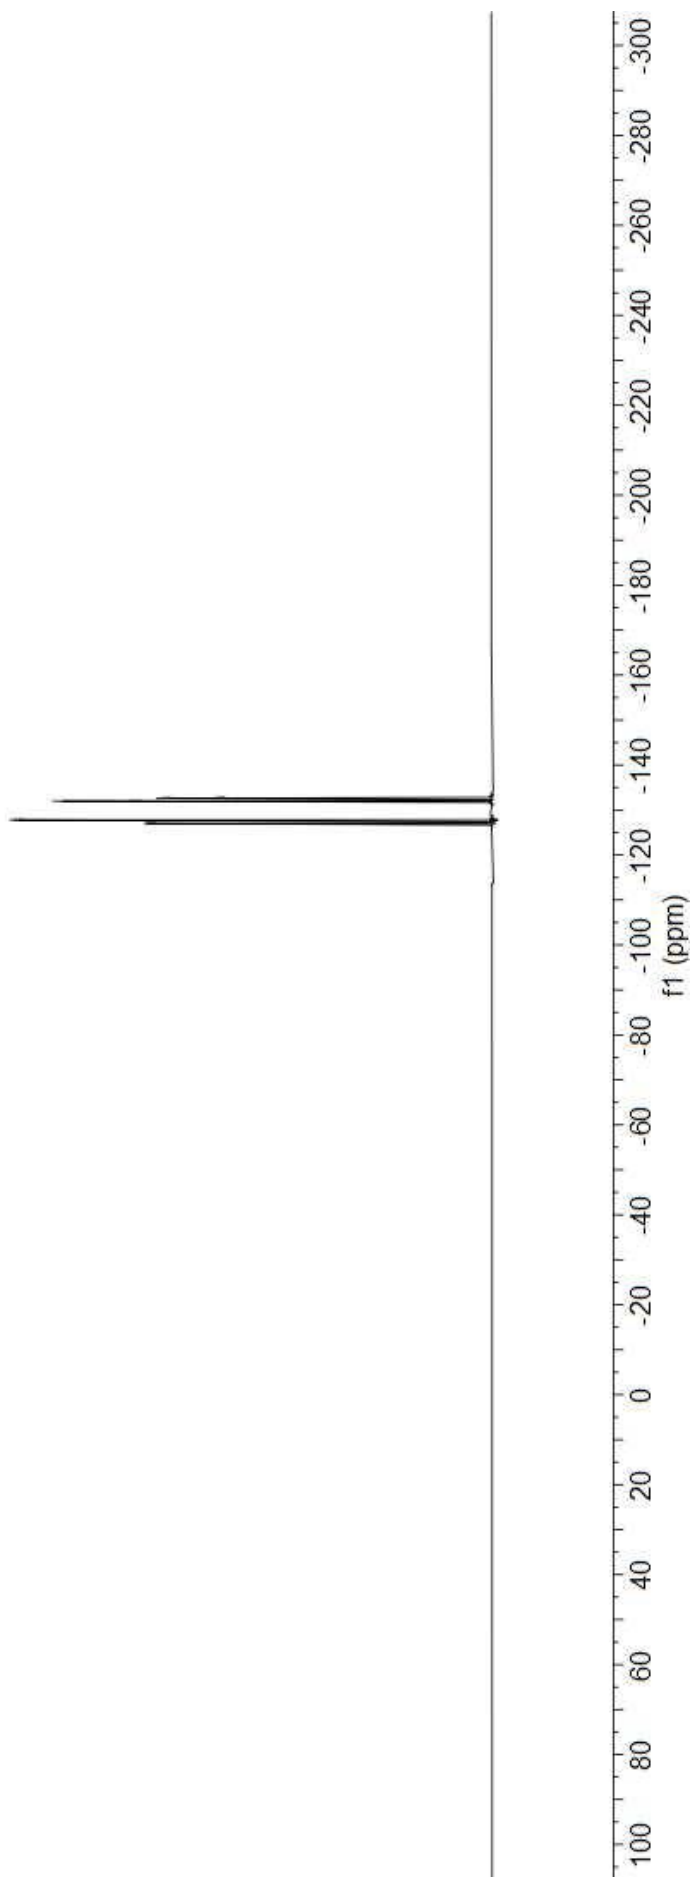

<sup>1</sup>H NMR of **14g-b** (CDCl<sub>3</sub>, 400 MHz, 25 °C)

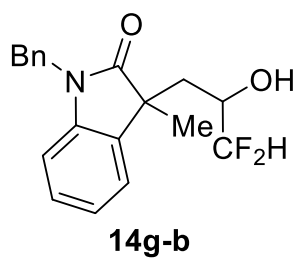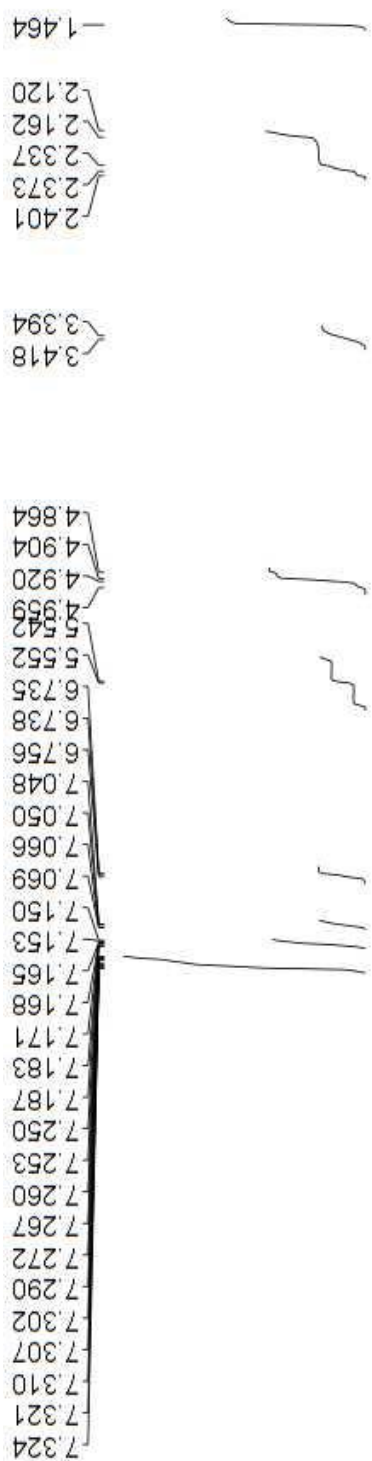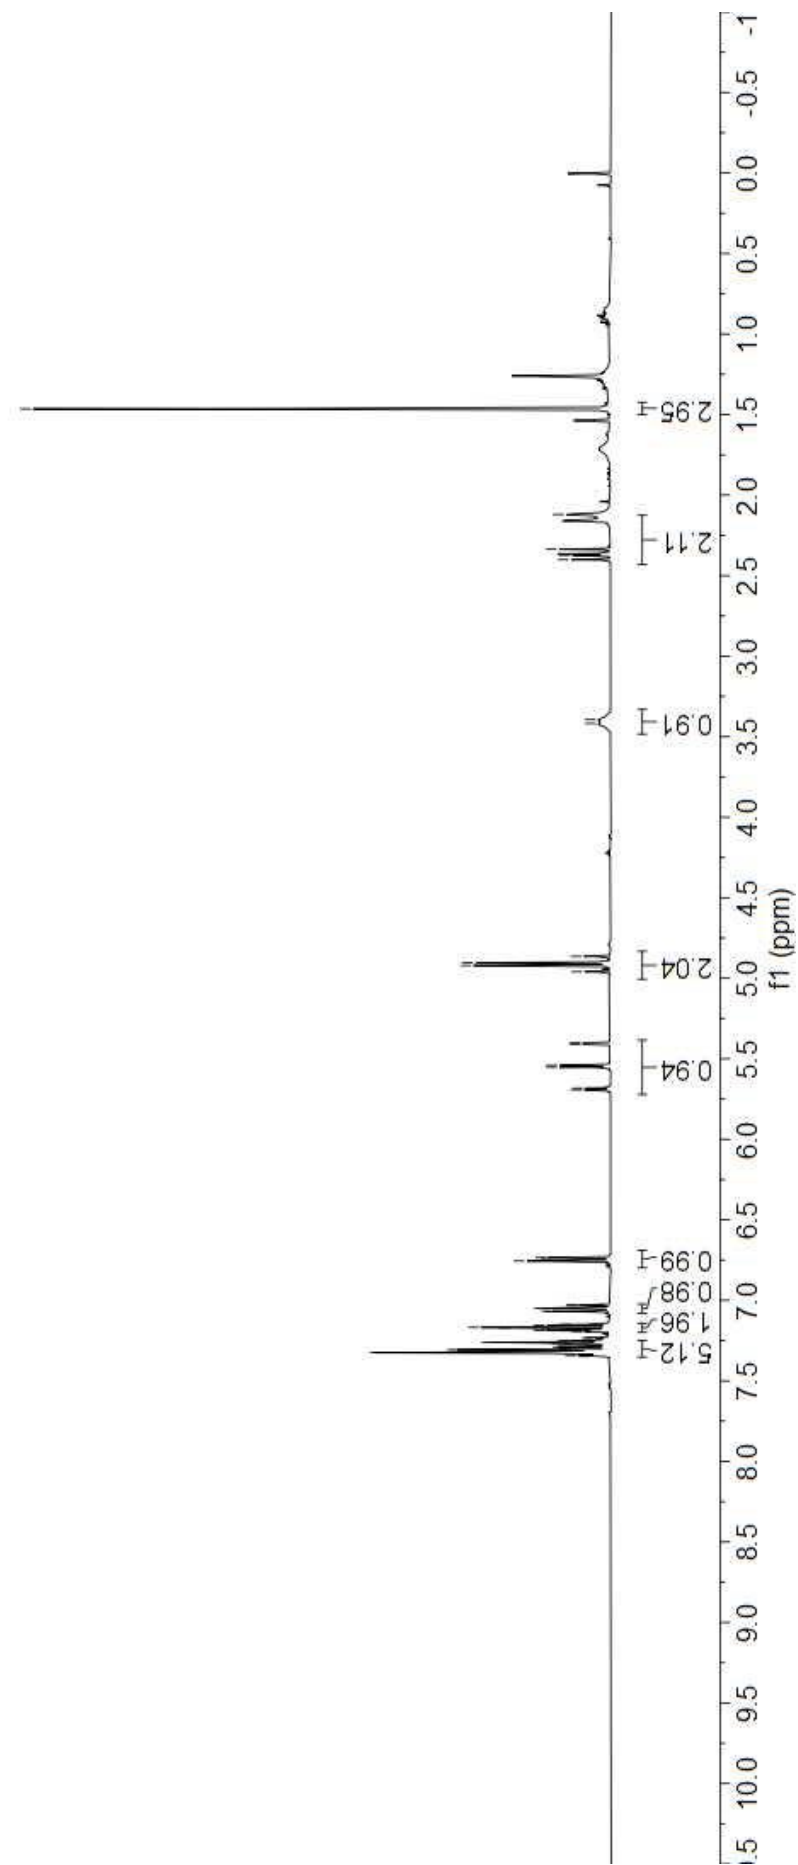

$^{13}\text{C}$  NMR of **14g-b** ( $\text{CDCl}_3$ , 100 MHz, 25 °C)

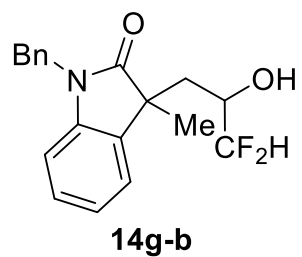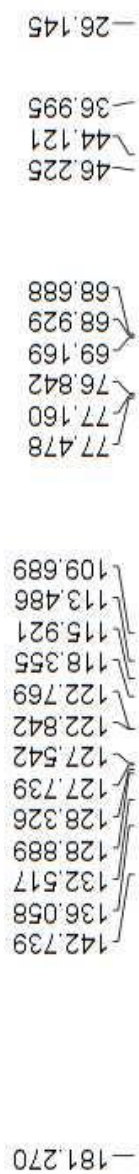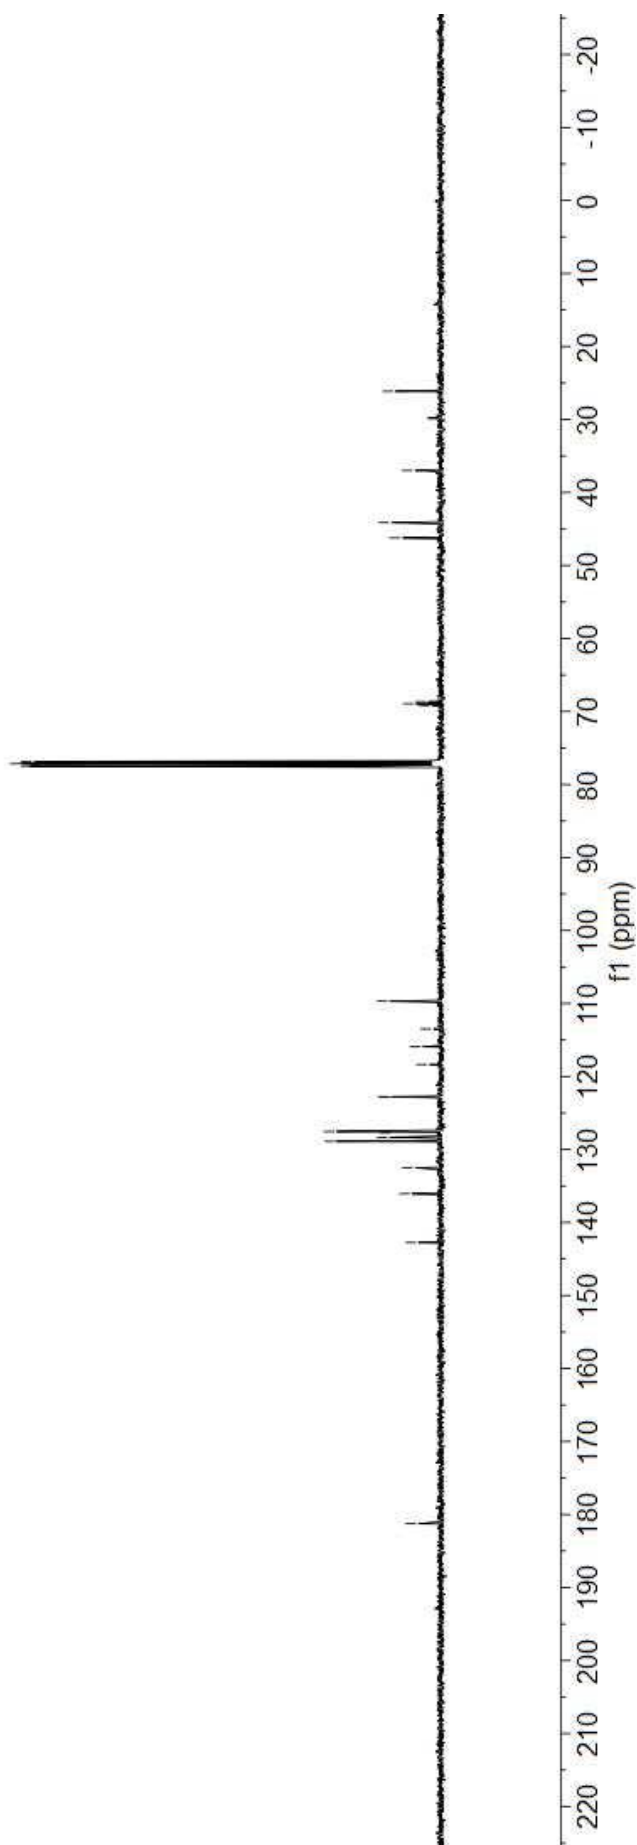



$^{19}\text{F}$  NMR of **14g-b** ( $\text{CDCl}_3$ , 375 MHz, 25  $^\circ\text{C}$ )

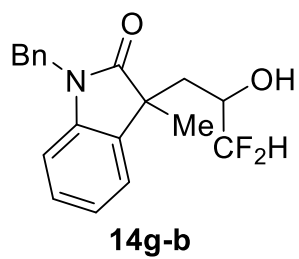

132.040  
132.004  
131.889  
131.856  
131.276  
131.243  
131.125  
131.093  
128.812  
128.788  
128.665  
128.639  
128.051  
128.007  
127.901  
127.877

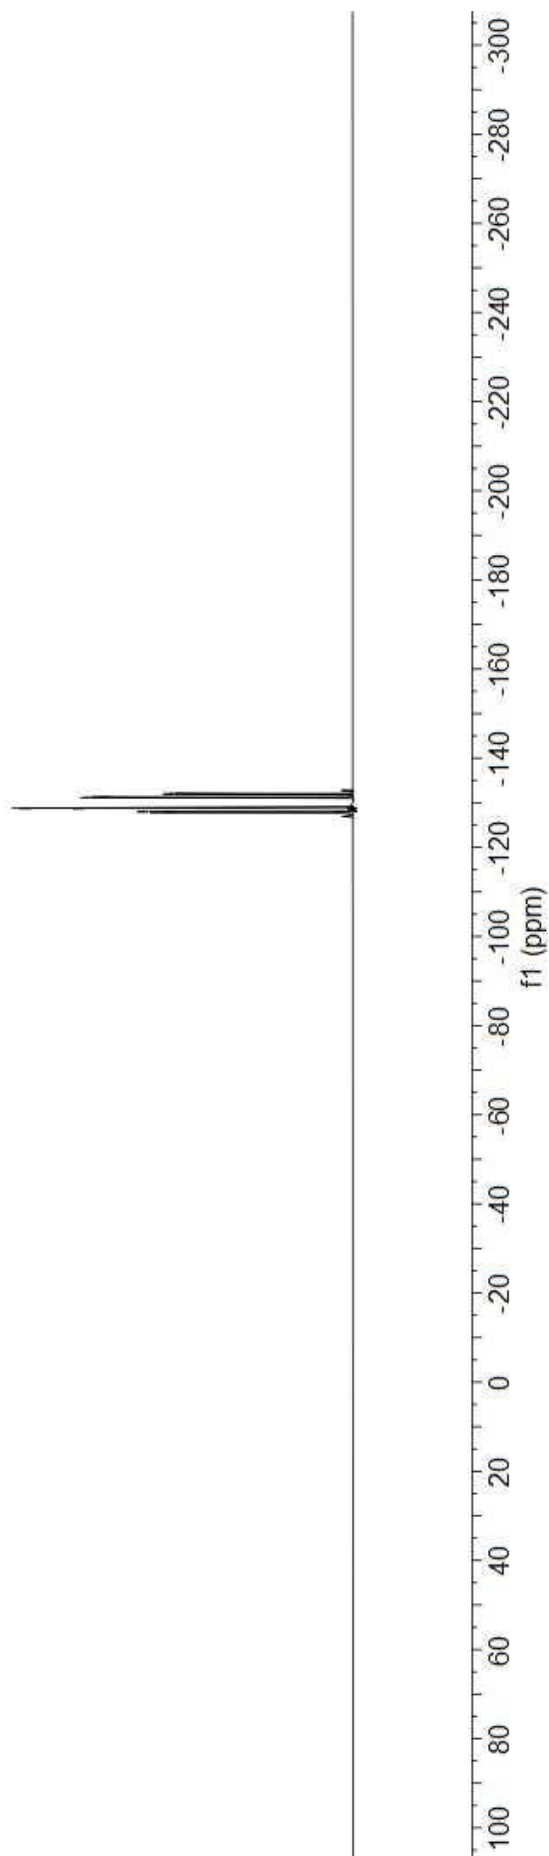

<sup>1</sup>H NMR of **14h-a** (CDCl<sub>3</sub>, 400 MHz, 25 °C)

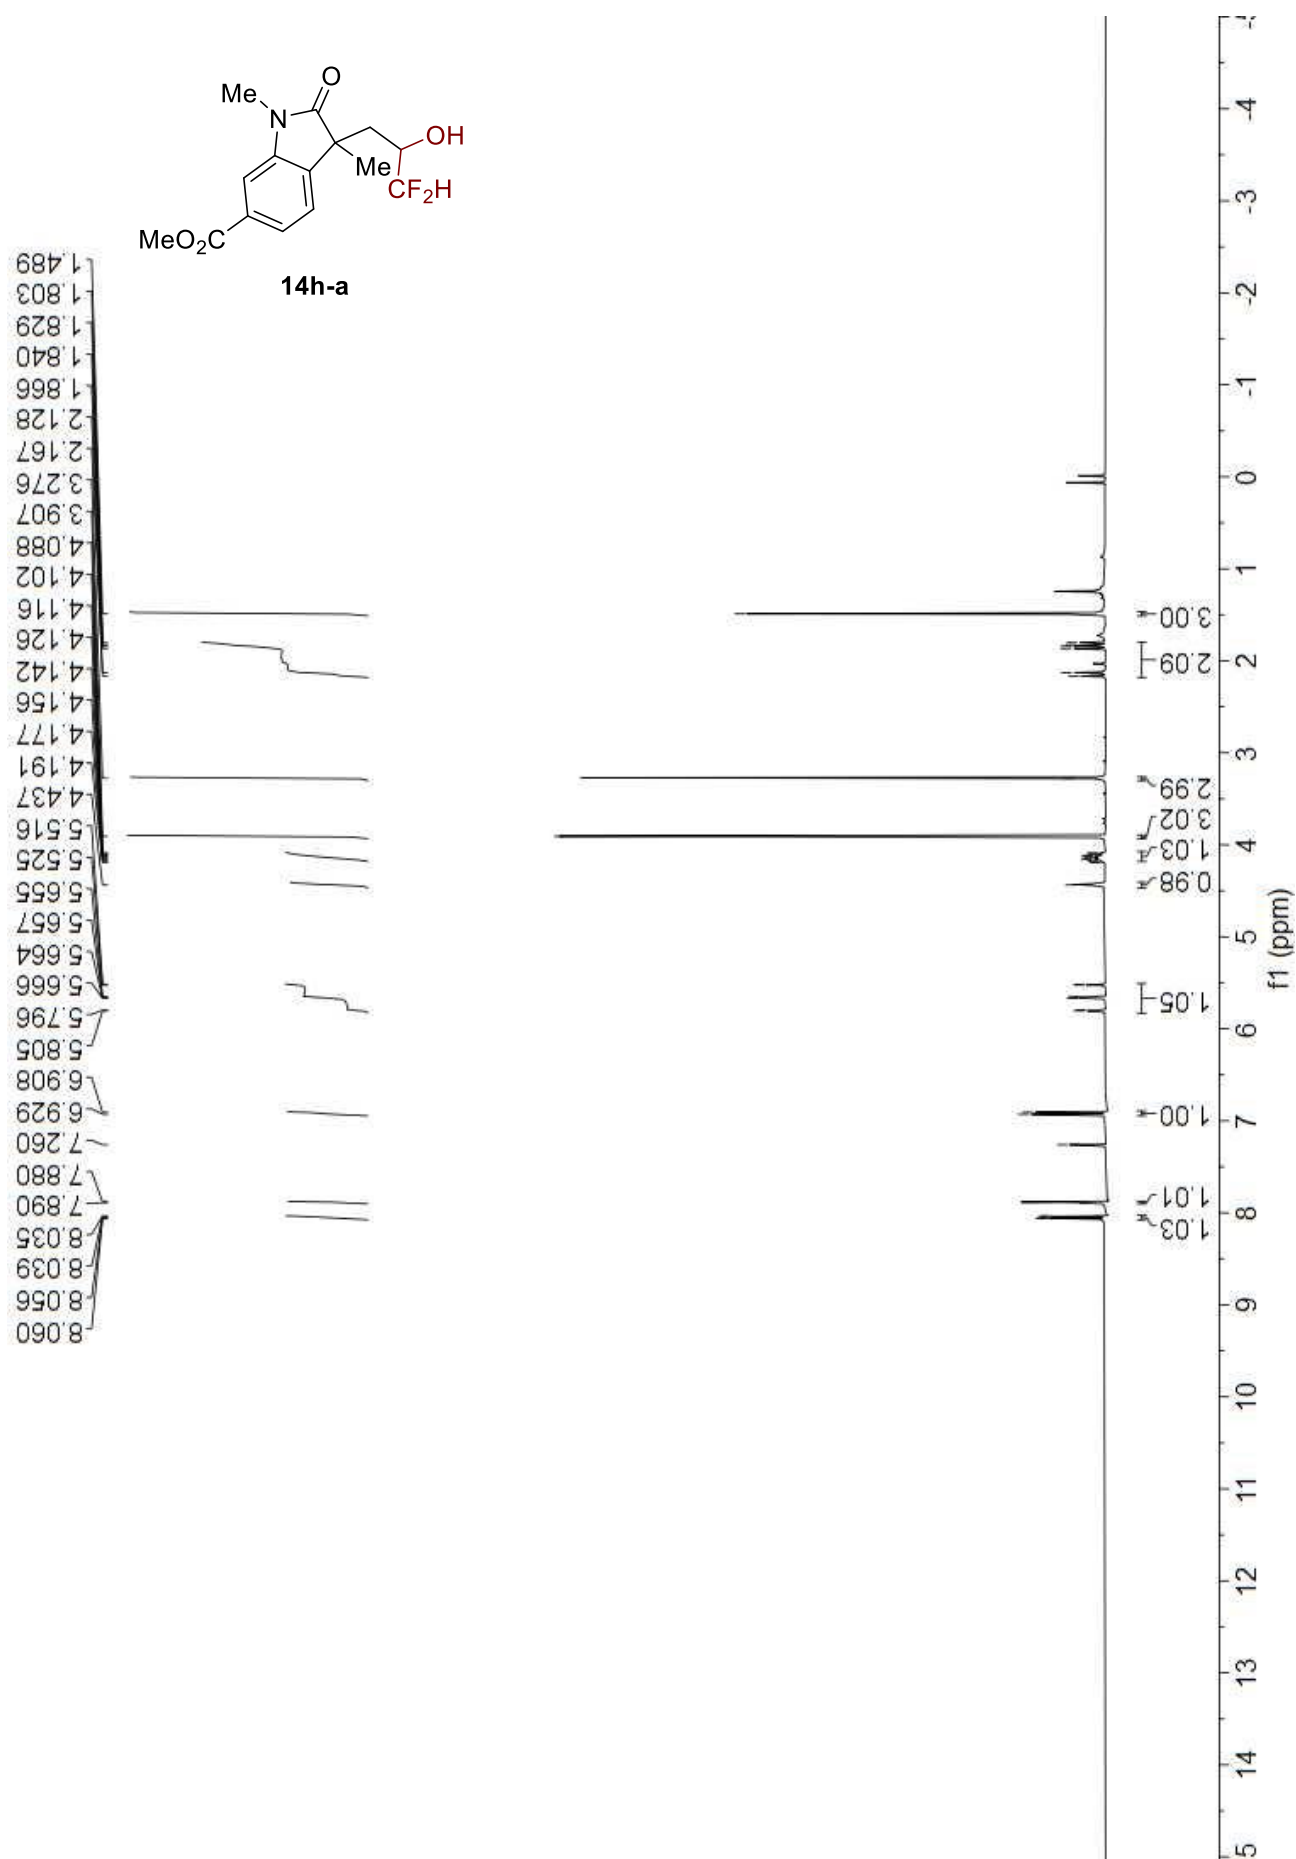

$^{13}\text{C}$  NMR of **14h-a** ( $\text{CDCl}_3$ , 100 MHz, 25 °C)

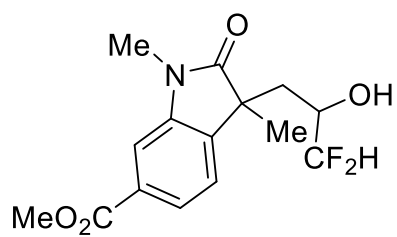

**14h-a**

22.601  
26.857  
35.982  
46.497  
52.279  
68.323  
68.566  
68.807  
76.842  
77.161  
77.479

108.373  
113.592  
116.026  
118.451  
123.937  
125.482  
131.156  
134.794

146.447

166.765

182.416

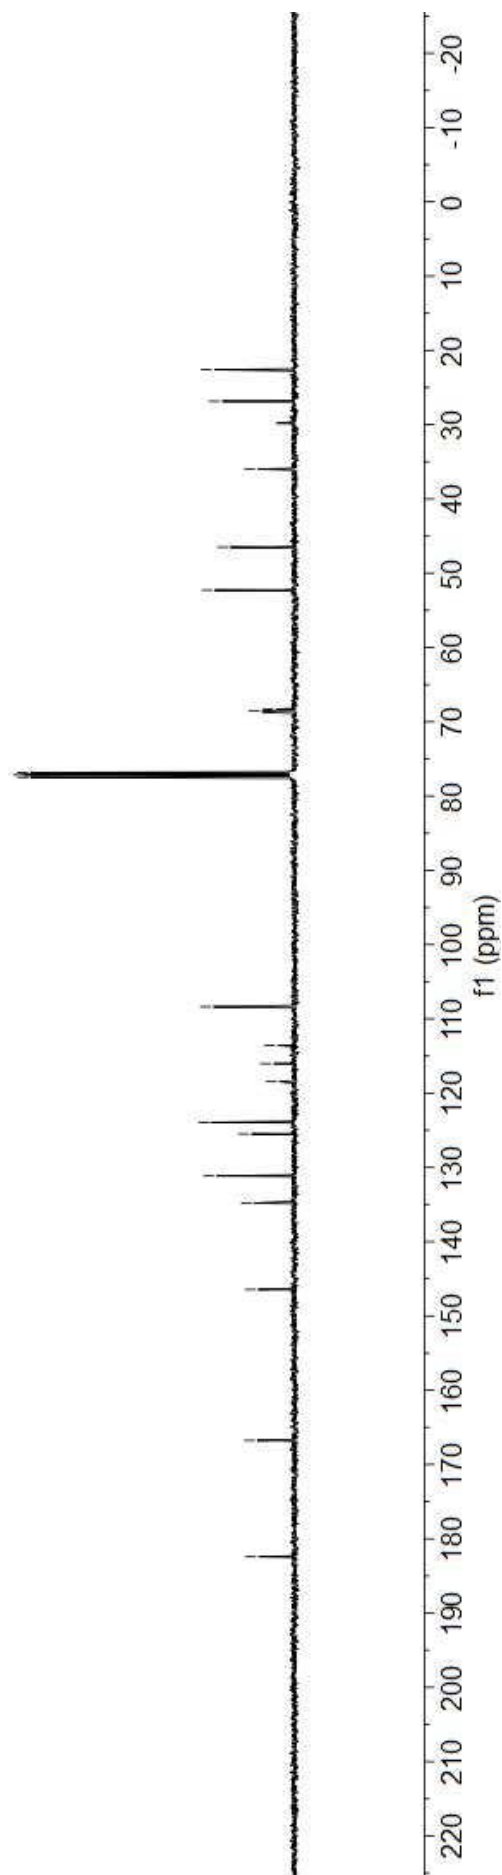

$^{19}\text{F}$  NMR of **14h-a** ( $\text{CDCl}_3$ , 375 MHz, 25 °C)

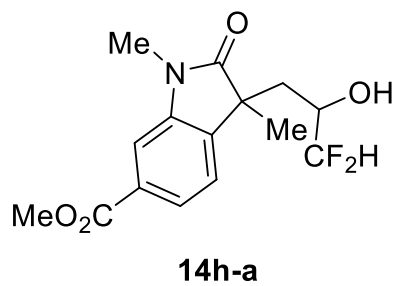

132.786  
132.757  
132.632  
132.606  
132.036  
131.999  
131.885  
131.849  
127.972  
127.945  
127.826  
127.802  
127.215  
127.192  
127.069  
127.045

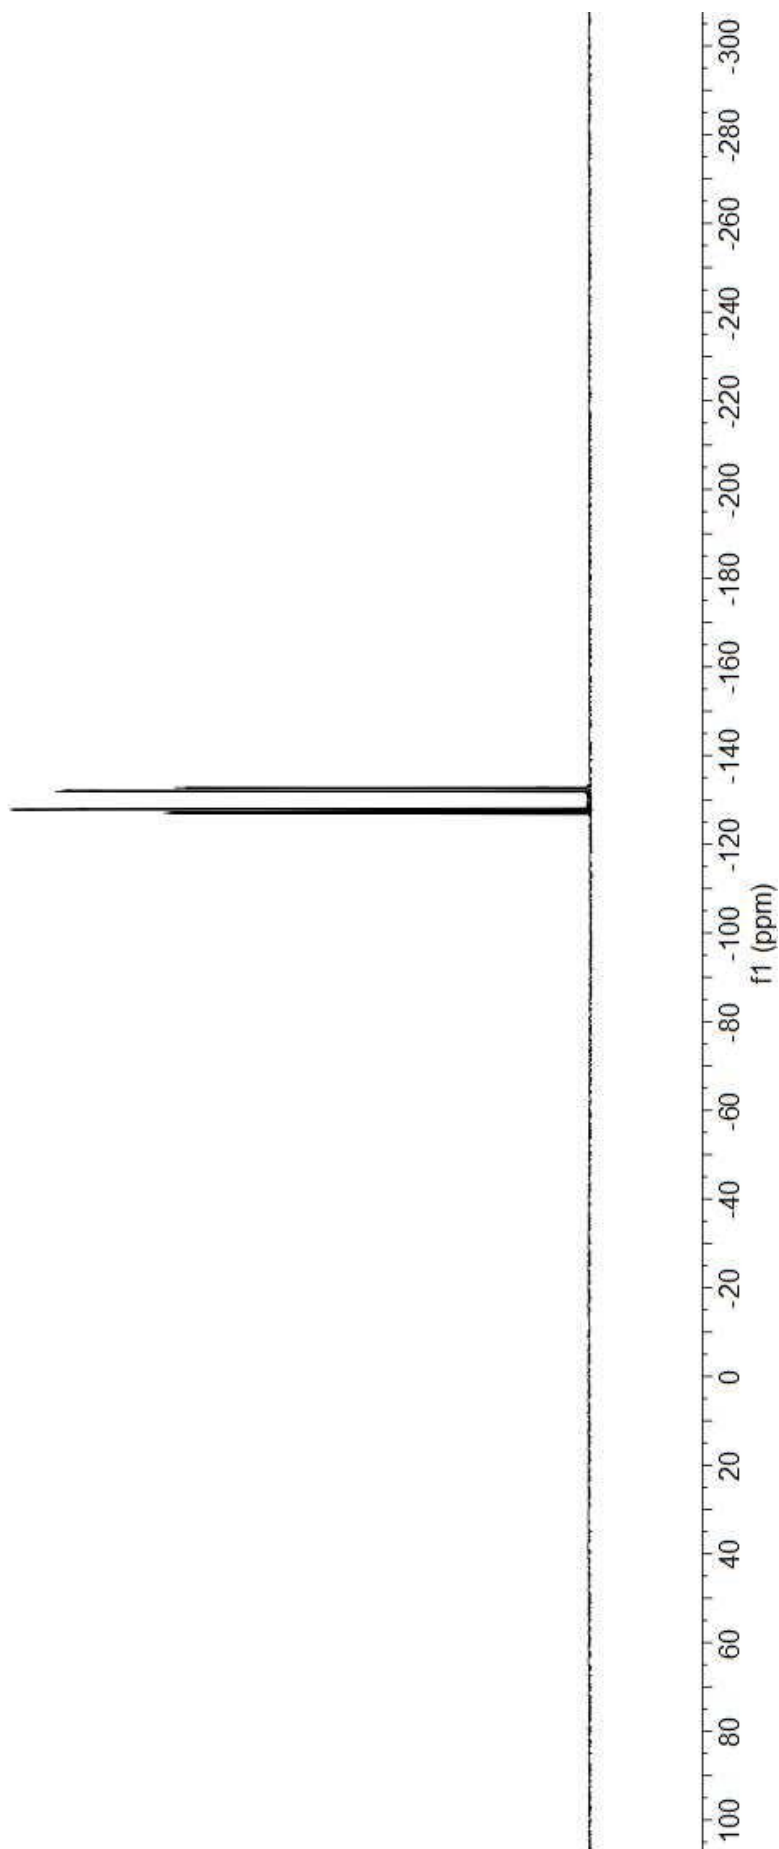

<sup>1</sup>H NMR of **14h-b** (CDCl<sub>3</sub>, 400 MHz, 25 °C)

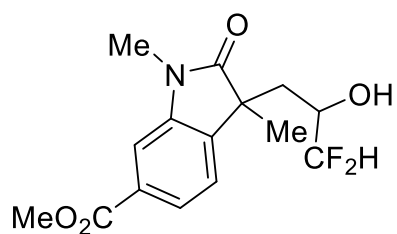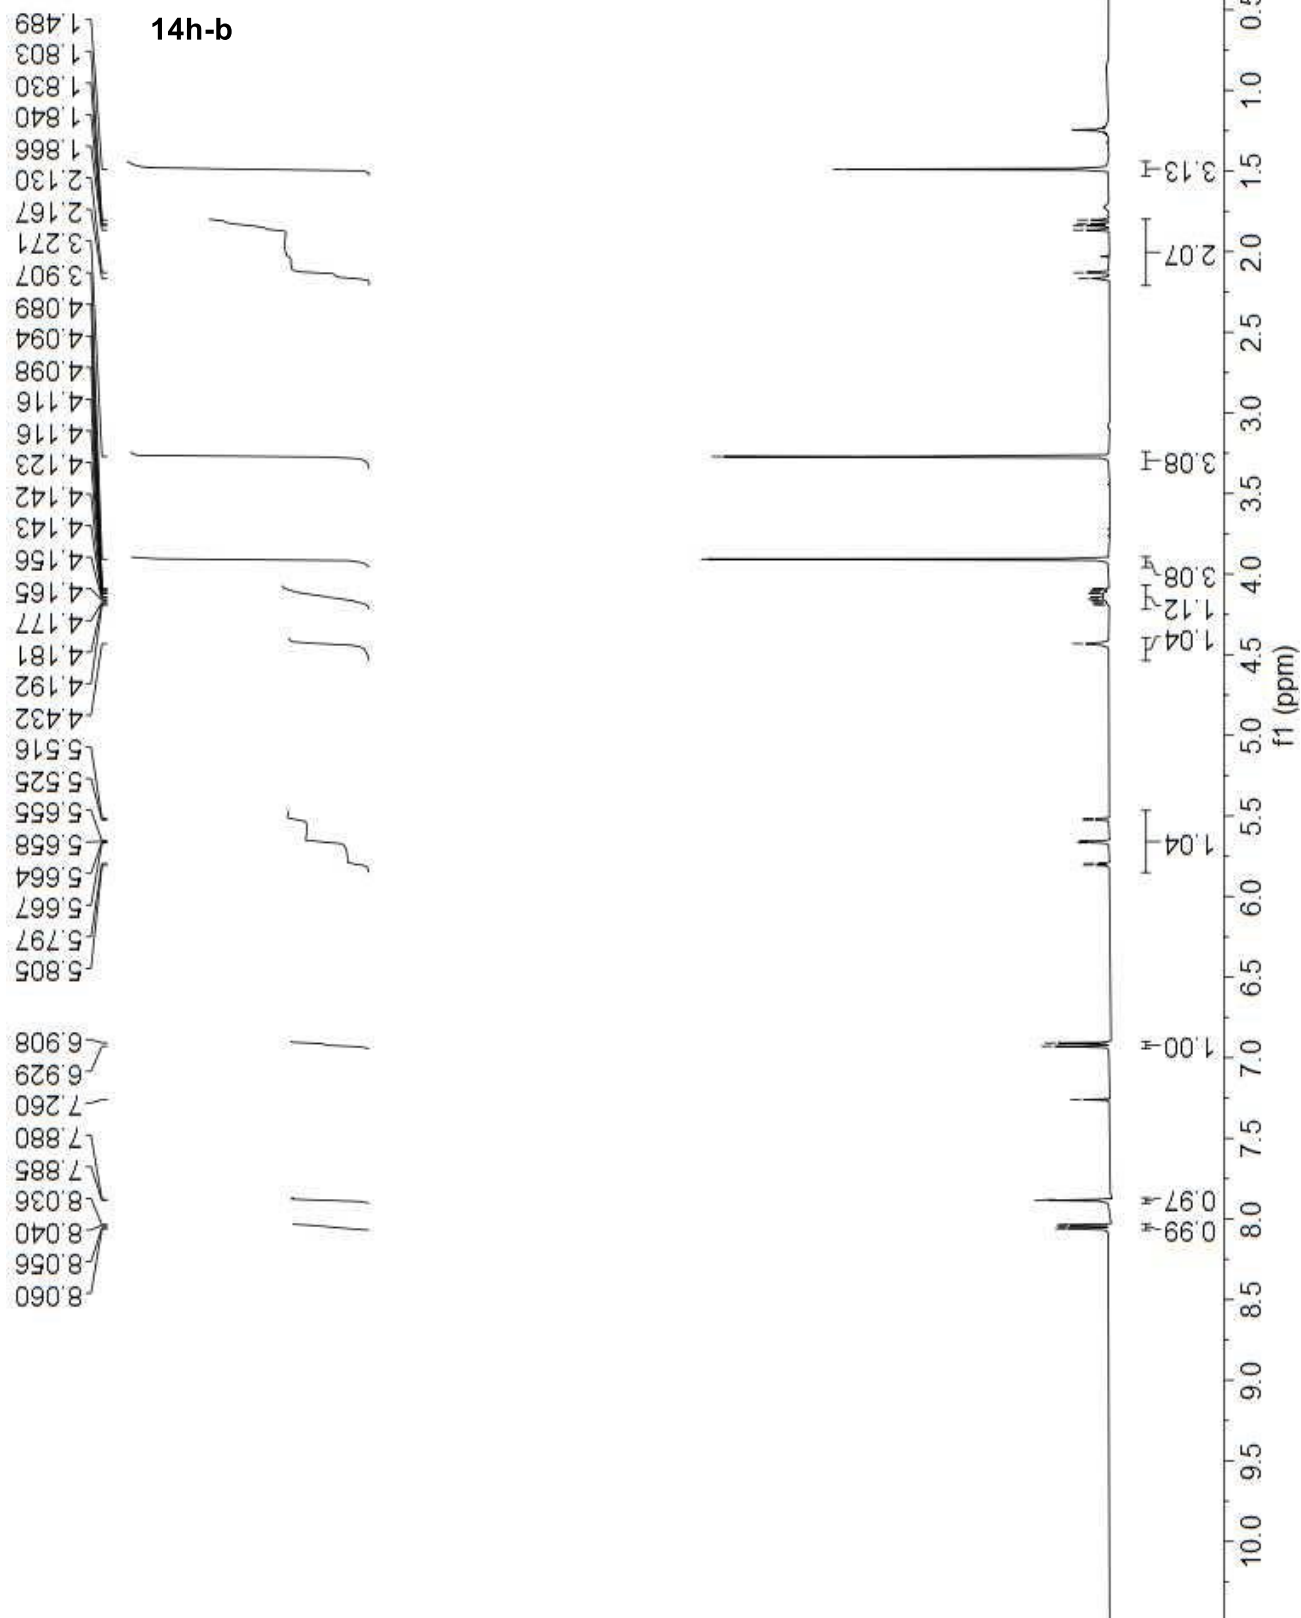

$^{13}\text{C}$  NMR of **14h-b** ( $\text{CDCl}_3$ , 100 MHz, 25 °C)

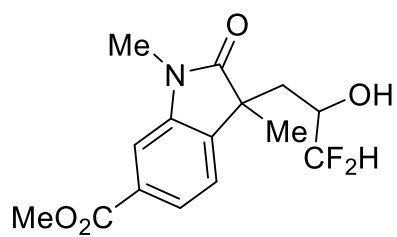

**14h-b**

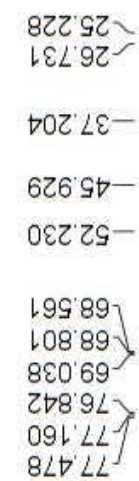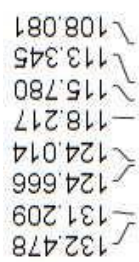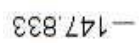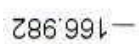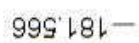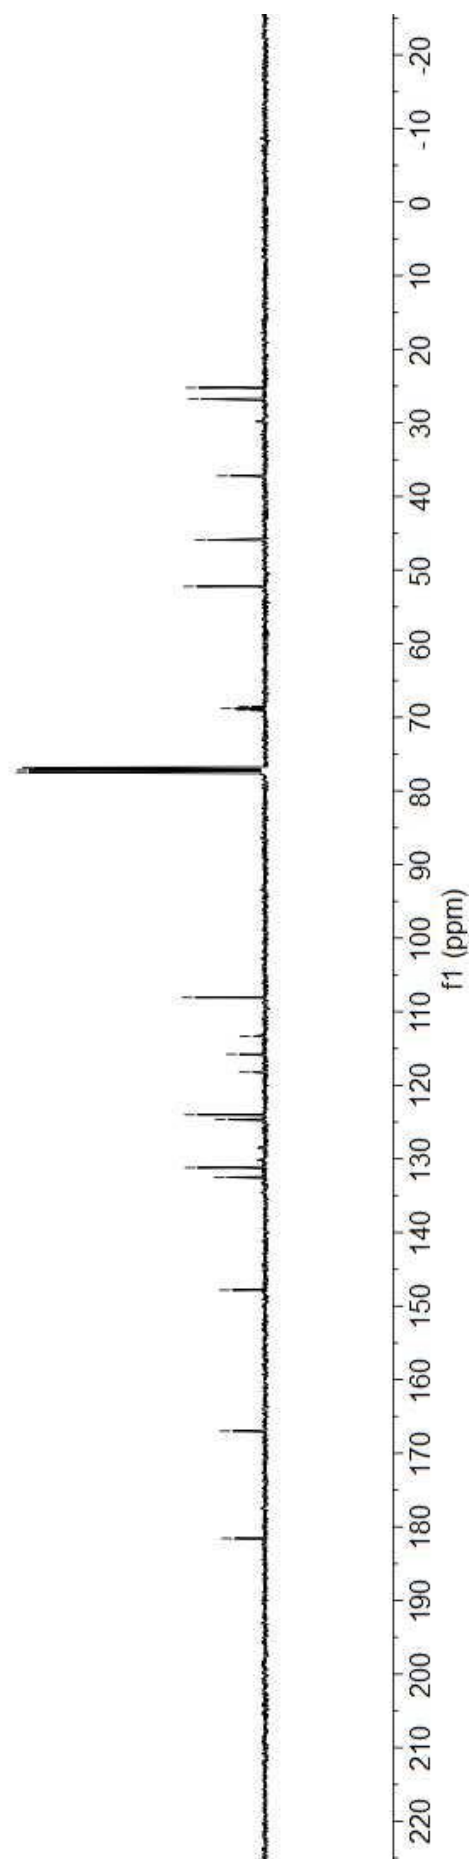

$^{19}\text{F}$  NMR of **14h-b** ( $\text{CDCl}_3$ , 375 MHz, 25  $^\circ\text{C}$ )

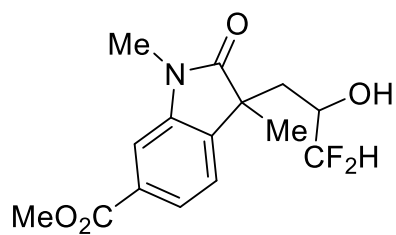

**14h-b**

-131.394  
-131.362  
-131.244  
-131.212  
-130.630  
-130.598  
-130.479  
-130.449  
-129.109  
-129.081  
-128.968  
-128.934  
-128.392  
-128.320  
-128.198  
-128.170

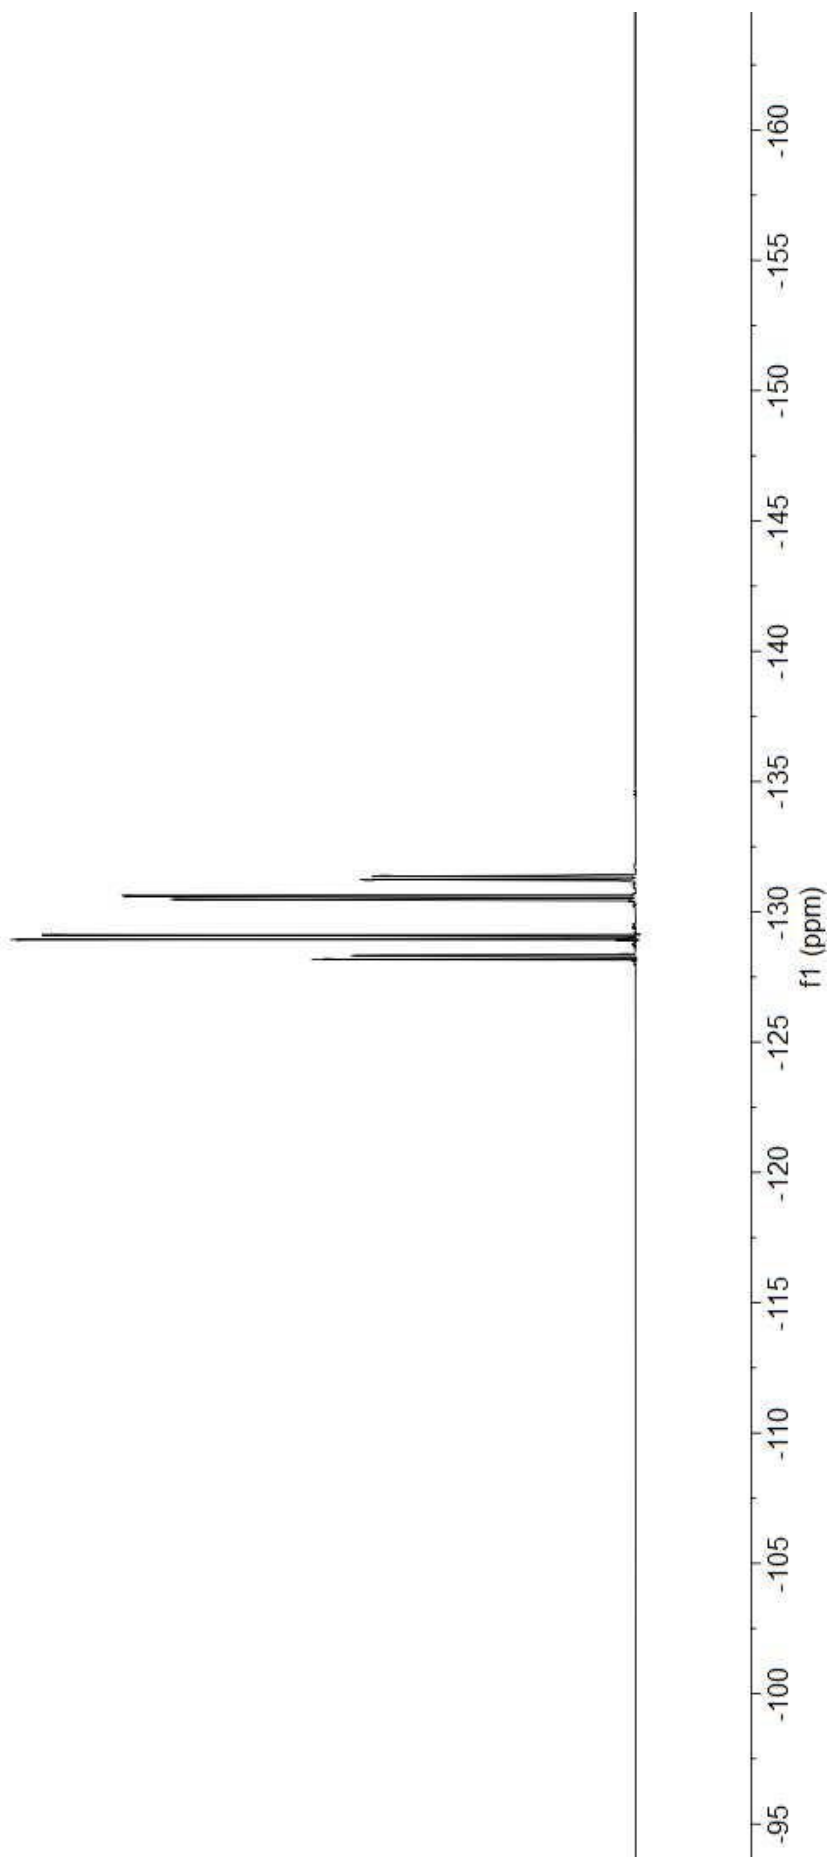

<sup>1</sup>H NMR of **14i-a** (CDCl<sub>3</sub>, 400 MHz, 25 °C)

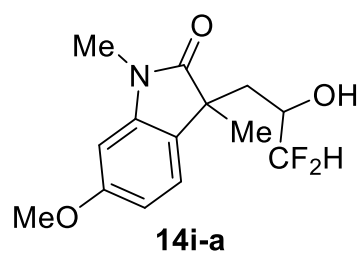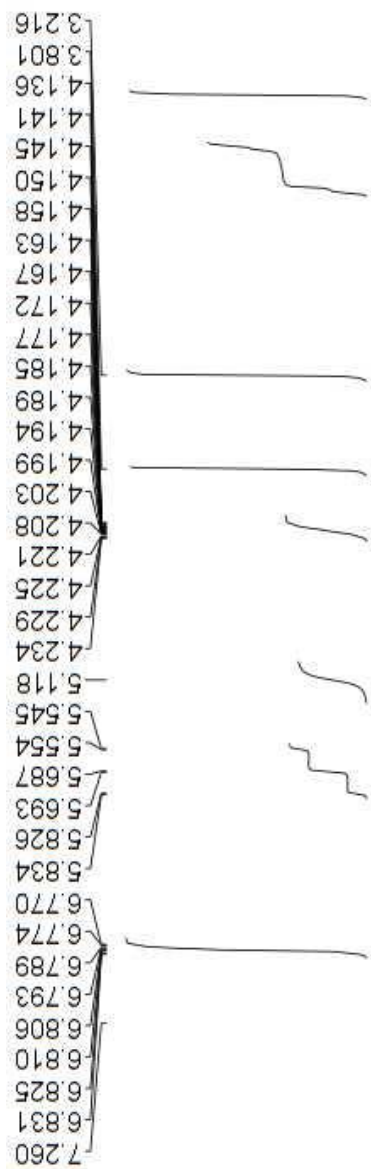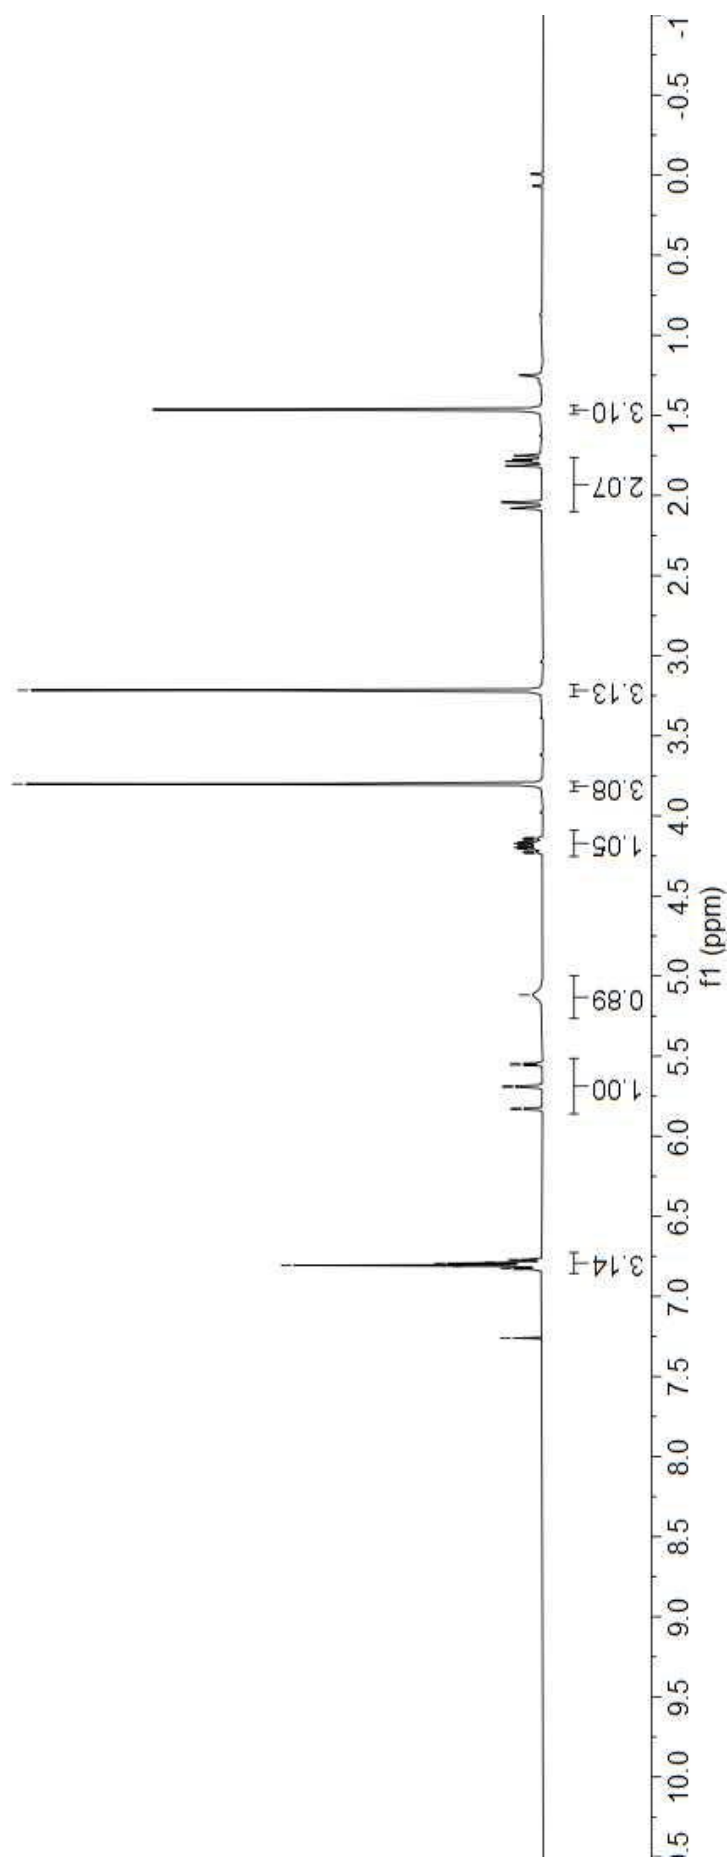



$^{13}\text{C}$  NMR of **14i-a** ( $\text{CDCl}_3$ , 100 MHz, 25 °C)

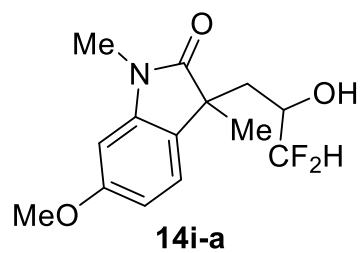

181.870  
156.844  
136.200  
135.647  
118.666  
116.242  
116.233  
113.811  
112.577  
110.141  
109.229  
77.478  
77.160  
76.842  
68.772  
68.528  
68.288  
55.954  
47.113  
35.882  
26.743  
22.311

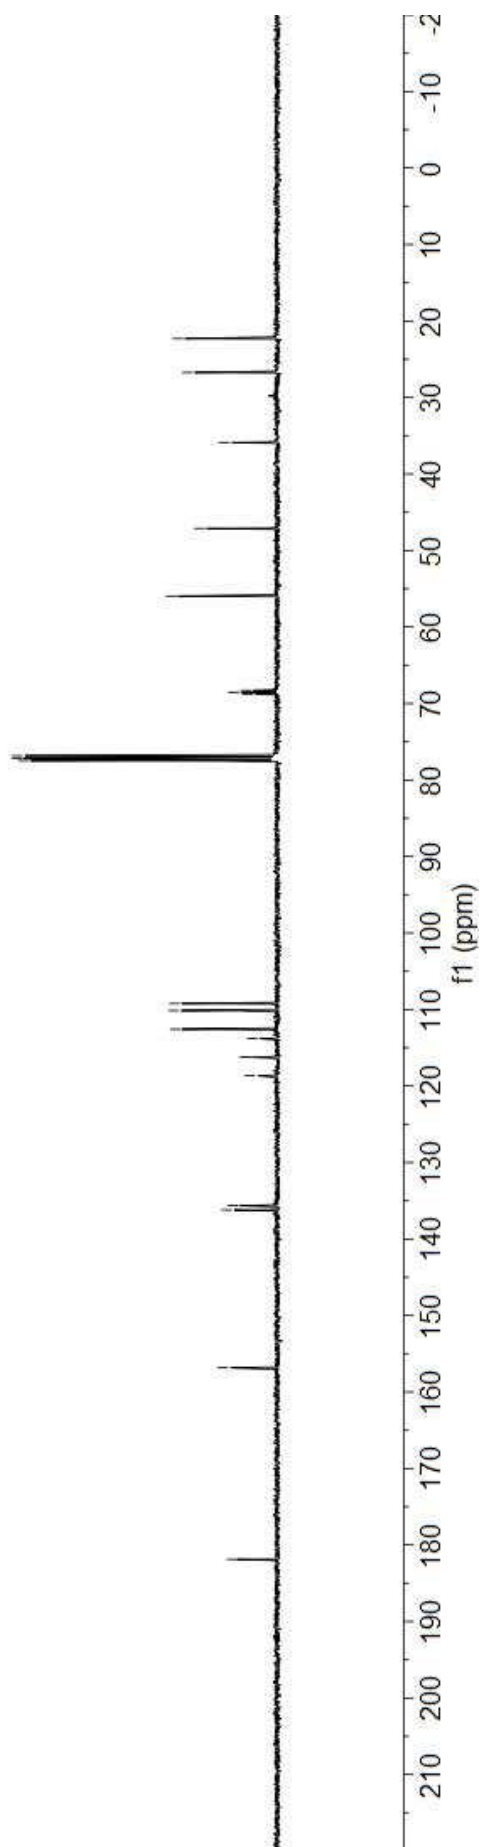

$^{19}\text{F}$  NMR of **14i-a** ( $\text{CDCl}_3$ , 375 MHz, 25 °C)

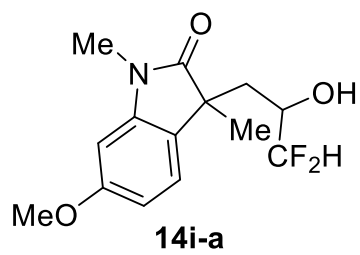

132.922  
132.884  
132.772  
132.733  
132.166  
132.128  
132.016  
131.978  
127.673  
127.663  
127.650  
127.640  
127.535  
127.525  
127.513  
127.502  
126.917  
126.906  
126.894  
126.884  
126.770  
126.761  
126.747  
126.737

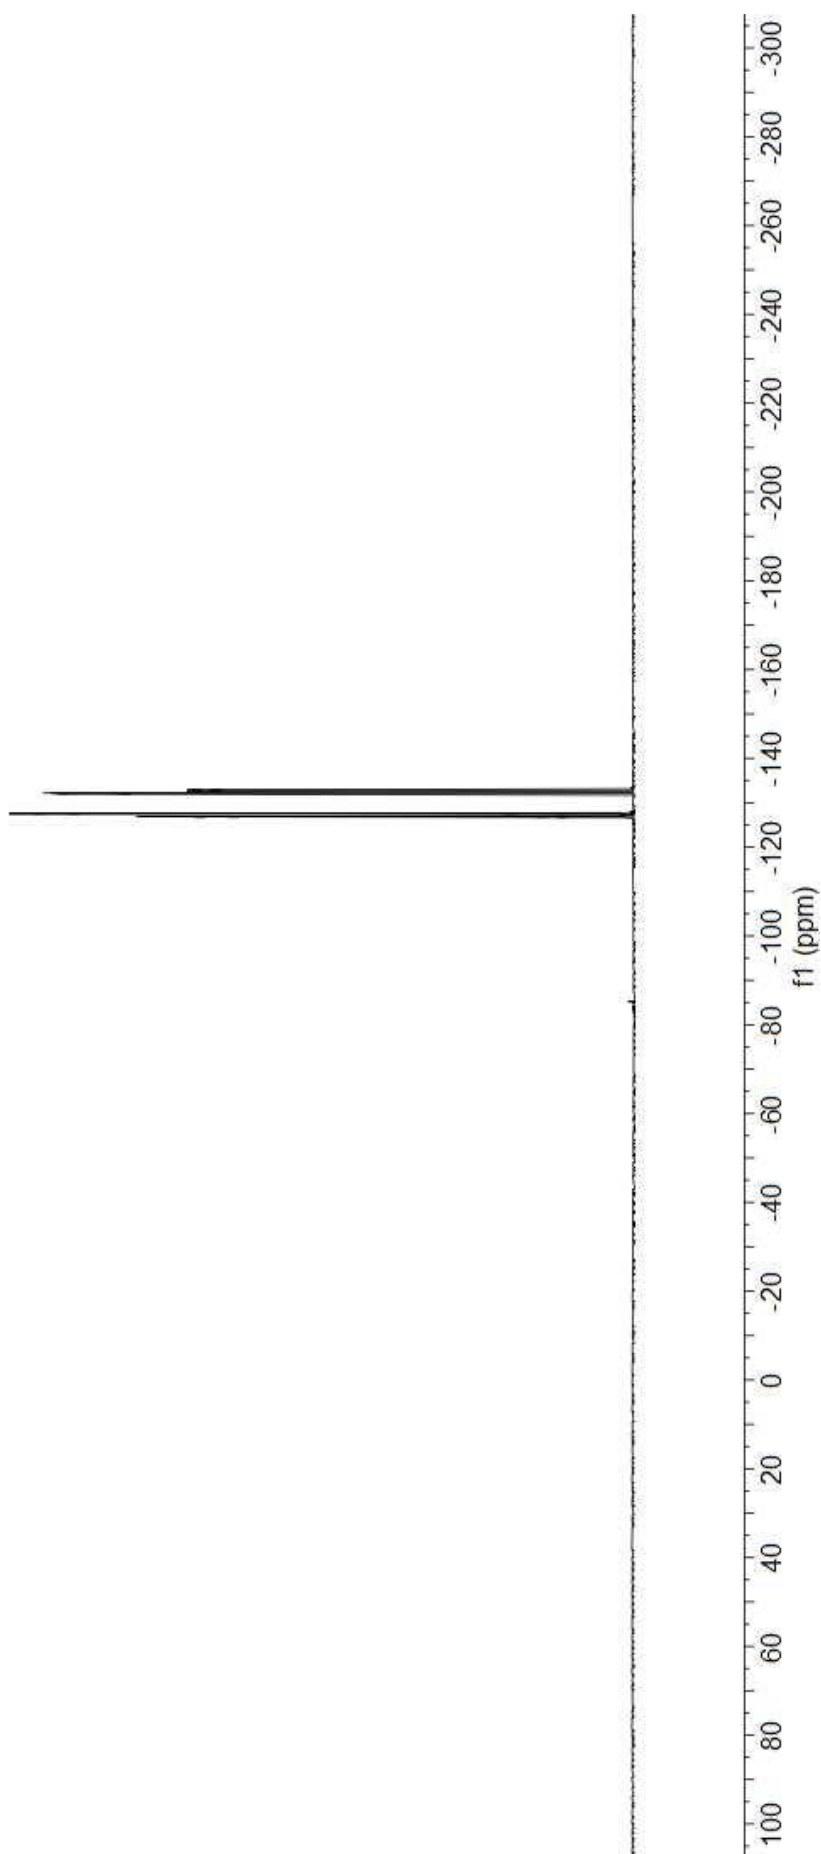

<sup>1</sup>H NMR of **14i-b** (CDCl<sub>3</sub>, 400 MHz, 25 °C)

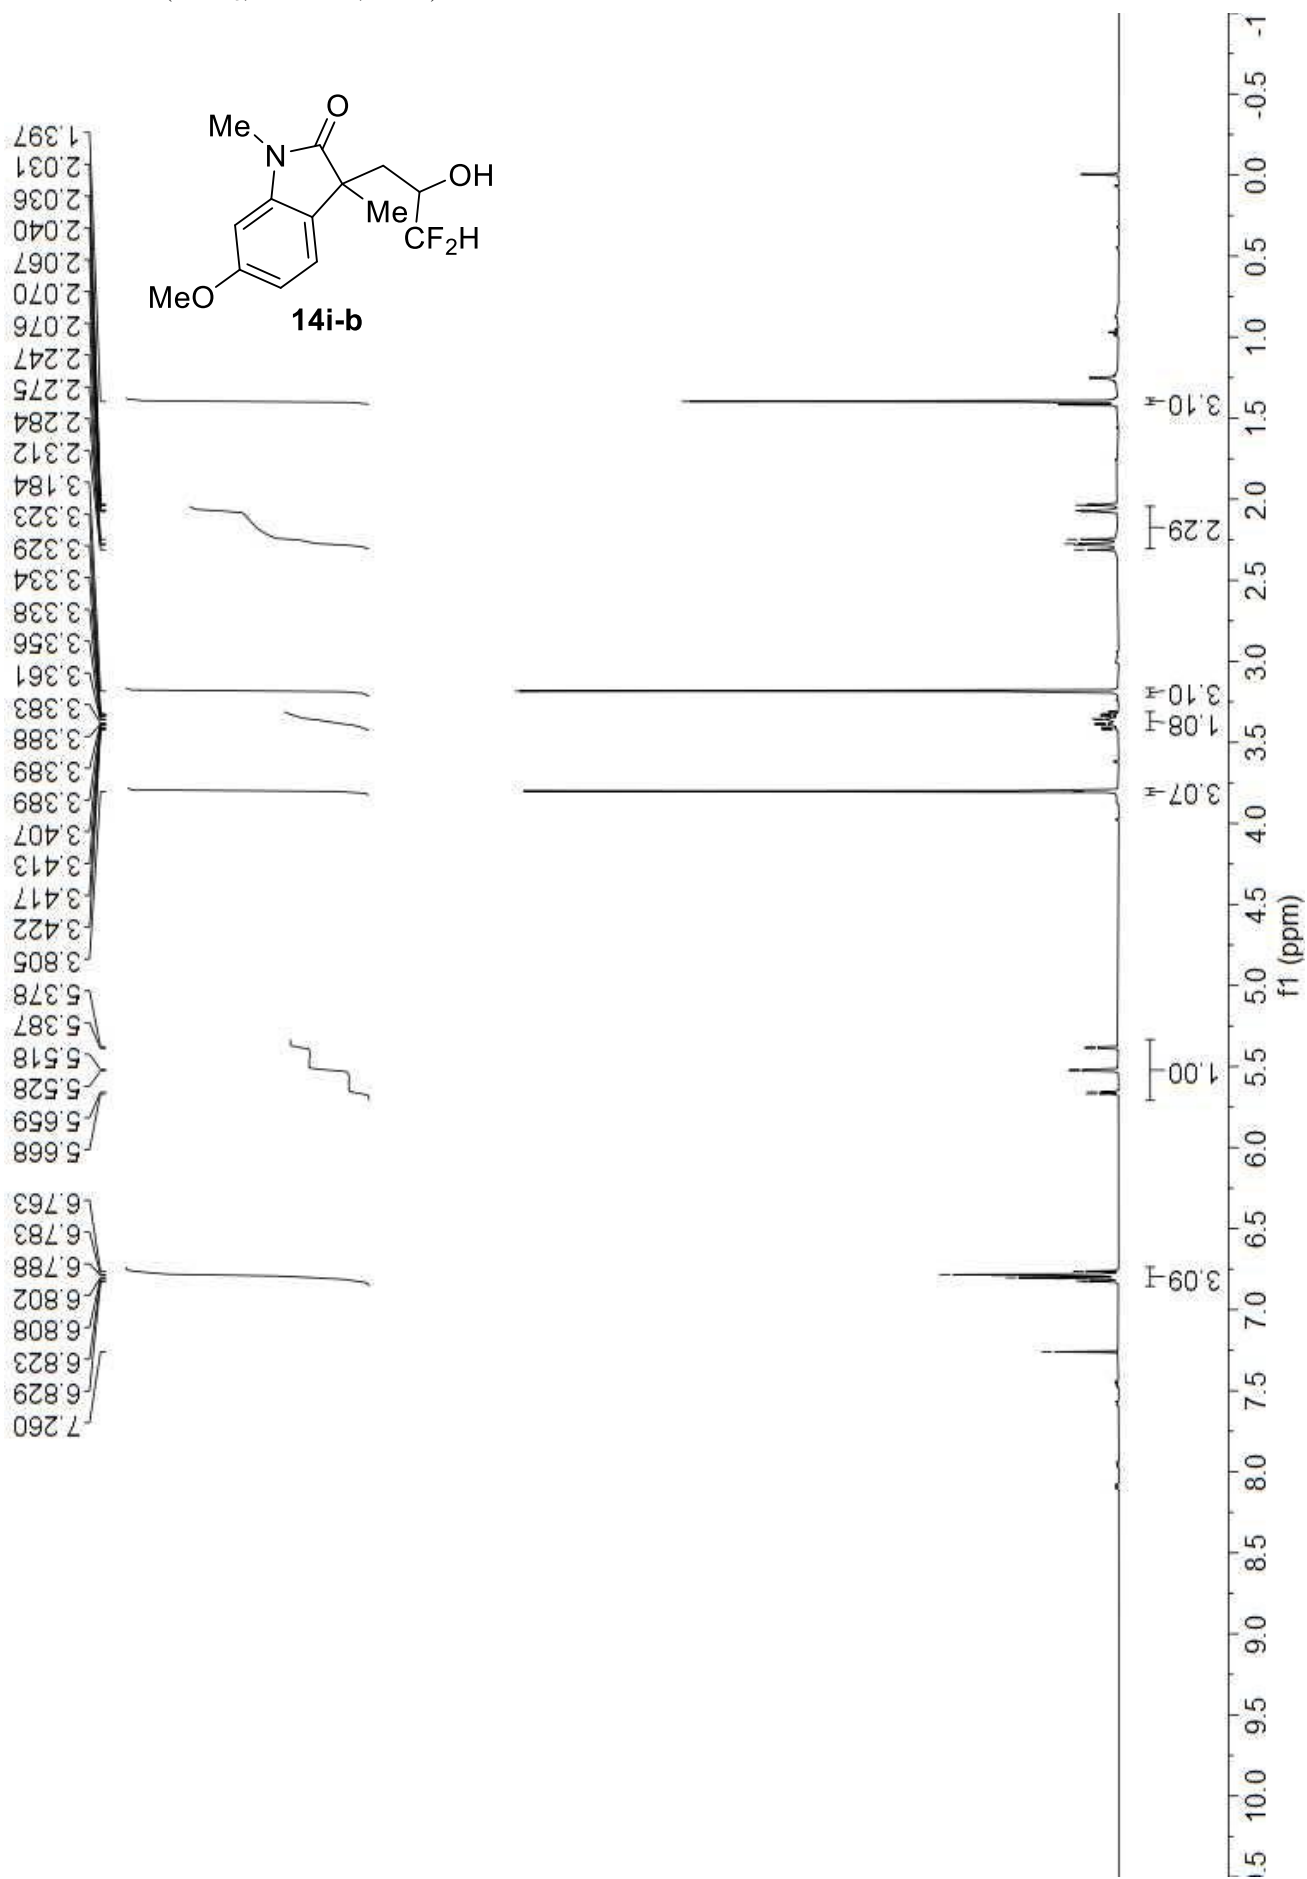

$^{13}\text{C}$  NMR of **14i-b** ( $\text{CDCl}_3$ , 100 MHz, 25 °C)

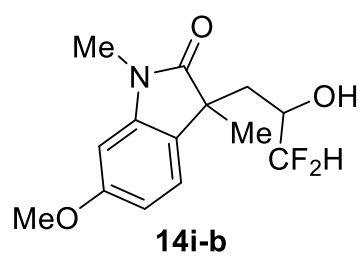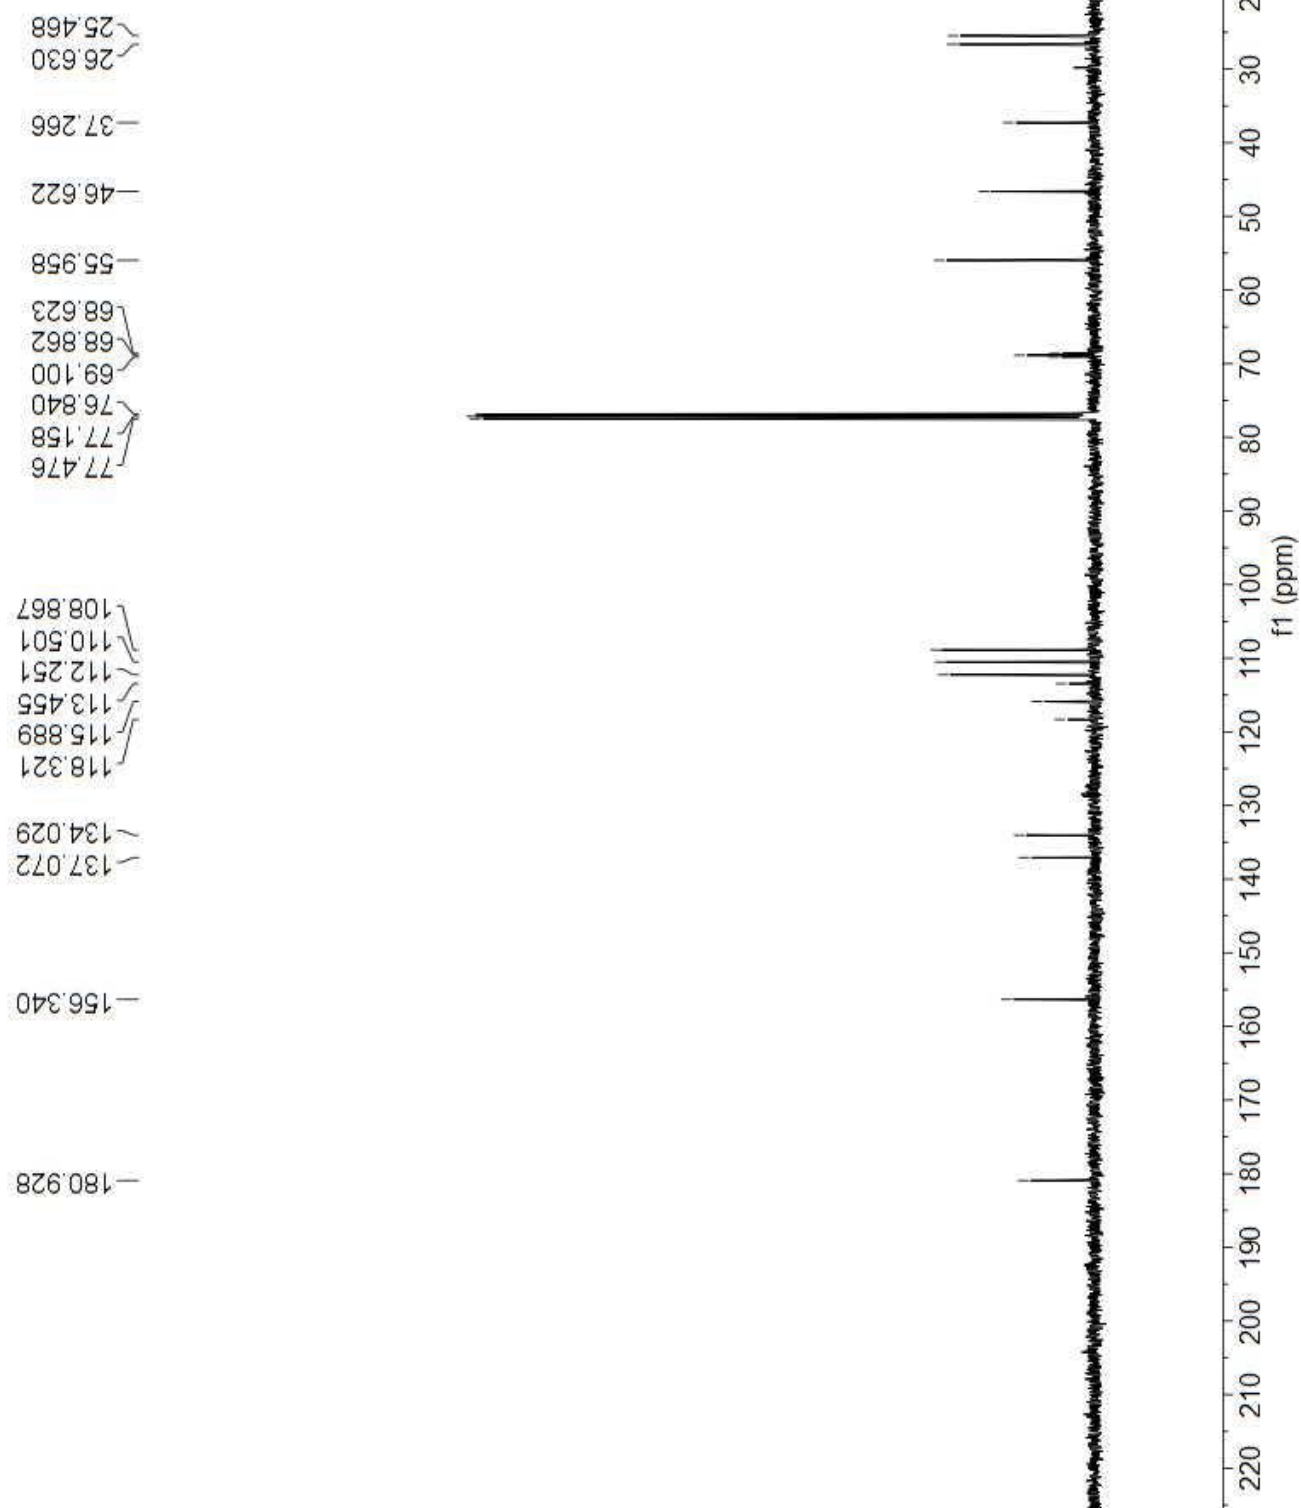

$^{19}\text{F}$  NMR of **14i-b** ( $\text{CDCl}_3$ , 375 MHz, 25  $^\circ\text{C}$ )

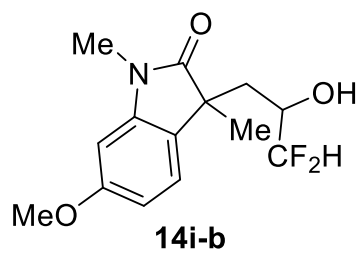

132.021  
131.986  
131.870  
131.836  
131.259  
131.224  
131.109  
131.074  
129.040  
129.019  
128.992  
128.890  
128.882  
128.870  
128.843  
128.832  
128.257  
128.230  
128.218  
128.210  
128.108  
128.081

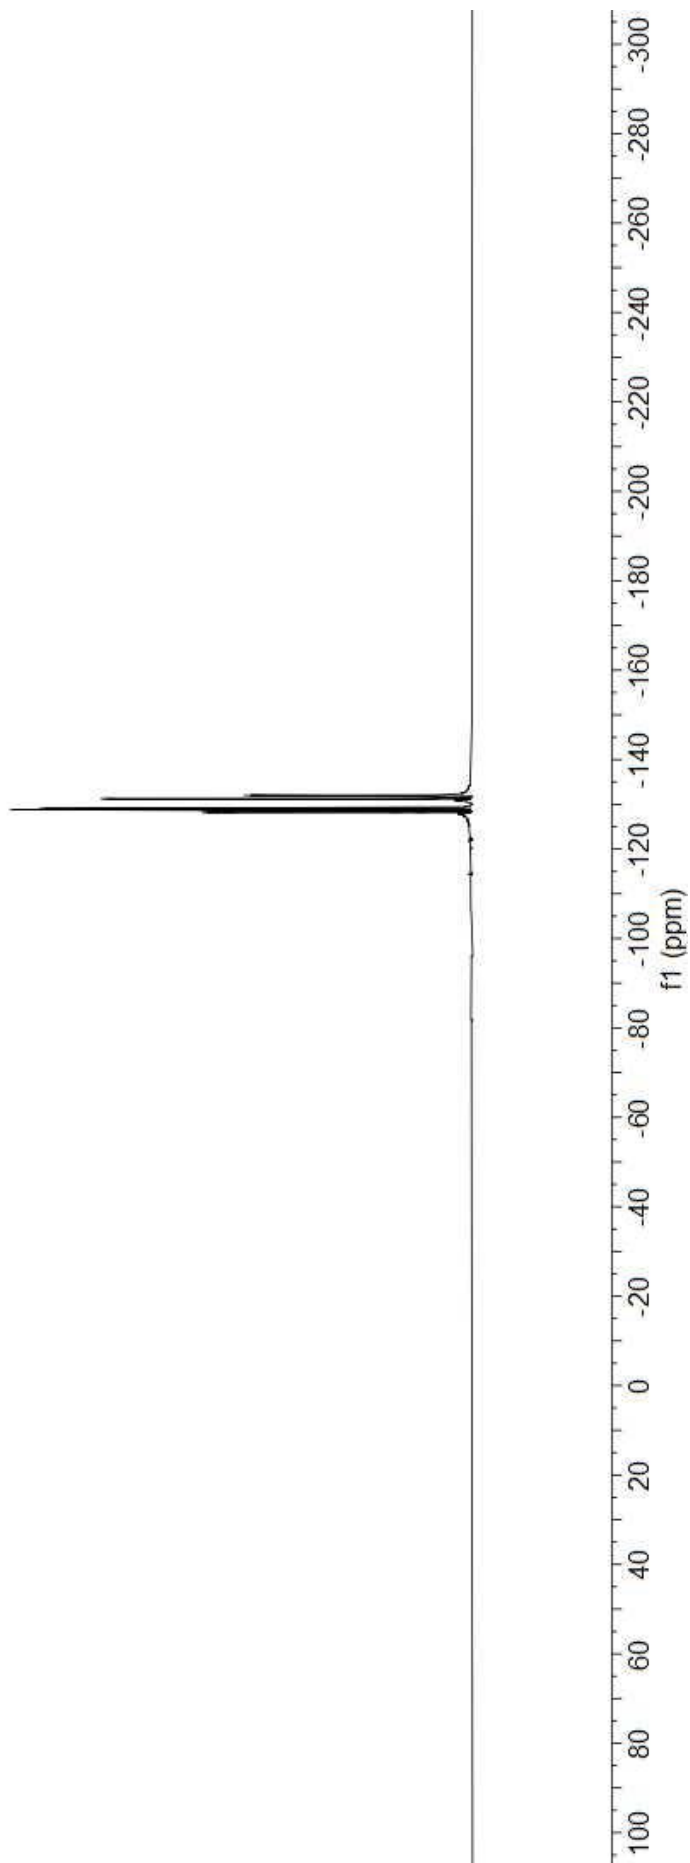

<sup>1</sup>H NMR of **14j** (CDCl<sub>3</sub>, 400 MHz, 25 °C)

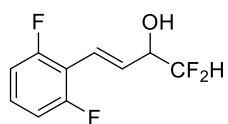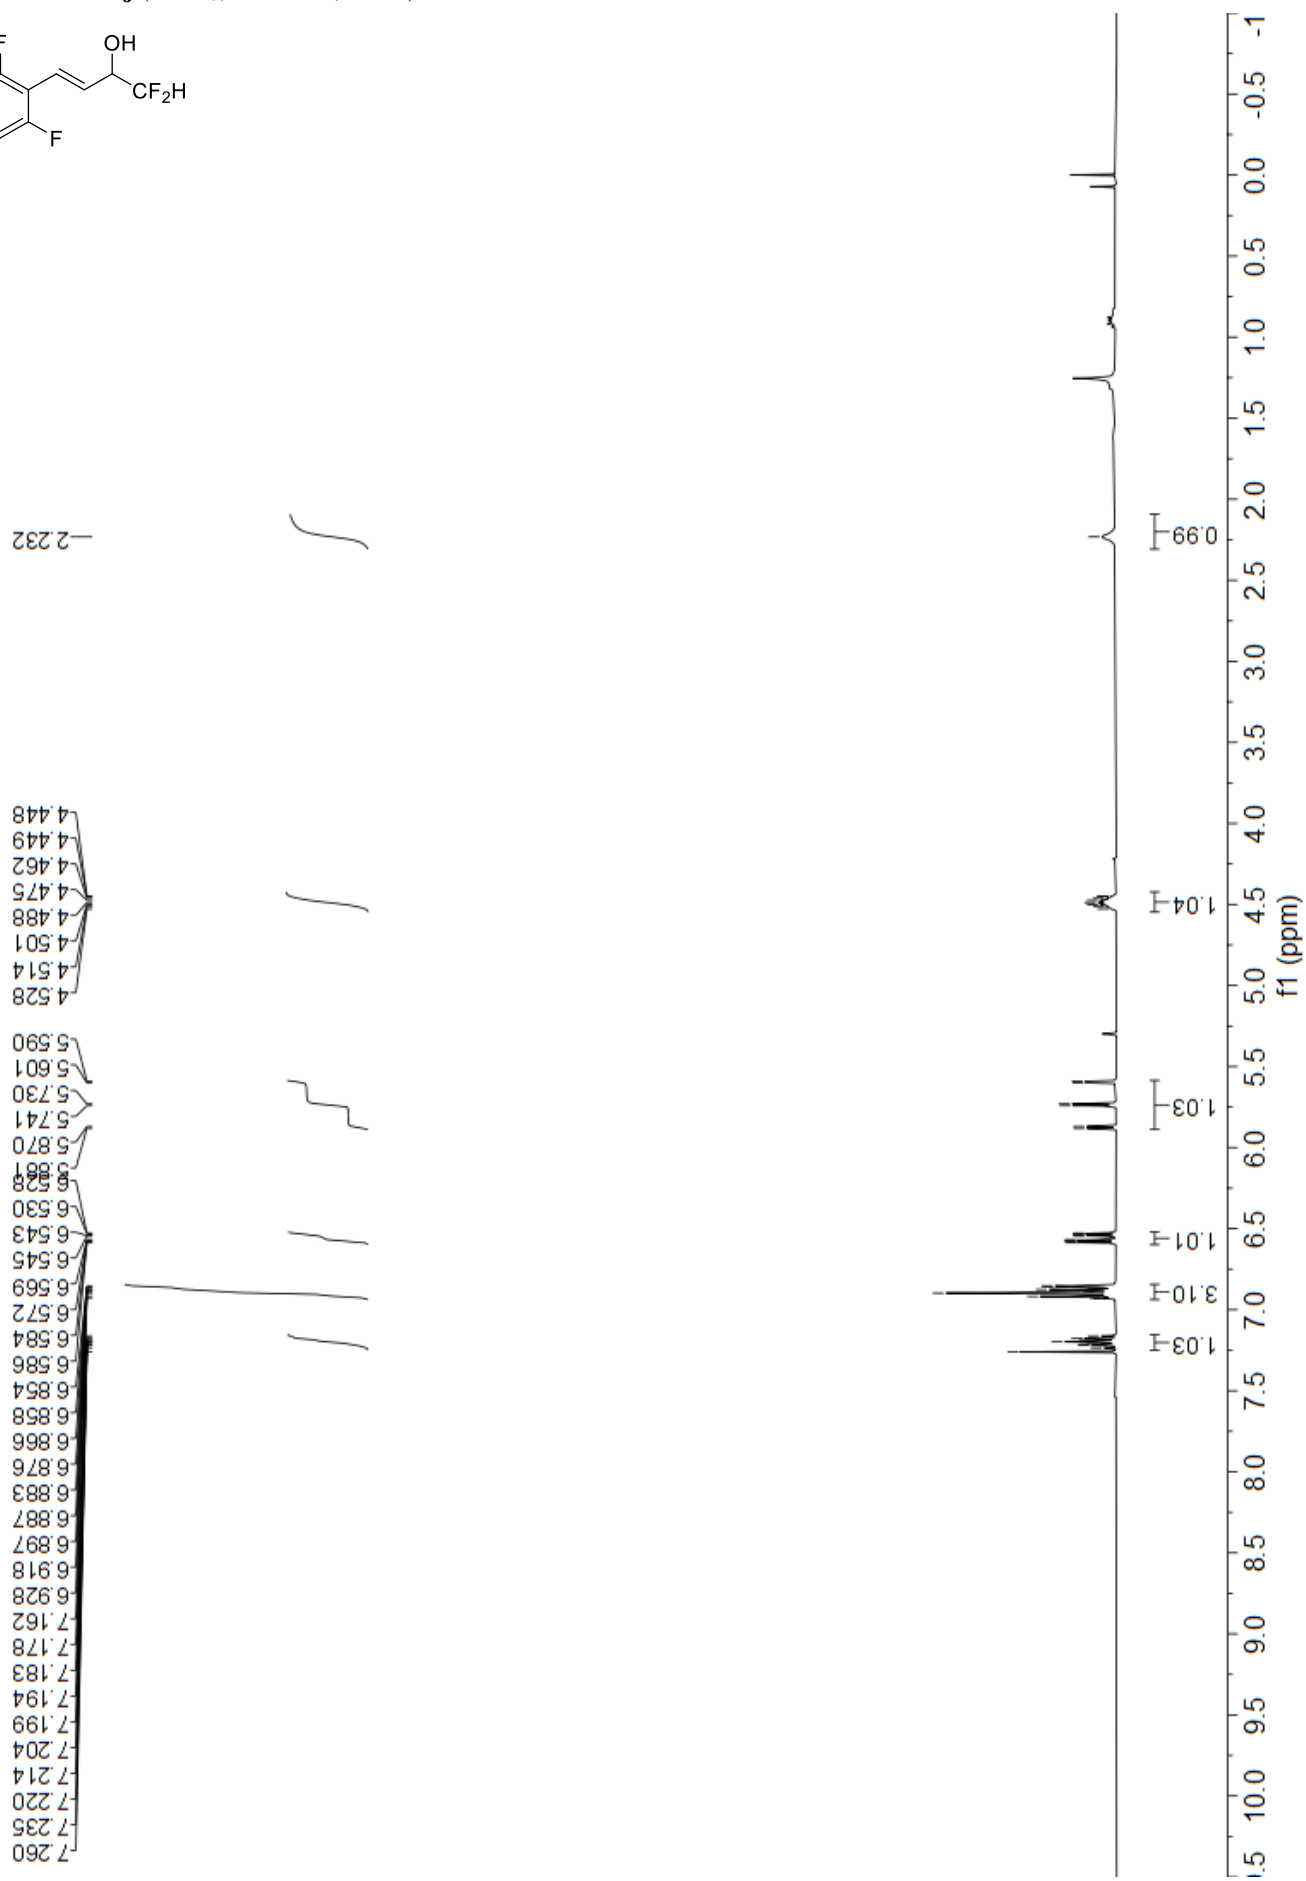

$^{13}\text{C}$  NMR of **14j** ( $\text{CDCl}_3$ , 150 MHz, 25 °C)

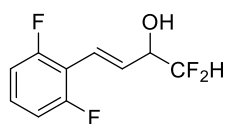

72.602  
72.765  
72.928  
76.949  
77.160  
77.372

111.656  
111.688  
111.799  
111.831  
113.307  
113.408  
113.509  
113.870  
115.498  
117.123  
121.170  
129.124  
129.196  
129.268  
129.406  
129.431  
129.460  
129.486  
129.514  
129.540  
129.568  
160.309  
160.359  
161.982  
162.031

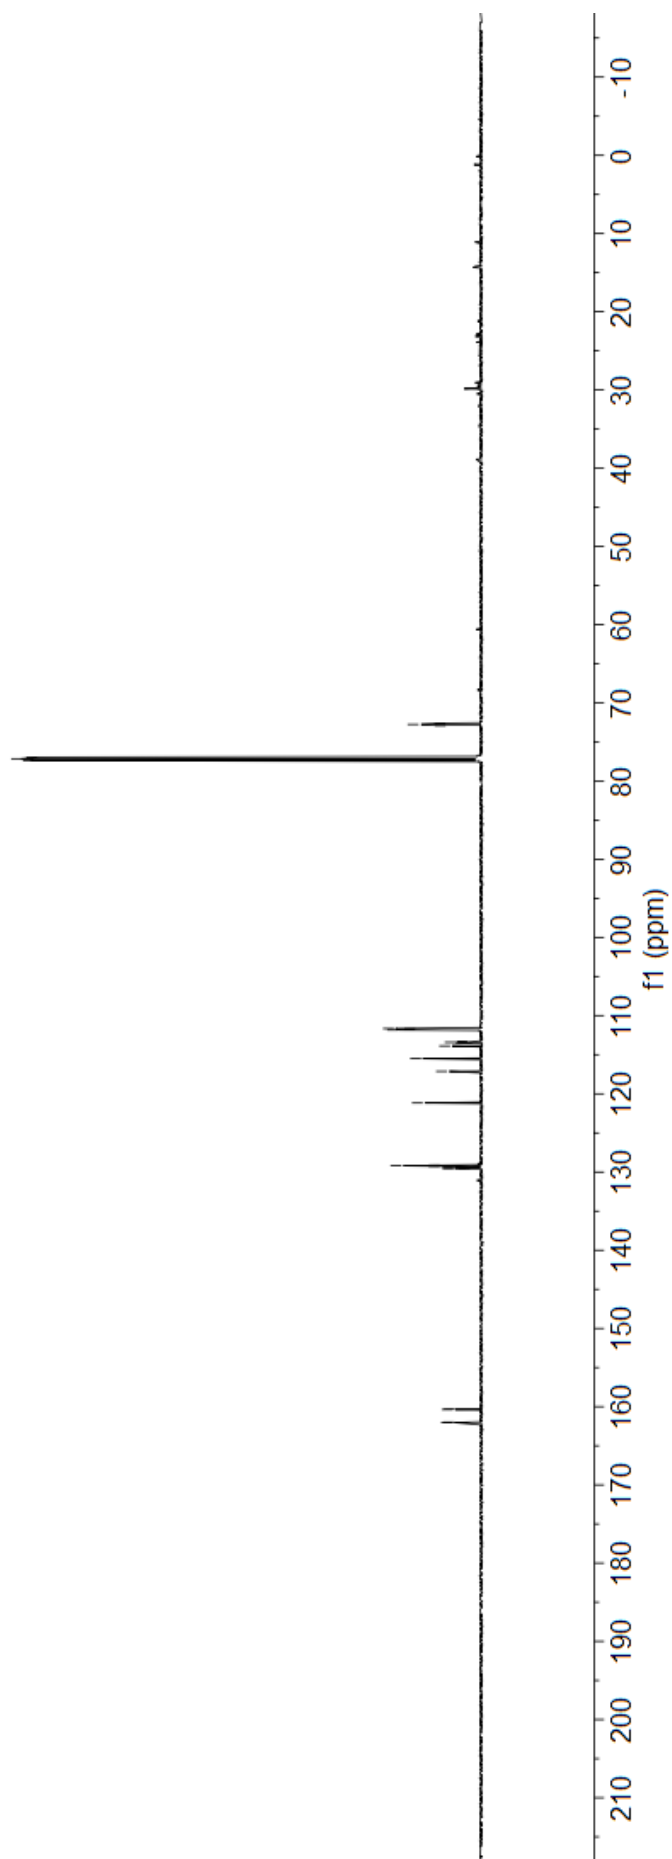

$^{19}\text{F}$  NMR of **14j** ( $\text{CDCl}_3$ , 375 MHz, 25  $^\circ\text{C}$ )

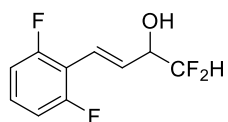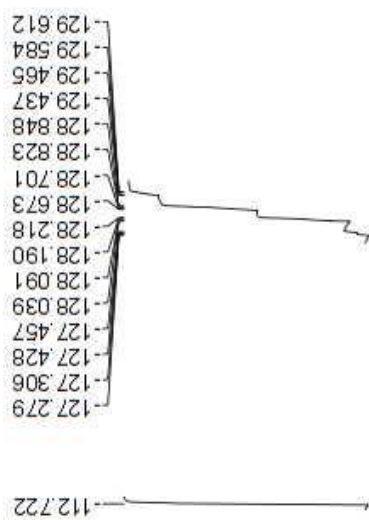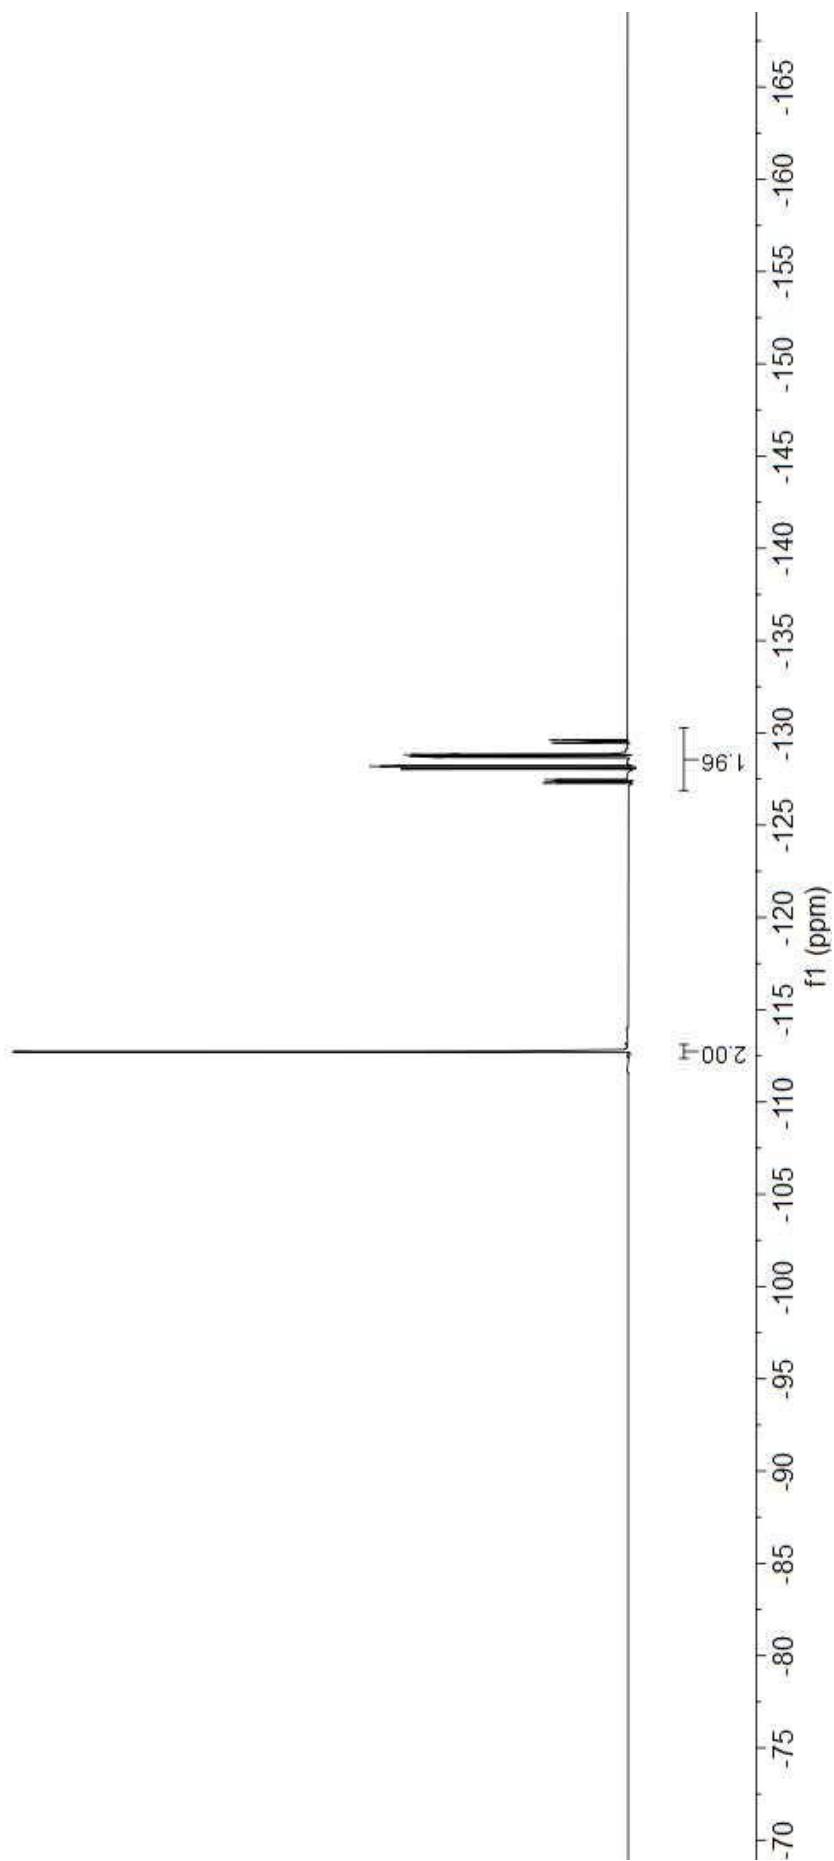



<sup>1</sup>H NMR of **14k** (CDCl<sub>3</sub>, 400 MHz, 25 °C)

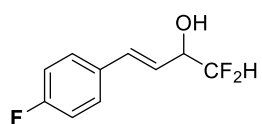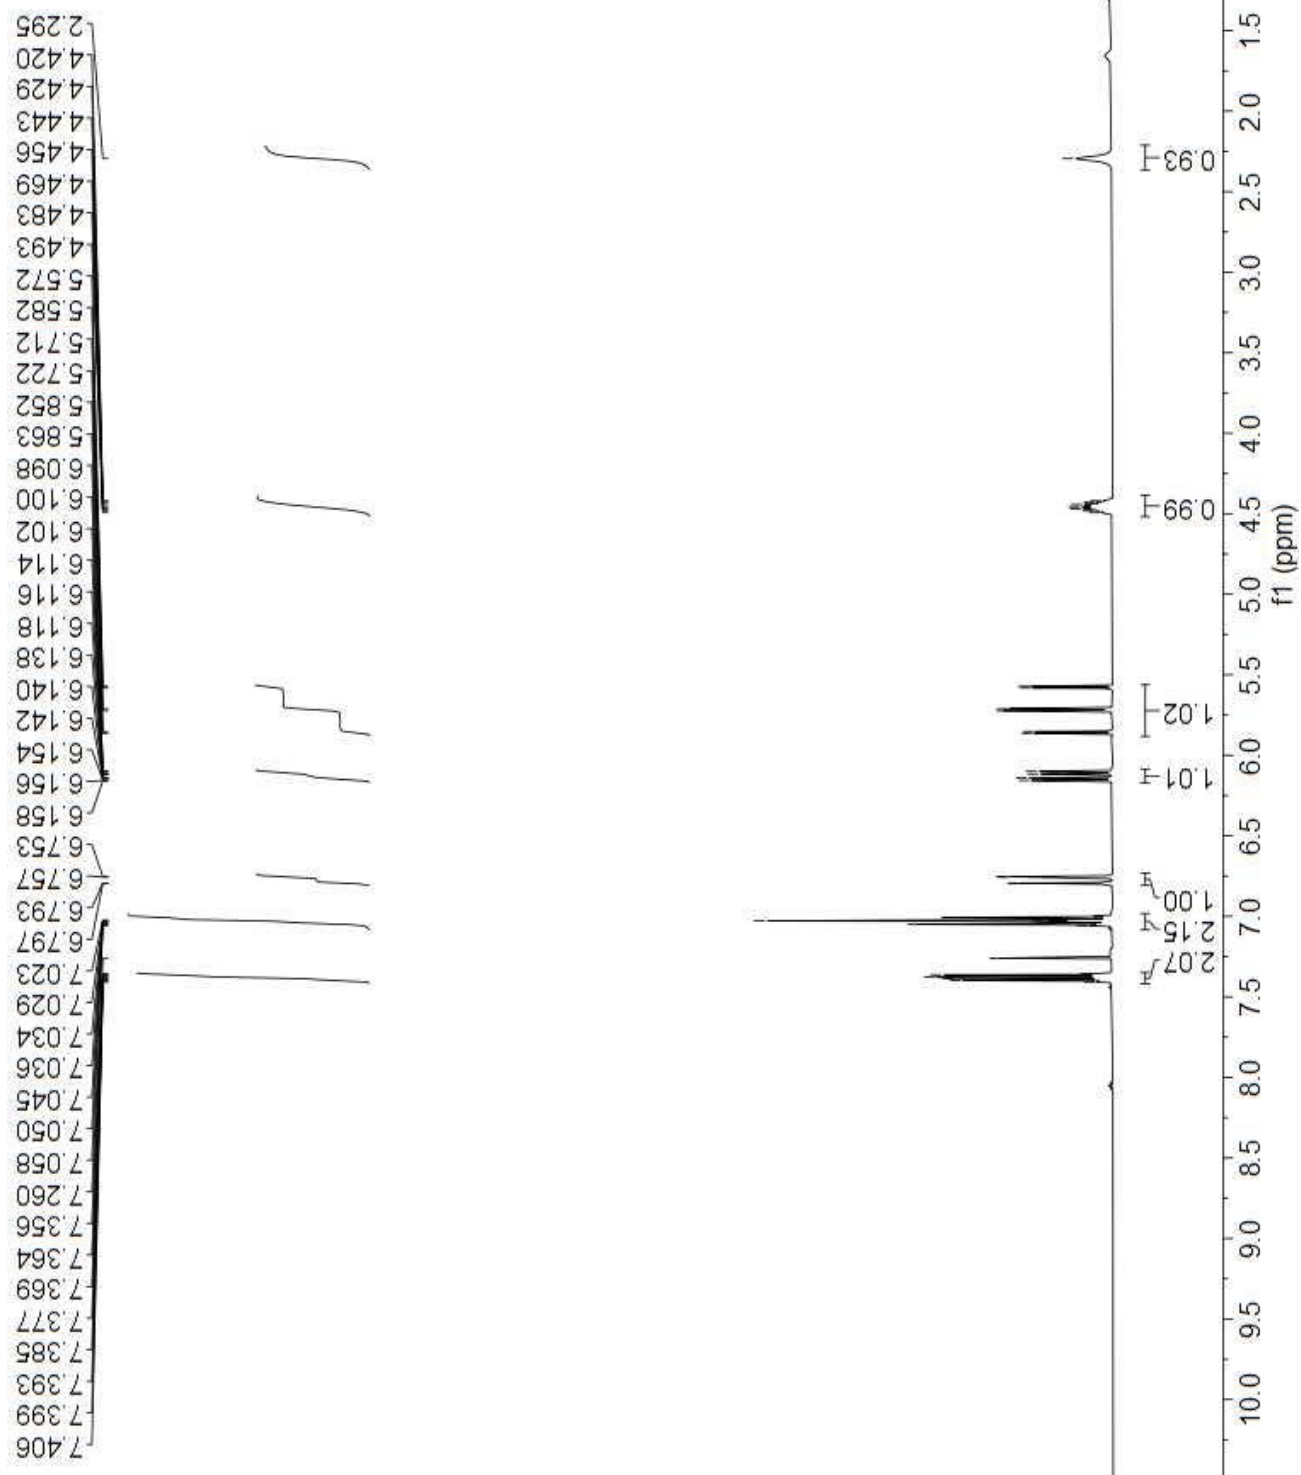

$^{13}\text{C}$  NMR of **14k** ( $\text{CDCl}_3$ , 100 MHz, 25 °C)

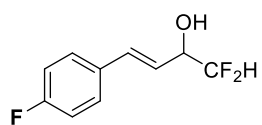

77.479  
77.160  
76.842  
72.510  
72.265  
72.020

133.789  
132.149  
132.117  
128.557  
128.476  
122.380  
118.031  
115.904  
115.688  
115.591  
113.151

164.157  
161.690

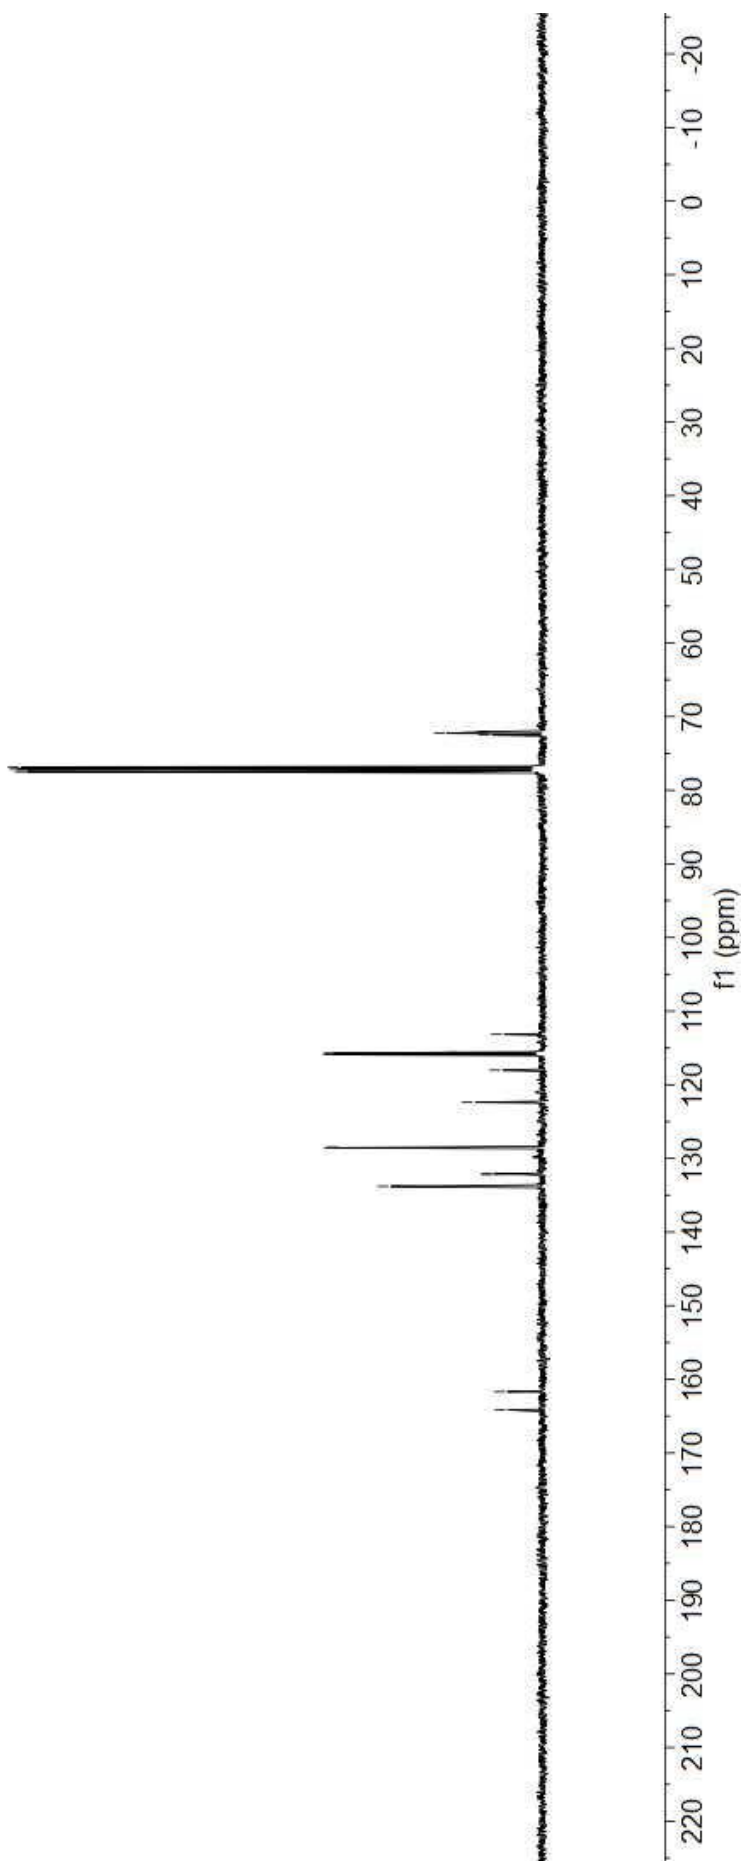

$^{19}\text{F}$  NMR of **14k** ( $\text{CDCl}_3$ , 375 MHz, 25  $^\circ\text{C}$ )

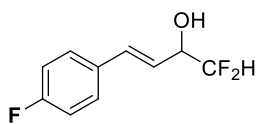

-129.710  
-129.682  
-129.561  
-129.533  
-128.950  
-128.921  
-128.800  
-128.772  
-128.230  
-128.201  
-128.081  
-128.051  
-127.481  
-127.469  
-127.441  
-127.319  
-127.290  
-127.270  
-113.046  
-113.031  
-113.020  
-113.007  
-112.992  
-112.981  
-112.966

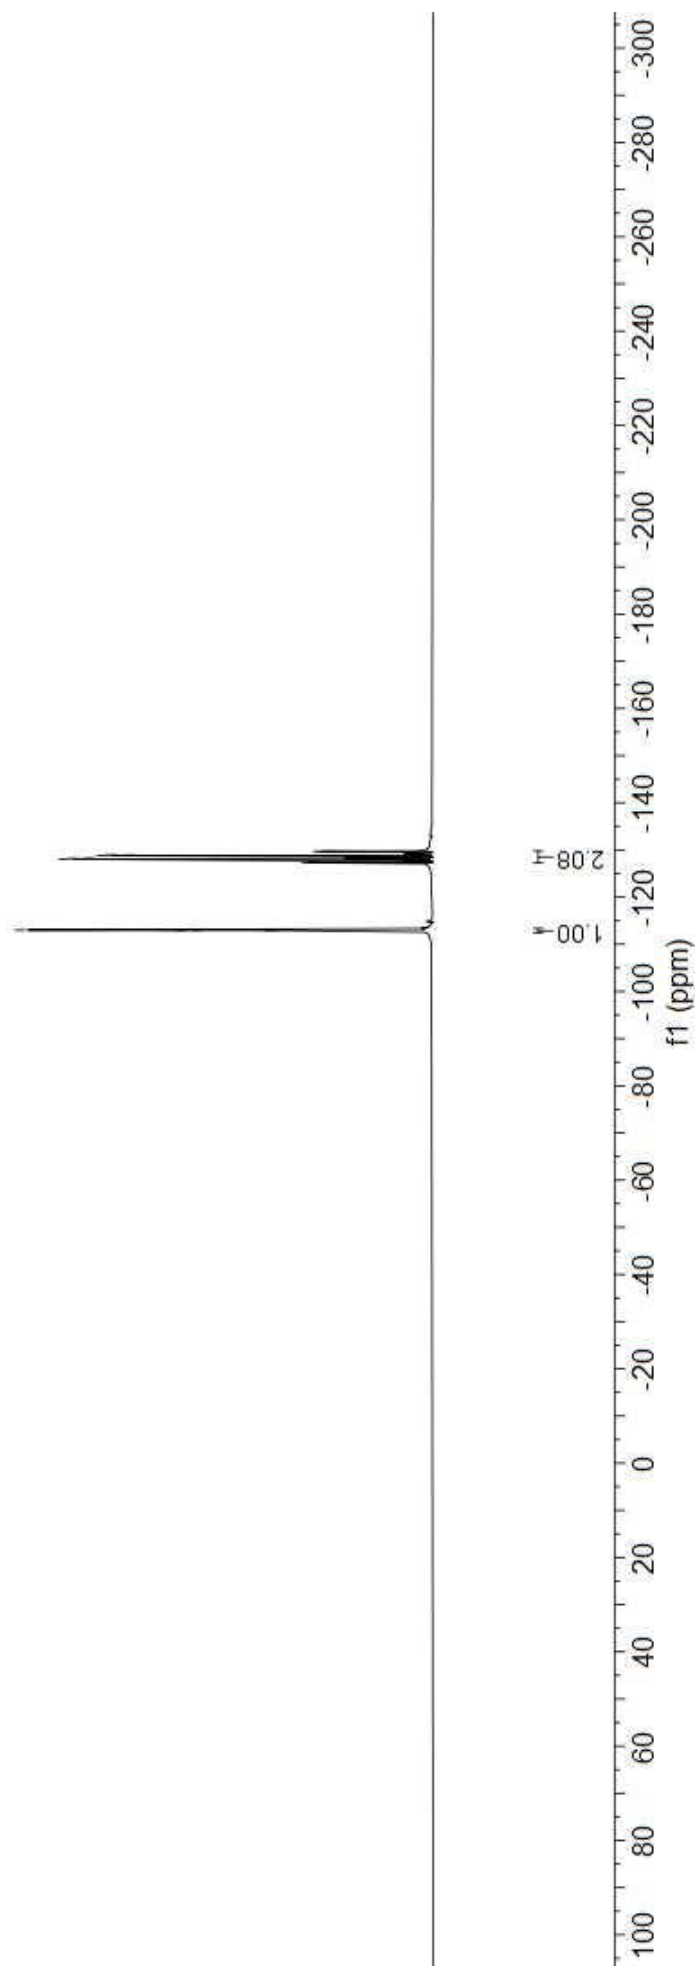

<sup>1</sup>H NMR of **14i** (CDCl<sub>3</sub>, 400 MHz, 25 °C)

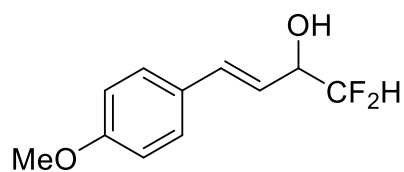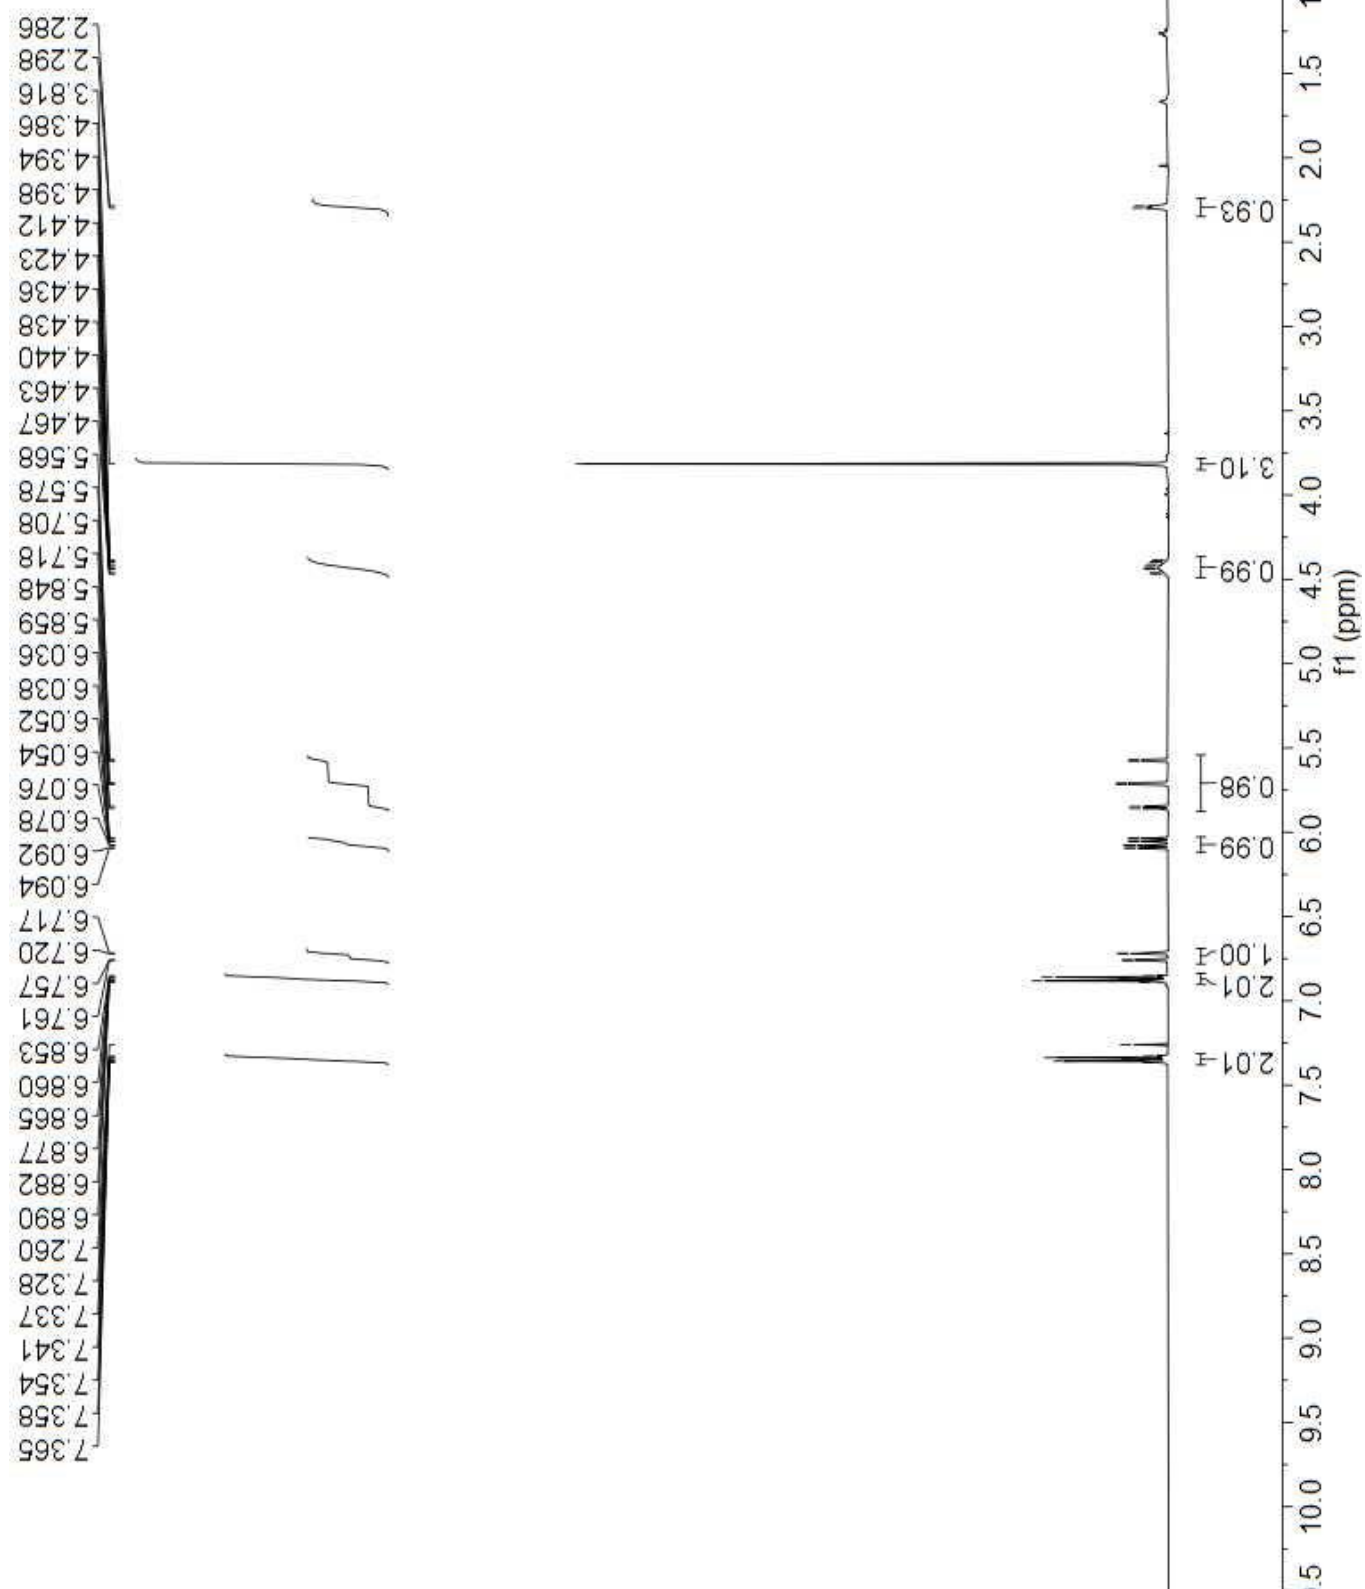

$^{13}\text{C}$  NMR of **141** ( $\text{CDCl}_3$ , 100 MHz, 25 °C)

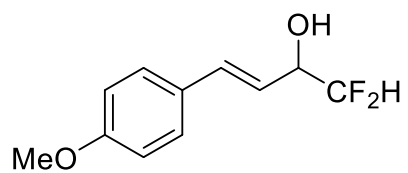

55.444  
72.289  
72.533  
72.777  
76.843  
77.161  
77.478

113.254  
114.225  
115.693  
118.131  
120.298  
120.337  
120.379  
128.184  
128.699  
134.654

159.964

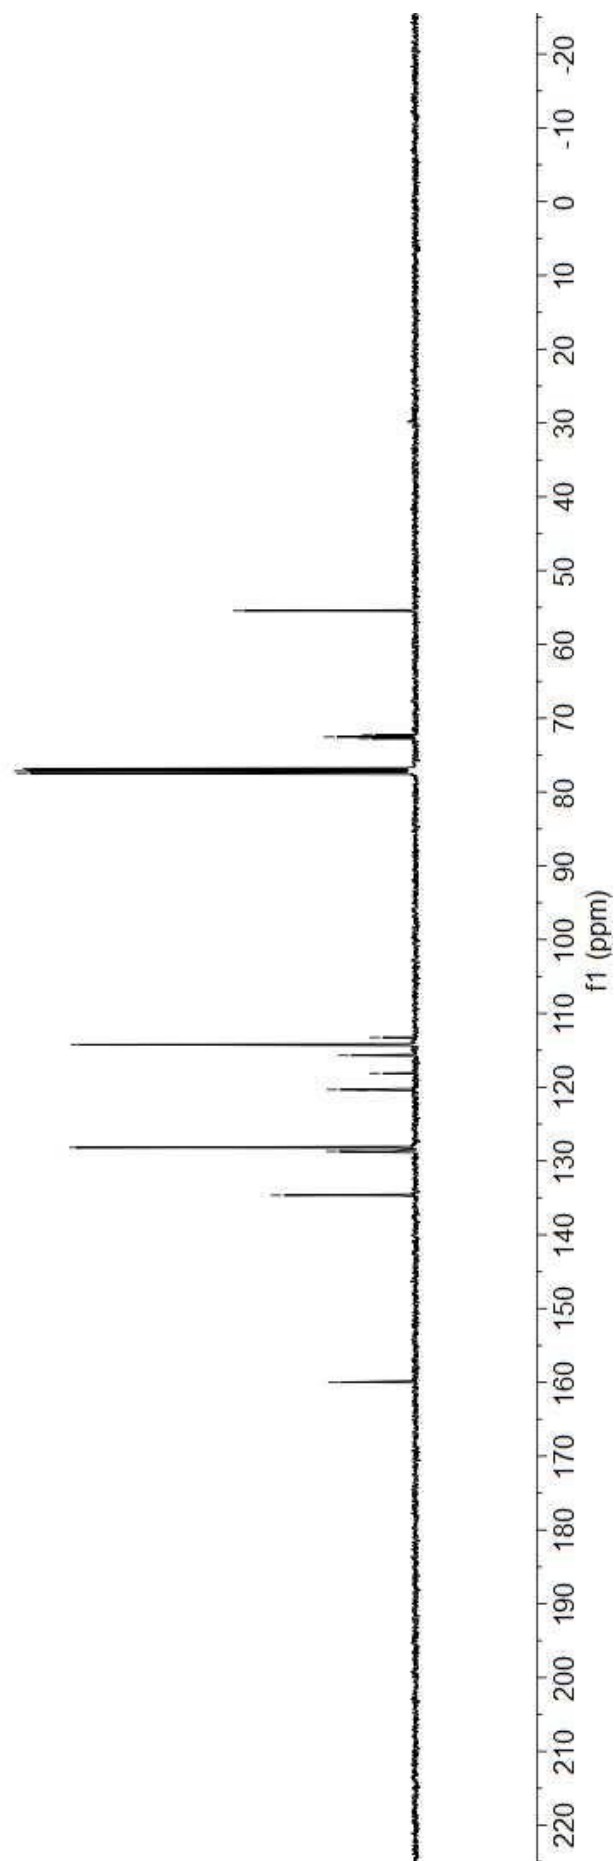

$^{19}\text{F}$  NMR of **14I** ( $\text{CDCl}_3$ , 375 MHz, 25 °C)

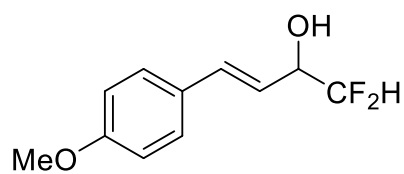

-129.584  
-129.556  
-129.436  
-129.407  
-128.827  
-128.796  
-128.677  
-128.649  
-128.424  
-128.395  
-128.378  
-128.274  
-128.245  
-127.666  
-127.635  
-127.516  
-127.485

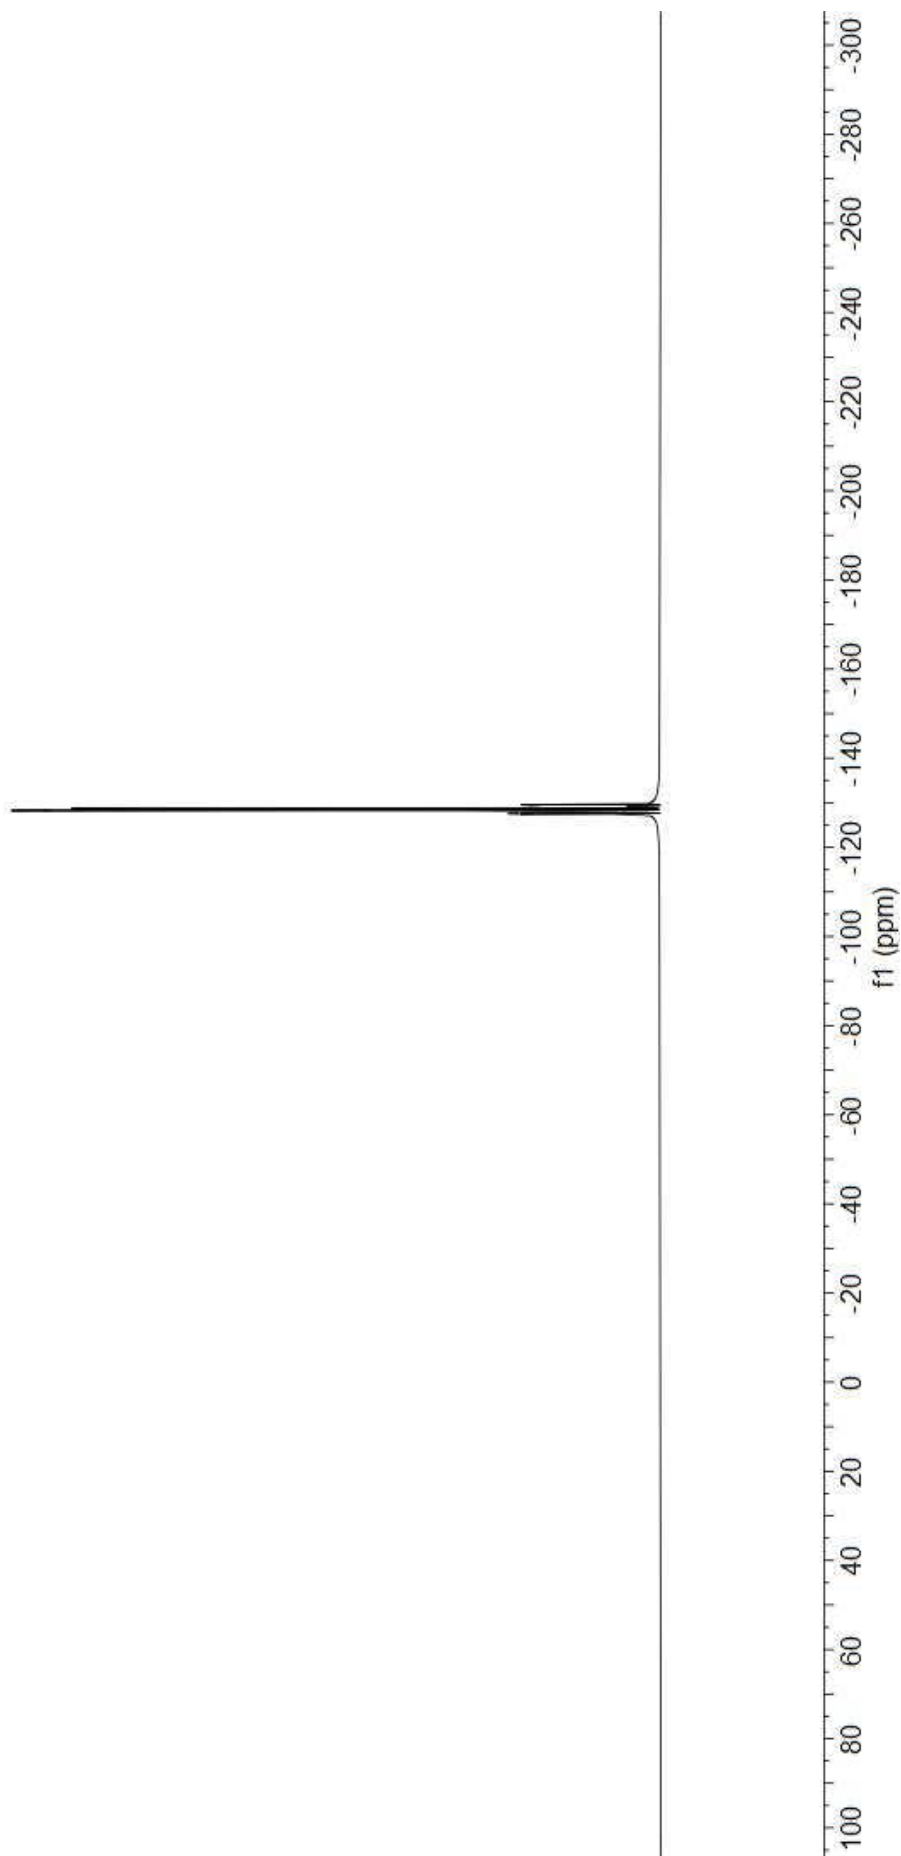

<sup>1</sup>H NMR of **17** (DMSO-d<sub>6</sub>, 600 MHz, 25 °C)

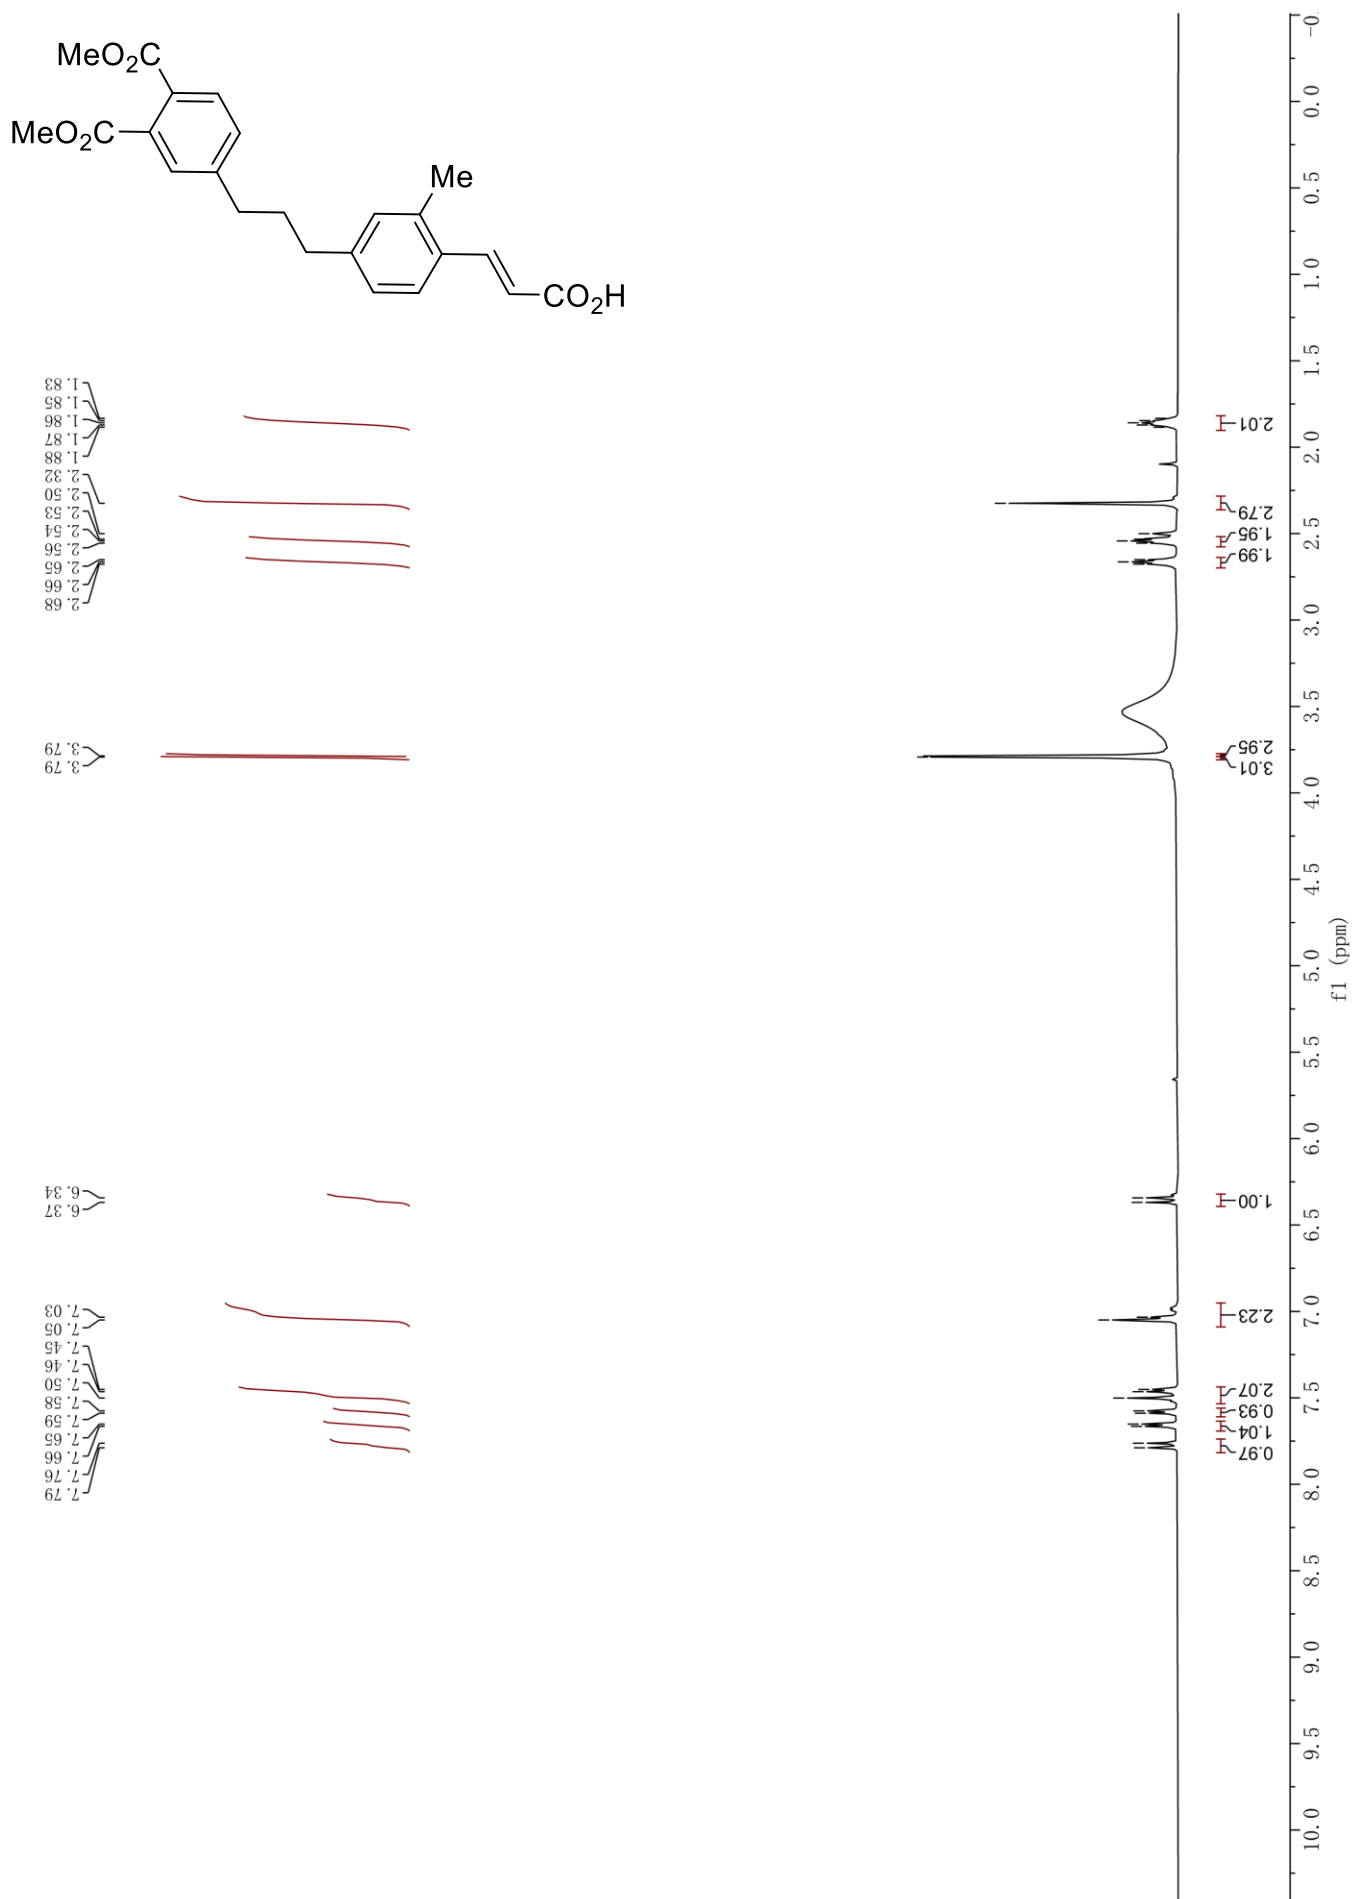

$^{13}\text{C}$  NMR of **17** (DMSO- $d_6$ , 150 MHz, 25 °C)

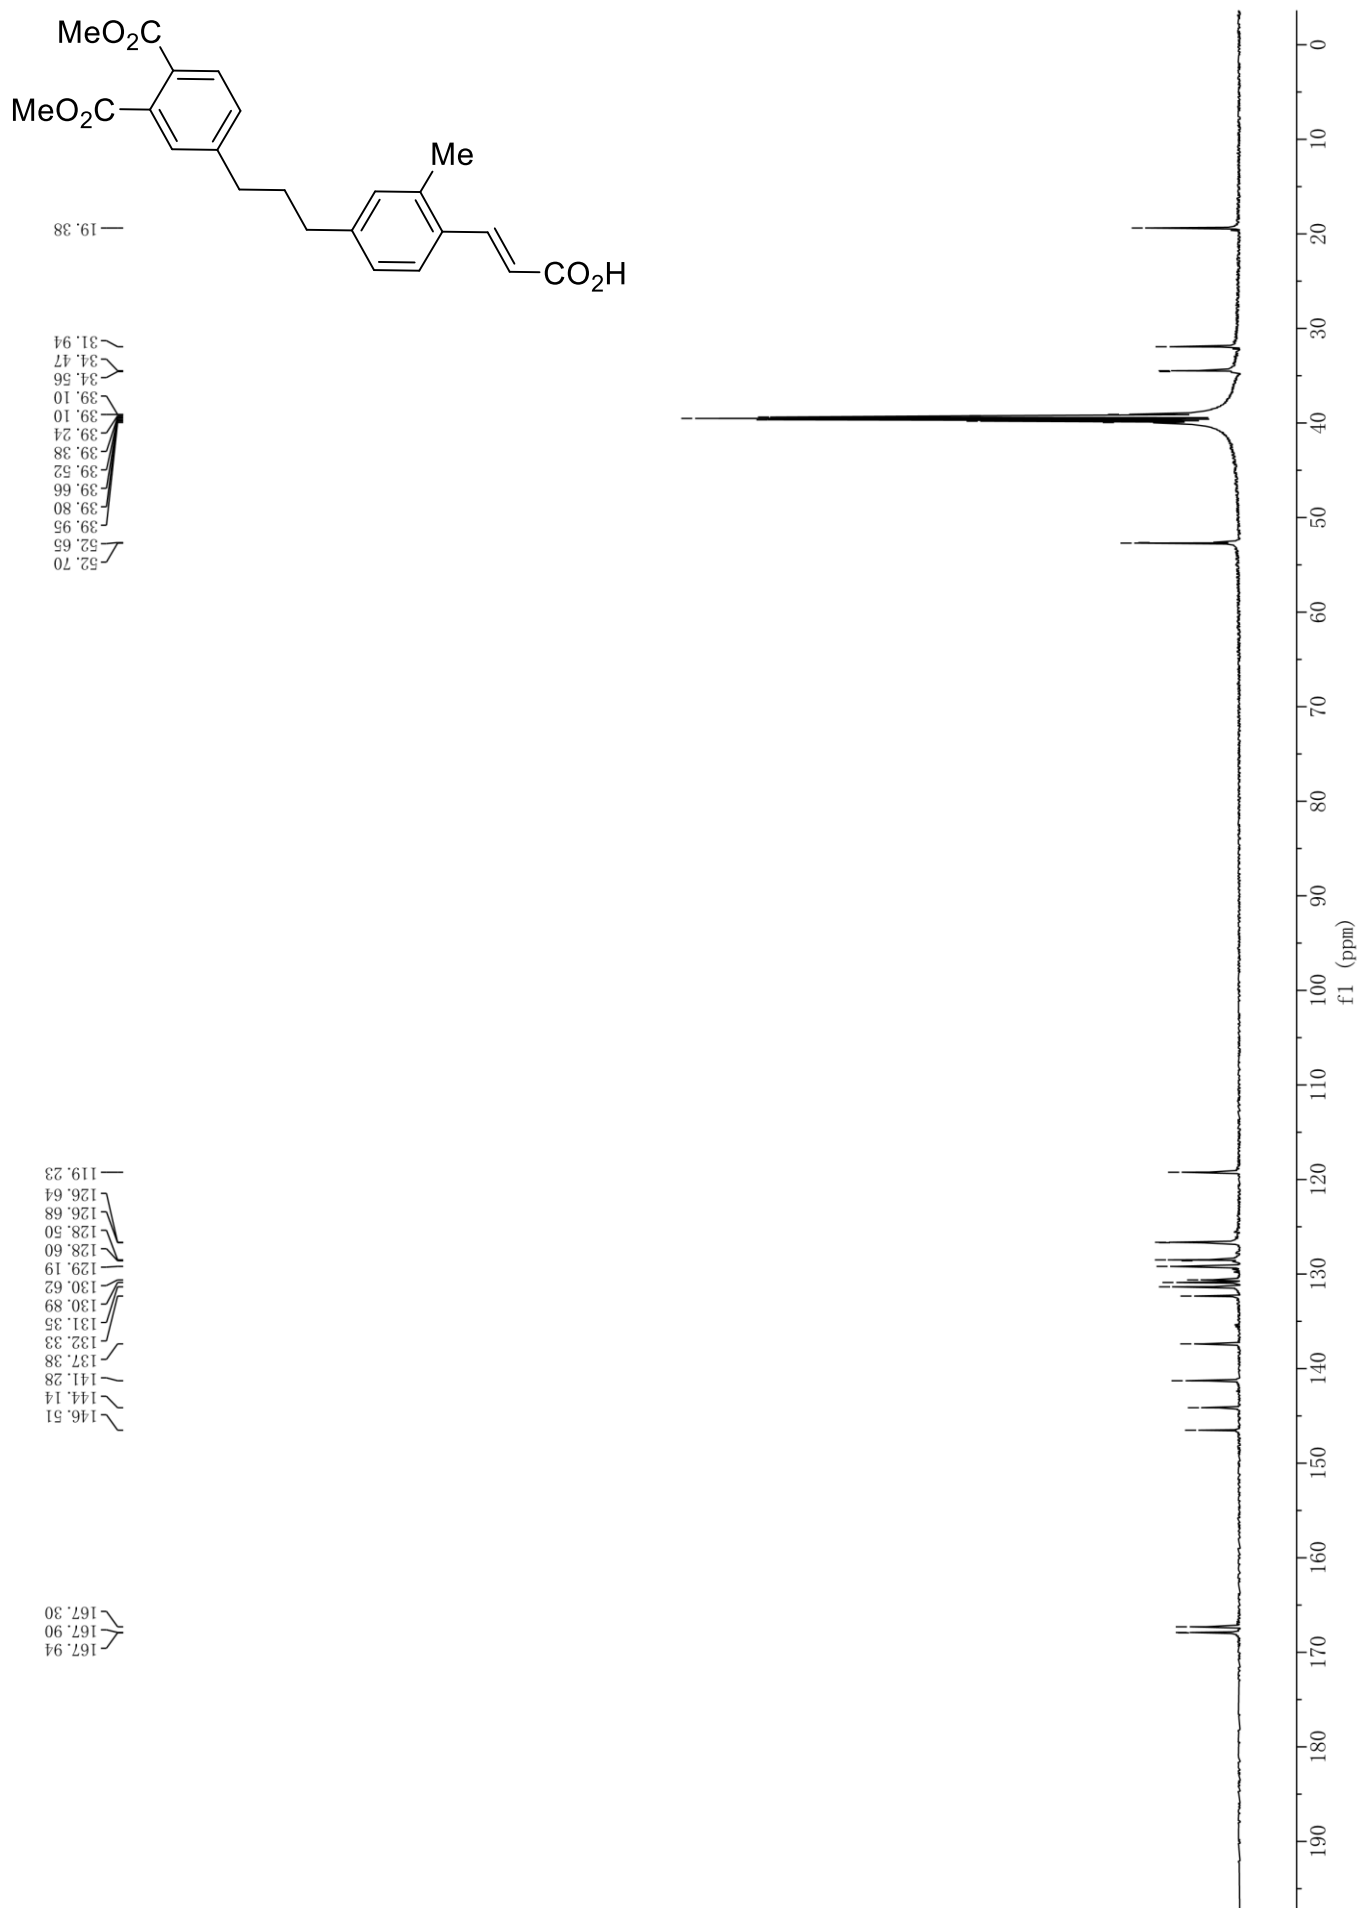



$^1\text{H}$  NMR of **18** ( $\text{CDCl}_3$ , 400 MHz, 25 °C)

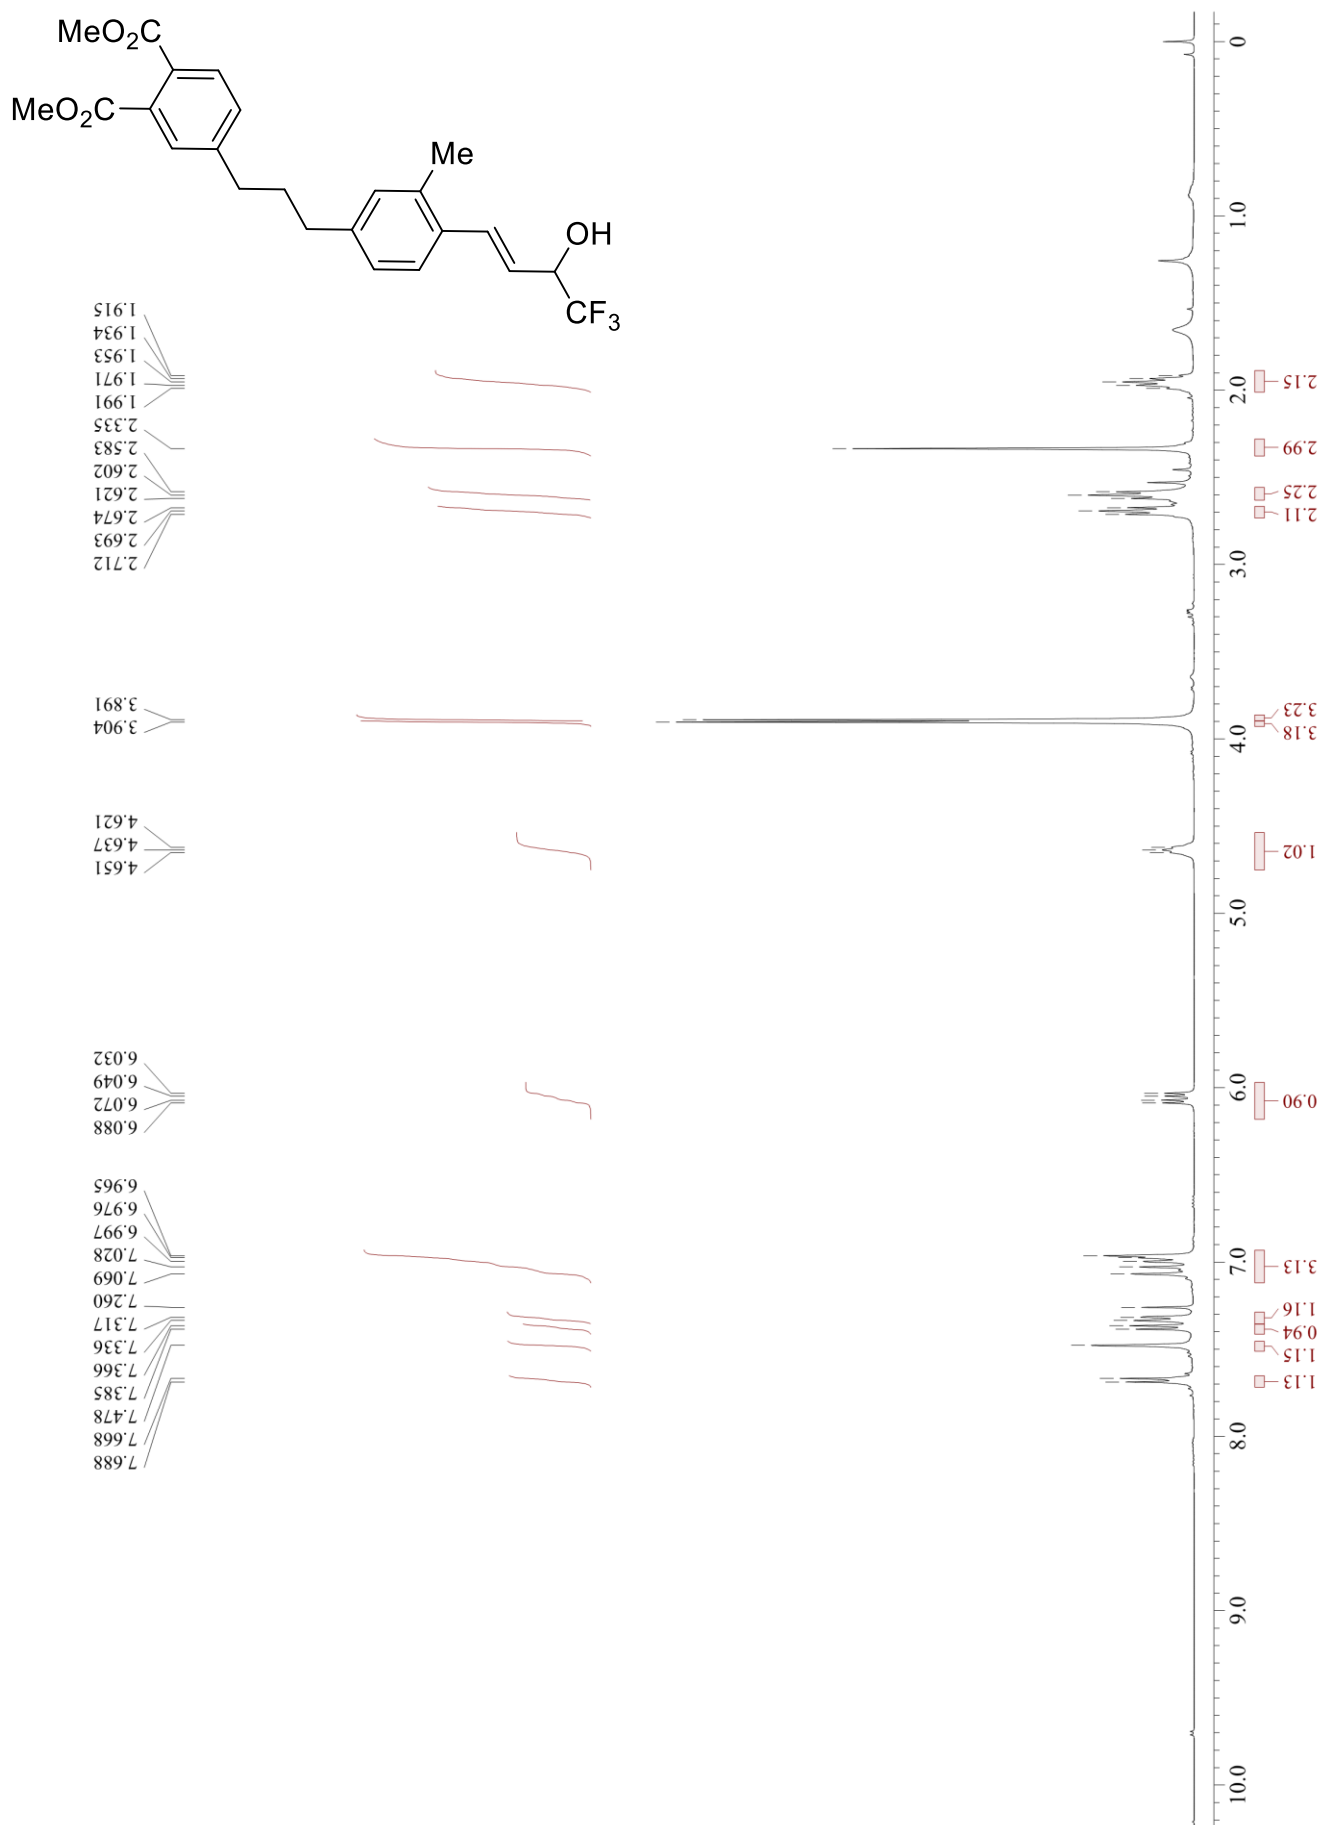

$^{13}\text{C}$  NMR of **18** ( $\text{CDCl}_3$ , 100 MHz, 25 °C)

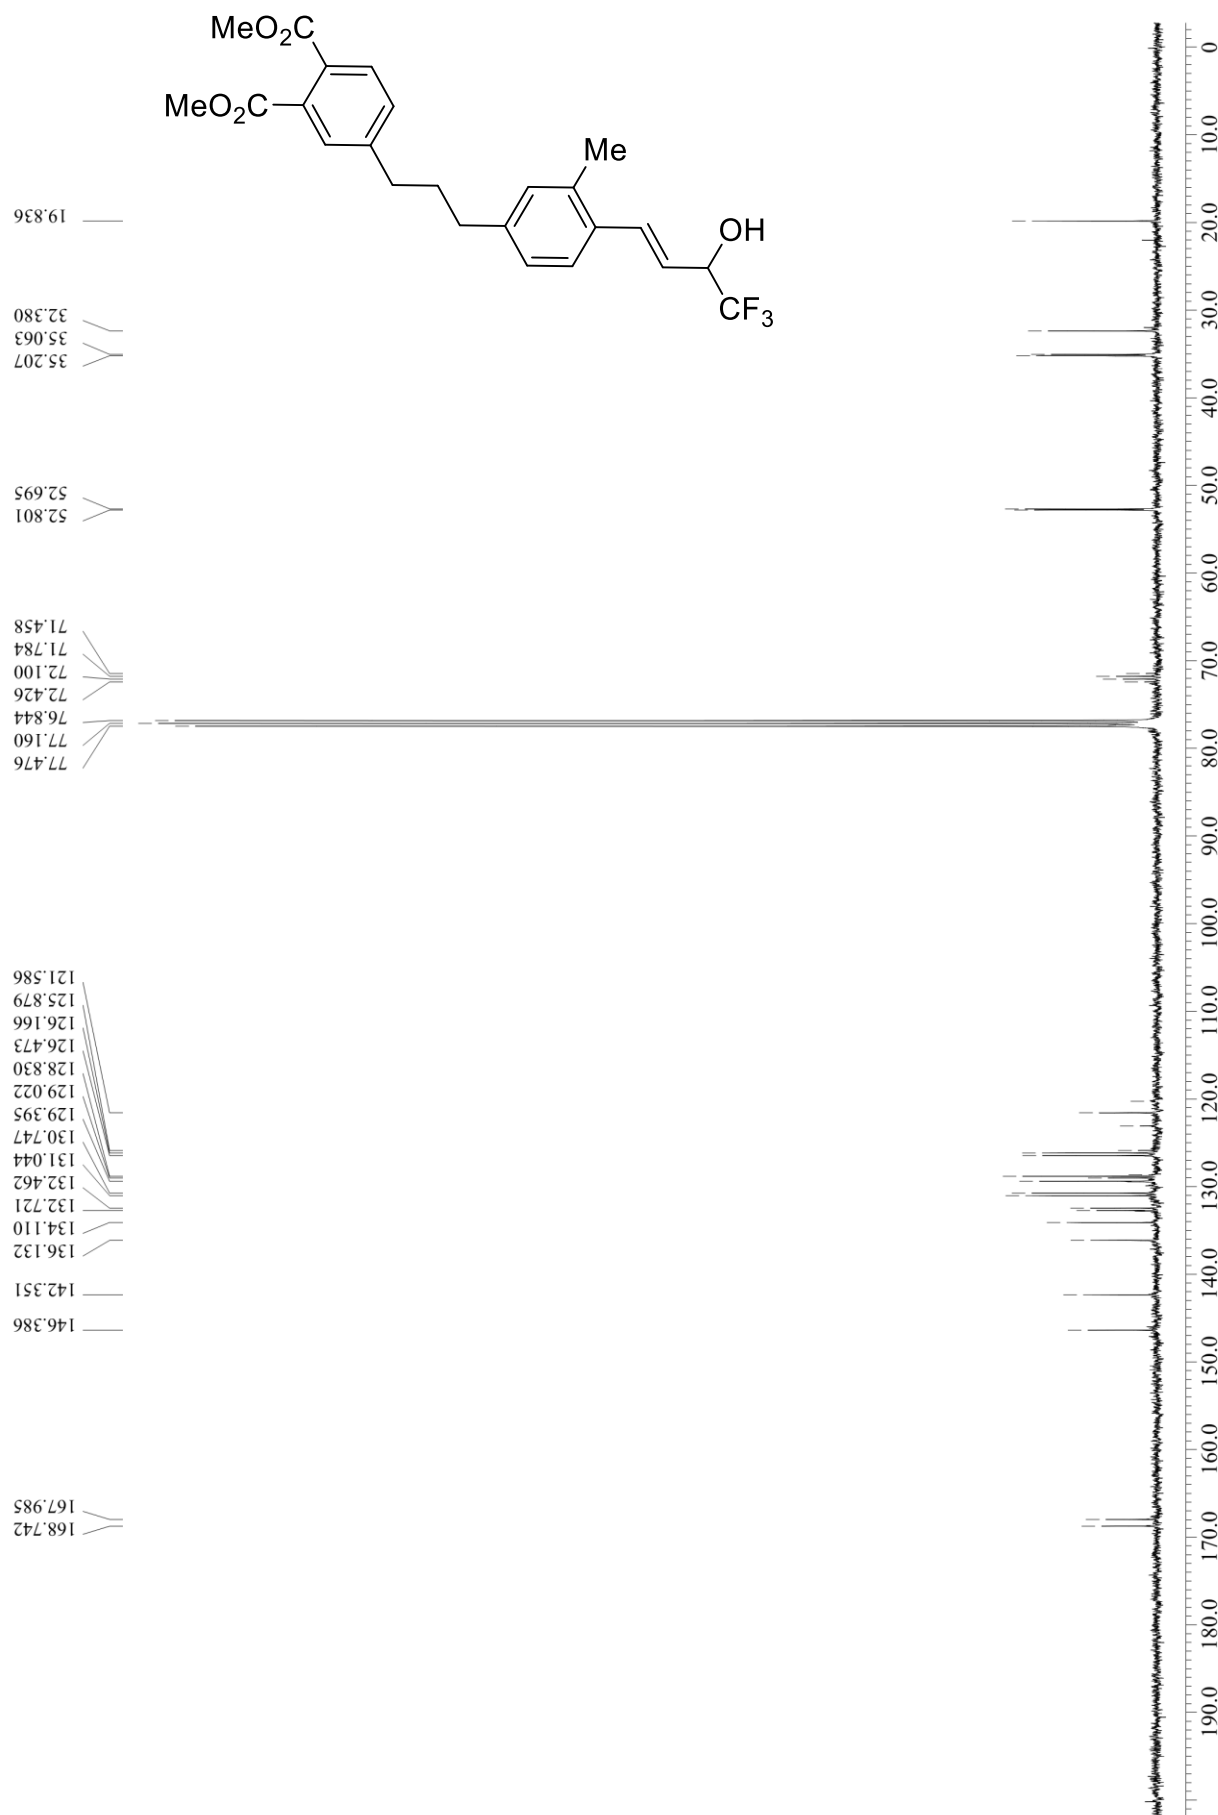

$^{19}\text{F}$  NMR of **18** ( $\text{CDCl}_3$ , 375 MHz, 25 °C)

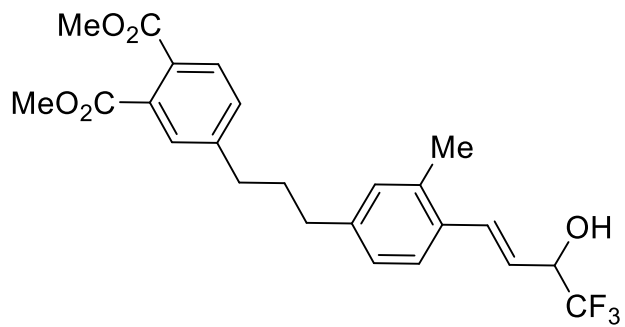

-78.966  
-78.942

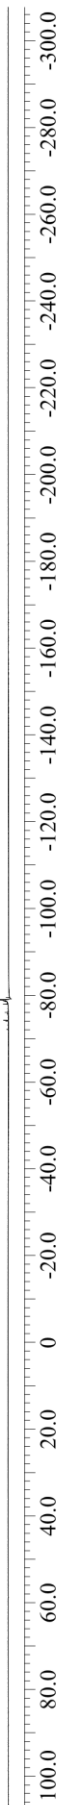

<sup>1</sup>H NMR of **19** (CDCl<sub>3</sub>, 400 MHz, 25 °C)

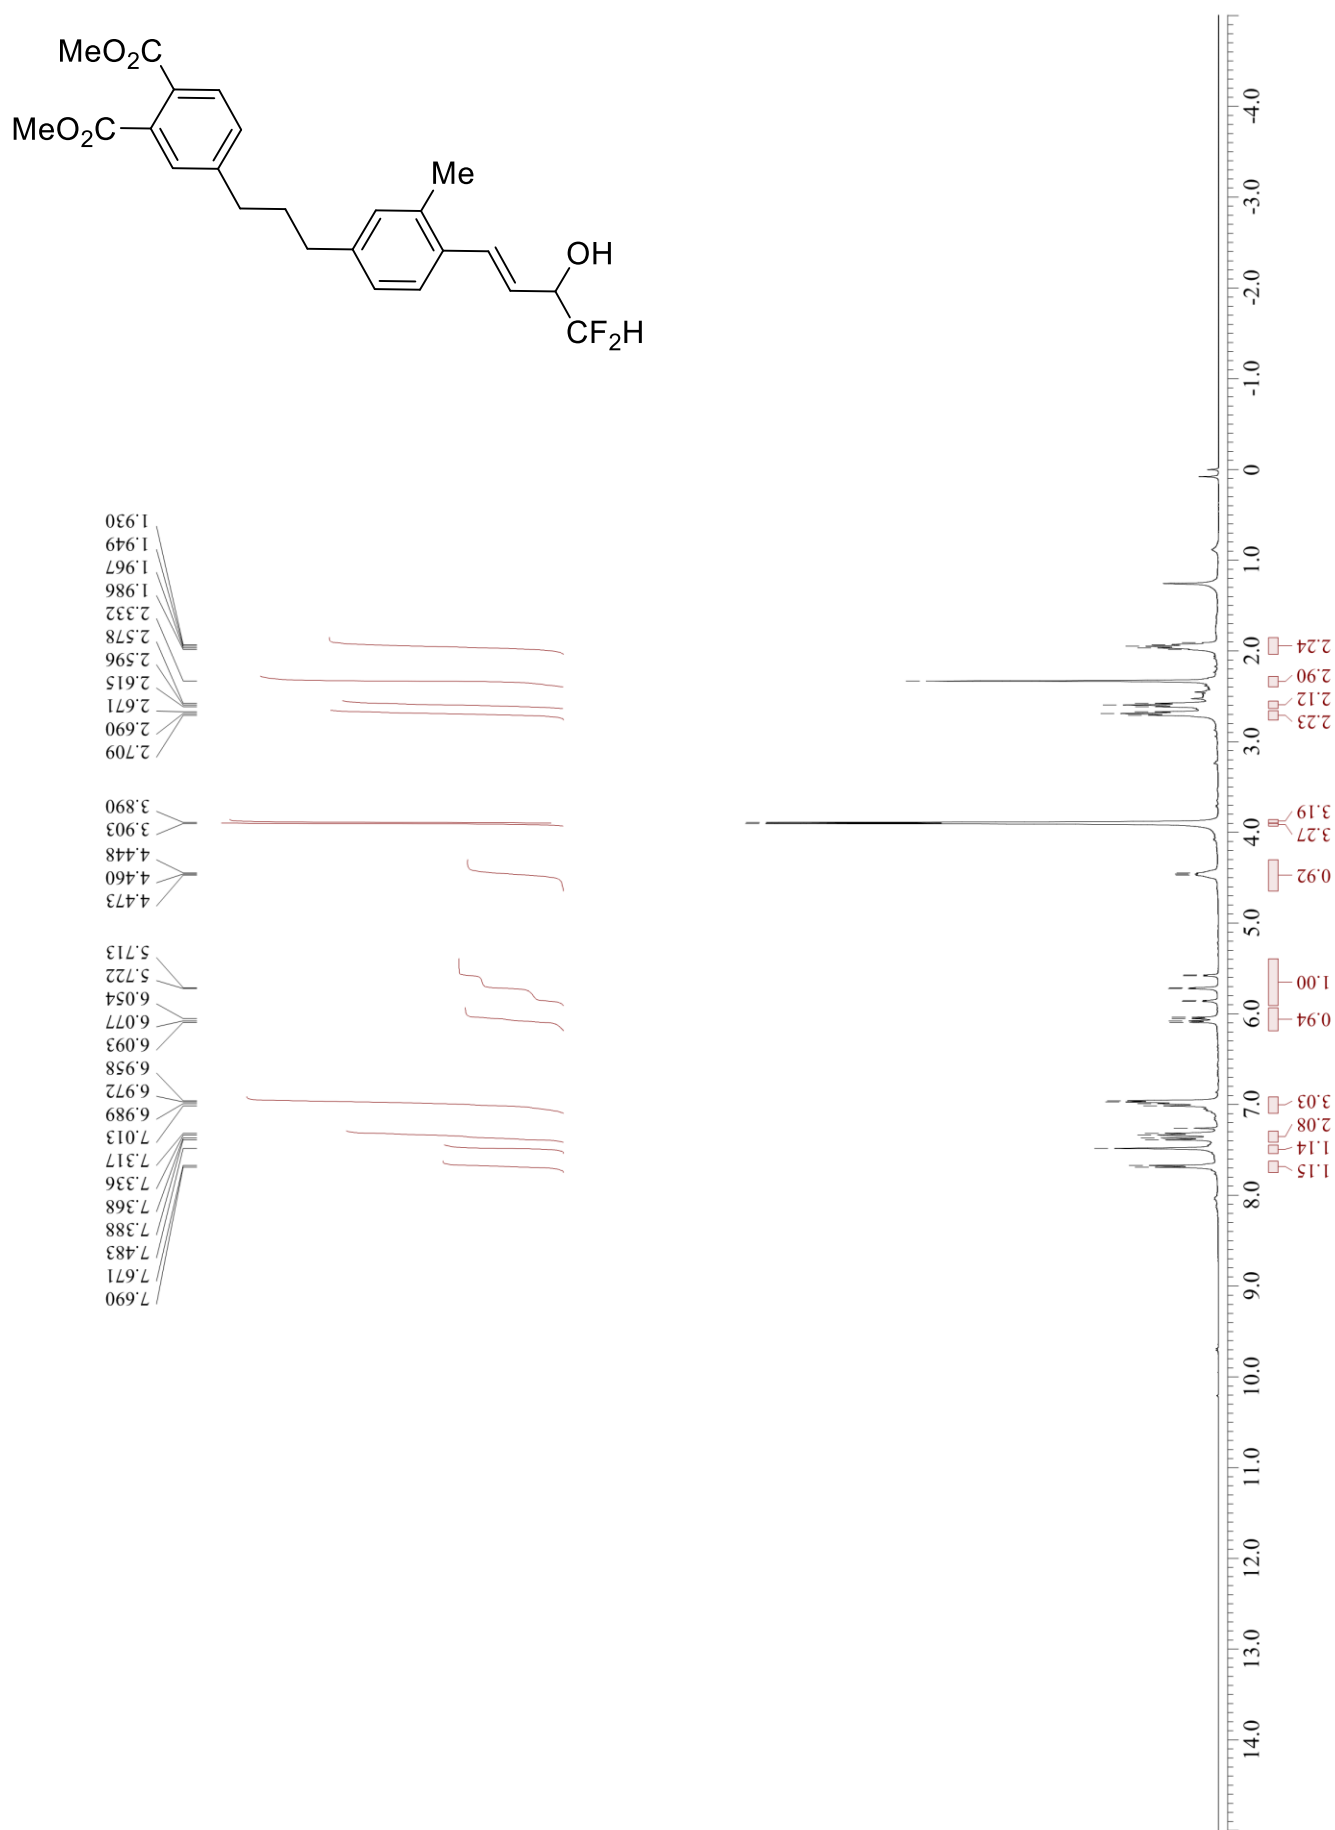

$^{13}\text{C}$  NMR of **19**( $\text{CDCl}_3$ , 150 MHz, 25 °C)

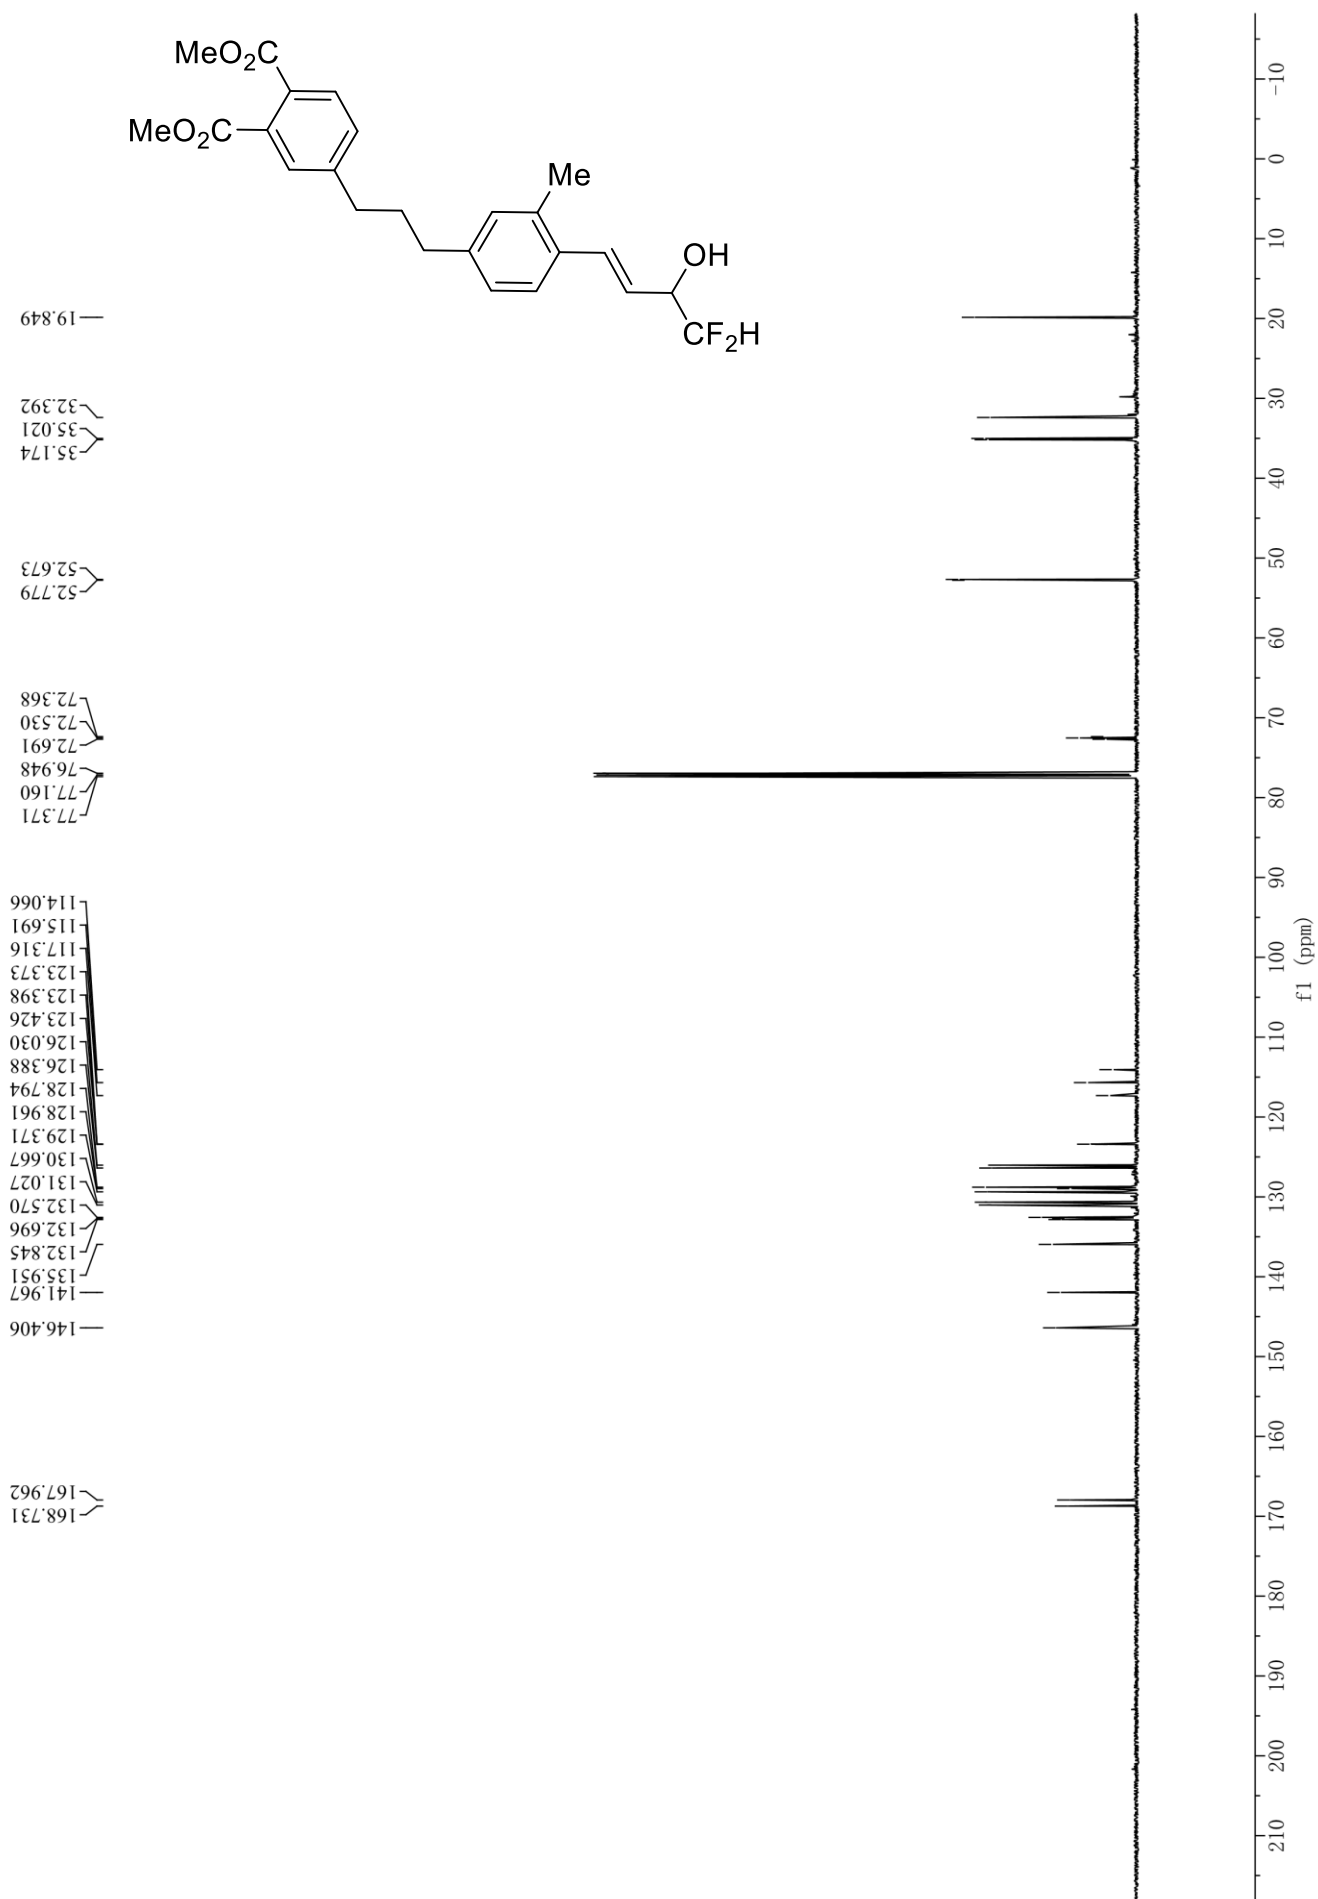

$^{19}\text{F}$  NMR of **19** ( $\text{CDCl}_3$ , 375 MHz, 25 °C)

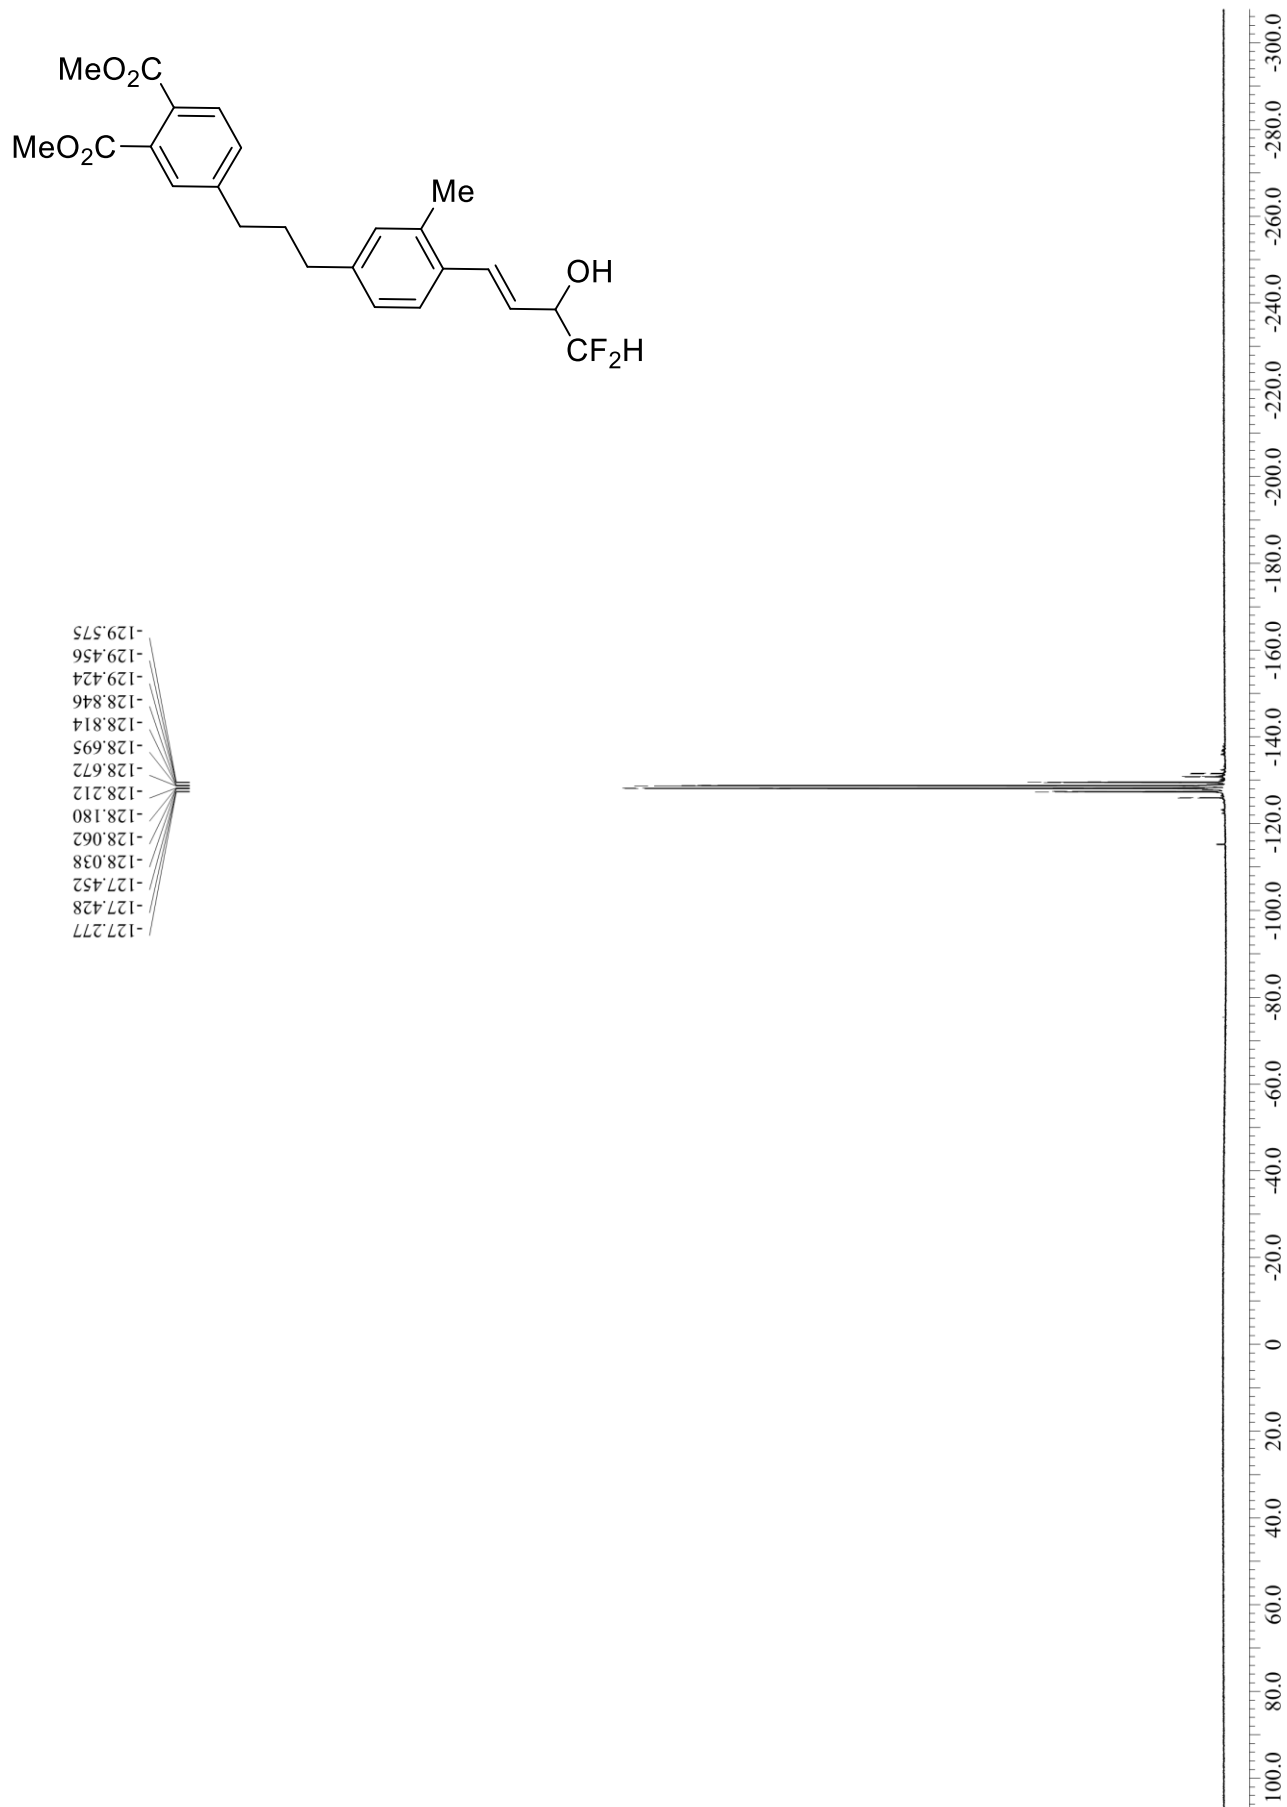

<sup>1</sup>H NMR of **antitumor agent Z** (CDCl<sub>3</sub>, 400 MHz, 25 °C)

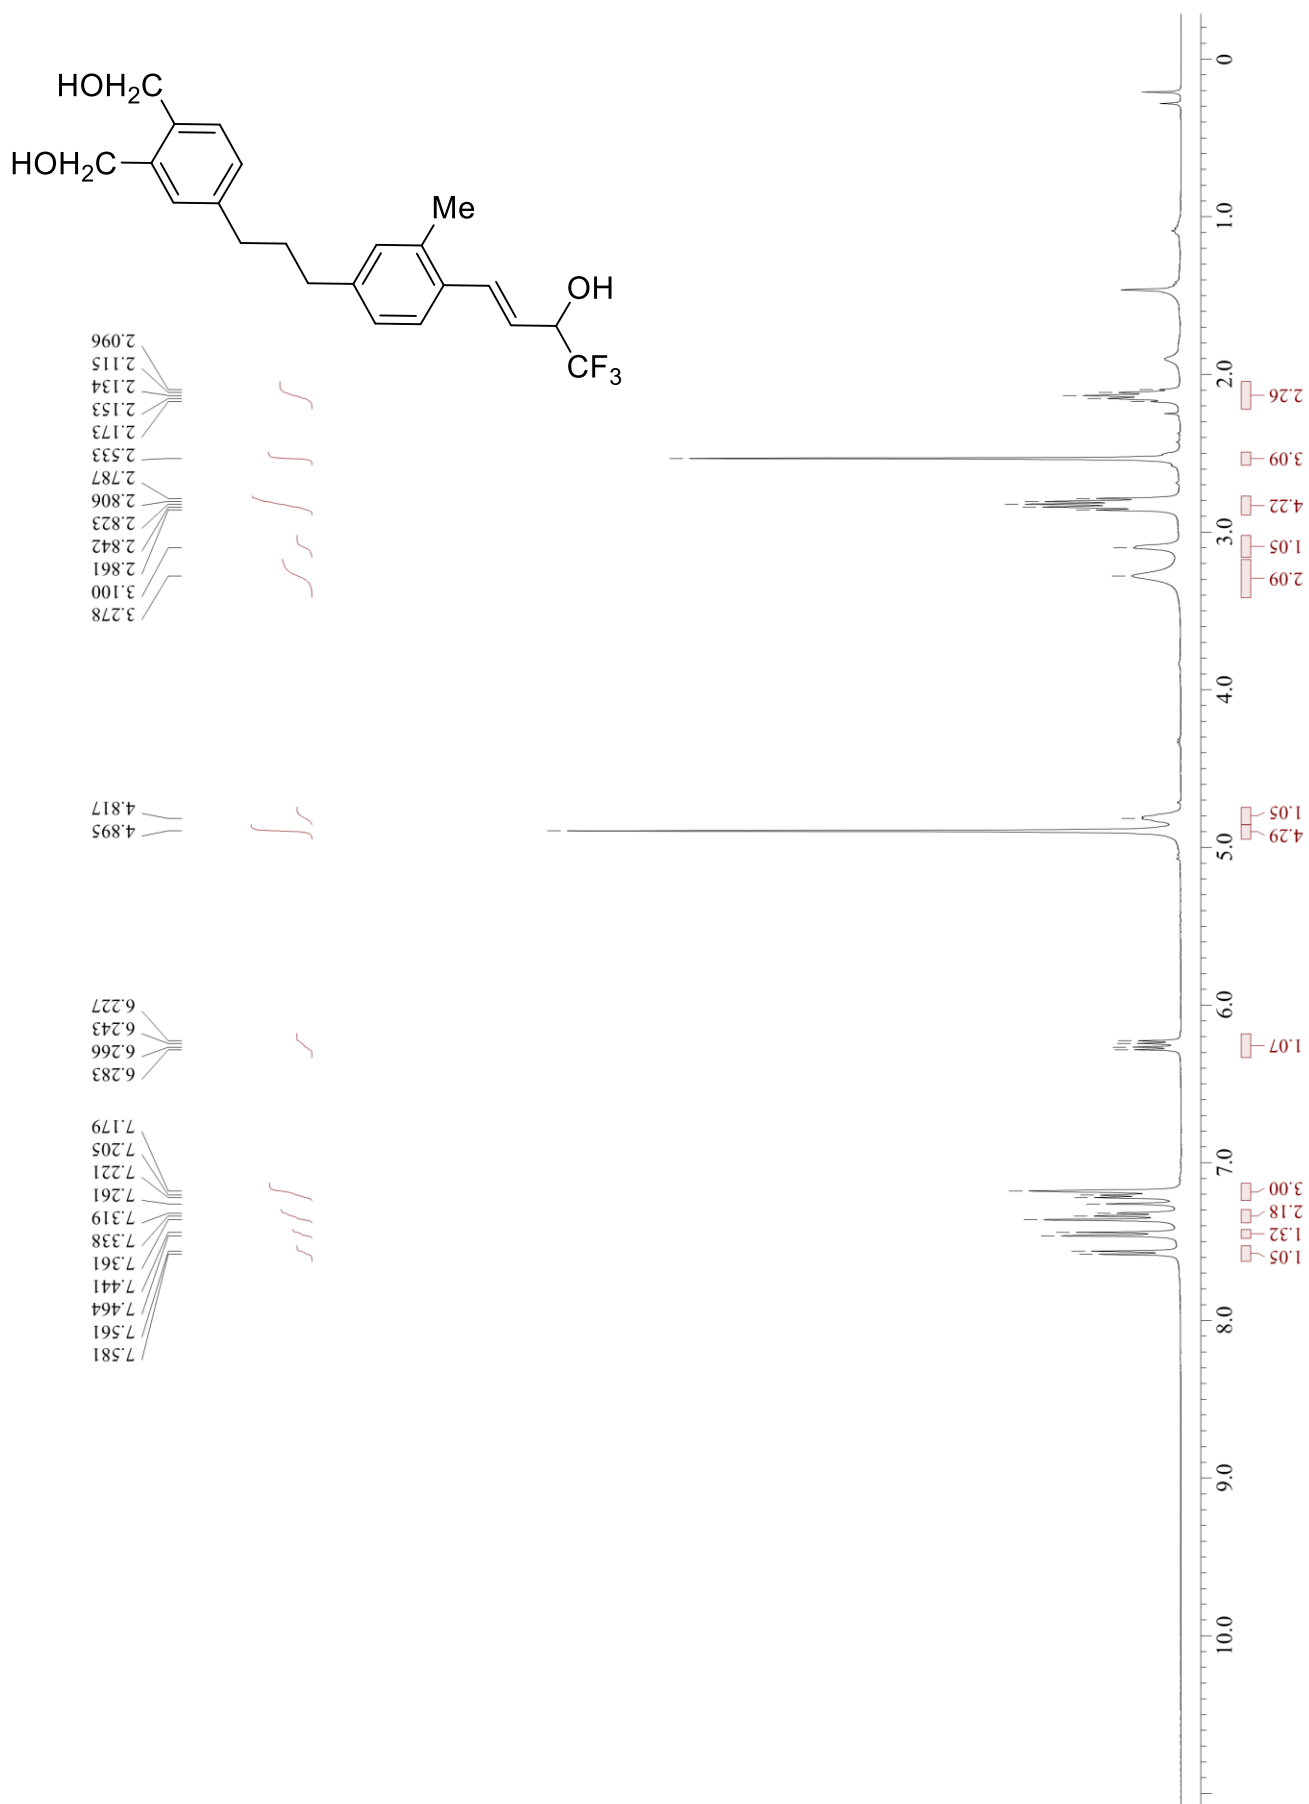

$^{13}\text{C}$  NMR of **antitumor agent Z** ( $\text{CDCl}_3$ , 150 MHz, 25 °C)

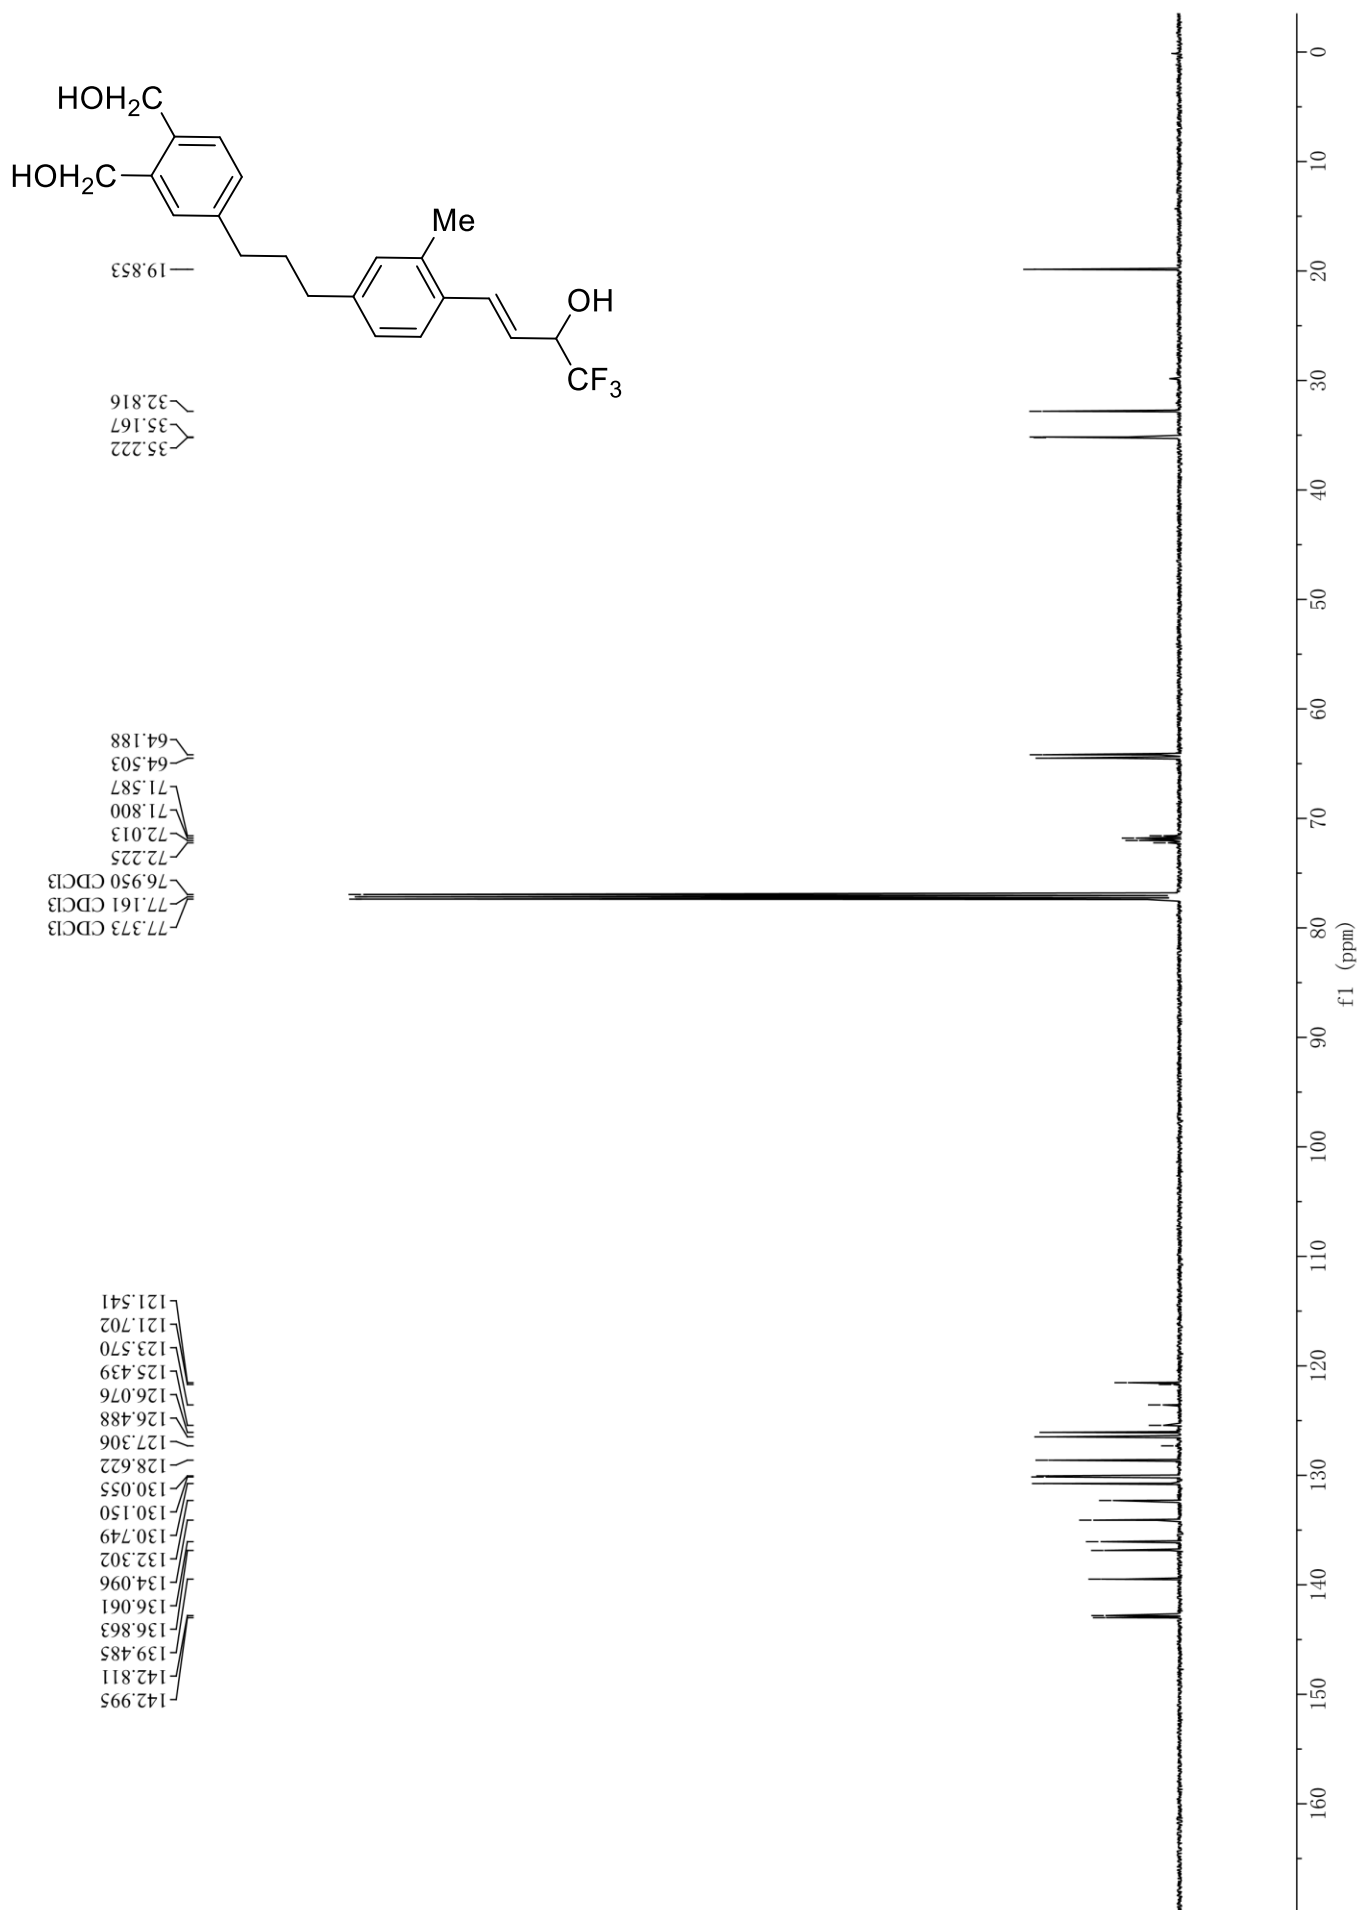



$^{19}\text{F}$  NMR of **antitumor agent Z** ( $\text{CDCl}_3$ , 375 MHz, 25 °C)

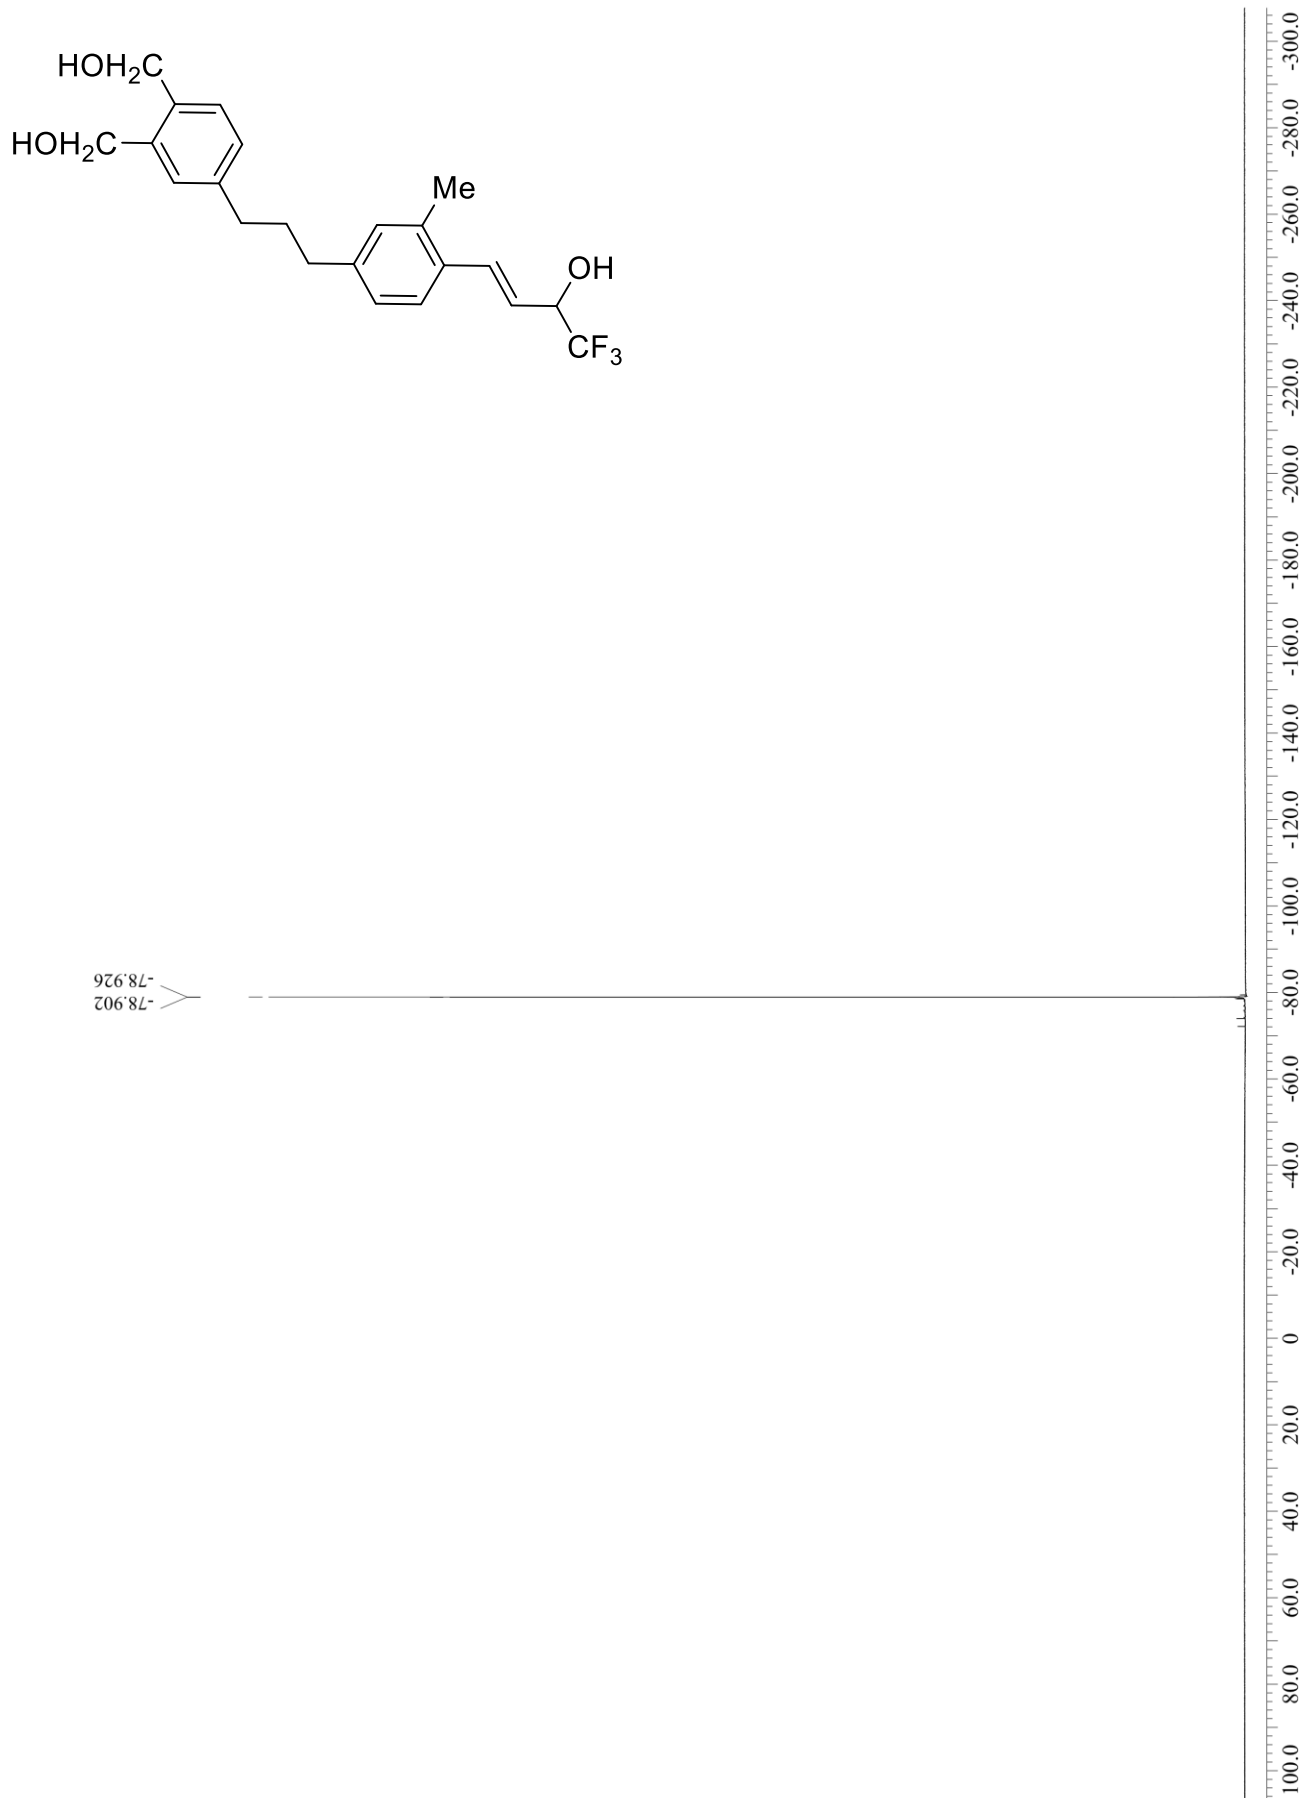

<sup>1</sup>H NMR of difluoro analog Z' of antitumor agent Z (CDCl<sub>3</sub>, 400 MHz, 25 °C)

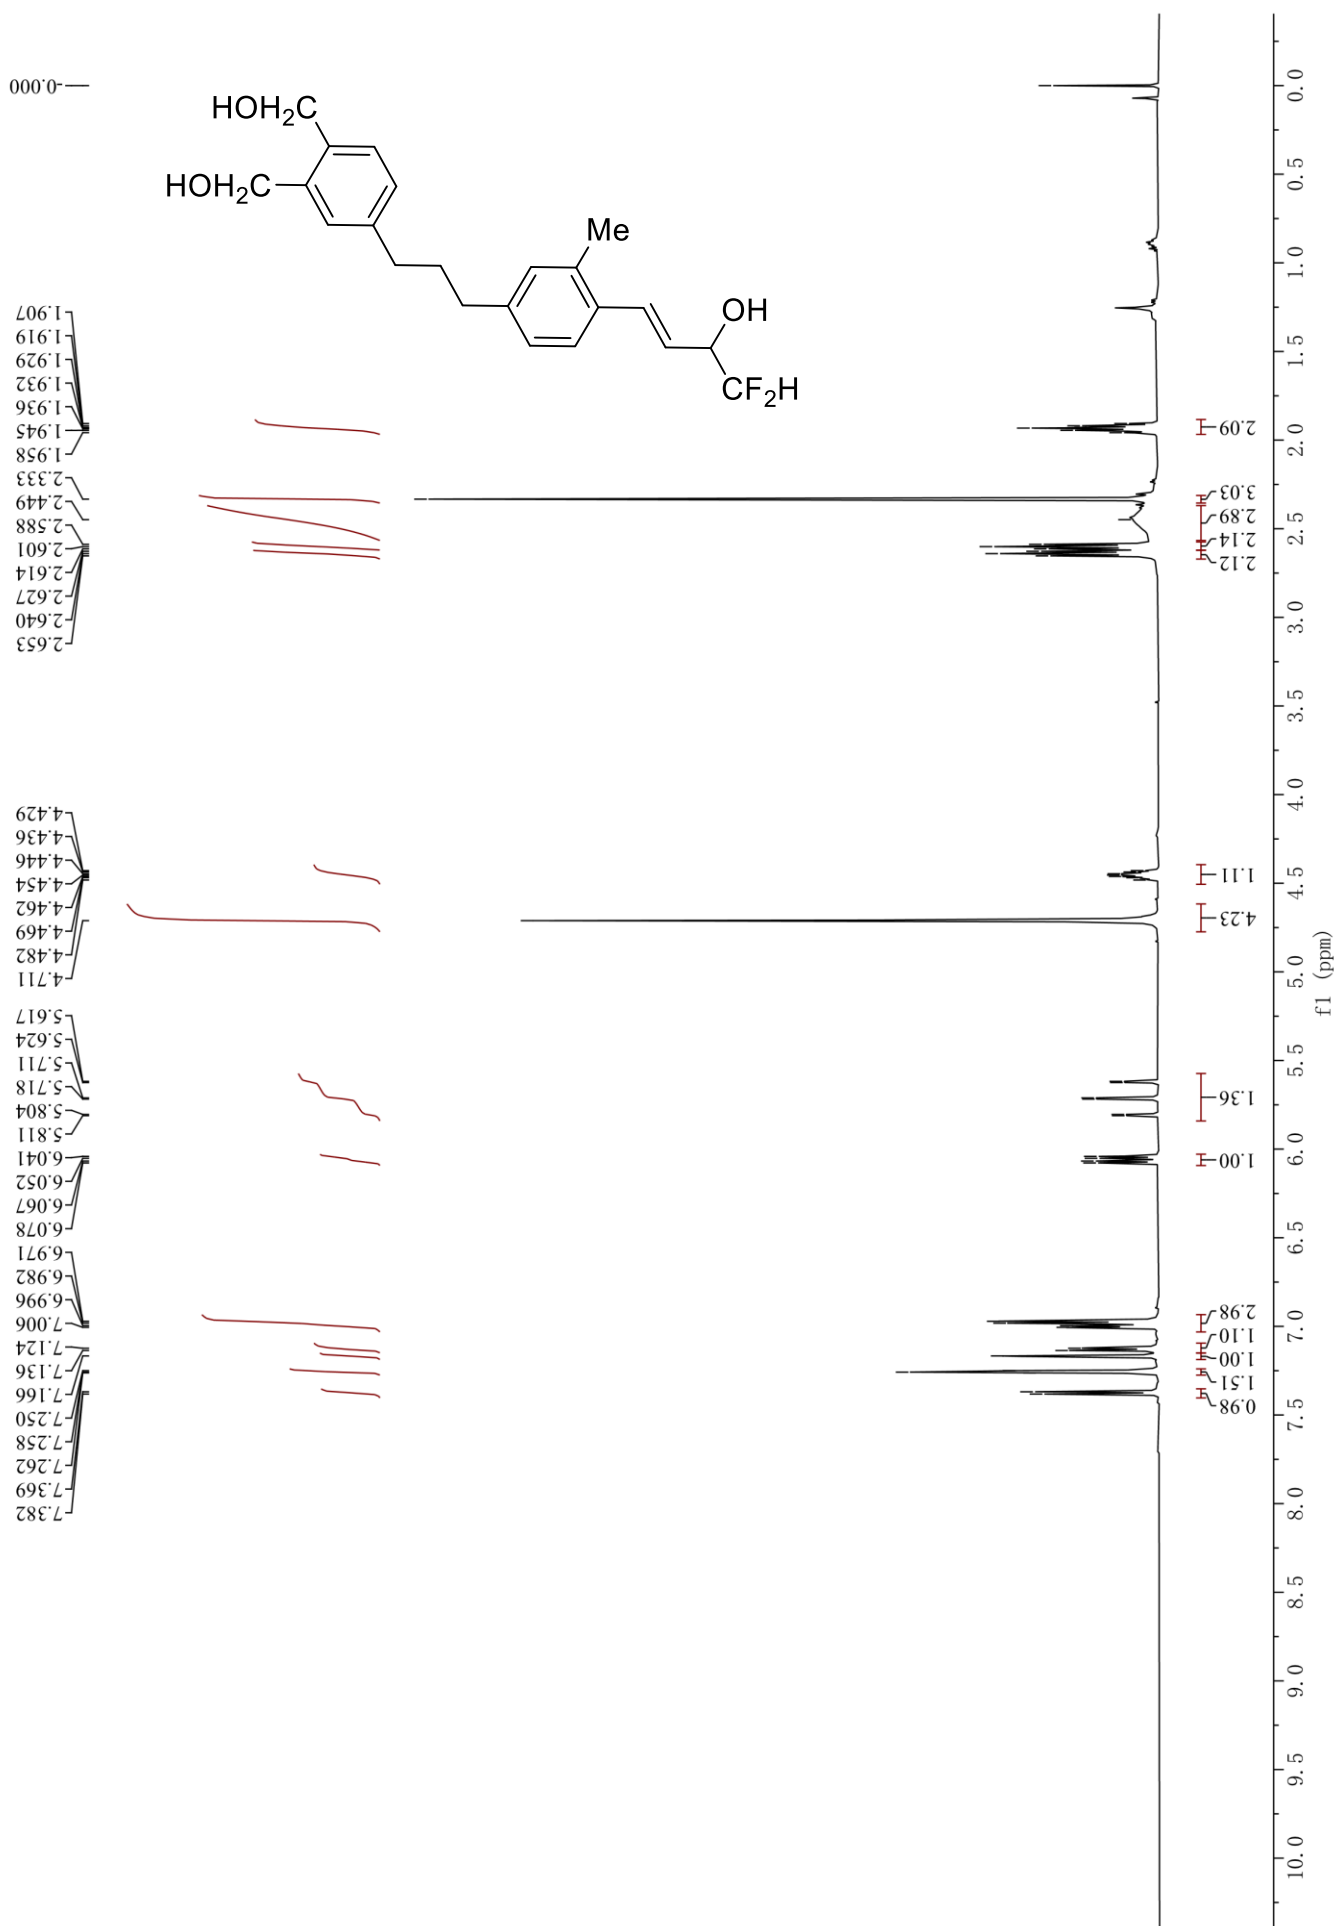

$^{13}\text{C}$  NMR of difluoro analog **Z'** of antitumor agent **Z** ( $\text{CDCl}_3$ , 100 MHz, 25 °C)

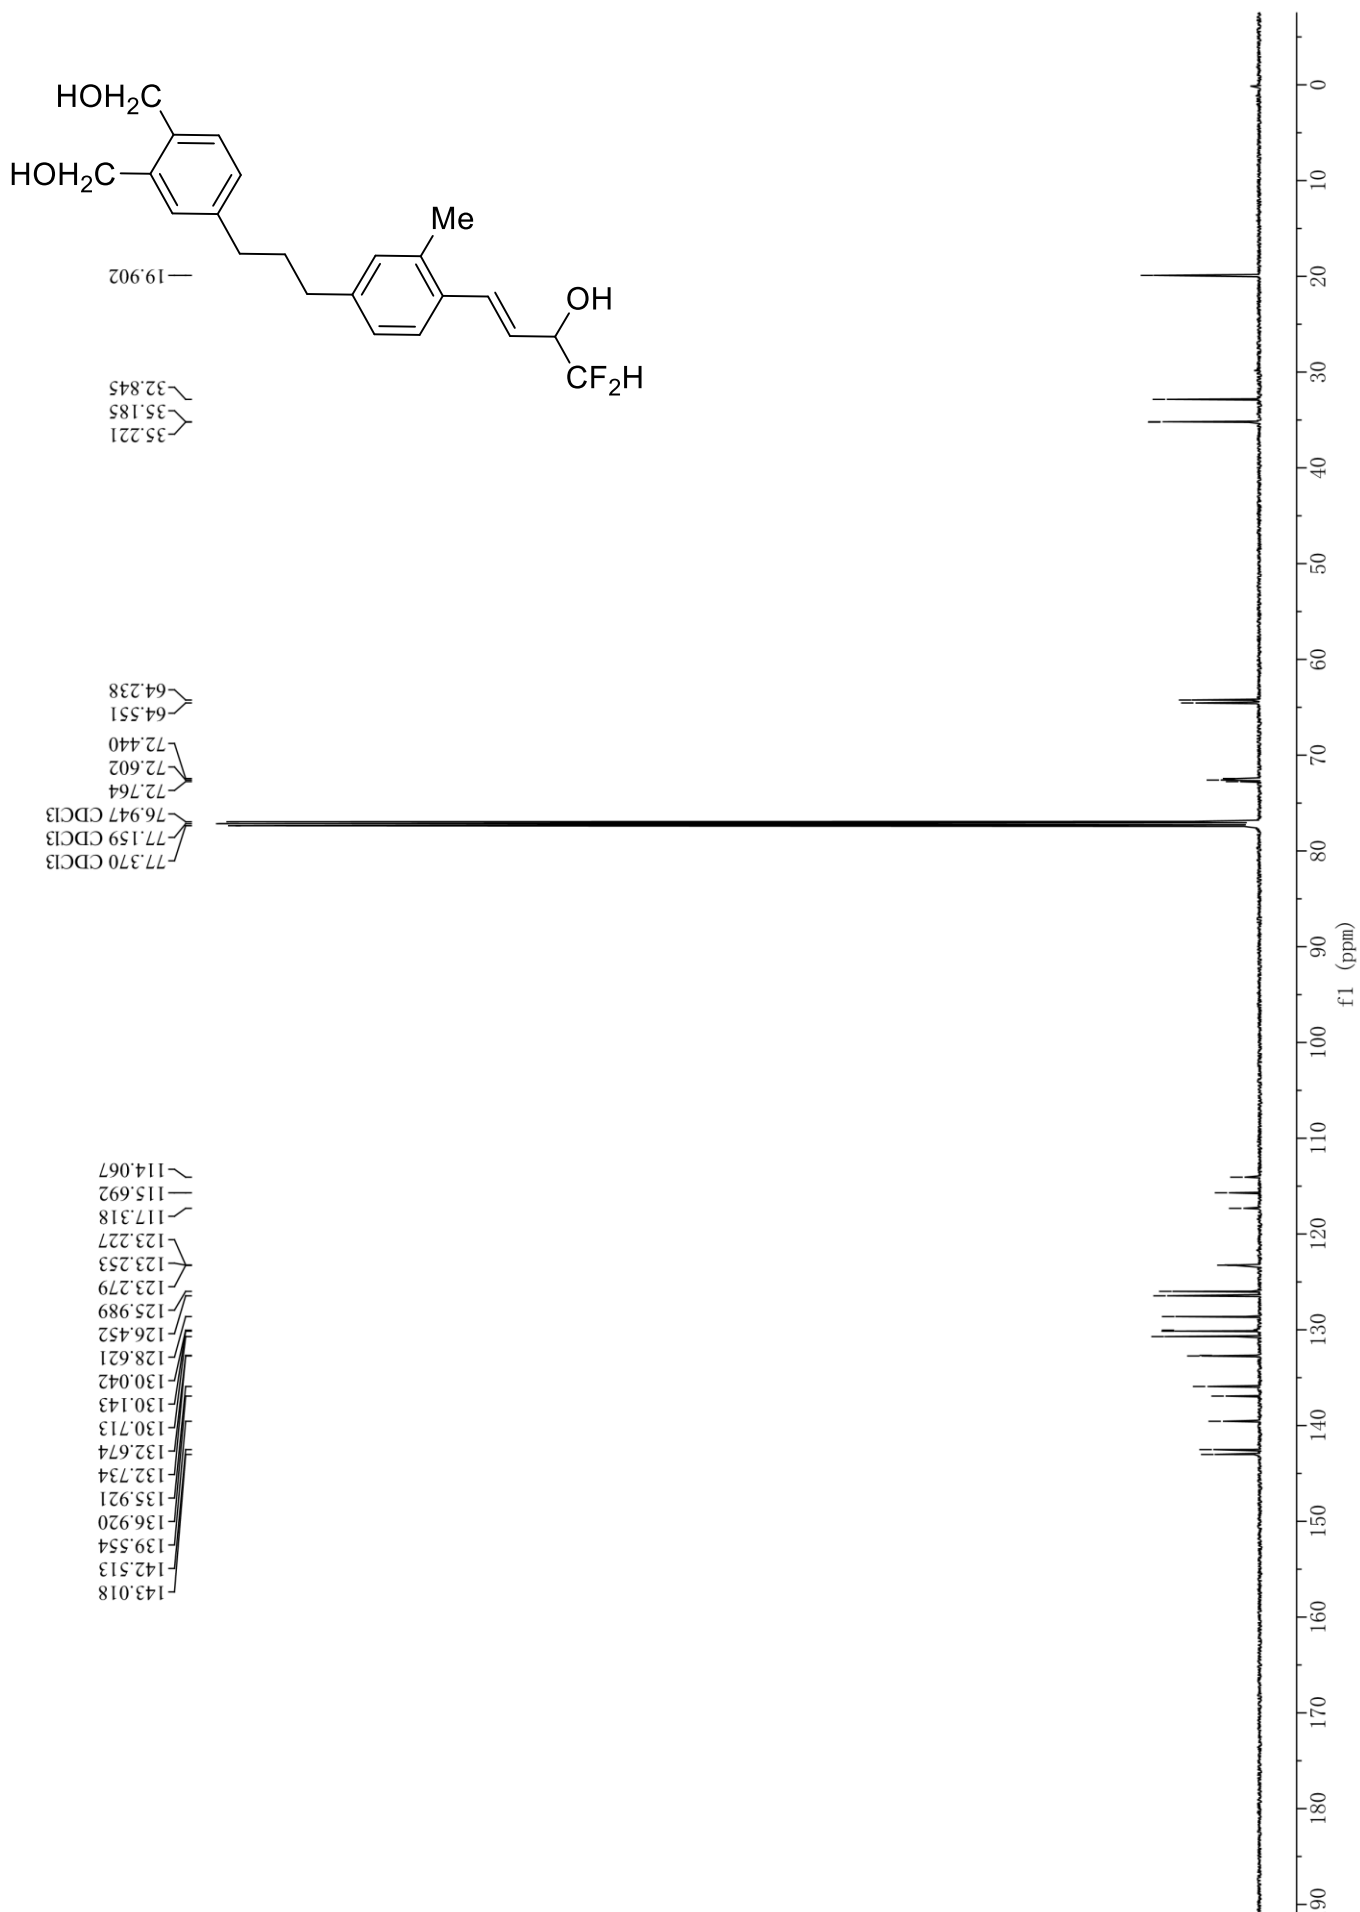

$^{19}\text{F}$  NMR of difluoro analog **Z'** of antitumor agent **Z** ( $\text{CDCl}_3$ , 375 MHz, 25 °C)

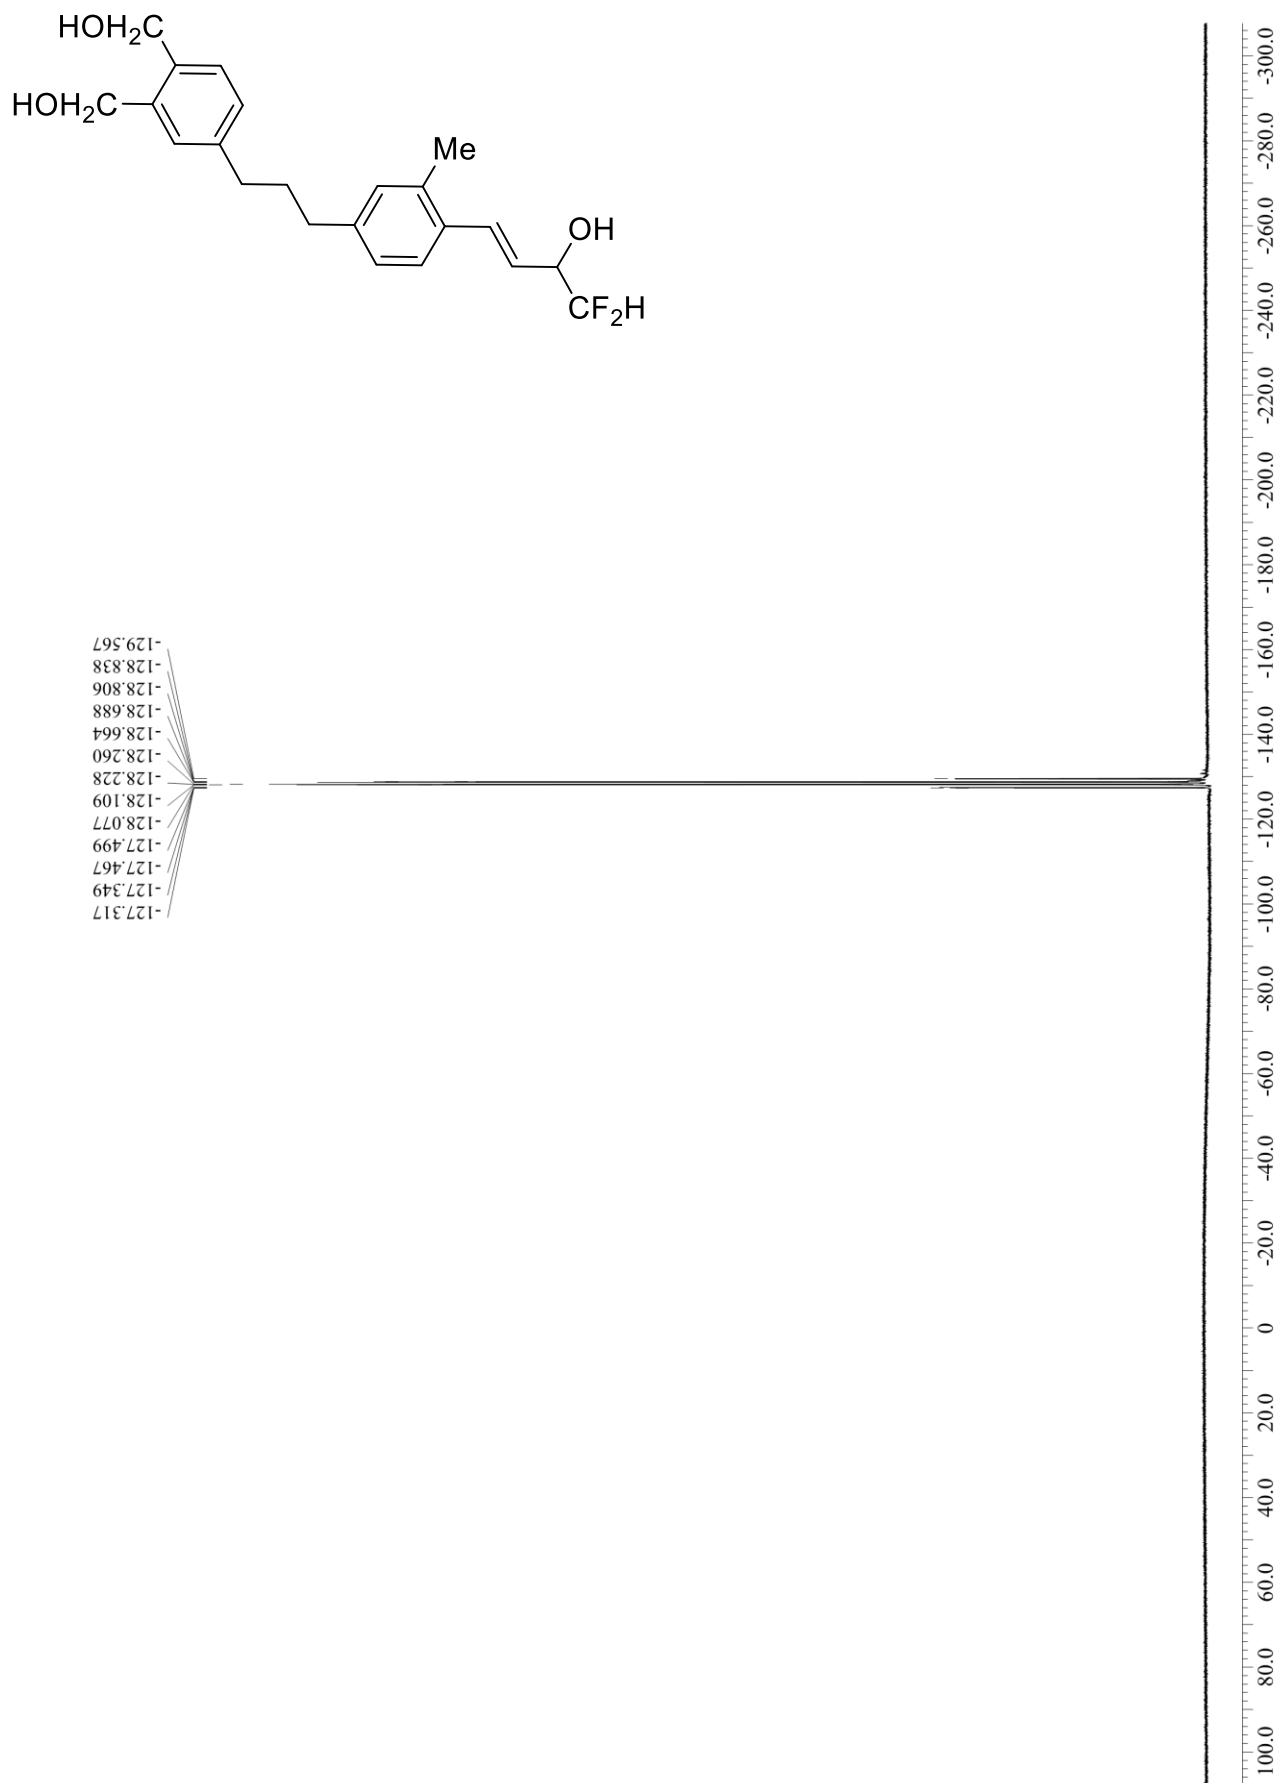

## Supplementary References

- [1] Chung, W. J. & Welch, J. T. A general method for synthesis of trifluoroacetyltrialkyl(aryl)silanes and the Sakurai reaction of fluorinated acylsilanes with allyl silanes. *J. Fluorine Chem.* **125**, 543–548 (2004).
- [2] Xiao, F. Liu, C. Wang, D. Huang, H. & Deng, G -J. Concise synthesis of ketoallyl sulfones through an iron-catalyzed sequential four-component assembly. *Green Chem.* **20**, 973–977 (2018).
- [3] Guo, H -M. Zhou, Q -Q. Jiang, X. Shi, D -Q. & Xiao, W -J. Catalyst- and Oxidant-Free Desulfonative C–P Couplings for the Synthesis of Phosphine Oxides and Phosphonates. *Adv. Synth. Catal.* **359**, 4141–4146 (2017).
- [4] Jecs, E. & Diver, S. T. Toward the synthesis of amphidinolide P: optimization of a model ene–yne metathesis fragment coupling. *Tetrahedron Lett.* **55**, 4933–4937 (2014).
- [5] Shrestha, T. B. Troyer, D. L. & Bossmann, S. H. Strategies for Large-Scale Synthesis of Coelenterazine for in Vivo Applications. *Synthesis*, **46**, 646–652 (2014).
- [6] Trost, B. M. & Schmuff, N. R. Stereochemistry of allyl sulfones. On the structure of metalated allyl sulfones and their stereochemistry of alkylation. *J. Am. Chem. Soc.* **107**, 396–405 (1985).
- [7] Paquette, L. A. Gilday, J. P. & Maynard, G. D. Intramolecular nucleophilic addition to unsaturated carbon. Dependence of cyclization efficiency on the method of carbon-carbon bond cleavage utilized to generate the reactive species. *J. Org. Chem.* **54**, 5044–5053 (1989).
- [8] Geoghegan, K. Evans, P. Rozas, I. & Alkorta, I. Regioselectivity in the Intramolecular Heck Reaction of a Series of Cyclic Sulfonamides: An Experimental and Computational Study. *Chem. Eur., J.* **18**, 13379–13387 (2012).
- [9] Larson, E. G. & Connell, G. Anisotropic Conductive Adhesive Compositions. *PCT Int. Appl.* 2008011452, **2008**.
- [10] Yang, Z. & Tang, A. Synthesis of Perfluoroalkyl-Substituted Oxindoles through Organophotoredox-Catalyzed Perfluoroalkylation of N-arylacrylamides with Perfluoroalkyl Iodides. *Synlett* **30**, 1061–1066 (2019).
- [11] Biadatti, T. Thoreau, E. Voegel, J. & Jomard, A. Analogues of Vitamin D. WO2004020379A1, (2004)
- [12] Harrowven, D. C. et al. Potassium carbonate–silica: a highly effective stationary phase for the chromatographic removal of organotin impurities. *Chem. Commun.* **46**, 6335–6337 (2010).
- [13] Wu, K., Wang, L., Colón-Rodríguez, S., Flechsig, G.-U. & Wang, T. Amidyl Radical Directed Remote Allylation of Unactivated sp<sup>3</sup> C–H Bonds by Organic Photoredox Catalysis. *Angew. Chem. Int. Ed.* **58**, 1774–1778 (2019).
- [14] Zhang, J., Li, Y., Zhang, F., Hu, C. & Chen, Y. Generation of Alkoxy Radicals by Photoredox Catalysis Enables Selective C(sp<sup>3</sup>)-H Functionalization under Mild Reaction Conditions. *Angew. Chem. Int. Ed.* **55**, 1872–1875 (2016)
- [15] Wei, W.-T. et al. Synthesis of Oxindoles by Iron-Catalyzed Oxidative 1,2-Alkylarylation of Activated Alkenes with an Aryl C(sp<sup>2</sup>)-H Bond and a C(sp<sup>3</sup>)-H Bond Adjacent to a Heteroatom. *Angew. Chem. Int. Ed.* **52**, 3638–3641 (2013).
- [16] Li, Y.-M. et al. Direct Annulations toward Phosphorylated Oxindoles: Silver-Catalyzed Carbo-Phosphorus Functionalization of Alkenes. *Angew. Chem. Int. Ed.* **52**, 3972–3976 (2013).
- [17] Li, G. et al. Nickel-Catalyzed Decarboxylative Difluoroalkylation of  $\alpha,\beta$ -Unsaturated Carboxylic Acids. *Angew. Chem. Int. Ed.* **55**, 3491–3495 (2016).
- [18] Cui, Z., Shang, X., Shao, X.-F. & Liu, Z.-Q. Copper-catalyzed decarboxylative alkenylation of sp<sup>3</sup> C–H bonds with cinnamic acids via a radical process. *Chem. Sci.* **3**, 2853–2858 (2012)
